# Supplementary material for: Molecular insights into Mmpl3 lead to the development of novel indole-2-carboxamides as antitubercular agents
Source: Royal Society of Chemistry journal article supplement (doi:10.1039/d1me00122a), 2022-01-01
Supplement: d1me00122a1.sdf [file d1me00122a1.sdf]

GR-5
                    3D
 Structure written by MMmdl.
 42 44  0  0  1  0            999 V2000
   -3.3343    1.7168   -0.0363 C   0  0  0  0  0  0
   -2.1814    0.9240   -0.0524 C   0  0  0  0  0  0
   -2.2270   -0.4976   -0.0065 C   0  0  0  0  0  0
   -3.4843   -1.1233    0.0566 C   0  0  0  0  0  0
   -4.6357   -0.3382    0.0724 C   0  0  0  0  0  0
   -4.5584    1.0510    0.0270 C   0  0  0  0  0  0
   -0.8717   -0.9840   -0.0413 C   0  0  0  0  0  0
   -0.0440    0.1451   -0.0970 C   0  0  0  0  0  0
   -0.8521    1.2638   -0.1177 N   0  0  0  0  0  0
   -0.4971   -2.4542   -0.0164 C   0  0  0  0  0  0
    1.3973    0.2146   -0.2252 C   0  0  0  0  0  0
    1.9431    1.3913    0.1477 N   0  0  0  0  0  0
    3.3646    1.7564    0.0908 C   0  0  1  0  0  0
    3.8491    2.4200   -1.2353 C   0  0  1  0  0  0
    5.3907    2.5199   -1.2101 C   0  0  0  0  0  0
    5.8653    3.3975   -0.0354 C   0  0  0  0  0  0
    5.3291    2.8760    1.3141 C   0  0  0  0  0  0
    3.8050    2.6104    1.3042 C   0  0  0  0  0  0
    2.0537   -0.7373   -0.6489 O   0  0  0  0  0  0
    3.3596    1.7158   -2.5175 C   0  0  0  0  0  0
   -3.2887    2.7953   -0.0730 H   0  0  0  0  0  0
   -3.5629   -2.1998    0.0915 H   0  0  0  0  0  0
   -5.6040   -0.8150    0.1192 H   0  0  0  0  0  0
   -5.4713    1.6282    0.0398 H   0  0  0  0  0  0
   -0.4700    2.1960   -0.1822 H   0  0  0  0  0  0
    0.5667   -2.6310    0.1340 H   0  0  0  0  0  0
   -0.7767   -2.9503   -0.9459 H   0  0  0  0  0  0
   -1.0104   -2.9783    0.7902 H   0  0  0  0  0  0
    1.3246    2.1090    0.4952 H   0  0  0  0  0  0
    3.9082    0.8145    0.2059 H   0  0  0  0  0  0
    3.4785    3.4472   -1.2467 H   0  0  0  0  0  0
    5.8433    1.5270   -1.1874 H   0  0  0  0  0  0
    5.7425    2.9636   -2.1428 H   0  0  0  0  0  0
    6.9551    3.4340   -0.0132 H   0  0  0  0  0  0
    5.5293    4.4244   -0.1876 H   0  0  0  0  0  0
    5.8460    1.9479    1.5631 H   0  0  0  0  0  0
    5.5788    3.5797    2.1091 H   0  0  0  0  0  0
    3.2760    3.5647    1.2896 H   0  0  0  0  0  0
    3.5221    2.1166    2.2352 H   0  0  0  0  0  0
    3.6776    0.6730   -2.5450 H   0  0  0  0  0  0
    3.7519    2.2039   -3.4101 H   0  0  0  0  0  0
    2.2726    1.7374   -2.5977 H   0  0  0  0  0  0
  1  2  1  0  0  0
  1  6  2  0  0  0
  1 21  1  0  0  0
  2  3  2  0  0  0
  2  9  1  0  0  0
  3  4  1  0  0  0
  3  7  1  0  0  0
  4  5  2  0  0  0
  4 22  1  0  0  0
  5  6  1  0  0  0
  5 23  1  0  0  0
  6 24  1  0  0  0
  7  8  2  0  0  0
  7 10  1  0  0  0
  8  9  1  0  0  0
  8 11  1  0  0  0
  9 25  1  0  0  0
 10 26  1  0  0  0
 10 27  1  0  0  0
 10 28  1  0  0  0
 11 12  1  0  0  0
 11 19  2  0  0  0
 12 13  1  0  0  0
 12 29  1  0  0  0
 13 18  1  0  0  0
 13 14  1  0  0  0
 13 30  1  0  0  0
 14 15  1  0  0  0
 14 20  1  0  0  0
 14 31  1  0  0  0
 15 16  1  0  0  0
 15 32  1  0  0  0
 15 33  1  0  0  0
 16 17  1  0  0  0
 16 34  1  0  0  0
 16 35  1  0  0  0
 17 18  1  0  0  0
 17 36  1  0  0  0
 17 37  1  0  0  0
 18 38  1  0  0  0
 18 39  1  0  0  0
 20 40  1  0  0  0
 20 41  1  0  0  0
 20 42  1  0  0  0
M  END
> <s_m_entry_id>
7674

> <s_m_entry_name>
entry

> <i_f3d_flags>
0

> <s_m_job_name>
adme_1000

> <r_psp_Prime_Energy>
-34938.0432912752

> <r_psp_Prime_Solv_GB>
-5194.57681669906

> <r_psp_Prime_Coulomb>
-26462.7275459149

> <r_psp_Prime_vdW>
-4520.02530763364

> <r_psp_Prime_Covalent>
4021.76499359254

> <i_psp_model_num>
0

> <r_psp_Prime_Lipo>
-2136.12190494384

> <s_psp_Prime_Energy_Force_Field>
OPLS3e

> <s_psp_Prime_Energy_Solvent_Model>
VSGB2.1

> <r_psp_Prime_Hbond>
-550.104175688741

> <r_psp_Prime_Packing>
-55.8446424272089

> <r_psp_Prime_SelfCont>
-40.4078915603482

> <r_psp_Memb1_x>
103.457542316003

> <r_psp_Memb1_y>
39.4731108300965

> <r_psp_Memb1_z>
48.7987221124676

> <r_psp_Memb2_x>
99.8134167309003

> <r_psp_Memb2_y>
2.81176945184187

> <r_psp_Memb2_z>
23.8404289603493

> <r_psp_MembDummyRadius>
4.45

> <r_psp_Prime_Bond_Covalent>
467.14079144399

> <r_psp_Prime_Bond_SGB>
49990.9892542772

> <r_psp_Prime_Angle_Covalent>
2222.48534938499

> <r_psp_Prime_Angle_SGB>
-21642.6622885493

> <r_psp_Prime_Torsion_Covalent>
1332.13885276356

> <r_psp_Prime_NB14_LJ>
4077.67532522667

> <r_psp_Prime_NB14_Lipo>
0

> <r_psp_Prime_NB14_Elec>
25574.3506183625

> <r_psp_Prime_NB14_SGB>
-15626.0783021708

> <r_psp_Prime_NBShort_LJ>
-8189.94090669715

> <r_psp_Prime_NBShort_Lipo>
-2136.12190494384

> <r_psp_Prime_NBShort_Elec>
-53055.0066709594

> <r_psp_Prime_NBShort_SGB>
18025.373077635

> <r_psp_Prime_NBLong_LJ>
-407.759726163158

> <r_psp_Prime_NBLong_Lipo>
0

> <r_psp_Prime_NBLong_Elec>
1017.92850668197

> <r_psp_Prime_NBLong_SGB>
-1169.82127024442

> <r_psp_Prime_Self_SGB>
-34772.3772876467

> <s_m_Source_Path>
F:\Dekstop_files\DAC4,5\Molecular Systems Desgn and Engineering\supplementary_str

> <s_m_Source_File>
1000_str.mae

> <i_m_Source_File_Index>
598

> <i_lp_mmshare_version>
53156

> <s_epik_input>
W2NIXTFbY0hdW2NIXVtjSF1jKGMxMiljKFtDSDNdKWMoW25IXTIpQyg9TylbTkhdW0NASF0zW0NASF0oW0NIM10pW0NIMl1bQ0gyXVtDSDJdW0NIMl0z

> <s_epik_cmdline>
J2VwaWtfcHl0aG9uJywgJy1waHQnLCAnMC4wJywgJy1waCcsICc3LjAnLCAnLXRuJywgJzgnLCAnLW1hJywgJzUwMCcsICctaW1hZScsICc8aW5maWxlLm1hZT4nLCAnLW9tYWUnLCAnPG91dGZpbGUubWFlPic=

> <r_lp_tautomer_probability>
1

> <r_epik_Ionization_Penalty>
  0.0000

> <r_epik_Ionization_Penalty_Charging>
  0.0000

> <r_epik_Ionization_Penalty_Neutral>
  0.0000

> <r_epik_State_Penalty>
  0.0000

> <r_epik_Charging_Adjusted_Penalty>
0

> <i_epik_Tot_Q>
0

> <i_epik_Tot_abs_Q>
0

> <s_lp_Force_Field>
S-OPLS

> <r_lp_Energy>
26.159121

> <b_lp_Chiralities_Consistent>
1

> <s_lp_Variant>
GR-5-1

> <s_i_glide_gridfile>
glide-grid_1_oct_mmpl3_after_loop_refinement

> <i_i_glide_lignum>
1

> <i_i_glide_rotatable_bonds>
3

> <r_i_docking_score>
-8.55395205809026

> <r_i_glide_ligand_efficiency>
-0.427697602904513

> <r_i_glide_ligand_efficiency_sa>
-1.16094990674012

> <r_i_glide_ligand_efficiency_ln>
-2.14077207191912

> <r_glide_XP_GScore>
-8.55395205809026

> <r_i_glide_gscore>
-8.55395205809026

> <r_i_glide_evdw>
-38.4568176269531

> <r_i_glide_ecoul>
-0.993711650371552

> <r_i_glide_energy>
-39.4505292773247

> <r_i_glide_einternal>
3.87462186813354

> <r_i_glide_emodel>
-51.4731941223145

> <r_glide_XP_HBond>
0

> <r_glide_XP_PhobEn>
-2.24756940200945

> <r_glide_XP_PhobEnHB>
0

> <r_glide_XP_LowMW>
-0.5

> <r_glide_XP_RotPenal>
0.314570499084994

> <r_glide_XP_LipophilicEvdW>
-5.74948434161975

> <r_glide_XP_PhobEnPairHB>
0

> <r_glide_XP_Electro>
-0.0745283737778664

> <r_glide_XP_Sitemap>
-0.297225298955418

> <r_glide_XP_Penalties>
0.000284859187223831

> <r_glide_XP_PiStack>
0

> <r_glide_XP_HBPenal>
0

> <r_glide_XP_ExposPenal>
0

> <r_glide_XP_PiCat>
0

> <r_glide_XP_ClBr>
0

> <r_glide_XP_Zpotr>
0

> <i_i_glide_confnum>
1

> <i_i_glide_posenum>
9

> <r_i_glide_eff_state_penalty>
0

> <i_glide_XP_PoseRank>
1

> <r_i_glide_rmsd_to_input>
108.120928346084

> <s_psp_Prime_MMGBSA_Input_Structure_Hash>
bce579ad17085e927dd80ccadc2ab72f87e6ec48a470342ff1b940af

> <i_psp_number_heavy_atoms>
20

> <r_psp_MMGBSA_dG_Bind>
-40.9394065847955

> <r_psp_MMGBSA_dG_Bind_Coulomb>
-4.14784462538955

> <r_psp_MMGBSA_dG_Bind_Covalent>
0.745142539807148

> <r_psp_MMGBSA_dG_Bind_Hbond>
-0.00657060555965927

> <r_psp_MMGBSA_dG_Bind_Lipo>
-21.152623347778

> <r_psp_MMGBSA_dG_Bind_Packing>
4.9737991503207e-014

> <r_psp_MMGBSA_dG_Bind_SelfCont>
7.105427357601e-015

> <r_psp_MMGBSA_dG_Bind_Solv_GB>
23.5170871843875

> <r_psp_MMGBSA_dG_Bind_vdW>
-39.8945977303074

> <r_psp_Lig_Strain_Energy>
2.3443687207922

> <r_psp_Lig_Strain_Coulomb>
1.57410625096248

> <r_psp_Lig_Strain_Covalent>
0.745343407915311

> <r_psp_Lig_Strain_Hbond>
0

> <r_psp_Lig_Strain_Lipo>
-0.010120675895553

> <r_psp_Lig_Strain_Packing>
0

> <r_psp_Lig_Strain_SelfCont>
0

> <r_psp_Lig_Strain_Solv_GB>
-0.578768566136517

> <r_psp_Lig_Strain_vdW>
0.613808303946499

> <r_psp_Ligand_Energy>
16.6428921003678

> <r_psp_Ligand_Coulomb>
2.05872713656927

> <r_psp_Ligand_Covalent>
11.8645100835002

> <r_psp_Ligand_Hbond>
0

> <r_psp_Ligand_Lipo>
-1.48605344298646

> <r_psp_Ligand_Packing>
0

> <r_psp_Ligand_SelfCont>
0

> <r_psp_Ligand_Solv_GB>
-8.26957264543407

> <r_psp_Ligand_vdW>
12.4752809687189

> <r_psp_Complex_Energy>
-34938.0432912752

> <r_psp_Complex_Coulomb>
-26462.7275459149

> <r_psp_Complex_Covalent>
4021.76499359254

> <r_psp_Complex_Hbond>
-550.104175688741

> <r_psp_Complex_Lipo>
-2136.12190494384

> <r_psp_Complex_Packing>
-55.8446424272089

> <r_psp_Complex_SelfCont>
-40.4078915603482

> <r_psp_Complex_Solv_GB>
-5194.57681669906

> <r_psp_Complex_vdW>
-4520.02530763364

> <r_psp_Receptor_Energy>
-34913.7467767908

> <r_psp_Receptor_Coulomb>
-26460.6384284261

> <r_psp_Receptor_Covalent>
4009.15534096923

> <r_psp_Receptor_Hbond>
-550.097605083181

> <r_psp_Receptor_Lipo>
-2113.48322815308

> <r_psp_Receptor_Packing>
-55.8446424272089

> <r_psp_Receptor_SelfCont>
-40.4078915603482

> <r_psp_Receptor_Solv_GB>
-5209.82433123801

> <r_psp_Receptor_vdW>
-4492.60599087205

> <r_psp_MMGBSA_dG_Bind(NS)>
-43.2837753056374

> <r_psp_MMGBSA_dG_Bind(NS)_Coulomb>
-5.721950876341

> <r_psp_MMGBSA_dG_Bind(NS)_Covalent>
-0.000200868112187891

> <r_psp_MMGBSA_dG_Bind(NS)_Hbond>
-0.0065706055594319

> <r_psp_MMGBSA_dG_Bind(NS)_Lipo>
-21.1425026718794

> <r_psp_MMGBSA_dG_Bind(NS)_Packing>
0

> <r_psp_MMGBSA_dG_Bind(NS)_SelfCont>
0

> <r_psp_MMGBSA_dG_Bind(NS)_Solv_GB>
24.095855750521

> <r_psp_MMGBSA_dG_Bind(NS)_vdW>
-40.5084060342588

> <r_psp_Rec_Strain_Energy>
5.0931703299284e-011

> <r_psp_Rec_Strain_Coulomb>
-1.09139364212751e-011

> <r_psp_Rec_Strain_Covalent>
4.09272615797818e-012

> <r_psp_Rec_Strain_Hbond>
-2.27373675443232e-013

> <r_psp_Rec_Strain_Lipo>
-2.72848410531878e-012

> <r_psp_Rec_Strain_Packing>
4.9737991503207e-014

> <r_psp_Rec_Strain_SelfCont>
7.105427357601e-015

> <r_psp_Rec_Strain_Solv_GB>
2.72848410531878e-012

> <r_psp_Rec_Strain_vdW>
4.54747350886464e-012

> <r_psp_Prime_MMGBSA_ligand_efficiency>
-2.04697032923978

> <r_psp_Prime_MMGBSA_ligand_efficiency_sa>
-3.07045549385966

> <r_psp_Prime_MMGBSA_ligand_efficiency_ln>
-10.2457831961755

> <i_psp_ExecuteFunction_Internal_Entry_Index>
82

> <b_m_m_glide_XPvisualizer>
1

> <i_qp_#stars>
0

> <i_qp_#amine>
0

> <i_qp_#amidine>
0

> <i_qp_#acid>
0

> <i_qp_#amide>
0

> <i_qp_#rotor>
2

> <i_qp_#rtvFG>
0

> <i_qp_CNS>
1

> <r_qp_mol_MW>
   270.374

> <r_qp_dipole>
     5.657

> <r_qp_SASA>
   561.797

> <r_qp_FOSA>
   335.980

> <r_qp_FISA>
    43.387

> <r_qp_PISA>
   182.429

> <r_qp_WPSA>
     0.000

> <r_qp_volume>
   965.486

> <r_qp_donorHB>
     2.000

> <r_qp_accptHB>
     2.500

> <r_qp_dip^2/V>
   0.0331508

> <r_qp_ACxDN^.5/SA>
   0.0062933

> <r_qp_glob>
   0.8409107

> <r_qp_QPpolrz>
    32.943

> <r_qp_QPlogPC16>
     9.186

> <r_qp_QPlogPoct>
    14.972

> <r_qp_QPlogPw>
     7.558

> <r_qp_QPlogPo/w>
     3.969

> <r_qp_QPlogS>
    -5.055

> <r_qp_CIQPlogS>
    -4.074

> <r_qp_QPlogHERG>
    -4.976

> <r_qp_QPPCaco>
  3841.122

> <r_qp_QPlogBB>
     0.034

> <r_qp_QPPMDCK>
  2118.751

> <r_qp_QPlogKp>
    -1.484

> <r_qp_IP(eV)>
     8.335

> <r_qp_EA(eV)>
     0.366

> <i_qp_#metab>
1

> <r_qp_QPlogKhsa>
     0.570

> <i_qp_HumanOralAbsorption>
3

> <r_qp_PercentHumanOralAbsorption>
   100.000

> <r_qp_SAfluorine>
     0.000

> <r_qp_SAamideO>
     0.000

> <r_qp_PSA>
    45.833

> <i_qp_#NandO>
3

> <i_qp_RuleOfFive>
0

> <i_qp_RuleOfThree>
0

> <i_qp_#ringatoms>
15

> <i_qp_#in34>
0

> <i_qp_#in56>
15

> <i_qp_#noncon>
6

> <i_qp_#nonHatm>
20

> <r_qp_Jm>
0.0781582067663822

> <s_m_subgroupid>
1000_str-imp1->adme_1000-out12

> <s_m_subgroup_title>
1000_str->adme_1000-out1

> <b_m_subgroup_collapsed>
0

$$$$
GR-6
                    3D
 Structure written by MMmdl.
 42 44  0  0  1  0            999 V2000
   -3.2794    1.7293   -0.0000 C   0  0  0  0  0  0
   -2.1572    0.8932   -0.0000 C   0  0  0  0  0  0
   -2.2569   -0.5253    0.0000 C   0  0  0  0  0  0
   -3.5385   -1.1036    0.0000 C   0  0  0  0  0  0
   -4.6598   -0.2757    0.0000 C   0  0  0  0  0  0
   -4.5293    1.1101   -0.0000 C   0  0  0  0  0  0
   -0.9203   -1.0633    0.0000 C   0  0  0  0  0  0
   -0.0453    0.0349   -0.0000 C   0  0  0  0  0  0
   -0.8149    1.1824   -0.0000 N   0  0  0  0  0  0
   -0.6219   -2.5523    0.0000 C   0  0  0  0  0  0
    1.4088    0.0564   -0.0000 C   0  0  0  0  0  0
    1.9631    1.2859    0.0000 N   0  0  0  0  0  0
    3.3988    1.5939   -0.0000 C   0  0  1  0  0  0
    3.7839    2.4199   -1.2554 C   0  0  0  0  0  0
    3.1304    3.8214   -1.2634 C   0  0  0  0  0  0
    3.5227    4.6215   -0.0000 C   0  0  2  0  0  0
    3.1305    3.8214    1.2635 C   0  0  0  0  0  0
    3.7838    2.4200    1.2554 C   0  0  0  0  0  0
    2.0728   -0.9800   -0.0000 O   0  0  0  0  0  0
    2.9107    6.0325    0.0000 C   0  0  0  0  0  0
   -3.1921    2.8059   -0.0000 H   0  0  0  0  0  0
   -3.6586   -2.1770    0.0000 H   0  0  0  0  0  0
   -5.6463   -0.7161    0.0000 H   0  0  0  0  0  0
   -5.4198    1.7215   -0.0000 H   0  0  0  0  0  0
   -0.3990    2.1021   -0.0000 H   0  0  0  0  0  0
    0.4365   -2.8019    0.0000 H   0  0  0  0  0  0
   -1.0535   -3.0383   -0.8752 H   0  0  0  0  0  0
   -1.0536   -3.0383    0.8752 H   0  0  0  0  0  0
    1.3481    2.0854    0.0000 H   0  0  0  0  0  0
    3.9805    0.6695   -0.0000 H   0  0  0  0  0  0
    4.8691    2.5222   -1.3073 H   0  0  0  0  0  0
    3.4992    1.8757   -2.1572 H   0  0  0  0  0  0
    3.4233    4.3713   -2.1589 H   0  0  0  0  0  0
    2.0445    3.7370   -1.3320 H   0  0  0  0  0  0
    4.6104    4.7172    0.0000 H   0  0  0  0  0  0
    3.4233    4.3713    2.1589 H   0  0  0  0  0  0
    2.0445    3.7370    1.3320 H   0  0  0  0  0  0
    3.4992    1.8757    2.1572 H   0  0  0  0  0  0
    4.8692    2.5222    1.3073 H   0  0  0  0  0  0
    1.8206    5.9956   -0.0000 H   0  0  0  0  0  0
    3.2239    6.5976   -0.8785 H   0  0  0  0  0  0
    3.2239    6.5976    0.8785 H   0  0  0  0  0  0
  1  2  1  0  0  0
  1  6  2  0  0  0
  1 21  1  0  0  0
  2  3  2  0  0  0
  2  9  1  0  0  0
  3  4  1  0  0  0
  3  7  1  0  0  0
  4  5  2  0  0  0
  4 22  1  0  0  0
  5  6  1  0  0  0
  5 23  1  0  0  0
  6 24  1  0  0  0
  7  8  2  0  0  0
  7 10  1  0  0  0
  8  9  1  0  0  0
  8 11  1  0  0  0
  9 25  1  0  0  0
 10 26  1  0  0  0
 10 27  1  0  0  0
 10 28  1  0  0  0
 11 12  1  0  0  0
 11 19  2  0  0  0
 12 13  1  0  0  0
 12 29  1  0  0  0
 13 18  1  0  0  0
 13 14  1  0  0  0
 13 30  1  0  0  0
 14 15  1  0  0  0
 14 31  1  0  0  0
 14 32  1  0  0  0
 15 16  1  0  0  0
 15 33  1  0  0  0
 15 34  1  0  0  0
 16 17  1  0  0  0
 16 20  1  0  0  0
 16 35  1  0  0  0
 17 18  1  0  0  0
 17 36  1  0  0  0
 17 37  1  0  0  0
 18 38  1  0  0  0
 18 39  1  0  0  0
 20 40  1  0  0  0
 20 41  1  0  0  0
 20 42  1  0  0  0
M  END
> <s_m_entry_id>
7686

> <s_m_entry_name>
entry

> <i_f3d_flags>
0

> <s_m_job_name>
adme_1000

> <r_psp_Prime_Energy>
-34940.0934189624

> <r_psp_Prime_Solv_GB>
-5198.94955733755

> <r_psp_Prime_Coulomb>
-26471.3860962541

> <r_psp_Prime_vdW>
-4523.4282978913

> <r_psp_Prime_Covalent>
4035.55233438093

> <i_psp_model_num>
0

> <r_psp_Prime_Lipo>
-2135.52983087533

> <s_psp_Prime_Energy_Force_Field>
OPLS3e

> <s_psp_Prime_Energy_Solvent_Model>
VSGB2.1

> <r_psp_Prime_Hbond>
-550.099436997451

> <r_psp_Prime_Packing>
-55.8446424272089

> <r_psp_Prime_SelfCont>
-40.4078915603482

> <r_psp_Memb1_x>
103.457542316003

> <r_psp_Memb1_y>
39.4731108300965

> <r_psp_Memb1_z>
48.7987221124676

> <r_psp_Memb2_x>
99.8134167309003

> <r_psp_Memb2_y>
2.81176945184187

> <r_psp_Memb2_z>
23.8404289603493

> <r_psp_MembDummyRadius>
4.45

> <r_psp_Prime_Bond_Covalent>
467.391595726917

> <r_psp_Prime_Bond_SGB>
49992.5416125273

> <r_psp_Prime_Angle_Covalent>
2226.73651540184

> <r_psp_Prime_Angle_SGB>
-21644.991180766

> <r_psp_Prime_Torsion_Covalent>
1341.42422325217

> <r_psp_Prime_NB14_LJ>
4077.06177763995

> <r_psp_Prime_NB14_Lipo>
0

> <r_psp_Prime_NB14_Elec>
25553.894182228

> <r_psp_Prime_NB14_SGB>
-15622.4839565682

> <r_psp_Prime_NBShort_LJ>
-8192.6845362353

> <r_psp_Prime_NBShort_Lipo>
-2135.52983087533

> <r_psp_Prime_NBShort_Elec>
-53044.1503602425

> <r_psp_Prime_NBShort_SGB>
18022.4225771233

> <r_psp_Prime_NBLong_LJ>
-407.80553929595

> <r_psp_Prime_NBLong_Lipo>
0

> <r_psp_Prime_NBLong_Elec>
1018.87008176037

> <r_psp_Prime_NBLong_SGB>
-1173.41095088228

> <r_psp_Prime_Self_SGB>
-34773.0276587716

> <s_m_Source_Path>
F:\Dekstop_files\DAC4,5\Molecular Systems Desgn and Engineering\supplementary_str

> <s_m_Source_File>
1000_str.mae

> <i_m_Source_File_Index>
610

> <i_lp_mmshare_version>
53156

> <s_epik_input>
W2NIXTFbY0hdW2NIXVtjSF1jKGMxMiljKFtDSDNdKWMoW25IXTIpQyg9TylbTkhdW0NASF0zW0NIMl1bQ0gyXVtDQEBIXShbQ0gzXSlbQ0gyXVtDSDJdMw==

> <s_epik_cmdline>
J2VwaWtfcHl0aG9uJywgJy1waHQnLCAnMC4wJywgJy1waCcsICc3LjAnLCAnLXRuJywgJzgnLCAnLW1hJywgJzUwMCcsICctaW1hZScsICc8aW5maWxlLm1hZT4nLCAnLW9tYWUnLCAnPG91dGZpbGUubWFlPic=

> <r_lp_tautomer_probability>
1

> <r_epik_Ionization_Penalty>
  0.0000

> <r_epik_Ionization_Penalty_Charging>
  0.0000

> <r_epik_Ionization_Penalty_Neutral>
  0.0000

> <r_epik_State_Penalty>
  0.0000

> <r_epik_Charging_Adjusted_Penalty>
0

> <i_epik_Tot_Q>
0

> <i_epik_Tot_abs_Q>
0

> <s_lp_Force_Field>
S-OPLS

> <r_lp_Energy>
34.883759

> <b_lp_Chiralities_Consistent>
1

> <s_lp_Variant>
GR-6-1

> <s_i_glide_gridfile>
glide-grid_1_oct_mmpl3_after_loop_refinement

> <i_i_glide_lignum>
5

> <i_i_glide_rotatable_bonds>
3

> <r_i_docking_score>
-8.28107915429687

> <r_i_glide_ligand_efficiency>
-0.414053957714844

> <r_i_glide_ligand_efficiency_sa>
-1.1239153559197

> <r_i_glide_ligand_efficiency_ln>
-2.07248098405034

> <r_glide_XP_GScore>
-8.28107915429687

> <r_i_glide_gscore>
-8.28107915429687

> <r_i_glide_evdw>
-38.5055694580078

> <r_i_glide_ecoul>
0.343457579612732

> <r_i_glide_energy>
-38.1621118783951

> <r_i_glide_einternal>
1.12708747386932

> <r_i_glide_emodel>
-51.5746150523322

> <r_glide_XP_HBond>
0

> <r_glide_XP_PhobEn>
-2.558668618425

> <r_glide_XP_PhobEnHB>
0

> <r_glide_XP_LowMW>
-0.5

> <r_glide_XP_RotPenal>
0.314570499084994

> <r_glide_XP_LipophilicEvdW>
-5.16511997899426

> <r_glide_XP_PhobEnPairHB>
0

> <r_glide_XP_Electro>
0.0257593184709549

> <r_glide_XP_Sitemap>
-0.4

> <r_glide_XP_Penalties>
0.00237962556643707

> <r_glide_XP_PiStack>
0

> <r_glide_XP_HBPenal>
0

> <r_glide_XP_ExposPenal>
0

> <r_glide_XP_PiCat>
0

> <r_glide_XP_ClBr>
0

> <r_glide_XP_Zpotr>
0

> <i_i_glide_confnum>
1

> <i_i_glide_posenum>
16

> <r_i_glide_eff_state_penalty>
0

> <i_glide_XP_PoseRank>
1

> <r_i_glide_rmsd_to_input>
108.769835942052

> <s_psp_Prime_MMGBSA_Input_Structure_Hash>
53091072d382a02838fa9506b469272e70f7a64cceb9d1c94b504db7

> <i_psp_number_heavy_atoms>
20

> <r_psp_MMGBSA_dG_Bind>
-42.4312590523768

> <r_psp_MMGBSA_dG_Bind_Coulomb>
1.65583630429319

> <r_psp_MMGBSA_dG_Bind_Covalent>
3.80475387179831

> <r_psp_MMGBSA_dG_Bind_Hbond>
-0.00183191427004203

> <r_psp_MMGBSA_dG_Bind_Lipo>
-20.4215069829561

> <r_psp_MMGBSA_dG_Bind_Packing>
4.9737991503207e-014

> <r_psp_MMGBSA_dG_Bind_SelfCont>
7.105427357601e-015

> <r_psp_MMGBSA_dG_Bind_Solv_GB>
15.6885138573562

> <r_psp_MMGBSA_dG_Bind_vdW>
-43.1570241886629

> <r_psp_Lig_Strain_Energy>
4.2093386922966

> <r_psp_Lig_Strain_Coulomb>
-0.238179945955224

> <r_psp_Lig_Strain_Covalent>
3.80495473990869

> <r_psp_Lig_Strain_Hbond>
0

> <r_psp_Lig_Strain_Lipo>
0.0385280810851725

> <r_psp_Lig_Strain_Packing>
0

> <r_psp_Lig_Strain_SelfCont>
0

> <r_psp_Lig_Strain_Solv_GB>
0.195344228079506

> <r_psp_Lig_Strain_vdW>
0.408691589178487

> <r_psp_Ligand_Energy>
16.084616880827

> <r_psp_Ligand_Coulomb>
-12.4035041323038

> <r_psp_Ligand_Covalent>
22.5922395399045

> <r_psp_Ligand_Hbond>
0

> <r_psp_Ligand_Lipo>
-1.6250957392896

> <r_psp_Ligand_Packing>
0

> <r_psp_Ligand_SelfCont>
0

> <r_psp_Ligand_Solv_GB>
-4.81373995689614

> <r_psp_Ligand_vdW>
12.3347171694121

> <r_psp_Complex_Energy>
-34940.0934189624

> <r_psp_Complex_Coulomb>
-26471.3860962541

> <r_psp_Complex_Covalent>
4035.55233438093

> <r_psp_Complex_Hbond>
-550.099436997451

> <r_psp_Complex_Lipo>
-2135.52983087533

> <r_psp_Complex_Packing>
-55.8446424272089

> <r_psp_Complex_SelfCont>
-40.4078915603482

> <r_psp_Complex_Solv_GB>
-5198.94955733755

> <r_psp_Complex_vdW>
-4523.4282978913

> <r_psp_Receptor_Energy>
-34913.7467767908

> <r_psp_Receptor_Coulomb>
-26460.6384284261

> <r_psp_Receptor_Covalent>
4009.15534096923

> <r_psp_Receptor_Hbond>
-550.097605083181

> <r_psp_Receptor_Lipo>
-2113.48322815308

> <r_psp_Receptor_Packing>
-55.8446424272089

> <r_psp_Receptor_SelfCont>
-40.4078915603482

> <r_psp_Receptor_Solv_GB>
-5209.82433123801

> <r_psp_Receptor_vdW>
-4492.60599087205

> <r_psp_MMGBSA_dG_Bind(NS)>
-46.6405977447212

> <r_psp_MMGBSA_dG_Bind(NS)_Coulomb>
1.89401625025857

> <r_psp_MMGBSA_dG_Bind(NS)_Covalent>
-0.000200868114461628

> <r_psp_MMGBSA_dG_Bind(NS)_Hbond>
-0.00183191426981466

> <r_psp_MMGBSA_dG_Bind(NS)_Lipo>
-20.4600350640385

> <r_psp_MMGBSA_dG_Bind(NS)_Packing>
0

> <r_psp_MMGBSA_dG_Bind(NS)_SelfCont>
0

> <r_psp_MMGBSA_dG_Bind(NS)_Solv_GB>
15.4931696292742

> <r_psp_MMGBSA_dG_Bind(NS)_vdW>
-43.565715777846

> <r_psp_Rec_Strain_Energy>
5.0931703299284e-011

> <r_psp_Rec_Strain_Coulomb>
-1.09139364212751e-011

> <r_psp_Rec_Strain_Covalent>
4.09272615797818e-012

> <r_psp_Rec_Strain_Hbond>
-2.27373675443232e-013

> <r_psp_Rec_Strain_Lipo>
-2.72848410531878e-012

> <r_psp_Rec_Strain_Packing>
4.9737991503207e-014

> <r_psp_Rec_Strain_SelfCont>
7.105427357601e-015

> <r_psp_Rec_Strain_Solv_GB>
2.72848410531878e-012

> <r_psp_Rec_Strain_vdW>
4.54747350886464e-012

> <r_psp_Prime_MMGBSA_ligand_efficiency>
-2.12156295261884

> <r_psp_Prime_MMGBSA_ligand_efficiency_sa>
-3.18234442892826

> <r_psp_Prime_MMGBSA_ligand_efficiency_ln>
-10.6191446642236

> <i_psp_ExecuteFunction_Internal_Entry_Index>
101

> <b_m_m_glide_XPvisualizer>
1

> <i_qp_#stars>
0

> <i_qp_#amine>
0

> <i_qp_#amidine>
0

> <i_qp_#acid>
0

> <i_qp_#amide>
0

> <i_qp_#rotor>
2

> <i_qp_#rtvFG>
0

> <i_qp_CNS>
1

> <r_qp_mol_MW>
   270.374

> <r_qp_dipole>
     5.989

> <r_qp_SASA>
   564.244

> <r_qp_FOSA>
   335.564

> <r_qp_FISA>
    44.683

> <r_qp_PISA>
   183.997

> <r_qp_WPSA>
     0.000

> <r_qp_volume>
   971.030

> <r_qp_donorHB>
     2.000

> <r_qp_accptHB>
     2.500

> <r_qp_dip^2/V>
   0.0369356

> <r_qp_ACxDN^.5/SA>
   0.0062660

> <r_qp_glob>
   0.8404654

> <r_qp_QPpolrz>
    33.180

> <r_qp_QPlogPC16>
     9.260

> <r_qp_QPlogPoct>
    15.116

> <r_qp_QPlogPw>
     7.583

> <r_qp_QPlogPo/w>
     3.997

> <r_qp_QPlogS>
    -5.098

> <r_qp_CIQPlogS>
    -4.074

> <r_qp_QPlogHERG>
    -4.991

> <r_qp_QPPCaco>
  3733.992

> <r_qp_QPlogBB>
     0.021

> <r_qp_QPPMDCK>
  2054.952

> <r_qp_QPlogKp>
    -1.503

> <r_qp_IP(eV)>
     8.330

> <r_qp_EA(eV)>
     0.384

> <i_qp_#metab>
1

> <r_qp_QPlogKhsa>
     0.585

> <i_qp_HumanOralAbsorption>
3

> <r_qp_PercentHumanOralAbsorption>
   100.000

> <r_qp_SAfluorine>
     0.000

> <r_qp_SAamideO>
     0.000

> <r_qp_PSA>
    46.307

> <i_qp_#NandO>
3

> <i_qp_RuleOfFive>
0

> <i_qp_RuleOfThree>
0

> <i_qp_#ringatoms>
15

> <i_qp_#in34>
0

> <i_qp_#in56>
15

> <i_qp_#noncon>
6

> <i_qp_#nonHatm>
20

> <r_qp_Jm>
0.06776046561743

> <s_m_subgroupid>
1000_str-imp1->adme_1000-out12

> <s_m_subgroup_title>
1000_str->adme_1000-out1

> <b_m_subgroup_collapsed>
0

$$$$
GR-13
                    3D
 Structure written by MMmdl.
 55 58  0  0  1  0            999 V2000
   -3.4425    1.7274   -0.3440 C   0  0  0  0  0  0
   -2.3805    0.8253   -0.2162 C   0  0  0  0  0  0
   -1.0356    1.2465   -0.0160 C   0  0  0  0  0  0
   -0.7723    2.6256    0.0577 C   0  0  0  0  0  0
   -1.8275    3.5279   -0.0650 C   0  0  0  0  0  0
   -3.1323    3.0848   -0.2620 C   0  0  0  0  0  0
   -0.2118    0.0665    0.0627 C   0  0  0  0  0  0
   -1.0745   -1.0308   -0.0627 C   0  0  0  0  0  0
   -2.3534   -0.5481   -0.2501 N   0  0  0  0  0  0
    1.2919    0.0732    0.2675 C   0  0  0  0  0  0
    1.9495   -0.0807   -1.1111 N   0  3  0  0  0  0
   -0.7437   -2.4426   -0.0924 C   0  0  0  0  0  0
   -1.7890   -3.2798    0.0684 N   0  0  0  0  0  0
   -1.7162   -4.7421    0.1043 C   0  0  0  0  0  0
   -1.0155   -5.3292    1.3593 C   0  0  0  0  0  0
   -1.0097   -6.8699    1.4039 C   0  0  0  0  0  0
   -2.4094   -7.4658    1.1850 C   0  0  0  0  0  0
   -3.0298   -6.9592   -0.1269 C   0  0  0  0  0  0
   -3.0758   -5.4199   -0.1933 C   0  0  0  0  0  0
    0.4149   -2.8266   -0.2606 O   0  0  0  0  0  0
    4.0880   -0.3543   -2.4512 C   0  0  0  0  0  0
    4.2388   -1.6411   -2.9756 C   0  0  0  0  0  0
    4.8029   -1.8154   -4.2366 C   0  0  0  0  0  0
    5.2204   -0.7036   -4.9654 C   0  0  0  0  0  0
    5.0811    0.5810   -4.4440 C   0  0  0  0  0  0
    4.5168    0.7565   -3.1830 C   0  0  0  0  0  0
    3.4818   -0.1668   -1.0716 C   0  0  0  0  0  0
   -4.4595    1.3976   -0.4977 H   0  0  0  0  0  0
    0.2331    2.9899    0.2086 H   0  0  0  0  0  0
   -1.6303    4.5886   -0.0068 H   0  0  0  0  0  0
   -3.9255    3.8126   -0.3539 H   0  0  0  0  0  0
   -3.1408   -1.1644   -0.3899 H   0  0  0  0  0  0
    1.6853    1.0035    0.6793 H   0  0  0  0  0  0
    1.6601   -0.7664    0.8586 H   0  0  0  0  0  0
   -2.6891   -2.8822    0.2925 H   0  0  0  0  0  0
   -1.0855   -5.0372   -0.7385 H   0  0  0  0  0  0
    0.0121   -4.9698    1.4269 H   0  0  0  0  0  0
   -1.5337   -4.9709    2.2503 H   0  0  0  0  0  0
   -0.3317   -7.2501    0.6381 H   0  0  0  0  0  0
   -0.6072   -7.2106    2.3588 H   0  0  0  0  0  0
   -2.3524   -8.5549    1.1733 H   0  0  0  0  0  0
   -3.0560   -7.2022    2.0234 H   0  0  0  0  0  0
   -2.4520   -7.3399   -0.9706 H   0  0  0  0  0  0
   -4.0357   -7.3649   -0.2421 H   0  0  0  0  0  0
   -3.8080   -5.0782    0.5402 H   0  0  0  0  0  0
   -3.4435   -5.1136   -1.1739 H   0  0  0  0  0  0
    3.9161   -2.5043   -2.4112 H   0  0  0  0  0  0
    4.9167   -2.8079   -4.6474 H   0  0  0  0  0  0
    5.6580   -0.8391   -5.9436 H   0  0  0  0  0  0
    5.4105    1.4366   -5.0152 H   0  0  0  0  0  0
    4.4116    1.7532   -2.7796 H   0  0  0  0  0  0
    3.8078    0.7595   -0.5950 H   0  0  0  0  0  0
    3.7036   -1.0067   -0.4104 H   0  0  0  0  0  0
    1.5954   -0.9247   -1.5393 H   0  0  0  0  0  0
    1.6801    0.6995   -1.6931 H   0  0  0  0  0  0
  1  2  1  0  0  0
  1  6  2  0  0  0
  1 28  1  0  0  0
  2  3  2  0  0  0
  2  9  1  0  0  0
  3  4  1  0  0  0
  3  7  1  0  0  0
  4  5  2  0  0  0
  4 29  1  0  0  0
  5  6  1  0  0  0
  5 30  1  0  0  0
  6 31  1  0  0  0
  7  8  2  0  0  0
  7 10  1  0  0  0
  8  9  1  0  0  0
  8 12  1  0  0  0
  9 32  1  0  0  0
 10 11  1  0  0  0
 10 33  1  0  0  0
 10 34  1  0  0  0
 11 27  1  0  0  0
 11 54  1  0  0  0
 11 55  1  0  0  0
 12 13  1  0  0  0
 12 20  2  0  0  0
 13 14  1  0  0  0
 13 35  1  0  0  0
 14 19  1  0  0  0
 14 15  1  0  0  0
 14 36  1  0  0  0
 15 16  1  0  0  0
 15 37  1  0  0  0
 15 38  1  0  0  0
 16 17  1  0  0  0
 16 39  1  0  0  0
 16 40  1  0  0  0
 17 18  1  0  0  0
 17 41  1  0  0  0
 17 42  1  0  0  0
 18 19  1  0  0  0
 18 43  1  0  0  0
 18 44  1  0  0  0
 19 45  1  0  0  0
 19 46  1  0  0  0
 21 26  1  0  0  0
 21 22  2  0  0  0
 21 27  1  0  0  0
 22 23  1  0  0  0
 22 47  1  0  0  0
 23 24  2  0  0  0
 23 48  1  0  0  0
 24 25  1  0  0  0
 24 49  1  0  0  0
 25 26  2  0  0  0
 25 50  1  0  0  0
 26 51  1  0  0  0
 27 52  1  0  0  0
 27 53  1  0  0  0
M  CHG  1  11   1
M  END
> <s_m_entry_id>
7938

> <s_m_entry_name>
entry

> <i_f3d_flags>
0

> <s_m_job_name>
adme_1000

> <r_psp_Prime_Energy>
-34941.2653607464

> <r_psp_Prime_Solv_GB>
-5265.24738041892

> <r_psp_Prime_Coulomb>
-26398.0472781083

> <r_psp_Prime_vdW>
-4521.70294301224

> <r_psp_Prime_Covalent>
4038.6333305019

> <i_psp_model_num>
0

> <r_psp_Prime_Lipo>
-2148.55084217334

> <s_psp_Prime_Energy_Force_Field>
OPLS3e

> <s_psp_Prime_Energy_Solvent_Model>
VSGB2.1

> <r_psp_Prime_Hbond>
-550.097713489002

> <r_psp_Prime_Packing>
-55.8446424860814

> <r_psp_Prime_SelfCont>
-40.4078915603482

> <r_psp_Memb1_x>
103.457542316003

> <r_psp_Memb1_y>
39.4731108300965

> <r_psp_Memb1_z>
48.7987221124676

> <r_psp_Memb2_x>
99.8134167309003

> <r_psp_Memb2_y>
2.81176945184187

> <r_psp_Memb2_z>
23.8404289603493

> <r_psp_MembDummyRadius>
4.45

> <r_psp_Prime_Bond_Covalent>
467.641325616836

> <r_psp_Prime_Bond_SGB>
49977.9220808417

> <r_psp_Prime_Angle_Covalent>
2227.12565768845

> <r_psp_Prime_Angle_SGB>
-21641.3300360498

> <r_psp_Prime_Torsion_Covalent>
1343.86634719662

> <r_psp_Prime_NB14_LJ>
4086.28032789227

> <r_psp_Prime_NB14_Lipo>
0

> <r_psp_Prime_NB14_Elec>
25565.5703872017

> <r_psp_Prime_NB14_SGB>
-15608.064124936

> <r_psp_Prime_NBShort_LJ>
-8200.46696107385

> <r_psp_Prime_NBShort_Lipo>
-2148.55084217334

> <r_psp_Prime_NBShort_Elec>
-53034.0109233894

> <r_psp_Prime_NBShort_SGB>
17993.9414475049

> <r_psp_Prime_NBLong_LJ>
-407.516309830665

> <r_psp_Prime_NBLong_Lipo>
0

> <r_psp_Prime_NBLong_Elec>
1070.39325807938

> <r_psp_Prime_NBLong_SGB>
-1223.60714532714

> <r_psp_Prime_Self_SGB>
-34764.1096024525

> <s_m_Source_Path>
F:\Dekstop_files\DAC4,5\Molecular Systems Desgn and Engineering\supplementary_str

> <s_m_Source_File>
1000_str.mae

> <i_m_Source_File_Index>
862

> <i_lp_mmshare_version>
53156

> <s_epik_input>
W2NIXTFbY0hdW2NIXVtjSF1bY0hdYzFbQ0gyXVtOSF1bQ0gyXWMoYyhjMjMpW2NIXVtjSF1bY0hdW2NIXTIpYyhbbkhdMylDKD1PKVtOSF1bQ0hdNFtDSDJdW0NIMl1bQ0gyXVtDSDJdW0NIMl00

> <s_epik_cmdline>
J2VwaWtfcHl0aG9uJywgJy1waHQnLCAnMC4wJywgJy1waCcsICc3LjAnLCAnLXRuJywgJzgnLCAnLW1hJywgJzUwMCcsICctaW1hZScsICc8aW5maWxlLm1hZT4nLCAnLW9tYWUnLCAnPG91dGZpbGUubWFlPic=

> <r_epik_Ionization_Penalty>
  0.0879

> <r_epik_Ionization_Penalty_Charging>
  0.0879

> <r_epik_Ionization_Penalty_Neutral>
  0.0000

> <r_epik_State_Penalty>
  0.0783

> <r_epik_Charging_Adjusted_Penalty>
0.16621511207091

> <i_epik_Tot_Q>
1

> <i_epik_Tot_abs_Q>
1

> <s_lp_Force_Field>
S-OPLS

> <r_lp_Energy>
42.990421

> <b_lp_Chiralities_Consistent>
1

> <s_lp_Variant>
GR-13-1

> <s_i_glide_gridfile>
glide-grid_1_oct_mmpl3_after_loop_refinement

> <i_i_glide_lignum>
9

> <i_i_glide_rotatable_bonds>
7

> <r_i_docking_score>
-7.76957408746862

> <r_i_glide_ligand_efficiency>
-0.287762003239579

> <r_i_glide_ligand_efficiency_sa>
-0.863286008770319

> <r_i_glide_ligand_efficiency_ln>
-1.80862875612297

> <r_glide_XP_GScore>
-7.84787408746862

> <r_i_glide_gscore>
-7.84787408746862

> <r_i_glide_evdw>
-39.7540130615234

> <r_i_glide_ecoul>
-0.679929196834564

> <r_i_glide_energy>
-40.433942258358

> <r_i_glide_einternal>
3.87872505187988

> <r_i_glide_emodel>
-67.6460815089524

> <r_glide_XP_HBond>
0

> <r_glide_XP_PhobEn>
-2.7

> <r_glide_XP_PhobEnHB>
0

> <r_glide_XP_LowMW>
-0.291706933333333

> <r_glide_XP_RotPenal>
0.375791225104382

> <r_glide_XP_LipophilicEvdW>
-7.81045822621872

> <r_glide_XP_PhobEnPairHB>
0

> <r_glide_XP_Electro>
-0.0509946897625923

> <r_glide_XP_Sitemap>
-0.370523308557514

> <r_glide_XP_Penalties>
3.00001784529916

> <r_glide_XP_PiStack>
0

> <r_glide_XP_HBPenal>
0

> <r_glide_XP_ExposPenal>
0

> <r_glide_XP_PiCat>
0

> <r_glide_XP_ClBr>
0

> <r_glide_XP_Zpotr>
0

> <i_i_glide_confnum>
1

> <i_i_glide_posenum>
143

> <r_i_glide_eff_state_penalty>
0.0783

> <i_glide_XP_PoseRank>
1

> <r_i_glide_rmsd_to_input>
112.060859802965

> <s_psp_Prime_MMGBSA_Input_Structure_Hash>
91f734e1470177f158abe91f43157466a8fb2f0708555109d2a279f9

> <i_psp_number_heavy_atoms>
27

> <r_psp_MMGBSA_dG_Bind>
-53.066610691305

> <r_psp_MMGBSA_dG_Bind_Coulomb>
50.9026557964862

> <r_psp_MMGBSA_dG_Bind_Covalent>
5.73445893146845

> <r_psp_MMGBSA_dG_Bind_Hbond>
-0.000108405820924418

> <r_psp_MMGBSA_dG_Bind_Lipo>
-31.1075415158225

> <r_psp_MMGBSA_dG_Bind_Packing>
-5.88725299621728e-008

> <r_psp_MMGBSA_dG_Bind_SelfCont>
7.105427357601e-015

> <r_psp_MMGBSA_dG_Bind_Solv_GB>
-33.570793602561

> <r_psp_MMGBSA_dG_Bind_vdW>
-45.0252818362369

> <r_psp_Lig_Strain_Energy>
7.62949959741863

> <r_psp_Lig_Strain_Coulomb>
-2.76298566017301

> <r_psp_Lig_Strain_Covalent>
5.73465979958044

> <r_psp_Lig_Strain_Hbond>
0

> <r_psp_Lig_Strain_Lipo>
0.828733994349824

> <r_psp_Lig_Strain_Packing>
0

> <r_psp_Lig_Strain_SelfCont>
0

> <r_psp_Lig_Strain_Solv_GB>
1.29511070942195

> <r_psp_Lig_Strain_vdW>
2.53398075423941

> <r_psp_Ligand_Energy>
25.5480267357545

> <r_psp_Ligand_Coulomb>
11.6884945213015

> <r_psp_Ligand_Covalent>
23.7435306012028

> <r_psp_Ligand_Hbond>
0

> <r_psp_Ligand_Lipo>
-3.96007250444013

> <r_psp_Ligand_Packing>
0

> <r_psp_Ligand_SelfCont>
0

> <r_psp_Ligand_Solv_GB>
-21.8522555783537

> <r_psp_Ligand_vdW>
15.928329696044

> <r_psp_Complex_Energy>
-34941.2653607464

> <r_psp_Complex_Coulomb>
-26398.0472781083

> <r_psp_Complex_Covalent>
4038.6333305019

> <r_psp_Complex_Hbond>
-550.097713489002

> <r_psp_Complex_Lipo>
-2148.55084217334

> <r_psp_Complex_Packing>
-55.8446424860814

> <r_psp_Complex_SelfCont>
-40.4078915603482

> <r_psp_Complex_Solv_GB>
-5265.24738041892

> <r_psp_Complex_vdW>
-4521.70294301224

> <r_psp_Receptor_Energy>
-34913.7467767908

> <r_psp_Receptor_Coulomb>
-26460.6384284261

> <r_psp_Receptor_Covalent>
4009.15534096923

> <r_psp_Receptor_Hbond>
-550.097605083181

> <r_psp_Receptor_Lipo>
-2113.48322815308

> <r_psp_Receptor_Packing>
-55.8446424272089

> <r_psp_Receptor_SelfCont>
-40.4078915603482

> <r_psp_Receptor_Solv_GB>
-5209.82433123801

> <r_psp_Receptor_vdW>
-4492.60599087205

> <r_psp_MMGBSA_dG_Bind(NS)>
-60.6961102887726

> <r_psp_MMGBSA_dG_Bind(NS)_Coulomb>
53.6656414566714

> <r_psp_MMGBSA_dG_Bind(NS)_Covalent>
-0.00020086811582587

> <r_psp_MMGBSA_dG_Bind(NS)_Hbond>
-0.000108405820697044

> <r_psp_MMGBSA_dG_Bind(NS)_Lipo>
-31.9362755101697

> <r_psp_MMGBSA_dG_Bind(NS)_Packing>
-5.88725797001644e-008

> <r_psp_MMGBSA_dG_Bind(NS)_SelfCont>
0

> <r_psp_MMGBSA_dG_Bind(NS)_Solv_GB>
-34.865904311986

> <r_psp_MMGBSA_dG_Bind(NS)_vdW>
-47.559262590481

> <r_psp_Rec_Strain_Energy>
5.0931703299284e-011

> <r_psp_Rec_Strain_Coulomb>
-1.09139364212751e-011

> <r_psp_Rec_Strain_Covalent>
4.09272615797818e-012

> <r_psp_Rec_Strain_Hbond>
-2.27373675443232e-013

> <r_psp_Rec_Strain_Lipo>
-2.72848410531878e-012

> <r_psp_Rec_Strain_Packing>
4.9737991503207e-014

> <r_psp_Rec_Strain_SelfCont>
7.105427357601e-015

> <r_psp_Rec_Strain_Solv_GB>
2.72848410531878e-012

> <r_psp_Rec_Strain_vdW>
4.54747350886464e-012

> <r_psp_Prime_MMGBSA_ligand_efficiency>
-1.96543002560389

> <r_psp_Prime_MMGBSA_ligand_efficiency_sa>
-2.94814503840583

> <r_psp_Prime_MMGBSA_ligand_efficiency_ln>
-12.3530320974836

> <i_psp_ExecuteFunction_Internal_Entry_Index>
143

> <b_m_m_glide_XPvisualizer>
1

> <i_qp_#stars>
0

> <i_qp_#amine>
1

> <i_qp_#amidine>
0

> <i_qp_#acid>
0

> <i_qp_#amide>
0

> <i_qp_#rotor>
6

> <i_qp_#rtvFG>
0

> <i_qp_CNS>
1

> <r_qp_mol_MW>
   361.486

> <r_qp_dipole>
     6.173

> <r_qp_SASA>
   727.108

> <r_qp_FOSA>
   298.527

> <r_qp_FISA>
    49.197

> <r_qp_PISA>
   379.384

> <r_qp_WPSA>
     0.000

> <r_qp_volume>
  1264.736

> <r_qp_donorHB>
     3.000

> <r_qp_accptHB>
     4.000

> <r_qp_dip^2/V>
   0.0301326

> <r_qp_ACxDN^.5/SA>
   0.0095284

> <r_qp_glob>
   0.7778562

> <r_qp_QPpolrz>
    44.231

> <r_qp_QPlogPC16>
    13.777

> <r_qp_QPlogPoct>
    21.186

> <r_qp_QPlogPw>
    11.395

> <r_qp_QPlogPo/w>
     4.698

> <r_qp_QPlogS>
    -5.453

> <r_qp_CIQPlogS>
    -4.568

> <r_qp_QPlogHERG>
    -7.662

> <r_qp_QPPCaco>
   843.844

> <r_qp_QPlogBB>
     0.058

> <r_qp_QPPMDCK>
   455.541

> <r_qp_QPlogKp>
    -2.576

> <r_qp_IP(eV)>
     8.410

> <r_qp_EA(eV)>
     0.416

> <i_qp_#metab>
3

> <r_qp_QPlogKhsa>
     0.824

> <i_qp_HumanOralAbsorption>
3

> <r_qp_PercentHumanOralAbsorption>
   100.000

> <r_qp_SAfluorine>
     0.000

> <r_qp_SAamideO>
     0.000

> <r_qp_PSA>
    61.680

> <i_qp_#NandO>
4

> <i_qp_RuleOfFive>
0

> <i_qp_RuleOfThree>
0

> <i_qp_#ringatoms>
21

> <i_qp_#in34>
0

> <i_qp_#in56>
21

> <i_qp_#noncon>
6

> <i_qp_#nonHatm>
27

> <r_qp_Jm>
0.00338019155425328

> <s_m_subgroupid>
1000_str-imp1->adme_1000-out12

> <s_m_subgroup_title>
1000_str->adme_1000-out1

> <b_m_subgroup_collapsed>
0

$$$$
GR-14
                    3D
 Structure written by MMmdl.
 49 51  0  0  1  0            999 V2000
   -3.3457    1.6891   -0.1121 C   0  0  0  0  0  0
   -2.2736    0.7899   -0.0960 C   0  0  0  0  0  0
   -0.9190    1.2132    0.0141 C   0  0  0  0  0  0
   -0.6557    2.5908    0.1095 C   0  0  0  0  0  0
   -1.7205    3.4901    0.0954 C   0  0  0  0  0  0
   -3.0350    3.0453   -0.0128 C   0  0  0  0  0  0
   -0.0872    0.0366   -0.0043 C   0  0  0  0  0  0
   -0.9519   -1.0616   -0.1050 C   0  0  0  0  0  0
   -2.2435   -0.5816   -0.1772 N   0  0  0  0  0  0
    1.4269    0.0473    0.0964 C   0  0  0  0  0  0
    1.9952   -0.0184   -1.3303 N   0  3  0  0  0  0
   -0.6167   -2.4686   -0.2127 C   0  0  0  0  0  0
   -1.6399   -3.3216    0.0002 N   0  0  0  0  0  0
   -1.5633   -4.7831   -0.0678 C   0  0  0  0  0  0
   -2.7301   -5.4865    0.6674 C   0  0  0  0  0  0
   -2.6743   -7.0253    0.5890 C   0  0  0  0  0  0
   -2.5097   -7.5306   -0.8535 C   0  0  0  0  0  0
   -1.2776   -6.9036   -1.5249 C   0  0  0  0  0  0
   -1.3118   -5.3632   -1.4859 C   0  0  0  0  0  0
    0.5313   -2.8357   -0.4693 O   0  0  0  0  0  0
    3.5288   -0.0702   -1.4082 C   0  0  0  0  0  0
    4.1110   -1.3625   -0.8682 C   0  0  0  0  0  0
    4.8986   -1.4511    0.2150 C   0  0  0  0  0  0
   -4.3707    1.3583   -0.1963 H   0  0  0  0  0  0
    0.3571    2.9565    0.1936 H   0  0  0  0  0  0
   -1.5233    4.5498    0.1697 H   0  0  0  0  0  0
   -3.8355    3.7709   -0.0201 H   0  0  0  0  0  0
   -3.0369   -1.1978   -0.2776 H   0  0  0  0  0  0
    1.8392    0.9570    0.5350 H   0  0  0  0  0  0
    1.8363   -0.8181    0.6180 H   0  0  0  0  0  0
   -2.5615   -2.9387    0.1491 H   0  0  0  0  0  0
   -0.6790   -5.0631    0.5106 H   0  0  0  0  0  0
   -2.7547   -5.1808    1.7145 H   0  0  0  0  0  0
   -3.6729   -5.1646    0.2221 H   0  0  0  0  0  0
   -1.8419   -7.3869    1.1948 H   0  0  0  0  0  0
   -3.5762   -7.4516    1.0304 H   0  0  0  0  0  0
   -2.4233   -8.6178   -0.8595 H   0  0  0  0  0  0
   -3.4040   -7.2923   -1.4313 H   0  0  0  0  0  0
   -0.3750   -7.2562   -1.0234 H   0  0  0  0  0  0
   -1.2025   -7.2466   -2.5575 H   0  0  0  0  0  0
   -2.1098   -5.0271   -2.1499 H   0  0  0  0  0  0
   -0.3780   -4.9791   -1.8981 H   0  0  0  0  0  0
    3.7531    0.0412   -2.4695 H   0  0  0  0  0  0
    3.8784    0.8136   -0.8715 H   0  0  0  0  0  0
    3.8660   -2.2625   -1.4144 H   0  0  0  0  0  0
    5.1702   -0.5759    0.7874 H   0  0  0  0  0  0
    5.2834   -2.4051    0.5448 H   0  0  0  0  0  0
    1.6232   -0.8379   -1.7895 H   0  0  0  0  0  0
    1.6730    0.7929   -1.8383 H   0  0  0  0  0  0
  1  2  2  0  0  0
  1  6  1  0  0  0
  1 24  1  0  0  0
  2  3  1  0  0  0
  2  9  1  0  0  0
  3  4  2  0  0  0
  3  7  1  0  0  0
  4  5  1  0  0  0
  4 25  1  0  0  0
  5  6  2  0  0  0
  5 26  1  0  0  0
  6 27  1  0  0  0
  7  8  2  0  0  0
  7 10  1  0  0  0
  8  9  1  0  0  0
  8 12  1  0  0  0
  9 28  1  0  0  0
 10 11  1  0  0  0
 10 29  1  0  0  0
 10 30  1  0  0  0
 11 21  1  0  0  0
 11 48  1  0  0  0
 11 49  1  0  0  0
 12 13  1  0  0  0
 12 20  2  0  0  0
 13 14  1  0  0  0
 13 31  1  0  0  0
 14 15  1  0  0  0
 14 19  1  0  0  0
 14 32  1  0  0  0
 15 16  1  0  0  0
 15 33  1  0  0  0
 15 34  1  0  0  0
 16 17  1  0  0  0
 16 35  1  0  0  0
 16 36  1  0  0  0
 17 18  1  0  0  0
 17 37  1  0  0  0
 17 38  1  0  0  0
 18 19  1  0  0  0
 18 39  1  0  0  0
 18 40  1  0  0  0
 19 41  1  0  0  0
 19 42  1  0  0  0
 21 22  1  0  0  0
 21 43  1  0  0  0
 21 44  1  0  0  0
 22 23  2  0  0  0
 22 45  1  0  0  0
 23 46  1  0  0  0
 23 47  1  0  0  0
M  CHG  1  11   1
M  END
> <s_m_entry_id>
7500

> <s_m_entry_name>
entry

> <i_f3d_flags>
0

> <s_m_job_name>
adme_1000

> <r_psp_Prime_Energy>
-34944.2198335958

> <r_psp_Prime_Solv_GB>
-5282.82617861472

> <r_psp_Prime_Coulomb>
-26386.2173075582

> <r_psp_Prime_vdW>
-4525.31726159965

> <r_psp_Prime_Covalent>
4037.29151439382

> <i_psp_model_num>
0

> <r_psp_Prime_Lipo>
-2138.35066718779

> <s_psp_Prime_Energy_Force_Field>
OPLS3e

> <s_psp_Prime_Energy_Solvent_Model>
VSGB2.1

> <r_psp_Prime_Hbond>
-550.816287799627

> <r_psp_Prime_Packing>
-57.5757536692337

> <r_psp_Prime_SelfCont>
-40.4078915603482

> <r_psp_Memb1_x>
103.457542316003

> <r_psp_Memb1_y>
39.4731108300965

> <r_psp_Memb1_z>
48.7987221124676

> <r_psp_Memb2_x>
99.8134167309003

> <r_psp_Memb2_y>
2.81176945184187

> <r_psp_Memb2_z>
23.8404289603493

> <r_psp_MembDummyRadius>
4.45

> <r_psp_Prime_Bond_Covalent>
467.693876796887

> <r_psp_Prime_Bond_SGB>
49985.9622949943

> <r_psp_Prime_Angle_Covalent>
2225.42116086852

> <r_psp_Prime_Angle_SGB>
-21642.0777847109

> <r_psp_Prime_Torsion_Covalent>
1344.17647672841

> <r_psp_Prime_NB14_LJ>
4077.61900223664

> <r_psp_Prime_NB14_Lipo>
0

> <r_psp_Prime_NB14_Elec>
25568.854941233

> <r_psp_Prime_NB14_SGB>
-15617.3088797961

> <r_psp_Prime_NBShort_LJ>
-8195.53879905393

> <r_psp_Prime_NBShort_Lipo>
-2138.35066718779

> <r_psp_Prime_NBShort_Elec>
-53017.5499859173

> <r_psp_Prime_NBShort_SGB>
17983.232859351

> <r_psp_Prime_NBLong_LJ>
-407.397464782362

> <r_psp_Prime_NBLong_Lipo>
0

> <r_psp_Prime_NBLong_Elec>
1062.47773712613

> <r_psp_Prime_NBLong_SGB>
-1223.27417192178

> <r_psp_Prime_Self_SGB>
-34769.3604965312

> <s_m_Source_Path>
F:\Dekstop_files\DAC4,5\Molecular Systems Desgn and Engineering\supplementary_str

> <s_m_Source_File>
1000_str.mae

> <i_m_Source_File_Index>
424

> <i_lp_mmshare_version>
53156

> <s_epik_input>
W2NIXTFbY0hdW2NIXVtjSF1jKGMxMiljKFtDSDJdW05IXVtDSDJdW0NIXT1bQ0gyXSljKFtuSF0yKUMoPU8pW05IXVtDSF0zW0NIMl1bQ0gyXVtDSDJdW0NIMl1bQ0gyXTM=

> <s_epik_cmdline>
J2VwaWtfcHl0aG9uJywgJy1waHQnLCAnMC4wJywgJy1waCcsICc3LjAnLCAnLXRuJywgJzgnLCAnLW1hJywgJzUwMCcsICctaW1hZScsICc8aW5maWxlLm1hZT4nLCAnLW9tYWUnLCAnPG91dGZpbGUubWFlPic=

> <r_lp_tautomer_probability>
1

> <r_epik_Ionization_Penalty>
  0.0104

> <r_epik_Ionization_Penalty_Charging>
  0.0104

> <r_epik_Ionization_Penalty_Neutral>
  0.0000

> <r_epik_State_Penalty>
  0.0000

> <r_epik_Charging_Adjusted_Penalty>
0.0103731484996252

> <i_epik_Tot_Q>
1

> <i_epik_Tot_abs_Q>
1

> <s_lp_Force_Field>
S-OPLS

> <r_lp_Energy>
34.033231

> <b_lp_Chiralities_Consistent>
1

> <s_lp_Variant>
GR-14-1

> <s_i_glide_gridfile>
glide-grid_1_oct_mmpl3_after_loop_refinement

> <i_i_glide_lignum>
10

> <i_i_glide_rotatable_bonds>
7

> <r_i_docking_score>
-10.3235655618801

> <r_i_glide_ligand_efficiency>
-0.448850676603482

> <r_i_glide_ligand_efficiency_sa>
-1.27647161674255

> <r_i_glide_ligand_efficiency_ln>
-2.49633176177968

> <r_glide_XP_GScore>
-10.3235655618801

> <r_i_glide_gscore>
-10.3235655618801

> <r_i_glide_evdw>
-37.5262718200684

> <r_i_glide_ecoul>
-1.23227953910828

> <r_i_glide_energy>
-38.7585513591766

> <r_i_glide_einternal>
7.89662170410156

> <r_i_glide_emodel>
-48.6347114390998

> <r_glide_XP_HBond>
-0.238457394914232

> <r_glide_XP_PhobEn>
-2.08757023506589

> <r_glide_XP_PhobEnHB>
0

> <r_glide_XP_LowMW>
-0.4585692

> <r_glide_XP_RotPenal>
0.399286177554751

> <r_glide_XP_LipophilicEvdW>
-6.242253329208

> <r_glide_XP_PhobEnPairHB>
0

> <r_glide_XP_Electro>
-1.39242096543312

> <r_glide_XP_Sitemap>
-0.303711861703507

> <r_glide_XP_Penalties>
0.000131246889906304

> <r_glide_XP_PiStack>
0

> <r_glide_XP_HBPenal>
0

> <r_glide_XP_ExposPenal>
0

> <r_glide_XP_PiCat>
0

> <r_glide_XP_ClBr>
0

> <r_glide_XP_Zpotr>
0

> <i_i_glide_confnum>
1

> <i_i_glide_posenum>
2

> <r_i_glide_eff_state_penalty>
0

> <i_glide_XP_PoseRank>
1

> <r_i_glide_rmsd_to_input>
108.746103572228

> <s_psp_Prime_MMGBSA_Input_Structure_Hash>
2267a8844768fd95e901849ccd37bccad9d06b8deaec8e1157becd94

> <i_psp_number_heavy_atoms>
23

> <r_psp_MMGBSA_dG_Bind>
-52.3151266743371

> <r_psp_MMGBSA_dG_Bind_Coulomb>
60.5520855740797

> <r_psp_MMGBSA_dG_Bind_Covalent>
7.76950412008136

> <r_psp_MMGBSA_dG_Bind_Hbond>
-0.718682716446324

> <r_psp_MMGBSA_dG_Bind_Lipo>
-23.2453924584042

> <r_psp_MMGBSA_dG_Bind_Packing>
-1.73111124202475

> <r_psp_MMGBSA_dG_Bind_SelfCont>
7.105427357601e-015

> <r_psp_MMGBSA_dG_Bind_Solv_GB>
-51.7757363624169

> <r_psp_MMGBSA_dG_Bind_vdW>
-43.1657935892708

> <r_psp_Lig_Strain_Energy>
9.70231534151601

> <r_psp_Lig_Strain_Coulomb>
-0.3770415519243

> <r_psp_Lig_Strain_Covalent>
7.76970498819168

> <r_psp_Lig_Strain_Hbond>
0

> <r_psp_Lig_Strain_Lipo>
-0.322908796272788

> <r_psp_Lig_Strain_Packing>
0

> <r_psp_Lig_Strain_SelfCont>
0

> <r_psp_Lig_Strain_Solv_GB>
-0.263946354324787

> <r_psp_Lig_Strain_vdW>
2.89650705584616

> <r_psp_Ligand_Energy>
21.8420698693838

> <r_psp_Ligand_Coulomb>
13.8690352938065

> <r_psp_Ligand_Covalent>
20.3666693045049

> <r_psp_Ligand_Hbond>
0

> <r_psp_Ligand_Lipo>
-1.62204657630426

> <r_psp_Ligand_Packing>
0

> <r_psp_Ligand_SelfCont>
0

> <r_psp_Ligand_Solv_GB>
-21.2261110142965

> <r_psp_Ligand_vdW>
10.4545228616732

> <r_psp_Complex_Energy>
-34944.2198335958

> <r_psp_Complex_Coulomb>
-26386.2173075582

> <r_psp_Complex_Covalent>
4037.29151439382

> <r_psp_Complex_Hbond>
-550.816287799627

> <r_psp_Complex_Lipo>
-2138.35066718779

> <r_psp_Complex_Packing>
-57.5757536692337

> <r_psp_Complex_SelfCont>
-40.4078915603482

> <r_psp_Complex_Solv_GB>
-5282.82617861472

> <r_psp_Complex_vdW>
-4525.31726159965

> <r_psp_Receptor_Energy>
-34913.7467767908

> <r_psp_Receptor_Coulomb>
-26460.6384284261

> <r_psp_Receptor_Covalent>
4009.15534096923

> <r_psp_Receptor_Hbond>
-550.097605083181

> <r_psp_Receptor_Lipo>
-2113.48322815308

> <r_psp_Receptor_Packing>
-55.8446424272089

> <r_psp_Receptor_SelfCont>
-40.4078915603482

> <r_psp_Receptor_Solv_GB>
-5209.82433123801

> <r_psp_Receptor_vdW>
-4492.60599087205

> <r_psp_MMGBSA_dG_Bind(NS)>
-62.0174420159092

> <r_psp_MMGBSA_dG_Bind(NS)_Coulomb>
60.9291271260154

> <r_psp_MMGBSA_dG_Bind(NS)_Covalent>
-0.000200868114461628

> <r_psp_MMGBSA_dG_Bind(NS)_Hbond>
-0.718682716446096

> <r_psp_MMGBSA_dG_Bind(NS)_Lipo>
-22.9224836621288

> <r_psp_MMGBSA_dG_Bind(NS)_Packing>
-1.7311112420248

> <r_psp_MMGBSA_dG_Bind(NS)_SelfCont>
0

> <r_psp_MMGBSA_dG_Bind(NS)_Solv_GB>
-51.511790008095

> <r_psp_MMGBSA_dG_Bind(NS)_vdW>
-46.0623006451215

> <r_psp_Rec_Strain_Energy>
5.0931703299284e-011

> <r_psp_Rec_Strain_Coulomb>
-1.09139364212751e-011

> <r_psp_Rec_Strain_Covalent>
4.09272615797818e-012

> <r_psp_Rec_Strain_Hbond>
-2.27373675443232e-013

> <r_psp_Rec_Strain_Lipo>
-2.72848410531878e-012

> <r_psp_Rec_Strain_Packing>
4.9737991503207e-014

> <r_psp_Rec_Strain_SelfCont>
7.105427357601e-015

> <r_psp_Rec_Strain_Solv_GB>
2.72848410531878e-012

> <r_psp_Rec_Strain_vdW>
4.54747350886464e-012

> <r_psp_Prime_MMGBSA_ligand_efficiency>
-2.27457072497118

> <r_psp_Prime_MMGBSA_ligand_efficiency_sa>
-3.41185608745677

> <r_psp_Prime_MMGBSA_ligand_efficiency_ln>
-12.6502719971966

> <i_psp_ExecuteFunction_Internal_Entry_Index>
33

> <b_m_m_glide_XPvisualizer>
1

> <i_qp_#stars>
0

> <i_qp_#amine>
1

> <i_qp_#amidine>
0

> <i_qp_#acid>
0

> <i_qp_#amide>
0

> <i_qp_#rotor>
6

> <i_qp_#rtvFG>
0

> <i_qp_CNS>
0

> <r_qp_mol_MW>
   311.426

> <r_qp_dipole>
     5.961

> <r_qp_SASA>
   656.402

> <r_qp_FOSA>
   383.658

> <r_qp_FISA>
    58.531

> <r_qp_PISA>
   214.213

> <r_qp_WPSA>
     0.000

> <r_qp_volume>
  1123.961

> <r_qp_donorHB>
     3.000

> <r_qp_accptHB>
     4.000

> <r_qp_dip^2/V>
   0.0316174

> <r_qp_ACxDN^.5/SA>
   0.0105548

> <r_qp_glob>
   0.7964575

> <r_qp_QPpolrz>
    37.020

> <r_qp_QPlogPC16>
    11.255

> <r_qp_QPlogPoct>
    18.507

> <r_qp_QPlogPw>
    10.164

> <r_qp_QPlogPo/w>
     3.567

> <r_qp_QPlogS>
    -4.216

> <r_qp_CIQPlogS>
    -3.221

> <r_qp_QPlogHERG>
    -6.573

> <r_qp_QPPCaco>
   688.258

> <r_qp_QPlogBB>
    -0.015

> <r_qp_QPPMDCK>
   365.475

> <r_qp_QPlogKp>
    -3.330

> <r_qp_IP(eV)>
     8.389

> <r_qp_EA(eV)>
     0.399

> <i_qp_#metab>
3

> <r_qp_QPlogKhsa>
     0.459

> <i_qp_HumanOralAbsorption>
3

> <r_qp_PercentHumanOralAbsorption>
   100.000

> <r_qp_SAfluorine>
     0.000

> <r_qp_SAamideO>
     0.000

> <r_qp_PSA>
    62.351

> <i_qp_#NandO>
4

> <i_qp_RuleOfFive>
0

> <i_qp_RuleOfThree>
0

> <i_qp_#ringatoms>
15

> <i_qp_#in34>
0

> <i_qp_#in56>
15

> <i_qp_#noncon>
6

> <i_qp_#nonHatm>
23

> <r_qp_Jm>
0.00886376761983286

> <s_m_subgroupid>
1000_str-imp1->adme_1000-out12

> <s_m_subgroup_title>
1000_str->adme_1000-out1

> <b_m_subgroup_collapsed>
0

$$$$
GR-15
                    3D
 Structure written by MMmdl.
 59 62  0  0  1  0            999 V2000
   -1.2406    4.8812   -1.7324 C   0  0  0  0  0  0
   -1.1900    3.7343   -0.9324 C   0  0  0  0  0  0
   -0.5251    2.5439   -1.3390 C   0  0  0  0  0  0
    0.1016    2.5261   -2.5972 C   0  0  0  0  0  0
    0.0526    3.6654   -3.3987 C   0  0  0  0  0  0
   -0.6044    4.8160   -2.9720 C   0  0  0  0  0  0
   -0.6599    1.5775   -0.2778 C   0  0  0  0  0  0
   -1.4219    2.1930    0.7256 C   0  0  0  0  0  0
   -1.7030    3.4806    0.3164 N   0  0  0  0  0  0
   -0.0743    0.1725   -0.3160 C   0  0  0  0  0  0
    1.4438    0.2243   -0.0679 N   0  3  0  0  0  0
   -1.8045    1.6762    2.0253 C   0  0  0  0  0  0
   -2.8065    2.3424    2.6357 N   0  0  0  0  0  0
   -3.3555    2.0332    3.9581 C   0  0  0  0  0  0
   -2.4025    2.3300    5.1469 C   0  0  0  0  0  0
   -3.0251    2.0397    6.5268 C   0  0  0  0  0  0
   -4.3989    2.7070    6.7002 C   0  0  0  0  0  0
   -5.3595    2.3052    5.5693 C   0  0  0  0  0  0
   -4.7772    2.6059    4.1741 C   0  0  0  0  0  0
   -1.2508    0.6909    2.5141 O   0  0  0  0  0  0
    1.8807    0.7317    1.3166 C   0  0  0  0  0  0
    3.3900    0.7439    1.4831 C   0  0  0  0  0  0
    4.0366   -0.3407    2.0778 C   0  0  0  0  0  0
    5.4192   -0.3208    2.2386 C   0  0  0  0  0  0
    6.1685    0.7775    1.8139 C   0  0  0  0  0  0
    5.5105    1.8704    1.2266 C   0  0  0  0  0  0
    4.1275    1.8537    1.0673 C   0  0  0  0  0  0
    7.5342    0.7041    2.0098 O   0  0  0  0  0  0
    8.3568    1.7852    1.5837 C   0  0  0  0  0  0
   -1.7463    5.7810   -1.4133 H   0  0  0  0  0  0
    0.6181    1.6438   -2.9452 H   0  0  0  0  0  0
    0.5325    3.6564   -4.3666 H   0  0  0  0  0  0
   -0.6216    5.6814   -3.6187 H   0  0  0  0  0  0
   -2.2234    4.1228    0.8962 H   0  0  0  0  0  0
   -0.4578   -0.5196    0.4331 H   0  0  0  0  0  0
   -0.1645   -0.3018   -1.2937 H   0  0  0  0  0  0
   -3.1733    3.1710    2.1915 H   0  0  0  0  0  0
   -3.5015    0.9499    3.9785 H   0  0  0  0  0  0
   -1.4785    1.7586    5.0486 H   0  0  0  0  0  0
   -2.1246    3.3848    5.1194 H   0  0  0  0  0  0
   -3.1291    0.9611    6.6557 H   0  0  0  0  0  0
   -2.3484    2.3738    7.3144 H   0  0  0  0  0  0
   -4.8263    2.4329    7.6656 H   0  0  0  0  0  0
   -4.2814    3.7917    6.7150 H   0  0  0  0  0  0
   -5.5809    1.2396    5.6457 H   0  0  0  0  0  0
   -6.3128    2.8210    5.6918 H   0  0  0  0  0  0
   -4.7437    3.6899    4.0535 H   0  0  0  0  0  0
   -5.4577    2.2240    3.4113 H   0  0  0  0  0  0
    1.4576    1.7326    1.4139 H   0  0  0  0  0  0
    1.3901    0.0686    2.0309 H   0  0  0  0  0  0
    3.4727   -1.1989    2.4136 H   0  0  0  0  0  0
    5.9139   -1.1652    2.6965 H   0  0  0  0  0  0
    6.0546    2.7397    0.8896 H   0  0  0  0  0  0
    3.6324    2.7017    0.6159 H   0  0  0  0  0  0
    9.3981    1.5565    1.8104 H   0  0  0  0  0  0
    8.1021    2.7107    2.1020 H   0  0  0  0  0  0
    8.2814    1.9447    0.5069 H   0  0  0  0  0  0
    1.8151   -0.7072   -0.1891 H   0  0  0  0  0  0
    1.8645    0.8103   -0.7748 H   0  0  0  0  0  0
  1  2  1  0  0  0
  1  6  2  0  0  0
  1 30  1  0  0  0
  2  3  2  0  0  0
  2  9  1  0  0  0
  3  4  1  0  0  0
  3  7  1  0  0  0
  4  5  2  0  0  0
  4 31  1  0  0  0
  5  6  1  0  0  0
  5 32  1  0  0  0
  6 33  1  0  0  0
  7  8  2  0  0  0
  7 10  1  0  0  0
  8  9  1  0  0  0
  8 12  1  0  0  0
  9 34  1  0  0  0
 10 11  1  0  0  0
 10 35  1  0  0  0
 10 36  1  0  0  0
 11 21  1  0  0  0
 11 58  1  0  0  0
 11 59  1  0  0  0
 12 13  1  0  0  0
 12 20  2  0  0  0
 13 14  1  0  0  0
 13 37  1  0  0  0
 14 19  1  0  0  0
 14 15  1  0  0  0
 14 38  1  0  0  0
 15 16  1  0  0  0
 15 39  1  0  0  0
 15 40  1  0  0  0
 16 17  1  0  0  0
 16 41  1  0  0  0
 16 42  1  0  0  0
 17 18  1  0  0  0
 17 43  1  0  0  0
 17 44  1  0  0  0
 18 19  1  0  0  0
 18 45  1  0  0  0
 18 46  1  0  0  0
 19 47  1  0  0  0
 19 48  1  0  0  0
 21 22  1  0  0  0
 21 49  1  0  0  0
 21 50  1  0  0  0
 22 27  1  0  0  0
 22 23  2  0  0  0
 23 24  1  0  0  0
 23 51  1  0  0  0
 24 25  2  0  0  0
 24 52  1  0  0  0
 25 26  1  0  0  0
 25 28  1  0  0  0
 26 27  2  0  0  0
 26 53  1  0  0  0
 27 54  1  0  0  0
 28 29  1  0  0  0
 29 55  1  0  0  0
 29 56  1  0  0  0
 29 57  1  0  0  0
M  CHG  1  11   1
M  END
> <s_m_entry_id>
7925

> <s_m_entry_name>
entry

> <i_f3d_flags>
0

> <s_m_job_name>
adme_1000

> <r_psp_Prime_Energy>
-34966.4364962323

> <r_psp_Prime_Solv_GB>
-5261.55474361395

> <r_psp_Prime_Coulomb>
-26423.6412834893

> <r_psp_Prime_vdW>
-4530.34047560321

> <r_psp_Prime_Covalent>
4047.16782505344

> <i_psp_model_num>
0

> <r_psp_Prime_Lipo>
-2151.71767950855

> <s_psp_Prime_Energy_Force_Field>
OPLS3e

> <s_psp_Prime_Energy_Solvent_Model>
VSGB2.1

> <r_psp_Prime_Hbond>
-550.097605083181

> <r_psp_Prime_Packing>
-55.8446424272089

> <r_psp_Prime_SelfCont>
-40.4078915603482

> <r_psp_Memb1_x>
103.457542316003

> <r_psp_Memb1_y>
39.4731108300965

> <r_psp_Memb1_z>
48.7987221124676

> <r_psp_Memb2_x>
99.8134167309003

> <r_psp_Memb2_y>
2.81176945184187

> <r_psp_Memb2_z>
23.8404289603493

> <r_psp_MembDummyRadius>
4.45

> <r_psp_Prime_Bond_Covalent>
468.155894816051

> <r_psp_Prime_Bond_SGB>
49973.4365749614

> <r_psp_Prime_Angle_Covalent>
2226.1360175528

> <r_psp_Prime_Angle_SGB>
-21642.4573189026

> <r_psp_Prime_Torsion_Covalent>
1352.87591268458

> <r_psp_Prime_NB14_LJ>
4089.50608288726

> <r_psp_Prime_NB14_Lipo>
0

> <r_psp_Prime_NB14_Elec>
25547.0880110905

> <r_psp_Prime_NB14_SGB>
-15605.6280546479

> <r_psp_Prime_NBShort_LJ>
-8212.33852154897

> <r_psp_Prime_NBShort_Lipo>
-2151.71767950855

> <r_psp_Prime_NBShort_Elec>
-53026.1328031032

> <r_psp_Prime_NBShort_SGB>
17984.9329374961

> <r_psp_Prime_NBLong_LJ>
-407.508036941501

> <r_psp_Prime_NBLong_Lipo>
0

> <r_psp_Prime_NBLong_Elec>
1055.40350852345

> <r_psp_Prime_NBLong_SGB>
-1211.13369328283

> <r_psp_Prime_Self_SGB>
-34760.7051892381

> <s_m_Source_Path>
F:\Dekstop_files\DAC4,5\Molecular Systems Desgn and Engineering\supplementary_str

> <s_m_Source_File>
1000_str.mae

> <i_m_Source_File_Index>
849

> <i_lp_mmshare_version>
53156

> <s_epik_input>
W2NIXTFbY0hdYyhPW0NIM10pW2NIXVtjSF1jMVtDSDJdW05IXVtDSDJdYyhjKGMyMylbY0hdW2NIXVtjSF1bY0hdMiljKFtuSF0zKUMoPU8pW05IXVtDSF00W0NIMl1bQ0gyXVtDSDJdW0NIMl1bQ0gyXTQ=

> <s_epik_cmdline>
J2VwaWtfcHl0aG9uJywgJy1waHQnLCAnMC4wJywgJy1waCcsICc3LjAnLCAnLXRuJywgJzgnLCAnLW1hJywgJzUwMCcsICctaW1hZScsICc8aW5maWxlLm1hZT4nLCAnLW9tYWUnLCAnPG91dGZpbGUubWFlPic=

> <r_lp_tautomer_probability>
1

> <r_epik_Ionization_Penalty>
  0.0782

> <r_epik_Ionization_Penalty_Charging>
  0.0782

> <r_epik_Ionization_Penalty_Neutral>
  0.0000

> <r_epik_State_Penalty>
  0.0692

> <r_epik_Charging_Adjusted_Penalty>
0.147399602182074

> <i_epik_Tot_Q>
1

> <i_epik_Tot_abs_Q>
1

> <s_lp_Force_Field>
S-OPLS

> <r_lp_Energy>
46.82223

> <b_lp_Chiralities_Consistent>
1

> <s_lp_Variant>
GR-15-1

> <s_i_glide_gridfile>
glide-grid_1_oct_mmpl3_after_loop_refinement

> <i_i_glide_lignum>
11

> <i_i_glide_rotatable_bonds>
8

> <r_i_docking_score>
-8.51754361454118

> <r_i_glide_ligand_efficiency>
-0.29370840050142

> <r_i_glide_ligand_efficiency_sa>
-0.902365259692947

> <r_i_glide_ligand_efficiency_ln>
-1.95030150145967

> <r_glide_XP_GScore>
-8.58674361454118

> <r_i_glide_gscore>
-8.58674361454118

> <r_i_glide_evdw>
-47.0404319763184

> <r_i_glide_ecoul>
-2.55619931221008

> <r_i_glide_energy>
-49.5966312885284

> <r_i_glide_einternal>
15.0254545211792

> <r_i_glide_emodel>
-68.2011276267652

> <r_glide_XP_HBond>
0

> <r_glide_XP_PhobEn>
-2.7

> <r_glide_XP_PhobEnHB>
0

> <r_glide_XP_LowMW>
-0.191620333333333

> <r_glide_XP_RotPenal>
0.38020149787419

> <r_glide_XP_LipophilicEvdW>
-8.63918076634044

> <r_glide_XP_PhobEnPairHB>
0

> <r_glide_XP_Electro>
-0.191714948415756

> <r_glide_XP_Sitemap>
-0.244520296802794

> <r_glide_XP_Penalties>
3.00009123247695

> <r_glide_XP_PiStack>
0

> <r_glide_XP_HBPenal>
0

> <r_glide_XP_ExposPenal>
0

> <r_glide_XP_PiCat>
0

> <r_glide_XP_ClBr>
0

> <r_glide_XP_Zpotr>
0

> <i_i_glide_confnum>
1

> <i_i_glide_posenum>
30

> <r_i_glide_eff_state_penalty>
0.0692

> <i_glide_XP_PoseRank>
1

> <r_i_glide_rmsd_to_input>
109.403293345374

> <s_psp_Prime_MMGBSA_Input_Structure_Hash>
ce10ebbf821336b113a1c7f9843628c829487987ff79fe28d75acb08

> <i_psp_number_heavy_atoms>
29

> <r_psp_MMGBSA_dG_Bind>
-58.1559809960963

> <r_psp_MMGBSA_dG_Bind_Coulomb>
48.5873383519756

> <r_psp_MMGBSA_dG_Bind_Covalent>
12.8007195258606

> <r_psp_MMGBSA_dG_Bind_Hbond>
-2.27373675443232e-013

> <r_psp_MMGBSA_dG_Bind_Lipo>
-31.1726857873086

> <r_psp_MMGBSA_dG_Bind_Packing>
4.9737991503207e-014

> <r_psp_MMGBSA_dG_Bind_SelfCont>
7.105427357601e-015

> <r_psp_MMGBSA_dG_Bind_Solv_GB>
-34.1285546866138

> <r_psp_MMGBSA_dG_Bind_vdW>
-54.2427984000697

> <r_psp_Lig_Strain_Energy>
26.7127128539246

> <r_psp_Lig_Strain_Coulomb>
7.03055922454181

> <r_psp_Lig_Strain_Covalent>
12.8009203939719

> <r_psp_Lig_Strain_Hbond>
0

> <r_psp_Lig_Strain_Lipo>
4.01356617534806

> <r_psp_Lig_Strain_Packing>
0

> <r_psp_Lig_Strain_SelfCont>
0

> <r_psp_Lig_Strain_Solv_GB>
-4.24596899558746

> <r_psp_Lig_Strain_vdW>
7.11363605565036

> <r_psp_Ligand_Energy>
5.46626155460622

> <r_psp_Ligand_Coulomb>
-11.5901934151548

> <r_psp_Ligand_Covalent>
25.2117645583454

> <r_psp_Ligand_Hbond>
0

> <r_psp_Ligand_Lipo>
-7.0617655681655

> <r_psp_Ligand_Packing>
0

> <r_psp_Ligand_SelfCont>
0

> <r_psp_Ligand_Solv_GB>
-17.6018576893258

> <r_psp_Ligand_vdW>
16.5083136689069

> <r_psp_Complex_Energy>
-34966.4364962323

> <r_psp_Complex_Coulomb>
-26423.6412834893

> <r_psp_Complex_Covalent>
4047.16782505344

> <r_psp_Complex_Hbond>
-550.097605083181

> <r_psp_Complex_Lipo>
-2151.71767950855

> <r_psp_Complex_Packing>
-55.8446424272089

> <r_psp_Complex_SelfCont>
-40.4078915603482

> <r_psp_Complex_Solv_GB>
-5261.55474361395

> <r_psp_Complex_vdW>
-4530.34047560321

> <r_psp_Receptor_Energy>
-34913.7467767908

> <r_psp_Receptor_Coulomb>
-26460.6384284261

> <r_psp_Receptor_Covalent>
4009.15534096923

> <r_psp_Receptor_Hbond>
-550.097605083181

> <r_psp_Receptor_Lipo>
-2113.48322815308

> <r_psp_Receptor_Packing>
-55.8446424272089

> <r_psp_Receptor_SelfCont>
-40.4078915603482

> <r_psp_Receptor_Solv_GB>
-5209.82433123801

> <r_psp_Receptor_vdW>
-4492.60599087205

> <r_psp_MMGBSA_dG_Bind(NS)>
-84.8686938500759

> <r_psp_MMGBSA_dG_Bind(NS)_Coulomb>
41.5567791274443

> <r_psp_MMGBSA_dG_Bind(NS)_Covalent>
-0.000200868115371122

> <r_psp_MMGBSA_dG_Bind(NS)_Hbond>
0

> <r_psp_MMGBSA_dG_Bind(NS)_Lipo>
-35.1862519626538

> <r_psp_MMGBSA_dG_Bind(NS)_Packing>
0

> <r_psp_MMGBSA_dG_Bind(NS)_SelfCont>
0

> <r_psp_MMGBSA_dG_Bind(NS)_Solv_GB>
-29.8825856910289

> <r_psp_MMGBSA_dG_Bind(NS)_vdW>
-61.3564344557244

> <r_psp_Rec_Strain_Energy>
5.0931703299284e-011

> <r_psp_Rec_Strain_Coulomb>
-1.09139364212751e-011

> <r_psp_Rec_Strain_Covalent>
4.09272615797818e-012

> <r_psp_Rec_Strain_Hbond>
-2.27373675443232e-013

> <r_psp_Rec_Strain_Lipo>
-2.72848410531878e-012

> <r_psp_Rec_Strain_Packing>
4.9737991503207e-014

> <r_psp_Rec_Strain_SelfCont>
7.105427357601e-015

> <r_psp_Rec_Strain_Solv_GB>
2.72848410531878e-012

> <r_psp_Rec_Strain_vdW>
4.54747350886464e-012

> <r_psp_Prime_MMGBSA_ligand_efficiency>
-2.0053786550378

> <r_psp_Prime_MMGBSA_ligand_efficiency_sa>
-3.00806798255671

> <r_psp_Prime_MMGBSA_ligand_efficiency_ln>
-13.3162449396693

> <i_psp_ExecuteFunction_Internal_Entry_Index>
84

> <b_m_m_glide_XPvisualizer>
1

> <i_qp_#stars>
0

> <i_qp_#amine>
1

> <i_qp_#amidine>
0

> <i_qp_#acid>
0

> <i_qp_#amide>
0

> <i_qp_#rotor>
7

> <i_qp_#rtvFG>
0

> <i_qp_CNS>
0

> <r_qp_mol_MW>
   391.512

> <r_qp_dipole>
     8.288

> <r_qp_SASA>
   745.949

> <r_qp_FOSA>
   381.932

> <r_qp_FISA>
    55.235

> <r_qp_PISA>
   308.783

> <r_qp_WPSA>
     0.000

> <r_qp_volume>
  1324.186

> <r_qp_donorHB>
     3.000

> <r_qp_accptHB>
     4.750

> <r_qp_dip^2/V>
   0.0518763

> <r_qp_ACxDN^.5/SA>
   0.0110292

> <r_qp_glob>
   0.7817867

> <r_qp_QPpolrz>
    45.294

> <r_qp_QPlogPC16>
    13.879

> <r_qp_QPlogPoct>
    22.178

> <r_qp_QPlogPw>
    11.519

> <r_qp_QPlogPo/w>
     4.663

> <r_qp_QPlogS>
    -5.404

> <r_qp_CIQPlogS>
    -4.903

> <r_qp_QPlogHERG>
    -7.262

> <r_qp_QPPCaco>
   739.623

> <r_qp_QPlogBB>
    -0.062

> <r_qp_QPPMDCK>
   395.044

> <r_qp_QPlogKp>
    -2.840

> <r_qp_IP(eV)>
     8.536

> <r_qp_EA(eV)>
     0.573

> <i_qp_#metab>
4

> <r_qp_QPlogKhsa>
     0.818

> <i_qp_HumanOralAbsorption>
3

> <r_qp_PercentHumanOralAbsorption>
   100.000

> <r_qp_SAfluorine>
     0.000

> <r_qp_SAamideO>
     0.000

> <r_qp_PSA>
    69.956

> <i_qp_#NandO>
5

> <i_qp_RuleOfFive>
0

> <i_qp_RuleOfThree>
0

> <i_qp_#ringatoms>
21

> <i_qp_#in34>
0

> <i_qp_#in56>
21

> <i_qp_#noncon>
6

> <i_qp_#nonHatm>
29

> <r_qp_Jm>
0.00222878748756843

> <s_m_subgroupid>
1000_str-imp1->adme_1000-out12

> <s_m_subgroup_title>
1000_str->adme_1000-out1

> <b_m_subgroup_collapsed>
0

$$$$
GR-16
                    3D
 Structure written by MMmdl.
 56 59  0  0  1  0            999 V2000
   -3.4390    1.7545    0.3485 C   0  0  0  0  0  0
   -2.3559    0.8743    0.2485 C   0  0  0  0  0  0
   -1.0049    1.3207    0.2174 C   0  0  0  0  0  0
   -0.7567    2.7025    0.2927 C   0  0  0  0  0  0
   -1.8323    3.5830    0.3940 C   0  0  0  0  0  0
   -3.1432    3.1157    0.4206 C   0  0  0  0  0  0
   -0.1599    0.1593    0.0994 C   0  0  0  0  0  0
   -1.0107   -0.9537    0.0954 C   0  0  0  0  0  0
   -2.3109   -0.4961    0.1600 N   0  0  0  0  0  0
    1.3597    0.1953    0.0318 C   0  0  0  0  0  0
   -0.6655   -2.3556   -0.0407 C   0  0  0  0  0  0
   -1.6438   -3.2222    0.2937 N   0  0  0  0  0  0
   -1.5517   -4.6832    0.2384 C   0  0  0  0  0  0
   -2.6169   -5.3888    1.1126 C   0  0  0  0  0  0
   -2.5503   -6.9278    1.0507 C   0  0  0  0  0  0
   -2.5494   -7.4532   -0.3939 C   0  0  0  0  0  0
   -1.4125   -6.8232   -1.2147 C   0  0  0  0  0  0
   -1.4557   -5.2823   -1.1907 C   0  0  0  0  0  0
    0.4535   -2.7066   -0.4187 O   0  0  0  0  0  0
    1.8336   -0.0010   -1.4291 N   0  3  2  0  0  0
    3.3613   -0.2480   -1.4522 C   0  0  0  0  0  0
    3.8109   -0.5012   -2.9047 C   0  0  0  0  0  0
    3.4261    0.6481   -3.8580 C   0  0  1  0  0  0
    1.9118    0.9258   -3.7699 C   0  0  0  0  0  0
    1.4330    1.1948   -2.3296 C   0  0  0  0  0  0
    4.1665    1.8158   -3.5534 O   0  0  0  0  0  0
   -4.4612    1.4060    0.3705 H   0  0  0  0  0  0
    0.2530    3.0852    0.2711 H   0  0  0  0  0  0
   -1.6467    4.6458    0.4522 H   0  0  0  0  0  0
   -3.9528    3.8269    0.4995 H   0  0  0  0  0  0
   -3.1000   -1.1260    0.1448 H   0  0  0  0  0  0
    1.8038    1.1313    0.3752 H   0  0  0  0  0  0
    1.8093   -0.6222    0.5976 H   0  0  0  0  0  0
   -2.5514   -2.8515    0.5328 H   0  0  0  0  0  0
   -0.6034   -4.9428    0.7165 H   0  0  0  0  0  0
   -2.5261   -5.0672    2.1515 H   0  0  0  0  0  0
   -3.6087   -5.0854    0.7734 H   0  0  0  0  0  0
   -1.6485   -7.2710    1.5605 H   0  0  0  0  0  0
   -3.3892   -7.3566    1.6003 H   0  0  0  0  0  0
   -2.4501   -8.5394   -0.3948 H   0  0  0  0  0  0
   -3.5085   -7.2333   -0.8654 H   0  0  0  0  0  0
   -0.4530   -7.1626   -0.8211 H   0  0  0  0  0  0
   -1.4584   -7.1787   -2.2449 H   0  0  0  0  0  0
   -2.3268   -4.9623   -1.7647 H   0  0  0  0  0  0
   -0.5774   -4.8966   -1.7097 H   0  0  0  0  0  0
    3.8370    0.6303   -1.0124 H   0  0  0  0  0  0
    3.5542   -1.1170   -0.8212 H   0  0  0  0  0  0
    4.8911   -0.6531   -2.9253 H   0  0  0  0  0  0
    3.3761   -1.4356   -3.2629 H   0  0  0  0  0  0
    3.6858    0.3740   -4.8816 H   0  0  0  0  0  0
    1.6551    1.7794   -4.3994 H   0  0  0  0  0  0
    1.3604    0.0801   -4.1839 H   0  0  0  0  0  0
    0.3475    1.2841   -2.2933 H   0  0  0  0  0  0
    1.8829    2.0896   -1.8963 H   0  0  0  0  0  0
    3.9718    2.0775   -2.6508 H   0  0  0  0  0  0
    1.3893   -0.8326   -1.7937 H   0  0  0  0  0  0
  1  2  1  0  0  0
  1  6  2  0  0  0
  1 27  1  0  0  0
  2  3  2  0  0  0
  2  9  1  0  0  0
  3  4  1  0  0  0
  3  7  1  0  0  0
  4  5  2  0  0  0
  4 28  1  0  0  0
  5  6  1  0  0  0
  5 29  1  0  0  0
  6 30  1  0  0  0
  7  8  2  0  0  0
  7 10  1  0  0  0
  8  9  1  0  0  0
  8 11  1  0  0  0
  9 31  1  0  0  0
 10 20  1  0  0  0
 10 32  1  0  0  0
 10 33  1  0  0  0
 11 12  1  0  0  0
 11 19  2  0  0  0
 12 13  1  0  0  0
 12 34  1  0  0  0
 13 18  1  0  0  0
 13 14  1  0  0  0
 13 35  1  0  0  0
 14 15  1  0  0  0
 14 36  1  0  0  0
 14 37  1  0  0  0
 15 16  1  0  0  0
 15 38  1  0  0  0
 15 39  1  0  0  0
 16 17  1  0  0  0
 16 40  1  0  0  0
 16 41  1  0  0  0
 17 18  1  0  0  0
 17 42  1  0  0  0
 17 43  1  0  0  0
 18 44  1  0  0  0
 18 45  1  0  0  0
 20 25  1  0  0  0
 20 21  1  0  0  0
 20 56  1  0  0  0
 21 22  1  0  0  0
 21 46  1  0  0  0
 21 47  1  0  0  0
 22 23  1  0  0  0
 22 48  1  0  0  0
 22 49  1  0  0  0
 23 24  1  0  0  0
 23 26  1  0  0  0
 23 50  1  0  0  0
 24 25  1  0  0  0
 24 51  1  0  0  0
 24 52  1  0  0  0
 25 53  1  0  0  0
 25 54  1  0  0  0
 26 55  1  0  0  0
M  CHG  1  20   1
M  END
> <s_m_entry_id>
7274

> <s_m_entry_name>
entry

> <i_f3d_flags>
0

> <s_m_job_name>
adme_1000

> <r_psp_Prime_Energy>
-34948.772045584

> <r_psp_Prime_Solv_GB>
-5275.28191776366

> <r_psp_Prime_Coulomb>
-26408.9978216054

> <r_psp_Prime_vdW>
-4513.27561726617

> <r_psp_Prime_Covalent>
4040.63810796204

> <i_psp_model_num>
0

> <r_psp_Prime_Lipo>
-2145.50367258566

> <s_psp_Prime_Energy_Force_Field>
OPLS3e

> <s_psp_Prime_Energy_Solvent_Model>
VSGB2.1

> <r_psp_Prime_Hbond>
-550.098589918757

> <r_psp_Prime_Packing>
-55.8446428461123

> <r_psp_Prime_SelfCont>
-40.4078915603482

> <r_psp_Memb1_x>
103.457542316003

> <r_psp_Memb1_y>
39.4731108300965

> <r_psp_Memb1_z>
48.7987221124676

> <r_psp_Memb2_x>
99.8134167309003

> <r_psp_Memb2_y>
2.81176945184187

> <r_psp_Memb2_z>
23.8404289603493

> <r_psp_MembDummyRadius>
4.45

> <r_psp_Prime_Bond_Covalent>
467.287487372101

> <r_psp_Prime_Bond_SGB>
49991.3623261916

> <r_psp_Prime_Angle_Covalent>
2229.43812982804

> <r_psp_Prime_Angle_SGB>
-21652.2767217406

> <r_psp_Prime_Torsion_Covalent>
1343.91249076189

> <r_psp_Prime_NB14_LJ>
4083.51084486845

> <r_psp_Prime_NB14_Lipo>
0

> <r_psp_Prime_NB14_Elec>
25523.4229557479

> <r_psp_Prime_NB14_SGB>
-15597.5942673263

> <r_psp_Prime_NBShort_LJ>
-8189.33753695099

> <r_psp_Prime_NBShort_Lipo>
-2145.50367258566

> <r_psp_Prime_NBShort_Elec>
-53016.8074732925

> <r_psp_Prime_NBShort_SGB>
17996.2673772451

> <r_psp_Prime_NBLong_LJ>
-407.448925183629

> <r_psp_Prime_NBLong_Lipo>
0

> <r_psp_Prime_NBLong_Elec>
1084.38669593929

> <r_psp_Prime_NBLong_SGB>
-1241.03009443335

> <r_psp_Prime_Self_SGB>
-34772.0105377

> <s_m_Source_Path>
F:\Dekstop_files\DAC4,5\Molecular Systems Desgn and Engineering\supplementary_str

> <s_m_Source_File>
1000_str.mae

> <i_m_Source_File_Index>
198

> <i_lp_mmshare_version>
53156

> <s_epik_input>
W0NIMl0xW0NIMl1bQ0hdKFtPSF0pW0NIMl1bQ0gyXU4xW0NIMl1jKGMoYzIzKVtjSF1bY0hdW2NIXVtjSF0yKWMoW25IXTMpQyg9TylbTkhdW0NIXTRbQ0gyXVtDSDJdW0NIMl1bQ0gyXVtDSDJdNA==

> <s_epik_cmdline>
J2VwaWtfcHl0aG9uJywgJy1waHQnLCAnMC4wJywgJy1waCcsICc3LjAnLCAnLXRuJywgJzgnLCAnLW1hJywgJzUwMCcsICctaW1hZScsICc8aW5maWxlLm1hZT4nLCAnLW9tYWUnLCAnPG91dGZpbGUubWFlPic=

> <r_epik_Ionization_Penalty>
  0.0441

> <r_epik_Ionization_Penalty_Charging>
  0.0441

> <r_epik_Ionization_Penalty_Neutral>
  0.0000

> <r_epik_State_Penalty>
  0.0373

> <r_epik_Charging_Adjusted_Penalty>
0.0814057104876503

> <i_epik_Tot_Q>
1

> <i_epik_Tot_abs_Q>
1

> <s_lp_Force_Field>
S-OPLS

> <r_lp_Energy>
39.555147

> <b_lp_Chiralities_Consistent>
1

> <s_lp_Variant>
GR-16-1

> <s_i_glide_gridfile>
glide-grid_1_oct_mmpl3_after_loop_refinement

> <i_i_glide_lignum>
13

> <i_i_glide_rotatable_bonds>
6

> <r_i_docking_score>
-7.12219238267582

> <r_i_glide_ligand_efficiency>
-0.273930476256762

> <r_i_glide_ligand_efficiency_sa>
-0.811517958046282

> <r_i_glide_ligand_efficiency_ln>
-1.67262351125208

> <r_glide_XP_GScore>
-7.15949238267582

> <r_i_glide_gscore>
-7.15949238267582

> <r_i_glide_evdw>
-37.4572601318359

> <r_i_glide_ecoul>
-0.59072470664978

> <r_i_glide_energy>
-38.0479848384857

> <r_i_glide_einternal>
5.1046028137207

> <r_i_glide_emodel>
-52.9914353061745

> <r_glide_XP_HBond>
0

> <r_glide_XP_PhobEn>
-2.66417592119314

> <r_glide_XP_PhobEnHB>
0

> <r_glide_XP_LowMW>
-0.311727333333333

> <r_glide_XP_RotPenal>
0.322625352283035

> <r_glide_XP_LipophilicEvdW>
-7.06191678207598

> <r_glide_XP_PhobEnPairHB>
0

> <r_glide_XP_Electro>
-0.0443043529987335

> <r_glide_XP_Sitemap>
-0.4

> <r_glide_XP_Penalties>
3.00000665464233

> <r_glide_XP_PiStack>
0

> <r_glide_XP_HBPenal>
0

> <r_glide_XP_ExposPenal>
0

> <r_glide_XP_PiCat>
0

> <r_glide_XP_ClBr>
0

> <r_glide_XP_Zpotr>
0

> <i_i_glide_confnum>
1

> <i_i_glide_posenum>
283

> <r_i_glide_eff_state_penalty>
0.0373

> <i_glide_XP_PoseRank>
1

> <r_i_glide_rmsd_to_input>
112.686899690085

> <s_psp_Prime_MMGBSA_Input_Structure_Hash>
9e3d0ea7633d44ee35f2a8557d7d4a0dfb72a8a036520d533c856c21

> <i_psp_number_heavy_atoms>
26

> <r_psp_MMGBSA_dG_Bind>
-42.6960807682044

> <r_psp_MMGBSA_dG_Bind_Coulomb>
57.1779062943206

> <r_psp_MMGBSA_dG_Bind_Covalent>
8.01665344532012

> <r_psp_MMGBSA_dG_Bind_Hbond>
-0.000984835575991383

> <r_psp_MMGBSA_dG_Bind_Lipo>
-30.1652800028978

> <r_psp_MMGBSA_dG_Bind_Packing>
-4.18903432830575e-007

> <r_psp_MMGBSA_dG_Bind_SelfCont>
7.105427357601e-015

> <r_psp_MMGBSA_dG_Bind_Solv_GB>
-42.6609278240894

> <r_psp_MMGBSA_dG_Bind_vdW>
-35.0634474264334

> <r_psp_Lig_Strain_Energy>
11.9585644922821

> <r_psp_Lig_Strain_Coulomb>
0.00349611414789486

> <r_psp_Lig_Strain_Covalent>
8.01685431343154

> <r_psp_Lig_Strain_Hbond>
0

> <r_psp_Lig_Strain_Lipo>
-0.373927537548919

> <r_psp_Lig_Strain_Packing>
0

> <r_psp_Lig_Strain_SelfCont>
0

> <r_psp_Lig_Strain_Solv_GB>
-0.200304876953709

> <r_psp_Lig_Strain_vdW>
4.51244647920525

> <r_psp_Ligand_Energy>
7.67081197497839

> <r_psp_Ligand_Coulomb>
-5.53729947358008

> <r_psp_Ligand_Covalent>
23.4661135474859

> <r_psp_Ligand_Hbond>
0

> <r_psp_Ligand_Lipo>
-1.85516442967949

> <r_psp_Ligand_Packing>
0

> <r_psp_Ligand_SelfCont>
0

> <r_psp_Ligand_Solv_GB>
-22.796658701563

> <r_psp_Ligand_vdW>
14.3938210323151

> <r_psp_Complex_Energy>
-34948.772045584

> <r_psp_Complex_Coulomb>
-26408.9978216054

> <r_psp_Complex_Covalent>
4040.63810796204

> <r_psp_Complex_Hbond>
-550.098589918757

> <r_psp_Complex_Lipo>
-2145.50367258566

> <r_psp_Complex_Packing>
-55.8446428461123

> <r_psp_Complex_SelfCont>
-40.4078915603482

> <r_psp_Complex_Solv_GB>
-5275.28191776366

> <r_psp_Complex_vdW>
-4513.27561726617

> <r_psp_Receptor_Energy>
-34913.7467767908

> <r_psp_Receptor_Coulomb>
-26460.6384284261

> <r_psp_Receptor_Covalent>
4009.15534096923

> <r_psp_Receptor_Hbond>
-550.097605083181

> <r_psp_Receptor_Lipo>
-2113.48322815308

> <r_psp_Receptor_Packing>
-55.8446424272089

> <r_psp_Receptor_SelfCont>
-40.4078915603482

> <r_psp_Receptor_Solv_GB>
-5209.82433123801

> <r_psp_Receptor_vdW>
-4492.60599087205

> <r_psp_MMGBSA_dG_Bind(NS)>
-54.6546452605326

> <r_psp_MMGBSA_dG_Bind(NS)_Coulomb>
57.1744101801814

> <r_psp_MMGBSA_dG_Bind(NS)_Covalent>
-0.00020086811582587

> <r_psp_MMGBSA_dG_Bind(NS)_Hbond>
-0.000984835575764009

> <r_psp_MMGBSA_dG_Bind(NS)_Lipo>
-29.7913524653463

> <r_psp_MMGBSA_dG_Bind(NS)_Packing>
-4.18903482568567e-007

> <r_psp_MMGBSA_dG_Bind(NS)_SelfCont>
0

> <r_psp_MMGBSA_dG_Bind(NS)_Solv_GB>
-42.4606229471392

> <r_psp_MMGBSA_dG_Bind(NS)_vdW>
-39.5758939056432

> <r_psp_Rec_Strain_Energy>
5.0931703299284e-011

> <r_psp_Rec_Strain_Coulomb>
-1.09139364212751e-011

> <r_psp_Rec_Strain_Covalent>
4.09272615797818e-012

> <r_psp_Rec_Strain_Hbond>
-2.27373675443232e-013

> <r_psp_Rec_Strain_Lipo>
-2.72848410531878e-012

> <r_psp_Rec_Strain_Packing>
4.9737991503207e-014

> <r_psp_Rec_Strain_SelfCont>
7.105427357601e-015

> <r_psp_Rec_Strain_Solv_GB>
2.72848410531878e-012

> <r_psp_Rec_Strain_vdW>
4.54747350886464e-012

> <r_psp_Prime_MMGBSA_ligand_efficiency>
-1.64215695262325

> <r_psp_Prime_MMGBSA_ligand_efficiency_sa>
-2.46323542893487

> <r_psp_Prime_MMGBSA_ligand_efficiency_ln>
-10.027034471145

> <i_psp_ExecuteFunction_Internal_Entry_Index>
158

> <b_m_m_glide_XPvisualizer>
1

> <i_qp_#stars>
0

> <i_qp_#amine>
1

> <i_qp_#amidine>
0

> <i_qp_#acid>
0

> <i_qp_#amide>
0

> <i_qp_#rotor>
5

> <i_qp_#rtvFG>
0

> <i_qp_CNS>
0

> <r_qp_mol_MW>
   355.479

> <r_qp_dipole>
     7.739

> <r_qp_SASA>
   683.353

> <r_qp_FOSA>
   433.680

> <r_qp_FISA>
    84.113

> <r_qp_PISA>
   165.560

> <r_qp_WPSA>
     0.000

> <r_qp_volume>
  1208.889

> <r_qp_donorHB>
     3.000

> <r_qp_accptHB>
     6.200

> <r_qp_dip^2/V>
   0.0495421

> <r_qp_ACxDN^.5/SA>
   0.0157147

> <r_qp_glob>
   0.8031145

> <r_qp_QPpolrz>
    40.596

> <r_qp_QPlogPC16>
    11.911

> <r_qp_QPlogPoct>
    21.324

> <r_qp_QPlogPw>
    12.460

> <r_qp_QPlogPo/w>
     3.045

> <r_qp_QPlogS>
    -4.253

> <r_qp_CIQPlogS>
    -3.367

> <r_qp_QPlogHERG>
    -6.234

> <r_qp_QPPCaco>
   393.696

> <r_qp_QPlogBB>
    -0.209

> <r_qp_QPPMDCK>
   199.824

> <r_qp_QPlogKp>
    -4.069

> <r_qp_IP(eV)>
     8.457

> <r_qp_EA(eV)>
     0.462

> <i_qp_#metab>
3

> <r_qp_QPlogKhsa>
     0.384

> <i_qp_HumanOralAbsorption>
3

> <r_qp_PercentHumanOralAbsorption>
    91.221

> <r_qp_SAfluorine>
     0.000

> <r_qp_SAamideO>
     0.000

> <r_qp_PSA>
    74.311

> <i_qp_#NandO>
5

> <i_qp_RuleOfFive>
0

> <i_qp_RuleOfThree>
0

> <i_qp_#ringatoms>
21

> <i_qp_#in34>
0

> <i_qp_#in56>
21

> <i_qp_#noncon>
11

> <i_qp_#nonHatm>
26

> <r_qp_Jm>
0.00169365067624807

> <s_m_subgroupid>
1000_str-imp1->adme_1000-out12

> <s_m_subgroup_title>
1000_str->adme_1000-out1

> <b_m_subgroup_collapsed>
0

$$$$
GR-17
                    3D
 Structure written by MMmdl.
 55 58  0  0  1  0            999 V2000
   -3.3280    1.7629   -0.3206 C   0  0  0  0  0  0
   -2.2705    0.8512   -0.2273 C   0  0  0  0  0  0
   -0.9072    1.2577   -0.2095 C   0  0  0  0  0  0
   -0.6181    2.6309   -0.2938 C   0  0  0  0  0  0
   -1.6678    3.5426   -0.3909 C   0  0  0  0  0  0
   -2.9922    3.1143   -0.4023 C   0  0  0  0  0  0
   -0.0943    0.0738   -0.0915 C   0  0  0  0  0  0
   -0.9773   -1.0151   -0.0746 C   0  0  0  0  0  0
   -2.2639   -0.5195   -0.1336 N   0  0  0  0  0  0
    1.4264    0.0842   -0.0199 C   0  0  0  0  0  0
   -0.6801   -2.4262    0.0745 C   0  0  0  0  0  0
   -1.6718   -3.2624   -0.2962 N   0  0  0  0  0  0
   -1.6239   -4.7253   -0.2365 C   0  0  0  0  0  0
   -1.5923   -5.3243    1.1954 C   0  0  0  0  0  0
   -1.5858   -6.8656    1.2208 C   0  0  0  0  0  0
   -2.7088   -7.4690    0.3623 C   0  0  0  0  0  0
   -2.6490   -6.9443   -1.0816 C   0  0  0  0  0  0
   -2.6772   -5.4042   -1.1454 C   0  0  0  0  0  0
    0.4108   -2.8132    0.4947 O   0  0  0  0  0  0
    1.8891    0.5991    1.3651 N   0  3  0  0  0  0
    1.4800   -0.3632    2.5082 C   0  0  0  0  0  0
    1.9208    0.2383    3.8544 C   0  0  0  0  0  0
    3.4282    0.5412    3.8852 C   0  0  0  0  0  0
    3.8516    1.4285    2.7019 C   0  0  0  0  0  0
    3.4183    0.8349    1.3494 C   0  0  0  0  0  0
   -4.3603    1.4449   -0.3303 H   0  0  0  0  0  0
    0.4033    2.9821   -0.2838 H   0  0  0  0  0  0
   -1.4509    4.5989   -0.4568 H   0  0  0  0  0  0
   -3.7806    3.8492   -0.4767 H   0  0  0  0  0  0
   -3.0706   -1.1264   -0.1088 H   0  0  0  0  0  0
    1.9062   -0.8858   -0.1524 H   0  0  0  0  0  0
    1.8554    0.7736   -0.7486 H   0  0  0  0  0  0
   -2.5575   -2.8649   -0.5714 H   0  0  0  0  0  0
   -0.6672   -5.0111   -0.6819 H   0  0  0  0  0  0
   -0.7236   -4.9592    1.7446 H   0  0  0  0  0  0
   -2.4746   -4.9826    1.7389 H   0  0  0  0  0  0
   -0.6218   -7.2275    0.8596 H   0  0  0  0  0  0
   -1.6742   -7.2187    2.2490 H   0  0  0  0  0  0
   -2.6347   -8.5572    0.3658 H   0  0  0  0  0  0
   -3.6777   -7.2271    0.8018 H   0  0  0  0  0  0
   -1.7386   -7.3084   -1.5607 H   0  0  0  0  0  0
   -3.4785   -7.3537   -1.6595 H   0  0  0  0  0  0
   -3.6717   -5.0758   -0.8387 H   0  0  0  0  0  0
   -2.5449   -5.0851   -2.1804 H   0  0  0  0  0  0
    0.3976   -0.4850    2.4696 H   0  0  0  0  0  0
    1.9593   -1.3225    2.3057 H   0  0  0  0  0  0
    1.3563    1.1520    4.0467 H   0  0  0  0  0  0
    1.6669   -0.4495    4.6617 H   0  0  0  0  0  0
    3.6910    1.0262    4.8263 H   0  0  0  0  0  0
    3.9885   -0.3949    3.8585 H   0  0  0  0  0  0
    3.4225    2.4251    2.8159 H   0  0  0  0  0  0
    4.9338    1.5619    2.7114 H   0  0  0  0  0  0
    3.8895   -0.1296    1.1506 H   0  0  0  0  0  0
    3.6324    1.5186    0.5266 H   0  0  0  0  0  0
    1.4450    1.4905    1.5342 H   0  0  0  0  0  0
  1  2  1  0  0  0
  1  6  2  0  0  0
  1 26  1  0  0  0
  2  3  2  0  0  0
  2  9  1  0  0  0
  3  4  1  0  0  0
  3  7  1  0  0  0
  4  5  2  0  0  0
  4 27  1  0  0  0
  5  6  1  0  0  0
  5 28  1  0  0  0
  6 29  1  0  0  0
  7  8  2  0  0  0
  7 10  1  0  0  0
  8  9  1  0  0  0
  8 11  1  0  0  0
  9 30  1  0  0  0
 10 20  1  0  0  0
 10 31  1  0  0  0
 10 32  1  0  0  0
 11 12  1  0  0  0
 11 19  2  0  0  0
 12 13  1  0  0  0
 12 33  1  0  0  0
 13 18  1  0  0  0
 13 14  1  0  0  0
 13 34  1  0  0  0
 14 15  1  0  0  0
 14 35  1  0  0  0
 14 36  1  0  0  0
 15 16  1  0  0  0
 15 37  1  0  0  0
 15 38  1  0  0  0
 16 17  1  0  0  0
 16 39  1  0  0  0
 16 40  1  0  0  0
 17 18  1  0  0  0
 17 41  1  0  0  0
 17 42  1  0  0  0
 18 43  1  0  0  0
 18 44  1  0  0  0
 20 25  1  0  0  0
 20 21  1  0  0  0
 20 55  1  0  0  0
 21 22  1  0  0  0
 21 45  1  0  0  0
 21 46  1  0  0  0
 22 23  1  0  0  0
 22 47  1  0  0  0
 22 48  1  0  0  0
 23 24  1  0  0  0
 23 49  1  0  0  0
 23 50  1  0  0  0
 24 25  1  0  0  0
 24 51  1  0  0  0
 24 52  1  0  0  0
 25 53  1  0  0  0
 25 54  1  0  0  0
M  CHG  1  20   1
M  END
> <s_m_entry_id>
7720

> <s_m_entry_name>
entry

> <i_f3d_flags>
0

> <s_m_job_name>
adme_1000

> <r_psp_Prime_Energy>
-34931.6120755765

> <r_psp_Prime_Solv_GB>
-5281.71399156431

> <r_psp_Prime_Coulomb>
-26385.2543315736

> <r_psp_Prime_vdW>
-4519.81674742635

> <r_psp_Prime_Covalent>
4045.14804231227

> <i_psp_model_num>
0

> <r_psp_Prime_Lipo>
-2143.22833977759

> <s_psp_Prime_Energy_Force_Field>
OPLS3e

> <s_psp_Prime_Energy_Solvent_Model>
VSGB2.1

> <r_psp_Prime_Hbond>
-550.494173559436

> <r_psp_Prime_Packing>
-55.8446424272089

> <r_psp_Prime_SelfCont>
-40.4078915603482

> <r_psp_Memb1_x>
103.457542316003

> <r_psp_Memb1_y>
39.4731108300965

> <r_psp_Memb1_z>
48.7987221124676

> <r_psp_Memb2_x>
99.8134167309003

> <r_psp_Memb2_y>
2.81176945184187

> <r_psp_Memb2_z>
23.8404289603493

> <r_psp_MembDummyRadius>
4.45

> <r_psp_Prime_Bond_Covalent>
467.665321864229

> <r_psp_Prime_Bond_SGB>
49977.0713540652

> <r_psp_Prime_Angle_Covalent>
2228.43017986081

> <r_psp_Prime_Angle_SGB>
-21637.8011546912

> <r_psp_Prime_Torsion_Covalent>
1349.05254058723

> <r_psp_Prime_NB14_LJ>
4082.53099080521

> <r_psp_Prime_NB14_Lipo>
0

> <r_psp_Prime_NB14_Elec>
25562.5910485973

> <r_psp_Prime_NB14_SGB>
-15611.3063007902

> <r_psp_Prime_NBShort_LJ>
-8195.25720811045

> <r_psp_Prime_NBShort_Lipo>
-2143.22833977759

> <r_psp_Prime_NBShort_Elec>
-53013.8233844701

> <r_psp_Prime_NBShort_SGB>
17979.3142147239

> <r_psp_Prime_NBLong_LJ>
-407.090530121106

> <r_psp_Prime_NBLong_Lipo>
0

> <r_psp_Prime_NBLong_Elec>
1065.97800429919

> <r_psp_Prime_NBLong_SGB>
-1226.33225006486

> <r_psp_Prime_Self_SGB>
-34762.6598548072

> <s_m_Source_Path>
F:\Dekstop_files\DAC4,5\Molecular Systems Desgn and Engineering\supplementary_str

> <s_m_Source_File>
1000_str.mae

> <i_m_Source_File_Index>
644

> <i_lp_mmshare_version>
53156

> <s_epik_input>
W0NIMl0xW0NIMl1bQ0gyXVtDSDJdW0NIMl1OMVtDSDJdYyhjKGMyMylbY0hdW2NIXVtjSF1bY0hdMiljKFtuSF0zKUMoPU8pW05IXVtDSF00W0NIMl1bQ0gyXVtDSDJdW0NIMl1bQ0gyXTQ=

> <s_epik_cmdline>
J2VwaWtfcHl0aG9uJywgJy1waHQnLCAnMC4wJywgJy1waCcsICc3LjAnLCAnLXRuJywgJzgnLCAnLW1hJywgJzUwMCcsICctaW1hZScsICc8aW5maWxlLm1hZT4nLCAnLW9tYWUnLCAnPG91dGZpbGUubWFlPic=

> <r_lp_tautomer_probability>
1

> <r_epik_Ionization_Penalty>
  0.0118

> <r_epik_Ionization_Penalty_Charging>
  0.0118

> <r_epik_Ionization_Penalty_Neutral>
  0.0000

> <r_epik_State_Penalty>
  0.0000

> <r_epik_Charging_Adjusted_Penalty>
0.0117614320117395

> <i_epik_Tot_Q>
1

> <i_epik_Tot_abs_Q>
1

> <s_lp_Force_Field>
S-OPLS

> <r_lp_Energy>
42.598282

> <b_lp_Chiralities_Consistent>
1

> <s_lp_Variant>
GR-17-1

> <s_i_glide_gridfile>
glide-grid_1_oct_mmpl3_after_loop_refinement

> <i_i_glide_lignum>
14

> <i_i_glide_rotatable_bonds>
5

> <r_i_docking_score>
-6.34048346719644

> <r_i_glide_ligand_efficiency>
-0.253619338687858

> <r_i_glide_ligand_efficiency_sa>
-0.741587444281419

> <r_i_glide_ligand_efficiency_ln>
-1.50288459068229

> <r_glide_XP_GScore>
-6.34048346719644

> <r_i_glide_gscore>
-6.34048346719644

> <r_i_glide_evdw>
-38.9224853515625

> <r_i_glide_ecoul>
-1.30703663825989

> <r_i_glide_energy>
-40.2295219898224

> <r_i_glide_einternal>
11.4484977722168

> <r_i_glide_emodel>
-45.4965516608408

> <r_glide_XP_HBond>
0

> <r_glide_XP_PhobEn>
-2.44100021584475

> <r_glide_XP_PhobEnHB>
0

> <r_glide_XP_LowMW>
-0.365058666666666

> <r_glide_XP_RotPenal>
0.35005484484228

> <r_glide_XP_LipophilicEvdW>
-6.53631993527603

> <r_glide_XP_PhobEnPairHB>
0

> <r_glide_XP_Electro>
-0.0980277478694916

> <r_glide_XP_Sitemap>
-0.25344086589107

> <r_glide_XP_Penalties>
3.00330911950928

> <r_glide_XP_PiStack>
0

> <r_glide_XP_HBPenal>
0

> <r_glide_XP_ExposPenal>
0

> <r_glide_XP_PiCat>
0

> <r_glide_XP_ClBr>
0

> <r_glide_XP_Zpotr>
0

> <i_i_glide_confnum>
1

> <i_i_glide_posenum>
1

> <r_i_glide_eff_state_penalty>
0

> <i_glide_XP_PoseRank>
1

> <r_i_glide_rmsd_to_input>
109.563937269966

> <s_psp_Prime_MMGBSA_Input_Structure_Hash>
b539836638341e816bed1aebc3d083e96cccfd189f5f107b1d2a8df3

> <i_psp_number_heavy_atoms>
25

> <r_psp_MMGBSA_dG_Bind>
-54.200893260022

> <r_psp_MMGBSA_dG_Bind_Coulomb>
58.1176797425978

> <r_psp_MMGBSA_dG_Bind_Covalent>
9.57893435365895

> <r_psp_MMGBSA_dG_Bind_Hbond>
-0.39656847625497

> <r_psp_MMGBSA_dG_Bind_Lipo>
-28.0592133919718

> <r_psp_MMGBSA_dG_Bind_Packing>
4.9737991503207e-014

> <r_psp_MMGBSA_dG_Bind_SelfCont>
7.105427357601e-015

> <r_psp_MMGBSA_dG_Bind_Solv_GB>
-53.5455260661547

> <r_psp_MMGBSA_dG_Bind_vdW>
-39.896199421958

> <r_psp_Lig_Strain_Energy>
16.1714690987378

> <r_psp_Lig_Strain_Coulomb>
2.95043672430494

> <r_psp_Lig_Strain_Covalent>
9.57913522177137

> <r_psp_Lig_Strain_Hbond>
0

> <r_psp_Lig_Strain_Lipo>
-0.137761170241298

> <r_psp_Lig_Strain_Packing>
0

> <r_psp_Lig_Strain_SelfCont>
0

> <r_psp_Lig_Strain_Solv_GB>
-1.6254898145237

> <r_psp_Lig_Strain_vdW>
5.40514813742649

> <r_psp_Ligand_Energy>
36.3355944742893

> <r_psp_Ligand_Coulomb>
17.2664171099183

> <r_psp_Ligand_Covalent>
26.4137669893856

> <r_psp_Ligand_Hbond>
0

> <r_psp_Ligand_Lipo>
-1.68589823253618

> <r_psp_Ligand_Packing>
0

> <r_psp_Ligand_SelfCont>
0

> <r_psp_Ligand_Solv_GB>
-18.3441342601412

> <r_psp_Ligand_vdW>
12.6854428676628

> <r_psp_Complex_Energy>
-34931.6120755765

> <r_psp_Complex_Coulomb>
-26385.2543315736

> <r_psp_Complex_Covalent>
4045.14804231227

> <r_psp_Complex_Hbond>
-550.494173559436

> <r_psp_Complex_Lipo>
-2143.22833977759

> <r_psp_Complex_Packing>
-55.8446424272089

> <r_psp_Complex_SelfCont>
-40.4078915603482

> <r_psp_Complex_Solv_GB>
-5281.71399156431

> <r_psp_Complex_vdW>
-4519.81674742635

> <r_psp_Receptor_Energy>
-34913.7467767908

> <r_psp_Receptor_Coulomb>
-26460.6384284261

> <r_psp_Receptor_Covalent>
4009.15534096923

> <r_psp_Receptor_Hbond>
-550.097605083181

> <r_psp_Receptor_Lipo>
-2113.48322815308

> <r_psp_Receptor_Packing>
-55.8446424272089

> <r_psp_Receptor_SelfCont>
-40.4078915603482

> <r_psp_Receptor_Solv_GB>
-5209.82433123801

> <r_psp_Receptor_vdW>
-4492.60599087205

> <r_psp_MMGBSA_dG_Bind(NS)>
-70.3723623588157

> <r_psp_MMGBSA_dG_Bind(NS)_Coulomb>
55.1672430183025

> <r_psp_MMGBSA_dG_Bind(NS)_Covalent>
-0.000200868116280617

> <r_psp_MMGBSA_dG_Bind(NS)_Hbond>
-0.396568476254743

> <r_psp_MMGBSA_dG_Bind(NS)_Lipo>
-27.9214522217276

> <r_psp_MMGBSA_dG_Bind(NS)_Packing>
0

> <r_psp_MMGBSA_dG_Bind(NS)_SelfCont>
0

> <r_psp_MMGBSA_dG_Bind(NS)_Solv_GB>
-51.9200362516331

> <r_psp_MMGBSA_dG_Bind(NS)_vdW>
-45.3013475593898

> <r_psp_Rec_Strain_Energy>
5.0931703299284e-011

> <r_psp_Rec_Strain_Coulomb>
-1.09139364212751e-011

> <r_psp_Rec_Strain_Covalent>
4.09272615797818e-012

> <r_psp_Rec_Strain_Hbond>
-2.27373675443232e-013

> <r_psp_Rec_Strain_Lipo>
-2.72848410531878e-012

> <r_psp_Rec_Strain_Packing>
4.9737991503207e-014

> <r_psp_Rec_Strain_SelfCont>
7.105427357601e-015

> <r_psp_Rec_Strain_Solv_GB>
2.72848410531878e-012

> <r_psp_Rec_Strain_vdW>
4.54747350886464e-012

> <r_psp_Prime_MMGBSA_ligand_efficiency>
-2.16803573040088

> <r_psp_Prime_MMGBSA_ligand_efficiency_sa>
-3.25205359560132

> <r_psp_Prime_MMGBSA_ligand_efficiency_ln>
-12.8472359723257

> <i_psp_ExecuteFunction_Internal_Entry_Index>
176

> <b_m_m_glide_XPvisualizer>
1

> <i_qp_#stars>
0

> <i_qp_#amine>
1

> <i_qp_#amidine>
0

> <i_qp_#acid>
0

> <i_qp_#amide>
0

> <i_qp_#rotor>
4

> <i_qp_#rtvFG>
0

> <i_qp_CNS>
1

> <r_qp_mol_MW>
   339.480

> <r_qp_dipole>
     5.808

> <r_qp_SASA>
   675.413

> <r_qp_FOSA>
   466.115

> <r_qp_FISA>
    42.329

> <r_qp_PISA>
   166.969

> <r_qp_WPSA>
     0.000

> <r_qp_volume>
  1191.478

> <r_qp_donorHB>
     2.000

> <r_qp_accptHB>
     4.500

> <r_qp_dip^2/V>
   0.0283148

> <r_qp_ACxDN^.5/SA>
   0.0094223

> <r_qp_glob>
   0.8047356

> <r_qp_QPpolrz>
    40.555

> <r_qp_QPlogPC16>
    11.230

> <r_qp_QPlogPoct>
    18.477

> <r_qp_QPlogPw>
     9.248

> <r_qp_QPlogPo/w>
     4.071

> <r_qp_QPlogS>
    -4.928

> <r_qp_CIQPlogS>
    -3.741

> <r_qp_QPlogHERG>
    -6.214

> <r_qp_QPPCaco>
   980.381

> <r_qp_QPlogBB>
     0.285

> <r_qp_QPPMDCK>
   535.709

> <r_qp_QPlogKp>
    -3.390

> <r_qp_IP(eV)>
     8.331

> <r_qp_EA(eV)>
     0.375

> <i_qp_#metab>
2

> <r_qp_QPlogKhsa>
     0.742

> <i_qp_HumanOralAbsorption>
3

> <r_qp_PercentHumanOralAbsorption>
   100.000

> <r_qp_SAfluorine>
     0.000

> <r_qp_SAamideO>
     0.000

> <r_qp_PSA>
    52.640

> <i_qp_#NandO>
4

> <i_qp_RuleOfFive>
0

> <i_qp_RuleOfThree>
0

> <i_qp_#ringatoms>
21

> <i_qp_#in34>
0

> <i_qp_#in56>
21

> <i_qp_#noncon>
11

> <i_qp_#nonHatm>
25

> <r_qp_Jm>
0.0016322459026627

> <s_m_subgroupid>
1000_str-imp1->adme_1000-out12

> <s_m_subgroup_title>
1000_str->adme_1000-out1

> <b_m_subgroup_collapsed>
0

$$$$
GR-19
                    3D
 Structure written by MMmdl.
 54 56  0  0  1  0            999 V2000
   -1.6628    4.6827    1.7190 C   0  0  0  0  0  0
   -1.2917    3.6439    0.8579 C   0  0  0  0  0  0
   -0.9592    2.3416    1.3254 C   0  0  0  0  0  0
   -1.0124    2.0955    2.7087 C   0  0  0  0  0  0
   -1.3840    3.1261    3.5701 C   0  0  0  0  0  0
   -1.7005    4.3909    3.0825 C   0  0  0  0  0  0
   -0.6144    1.5366    0.1805 C   0  0  0  0  0  0
   -0.7804    2.3539   -0.9456 C   0  0  0  0  0  0
   -1.1612    3.6066   -0.5092 N   0  0  0  0  0  0
   -0.1931    0.0748    0.2455 C   0  0  0  0  0  0
   -0.5336    2.0372   -2.3397 C   0  0  0  0  0  0
   -1.0211    2.9291   -3.2265 N   0  0  0  0  0  0
   -0.8781    2.8555   -4.6821 C   0  0  0  0  0  0
   -1.9320    3.7028   -5.4355 C   0  0  0  0  0  0
   -1.7786    3.6658   -6.9688 C   0  0  0  0  0  0
   -0.3457    3.9939   -7.4180 C   0  0  0  0  0  0
    0.6755    3.0629   -6.7449 C   0  0  0  0  0  0
    0.5645    3.0850   -5.2076 C   0  0  0  0  0  0
    0.0704    1.0156   -2.6693 O   0  0  0  0  0  0
    1.3313   -0.0682   -0.0052 N   0  3  0  0  0  0
    1.7412   -1.5437   -0.2500 C   0  0  0  0  0  0
    1.2735   -2.0364   -1.6303 C   0  0  0  0  0  0
    2.1853    0.5996    1.1049 C   0  0  0  0  0  0
    3.6120    0.8953    0.6114 C   0  0  0  0  0  0
   -1.9109    5.6688    1.3548 H   0  0  0  0  0  0
   -0.7673    1.1222    3.1073 H   0  0  0  0  0  0
   -1.4262    2.9419    4.6337 H   0  0  0  0  0  0
   -1.9832    5.1666    3.7795 H   0  0  0  0  0  0
   -1.3166    4.3703   -1.1510 H   0  0  0  0  0  0
   -0.3786   -0.4035    1.2086 H   0  0  0  0  0  0
   -0.6924   -0.5090   -0.5255 H   0  0  0  0  0  0
   -1.4597    3.7662   -2.8727 H   0  0  0  0  0  0
   -1.1185    1.8259   -4.9603 H   0  0  0  0  0  0
   -2.9388    3.3780   -5.1676 H   0  0  0  0  0  0
   -1.8398    4.7429   -5.1180 H   0  0  0  0  0  0
   -2.0543    2.6756   -7.3353 H   0  0  0  0  0  0
   -2.4802    4.3637   -7.4278 H   0  0  0  0  0  0
   -0.2675    3.9099   -8.5027 H   0  0  0  0  0  0
   -0.1131    5.0318   -7.1746 H   0  0  0  0  0  0
    0.5242    2.0428   -7.1016 H   0  0  0  0  0  0
    1.6861    3.3412   -7.0465 H   0  0  0  0  0  0
    0.9127    4.0595   -4.8615 H   0  0  0  0  0  0
    1.2460    2.3413   -4.7924 H   0  0  0  0  0  0
    2.8278   -1.5806   -0.2043 H   0  0  0  0  0  0
    1.3350   -2.1246    0.5798 H   0  0  0  0  0  0
    1.6784   -3.0278   -1.8346 H   0  0  0  0  0  0
    1.6167   -1.3756   -2.4274 H   0  0  0  0  0  0
    0.1897   -2.1186   -1.7035 H   0  0  0  0  0  0
    1.6969    1.5389    1.3585 H   0  0  0  0  0  0
    2.1486   -0.0624    1.9716 H   0  0  0  0  0  0
    4.1570    1.4736    1.3578 H   0  0  0  0  0  0
    3.6003    1.4820   -0.3081 H   0  0  0  0  0  0
    4.1926   -0.0079    0.4286 H   0  0  0  0  0  0
    1.5243    0.4334   -0.8612 H   0  0  0  0  0  0
  1  2  1  0  0  0
  1  6  2  0  0  0
  1 25  1  0  0  0
  2  3  2  0  0  0
  2  9  1  0  0  0
  3  4  1  0  0  0
  3  7  1  0  0  0
  4  5  2  0  0  0
  4 26  1  0  0  0
  5  6  1  0  0  0
  5 27  1  0  0  0
  6 28  1  0  0  0
  7  8  2  0  0  0
  7 10  1  0  0  0
  8  9  1  0  0  0
  8 11  1  0  0  0
  9 29  1  0  0  0
 10 20  1  0  0  0
 10 30  1  0  0  0
 10 31  1  0  0  0
 11 12  1  0  0  0
 11 19  2  0  0  0
 12 13  1  0  0  0
 12 32  1  0  0  0
 13 18  1  0  0  0
 13 14  1  0  0  0
 13 33  1  0  0  0
 14 15  1  0  0  0
 14 34  1  0  0  0
 14 35  1  0  0  0
 15 16  1  0  0  0
 15 36  1  0  0  0
 15 37  1  0  0  0
 16 17  1  0  0  0
 16 38  1  0  0  0
 16 39  1  0  0  0
 17 18  1  0  0  0
 17 40  1  0  0  0
 17 41  1  0  0  0
 18 42  1  0  0  0
 18 43  1  0  0  0
 20 21  1  0  0  0
 20 23  1  0  0  0
 20 54  1  0  0  0
 21 22  1  0  0  0
 21 44  1  0  0  0
 21 45  1  0  0  0
 22 46  1  0  0  0
 22 47  1  0  0  0
 22 48  1  0  0  0
 23 24  1  0  0  0
 23 49  1  0  0  0
 23 50  1  0  0  0
 24 51  1  0  0  0
 24 52  1  0  0  0
 24 53  1  0  0  0
M  CHG  1  20   1
M  END
> <s_m_entry_id>
7721

> <s_m_entry_name>
entry

> <i_f3d_flags>
0

> <s_m_job_name>
adme_1000

> <r_psp_Prime_Energy>
-34944.1973638949

> <r_psp_Prime_Solv_GB>
-5293.42714362139

> <r_psp_Prime_Coulomb>
-26386.1343264428

> <r_psp_Prime_vdW>
-4524.50451823349

> <r_psp_Prime_Covalent>
4048.62858710176

> <i_psp_model_num>
0

> <r_psp_Prime_Lipo>
-2142.39128511239

> <s_psp_Prime_Energy_Force_Field>
OPLS3e

> <s_psp_Prime_Energy_Solvent_Model>
VSGB2.1

> <r_psp_Prime_Hbond>
-550.10834359243

> <r_psp_Prime_Packing>
-55.8524424338897

> <r_psp_Prime_SelfCont>
-40.4078915603482

> <r_psp_Memb1_x>
103.457542316003

> <r_psp_Memb1_y>
39.4731108300965

> <r_psp_Memb1_z>
48.7987221124676

> <r_psp_Memb2_x>
99.8134167309003

> <r_psp_Memb2_y>
2.81176945184187

> <r_psp_Memb2_z>
23.8404289603493

> <r_psp_MembDummyRadius>
4.45

> <r_psp_Prime_Bond_Covalent>
467.930834636483

> <r_psp_Prime_Bond_SGB>
49979.3626046222

> <r_psp_Prime_Angle_Covalent>
2236.25491839364

> <r_psp_Prime_Angle_SGB>
-21642.0880552529

> <r_psp_Prime_Torsion_Covalent>
1344.44283407164

> <r_psp_Prime_NB14_LJ>
4077.59019525183

> <r_psp_Prime_NB14_Lipo>
0

> <r_psp_Prime_NB14_Elec>
25560.9196696075

> <r_psp_Prime_NB14_SGB>
-15610.821841523

> <r_psp_Prime_NBShort_LJ>
-8194.56191972123

> <r_psp_Prime_NBShort_Lipo>
-2142.39128511239

> <r_psp_Prime_NBShort_Elec>
-53030.4150401276

> <r_psp_Prime_NBShort_SGB>
17989.6632444453

> <r_psp_Prime_NBLong_LJ>
-407.532793764093

> <r_psp_Prime_NBLong_Lipo>
0

> <r_psp_Prime_NBLong_Elec>
1083.36104407741

> <r_psp_Prime_NBLong_SGB>
-1246.00960965528

> <r_psp_Prime_Self_SGB>
-34763.5334862578

> <s_m_Source_Path>
F:\Dekstop_files\DAC4,5\Molecular Systems Desgn and Engineering\supplementary_str

> <s_m_Source_File>
1000_str.mae

> <i_m_Source_File_Index>
645

> <i_lp_mmshare_version>
53156

> <s_epik_input>
W2NIXTFbY0hdW2NIXVtjSF1jKGMxMiljKFtDSDJdTihbQ0gyXVtDSDNdKVtDSDJdW0NIM10pYyhbbkhdMilDKD1PKVtOSF1bQ0hdM1tDSDJdW0NIMl1bQ0gyXVtDSDJdW0NIMl0z

> <s_epik_cmdline>
J2VwaWtfcHl0aG9uJywgJy1waHQnLCAnMC4wJywgJy1waCcsICc3LjAnLCAnLXRuJywgJzgnLCAnLW1hJywgJzUwMCcsICctaW1hZScsICc8aW5maWxlLm1hZT4nLCAnLW9tYWUnLCAnPG91dGZpbGUubWFlPic=

> <r_lp_tautomer_probability>
1

> <r_epik_Ionization_Penalty>
  0.0239

> <r_epik_Ionization_Penalty_Charging>
  0.0239

> <r_epik_Ionization_Penalty_Neutral>
  0.0000

> <r_epik_State_Penalty>
  0.0000

> <r_epik_Charging_Adjusted_Penalty>
0.0238779594741381

> <i_epik_Tot_Q>
1

> <i_epik_Tot_abs_Q>
1

> <s_lp_Force_Field>
S-OPLS

> <r_lp_Energy>
39.885037

> <b_lp_Chiralities_Consistent>
1

> <s_lp_Variant>
GR-19-1

> <s_i_glide_gridfile>
glide-grid_1_oct_mmpl3_after_loop_refinement

> <i_i_glide_lignum>
16

> <i_i_glide_rotatable_bonds>
7

> <r_i_docking_score>
-5.98250577847747

> <r_i_glide_ligand_efficiency>
-0.249271074103228

> <r_i_glide_ligand_efficiency_sa>
-0.719022198269196

> <r_i_glide_ligand_efficiency_ln>
-1.43188815209191

> <r_glide_XP_GScore>
-5.98250577847747

> <r_i_glide_gscore>
-5.98250577847747

> <r_i_glide_evdw>
-36.7783012390137

> <r_i_glide_ecoul>
-0.931939840316772

> <r_i_glide_energy>
-37.7102410793304

> <r_i_glide_einternal>
7.06909370422363

> <r_i_glide_emodel>
-37.2467276226439

> <r_glide_XP_HBond>
0

> <r_glide_XP_PhobEn>
-2.32930140190346

> <r_glide_XP_PhobEnHB>
0

> <r_glide_XP_LowMW>
-0.405094333333332

> <r_glide_XP_RotPenal>
0.373026100128801

> <r_glide_XP_LipophilicEvdW>
-6.28797088278556

> <r_glide_XP_PhobEnPairHB>
0

> <r_glide_XP_Electro>
-0.0698954880237579

> <r_glide_XP_Sitemap>
-0.263430302946096

> <r_glide_XP_Penalties>
3.00016053038594

> <r_glide_XP_PiStack>
0

> <r_glide_XP_HBPenal>
0

> <r_glide_XP_ExposPenal>
0

> <r_glide_XP_PiCat>
0

> <r_glide_XP_ClBr>
0

> <r_glide_XP_Zpotr>
0

> <i_i_glide_confnum>
1

> <i_i_glide_posenum>
105

> <r_i_glide_eff_state_penalty>
0

> <i_glide_XP_PoseRank>
1

> <r_i_glide_rmsd_to_input>
110.713809555443

> <s_psp_Prime_MMGBSA_Input_Structure_Hash>
4474cae390a49b47326f302e70d835478b17f266d907c7497cbf9d3f

> <i_psp_number_heavy_atoms>
24

> <r_psp_MMGBSA_dG_Bind>
-52.8433160913264

> <r_psp_MMGBSA_dG_Bind_Coulomb>
71.0778495890809

> <r_psp_MMGBSA_dG_Bind_Covalent>
12.2085073969251

> <r_psp_MMGBSA_dG_Bind_Hbond>
-0.0107385092487675

> <r_psp_MMGBSA_dG_Bind_Lipo>
-26.1531487038237

> <r_psp_MMGBSA_dG_Bind_Packing>
-0.00780000668077463

> <r_psp_MMGBSA_dG_Bind_SelfCont>
7.105427357601e-015

> <r_psp_MMGBSA_dG_Bind_Solv_GB>
-67.6751214438927

> <r_psp_MMGBSA_dG_Bind_vdW>
-42.2828644137535

> <r_psp_Lig_Strain_Energy>
13.4569796197226

> <r_psp_Lig_Strain_Coulomb>
1.30912807471029

> <r_psp_Lig_Strain_Covalent>
12.2087082650373

> <r_psp_Lig_Strain_Hbond>
0

> <r_psp_Lig_Strain_Lipo>
-0.418157658595993

> <r_psp_Lig_Strain_Packing>
0

> <r_psp_Lig_Strain_SelfCont>
0

> <r_psp_Lig_Strain_Solv_GB>
-0.715185887381935

> <r_psp_Lig_Strain_vdW>
1.07248682595285

> <r_psp_Ligand_Energy>
22.3927289871984

> <r_psp_Ligand_Coulomb>
3.42625239425259

> <r_psp_Ligand_Covalent>
27.2647387356064

> <r_psp_Ligand_Hbond>
0

> <r_psp_Ligand_Lipo>
-2.75490825548758

> <r_psp_Ligand_Packing>
0

> <r_psp_Ligand_SelfCont>
0

> <r_psp_Ligand_Solv_GB>
-15.9276909394832

> <r_psp_Ligand_vdW>
10.3843370523102

> <r_psp_Complex_Energy>
-34944.1973638949

> <r_psp_Complex_Coulomb>
-26386.1343264428

> <r_psp_Complex_Covalent>
4048.62858710176

> <r_psp_Complex_Hbond>
-550.10834359243

> <r_psp_Complex_Lipo>
-2142.39128511239

> <r_psp_Complex_Packing>
-55.8524424338897

> <r_psp_Complex_SelfCont>
-40.4078915603482

> <r_psp_Complex_Solv_GB>
-5293.42714362139

> <r_psp_Complex_vdW>
-4524.50451823349

> <r_psp_Receptor_Energy>
-34913.7467767908

> <r_psp_Receptor_Coulomb>
-26460.6384284261

> <r_psp_Receptor_Covalent>
4009.15534096923

> <r_psp_Receptor_Hbond>
-550.097605083181

> <r_psp_Receptor_Lipo>
-2113.48322815308

> <r_psp_Receptor_Packing>
-55.8446424272089

> <r_psp_Receptor_SelfCont>
-40.4078915603482

> <r_psp_Receptor_Solv_GB>
-5209.82433123801

> <r_psp_Receptor_vdW>
-4492.60599087205

> <r_psp_MMGBSA_dG_Bind(NS)>
-66.3002957110948

> <r_psp_MMGBSA_dG_Bind(NS)_Coulomb>
69.7687215143815

> <r_psp_MMGBSA_dG_Bind(NS)_Covalent>
-0.000200868116280617

> <r_psp_MMGBSA_dG_Bind(NS)_Hbond>
-0.0107385092485401

> <r_psp_MMGBSA_dG_Bind(NS)_Lipo>
-25.7349910452249

> <r_psp_MMGBSA_dG_Bind(NS)_Packing>
-0.00780000668082437

> <r_psp_MMGBSA_dG_Bind(NS)_SelfCont>
0

> <r_psp_MMGBSA_dG_Bind(NS)_Solv_GB>
-66.9599355565133

> <r_psp_MMGBSA_dG_Bind(NS)_vdW>
-43.3553512397111

> <r_psp_Rec_Strain_Energy>
5.0931703299284e-011

> <r_psp_Rec_Strain_Coulomb>
-1.09139364212751e-011

> <r_psp_Rec_Strain_Covalent>
4.09272615797818e-012

> <r_psp_Rec_Strain_Hbond>
-2.27373675443232e-013

> <r_psp_Rec_Strain_Lipo>
-2.72848410531878e-012

> <r_psp_Rec_Strain_Packing>
4.9737991503207e-014

> <r_psp_Rec_Strain_SelfCont>
7.105427357601e-015

> <r_psp_Rec_Strain_Solv_GB>
2.72848410531878e-012

> <r_psp_Rec_Strain_vdW>
4.54747350886464e-012

> <r_psp_Prime_MMGBSA_ligand_efficiency>
-2.2018048371386

> <r_psp_Prime_MMGBSA_ligand_efficiency_sa>
-3.3027072557079

> <r_psp_Prime_MMGBSA_ligand_efficiency_ln>
-12.6478303624263

> <i_psp_ExecuteFunction_Internal_Entry_Index>
186

> <b_m_m_glide_XPvisualizer>
1

> <i_qp_#stars>
0

> <i_qp_#amine>
1

> <i_qp_#amidine>
0

> <i_qp_#acid>
0

> <i_qp_#amide>
0

> <i_qp_#rotor>
6

> <i_qp_#rtvFG>
0

> <i_qp_CNS>
1

> <r_qp_mol_MW>
   327.469

> <r_qp_dipole>
     5.736

> <r_qp_SASA>
   675.904

> <r_qp_FOSA>
   473.558

> <r_qp_FISA>
    34.454

> <r_qp_PISA>
   167.892

> <r_qp_WPSA>
     0.000

> <r_qp_volume>
  1183.380

> <r_qp_donorHB>
     2.000

> <r_qp_accptHB>
     4.500

> <r_qp_dip^2/V>
   0.0278049

> <r_qp_ACxDN^.5/SA>
   0.0094155

> <r_qp_glob>
   0.8005028

> <r_qp_QPpolrz>
    38.956

> <r_qp_QPlogPC16>
    11.109

> <r_qp_QPlogPoct>
    17.786

> <r_qp_QPlogPw>
     8.760

> <r_qp_QPlogPo/w>
     4.073

> <r_qp_QPlogS>
    -4.611

> <r_qp_CIQPlogS>
    -3.467

> <r_qp_QPlogHERG>
    -6.287

> <r_qp_QPPCaco>
  1164.327

> <r_qp_QPlogBB>
     0.242

> <r_qp_QPPMDCK>
   645.133

> <r_qp_QPlogKp>
    -3.050

> <r_qp_IP(eV)>
     8.364

> <r_qp_EA(eV)>
     0.379

> <i_qp_#metab>
2

> <r_qp_QPlogKhsa>
     0.634

> <i_qp_HumanOralAbsorption>
3

> <r_qp_PercentHumanOralAbsorption>
   100.000

> <r_qp_SAfluorine>
     0.000

> <r_qp_SAamideO>
     0.000

> <r_qp_PSA>
    51.532

> <i_qp_#NandO>
4

> <i_qp_RuleOfFive>
0

> <i_qp_RuleOfThree>
0

> <i_qp_#ringatoms>
15

> <i_qp_#in34>
0

> <i_qp_#in56>
15

> <i_qp_#noncon>
6

> <i_qp_#nonHatm>
24

> <r_qp_Jm>
0.00715362052656693

> <s_m_subgroupid>
1000_str-imp1->adme_1000-out12

> <s_m_subgroup_title>
1000_str->adme_1000-out1

> <b_m_subgroup_collapsed>
0

$$$$
GR-20
                    3D
 Structure written by MMmdl.
 51 53  0  0  1  0            999 V2000
   -0.7461    5.0345   -1.4377 C   0  0  0  0  0  0
   -0.8266    3.8355   -0.7209 C   0  0  0  0  0  0
   -0.2671    2.6171   -1.1988 C   0  0  0  0  0  0
    0.3904    2.6267   -2.4415 C   0  0  0  0  0  0
    0.4741    3.8190   -3.1585 C   0  0  0  0  0  0
   -0.0830    4.9950   -2.6642 C   0  0  0  0  0  0
   -0.5277    1.5970   -0.2146 C   0  0  0  0  0  0
   -1.2435    2.2145    0.8201 C   0  0  0  0  0  0
   -1.3948    3.5474    0.4965 N   0  0  0  0  0  0
   -0.0995    0.1465   -0.3425 C   0  0  0  0  0  0
   -1.6928    1.6434    2.0752 C   0  0  0  0  0  0
   -2.5835    2.3891    2.7611 N   0  0  0  0  0  0
   -3.1496    2.0565    4.0705 C   0  0  0  0  0  0
   -2.1381    2.0947    5.2479 C   0  0  0  0  0  0
   -2.7723    1.7920    6.6194 C   0  0  0  0  0  0
   -4.0125    2.6580    6.8915 C   0  0  0  0  0  0
   -5.0498    2.5102    5.7666 C   0  0  0  0  0  0
   -4.4557    2.8279    4.3800 C   0  0  0  0  0  0
   -1.2777    0.5514    2.4667 O   0  0  0  0  0  0
    1.2292   -0.0192    0.4134 N   0  3  0  0  0  0
    1.7727   -1.4585    0.5073 C   0  0  0  0  0  0
    2.9107   -1.4718    1.5415 C   0  0  0  0  0  0
    2.2244   -1.9502   -0.8811 C   0  0  0  0  0  0
   -1.1737    5.9545   -1.0665 H   0  0  0  0  0  0
    0.8298    1.7249   -2.8419 H   0  0  0  0  0  0
    0.9796    3.8320   -4.1133 H   0  0  0  0  0  0
    0.0012    5.9010   -3.2467 H   0  0  0  0  0  0
   -1.8669    4.1953    1.1102 H   0  0  0  0  0  0
   -0.7876   -0.5602    0.1231 H   0  0  0  0  0  0
    0.0916   -0.1622   -1.3699 H   0  0  0  0  0  0
   -2.8391    3.2925    2.3913 H   0  0  0  0  0  0
   -3.4674    1.0125    4.0058 H   0  0  0  0  0  0
   -1.3204    1.3941    5.0744 H   0  0  0  0  0  0
   -1.6943    3.0904    5.2962 H   0  0  0  0  0  0
   -3.0515    0.7380    6.6623 H   0  0  0  0  0  0
   -2.0349    1.9411    7.4091 H   0  0  0  0  0  0
   -4.4578    2.3801    7.8476 H   0  0  0  0  0  0
   -3.7171    3.7044    6.9840 H   0  0  0  0  0  0
   -5.4402    1.4912    5.7676 H   0  0  0  0  0  0
   -5.9034    3.1605    5.9619 H   0  0  0  0  0  0
   -4.2489    3.8988    4.3450 H   0  0  0  0  0  0
   -5.2050    2.6255    3.6132 H   0  0  0  0  0  0
    0.9304   -2.0446    0.8790 H   0  0  0  0  0  0
    3.2999   -2.4816    1.6770 H   0  0  0  0  0  0
    2.5704   -1.1254    2.5188 H   0  0  0  0  0  0
    3.7454   -0.8390    1.2352 H   0  0  0  0  0  0
    2.6516   -2.9515   -0.8152 H   0  0  0  0  0  0
    2.9860   -1.2992   -1.3129 H   0  0  0  0  0  0
    1.3949   -2.0102   -1.5857 H   0  0  0  0  0  0
    1.9299    0.5720   -0.0104 H   0  0  0  0  0  0
    1.0768    0.3109    1.3562 H   0  0  0  0  0  0
  1  2  1  0  0  0
  1  6  2  0  0  0
  1 24  1  0  0  0
  2  3  2  0  0  0
  2  9  1  0  0  0
  3  4  1  0  0  0
  3  7  1  0  0  0
  4  5  2  0  0  0
  4 25  1  0  0  0
  5  6  1  0  0  0
  5 26  1  0  0  0
  6 27  1  0  0  0
  7  8  2  0  0  0
  7 10  1  0  0  0
  8  9  1  0  0  0
  8 11  1  0  0  0
  9 28  1  0  0  0
 10 20  1  0  0  0
 10 29  1  0  0  0
 10 30  1  0  0  0
 11 12  1  0  0  0
 11 19  2  0  0  0
 12 13  1  0  0  0
 12 31  1  0  0  0
 13 18  1  0  0  0
 13 14  1  0  0  0
 13 32  1  0  0  0
 14 15  1  0  0  0
 14 33  1  0  0  0
 14 34  1  0  0  0
 15 16  1  0  0  0
 15 35  1  0  0  0
 15 36  1  0  0  0
 16 17  1  0  0  0
 16 37  1  0  0  0
 16 38  1  0  0  0
 17 18  1  0  0  0
 17 39  1  0  0  0
 17 40  1  0  0  0
 18 41  1  0  0  0
 18 42  1  0  0  0
 20 21  1  0  0  0
 20 50  1  0  0  0
 20 51  1  0  0  0
 21 22  1  0  0  0
 21 23  1  0  0  0
 21 43  1  0  0  0
 22 44  1  0  0  0
 22 45  1  0  0  0
 22 46  1  0  0  0
 23 47  1  0  0  0
 23 48  1  0  0  0
 23 49  1  0  0  0
M  CHG  1  20   1
M  END
> <s_m_entry_id>
7554

> <s_m_entry_name>
entry

> <i_f3d_flags>
0

> <s_m_job_name>
adme_1000

> <r_psp_Prime_Energy>
-34938.5970322005

> <r_psp_Prime_Solv_GB>
-5303.80950574645

> <r_psp_Prime_Coulomb>
-26380.6257202093

> <r_psp_Prime_vdW>
-4504.94964427065

> <r_psp_Prime_Covalent>
4039.90336526863

> <i_psp_model_num>
0

> <r_psp_Prime_Lipo>
-2140.20769918068

> <s_psp_Prime_Energy_Force_Field>
OPLS3e

> <s_psp_Prime_Energy_Solvent_Model>
VSGB2.1

> <r_psp_Prime_Hbond>
-550.669890081853

> <r_psp_Prime_Packing>
-57.8300464197999

> <r_psp_Prime_SelfCont>
-40.4078915603482

> <r_psp_Memb1_x>
103.457542316003

> <r_psp_Memb1_y>
39.4731108300965

> <r_psp_Memb1_z>
48.7987221124676

> <r_psp_Memb2_x>
99.8134167309003

> <r_psp_Memb2_y>
2.81176945184187

> <r_psp_Memb2_z>
23.8404289603493

> <r_psp_MembDummyRadius>
4.45

> <r_psp_Prime_Bond_Covalent>
467.797673506537

> <r_psp_Prime_Bond_SGB>
49983.2269592912

> <r_psp_Prime_Angle_Covalent>
2225.41045921882

> <r_psp_Prime_Angle_SGB>
-21645.3028756481

> <r_psp_Prime_Torsion_Covalent>
1346.69523254328

> <r_psp_Prime_NB14_LJ>
4080.12384067706

> <r_psp_Prime_NB14_Lipo>
0

> <r_psp_Prime_NB14_Elec>
25541.9768680013

> <r_psp_Prime_NB14_SGB>
-15610.7236403985

> <r_psp_Prime_NBShort_LJ>
-8177.55430684242

> <r_psp_Prime_NBShort_Lipo>
-2140.20769918068

> <r_psp_Prime_NBShort_Elec>
-53005.0057356207

> <r_psp_Prime_NBShort_SGB>
17980.2462927784

> <r_psp_Prime_NBLong_LJ>
-407.519178105286

> <r_psp_Prime_NBLong_Lipo>
0

> <r_psp_Prime_NBLong_Elec>
1082.40314741005

> <r_psp_Prime_NBLong_SGB>
-1246.17248963018

> <r_psp_Prime_Self_SGB>
-34765.0837521393

> <s_m_Source_Path>
F:\Dekstop_files\DAC4,5\Molecular Systems Desgn and Engineering\supplementary_str

> <s_m_Source_File>
1000_str.mae

> <i_m_Source_File_Index>
478

> <i_lp_mmshare_version>
53156

> <s_epik_input>
W2NIXTFbY0hdW2NIXVtjSF1jKGMxMiljKFtDSDJdW05IXVtDSF0oW0NIM10pW0NIM10pYyhbbkhdMilDKD1PKVtOSF1bQ0hdM1tDSDJdW0NIMl1bQ0gyXVtDSDJdW0NIMl0z

> <s_epik_cmdline>
J2VwaWtfcHl0aG9uJywgJy1waHQnLCAnMC4wJywgJy1waCcsICc3LjAnLCAnLXRuJywgJzgnLCAnLW1hJywgJzUwMCcsICctaW1hZScsICc8aW5maWxlLm1hZT4nLCAnLW9tYWUnLCAnPG91dGZpbGUubWFlPic=

> <r_lp_tautomer_probability>
1

> <r_epik_Ionization_Penalty>
  0.0025

> <r_epik_Ionization_Penalty_Charging>
  0.0025

> <r_epik_Ionization_Penalty_Neutral>
  0.0000

> <r_epik_State_Penalty>
  0.0000

> <r_epik_Charging_Adjusted_Penalty>
0.00246385191762543

> <i_epik_Tot_Q>
1

> <i_epik_Tot_abs_Q>
1

> <s_lp_Force_Field>
S-OPLS

> <r_lp_Energy>
35.301197

> <b_lp_Chiralities_Consistent>
1

> <s_lp_Variant>
GR-20-1

> <s_i_glide_gridfile>
glide-grid_1_oct_mmpl3_after_loop_refinement

> <i_i_glide_lignum>
17

> <i_i_glide_rotatable_bonds>
6

> <r_i_docking_score>
-7.91296331479883

> <r_i_glide_ligand_efficiency>
-0.344041883252123

> <r_i_glide_ligand_efficiency_sa>
-0.978409350444062

> <r_i_glide_ligand_efficiency_ln>
-1.91342628030275

> <r_glide_XP_GScore>
-7.91296331479883

> <r_i_glide_gscore>
-7.91296331479883

> <r_i_glide_evdw>
-30.1624164581299

> <r_i_glide_ecoul>
-0.293003439903259

> <r_i_glide_energy>
-30.4554198980331

> <r_i_glide_einternal>
5.2776083946228

> <r_i_glide_emodel>
-46.9461296042429

> <r_glide_XP_HBond>
-0.0174832475361205

> <r_glide_XP_PhobEn>
-2.36458805675735

> <r_glide_XP_PhobEnHB>
0

> <r_glide_XP_LowMW>
-0.4518496

> <r_glide_XP_RotPenal>
0.402853769098065

> <r_glide_XP_LipophilicEvdW>
-5.15441391955721

> <r_glide_XP_PhobEnPairHB>
0

> <r_glide_XP_Electro>
-0.0219752579927444

> <r_glide_XP_Sitemap>
-0.305508044627076

> <r_glide_XP_Penalties>
1.04257360121286e-006

> <r_glide_XP_PiStack>
0

> <r_glide_XP_HBPenal>
0

> <r_glide_XP_ExposPenal>
0

> <r_glide_XP_PiCat>
0

> <r_glide_XP_ClBr>
0

> <r_glide_XP_Zpotr>
0

> <i_i_glide_confnum>
1

> <i_i_glide_posenum>
1

> <r_i_glide_eff_state_penalty>
0

> <i_glide_XP_PoseRank>
1

> <r_i_glide_rmsd_to_input>
108.205490828101

> <s_psp_Prime_MMGBSA_Input_Structure_Hash>
74b361d9cc1dee66fc30f974b5cc7d044873de11b10bc4fa6b2f901e

> <i_psp_number_heavy_atoms>
23

> <r_psp_MMGBSA_dG_Bind>
-40.4396709137582

> <r_psp_MMGBSA_dG_Bind_Coulomb>
75.7498715641559

> <r_psp_MMGBSA_dG_Bind_Covalent>
8.45668341226337

> <r_psp_MMGBSA_dG_Bind_Hbond>
-0.572284998672444

> <r_psp_MMGBSA_dG_Bind_Lipo>
-25.1254065915487

> <r_psp_MMGBSA_dG_Bind_Packing>
-1.98540399259104

> <r_psp_MMGBSA_dG_Bind_SelfCont>
7.105427357601e-015

> <r_psp_MMGBSA_dG_Bind_Solv_GB>
-74.0817347749389

> <r_psp_MMGBSA_dG_Bind_vdW>
-22.8813955324958

> <r_psp_Lig_Strain_Energy>
14.5855353823502

> <r_psp_Lig_Strain_Coulomb>
-0.891719000892731

> <r_psp_Lig_Strain_Covalent>
8.45688428037496

> <r_psp_Lig_Strain_Hbond>
0

> <r_psp_Lig_Strain_Lipo>
-0.384906110846926

> <r_psp_Lig_Strain_Packing>
0

> <r_psp_Lig_Strain_SelfCont>
0

> <r_psp_Lig_Strain_Solv_GB>
-0.0834686114398835

> <r_psp_Lig_Strain_vdW>
7.48874482515483

> <r_psp_Ligand_Energy>
15.589415504091

> <r_psp_Ligand_Coulomb>
4.26283665260083

> <r_psp_Ligand_Covalent>
22.2913408871388

> <r_psp_Ligand_Hbond>
0

> <r_psp_Ligand_Lipo>
-1.59906443605127

> <r_psp_Ligand_Packing>
0

> <r_psp_Ligand_SelfCont>
0

> <r_psp_Ligand_Solv_GB>
-19.9034397334963

> <r_psp_Ligand_vdW>
10.5377421338989

> <r_psp_Complex_Energy>
-34938.5970322005

> <r_psp_Complex_Coulomb>
-26380.6257202093

> <r_psp_Complex_Covalent>
4039.90336526863

> <r_psp_Complex_Hbond>
-550.669890081853

> <r_psp_Complex_Lipo>
-2140.20769918068

> <r_psp_Complex_Packing>
-57.8300464197999

> <r_psp_Complex_SelfCont>
-40.4078915603482

> <r_psp_Complex_Solv_GB>
-5303.80950574645

> <r_psp_Complex_vdW>
-4504.94964427065

> <r_psp_Receptor_Energy>
-34913.7467767908

> <r_psp_Receptor_Coulomb>
-26460.6384284261

> <r_psp_Receptor_Covalent>
4009.15534096923

> <r_psp_Receptor_Hbond>
-550.097605083181

> <r_psp_Receptor_Lipo>
-2113.48322815308

> <r_psp_Receptor_Packing>
-55.8446424272089

> <r_psp_Receptor_SelfCont>
-40.4078915603482

> <r_psp_Receptor_Solv_GB>
-5209.82433123801

> <r_psp_Receptor_vdW>
-4492.60599087205

> <r_psp_MMGBSA_dG_Bind(NS)>
-55.025206296159

> <r_psp_MMGBSA_dG_Bind(NS)_Coulomb>
76.6415905650611

> <r_psp_MMGBSA_dG_Bind(NS)_Covalent>
-0.00020086811582587

> <r_psp_MMGBSA_dG_Bind(NS)_Hbond>
-0.572284998672217

> <r_psp_MMGBSA_dG_Bind(NS)_Lipo>
-24.7405004806992

> <r_psp_MMGBSA_dG_Bind(NS)_Packing>
-1.98540399259109

> <r_psp_MMGBSA_dG_Bind(NS)_SelfCont>
0

> <r_psp_MMGBSA_dG_Bind(NS)_Solv_GB>
-73.9982661635013

> <r_psp_MMGBSA_dG_Bind(NS)_vdW>
-30.3701403576551

> <r_psp_Rec_Strain_Energy>
5.0931703299284e-011

> <r_psp_Rec_Strain_Coulomb>
-1.09139364212751e-011

> <r_psp_Rec_Strain_Covalent>
4.09272615797818e-012

> <r_psp_Rec_Strain_Hbond>
-2.27373675443232e-013

> <r_psp_Rec_Strain_Lipo>
-2.72848410531878e-012

> <r_psp_Rec_Strain_Packing>
4.9737991503207e-014

> <r_psp_Rec_Strain_SelfCont>
7.105427357601e-015

> <r_psp_Rec_Strain_Solv_GB>
2.72848410531878e-012

> <r_psp_Rec_Strain_vdW>
4.54747350886464e-012

> <r_psp_Prime_MMGBSA_ligand_efficiency>
-1.75824656146775

> <r_psp_Prime_MMGBSA_ligand_efficiency_sa>
-2.63736984220162

> <r_psp_Prime_MMGBSA_ligand_efficiency_ln>
-9.77867911360923

> <i_psp_ExecuteFunction_Internal_Entry_Index>
131

> <b_m_m_glide_XPvisualizer>
1

> <i_qp_#stars>
0

> <i_qp_#amine>
1

> <i_qp_#amidine>
0

> <i_qp_#acid>
0

> <i_qp_#amide>
0

> <i_qp_#rotor>
5

> <i_qp_#rtvFG>
0

> <i_qp_CNS>
1

> <r_qp_mol_MW>
   313.442

> <r_qp_dipole>
     6.447

> <r_qp_SASA>
   656.101

> <r_qp_FOSA>
   429.147

> <r_qp_FISA>
    51.592

> <r_qp_PISA>
   175.362

> <r_qp_WPSA>
     0.000

> <r_qp_volume>
  1137.405

> <r_qp_donorHB>
     3.000

> <r_qp_accptHB>
     4.000

> <r_qp_dip^2/V>
   0.0365427

> <r_qp_ACxDN^.5/SA>
   0.0105597

> <r_qp_glob>
   0.8031646

> <r_qp_QPpolrz>
    37.829

> <r_qp_QPlogPC16>
    11.060

> <r_qp_QPlogPoct>
    18.825

> <r_qp_QPlogPw>
    10.073

> <r_qp_QPlogPo/w>
     3.658

> <r_qp_QPlogS>
    -4.373

> <r_qp_CIQPlogS>
    -3.260

> <r_qp_QPlogHERG>
    -6.279

> <r_qp_QPPCaco>
   800.851

> <r_qp_QPlogBB>
     0.127

> <r_qp_QPPMDCK>
   430.507

> <r_qp_QPlogKp>
    -3.435

> <r_qp_IP(eV)>
     8.356

> <r_qp_EA(eV)>
     0.418

> <i_qp_#metab>
2

> <r_qp_QPlogKhsa>
     0.541

> <i_qp_HumanOralAbsorption>
3

> <r_qp_PercentHumanOralAbsorption>
   100.000

> <r_qp_SAfluorine>
     0.000

> <r_qp_SAamideO>
     0.000

> <r_qp_PSA>
    60.987

> <i_qp_#NandO>
4

> <i_qp_RuleOfFive>
0

> <i_qp_RuleOfThree>
0

> <i_qp_#ringatoms>
15

> <i_qp_#in34>
0

> <i_qp_#in56>
15

> <i_qp_#noncon>
6

> <i_qp_#nonHatm>
23

> <r_qp_Jm>
0.00487366614812874

> <s_m_subgroupid>
1000_str-imp1->adme_1000-out12

> <s_m_subgroup_title>
1000_str->adme_1000-out1

> <b_m_subgroup_collapsed>
0

$$$$
GR-21
                    3D
 Structure written by MMmdl.
 54 56  0  0  1  0            999 V2000
   -3.0006    1.8528   -0.3720 C   0  0  0  0  0  0
   -2.0135    0.8814   -0.1730 C   0  0  0  0  0  0
   -0.6734    1.2079    0.1772 C   0  0  0  0  0  0
   -0.3392    2.5645    0.3364 C   0  0  0  0  0  0
   -1.3188    3.5360    0.1404 C   0  0  0  0  0  0
   -2.6197    3.1843   -0.2077 C   0  0  0  0  0  0
    0.0668   -0.0252    0.2880 C   0  0  0  0  0  0
   -0.8443   -1.0612    0.0303 C   0  0  0  0  0  0
   -2.0692   -0.4888   -0.2465 N   0  0  0  0  0  0
    1.5410   -0.1105    0.6560 C   0  0  0  0  0  0
   -0.6211   -2.4964    0.0522 C   0  0  0  0  0  0
   -1.6687   -3.2512   -0.3402 N   0  0  0  0  0  0
   -1.6970   -4.7147   -0.3971 C   0  0  0  0  0  0
   -1.6498   -5.4265    0.9818 C   0  0  0  0  0  0
   -1.7297   -6.9631    0.8877 C   0  0  0  0  0  0
   -2.9131   -7.4364    0.0283 C   0  0  0  0  0  0
   -2.8744   -6.8011   -1.3709 C   0  0  0  0  0  0
   -2.8196   -5.2618   -1.3115 C   0  0  0  0  0  0
    0.4634   -2.9720    0.3912 O   0  0  0  0  0  0
    2.3915   -0.6963   -0.4931 N   0  3  0  0  0  0
    2.6133    0.0796   -1.8173 C   0  0  0  0  0  0
    3.7419   -0.6728   -2.5540 C   0  0  0  0  0  0
    3.0549    1.5272   -1.5073 C   0  0  0  0  0  0
    1.3236    0.0430   -2.6672 C   0  0  0  0  0  0
   -4.0150    1.5934   -0.6379 H   0  0  0  0  0  0
    0.6631    2.8604    0.6083 H   0  0  0  0  0  0
   -1.0656    4.5793    0.2615 H   0  0  0  0  0  0
   -3.3537    3.9640   -0.3510 H   0  0  0  0  0  0
   -2.8819   -1.0472   -0.4630 H   0  0  0  0  0  0
    2.0072    0.8385    0.9195 H   0  0  0  0  0  0
    1.7232   -0.8064    1.4753 H   0  0  0  0  0  0
   -2.5487   -2.7915   -0.5207 H   0  0  0  0  0  0
   -0.7754   -5.0134   -0.9034 H   0  0  0  0  0  0
   -0.7439   -5.1527    1.5239 H   0  0  0  0  0  0
   -2.4924   -5.0822    1.5837 H   0  0  0  0  0  0
   -0.8001   -7.3464    0.4639 H   0  0  0  0  0  0
   -1.8042   -7.3910    1.8882 H   0  0  0  0  0  0
   -2.8999   -8.5237   -0.0565 H   0  0  0  0  0  0
   -3.8514   -7.1800    0.5227 H   0  0  0  0  0  0
   -2.0032   -7.1727   -1.9128 H   0  0  0  0  0  0
   -3.7451   -7.1186   -1.9460 H   0  0  0  0  0  0
   -3.7823   -4.9082   -0.9380 H   0  0  0  0  0  0
   -2.7093   -4.8669   -2.3227 H   0  0  0  0  0  0
    3.9742   -0.1987   -3.5087 H   0  0  0  0  0  0
    3.4692   -1.7076   -2.7695 H   0  0  0  0  0  0
    4.6665   -0.6915   -1.9744 H   0  0  0  0  0  0
    3.9289    1.5568   -0.8548 H   0  0  0  0  0  0
    2.2637    2.1035   -1.0287 H   0  0  0  0  0  0
    3.3177    2.0595   -2.4223 H   0  0  0  0  0  0
    1.5078    0.4332   -3.6690 H   0  0  0  0  0  0
    0.5280    0.6553   -2.2470 H   0  0  0  0  0  0
    0.9387   -0.9716   -2.7831 H   0  0  0  0  0  0
    3.3103   -0.8525   -0.1041 H   0  0  0  0  0  0
    2.0186   -1.6077   -0.7200 H   0  0  0  0  0  0
  1  2  1  0  0  0
  1  6  2  0  0  0
  1 25  1  0  0  0
  2  3  2  0  0  0
  2  9  1  0  0  0
  3  4  1  0  0  0
  3  7  1  0  0  0
  4  5  2  0  0  0
  4 26  1  0  0  0
  5  6  1  0  0  0
  5 27  1  0  0  0
  6 28  1  0  0  0
  7  8  2  0  0  0
  7 10  1  0  0  0
  8  9  1  0  0  0
  8 11  1  0  0  0
  9 29  1  0  0  0
 10 20  1  0  0  0
 10 30  1  0  0  0
 10 31  1  0  0  0
 11 12  1  0  0  0
 11 19  2  0  0  0
 12 13  1  0  0  0
 12 32  1  0  0  0
 13 18  1  0  0  0
 13 14  1  0  0  0
 13 33  1  0  0  0
 14 15  1  0  0  0
 14 34  1  0  0  0
 14 35  1  0  0  0
 15 16  1  0  0  0
 15 36  1  0  0  0
 15 37  1  0  0  0
 16 17  1  0  0  0
 16 38  1  0  0  0
 16 39  1  0  0  0
 17 18  1  0  0  0
 17 40  1  0  0  0
 17 41  1  0  0  0
 18 42  1  0  0  0
 18 43  1  0  0  0
 20 21  1  0  0  0
 20 53  1  0  0  0
 20 54  1  0  0  0
 21 22  1  0  0  0
 21 23  1  0  0  0
 21 24  1  0  0  0
 22 44  1  0  0  0
 22 45  1  0  0  0
 22 46  1  0  0  0
 23 47  1  0  0  0
 23 48  1  0  0  0
 23 49  1  0  0  0
 24 50  1  0  0  0
 24 51  1  0  0  0
 24 52  1  0  0  0
M  CHG  1  20   1
M  END
> <s_m_entry_id>
7623

> <s_m_entry_name>
entry

> <i_f3d_flags>
0

> <s_m_job_name>
adme_1000

> <r_psp_Prime_Energy>
-34965.1920766675

> <r_psp_Prime_Solv_GB>
-5300.2703073434

> <r_psp_Prime_Coulomb>
-26388.1866339969

> <r_psp_Prime_vdW>
-4525.04268323973

> <r_psp_Prime_Covalent>
4035.97078085173

> <i_psp_model_num>
0

> <r_psp_Prime_Lipo>
-2141.30413182526

> <s_psp_Prime_Energy_Force_Field>
OPLS3e

> <s_psp_Prime_Energy_Solvent_Model>
VSGB2.1

> <r_psp_Prime_Hbond>
-550.106567126347

> <r_psp_Prime_Packing>
-55.8446424272089

> <r_psp_Prime_SelfCont>
-40.4078915603482

> <r_psp_Memb1_x>
103.457542316003

> <r_psp_Memb1_y>
39.4731108300965

> <r_psp_Memb1_z>
48.7987221124676

> <r_psp_Memb2_x>
99.8134167309003

> <r_psp_Memb2_y>
2.81176945184187

> <r_psp_Memb2_z>
23.8404289603493

> <r_psp_MembDummyRadius>
4.45

> <r_psp_Prime_Bond_Covalent>
467.329121215336

> <r_psp_Prime_Bond_SGB>
49984.3687281249

> <r_psp_Prime_Angle_Covalent>
2225.37934640858

> <r_psp_Prime_Angle_SGB>
-21649.2962977924

> <r_psp_Prime_Torsion_Covalent>
1343.26231322781

> <r_psp_Prime_NB14_LJ>
4079.11420699709

> <r_psp_Prime_NB14_Lipo>
0

> <r_psp_Prime_NB14_Elec>
25512.5052825113

> <r_psp_Prime_NB14_SGB>
-15597.6555887038

> <r_psp_Prime_NBShort_LJ>
-8196.73375754152

> <r_psp_Prime_NBShort_Lipo>
-2141.30413182526

> <r_psp_Prime_NBShort_Elec>
-52981.1826227193

> <r_psp_Prime_NBShort_SGB>
17967.1924785189

> <r_psp_Prime_NBLong_LJ>
-407.423132695307

> <r_psp_Prime_NBLong_Lipo>
0

> <r_psp_Prime_NBLong_Elec>
1080.49070621109

> <r_psp_Prime_NBLong_SGB>
-1237.93803603317

> <r_psp_Prime_Self_SGB>
-34766.9415914578

> <s_m_Source_Path>
F:\Dekstop_files\DAC4,5\Molecular Systems Desgn and Engineering\supplementary_str

> <s_m_Source_File>
1000_str.mae

> <i_m_Source_File_Index>
547

> <i_lp_mmshare_version>
53156

> <s_epik_input>
W2NIXTFbY0hdW2NIXVtjSF1jKGMxMiljKFtDSDJdW05IXUMoW0NIM10pKFtDSDNdKVtDSDNdKWMoW25IXTIpQyg9TylbTkhdW0NIXTNbQ0gyXVtDSDJdW0NIMl1bQ0gyXVtDSDJdMw==

> <s_epik_cmdline>
J2VwaWtfcHl0aG9uJywgJy1waHQnLCAnMC4wJywgJy1waCcsICc3LjAnLCAnLXRuJywgJzgnLCAnLW1hJywgJzUwMCcsICctaW1hZScsICc8aW5maWxlLm1hZT4nLCAnLW9tYWUnLCAnPG91dGZpbGUubWFlPic=

> <r_lp_tautomer_probability>
1

> <r_epik_Ionization_Penalty>
  0.0025

> <r_epik_Ionization_Penalty_Charging>
  0.0025

> <r_epik_Ionization_Penalty_Neutral>
  0.0000

> <r_epik_State_Penalty>
  0.0000

> <r_epik_Charging_Adjusted_Penalty>
0.00246385191762543

> <i_epik_Tot_Q>
1

> <i_epik_Tot_abs_Q>
1

> <s_lp_Force_Field>
S-OPLS

> <r_lp_Energy>
35.287982

> <b_lp_Chiralities_Consistent>
1

> <s_lp_Variant>
GR-21-1

> <s_i_glide_gridfile>
glide-grid_1_oct_mmpl3_after_loop_refinement

> <i_i_glide_lignum>
18

> <i_i_glide_rotatable_bonds>
6

> <r_i_docking_score>
-6.28335995054992

> <r_i_glide_ligand_efficiency>
-0.261806664606247

> <r_i_glide_ligand_efficiency_sa>
-0.755181098263948

> <r_i_glide_ligand_efficiency_ln>
-1.50389636076724

> <r_glide_XP_GScore>
-6.28335995054992

> <r_i_glide_gscore>
-6.28335995054992

> <r_i_glide_evdw>
-37.5812644958496

> <r_i_glide_ecoul>
-1.50015068054199

> <r_i_glide_energy>
-39.0814151763916

> <r_i_glide_einternal>
7.58271074295044

> <r_i_glide_emodel>
-51.8317229743548

> <r_glide_XP_HBond>
0

> <r_glide_XP_PhobEn>
-2.2260013706116

> <r_glide_XP_PhobEnHB>
0

> <r_glide_XP_LowMW>
-0.405094333333332

> <r_glide_XP_RotPenal>
0.373026100128801

> <r_glide_XP_LipophilicEvdW>
-6.63195721892219

> <r_glide_XP_PhobEnPairHB>
0

> <r_glide_XP_Electro>
-0.112511301040649

> <r_glide_XP_Sitemap>
-0.281619469846638

> <r_glide_XP_Penalties>
3.00079764307568

> <r_glide_XP_PiStack>
0

> <r_glide_XP_HBPenal>
0

> <r_glide_XP_ExposPenal>
0

> <r_glide_XP_PiCat>
0

> <r_glide_XP_ClBr>
0

> <r_glide_XP_Zpotr>
0

> <i_i_glide_confnum>
1

> <i_i_glide_posenum>
146

> <r_i_glide_eff_state_penalty>
0

> <i_glide_XP_PoseRank>
1

> <r_i_glide_rmsd_to_input>
109.717536478219

> <s_psp_Prime_MMGBSA_Input_Structure_Hash>
c8e6e69b83fa95a57cc0ae38409219eeecefc6a80acc6cfa9c6c20fe

> <i_psp_number_heavy_atoms>
24

> <r_psp_MMGBSA_dG_Bind>
-59.6579771066099

> <r_psp_MMGBSA_dG_Bind_Coulomb>
79.5092033623223

> <r_psp_MMGBSA_dG_Bind_Covalent>
3.24389940928677

> <r_psp_MMGBSA_dG_Bind_Hbond>
-0.00896204316654803

> <r_psp_MMGBSA_dG_Bind_Lipo>
-26.4553981697572

> <r_psp_MMGBSA_dG_Bind_Packing>
4.9737991503207e-014

> <r_psp_MMGBSA_dG_Bind_SelfCont>
7.105427357601e-015

> <r_psp_MMGBSA_dG_Bind_Solv_GB>
-72.2977036327929

> <r_psp_MMGBSA_dG_Bind_vdW>
-43.6490160325602

> <r_psp_Lig_Strain_Energy>
7.54607482531249

> <r_psp_Lig_Strain_Coulomb>
4.20905573438129

> <r_psp_Lig_Strain_Covalent>
3.24410027739876

> <r_psp_Lig_Strain_Hbond>
0

> <r_psp_Lig_Strain_Lipo>
-0.0440591146220322

> <r_psp_Lig_Strain_Packing>
0

> <r_psp_Lig_Strain_SelfCont>
0

> <r_psp_Lig_Strain_Solv_GB>
-2.62653949257925

> <r_psp_Lig_Strain_vdW>
2.7635174207337

> <r_psp_Ligand_Energy>
8.21267722990471

> <r_psp_Ligand_Coulomb>
-7.05740893316753

> <r_psp_Ligand_Covalent>
23.5715404732135

> <r_psp_Ligand_Hbond>
0

> <r_psp_Ligand_Lipo>
-1.36550550242237

> <r_psp_Ligand_Packing>
0

> <r_psp_Ligand_SelfCont>
0

> <r_psp_Ligand_Solv_GB>
-18.1482724725996

> <r_psp_Ligand_vdW>
11.2123236648807

> <r_psp_Complex_Energy>
-34965.1920766675

> <r_psp_Complex_Coulomb>
-26388.1866339969

> <r_psp_Complex_Covalent>
4035.97078085173

> <r_psp_Complex_Hbond>
-550.106567126347

> <r_psp_Complex_Lipo>
-2141.30413182526

> <r_psp_Complex_Packing>
-55.8446424272089

> <r_psp_Complex_SelfCont>
-40.4078915603482

> <r_psp_Complex_Solv_GB>
-5300.2703073434

> <r_psp_Complex_vdW>
-4525.04268323973

> <r_psp_Receptor_Energy>
-34913.7467767908

> <r_psp_Receptor_Coulomb>
-26460.6384284261

> <r_psp_Receptor_Covalent>
4009.15534096923

> <r_psp_Receptor_Hbond>
-550.097605083181

> <r_psp_Receptor_Lipo>
-2113.48322815308

> <r_psp_Receptor_Packing>
-55.8446424272089

> <r_psp_Receptor_SelfCont>
-40.4078915603482

> <r_psp_Receptor_Solv_GB>
-5209.82433123801

> <r_psp_Receptor_vdW>
-4492.60599087205

> <r_psp_MMGBSA_dG_Bind(NS)>
-67.204051931978

> <r_psp_MMGBSA_dG_Bind(NS)_Coulomb>
75.3001476279533

> <r_psp_MMGBSA_dG_Bind(NS)_Covalent>
-0.00020086811582587

> <r_psp_MMGBSA_dG_Bind(NS)_Hbond>
-0.00896204316632065

> <r_psp_MMGBSA_dG_Bind(NS)_Lipo>
-26.4113390551324

> <r_psp_MMGBSA_dG_Bind(NS)_Packing>
0

> <r_psp_MMGBSA_dG_Bind(NS)_SelfCont>
0

> <r_psp_MMGBSA_dG_Bind(NS)_Solv_GB>
-69.6711641402162

> <r_psp_MMGBSA_dG_Bind(NS)_vdW>
-46.4125334532991

> <r_psp_Rec_Strain_Energy>
5.0931703299284e-011

> <r_psp_Rec_Strain_Coulomb>
-1.09139364212751e-011

> <r_psp_Rec_Strain_Covalent>
4.09272615797818e-012

> <r_psp_Rec_Strain_Hbond>
-2.27373675443232e-013

> <r_psp_Rec_Strain_Lipo>
-2.72848410531878e-012

> <r_psp_Rec_Strain_Packing>
4.9737991503207e-014

> <r_psp_Rec_Strain_SelfCont>
7.105427357601e-015

> <r_psp_Rec_Strain_Solv_GB>
2.72848410531878e-012

> <r_psp_Rec_Strain_vdW>
4.54747350886464e-012

> <r_psp_Prime_MMGBSA_ligand_efficiency>
-2.48574904610875

> <r_psp_Prime_MMGBSA_ligand_efficiency_sa>
-3.72862356916312

> <r_psp_Prime_MMGBSA_ligand_efficiency_ln>
-14.2788914478016

> <i_psp_ExecuteFunction_Internal_Entry_Index>
178

> <b_m_m_glide_XPvisualizer>
1

> <i_qp_#stars>
0

> <i_qp_#amine>
1

> <i_qp_#amidine>
0

> <i_qp_#acid>
0

> <i_qp_#amide>
0

> <i_qp_#rotor>
5

> <i_qp_#rtvFG>
0

> <i_qp_CNS>
1

> <r_qp_mol_MW>
   327.469

> <r_qp_dipole>
     7.111

> <r_qp_SASA>
   628.846

> <r_qp_FOSA>
   425.017

> <r_qp_FISA>
    48.933

> <r_qp_PISA>
   154.896

> <r_qp_WPSA>
     0.000

> <r_qp_volume>
  1135.792

> <r_qp_donorHB>
     3.000

> <r_qp_accptHB>
     3.500

> <r_qp_dip^2/V>
   0.0445199

> <r_qp_ACxDN^.5/SA>
   0.0096402

> <r_qp_glob>
   0.8371824

> <r_qp_QPpolrz>
    37.569

> <r_qp_QPlogPC16>
    10.887

> <r_qp_QPlogPoct>
    18.659

> <r_qp_QPlogPw>
     9.357

> <r_qp_QPlogPo/w>
     3.844

> <r_qp_QPlogS>
    -4.027

> <r_qp_CIQPlogS>
    -3.702

> <r_qp_QPlogHERG>
    -5.631

> <r_qp_QPPCaco>
   848.734

> <r_qp_QPlogBB>
     0.195

> <r_qp_QPPMDCK>
   458.396

> <r_qp_QPlogKp>
    -3.458

> <r_qp_IP(eV)>
     8.449

> <r_qp_EA(eV)>
     0.538

> <i_qp_#metab>
2

> <r_qp_QPlogKhsa>
     0.630

> <i_qp_HumanOralAbsorption>
3

> <r_qp_PercentHumanOralAbsorption>
   100.000

> <r_qp_SAfluorine>
     0.000

> <r_qp_SAamideO>
     0.000

> <r_qp_PSA>
    59.173

> <i_qp_#NandO>
4

> <i_qp_RuleOfFive>
0

> <i_qp_RuleOfThree>
0

> <i_qp_#ringatoms>
15

> <i_qp_#in34>
0

> <i_qp_#in56>
15

> <i_qp_#noncon>
6

> <i_qp_#nonHatm>
24

> <r_qp_Jm>
0.0107246771173437

> <s_m_subgroupid>
1000_str-imp1->adme_1000-out12

> <s_m_subgroup_title>
1000_str->adme_1000-out1

> <b_m_subgroup_collapsed>
0

$$$$
ind_1,25270
                    3D
 Structure written by MMmdl.
 47 50  0  0  1  0            999 V2000
   -3.2965    1.7268   -0.2815 C   0  0  0  0  0  0
   -2.2407    0.8143   -0.1779 C   0  0  0  0  0  0
   -0.8764    1.2198   -0.1482 C   0  0  0  0  0  0
   -0.5869    2.5934   -0.2365 C   0  0  0  0  0  0
   -1.6353    3.5054   -0.3424 C   0  0  0  0  0  0
   -2.9597    3.0778   -0.3635 C   0  0  0  0  0  0
   -0.0745    0.0279   -0.0294 C   0  0  0  0  0  0
   -0.9567   -1.0612   -0.0189 C   0  0  0  0  0  0
   -2.2401   -0.5575   -0.0850 N   0  0  0  0  0  0
   -0.6714   -2.4734    0.1438 C   0  0  0  0  0  0
   -1.6446   -3.3018   -0.2873 N   0  0  0  0  0  0
    0.3934   -2.8653    0.6233 O   0  0  0  0  0  0
   -1.6101   -4.7650   -0.2391 C   0  0  0  0  0  0
   -1.6669   -5.3789    1.1855 C   0  0  0  0  0  0
   -1.6794   -6.9205    1.1946 C   0  0  0  0  0  0
   -2.7568   -7.5022    0.2654 C   0  0  0  0  0  0
   -2.6060   -6.9649   -1.1668 C   0  0  0  0  0  0
   -2.6143   -5.4243   -1.2156 C   0  0  0  0  0  0
   -4.3286    1.4089   -0.3003 H   0  0  0  0  0  0
    0.4344    2.9439   -0.2241 H   0  0  0  0  0  0
   -1.4169    4.5612   -0.4097 H   0  0  0  0  0  0
   -3.7473    3.8124   -0.4472 H   0  0  0  0  0  0
   -3.0497   -1.1600   -0.0624 H   0  0  0  0  0  0
   -2.5109   -2.8938   -0.6055 H   0  0  0  0  0  0
   -0.6314   -5.0545   -0.6307 H   0  0  0  0  0  0
   -0.8270   -5.0292    1.7868 H   0  0  0  0  0  0
   -2.5752   -5.0329    1.6812 H   0  0  0  0  0  0
   -0.7000   -7.2899    0.8866 H   0  0  0  0  0  0
   -1.8321   -7.2831    2.2118 H   0  0  0  0  0  0
   -2.6964   -8.5912    0.2621 H   0  0  0  0  0  0
   -3.7471   -7.2521    0.6492 H   0  0  0  0  0  0
   -1.6729   -7.3345   -1.5950 H   0  0  0  0  0  0
   -3.4046   -7.3592   -1.7966 H   0  0  0  0  0  0
   -3.6219   -5.0887   -0.9647 H   0  0  0  0  0  0
   -2.4176   -5.0960   -2.2374 H   0  0  0  0  0  0
    1.8846    1.6704    2.0633 C   0  0  0  0  0  0
    2.1979    0.7158    0.9330 C   0  0  0  0  0  0
    1.3847    0.0053    0.0445 C   0  0  0  0  0  0
    2.2357   -0.7408   -0.7870 C   0  0  0  0  0  0
    3.5415   -0.4848   -0.4130 C   0  0  0  0  0  0
    3.4995    0.4005    0.6289 N   0  0  0  0  0  0
    4.3088    0.7663    1.1099 H   0  0  0  0  0  0
    0.8188    1.7035    2.2888 H   0  0  0  0  0  0
    2.1961    2.6879    1.8270 H   0  0  0  0  0  0
    2.3921    1.3841    2.9848 H   0  0  0  0  0  0
    1.9233   -1.4013   -1.5827 H   0  0  0  0  0  0
    4.4858   -0.8497   -0.7890 H   0  0  0  0  0  0
  1  2  2  0  0  0
  1  6  1  0  0  0
  1 19  1  0  0  0
  2  3  1  0  0  0
  2  9  1  0  0  0
  3  4  2  0  0  0
  3  7  1  0  0  0
  4  5  1  0  0  0
  4 20  1  0  0  0
  5  6  2  0  0  0
  5 21  1  0  0  0
  6 22  1  0  0  0
  7  8  2  0  0  0
  7 38  1  0  0  0
  8  9  1  0  0  0
  8 10  1  0  0  0
  9 23  1  0  0  0
 10 11  1  0  0  0
 10 12  2  0  0  0
 11 13  1  0  0  0
 11 24  1  0  0  0
 13 18  1  0  0  0
 13 14  1  0  0  0
 13 25  1  0  0  0
 14 15  1  0  0  0
 14 26  1  0  0  0
 14 27  1  0  0  0
 15 16  1  0  0  0
 15 28  1  0  0  0
 15 29  1  0  0  0
 16 17  1  0  0  0
 16 30  1  0  0  0
 16 31  1  0  0  0
 17 18  1  0  0  0
 17 32  1  0  0  0
 17 33  1  0  0  0
 18 34  1  0  0  0
 18 35  1  0  0  0
 36 37  1  0  0  0
 36 43  1  0  0  0
 36 44  1  0  0  0
 36 45  1  0  0  0
 37 41  1  0  0  0
 37 38  2  0  0  0
 38 39  1  0  0  0
 39 40  2  0  0  0
 39 46  1  0  0  0
 40 41  1  0  0  0
 40 47  1  0  0  0
 41 42  1  0  0  0
M  END
> <s_m_entry_id>
7848

> <s_m_entry_name>
entry

> <i_f3d_flags>
0

> <s_m_job_name>
adme_1000

> <r_psp_Prime_Energy>
-34112.0050466236

> <r_psp_Prime_Solv_GB>
-5184.33077984254

> <r_psp_Prime_Coulomb>
-26463.7475073776

> <r_psp_Prime_vdW>
-4062.04494784928

> <r_psp_Prime_Covalent>
4420.18485300808

> <i_psp_model_num>
0

> <r_psp_Prime_Lipo>
-2175.7165254915

> <s_psp_Prime_Energy_Force_Field>
S-OPLS

> <s_psp_Prime_Energy_Solvent_Model>
VSGB2.1

> <r_psp_Prime_Hbond>
-550.097605083181

> <r_psp_Prime_Packing>
-55.8446424272089

> <r_psp_Prime_SelfCont>
-40.4078915603482

> <r_psp_Memb1_x>
103.457542316003

> <r_psp_Memb1_y>
39.4731108300965

> <r_psp_Memb1_z>
48.7987221124676

> <r_psp_Memb2_x>
99.8134167309003

> <r_psp_Memb2_y>
2.81176945184187

> <r_psp_Memb2_z>
23.8404289603493

> <r_psp_MembDummyRadius>
4.45

> <r_psp_Prime_Bond_Covalent>
468.083410693365

> <r_psp_Prime_Bond_SGB>
49971.4852916247

> <r_psp_Prime_Angle_Covalent>
2224.84630069369

> <r_psp_Prime_Angle_SGB>
-21650.3119318693

> <r_psp_Prime_Torsion_Covalent>
1727.25514162103

> <r_psp_Prime_NB14_LJ>
4236.22927288875

> <r_psp_Prime_NB14_Lipo>
0

> <r_psp_Prime_NB14_Elec>
25575.1253728638

> <r_psp_Prime_NB14_SGB>
-15628.4589156566

> <r_psp_Prime_NBShort_LJ>
-7883.3367674909

> <r_psp_Prime_NBShort_Lipo>
-2175.7165254915

> <r_psp_Prime_NBShort_Elec>
-53056.9487659243

> <r_psp_Prime_NBShort_SGB>
18026.3344826579

> <r_psp_Prime_NBLong_LJ>
-414.937453247129

> <r_psp_Prime_NBLong_Lipo>
0

> <r_psp_Prime_NBLong_Elec>
1018.07588568288

> <r_psp_Prime_NBLong_SGB>
-1159.78490855113

> <r_psp_Prime_Self_SGB>
-34743.5947980481

> <s_m_Source_Path>
F:\Dekstop_files\DAC4,5\Molecular Systems Desgn and Engineering\supplementary_str

> <s_m_Source_File>
1000_str.mae

> <i_m_Source_File_Index>
772

> <i_lp_mmshare_version>
53156

> <s_epik_input>
W2NIXTFbY0hdW2NIXVtjSF1jKGMxMiljKC1jKGMzW0NIM10pW2NIXVtjSF1bbkhdMyljKFtuSF0yKUMoPU8pW05IXVtDSF00W0NIMl1bQ0gyXVtDSDJdW0NIMl1bQ0gyXTQ=

> <s_epik_cmdline>
J2VwaWtfcHl0aG9uJywgJy1waHQnLCAnMC4wJywgJy1waCcsICc3LjAnLCAnLXRuJywgJzgnLCAnLW1hJywgJzUwMCcsICctaW1hZScsICc8aW5maWxlLm1hZT4nLCAnLW9tYWUnLCAnPG91dGZpbGUubWFlPic=

> <r_lp_tautomer_probability>
1

> <r_epik_Ionization_Penalty>
  0.0000

> <r_epik_Ionization_Penalty_Charging>
  0.0000

> <r_epik_Ionization_Penalty_Neutral>
  0.0000

> <r_epik_State_Penalty>
  0.0000

> <r_epik_Charging_Adjusted_Penalty>
0

> <i_epik_Tot_Q>
0

> <i_epik_Tot_abs_Q>
0

> <s_lp_Force_Field>
S-OPLS

> <r_lp_Energy>
34.604603

> <b_lp_Chiralities_Consistent>
1

> <s_lp_Variant>
ind_1,25270-1

> <s_i_glide_gridfile>
glide-grid_mmpl3

> <i_i_glide_lignum>
1544

> <i_i_glide_rotatable_bonds>
4

> <r_i_docking_score>
-7.68083226683548

> <r_i_glide_ligand_efficiency>
-0.320034677784812

> <r_i_glide_ligand_efficiency_sa>
-0.923139752059299

> <r_i_glide_ligand_efficiency_ln>
-1.83837561188048

> <r_i_glide_gscore>
-7.68083226683548

> <r_i_glide_evdw>
-40.5394630432129

> <r_i_glide_ecoul>
0.0696515217423439

> <r_i_glide_energy>
-40.4698115214705

> <r_i_glide_einternal>
1.10092520713806

> <r_i_glide_emodel>
-58.2232355685018

> <i_i_glide_confnum>
37

> <i_i_glide_posenum>
55

> <r_i_glide_eff_state_penalty>
0

> <i_rge_num_r_groups>
1

> <r_rge_occupation_R1>
1

> <s_rge_R1>
25270

> <s_rge_R1_s_m_title>
25270

> <s_rge_R1_s_m_entry_id>
17267

> <s_rge_R1_s_m_entry_name>
eMol_BB_r-groups.657

> <s_rge_R1_s_m_smiles>
[*]c1c(C)[nH]cc1

> <b_rge_R1_b_sd_chiral_flag>
0

> <i_rge_R1_i_sd_version>
0

> <s_rge_R1_s_m_Source_File>
eMol_BB_r-groups-dedup.mae

> <i_rge_R1_i_m_Source_File_Index>
529

> <s_rge_R1_s_m_Source_Path>
/Users/konze/projects/pathfinder/r-groups

> <s_rge_R1_s_sd_Source_Path>
/Users/konze/projects/pathfinder/reactant sets/eMolecules

> <s_rge_R1_s_sd_Source_File>
eMol BB r-groups.mae

> <i_rge_R1_i_sd_Source_File_Index>
657

> <r_rge_R1_r_sd_MW>
81.1158

> <i_rge_R1_i_sd_RB>
0

> <i_rge_R1_i_sd_HeavyAtomCount>
6

> <i_rge_R1_i_sd_HBA>
0

> <i_rge_R1_i_sd_HBD>
1

> <r_rge_R1_r_sd_PSA>
15.79

> <i_rge_R1_i_sd_ChiralCenterCount>
0

> <i_rge_R1_i_sd_ChiralCenterCountAllPossible>
0

> <i_rge_R1_i_sd_RingCount>
1

> <r_rge_R1_r_sd_AlogP>
0.5534

> <s_rge_R1_s_sd_subgroup_title>
eMol BB r-groups

> <s_rge_R1_s_sd_subgroupid>
eMol BB r-groups

> <i_rge_R1_i_sd_subgroup_collapsed>
0

> <s_rge_R1_s_sd_Unique_SMILES_Stereo>
Cc1ccc[nH]1

> <i_rge_R1_i_sd_canvasUID>
598

> <s_rge_R1_s_canvas_Unique_SMILES_Stereo>
Cc1ccc[nH]1

> <s_psp_Prime_MMGBSA_Input_Structure_Hash>
e1149ea03f0285e68bf068cbc6f1d11502370f540adce6ad9765038b

> <i_psp_number_heavy_atoms>
24

> <r_psp_MMGBSA_dG_Bind>
-32.5696182873944

> <r_psp_MMGBSA_dG_Bind_Coulomb>
2.42812542041065

> <r_psp_MMGBSA_dG_Bind_Covalent>
3.00782307592181

> <r_psp_MMGBSA_dG_Bind_Hbond>
-2.27373675443232e-013

> <r_psp_MMGBSA_dG_Bind_Lipo>
-23.4692575384411

> <r_psp_MMGBSA_dG_Bind_Packing>
4.9737991503207e-014

> <r_psp_MMGBSA_dG_Bind_SelfCont>
7.105427357601e-015

> <r_psp_MMGBSA_dG_Bind_Solv_GB>
33.8264471692446

> <r_psp_MMGBSA_dG_Bind_vdW>
-48.3627564144281

> <r_psp_Lig_Strain_Energy>
3.97797598444974

> <r_psp_Lig_Strain_Coulomb>
-1.30945334796634

> <r_psp_Lig_Strain_Covalent>
3.0080239440341

> <r_psp_Lig_Strain_Hbond>
0

> <r_psp_Lig_Strain_Lipo>
-0.00122646207542521

> <r_psp_Lig_Strain_Packing>
0

> <r_psp_Lig_Strain_SelfCont>
0

> <r_psp_Lig_Strain_Solv_GB>
0.378885587091858

> <r_psp_Lig_Strain_vdW>
1.90174626336555

> <r_psp_Ligand_Energy>
15.8156123975635

> <r_psp_Ligand_Coulomb>
-7.25981885505061

> <r_psp_Ligand_Covalent>
26.7705041107525

> <r_psp_Ligand_Hbond>
0

> <r_psp_Ligand_Lipo>
-1.7226356155762

> <r_psp_Ligand_Packing>
0

> <r_psp_Ligand_SelfCont>
0

> <r_psp_Ligand_Solv_GB>
-11.6054466491993

> <r_psp_Ligand_vdW>
9.63300940663713

> <r_psp_Complex_Energy>
-34112.0050466236

> <r_psp_Complex_Coulomb>
-26463.7475073776

> <r_psp_Complex_Covalent>
4420.18485300808

> <r_psp_Complex_Hbond>
-550.097605083181

> <r_psp_Complex_Lipo>
-2175.7165254915

> <r_psp_Complex_Packing>
-55.8446424272089

> <r_psp_Complex_SelfCont>
-40.4078915603482

> <r_psp_Complex_Solv_GB>
-5184.33077984254

> <r_psp_Complex_vdW>
-4062.04494784928

> <r_psp_Receptor_Energy>
-34095.2510407338

> <r_psp_Receptor_Coulomb>
-26458.915813943

> <r_psp_Receptor_Covalent>
4390.40652582141

> <r_psp_Receptor_Hbond>
-550.097605083181

> <r_psp_Receptor_Lipo>
-2150.52463233748

> <r_psp_Receptor_Packing>
-55.8446424272089

> <r_psp_Receptor_SelfCont>
-40.4078915603482

> <r_psp_Receptor_Solv_GB>
-5206.55178036259

> <r_psp_Receptor_vdW>
-4023.31520084149

> <r_psp_MMGBSA_dG_Bind(NS)>
-36.5475942717894

> <r_psp_MMGBSA_dG_Bind(NS)_Coulomb>
3.7375787683377

> <r_psp_MMGBSA_dG_Bind(NS)_Covalent>
-0.000200868111278396

> <r_psp_MMGBSA_dG_Bind(NS)_Hbond>
0

> <r_psp_MMGBSA_dG_Bind(NS)_Lipo>
-23.4680310763606

> <r_psp_MMGBSA_dG_Bind(NS)_Packing>
0

> <r_psp_MMGBSA_dG_Bind(NS)_SelfCont>
0

> <r_psp_MMGBSA_dG_Bind(NS)_Solv_GB>
33.4475615821539

> <r_psp_MMGBSA_dG_Bind(NS)_vdW>
-50.2645026777982

> <r_psp_Rec_Strain_Energy>
-5.0931703299284e-011

> <r_psp_Rec_Strain_Coulomb>
4.00177668780088e-011

> <r_psp_Rec_Strain_Covalent>
-9.09494701772928e-013

> <r_psp_Rec_Strain_Hbond>
-2.27373675443232e-013

> <r_psp_Rec_Strain_Lipo>
-5.00222085975111e-012

> <r_psp_Rec_Strain_Packing>
4.9737991503207e-014

> <r_psp_Rec_Strain_SelfCont>
7.105427357601e-015

> <r_psp_Rec_Strain_Solv_GB>
-1.81898940354586e-012

> <r_psp_Rec_Strain_vdW>
4.54747350886464e-012

> <r_psp_Prime_MMGBSA_ligand_efficiency>
-1.35706742864143

> <r_psp_Prime_MMGBSA_ligand_efficiency_sa>
-2.03560114296215

> <r_psp_Prime_MMGBSA_ligand_efficiency_ln>
-7.79540417857231

> <r_i_glide_lipo>
-4.10385676048499

> <r_i_glide_hbond>
0

> <r_i_glide_metal>
0

> <r_i_glide_rewards>
-2.28396464583441

> <r_i_glide_erotb>
0.723514563383224

> <r_i_glide_esite>
0

> <i_psp_ExecuteFunction_Internal_Entry_Index>
2148

> <i_qp_#stars>
0

> <i_qp_#amine>
0

> <i_qp_#amidine>
0

> <i_qp_#acid>
0

> <i_qp_#amide>
0

> <i_qp_#rotor>
2

> <i_qp_#rtvFG>
0

> <i_qp_CNS>
-1

> <r_qp_mol_MW>
   321.421

> <r_qp_dipole>
     3.020

> <r_qp_SASA>
   633.707

> <r_qp_FOSA>
   313.351

> <r_qp_FISA>
    72.158

> <r_qp_PISA>
   248.198

> <r_qp_WPSA>
     0.000

> <r_qp_volume>
  1095.155

> <r_qp_donorHB>
     3.000

> <r_qp_accptHB>
     2.500

> <r_qp_dip^2/V>
   0.0083306

> <r_qp_ACxDN^.5/SA>
   0.0068330

> <r_qp_glob>
   0.8108250

> <r_qp_QPpolrz>
    38.760

> <r_qp_QPlogPC16>
    11.303

> <r_qp_QPlogPoct>
    18.295

> <r_qp_QPlogPw>
     9.839

> <r_qp_QPlogPo/w>
     4.417

> <r_qp_QPlogS>
    -6.070

> <r_qp_CIQPlogS>
    -5.261

> <r_qp_QPlogHERG>
    -5.777

> <r_qp_QPPCaco>
  2049.405

> <r_qp_QPlogBB>
    -0.289

> <r_qp_QPPMDCK>
  1074.442

> <r_qp_QPlogKp>
    -1.783

> <r_qp_IP(eV)>
     7.945

> <r_qp_EA(eV)>
     0.240

> <i_qp_#metab>
2

> <r_qp_QPlogKhsa>
     0.785

> <i_qp_HumanOralAbsorption>
3

> <r_qp_PercentHumanOralAbsorption>
   100.000

> <r_qp_SAfluorine>
     0.000

> <r_qp_SAamideO>
     0.000

> <r_qp_PSA>
    61.298

> <i_qp_#NandO>
4

> <i_qp_RuleOfFive>
0

> <i_qp_RuleOfThree>
1

> <i_qp_#ringatoms>
20

> <i_qp_#in34>
0

> <i_qp_#in56>
20

> <i_qp_#noncon>
6

> <i_qp_#nonHatm>
24

> <r_qp_Jm>
0.00451320610727335

> <s_m_subgroupid>
1000_str-imp1->adme_1000-out12

> <s_m_subgroup_title>
1000_str->adme_1000-out1

> <b_m_subgroup_collapsed>
0

$$$$
ind_1,25270
                    3D
 Structure written by MMmdl.
 47 50  0  0  1  0            999 V2000
   -3.2899   -1.6896    0.1425 C   0  0  0  0  0  0
   -2.2323   -0.7753    0.0812 C   0  0  0  0  0  0
   -0.8674   -1.1801    0.0633 C   0  0  0  0  0  0
   -0.5802   -2.5562    0.1158 C   0  0  0  0  0  0
   -1.6304   -3.4703    0.1780 C   0  0  0  0  0  0
   -2.9548   -3.0426    0.1900 C   0  0  0  0  0  0
   -0.0626    0.0146   -0.0061 C   0  0  0  0  0  0
   -0.9470    1.1035   -0.0140 C   0  0  0  0  0  0
   -2.2307    0.5979    0.0222 N   0  0  0  0  0  0
   -0.6674    2.5192   -0.1542 C   0  0  0  0  0  0
   -1.6404    3.3360    0.2987 N   0  0  0  0  0  0
    0.3888    2.9241   -0.6414 O   0  0  0  0  0  0
   -1.6189    4.7996    0.2593 C   0  0  0  0  0  0
   -1.7112    5.4191   -1.1614 C   0  0  0  0  0  0
   -1.7409    6.9604   -1.1648 C   0  0  0  0  0  0
   -2.8052    7.5267   -0.2111 C   0  0  0  0  0  0
   -2.6185    6.9857    1.2152 C   0  0  0  0  0  0
   -2.6090    5.4450    1.2589 C   0  0  0  0  0  0
   -4.3221   -1.3714    0.1531 H   0  0  0  0  0  0
    0.4405   -2.9086    0.1105 H   0  0  0  0  0  0
   -1.4134   -4.5276    0.2179 H   0  0  0  0  0  0
   -3.7436   -3.7792    0.2385 H   0  0  0  0  0  0
   -3.0404    1.2005   -0.0030 H   0  0  0  0  0  0
   -2.4975    2.9182    0.6289 H   0  0  0  0  0  0
   -0.6352    5.0964    0.6327 H   0  0  0  0  0  0
   -0.8805    5.0799   -1.7817 H   0  0  0  0  0  0
   -2.6259    5.0653   -1.6396 H   0  0  0  0  0  0
   -0.7592    7.3402   -0.8767 H   0  0  0  0  0  0
   -1.9198    7.3242   -2.1773 H   0  0  0  0  0  0
   -2.7571    8.6162   -0.2044 H   0  0  0  0  0  0
   -3.8004    7.2667   -0.5753 H   0  0  0  0  0  0
   -1.6806    7.3641    1.6248 H   0  0  0  0  0  0
   -3.4075    7.3691    1.8633 H   0  0  0  0  0  0
   -3.6181    5.0997    1.0280 H   0  0  0  0  0  0
   -2.3866    5.1158    2.2750 H   0  0  0  0  0  0
    4.8466   -1.0555   -1.1287 C   0  0  0  0  0  0
    3.5571   -0.4909   -0.5831 C   0  0  0  0  0  0
    2.2245   -0.8065   -0.8209 C   0  0  0  0  0  0
    1.3981    0.0294   -0.0526 C   0  0  0  0  0  0
    2.2584    0.8525    0.6619 C   0  0  0  0  0  0
    3.5481    0.5326    0.3296 N   0  0  0  0  0  0
    4.3716    0.9825    0.7028 H   0  0  0  0  0  0
    4.6669   -1.8723   -1.8281 H   0  0  0  0  0  0
    5.4828   -1.4478   -0.3349 H   0  0  0  0  0  0
    5.4244   -0.2991   -1.6603 H   0  0  0  0  0  0
    1.8798   -1.5750   -1.4969 H   0  0  0  0  0  0
    2.0617    1.6402    1.3742 H   0  0  0  0  0  0
  1  2  2  0  0  0
  1  6  1  0  0  0
  1 19  1  0  0  0
  2  3  1  0  0  0
  2  9  1  0  0  0
  3  4  2  0  0  0
  3  7  1  0  0  0
  4  5  1  0  0  0
  4 20  1  0  0  0
  5  6  2  0  0  0
  5 21  1  0  0  0
  6 22  1  0  0  0
  7  8  2  0  0  0
  7 39  1  0  0  0
  8  9  1  0  0  0
  8 10  1  0  0  0
  9 23  1  0  0  0
 10 11  1  0  0  0
 10 12  2  0  0  0
 11 13  1  0  0  0
 11 24  1  0  0  0
 13 18  1  0  0  0
 13 14  1  0  0  0
 13 25  1  0  0  0
 14 15  1  0  0  0
 14 26  1  0  0  0
 14 27  1  0  0  0
 15 16  1  0  0  0
 15 28  1  0  0  0
 15 29  1  0  0  0
 16 17  1  0  0  0
 16 30  1  0  0  0
 16 31  1  0  0  0
 17 18  1  0  0  0
 17 32  1  0  0  0
 17 33  1  0  0  0
 18 34  1  0  0  0
 18 35  1  0  0  0
 36 37  1  0  0  0
 36 43  1  0  0  0
 36 44  1  0  0  0
 36 45  1  0  0  0
 37 41  1  0  0  0
 37 38  2  0  0  0
 38 39  1  0  0  0
 38 46  1  0  0  0
 39 40  2  0  0  0
 40 41  1  0  0  0
 40 47  1  0  0  0
 41 42  1  0  0  0
M  END
> <s_m_entry_id>
7858

> <s_m_entry_name>
entry

> <i_f3d_flags>
0

> <s_m_job_name>
adme_1000

> <r_psp_Prime_Energy>
-34132.2512796628

> <r_psp_Prime_Solv_GB>
-5184.98661156284

> <r_psp_Prime_Coulomb>
-26482.4163061296

> <r_psp_Prime_vdW>
-4063.51511636624

> <r_psp_Prime_Covalent>
4420.71866956516

> <i_psp_model_num>
0

> <r_psp_Prime_Lipo>
-2175.69914436125

> <s_psp_Prime_Energy_Force_Field>
S-OPLS

> <s_psp_Prime_Energy_Solvent_Model>
VSGB2.1

> <r_psp_Prime_Hbond>
-550.100236820512

> <r_psp_Prime_Packing>
-55.8446424272089

> <r_psp_Prime_SelfCont>
-40.4078915603482

> <r_psp_Memb1_x>
103.457542316003

> <r_psp_Memb1_y>
39.4731108300965

> <r_psp_Memb1_z>
48.7987221124676

> <r_psp_Memb2_x>
99.8134167309003

> <r_psp_Memb2_y>
2.81176945184187

> <r_psp_Memb2_z>
23.8404289603493

> <r_psp_MembDummyRadius>
4.45

> <r_psp_Prime_Bond_Covalent>
467.785870535883

> <r_psp_Prime_Bond_SGB>
49964.675589072

> <r_psp_Prime_Angle_Covalent>
2224.88470998694

> <r_psp_Prime_Angle_SGB>
-21649.9680054341

> <r_psp_Prime_Torsion_Covalent>
1728.04808904234

> <r_psp_Prime_NB14_LJ>
4236.57254357025

> <r_psp_Prime_NB14_Lipo>
0

> <r_psp_Prime_NB14_Elec>
25544.8919477095

> <r_psp_Prime_NB14_SGB>
-15618.385663638

> <r_psp_Prime_NBShort_LJ>
-7885.15882581601

> <r_psp_Prime_NBShort_Lipo>
-2175.69914436125

> <r_psp_Prime_NBShort_Elec>
-53043.9509095086

> <r_psp_Prime_NBShort_SGB>
18017.0940586017

> <r_psp_Prime_NBLong_LJ>
-414.928834120471

> <r_psp_Prime_NBLong_Lipo>
0

> <r_psp_Prime_NBLong_Elec>
1016.64265566946

> <r_psp_Prime_NBLong_SGB>
-1160.12612258046

> <r_psp_Prime_Self_SGB>
-34738.276467584

> <s_m_Source_Path>
F:\Dekstop_files\DAC4,5\Molecular Systems Desgn and Engineering\supplementary_str

> <s_m_Source_File>
1000_str.mae

> <i_m_Source_File_Index>
782

> <i_lp_mmshare_version>
53156

> <s_epik_input>
W2NIXTFbY0hdW2NIXVtjSF1jKGMxMiljKC1jKFtjSF1bbkhdMylbY0hdYzNbQ0gzXSljKFtuSF0yKUMoPU8pW05IXVtDSF00W0NIMl1bQ0gyXVtDSDJdW0NIMl1bQ0gyXTQ=

> <s_epik_cmdline>
J2VwaWtfcHl0aG9uJywgJy1waHQnLCAnMC4wJywgJy1waCcsICc3LjAnLCAnLXRuJywgJzgnLCAnLW1hJywgJzUwMCcsICctaW1hZScsICc8aW5maWxlLm1hZT4nLCAnLW9tYWUnLCAnPG91dGZpbGUubWFlPic=

> <r_lp_tautomer_probability>
1

> <r_epik_Ionization_Penalty>
  0.0000

> <r_epik_Ionization_Penalty_Charging>
  0.0000

> <r_epik_Ionization_Penalty_Neutral>
  0.0000

> <r_epik_State_Penalty>
  0.0000

> <r_epik_Charging_Adjusted_Penalty>
0

> <i_epik_Tot_Q>
0

> <i_epik_Tot_abs_Q>
0

> <s_lp_Force_Field>
S-OPLS

> <r_lp_Energy>
33.372723

> <b_lp_Chiralities_Consistent>
1

> <s_lp_Variant>
ind_1,25270-1

> <s_i_glide_gridfile>
glide-grid_mmpl3

> <i_i_glide_lignum>
1545

> <i_i_glide_rotatable_bonds>
4

> <r_i_docking_score>
-8.824995103909

> <r_i_glide_ligand_efficiency>
-0.367708129329542

> <r_i_glide_ligand_efficiency_sa>
-1.06065378192454

> <r_i_glide_ligand_efficiency_ln>
-2.11222628100368

> <r_i_glide_gscore>
-8.824995103909

> <r_i_glide_evdw>
-40.5477714538574

> <r_i_glide_ecoul>
-1.07890713214874

> <r_i_glide_energy>
-41.6266785860062

> <r_i_glide_einternal>
1.75842714309692

> <r_i_glide_emodel>
-61.0779195414499

> <i_i_glide_confnum>
71

> <i_i_glide_posenum>
141

> <r_i_glide_eff_state_penalty>
0

> <i_rge_num_r_groups>
1

> <r_rge_occupation_R1>
1

> <s_rge_R1>
25270

> <s_rge_R1_s_m_title>
25270

> <s_rge_R1_s_m_entry_id>
17268

> <s_rge_R1_s_m_entry_name>
eMol_BB_r-groups.657

> <s_rge_R1_s_m_smiles>
[*]c1cc(C)[nH]c1

> <b_rge_R1_b_sd_chiral_flag>
0

> <i_rge_R1_i_sd_version>
0

> <s_rge_R1_s_m_Source_File>
eMol_BB_r-groups-dedup.mae

> <i_rge_R1_i_m_Source_File_Index>
529

> <s_rge_R1_s_m_Source_Path>
/Users/konze/projects/pathfinder/r-groups

> <s_rge_R1_s_sd_Source_Path>
/Users/konze/projects/pathfinder/reactant sets/eMolecules

> <s_rge_R1_s_sd_Source_File>
eMol BB r-groups.mae

> <i_rge_R1_i_sd_Source_File_Index>
657

> <r_rge_R1_r_sd_MW>
81.1158

> <i_rge_R1_i_sd_RB>
0

> <i_rge_R1_i_sd_HeavyAtomCount>
6

> <i_rge_R1_i_sd_HBA>
0

> <i_rge_R1_i_sd_HBD>
1

> <r_rge_R1_r_sd_PSA>
15.79

> <i_rge_R1_i_sd_ChiralCenterCount>
0

> <i_rge_R1_i_sd_ChiralCenterCountAllPossible>
0

> <i_rge_R1_i_sd_RingCount>
1

> <r_rge_R1_r_sd_AlogP>
0.5534

> <s_rge_R1_s_sd_subgroup_title>
eMol BB r-groups

> <s_rge_R1_s_sd_subgroupid>
eMol BB r-groups

> <i_rge_R1_i_sd_subgroup_collapsed>
0

> <s_rge_R1_s_sd_Unique_SMILES_Stereo>
Cc1ccc[nH]1

> <i_rge_R1_i_sd_canvasUID>
598

> <s_rge_R1_s_canvas_Unique_SMILES_Stereo>
Cc1ccc[nH]1

> <s_psp_Prime_MMGBSA_Input_Structure_Hash>
2ccf976510b8e616c8c0dc0e6acb77c111d335af76c00818087437dd

> <i_psp_number_heavy_atoms>
24

> <r_psp_MMGBSA_dG_Bind>
-44.3406925286254

> <r_psp_MMGBSA_dG_Bind_Coulomb>
-7.38806989141449

> <r_psp_MMGBSA_dG_Bind_Covalent>
4.4595658575272

> <r_psp_MMGBSA_dG_Bind_Hbond>
-0.00263173733117128

> <r_psp_MMGBSA_dG_Bind_Lipo>
-23.648020892897

> <r_psp_MMGBSA_dG_Bind_Packing>
4.9737991503207e-014

> <r_psp_MMGBSA_dG_Bind_SelfCont>
7.105427357601e-015

> <r_psp_MMGBSA_dG_Bind_Solv_GB>
32.6620589416252

> <r_psp_MMGBSA_dG_Bind_vdW>
-50.4235948060318

> <r_psp_Lig_Strain_Energy>
4.91917290195181

> <r_psp_Lig_Strain_Coulomb>
-2.33163001511284

> <r_psp_Lig_Strain_Covalent>
4.45976672563948

> <r_psp_Lig_Strain_Hbond>
0

> <r_psp_Lig_Strain_Lipo>
0.0860885163556002

> <r_psp_Lig_Strain_Packing>
0

> <r_psp_Lig_Strain_SelfCont>
0

> <r_psp_Lig_Strain_Solv_GB>
0.502967252958769

> <r_psp_Lig_Strain_vdW>
2.20198042211081

> <r_psp_Ligand_Energy>
7.34045359961355

> <r_psp_Ligand_Coulomb>
-16.1124222951522

> <r_psp_Ligand_Covalent>
25.8525778862274

> <r_psp_Ligand_Hbond>
0

> <r_psp_Ligand_Lipo>
-1.52649113087013

> <r_psp_Ligand_Packing>
0

> <r_psp_Ligand_SelfCont>
0

> <r_psp_Ligand_Solv_GB>
-11.0968901418748

> <r_psp_Ligand_vdW>
10.2236792812833

> <r_psp_Complex_Energy>
-34132.2512796628

> <r_psp_Complex_Coulomb>
-26482.4163061296

> <r_psp_Complex_Covalent>
4420.71866956516

> <r_psp_Complex_Hbond>
-550.100236820512

> <r_psp_Complex_Lipo>
-2175.69914436125

> <r_psp_Complex_Packing>
-55.8446424272089

> <r_psp_Complex_SelfCont>
-40.4078915603482

> <r_psp_Complex_Solv_GB>
-5184.98661156284

> <r_psp_Complex_vdW>
-4063.51511636624

> <r_psp_Receptor_Energy>
-34095.2510407338

> <r_psp_Receptor_Coulomb>
-26458.915813943

> <r_psp_Receptor_Covalent>
4390.40652582141

> <r_psp_Receptor_Hbond>
-550.097605083181

> <r_psp_Receptor_Lipo>
-2150.52463233748

> <r_psp_Receptor_Packing>
-55.8446424272089

> <r_psp_Receptor_SelfCont>
-40.4078915603482

> <r_psp_Receptor_Solv_GB>
-5206.55178036259

> <r_psp_Receptor_vdW>
-4023.31520084149

> <r_psp_MMGBSA_dG_Bind(NS)>
-49.2598654305257

> <r_psp_MMGBSA_dG_Bind(NS)_Coulomb>
-5.05643987634176

> <r_psp_MMGBSA_dG_Bind(NS)_Covalent>
-0.000200868111278396

> <r_psp_MMGBSA_dG_Bind(NS)_Hbond>
-0.00263173733094391

> <r_psp_MMGBSA_dG_Bind(NS)_Lipo>
-23.7341094092476

> <r_psp_MMGBSA_dG_Bind(NS)_Packing>
0

> <r_psp_MMGBSA_dG_Bind(NS)_SelfCont>
0

> <r_psp_MMGBSA_dG_Bind(NS)_Solv_GB>
32.159091688668

> <r_psp_MMGBSA_dG_Bind(NS)_vdW>
-52.6255752281472

> <r_psp_Rec_Strain_Energy>
-5.0931703299284e-011

> <r_psp_Rec_Strain_Coulomb>
4.00177668780088e-011

> <r_psp_Rec_Strain_Covalent>
-9.09494701772928e-013

> <r_psp_Rec_Strain_Hbond>
-2.27373675443232e-013

> <r_psp_Rec_Strain_Lipo>
-5.00222085975111e-012

> <r_psp_Rec_Strain_Packing>
4.9737991503207e-014

> <r_psp_Rec_Strain_SelfCont>
7.105427357601e-015

> <r_psp_Rec_Strain_Solv_GB>
-1.81898940354586e-012

> <r_psp_Rec_Strain_vdW>
4.54747350886464e-012

> <r_psp_Prime_MMGBSA_ligand_efficiency>
-1.84752885535939

> <r_psp_Prime_MMGBSA_ligand_efficiency_sa>
-2.77129328303909

> <r_psp_Prime_MMGBSA_ligand_efficiency_ln>
-10.6127623838999

> <r_i_glide_lipo>
-5.07854031661271

> <r_i_glide_hbond>
0

> <r_i_glide_metal>
0

> <r_i_glide_rewards>
-2.28074470816434

> <r_i_glide_erotb>
0.723514563383224

> <r_i_glide_esite>
0

> <i_psp_ExecuteFunction_Internal_Entry_Index>
525

> <i_qp_#stars>
1

> <i_qp_#amine>
0

> <i_qp_#amidine>
0

> <i_qp_#acid>
0

> <i_qp_#amide>
0

> <i_qp_#rotor>
2

> <i_qp_#rtvFG>
0

> <i_qp_CNS>
-1

> <r_qp_mol_MW>
   321.421

> <r_qp_dipole>
     4.258

> <r_qp_SASA>
   640.003

> <r_qp_FOSA>
   332.433

> <r_qp_FISA>
    71.868

> <r_qp_PISA>
   235.701

> <r_qp_WPSA>
     0.000

> <r_qp_volume>
  1102.287

> <r_qp_donorHB>
     3.000

> <r_qp_accptHB>
     2.500

> <r_qp_dip^2/V>
   0.0164469

> <r_qp_ACxDN^.5/SA>
   0.0067658

> <r_qp_glob>
   0.8063301

> <r_qp_QPpolrz>
    38.926

> <r_qp_QPlogPC16>
    11.282

> <r_qp_QPlogPoct>
    18.427

> <r_qp_QPlogPw>
     9.767

> <r_qp_QPlogPo/w>
     4.448

> <r_qp_QPlogS>
    -6.182

> <r_qp_CIQPlogS>
    -5.261

> <r_qp_QPlogHERG>
    -5.790

> <r_qp_QPPCaco>
  2062.391

> <r_qp_QPlogBB>
    -0.294

> <r_qp_QPPMDCK>
  1081.802

> <r_qp_QPlogKp>
    -1.822

> <r_qp_IP(eV)>
     7.879

> <r_qp_EA(eV)>
     0.241

> <i_qp_#metab>
2

> <r_qp_QPlogKhsa>
     0.803

> <i_qp_HumanOralAbsorption>
3

> <r_qp_PercentHumanOralAbsorption>
   100.000

> <r_qp_SAfluorine>
     0.000

> <r_qp_SAamideO>
     0.000

> <r_qp_PSA>
    61.121

> <i_qp_#NandO>
4

> <i_qp_RuleOfFive>
0

> <i_qp_RuleOfThree>
1

> <i_qp_#ringatoms>
20

> <i_qp_#in34>
0

> <i_qp_#in56>
20

> <i_qp_#noncon>
6

> <i_qp_#nonHatm>
24

> <r_qp_Jm>
0.00318563603668578

> <s_m_subgroupid>
1000_str-imp1->adme_1000-out12

> <s_m_subgroup_title>
1000_str->adme_1000-out1

> <b_m_subgroup_collapsed>
0

$$$$
ind_1,25270
                    3D
 Structure written by MMmdl.
 47 50  0  0  1  0            999 V2000
   -3.3067   -1.6946    0.1408 C   0  0  0  0  0  0
   -2.2457   -0.7845    0.0779 C   0  0  0  0  0  0
   -0.8825   -1.1943    0.0617 C   0  0  0  0  0  0
   -0.6002   -2.5711    0.1210 C   0  0  0  0  0  0
   -1.6538   -3.4810    0.1857 C   0  0  0  0  0  0
   -2.9767   -3.0487    0.1936 C   0  0  0  0  0  0
   -0.0728   -0.0026   -0.0156 C   0  0  0  0  0  0
   -0.9527    1.0890   -0.0241 C   0  0  0  0  0  0
   -2.2384    0.5887    0.0154 N   0  0  0  0  0  0
   -0.6670    2.5025   -0.1688 C   0  0  0  0  0  0
   -1.6291    3.3249    0.2975 N   0  0  0  0  0  0
    0.3841    2.9006   -0.6726 O   0  0  0  0  0  0
   -1.6028    4.7884    0.2522 C   0  0  0  0  0  0
   -1.7263    5.4017   -1.1688 C   0  0  0  0  0  0
   -1.7525    6.9427   -1.1780 C   0  0  0  0  0  0
   -2.7947    7.5149   -0.2036 C   0  0  0  0  0  0
   -2.5745    6.9823    1.2214 C   0  0  0  0  0  0
   -2.5659    5.4417    1.2734 C   0  0  0  0  0  0
   -4.3378   -1.3729    0.1490 H   0  0  0  0  0  0
    0.4192   -2.9274    0.1196 H   0  0  0  0  0  0
   -1.4407   -4.5390    0.2309 H   0  0  0  0  0  0
   -3.7683   -3.7820    0.2434 H   0  0  0  0  0  0
   -3.0454    1.1948   -0.0097 H   0  0  0  0  0  0
   -2.4794    2.9116    0.6502 H   0  0  0  0  0  0
   -0.6091    5.0838    0.5995 H   0  0  0  0  0  0
   -0.9102    5.0583   -1.8062 H   0  0  0  0  0  0
   -2.6525    5.0481   -1.6245 H   0  0  0  0  0  0
   -0.7642    7.3206   -0.9116 H   0  0  0  0  0  0
   -1.9516    7.3037   -2.1878 H   0  0  0  0  0  0
   -2.7457    8.6044   -0.2053 H   0  0  0  0  0  0
   -3.7982    7.2532   -0.5430 H   0  0  0  0  0  0
   -1.6268    7.3617    1.6068 H   0  0  0  0  0  0
   -3.3475    7.3705    1.8859 H   0  0  0  0  0  0
   -3.5814    5.0970    1.0702 H   0  0  0  0  0  0
   -2.3185    5.1180    2.2857 H   0  0  0  0  0  0
    4.4720   -1.4901   -1.4424 C   0  0  0  0  0  0
    3.4610   -0.6492   -0.7011 C   0  0  0  0  0  0
    3.5991    0.4084    0.1858 C   0  0  0  0  0  0
    2.3220    0.8180    0.5803 C   0  0  0  0  0  0
    1.3877    0.0165   -0.0633 C   0  0  0  0  0  0
    2.1108   -0.8613   -0.8346 N   0  0  0  0  0  0
    1.7012   -1.5716   -1.4238 H   0  0  0  0  0  0
    5.4941   -1.1780   -1.2263 H   0  0  0  0  0  0
    4.3380   -1.4240   -2.5223 H   0  0  0  0  0  0
    4.3944   -2.5433   -1.1715 H   0  0  0  0  0  0
    4.5322    0.8398    0.5167 H   0  0  0  0  0  0
    2.0996    1.6204    1.2683 H   0  0  0  0  0  0
  1  2  2  0  0  0
  1  6  1  0  0  0
  1 19  1  0  0  0
  2  3  1  0  0  0
  2  9  1  0  0  0
  3  4  2  0  0  0
  3  7  1  0  0  0
  4  5  1  0  0  0
  4 20  1  0  0  0
  5  6  2  0  0  0
  5 21  1  0  0  0
  6 22  1  0  0  0
  7  8  2  0  0  0
  7 40  1  0  0  0
  8  9  1  0  0  0
  8 10  1  0  0  0
  9 23  1  0  0  0
 10 11  1  0  0  0
 10 12  2  0  0  0
 11 13  1  0  0  0
 11 24  1  0  0  0
 13 18  1  0  0  0
 13 14  1  0  0  0
 13 25  1  0  0  0
 14 15  1  0  0  0
 14 26  1  0  0  0
 14 27  1  0  0  0
 15 16  1  0  0  0
 15 28  1  0  0  0
 15 29  1  0  0  0
 16 17  1  0  0  0
 16 30  1  0  0  0
 16 31  1  0  0  0
 17 18  1  0  0  0
 17 32  1  0  0  0
 17 33  1  0  0  0
 18 34  1  0  0  0
 18 35  1  0  0  0
 36 37  1  0  0  0
 36 43  1  0  0  0
 36 44  1  0  0  0
 36 45  1  0  0  0
 37 41  1  0  0  0
 37 38  2  0  0  0
 38 39  1  0  0  0
 38 46  1  0  0  0
 39 40  2  0  0  0
 39 47  1  0  0  0
 40 41  1  0  0  0
 41 42  1  0  0  0
M  END
> <s_m_entry_id>
7910

> <s_m_entry_name>
entry

> <i_f3d_flags>
0

> <s_m_job_name>
adme_1000

> <r_psp_Prime_Energy>
-34127.2042339651

> <r_psp_Prime_Solv_GB>
-5188.38774603249

> <r_psp_Prime_Coulomb>
-26475.130858295

> <r_psp_Prime_vdW>
-4062.88214196321

> <r_psp_Prime_Covalent>
4420.30148612294

> <i_psp_model_num>
0

> <r_psp_Prime_Lipo>
-2174.75275069602

> <s_psp_Prime_Energy_Force_Field>
S-OPLS

> <s_psp_Prime_Energy_Solvent_Model>
VSGB2.1

> <r_psp_Prime_Hbond>
-550.099689113805

> <r_psp_Prime_Packing>
-55.8446424272089

> <r_psp_Prime_SelfCont>
-40.4078915603482

> <r_psp_Memb1_x>
103.457542316003

> <r_psp_Memb1_y>
39.4731108300965

> <r_psp_Memb1_z>
48.7987221124676

> <r_psp_Memb2_x>
99.8134167309003

> <r_psp_Memb2_y>
2.81176945184187

> <r_psp_Memb2_z>
23.8404289603493

> <r_psp_MembDummyRadius>
4.45

> <r_psp_Prime_Bond_Covalent>
467.27948794751

> <r_psp_Prime_Bond_SGB>
49972.3407764808

> <r_psp_Prime_Angle_Covalent>
2224.24568491188

> <r_psp_Prime_Angle_SGB>
-21649.295786375

> <r_psp_Prime_Torsion_Covalent>
1728.77631326355

> <r_psp_Prime_NB14_LJ>
4236.30983179948

> <r_psp_Prime_NB14_Lipo>
0

> <r_psp_Prime_NB14_Elec>
25555.6970908554

> <r_psp_Prime_NB14_SGB>
-15626.2300655935

> <r_psp_Prime_NBShort_LJ>
-7884.26482432656

> <r_psp_Prime_NBShort_Lipo>
-2174.75275069602

> <r_psp_Prime_NBShort_Elec>
-53047.8031593524

> <r_psp_Prime_NBShort_SGB>
18023.6537045139

> <r_psp_Prime_NBLong_LJ>
-414.927149436123

> <r_psp_Prime_NBLong_Lipo>
0

> <r_psp_Prime_NBLong_Elec>
1016.97521020205

> <r_psp_Prime_NBLong_SGB>
-1163.42520693162

> <r_psp_Prime_Self_SGB>
-34745.4311681271

> <s_m_Source_Path>
F:\Dekstop_files\DAC4,5\Molecular Systems Desgn and Engineering\supplementary_str

> <s_m_Source_File>
1000_str.mae

> <i_m_Source_File_Index>
834

> <i_lp_mmshare_version>
53156

> <s_epik_input>
W2NIXTFbY0hdW2NIXVtjSF1jKGMxMiljKC1jKFtuSF0zKVtjSF1bY0hdYzNbQ0gzXSljKFtuSF0yKUMoPU8pW05IXVtDSF00W0NIMl1bQ0gyXVtDSDJdW0NIMl1bQ0gyXTQ=

> <s_epik_cmdline>
J2VwaWtfcHl0aG9uJywgJy1waHQnLCAnMC4wJywgJy1waCcsICc3LjAnLCAnLXRuJywgJzgnLCAnLW1hJywgJzUwMCcsICctaW1hZScsICc8aW5maWxlLm1hZT4nLCAnLW9tYWUnLCAnPG91dGZpbGUubWFlPic=

> <r_lp_tautomer_probability>
1

> <r_epik_Ionization_Penalty>
  0.0000

> <r_epik_Ionization_Penalty_Charging>
  0.0000

> <r_epik_Ionization_Penalty_Neutral>
  0.0000

> <r_epik_State_Penalty>
  0.0000

> <r_epik_Charging_Adjusted_Penalty>
0

> <i_epik_Tot_Q>
0

> <i_epik_Tot_abs_Q>
0

> <s_lp_Force_Field>
S-OPLS

> <r_lp_Energy>
33.544698

> <b_lp_Chiralities_Consistent>
1

> <s_lp_Variant>
ind_1,25270-1

> <s_i_glide_gridfile>
glide-grid_mmpl3

> <i_i_glide_lignum>
1546

> <i_i_glide_rotatable_bonds>
4

> <r_i_docking_score>
-7.91587851705719

> <r_i_glide_ligand_efficiency>
-0.32982827154405

> <r_i_glide_ligand_efficiency_sa>
-0.951389364811426

> <r_i_glide_ligand_efficiency_ln>
-1.89463296512816

> <r_i_glide_gscore>
-7.91587851705719

> <r_i_glide_evdw>
-40.0361404418945

> <r_i_glide_ecoul>
-1.57200992107391

> <r_i_glide_energy>
-41.6081503629684

> <r_i_glide_einternal>
4.34126567840576

> <r_i_glide_emodel>
-56.5041509636507

> <i_i_glide_confnum>
37

> <i_i_glide_posenum>
337

> <r_i_glide_eff_state_penalty>
0

> <i_rge_num_r_groups>
1

> <r_rge_occupation_R1>
1

> <s_rge_R1>
25270

> <s_rge_R1_s_m_title>
25270

> <s_rge_R1_s_m_entry_id>
17269

> <s_rge_R1_s_m_entry_name>
eMol_BB_r-groups.657

> <s_rge_R1_s_m_smiles>
[*]c1ccc(C)[nH]1

> <b_rge_R1_b_sd_chiral_flag>
0

> <i_rge_R1_i_sd_version>
0

> <s_rge_R1_s_m_Source_File>
eMol_BB_r-groups-dedup.mae

> <i_rge_R1_i_m_Source_File_Index>
529

> <s_rge_R1_s_m_Source_Path>
/Users/konze/projects/pathfinder/r-groups

> <s_rge_R1_s_sd_Source_Path>
/Users/konze/projects/pathfinder/reactant sets/eMolecules

> <s_rge_R1_s_sd_Source_File>
eMol BB r-groups.mae

> <i_rge_R1_i_sd_Source_File_Index>
657

> <r_rge_R1_r_sd_MW>
81.1158

> <i_rge_R1_i_sd_RB>
0

> <i_rge_R1_i_sd_HeavyAtomCount>
6

> <i_rge_R1_i_sd_HBA>
0

> <i_rge_R1_i_sd_HBD>
1

> <r_rge_R1_r_sd_PSA>
15.79

> <i_rge_R1_i_sd_ChiralCenterCount>
0

> <i_rge_R1_i_sd_ChiralCenterCountAllPossible>
0

> <i_rge_R1_i_sd_RingCount>
1

> <r_rge_R1_r_sd_AlogP>
0.5534

> <s_rge_R1_s_sd_subgroup_title>
eMol BB r-groups

> <s_rge_R1_s_sd_subgroupid>
eMol BB r-groups

> <i_rge_R1_i_sd_subgroup_collapsed>
0

> <s_rge_R1_s_sd_Unique_SMILES_Stereo>
Cc1ccc[nH]1

> <i_rge_R1_i_sd_canvasUID>
598

> <s_rge_R1_s_canvas_Unique_SMILES_Stereo>
Cc1ccc[nH]1

> <s_psp_Prime_MMGBSA_Input_Structure_Hash>
c470da51a148b0e371611c0737e66871f5b19e2d5d0961d9f7b12bb7

> <i_psp_number_heavy_atoms>
24

> <r_psp_MMGBSA_dG_Bind>
-44.8863968464066

> <r_psp_MMGBSA_dG_Bind_Coulomb>
-1.2082974893965

> <r_psp_MMGBSA_dG_Bind_Covalent>
4.44937006329383

> <r_psp_MMGBSA_dG_Bind_Hbond>
-0.00208403062424622

> <r_psp_MMGBSA_dG_Bind_Lipo>
-22.8598686639471

> <r_psp_MMGBSA_dG_Bind_Packing>
4.9737991503207e-014

> <r_psp_MMGBSA_dG_Bind_SelfCont>
7.105427357601e-015

> <r_psp_MMGBSA_dG_Bind_Solv_GB>
25.9977389693995

> <r_psp_MMGBSA_dG_Bind_vdW>
-51.2632556950448

> <r_psp_Lig_Strain_Energy>
7.15971466630515

> <r_psp_Lig_Strain_Coulomb>
5.57405196187005

> <r_psp_Lig_Strain_Covalent>
4.44957093140763

> <r_psp_Lig_Strain_Hbond>
0

> <r_psp_Lig_Strain_Lipo>
0.0761873468218712

> <r_psp_Lig_Strain_Packing>
0

> <r_psp_Lig_Strain_SelfCont>
0

> <r_psp_Lig_Strain_Solv_GB>
-1.57341703915701

> <r_psp_Lig_Strain_vdW>
-1.3666785346374

> <r_psp_Ligand_Energy>
12.9332036150696

> <r_psp_Ligand_Coulomb>
-15.006746862586

> <r_psp_Ligand_Covalent>
25.4455902382342

> <r_psp_Ligand_Hbond>
0

> <r_psp_Ligand_Lipo>
-1.36824969459778

> <r_psp_Ligand_Packing>
0

> <r_psp_Ligand_SelfCont>
0

> <r_psp_Ligand_Solv_GB>
-7.83370463930446

> <r_psp_Ligand_vdW>
11.6963145733236

> <r_psp_Complex_Energy>
-34127.2042339651

> <r_psp_Complex_Coulomb>
-26475.130858295

> <r_psp_Complex_Covalent>
4420.30148612294

> <r_psp_Complex_Hbond>
-550.099689113805

> <r_psp_Complex_Lipo>
-2174.75275069602

> <r_psp_Complex_Packing>
-55.8446424272089

> <r_psp_Complex_SelfCont>
-40.4078915603482

> <r_psp_Complex_Solv_GB>
-5188.38774603249

> <r_psp_Complex_vdW>
-4062.88214196321

> <r_psp_Receptor_Energy>
-34095.2510407338

> <r_psp_Receptor_Coulomb>
-26458.915813943

> <r_psp_Receptor_Covalent>
4390.40652582141

> <r_psp_Receptor_Hbond>
-550.097605083181

> <r_psp_Receptor_Lipo>
-2150.52463233748

> <r_psp_Receptor_Packing>
-55.8446424272089

> <r_psp_Receptor_SelfCont>
-40.4078915603482

> <r_psp_Receptor_Solv_GB>
-5206.55178036259

> <r_psp_Receptor_vdW>
-4023.31520084149

> <r_psp_MMGBSA_dG_Bind(NS)>
-52.0461115126673

> <r_psp_MMGBSA_dG_Bind(NS)_Coulomb>
-6.7823494513068

> <r_psp_MMGBSA_dG_Bind(NS)_Covalent>
-0.000200868113097386

> <r_psp_MMGBSA_dG_Bind(NS)_Hbond>
-0.00208403062401885

> <r_psp_MMGBSA_dG_Bind(NS)_Lipo>
-22.9360560107639

> <r_psp_MMGBSA_dG_Bind(NS)_Packing>
0

> <r_psp_MMGBSA_dG_Bind(NS)_SelfCont>
0

> <r_psp_MMGBSA_dG_Bind(NS)_Solv_GB>
27.5711560085583

> <r_psp_MMGBSA_dG_Bind(NS)_vdW>
-49.8965771604121

> <r_psp_Rec_Strain_Energy>
-5.0931703299284e-011

> <r_psp_Rec_Strain_Coulomb>
4.00177668780088e-011

> <r_psp_Rec_Strain_Covalent>
-9.09494701772928e-013

> <r_psp_Rec_Strain_Hbond>
-2.27373675443232e-013

> <r_psp_Rec_Strain_Lipo>
-5.00222085975111e-012

> <r_psp_Rec_Strain_Packing>
4.9737991503207e-014

> <r_psp_Rec_Strain_SelfCont>
7.105427357601e-015

> <r_psp_Rec_Strain_Solv_GB>
-1.81898940354586e-012

> <r_psp_Rec_Strain_vdW>
4.54747350886464e-012

> <r_psp_Prime_MMGBSA_ligand_efficiency>
-1.87026653526694

> <r_psp_Prime_MMGBSA_ligand_efficiency_sa>
-2.80539980290041

> <r_psp_Prime_MMGBSA_ligand_efficiency_ln>
-10.7433744678844

> <r_i_glide_lipo>
-4.15449609177771

> <r_i_glide_hbond>
0

> <r_i_glide_metal>
0

> <r_i_glide_rewards>
-2.24728847840689

> <r_i_glide_erotb>
0.723514563383224

> <r_i_glide_esite>
0

> <i_psp_ExecuteFunction_Internal_Entry_Index>
1946

> <i_qp_#stars>
0

> <i_qp_#amine>
0

> <i_qp_#amidine>
0

> <i_qp_#acid>
0

> <i_qp_#amide>
0

> <i_qp_#rotor>
2

> <i_qp_#rtvFG>
0

> <i_qp_CNS>
-1

> <r_qp_mol_MW>
   321.421

> <r_qp_dipole>
     6.736

> <r_qp_SASA>
   644.022

> <r_qp_FOSA>
   330.959

> <r_qp_FISA>
    56.331

> <r_qp_PISA>
   256.731

> <r_qp_WPSA>
     0.000

> <r_qp_volume>
  1107.491

> <r_qp_donorHB>
     3.000

> <r_qp_accptHB>
     2.500

> <r_qp_dip^2/V>
   0.0409739

> <r_qp_ACxDN^.5/SA>
   0.0067236

> <r_qp_glob>
   0.8038187

> <r_qp_QPpolrz>
    39.335

> <r_qp_QPlogPC16>
    11.373

> <r_qp_QPlogPoct>
    18.855

> <r_qp_QPlogPw>
     9.814

> <r_qp_QPlogPo/w>
     4.612

> <r_qp_QPlogS>
    -6.254

> <r_qp_CIQPlogS>
    -5.261

> <r_qp_QPlogHERG>
    -5.931

> <r_qp_QPPCaco>
  2895.401

> <r_qp_QPlogBB>
    -0.138

> <r_qp_QPPMDCK>
  1560.999

> <r_qp_QPlogKp>
    -1.461

> <r_qp_IP(eV)>
     7.930

> <r_qp_EA(eV)>
     0.518

> <i_qp_#metab>
2

> <r_qp_QPlogKhsa>
     0.816

> <i_qp_HumanOralAbsorption>
1

> <r_qp_PercentHumanOralAbsorption>
   100.000

> <r_qp_SAfluorine>
     0.000

> <r_qp_SAamideO>
     0.000

> <r_qp_PSA>
    59.080

> <i_qp_#NandO>
4

> <i_qp_RuleOfFive>
0

> <i_qp_RuleOfThree>
1

> <i_qp_#ringatoms>
20

> <i_qp_#in34>
0

> <i_qp_#in56>
20

> <i_qp_#noncon>
6

> <i_qp_#nonHatm>
24

> <r_qp_Jm>
0.00619002361541285

> <s_m_subgroupid>
1000_str-imp1->adme_1000-out12

> <s_m_subgroup_title>
1000_str->adme_1000-out1

> <b_m_subgroup_collapsed>
0

$$$$
ind_1,25272
                    3D
 Structure written by MMmdl.
 50 53  0  0  1  0            999 V2000
   -3.3087    1.6510   -0.8342 C   0  0  0  0  0  0
   -2.3066    0.6891   -0.6649 C   0  0  0  0  0  0
   -0.9501    1.0320   -0.4053 C   0  0  0  0  0  0
   -0.6112    2.3936   -0.3169 C   0  0  0  0  0  0
   -1.6055    3.3556   -0.4843 C   0  0  0  0  0  0
   -2.9244    2.9885   -0.7371 C   0  0  0  0  0  0
   -0.1991   -0.1928   -0.2899 C   0  0  0  0  0  0
   -1.1135   -1.2384   -0.4719 C   0  0  0  0  0  0
   -2.3549   -0.6833   -0.7069 N   0  0  0  0  0  0
   -0.8633   -2.6639   -0.5326 C   0  0  0  0  0  0
   -1.9455   -3.4415   -0.3239 N   0  0  0  0  0  0
    0.2585   -3.1112   -0.7744 O   0  0  0  0  0  0
   -1.9588   -4.9061   -0.3298 C   0  0  0  0  0  0
   -1.1910   -5.5752    0.8422 C   0  0  0  0  0  0
   -1.2634   -7.1149    0.8295 C   0  0  0  0  0  0
   -2.7063   -7.6314    0.7095 C   0  0  0  0  0  0
   -3.4100   -7.0384   -0.5216 C   0  0  0  0  0  0
   -3.3757   -5.4972   -0.5276 C   0  0  0  0  0  0
   -4.3354    1.3802   -1.0325 H   0  0  0  0  0  0
    0.4072    2.6966   -0.1230 H   0  0  0  0  0  0
   -1.3489    4.4027   -0.4174 H   0  0  0  0  0  0
   -3.6695    3.7605   -0.8625 H   0  0  0  0  0  0
   -3.1673   -1.2536   -0.8915 H   0  0  0  0  0  0
   -2.8007   -2.9960   -0.0263 H   0  0  0  0  0  0
   -1.4198   -5.2062   -1.2324 H   0  0  0  0  0  0
   -0.1435   -5.2711    0.8367 H   0  0  0  0  0  0
   -1.6144   -5.2256    1.7851 H   0  0  0  0  0  0
   -0.6727   -7.4961   -0.0052 H   0  0  0  0  0  0
   -0.8007   -7.5141    1.7330 H   0  0  0  0  0  0
   -2.7075   -8.7204    0.6496 H   0  0  0  0  0  0
   -3.2640   -7.3743    1.6112 H   0  0  0  0  0  0
   -2.9308   -7.4132   -1.4274 H   0  0  0  0  0  0
   -4.4431   -7.3859   -0.5605 H   0  0  0  0  0  0
   -4.0195   -5.1469    0.2810 H   0  0  0  0  0  0
   -3.8111   -5.1314   -1.4587 H   0  0  0  0  0  0
    1.2959   -0.2576   -0.0171 C   0  0  0  0  0  0
    2.0967    0.1246   -1.2469 C   0  0  0  0  0  0
    2.9954    1.1892   -1.3863 C   0  0  0  0  0  0
    3.4469    2.2686   -0.4283 C   0  0  0  0  0  0
    3.4939    1.1552   -2.6650 N   0  0  0  0  0  0
    2.9527    0.1062   -3.3516 C   0  0  0  0  0  0
    2.0903   -0.5391   -2.4869 C   0  0  0  0  0  0
    4.1643    1.8099   -3.0414 H   0  0  0  0  0  0
    1.5368    0.3923    0.8237 H   0  0  0  0  0  0
    1.5993   -1.2476    0.3206 H   0  0  0  0  0  0
    2.9796    2.1794    0.5519 H   0  0  0  0  0  0
    3.2058    3.2632   -0.8046 H   0  0  0  0  0  0
    4.5251    2.2386   -0.2696 H   0  0  0  0  0  0
    3.2274   -0.0846   -4.3784 H   0  0  0  0  0  0
    1.5028   -1.4141   -2.7242 H   0  0  0  0  0  0
  1  2  2  0  0  0
  1  6  1  0  0  0
  1 19  1  0  0  0
  2  3  1  0  0  0
  2  9  1  0  0  0
  3  4  2  0  0  0
  3  7  1  0  0  0
  4  5  1  0  0  0
  4 20  1  0  0  0
  5  6  2  0  0  0
  5 21  1  0  0  0
  6 22  1  0  0  0
  7  8  2  0  0  0
  7 36  1  0  0  0
  8  9  1  0  0  0
  8 10  1  0  0  0
  9 23  1  0  0  0
 10 11  1  0  0  0
 10 12  2  0  0  0
 11 13  1  0  0  0
 11 24  1  0  0  0
 13 18  1  0  0  0
 13 14  1  0  0  0
 13 25  1  0  0  0
 14 15  1  0  0  0
 14 26  1  0  0  0
 14 27  1  0  0  0
 15 16  1  0  0  0
 15 28  1  0  0  0
 15 29  1  0  0  0
 16 17  1  0  0  0
 16 30  1  0  0  0
 16 31  1  0  0  0
 17 18  1  0  0  0
 17 32  1  0  0  0
 17 33  1  0  0  0
 18 34  1  0  0  0
 18 35  1  0  0  0
 36 37  1  0  0  0
 36 44  1  0  0  0
 36 45  1  0  0  0
 37 42  1  0  0  0
 37 38  2  0  0  0
 38 39  1  0  0  0
 38 40  1  0  0  0
 39 46  1  0  0  0
 39 47  1  0  0  0
 39 48  1  0  0  0
 40 41  1  0  0  0
 40 43  1  0  0  0
 41 42  2  0  0  0
 41 49  1  0  0  0
 42 50  1  0  0  0
M  END
> <s_m_entry_id>
7950

> <s_m_entry_name>
entry

> <i_f3d_flags>
0

> <s_m_job_name>
adme_1000

> <r_psp_Prime_Energy>
-34098.9051439737

> <r_psp_Prime_Solv_GB>
-5184.49168939688

> <r_psp_Prime_Coulomb>
-26469.7843709937

> <r_psp_Prime_vdW>
-4047.37840626099

> <r_psp_Prime_Covalent>
4429.53781546944

> <i_psp_model_num>
0

> <r_psp_Prime_Lipo>
-2180.40490532069

> <s_psp_Prime_Energy_Force_Field>
S-OPLS

> <s_psp_Prime_Energy_Solvent_Model>
VSGB2.1

> <r_psp_Prime_Hbond>
-550.131053423487

> <r_psp_Prime_Packing>
-55.8446424870474

> <r_psp_Prime_SelfCont>
-40.4078915603482

> <r_psp_Memb1_x>
103.457542316003

> <r_psp_Memb1_y>
39.4731108300965

> <r_psp_Memb1_z>
48.7987221124676

> <r_psp_Memb2_x>
99.8134167309003

> <r_psp_Memb2_y>
2.81176945184187

> <r_psp_Memb2_z>
23.8404289603493

> <r_psp_MembDummyRadius>
4.45

> <r_psp_Prime_Bond_Covalent>
467.472135580585

> <r_psp_Prime_Bond_SGB>
49969.0553094456

> <r_psp_Prime_Angle_Covalent>
2232.270734518

> <r_psp_Prime_Angle_SGB>
-21650.4137149784

> <r_psp_Prime_Torsion_Covalent>
1729.79494537085

> <r_psp_Prime_NB14_LJ>
4237.78671594378

> <r_psp_Prime_NB14_Lipo>
0

> <r_psp_Prime_NB14_Elec>
25585.643053745

> <r_psp_Prime_NB14_SGB>
-15625.4811884793

> <r_psp_Prime_NBShort_LJ>
-7870.29388606802

> <r_psp_Prime_NBShort_Lipo>
-2180.40490532069

> <r_psp_Prime_NBShort_Elec>
-53069.9770630731

> <r_psp_Prime_NBShort_SGB>
18024.0443019917

> <r_psp_Prime_NBLong_LJ>
-414.871236136744

> <r_psp_Prime_NBLong_Lipo>
0

> <r_psp_Prime_NBLong_Elec>
1014.54963833447

> <r_psp_Prime_NBLong_SGB>
-1160.32626914165

> <r_psp_Prime_Self_SGB>
-34741.3701282347

> <s_m_Source_Path>
F:\Dekstop_files\DAC4,5\Molecular Systems Desgn and Engineering\supplementary_str

> <s_m_Source_File>
1000_str.mae

> <i_m_Source_File_Index>
874

> <i_lp_mmshare_version>
53156

> <s_epik_input>
W2NIXTFbY0hdW25IXWMoW0NIM10pYzFbQ0gyXWMoYyhjMjMpW2NIXVtjSF1bY0hdW2NIXTIpYyhbbkhdMylDKD1PKVtOSF1bQ0hdNFtDSDJdW0NIMl1bQ0gyXVtDSDJdW0NIMl00

> <s_epik_cmdline>
J2VwaWtfcHl0aG9uJywgJy1waHQnLCAnMC4wJywgJy1waCcsICc3LjAnLCAnLXRuJywgJzgnLCAnLW1hJywgJzUwMCcsICctaW1hZScsICc8aW5maWxlLm1hZT4nLCAnLW9tYWUnLCAnPG91dGZpbGUubWFlPic=

> <r_lp_tautomer_probability>
1

> <r_epik_Ionization_Penalty>
  0.0000

> <r_epik_Ionization_Penalty_Charging>
  0.0000

> <r_epik_Ionization_Penalty_Neutral>
  0.0000

> <r_epik_State_Penalty>
  0.0000

> <r_epik_Charging_Adjusted_Penalty>
0

> <i_epik_Tot_Q>
0

> <i_epik_Tot_abs_Q>
0

> <s_lp_Force_Field>
S-OPLS

> <r_lp_Energy>
38.523633

> <b_lp_Chiralities_Consistent>
1

> <s_lp_Variant>
ind_1,25272-1

> <s_i_glide_gridfile>
glide-grid_mmpl3

> <i_i_glide_lignum>
558

> <i_i_glide_rotatable_bonds>
5

> <r_i_docking_score>
-9.22364933683631

> <r_i_glide_ligand_efficiency>
-0.368945973473452

> <r_i_glide_ligand_efficiency_sa>
-1.07880456972108

> <r_i_glide_ligand_efficiency_ln>
-2.18628130329587

> <r_i_glide_gscore>
-9.22364933683631

> <r_i_glide_evdw>
-40.8300933837891

> <r_i_glide_ecoul>
-1.38674700260162

> <r_i_glide_energy>
-42.2168403863907

> <r_i_glide_einternal>
1.57067966461182

> <r_i_glide_emodel>
-64.6980426991557

> <i_i_glide_confnum>
71

> <i_i_glide_posenum>
47

> <r_i_glide_eff_state_penalty>
0

> <i_rge_num_r_groups>
1

> <r_rge_occupation_R1>
1

> <s_rge_R1>
25272

> <s_rge_R1_s_m_title>
25272

> <s_rge_R1_s_m_entry_id>
16381

> <s_rge_R1_s_m_entry_name>
eMol_BB_r-groups.230

> <s_rge_R1_s_m_smiles>
[*]Cc1c(C)[nH]cc1

> <b_rge_R1_b_sd_chiral_flag>
0

> <i_rge_R1_i_sd_version>
0

> <s_rge_R1_s_m_Source_File>
eMol_BB_r-groups-dedup.mae

> <i_rge_R1_i_m_Source_File_Index>
157

> <s_rge_R1_s_m_Source_Path>
/Users/konze/projects/pathfinder/r-groups

> <s_rge_R1_s_sd_Source_Path>
/Users/konze/projects/pathfinder/reactant sets/eMolecules

> <s_rge_R1_s_sd_Source_File>
eMol BB r-groups.mae

> <i_rge_R1_i_sd_Source_File_Index>
230

> <r_rge_R1_r_sd_MW>
95.1424

> <i_rge_R1_i_sd_RB>
0

> <i_rge_R1_i_sd_HeavyAtomCount>
7

> <i_rge_R1_i_sd_HBA>
0

> <i_rge_R1_i_sd_HBD>
1

> <r_rge_R1_r_sd_PSA>
15.79

> <i_rge_R1_i_sd_ChiralCenterCount>
0

> <i_rge_R1_i_sd_ChiralCenterCountAllPossible>
0

> <i_rge_R1_i_sd_RingCount>
1

> <r_rge_R1_r_sd_AlogP>
1.0396

> <s_rge_R1_s_sd_subgroup_title>
eMol BB r-groups

> <s_rge_R1_s_sd_subgroupid>
eMol BB r-groups

> <i_rge_R1_i_sd_subgroup_collapsed>
0

> <s_rge_R1_s_sd_Unique_SMILES_Stereo>
Cc1c(C)[nH]cc1

> <i_rge_R1_i_sd_canvasUID>
175

> <s_rge_R1_s_canvas_Unique_SMILES_Stereo>
Cc1c(C)[nH]cc1

> <s_psp_Prime_MMGBSA_Input_Structure_Hash>
db2d175a94452b0ac1cd9b77c836d1be83263ed14feefc271f9cf54b

> <i_psp_number_heavy_atoms>
25

> <r_psp_MMGBSA_dG_Bind>
-25.8946491424649

> <r_psp_MMGBSA_dG_Bind_Coulomb>
-5.02668305962652

> <r_psp_MMGBSA_dG_Bind_Covalent>
9.58449480626496

> <r_psp_MMGBSA_dG_Bind_Hbond>
-0.0334483403063359

> <r_psp_MMGBSA_dG_Bind_Lipo>
-27.6475539223907

> <r_psp_MMGBSA_dG_Bind_Packing>
-5.98385412331481e-008

> <r_psp_MMGBSA_dG_Bind_SelfCont>
7.105427357601e-015

> <r_psp_MMGBSA_dG_Bind_Solv_GB>
32.3130206357055

> <r_psp_MMGBSA_dG_Bind_vdW>
-35.0844792021962

> <r_psp_Lig_Strain_Energy>
10.6607279853312

> <r_psp_Lig_Strain_Coulomb>
-0.365397270372164

> <r_psp_Lig_Strain_Covalent>
9.58469567437713

> <r_psp_Lig_Strain_Hbond>
0

> <r_psp_Lig_Strain_Lipo>
-0.0146696944996507

> <r_psp_Lig_Strain_Packing>
0

> <r_psp_Lig_Strain_SelfCont>
0

> <r_psp_Lig_Strain_Solv_GB>
0.440420919421953

> <r_psp_Lig_Strain_vdW>
1.015678356404

> <r_psp_Ligand_Energy>
22.2405459026132

> <r_psp_Ligand_Coulomb>
-5.84187399103328

> <r_psp_Ligand_Covalent>
29.5467948417629

> <r_psp_Ligand_Hbond>
0

> <r_psp_Ligand_Lipo>
-2.23271906081762

> <r_psp_Ligand_Packing>
0

> <r_psp_Ligand_SelfCont>
0

> <r_psp_Ligand_Solv_GB>
-10.2529296699956

> <r_psp_Ligand_vdW>
11.0212737826968

> <r_psp_Complex_Energy>
-34098.9051439737

> <r_psp_Complex_Coulomb>
-26469.7843709937

> <r_psp_Complex_Covalent>
4429.53781546944

> <r_psp_Complex_Hbond>
-550.131053423487

> <r_psp_Complex_Lipo>
-2180.40490532069

> <r_psp_Complex_Packing>
-55.8446424870474

> <r_psp_Complex_SelfCont>
-40.4078915603482

> <r_psp_Complex_Solv_GB>
-5184.49168939688

> <r_psp_Complex_vdW>
-4047.37840626099

> <r_psp_Receptor_Energy>
-34095.2510407338

> <r_psp_Receptor_Coulomb>
-26458.915813943

> <r_psp_Receptor_Covalent>
4390.40652582141

> <r_psp_Receptor_Hbond>
-550.097605083181

> <r_psp_Receptor_Lipo>
-2150.52463233748

> <r_psp_Receptor_Packing>
-55.8446424272089

> <r_psp_Receptor_SelfCont>
-40.4078915603482

> <r_psp_Receptor_Solv_GB>
-5206.55178036259

> <r_psp_Receptor_vdW>
-4023.31520084149

> <r_psp_MMGBSA_dG_Bind(NS)>
-36.5553771277482

> <r_psp_MMGBSA_dG_Bind(NS)_Coulomb>
-4.6612857892942

> <r_psp_MMGBSA_dG_Bind(NS)_Covalent>
-0.000200868111278396

> <r_psp_MMGBSA_dG_Bind(NS)_Hbond>
-0.0334483403061085

> <r_psp_MMGBSA_dG_Bind(NS)_Lipo>
-27.6328842278858

> <r_psp_MMGBSA_dG_Bind(NS)_Packing>
-5.98385909711396e-008

> <r_psp_MMGBSA_dG_Bind(NS)_SelfCont>
0

> <r_psp_MMGBSA_dG_Bind(NS)_Solv_GB>
31.8725997162846

> <r_psp_MMGBSA_dG_Bind(NS)_vdW>
-36.1001575586047

> <r_psp_Rec_Strain_Energy>
-5.0931703299284e-011

> <r_psp_Rec_Strain_Coulomb>
4.00177668780088e-011

> <r_psp_Rec_Strain_Covalent>
-9.09494701772928e-013

> <r_psp_Rec_Strain_Hbond>
-2.27373675443232e-013

> <r_psp_Rec_Strain_Lipo>
-5.00222085975111e-012

> <r_psp_Rec_Strain_Packing>
4.9737991503207e-014

> <r_psp_Rec_Strain_SelfCont>
7.105427357601e-015

> <r_psp_Rec_Strain_Solv_GB>
-1.81898940354586e-012

> <r_psp_Rec_Strain_vdW>
4.54747350886464e-012

> <r_psp_Prime_MMGBSA_ligand_efficiency>
-1.0357859656986

> <r_psp_Prime_MMGBSA_ligand_efficiency_sa>
-1.5536789485479

> <r_psp_Prime_MMGBSA_ligand_efficiency_ln>
-6.13780784677963

> <r_i_glide_lipo>
-5.5794293271621

> <r_i_glide_hbond>
0

> <r_i_glide_metal>
0

> <r_i_glide_rewards>
-2.23336483428959

> <r_i_glide_erotb>
0.838661544195077

> <r_i_glide_esite>
0

> <i_psp_ExecuteFunction_Internal_Entry_Index>
152

> <i_qp_#stars>
0

> <i_qp_#amine>
0

> <i_qp_#amidine>
0

> <i_qp_#acid>
0

> <i_qp_#amide>
0

> <i_qp_#rotor>
4

> <i_qp_#rtvFG>
0

> <i_qp_CNS>
-1

> <r_qp_mol_MW>
   335.448

> <r_qp_dipole>
     3.915

> <r_qp_SASA>
   651.805

> <r_qp_FOSA>
   341.436

> <r_qp_FISA>
    69.308

> <r_qp_PISA>
   241.062

> <r_qp_WPSA>
     0.000

> <r_qp_volume>
  1143.949

> <r_qp_donorHB>
     3.000

> <r_qp_accptHB>
     2.500

> <r_qp_dip^2/V>
   0.0133969

> <r_qp_ACxDN^.5/SA>
   0.0066433

> <r_qp_glob>
   0.8115552

> <r_qp_QPpolrz>
    39.361

> <r_qp_QPlogPC16>
    11.707

> <r_qp_QPlogPoct>
    18.497

> <r_qp_QPlogPw>
     9.373

> <r_qp_QPlogPo/w>
     4.738

> <r_qp_QPlogS>
    -6.068

> <r_qp_CIQPlogS>
    -5.546

> <r_qp_QPlogHERG>
    -5.731

> <r_qp_QPPCaco>
  2180.973

> <r_qp_QPlogBB>
    -0.379

> <r_qp_QPPMDCK>
  1149.188

> <r_qp_QPlogKp>
    -1.564

> <r_qp_IP(eV)>
     8.204

> <r_qp_EA(eV)>
     0.233

> <i_qp_#metab>
2

> <r_qp_QPlogKhsa>
     0.834

> <i_qp_HumanOralAbsorption>
3

> <r_qp_PercentHumanOralAbsorption>
   100.000

> <r_qp_SAfluorine>
     0.000

> <r_qp_SAamideO>
     0.000

> <r_qp_PSA>
    62.241

> <i_qp_#NandO>
4

> <i_qp_RuleOfFive>
0

> <i_qp_RuleOfThree>
1

> <i_qp_#ringatoms>
20

> <i_qp_#in34>
0

> <i_qp_#in56>
20

> <i_qp_#noncon>
6

> <i_qp_#nonHatm>
25

> <r_qp_Jm>
0.00783478162487585

> <s_m_subgroupid>
1000_str-imp1->adme_1000-out12

> <s_m_subgroup_title>
1000_str->adme_1000-out1

> <b_m_subgroup_collapsed>
0

$$$$
ind_1,25272
                    3D
 Structure written by MMmdl.
 50 53  0  0  1  0            999 V2000
   -3.2189    1.6222    0.0451 C   0  0  0  0  0  0
   -2.1897    0.6767   -0.0244 C   0  0  0  0  0  0
   -0.8175    1.0416   -0.1206 C   0  0  0  0  0  0
   -0.4916    2.4088   -0.1490 C   0  0  0  0  0  0
   -1.5129    3.3544   -0.0797 C   0  0  0  0  0  0
   -2.8462    2.9660    0.0160 C   0  0  0  0  0  0
   -0.0403   -0.1715   -0.1710 C   0  0  0  0  0  0
   -0.9534   -1.2313   -0.0981 C   0  0  0  0  0  0
   -2.2235   -0.6967   -0.0271 N   0  0  0  0  0  0
   -0.7027   -2.6546   -0.1925 C   0  0  0  0  0  0
   -1.6744   -3.4375    0.3192 N   0  0  0  0  0  0
    0.3315   -3.0947   -0.6968 O   0  0  0  0  0  0
   -1.6766   -4.9020    0.3325 C   0  0  0  0  0  0
   -2.6390   -5.4954    1.3897 C   0  0  0  0  0  0
   -2.6704   -7.0365    1.4031 C   0  0  0  0  0  0
   -2.9190   -7.6248    0.0050 C   0  0  0  0  0  0
   -1.8834   -7.1098   -1.0075 C   0  0  0  0  0  0
   -1.8294   -5.5700   -1.0606 C   0  0  0  0  0  0
   -4.2574    1.3345    0.1173 H   0  0  0  0  0  0
    0.5367    2.7292   -0.2245 H   0  0  0  0  0  0
   -1.2662    4.4060   -0.1012 H   0  0  0  0  0  0
   -3.6119    3.7261    0.0678 H   0  0  0  0  0  0
   -3.0465   -1.2803    0.0073 H   0  0  0  0  0  0
   -2.5138   -2.9942    0.6619 H   0  0  0  0  0  0
   -0.6847   -5.2014    0.6813 H   0  0  0  0  0  0
   -2.3767   -5.1325    2.3847 H   0  0  0  0  0  0
   -3.6510   -5.1441    1.1816 H   0  0  0  0  0  0
   -1.7224   -7.4137    1.7903 H   0  0  0  0  0  0
   -3.4388   -7.3851    2.0942 H   0  0  0  0  0  0
   -2.8859   -8.7140    0.0492 H   0  0  0  0  0  0
   -3.9235   -7.3628   -0.3309 H   0  0  0  0  0  0
   -0.8977   -7.4958   -0.7429 H   0  0  0  0  0  0
   -2.1059   -7.5063   -1.9990 H   0  0  0  0  0  0
   -2.7551   -5.2182   -1.5190 H   0  0  0  0  0  0
   -1.0156   -5.2677   -1.7211 H   0  0  0  0  0  0
    3.5421    2.1669   -1.3339 C   0  0  0  0  0  0
    2.8423    1.1013   -2.1461 C   0  0  0  0  0  0
    1.9511    0.1285   -1.6792 C   0  0  0  0  0  0
    1.4776   -0.2157   -0.2797 C   0  0  0  0  0  0
    1.5237   -0.6014   -2.7628 N   0  0  0  0  0  0
    2.0674   -0.0993   -3.9104 C   0  0  0  0  0  0
    2.8630    0.9693   -3.5448 C   0  0  0  0  0  0
    0.8869   -1.3841   -2.7157 H   0  0  0  0  0  0
    2.9501    2.4744   -0.4722 H   0  0  0  0  0  0
    3.7128    3.0727   -1.9164 H   0  0  0  0  0  0
    4.5063    1.8229   -0.9594 H   0  0  0  0  0  0
    1.9115    0.4713    0.4473 H   0  0  0  0  0  0
    1.8708   -1.1894    0.0096 H   0  0  0  0  0  0
    1.8317   -0.5338   -4.8706 H   0  0  0  0  0  0
    3.4232    1.5937   -4.2252 H   0  0  0  0  0  0
  1  2  2  0  0  0
  1  6  1  0  0  0
  1 19  1  0  0  0
  2  3  1  0  0  0
  2  9  1  0  0  0
  3  4  2  0  0  0
  3  7  1  0  0  0
  4  5  1  0  0  0
  4 20  1  0  0  0
  5  6  2  0  0  0
  5 21  1  0  0  0
  6 22  1  0  0  0
  7  8  2  0  0  0
  7 39  1  0  0  0
  8  9  1  0  0  0
  8 10  1  0  0  0
  9 23  1  0  0  0
 10 11  1  0  0  0
 10 12  2  0  0  0
 11 13  1  0  0  0
 11 24  1  0  0  0
 13 18  1  0  0  0
 13 14  1  0  0  0
 13 25  1  0  0  0
 14 15  1  0  0  0
 14 26  1  0  0  0
 14 27  1  0  0  0
 15 16  1  0  0  0
 15 28  1  0  0  0
 15 29  1  0  0  0
 16 17  1  0  0  0
 16 30  1  0  0  0
 16 31  1  0  0  0
 17 18  1  0  0  0
 17 32  1  0  0  0
 17 33  1  0  0  0
 18 34  1  0  0  0
 18 35  1  0  0  0
 36 37  1  0  0  0
 36 44  1  0  0  0
 36 45  1  0  0  0
 36 46  1  0  0  0
 37 42  1  0  0  0
 37 38  2  0  0  0
 38 39  1  0  0  0
 38 40  1  0  0  0
 39 47  1  0  0  0
 39 48  1  0  0  0
 40 41  1  0  0  0
 40 43  1  0  0  0
 41 42  2  0  0  0
 41 49  1  0  0  0
 42 50  1  0  0  0
M  END
> <s_m_entry_id>
7989

> <s_m_entry_name>
entry

> <i_f3d_flags>
0

> <s_m_job_name>
adme_1000

> <r_psp_Prime_Energy>
-34118.3957991011

> <r_psp_Prime_Solv_GB>
-5191.09047175605

> <r_psp_Prime_Coulomb>
-26461.0307351992

> <r_psp_Prime_vdW>
-4061.00438849863

> <r_psp_Prime_Covalent>
4418.40409732811

> <i_psp_model_num>
0

> <r_psp_Prime_Lipo>
-2177.32416190457

> <s_psp_Prime_Energy_Force_Field>
S-OPLS

> <s_psp_Prime_Energy_Solvent_Model>
VSGB2.1

> <r_psp_Prime_Hbond>
-550.097605083181

> <r_psp_Prime_Packing>
-55.8446424272089

> <r_psp_Prime_SelfCont>
-40.4078915603482

> <r_psp_Memb1_x>
103.457542316003

> <r_psp_Memb1_y>
39.4731108300965

> <r_psp_Memb1_z>
48.7987221124676

> <r_psp_Memb2_x>
99.8134167309003

> <r_psp_Memb2_y>
2.81176945184187

> <r_psp_Memb2_z>
23.8404289603493

> <r_psp_MembDummyRadius>
4.45

> <r_psp_Prime_Bond_Covalent>
467.519560340443

> <r_psp_Prime_Bond_SGB>
49962.0313727772

> <r_psp_Prime_Angle_Covalent>
2228.3818894526

> <r_psp_Prime_Angle_SGB>
-21646.868929852

> <r_psp_Prime_Torsion_Covalent>
1722.50264753507

> <r_psp_Prime_NB14_LJ>
4238.01573474712

> <r_psp_Prime_NB14_Lipo>
0

> <r_psp_Prime_NB14_Elec>
25577.5758942707

> <r_psp_Prime_NB14_SGB>
-15622.5492627543

> <r_psp_Prime_NBShort_LJ>
-7883.97193888043

> <r_psp_Prime_NBShort_Lipo>
-2177.32416190457

> <r_psp_Prime_NBShort_Elec>
-53059.7903746943

> <r_psp_Prime_NBShort_SGB>
18015.9921642587

> <r_psp_Prime_NBLong_LJ>
-415.048184365313

> <r_psp_Prime_NBLong_Lipo>
0

> <r_psp_Prime_NBLong_Elec>
1021.18374522439

> <r_psp_Prime_NBLong_SGB>
-1163.42902268479

> <r_psp_Prime_Self_SGB>
-34736.2667935008

> <s_m_Source_Path>
F:\Dekstop_files\DAC4,5\Molecular Systems Desgn and Engineering\supplementary_str

> <s_m_Source_File>
1000_str.mae

> <i_m_Source_File_Index>
913

> <i_lp_mmshare_version>
53156

> <s_epik_input>
W2NIXTFbY0hdW2NIXVtjSF1jKGMxMiljKFtDSDJdYyhjM1tDSDNdKVtuSF1bY0hdW2NIXTMpYyhbbkhdMilDKD1PKVtOSF1bQ0hdNFtDSDJdW0NIMl1bQ0gyXVtDSDJdW0NIMl00

> <s_epik_cmdline>
J2VwaWtfcHl0aG9uJywgJy1waHQnLCAnMC4wJywgJy1waCcsICc3LjAnLCAnLXRuJywgJzgnLCAnLW1hJywgJzUwMCcsICctaW1hZScsICc8aW5maWxlLm1hZT4nLCAnLW9tYWUnLCAnPG91dGZpbGUubWFlPic=

> <r_lp_tautomer_probability>
1

> <r_epik_Ionization_Penalty>
  0.0000

> <r_epik_Ionization_Penalty_Charging>
  0.0000

> <r_epik_Ionization_Penalty_Neutral>
  0.0000

> <r_epik_State_Penalty>
  0.0000

> <r_epik_Charging_Adjusted_Penalty>
0

> <i_epik_Tot_Q>
0

> <i_epik_Tot_abs_Q>
0

> <s_lp_Force_Field>
S-OPLS

> <r_lp_Energy>
32.911426

> <b_lp_Chiralities_Consistent>
1

> <s_lp_Variant>
ind_1,25272-1

> <s_i_glide_gridfile>
glide-grid_mmpl3

> <i_i_glide_lignum>
559

> <i_i_glide_rotatable_bonds>
5

> <r_i_docking_score>
-8.26903525629347

> <r_i_glide_ligand_efficiency>
-0.330761410251739

> <r_i_glide_ligand_efficiency_sa>
-0.967152229654673

> <r_i_glide_ligand_efficiency_ln>
-1.96000915873171

> <r_i_glide_gscore>
-8.26903525629347

> <r_i_glide_evdw>
-42.525318145752

> <r_i_glide_ecoul>
-0.543124973773956

> <r_i_glide_energy>
-43.0684431195259

> <r_i_glide_einternal>
1.66625237464905

> <r_i_glide_emodel>
-61.5583466373364

> <i_i_glide_confnum>
52

> <i_i_glide_posenum>
314

> <r_i_glide_eff_state_penalty>
0

> <i_rge_num_r_groups>
1

> <r_rge_occupation_R1>
1

> <s_rge_R1>
25272

> <s_rge_R1_s_m_title>
25272

> <s_rge_R1_s_m_entry_id>
16382

> <s_rge_R1_s_m_entry_name>
eMol_BB_r-groups.230

> <s_rge_R1_s_m_smiles>
[*]Cc1c(C)cc[nH]1

> <b_rge_R1_b_sd_chiral_flag>
0

> <i_rge_R1_i_sd_version>
0

> <s_rge_R1_s_m_Source_File>
eMol_BB_r-groups-dedup.mae

> <i_rge_R1_i_m_Source_File_Index>
157

> <s_rge_R1_s_m_Source_Path>
/Users/konze/projects/pathfinder/r-groups

> <s_rge_R1_s_sd_Source_Path>
/Users/konze/projects/pathfinder/reactant sets/eMolecules

> <s_rge_R1_s_sd_Source_File>
eMol BB r-groups.mae

> <i_rge_R1_i_sd_Source_File_Index>
230

> <r_rge_R1_r_sd_MW>
95.1424

> <i_rge_R1_i_sd_RB>
0

> <i_rge_R1_i_sd_HeavyAtomCount>
7

> <i_rge_R1_i_sd_HBA>
0

> <i_rge_R1_i_sd_HBD>
1

> <r_rge_R1_r_sd_PSA>
15.79

> <i_rge_R1_i_sd_ChiralCenterCount>
0

> <i_rge_R1_i_sd_ChiralCenterCountAllPossible>
0

> <i_rge_R1_i_sd_RingCount>
1

> <r_rge_R1_r_sd_AlogP>
1.0396

> <s_rge_R1_s_sd_subgroup_title>
eMol BB r-groups

> <s_rge_R1_s_sd_subgroupid>
eMol BB r-groups

> <i_rge_R1_i_sd_subgroup_collapsed>
0

> <s_rge_R1_s_sd_Unique_SMILES_Stereo>
Cc1c(C)[nH]cc1

> <i_rge_R1_i_sd_canvasUID>
175

> <s_rge_R1_s_canvas_Unique_SMILES_Stereo>
Cc1c(C)[nH]cc1

> <s_psp_Prime_MMGBSA_Input_Structure_Hash>
9060f34040c36d54c084264833fcd75863b6fc05fb756bf632dc0a35

> <i_psp_number_heavy_atoms>
25

> <r_psp_MMGBSA_dG_Bind>
-39.1803060244056

> <r_psp_MMGBSA_dG_Bind_Coulomb>
5.3742589893227

> <r_psp_MMGBSA_dG_Bind_Covalent>
3.45844490629952

> <r_psp_MMGBSA_dG_Bind_Hbond>
-2.27373675443232e-013

> <r_psp_MMGBSA_dG_Bind_Lipo>
-24.7055199108531

> <r_psp_MMGBSA_dG_Bind_Packing>
4.9737991503207e-014

> <r_psp_MMGBSA_dG_Bind_SelfCont>
7.105427357601e-015

> <r_psp_MMGBSA_dG_Bind_Solv_GB>
24.8315729054066

> <r_psp_MMGBSA_dG_Bind_vdW>
-48.1390629144926

> <r_psp_Lig_Strain_Energy>
5.82758829229932

> <r_psp_Lig_Strain_Coulomb>
0.734189466595531

> <r_psp_Lig_Strain_Covalent>
3.4586457744126

> <r_psp_Lig_Strain_Hbond>
0

> <r_psp_Lig_Strain_Lipo>
-0.0113384235327367

> <r_psp_Lig_Strain_Packing>
0

> <r_psp_Lig_Strain_SelfCont>
0

> <r_psp_Lig_Strain_Solv_GB>
0.334595627607527

> <r_psp_Lig_Strain_vdW>
1.31149584721641

> <r_psp_Ligand_Energy>
16.0355476571373

> <r_psp_Ligand_Coulomb>
-7.48918024551291

> <r_psp_Ligand_Covalent>
24.5391266003966

> <r_psp_Ligand_Hbond>
0

> <r_psp_Ligand_Lipo>
-2.09400965623613

> <r_psp_Ligand_Packing>
0

> <r_psp_Ligand_SelfCont>
0

> <r_psp_Ligand_Solv_GB>
-9.3702642988648

> <r_psp_Ligand_vdW>
10.4498752573545

> <r_psp_Complex_Energy>
-34118.3957991011

> <r_psp_Complex_Coulomb>
-26461.0307351992

> <r_psp_Complex_Covalent>
4418.40409732811

> <r_psp_Complex_Hbond>
-550.097605083181

> <r_psp_Complex_Lipo>
-2177.32416190457

> <r_psp_Complex_Packing>
-55.8446424272089

> <r_psp_Complex_SelfCont>
-40.4078915603482

> <r_psp_Complex_Solv_GB>
-5191.09047175605

> <r_psp_Complex_vdW>
-4061.00438849863

> <r_psp_Receptor_Energy>
-34095.2510407338

> <r_psp_Receptor_Coulomb>
-26458.915813943

> <r_psp_Receptor_Covalent>
4390.40652582141

> <r_psp_Receptor_Hbond>
-550.097605083181

> <r_psp_Receptor_Lipo>
-2150.52463233748

> <r_psp_Receptor_Packing>
-55.8446424272089

> <r_psp_Receptor_SelfCont>
-40.4078915603482

> <r_psp_Receptor_Solv_GB>
-5206.55178036259

> <r_psp_Receptor_vdW>
-4023.31520084149

> <r_psp_MMGBSA_dG_Bind(NS)>
-45.0078943166591

> <r_psp_MMGBSA_dG_Bind(NS)_Coulomb>
4.64006952268755

> <r_psp_MMGBSA_dG_Bind(NS)_Covalent>
-0.000200868112187891

> <r_psp_MMGBSA_dG_Bind(NS)_Hbond>
0

> <r_psp_MMGBSA_dG_Bind(NS)_Lipo>
-24.6941814873157

> <r_psp_MMGBSA_dG_Bind(NS)_Packing>
0

> <r_psp_MMGBSA_dG_Bind(NS)_SelfCont>
0

> <r_psp_MMGBSA_dG_Bind(NS)_Solv_GB>
24.4969772778013

> <r_psp_MMGBSA_dG_Bind(NS)_vdW>
-49.4505587617136

> <r_psp_Rec_Strain_Energy>
-5.0931703299284e-011

> <r_psp_Rec_Strain_Coulomb>
4.00177668780088e-011

> <r_psp_Rec_Strain_Covalent>
-9.09494701772928e-013

> <r_psp_Rec_Strain_Hbond>
-2.27373675443232e-013

> <r_psp_Rec_Strain_Lipo>
-5.00222085975111e-012

> <r_psp_Rec_Strain_Packing>
4.9737991503207e-014

> <r_psp_Rec_Strain_SelfCont>
7.105427357601e-015

> <r_psp_Rec_Strain_Solv_GB>
-1.81898940354586e-012

> <r_psp_Rec_Strain_vdW>
4.54747350886464e-012

> <r_psp_Prime_MMGBSA_ligand_efficiency>
-1.56721224097622

> <r_psp_Prime_MMGBSA_ligand_efficiency_sa>
-2.35081836146434

> <r_psp_Prime_MMGBSA_ligand_efficiency_ln>
-9.28690666680847

> <r_i_glide_lipo>
-4.49698655663661

> <r_i_glide_hbond>
0

> <r_i_glide_metal>
0

> <r_i_glide_rewards>
-2.40297559049825

> <r_i_glide_erotb>
0.838661544195077

> <r_i_glide_esite>
0

> <i_psp_ExecuteFunction_Internal_Entry_Index>
1454

> <i_qp_#stars>
0

> <i_qp_#amine>
0

> <i_qp_#amidine>
0

> <i_qp_#acid>
0

> <i_qp_#amide>
0

> <i_qp_#rotor>
4

> <i_qp_#rtvFG>
0

> <i_qp_CNS>
-1

> <r_qp_mol_MW>
   335.448

> <r_qp_dipole>
     8.643

> <r_qp_SASA>
   651.388

> <r_qp_FOSA>
   340.541

> <r_qp_FISA>
    54.963

> <r_qp_PISA>
   255.884

> <r_qp_WPSA>
     0.000

> <r_qp_volume>
  1145.017

> <r_qp_donorHB>
     3.000

> <r_qp_accptHB>
     2.500

> <r_qp_dip^2/V>
   0.0652390

> <r_qp_ACxDN^.5/SA>
   0.0066475

> <r_qp_glob>
   0.8125806

> <r_qp_QPpolrz>
    39.545

> <r_qp_QPlogPC16>
    11.720

> <r_qp_QPlogPoct>
    19.230

> <r_qp_QPlogPw>
     9.375

> <r_qp_QPlogPo/w>
     4.862

> <r_qp_QPlogS>
    -6.060

> <r_qp_CIQPlogS>
    -5.546

> <r_qp_QPlogHERG>
    -5.785

> <r_qp_QPPCaco>
  2983.209

> <r_qp_QPlogBB>
    -0.233

> <r_qp_QPPMDCK>
  1612.229

> <r_qp_QPlogKp>
    -1.247

> <r_qp_IP(eV)>
     8.334

> <r_qp_EA(eV)>
     0.516

> <i_qp_#metab>
2

> <r_qp_QPlogKhsa>
     0.837

> <i_qp_HumanOralAbsorption>
3

> <r_qp_PercentHumanOralAbsorption>
   100.000

> <r_qp_SAfluorine>
     0.000

> <r_qp_SAamideO>
     0.000

> <r_qp_PSA>
    61.576

> <i_qp_#NandO>
4

> <i_qp_RuleOfFive>
0

> <i_qp_RuleOfThree>
1

> <i_qp_#ringatoms>
20

> <i_qp_#in34>
0

> <i_qp_#in56>
20

> <i_qp_#noncon>
6

> <i_qp_#nonHatm>
25

> <r_qp_Jm>
0.0165235527452468

> <s_m_subgroupid>
1000_str-imp1->adme_1000-out12

> <s_m_subgroup_title>
1000_str->adme_1000-out1

> <b_m_subgroup_collapsed>
0

$$$$
ind_1,25272
                    3D
 Structure written by MMmdl.
 50 53  0  0  1  0            999 V2000
   -3.3143   -1.7247    0.1116 C   0  0  0  0  0  0
   -2.2587   -0.8093    0.0346 C   0  0  0  0  0  0
   -0.8927   -1.2120    0.0255 C   0  0  0  0  0  0
   -0.6025   -2.5863    0.1020 C   0  0  0  0  0  0
   -1.6511   -3.5010    0.1806 C   0  0  0  0  0  0
   -2.9764   -3.0759    0.1848 C   0  0  0  0  0  0
   -0.0905   -0.0162   -0.0630 C   0  0  0  0  0  0
   -0.9771    1.0689   -0.0904 C   0  0  0  0  0  0
   -2.2600    0.5632   -0.0485 N   0  0  0  0  0  0
   -0.6970    2.4805   -0.2529 C   0  0  0  0  0  0
   -1.6332    3.3050    0.2592 N   0  0  0  0  0  0
    0.3327    2.8744   -0.8022 O   0  0  0  0  0  0
   -1.5906    4.7687    0.2296 C   0  0  0  0  0  0
   -1.7739    5.4034   -1.1750 C   0  0  0  0  0  0
   -1.7677    6.9450   -1.1618 C   0  0  0  0  0  0
   -2.7454    7.5250   -0.1271 C   0  0  0  0  0  0
   -2.4694    6.9634    1.2768 C   0  0  0  0  0  0
   -2.4931    5.4224    1.3038 C   0  0  0  0  0  0
   -4.3472   -1.4088    0.1168 H   0  0  0  0  0  0
    0.4188   -2.9373    0.1037 H   0  0  0  0  0  0
   -1.4322   -4.5571    0.2402 H   0  0  0  0  0  0
   -3.7640   -3.8126    0.2475 H   0  0  0  0  0  0
   -3.0702    1.1645   -0.0844 H   0  0  0  0  0  0
   -2.4746    2.8965    0.6381 H   0  0  0  0  0  0
   -0.5771    5.0452    0.5326 H   0  0  0  0  0  0
   -0.9985    5.0525   -1.8571 H   0  0  0  0  0  0
   -2.7287    5.0743   -1.5879 H   0  0  0  0  0  0
   -0.7590    7.2988   -0.9422 H   0  0  0  0  0  0
   -2.0106    7.3247   -2.1549 H   0  0  0  0  0  0
   -2.6697    8.6130   -0.1133 H   0  0  0  0  0  0
   -3.7702    7.2930   -0.4206 H   0  0  0  0  0  0
   -1.4959    7.3149    1.6219 H   0  0  0  0  0  0
   -3.2005    7.3572    1.9839 H   0  0  0  0  0  0
   -3.5233    5.1011    1.1420 H   0  0  0  0  0  0
   -2.2067    5.0761    2.2982 H   0  0  0  0  0  0
    4.8790    1.1217    0.6386 C   0  0  0  0  0  0
    3.5958    0.4934    0.1459 C   0  0  0  0  0  0
    3.4586   -0.6305   -0.6693 C   0  0  0  0  0  0
    4.4772   -1.5156   -1.3502 C   0  0  0  0  0  0
    2.1170   -0.8766   -0.8174 N   0  0  0  0  0  0
    1.3701    0.0193   -0.1003 C   0  0  0  0  0  0
    2.2910    0.8529    0.5169 C   0  0  0  0  0  0
    1.7311   -1.6269   -1.3720 H   0  0  0  0  0  0
    5.6676    0.3804    0.7683 H   0  0  0  0  0  0
    4.7505    1.5958    1.6119 H   0  0  0  0  0  0
    5.2531    1.8749   -0.0547 H   0  0  0  0  0  0
    5.4989   -1.1855   -1.1629 H   0  0  0  0  0  0
    4.3399   -1.5278   -2.4317 H   0  0  0  0  0  0
    4.4066   -2.5477   -1.0058 H   0  0  0  0  0  0
    2.0393    1.6696    1.1775 H   0  0  0  0  0  0
  1  2  2  0  0  0
  1  6  1  0  0  0
  1 19  1  0  0  0
  2  3  1  0  0  0
  2  9  1  0  0  0
  3  4  2  0  0  0
  3  7  1  0  0  0
  4  5  1  0  0  0
  4 20  1  0  0  0
  5  6  2  0  0  0
  5 21  1  0  0  0
  6 22  1  0  0  0
  7  8  2  0  0  0
  7 41  1  0  0  0
  8  9  1  0  0  0
  8 10  1  0  0  0
  9 23  1  0  0  0
 10 11  1  0  0  0
 10 12  2  0  0  0
 11 13  1  0  0  0
 11 24  1  0  0  0
 13 18  1  0  0  0
 13 14  1  0  0  0
 13 25  1  0  0  0
 14 15  1  0  0  0
 14 26  1  0  0  0
 14 27  1  0  0  0
 15 16  1  0  0  0
 15 28  1  0  0  0
 15 29  1  0  0  0
 16 17  1  0  0  0
 16 30  1  0  0  0
 16 31  1  0  0  0
 17 18  1  0  0  0
 17 32  1  0  0  0
 17 33  1  0  0  0
 18 34  1  0  0  0
 18 35  1  0  0  0
 36 37  1  0  0  0
 36 44  1  0  0  0
 36 45  1  0  0  0
 36 46  1  0  0  0
 37 42  1  0  0  0
 37 38  2  0  0  0
 38 39  1  0  0  0
 38 40  1  0  0  0
 39 47  1  0  0  0
 39 48  1  0  0  0
 39 49  1  0  0  0
 40 41  1  0  0  0
 40 43  1  0  0  0
 41 42  2  0  0  0
 42 50  1  0  0  0
M  END
> <s_m_entry_id>
8004

> <s_m_entry_name>
entry

> <i_f3d_flags>
0

> <s_m_job_name>
adme_1000

> <r_psp_Prime_Energy>
-34125.7512530948

> <r_psp_Prime_Solv_GB>
-5187.76936352762

> <r_psp_Prime_Coulomb>
-26475.8306877094

> <r_psp_Prime_vdW>
-4058.72759879012

> <r_psp_Prime_Covalent>
4420.34665353706

> <i_psp_model_num>
0

> <r_psp_Prime_Lipo>
-2177.4181119906

> <s_psp_Prime_Energy_Force_Field>
S-OPLS

> <s_psp_Prime_Energy_Solvent_Model>
VSGB2.1

> <r_psp_Prime_Hbond>
-550.099610626517

> <r_psp_Prime_Packing>
-55.8446424272089

> <r_psp_Prime_SelfCont>
-40.4078915603482

> <r_psp_Memb1_x>
103.457542316003

> <r_psp_Memb1_y>
39.4731108300965

> <r_psp_Memb1_z>
48.7987221124676

> <r_psp_Memb2_x>
99.8134167309003

> <r_psp_Memb2_y>
2.81176945184187

> <r_psp_Memb2_z>
23.8404289603493

> <r_psp_MembDummyRadius>
4.45

> <r_psp_Prime_Bond_Covalent>
468.115183399376

> <r_psp_Prime_Bond_SGB>
49963.2455866379

> <r_psp_Prime_Angle_Covalent>
2226.67615609618

> <r_psp_Prime_Angle_SGB>
-21649.6287362124

> <r_psp_Prime_Torsion_Covalent>
1725.5553140415

> <r_psp_Prime_NB14_LJ>
4238.12143243756

> <r_psp_Prime_NB14_Lipo>
0

> <r_psp_Prime_NB14_Elec>
25557.7682339936

> <r_psp_Prime_NB14_SGB>
-15620.8382532515

> <r_psp_Prime_NBShort_LJ>
-7881.80360428277

> <r_psp_Prime_NBShort_Lipo>
-2177.4181119906

> <r_psp_Prime_NBShort_Elec>
-53049.5360331404

> <r_psp_Prime_NBShort_SGB>
18018.7881744548

> <r_psp_Prime_NBLong_LJ>
-415.045426944903

> <r_psp_Prime_NBLong_Lipo>
0

> <r_psp_Prime_NBLong_Elec>
1015.93711143738

> <r_psp_Prime_NBLong_SGB>
-1162.12547539929

> <r_psp_Prime_Self_SGB>
-34737.2106597571

> <s_m_Source_Path>
F:\Dekstop_files\DAC4,5\Molecular Systems Desgn and Engineering\supplementary_str

> <s_m_Source_File>
1000_str.mae

> <i_m_Source_File_Index>
928

> <i_lp_mmshare_version>
53156

> <s_epik_input>
W2NIXTFbY0hdW2NIXVtjSF1jKGMxMiljKC1jKFtjSF0zKVtuSF1jKFtDSDNdKWMzW0NIM10pYyhbbkhdMilDKD1PKVtOSF1bQ0hdNFtDSDJdW0NIMl1bQ0gyXVtDSDJdW0NIMl00

> <s_epik_cmdline>
J2VwaWtfcHl0aG9uJywgJy1waHQnLCAnMC4wJywgJy1waCcsICc3LjAnLCAnLXRuJywgJzgnLCAnLW1hJywgJzUwMCcsICctaW1hZScsICc8aW5maWxlLm1hZT4nLCAnLW9tYWUnLCAnPG91dGZpbGUubWFlPic=

> <r_lp_tautomer_probability>
1

> <r_epik_Ionization_Penalty>
  0.0000

> <r_epik_Ionization_Penalty_Charging>
  0.0000

> <r_epik_Ionization_Penalty_Neutral>
  0.0000

> <r_epik_State_Penalty>
  0.0000

> <r_epik_Charging_Adjusted_Penalty>
0

> <i_epik_Tot_Q>
0

> <i_epik_Tot_abs_Q>
0

> <s_lp_Force_Field>
S-OPLS

> <r_lp_Energy>
30.47783

> <b_lp_Chiralities_Consistent>
1

> <s_lp_Variant>
ind_1,25272-1

> <s_i_glide_gridfile>
glide-grid_mmpl3

> <i_i_glide_lignum>
561

> <i_i_glide_rotatable_bonds>
4

> <r_i_docking_score>
-8.83678939923709

> <r_i_glide_ligand_efficiency>
-0.353471575969484

> <r_i_glide_ligand_efficiency_sa>
-1.03355715697986

> <r_i_glide_ligand_efficiency_ln>
-2.09458390482805

> <r_i_glide_gscore>
-8.83678939923709

> <r_i_glide_evdw>
-38.4603042602539

> <r_i_glide_ecoul>
-0.968554139137268

> <r_i_glide_energy>
-39.4288583993912

> <r_i_glide_einternal>
0.979997396469116

> <r_i_glide_emodel>
-56.4741373660041

> <i_i_glide_confnum>
5

> <i_i_glide_posenum>
330

> <r_i_glide_eff_state_penalty>
0

> <i_rge_num_r_groups>
1

> <r_rge_occupation_R1>
1

> <s_rge_R1>
25272

> <s_rge_R1_s_m_title>
25272

> <s_rge_R1_s_m_entry_id>
16384

> <s_rge_R1_s_m_entry_name>
eMol_BB_r-groups.230

> <s_rge_R1_s_m_smiles>
[*]c(c1)[nH]c(C)c1C

> <b_rge_R1_b_sd_chiral_flag>
0

> <i_rge_R1_i_sd_version>
0

> <s_rge_R1_s_m_Source_File>
eMol_BB_r-groups-dedup.mae

> <i_rge_R1_i_m_Source_File_Index>
157

> <s_rge_R1_s_m_Source_Path>
/Users/konze/projects/pathfinder/r-groups

> <s_rge_R1_s_sd_Source_Path>
/Users/konze/projects/pathfinder/reactant sets/eMolecules

> <s_rge_R1_s_sd_Source_File>
eMol BB r-groups.mae

> <i_rge_R1_i_sd_Source_File_Index>
230

> <r_rge_R1_r_sd_MW>
95.1424

> <i_rge_R1_i_sd_RB>
0

> <i_rge_R1_i_sd_HeavyAtomCount>
7

> <i_rge_R1_i_sd_HBA>
0

> <i_rge_R1_i_sd_HBD>
1

> <r_rge_R1_r_sd_PSA>
15.79

> <i_rge_R1_i_sd_ChiralCenterCount>
0

> <i_rge_R1_i_sd_ChiralCenterCountAllPossible>
0

> <i_rge_R1_i_sd_RingCount>
1

> <r_rge_R1_r_sd_AlogP>
1.0396

> <s_rge_R1_s_sd_subgroup_title>
eMol BB r-groups

> <s_rge_R1_s_sd_subgroupid>
eMol BB r-groups

> <i_rge_R1_i_sd_subgroup_collapsed>
0

> <s_rge_R1_s_sd_Unique_SMILES_Stereo>
Cc1c(C)[nH]cc1

> <i_rge_R1_i_sd_canvasUID>
175

> <s_rge_R1_s_canvas_Unique_SMILES_Stereo>
Cc1c(C)[nH]cc1

> <s_psp_Prime_MMGBSA_Input_Structure_Hash>
0576c080738f998537ebdc97d74b6a01862b7f0337a1f01fb72a3ba1

> <i_psp_number_heavy_atoms>
25

> <r_psp_MMGBSA_dG_Bind>
-40.5629404241918

> <r_psp_MMGBSA_dG_Bind_Coulomb>
-4.72180130058769

> <r_psp_MMGBSA_dG_Bind_Covalent>
6.03033400512504

> <r_psp_MMGBSA_dG_Bind_Hbond>
-0.0020055433357129

> <r_psp_MMGBSA_dG_Bind_Lipo>
-25.5405959056975

> <r_psp_MMGBSA_dG_Bind_Packing>
4.9737991503207e-014

> <r_psp_MMGBSA_dG_Bind_SelfCont>
7.105427357601e-015

> <r_psp_MMGBSA_dG_Bind_Solv_GB>
28.8979260605147

> <r_psp_MMGBSA_dG_Bind_vdW>
-45.2267977401111

> <r_psp_Lig_Strain_Energy>
10.1022988307664

> <r_psp_Lig_Strain_Coulomb>
0.529693390757433

> <r_psp_Lig_Strain_Covalent>
6.03053487323704

> <r_psp_Lig_Strain_Hbond>
0

> <r_psp_Lig_Strain_Lipo>
0.0886073212780902

> <r_psp_Lig_Strain_Packing>
0

> <r_psp_Lig_Strain_SelfCont>
0

> <r_psp_Lig_Strain_Solv_GB>
-0.575058730900111

> <r_psp_Lig_Strain_vdW>
4.0285219763939

> <r_psp_Ligand_Energy>
10.0627280632002

> <r_psp_Ligand_Coulomb>
-12.1930724658318

> <r_psp_Ligand_Covalent>
23.9097937105215

> <r_psp_Ligand_Hbond>
0

> <r_psp_Ligand_Lipo>
-1.35288374742317

> <r_psp_Ligand_Packing>
0

> <r_psp_Ligand_SelfCont>
0

> <r_psp_Ligand_Solv_GB>
-10.1155092255474

> <r_psp_Ligand_vdW>
9.81439979148102

> <r_psp_Complex_Energy>
-34125.7512530948

> <r_psp_Complex_Coulomb>
-26475.8306877094

> <r_psp_Complex_Covalent>
4420.34665353706

> <r_psp_Complex_Hbond>
-550.099610626517

> <r_psp_Complex_Lipo>
-2177.4181119906

> <r_psp_Complex_Packing>
-55.8446424272089

> <r_psp_Complex_SelfCont>
-40.4078915603482

> <r_psp_Complex_Solv_GB>
-5187.76936352762

> <r_psp_Complex_vdW>
-4058.72759879012

> <r_psp_Receptor_Energy>
-34095.2510407338

> <r_psp_Receptor_Coulomb>
-26458.915813943

> <r_psp_Receptor_Covalent>
4390.40652582141

> <r_psp_Receptor_Hbond>
-550.097605083181

> <r_psp_Receptor_Lipo>
-2150.52463233748

> <r_psp_Receptor_Packing>
-55.8446424272089

> <r_psp_Receptor_SelfCont>
-40.4078915603482

> <r_psp_Receptor_Solv_GB>
-5206.55178036259

> <r_psp_Receptor_vdW>
-4023.31520084149

> <r_psp_MMGBSA_dG_Bind(NS)>
-50.6652392549004

> <r_psp_MMGBSA_dG_Bind(NS)_Coulomb>
-5.25149469138341

> <r_psp_MMGBSA_dG_Bind(NS)_Covalent>
-0.000200868111278396

> <r_psp_MMGBSA_dG_Bind(NS)_Hbond>
-0.00200554333548553

> <r_psp_MMGBSA_dG_Bind(NS)_Lipo>
-25.6292032269707

> <r_psp_MMGBSA_dG_Bind(NS)_Packing>
0

> <r_psp_MMGBSA_dG_Bind(NS)_SelfCont>
0

> <r_psp_MMGBSA_dG_Bind(NS)_Solv_GB>
29.4729847914168

> <r_psp_MMGBSA_dG_Bind(NS)_vdW>
-49.2553197165098

> <r_psp_Rec_Strain_Energy>
-5.0931703299284e-011

> <r_psp_Rec_Strain_Coulomb>
4.00177668780088e-011

> <r_psp_Rec_Strain_Covalent>
-9.09494701772928e-013

> <r_psp_Rec_Strain_Hbond>
-2.27373675443232e-013

> <r_psp_Rec_Strain_Lipo>
-5.00222085975111e-012

> <r_psp_Rec_Strain_Packing>
4.9737991503207e-014

> <r_psp_Rec_Strain_SelfCont>
7.105427357601e-015

> <r_psp_Rec_Strain_Solv_GB>
-1.81898940354586e-012

> <r_psp_Rec_Strain_vdW>
4.54747350886464e-012

> <r_psp_Prime_MMGBSA_ligand_efficiency>
-1.62251761696767

> <r_psp_Prime_MMGBSA_ligand_efficiency_sa>
-2.43377642545151

> <r_psp_Prime_MMGBSA_ligand_efficiency_ln>
-9.61463245376722

> <r_i_glide_lipo>
-5.50988170394407

> <r_i_glide_hbond>
0

> <r_i_glide_metal>
0

> <r_i_glide_rewards>
-1.9295385967658

> <r_i_glide_erotb>
0.670929235356062

> <r_i_glide_esite>
0

> <i_psp_ExecuteFunction_Internal_Entry_Index>
511

> <i_qp_#stars>
2

> <i_qp_#amine>
0

> <i_qp_#amidine>
0

> <i_qp_#acid>
0

> <i_qp_#amide>
0

> <i_qp_#rotor>
2

> <i_qp_#rtvFG>
0

> <i_qp_CNS>
-1

> <r_qp_mol_MW>
   335.448

> <r_qp_dipole>
     6.465

> <r_qp_SASA>
   672.705

> <r_qp_FOSA>
   405.713

> <r_qp_FISA>
    56.237

> <r_qp_PISA>
   210.756

> <r_qp_WPSA>
     0.000

> <r_qp_volume>
  1164.148

> <r_qp_donorHB>
     3.000

> <r_qp_accptHB>
     2.500

> <r_qp_dip^2/V>
   0.0359079

> <r_qp_ACxDN^.5/SA>
   0.0064369

> <r_qp_glob>
   0.7955716

> <r_qp_QPpolrz>
    41.164

> <r_qp_QPlogPC16>
    11.611

> <r_qp_QPlogPoct>
    19.330

> <r_qp_QPlogPw>
     9.570

> <r_qp_QPlogPo/w>
     4.916

> <r_qp_QPlogS>
    -6.746

> <r_qp_CIQPlogS>
    -5.546

> <r_qp_QPlogHERG>
    -5.845

> <r_qp_QPPCaco>
  2901.390

> <r_qp_QPlogBB>
    -0.149

> <r_qp_QPPMDCK>
  1564.489

> <r_qp_QPlogKp>
    -1.621

> <r_qp_IP(eV)>
     7.878

> <r_qp_EA(eV)>
     0.507

> <i_qp_#metab>
3

> <r_qp_QPlogKhsa>
     0.968

> <i_qp_HumanOralAbsorption>
1

> <r_qp_PercentHumanOralAbsorption>
   100.000

> <r_qp_SAfluorine>
     0.000

> <r_qp_SAamideO>
     0.000

> <r_qp_PSA>
    58.939

> <i_qp_#NandO>
4

> <i_qp_RuleOfFive>
0

> <i_qp_RuleOfThree>
1

> <i_qp_#ringatoms>
20

> <i_qp_#in34>
0

> <i_qp_#in56>
20

> <i_qp_#noncon>
6

> <i_qp_#nonHatm>
25

> <r_qp_Jm>
0.00136501511919956

> <s_m_subgroupid>
1000_str-imp1->adme_1000-out12

> <s_m_subgroup_title>
1000_str->adme_1000-out1

> <b_m_subgroup_collapsed>
0

$$$$
ind_1,25272
                    3D
 Structure written by MMmdl.
 50 53  0  0  1  0            999 V2000
   -3.2963   -1.7800    0.3605 C   0  0  0  0  0  0
   -2.2344   -0.8720    0.2817 C   0  0  0  0  0  0
   -0.8756   -1.2943    0.2278 C   0  0  0  0  0  0
   -0.5922   -2.6702    0.2548 C   0  0  0  0  0  0
   -1.6491   -3.5753    0.3332 C   0  0  0  0  0  0
   -2.9698   -3.1365    0.3848 C   0  0  0  0  0  0
   -0.0872   -0.0980    0.1537 C   0  0  0  0  0  0
   -0.9367    1.0108    0.1634 C   0  0  0  0  0  0
   -2.2226    0.5074    0.2336 N   0  0  0  0  0  0
   -0.6215    2.4219    0.0499 C   0  0  0  0  0  0
   -1.6434    3.2595    0.3206 N   0  0  0  0  0  0
    0.5090    2.8042   -0.2554 O   0  0  0  0  0  0
   -1.5881    4.7220    0.2692 C   0  0  0  0  0  0
   -1.4228    5.3238   -1.1522 C   0  0  0  0  0  0
   -1.4206    6.8652   -1.1755 C   0  0  0  0  0  0
   -2.6218    7.4633   -0.4257 C   0  0  0  0  0  0
   -2.6958    6.9369    1.0165 C   0  0  0  0  0  0
   -2.7238    5.3969    1.0759 C   0  0  0  0  0  0
   -4.3256   -1.4553    0.3997 H   0  0  0  0  0  0
    0.4274   -3.0248    0.2149 H   0  0  0  0  0  0
   -1.4405   -4.6350    0.3540 H   0  0  0  0  0  0
   -3.7633   -3.8671    0.4445 H   0  0  0  0  0  0
   -3.0297    1.1136    0.2395 H   0  0  0  0  0  0
   -2.5542    2.8614    0.4944 H   0  0  0  0  0  0
   -0.6784    5.0074    0.8039 H   0  0  0  0  0  0
   -0.5047    4.9622   -1.6168 H   0  0  0  0  0  0
   -2.2480    4.9802   -1.7779 H   0  0  0  0  0  0
   -0.4963    7.2308   -0.7253 H   0  0  0  0  0  0
   -1.4141    7.2192   -2.2070 H   0  0  0  0  0  0
   -2.5521    8.5518   -0.4206 H   0  0  0  0  0  0
   -3.5442    7.2186   -0.9548 H   0  0  0  0  0  0
   -1.8360    7.3038    1.5792 H   0  0  0  0  0  0
   -3.5775    7.3424    1.5144 H   0  0  0  0  0  0
   -3.6843    5.0660    0.6773 H   0  0  0  0  0  0
   -2.6873    5.0772    2.1186 H   0  0  0  0  0  0
    4.5916   -0.5623   -1.6023 C   0  0  0  0  0  0
    3.3977   -0.2620   -0.7252 C   0  0  0  0  0  0
    2.0458   -0.4183   -1.0517 C   0  0  0  0  0  0
    1.3985   -0.8483   -2.3554 C   0  0  0  0  0  0
    1.2869   -0.0880    0.0576 N   0  0  0  0  0  0
    2.1365    0.2504    1.0786 C   0  0  0  0  0  0
    3.4314    0.1236    0.6210 C   0  0  0  0  0  0
    4.4014   -1.4090   -2.2622 H   0  0  0  0  0  0
    5.4712   -0.8313   -1.0167 H   0  0  0  0  0  0
    4.8519    0.2852   -2.2363 H   0  0  0  0  0  0
    2.1267   -0.9621   -3.1582 H   0  0  0  0  0  0
    0.6624   -0.1206   -2.6990 H   0  0  0  0  0  0
    0.8837   -1.8036   -2.2545 H   0  0  0  0  0  0
    1.7472    0.5379    2.0446 H   0  0  0  0  0  0
    4.3238    0.3024    1.2024 H   0  0  0  0  0  0
  1  2  2  0  0  0
  1  6  1  0  0  0
  1 19  1  0  0  0
  2  3  1  0  0  0
  2  9  1  0  0  0
  3  4  2  0  0  0
  3  7  1  0  0  0
  4  5  1  0  0  0
  4 20  1  0  0  0
  5  6  2  0  0  0
  5 21  1  0  0  0
  6 22  1  0  0  0
  7  8  2  0  0  0
  7 40  1  0  0  0
  8  9  1  0  0  0
  8 10  1  0  0  0
  9 23  1  0  0  0
 10 11  1  0  0  0
 10 12  2  0  0  0
 11 13  1  0  0  0
 11 24  1  0  0  0
 13 18  1  0  0  0
 13 14  1  0  0  0
 13 25  1  0  0  0
 14 15  1  0  0  0
 14 26  1  0  0  0
 14 27  1  0  0  0
 15 16  1  0  0  0
 15 28  1  0  0  0
 15 29  1  0  0  0
 16 17  1  0  0  0
 16 30  1  0  0  0
 16 31  1  0  0  0
 17 18  1  0  0  0
 17 32  1  0  0  0
 17 33  1  0  0  0
 18 34  1  0  0  0
 18 35  1  0  0  0
 36 37  1  0  0  0
 36 43  1  0  0  0
 36 44  1  0  0  0
 36 45  1  0  0  0
 37 42  1  0  0  0
 37 38  2  0  0  0
 38 39  1  0  0  0
 38 40  1  0  0  0
 39 46  1  0  0  0
 39 47  1  0  0  0
 39 48  1  0  0  0
 40 41  1  0  0  0
 41 42  2  0  0  0
 41 49  1  0  0  0
 42 50  1  0  0  0
M  END
> <s_m_entry_id>
8052

> <s_m_entry_name>
entry

> <i_f3d_flags>
0

> <s_m_job_name>
adme_1000

> <r_psp_Prime_Energy>
-34141.0282320906

> <r_psp_Prime_Solv_GB>
-5194.07562892878

> <r_psp_Prime_Coulomb>
-26484.1837671828

> <r_psp_Prime_vdW>
-4052.6323950528

> <r_psp_Prime_Covalent>
4413.97552578627

> <i_psp_model_num>
0

> <r_psp_Prime_Lipo>
-2177.75318991267

> <s_psp_Prime_Energy_Force_Field>
S-OPLS

> <s_psp_Prime_Energy_Solvent_Model>
VSGB2.1

> <r_psp_Prime_Hbond>
-550.106206204025

> <r_psp_Prime_Packing>
-55.8446790354243

> <r_psp_Prime_SelfCont>
-40.4078915603482

> <r_psp_Memb1_x>
103.457542316003

> <r_psp_Memb1_y>
39.4731108300965

> <r_psp_Memb1_z>
48.7987221124676

> <r_psp_Memb2_x>
99.8134167309003

> <r_psp_Memb2_y>
2.81176945184187

> <r_psp_Memb2_z>
23.8404289603493

> <r_psp_MembDummyRadius>
4.45

> <r_psp_Prime_Bond_Covalent>
467.369095721967

> <r_psp_Prime_Bond_SGB>
49974.703498108

> <r_psp_Prime_Angle_Covalent>
2227.34067250068

> <r_psp_Prime_Angle_SGB>
-21655.6041120348

> <r_psp_Prime_Torsion_Covalent>
1719.26575756362

> <r_psp_Prime_NB14_LJ>
4237.64219376204

> <r_psp_Prime_NB14_Lipo>
0

> <r_psp_Prime_NB14_Elec>
25590.8054409657

> <r_psp_Prime_NB14_SGB>
-15631.9902777963

> <r_psp_Prime_NBShort_LJ>
-7875.17751763353

> <r_psp_Prime_NBShort_Lipo>
-2177.75318991267

> <r_psp_Prime_NBShort_Elec>
-53092.3966586094

> <r_psp_Prime_NBShort_SGB>
18030.4909419277

> <r_psp_Prime_NBLong_LJ>
-415.097071181311

> <r_psp_Prime_NBLong_Lipo>
0

> <r_psp_Prime_NBLong_Elec>
1017.40745046079

> <r_psp_Prime_NBLong_SGB>
-1169.23249398989

> <r_psp_Prime_Self_SGB>
-34742.4431851434

> <s_m_Source_Path>
F:\Dekstop_files\DAC4,5\Molecular Systems Desgn and Engineering\supplementary_str

> <s_m_Source_File>
1000_str.mae

> <i_m_Source_File_Index>
976

> <i_lp_mmshare_version>
53156

> <s_epik_input>
W2NIXTFbY0hdW2NIXVtjSF1jKGMxMiljKC1uKFtjSF1bY0hdMyljKFtDSDNdKWMzW0NIM10pYyhbbkhdMilDKD1PKVtOSF1bQ0hdNFtDSDJdW0NIMl1bQ0gyXVtDSDJdW0NIMl00

> <s_epik_cmdline>
J2VwaWtfcHl0aG9uJywgJy1waHQnLCAnMC4wJywgJy1waCcsICc3LjAnLCAnLXRuJywgJzgnLCAnLW1hJywgJzUwMCcsICctaW1hZScsICc8aW5maWxlLm1hZT4nLCAnLW9tYWUnLCAnPG91dGZpbGUubWFlPic=

> <r_lp_tautomer_probability>
1

> <r_epik_Ionization_Penalty>
  0.0000

> <r_epik_Ionization_Penalty_Charging>
  0.0000

> <r_epik_Ionization_Penalty_Neutral>
  0.0000

> <r_epik_State_Penalty>
  0.0000

> <r_epik_Charging_Adjusted_Penalty>
0

> <i_epik_Tot_Q>
0

> <i_epik_Tot_abs_Q>
0

> <s_lp_Force_Field>
S-OPLS

> <r_lp_Energy>
28.639954

> <b_lp_Chiralities_Consistent>
1

> <s_lp_Variant>
ind_1,25272-1

> <s_i_glide_gridfile>
glide-grid_mmpl3

> <i_i_glide_lignum>
560

> <i_i_glide_rotatable_bonds>
4

> <r_i_docking_score>
-9.40160062118733

> <r_i_glide_ligand_efficiency>
-0.376064024847493

> <r_i_glide_ligand_efficiency_sa>
-1.09961787817795

> <r_i_glide_ligand_efficiency_ln>
-2.22846109045673

> <r_i_glide_gscore>
-9.40160062118733

> <r_i_glide_evdw>
-41.8092346191406

> <r_i_glide_ecoul>
-0.1321881711483

> <r_i_glide_energy>
-41.9414227902889

> <r_i_glide_einternal>
0.425954282283783

> <r_i_glide_emodel>
-60.4492451509797

> <i_i_glide_confnum>
40

> <i_i_glide_posenum>
316

> <r_i_glide_eff_state_penalty>
0

> <i_rge_num_r_groups>
1

> <r_rge_occupation_R1>
1

> <s_rge_R1>
25272

> <s_rge_R1_s_m_title>
25272

> <s_rge_R1_s_m_entry_id>
16383

> <s_rge_R1_s_m_entry_name>
eMol_BB_r-groups.230

> <s_rge_R1_s_m_smiles>
c1cn([*])c(C)c1C

> <b_rge_R1_b_sd_chiral_flag>
0

> <i_rge_R1_i_sd_version>
0

> <s_rge_R1_s_m_Source_File>
eMol_BB_r-groups-dedup.mae

> <i_rge_R1_i_m_Source_File_Index>
157

> <s_rge_R1_s_m_Source_Path>
/Users/konze/projects/pathfinder/r-groups

> <s_rge_R1_s_sd_Source_Path>
/Users/konze/projects/pathfinder/reactant sets/eMolecules

> <s_rge_R1_s_sd_Source_File>
eMol BB r-groups.mae

> <i_rge_R1_i_sd_Source_File_Index>
230

> <r_rge_R1_r_sd_MW>
95.1424

> <i_rge_R1_i_sd_RB>
0

> <i_rge_R1_i_sd_HeavyAtomCount>
7

> <i_rge_R1_i_sd_HBA>
0

> <i_rge_R1_i_sd_HBD>
1

> <r_rge_R1_r_sd_PSA>
15.79

> <i_rge_R1_i_sd_ChiralCenterCount>
0

> <i_rge_R1_i_sd_ChiralCenterCountAllPossible>
0

> <i_rge_R1_i_sd_RingCount>
1

> <r_rge_R1_r_sd_AlogP>
1.0396

> <s_rge_R1_s_sd_subgroup_title>
eMol BB r-groups

> <s_rge_R1_s_sd_subgroupid>
eMol BB r-groups

> <i_rge_R1_i_sd_subgroup_collapsed>
0

> <s_rge_R1_s_sd_Unique_SMILES_Stereo>
Cc1c(C)[nH]cc1

> <i_rge_R1_i_sd_canvasUID>
175

> <s_rge_R1_s_canvas_Unique_SMILES_Stereo>
Cc1c(C)[nH]cc1

> <s_psp_Prime_MMGBSA_Input_Structure_Hash>
6bb7714222de195ca48144834f16611687754fff12fcf6ea1b91dc2d

> <i_psp_number_heavy_atoms>
25

> <r_psp_MMGBSA_dG_Bind>
-42.9147357049296

> <r_psp_MMGBSA_dG_Bind_Coulomb>
-1.40920962535893

> <r_psp_MMGBSA_dG_Bind_Covalent>
2.84092818796762

> <r_psp_MMGBSA_dG_Bind_Hbond>
-0.00860112084387765

> <r_psp_MMGBSA_dG_Bind_Lipo>
-24.0442011860764

> <r_psp_MMGBSA_dG_Bind_Packing>
-3.66082154386049e-005

> <r_psp_MMGBSA_dG_Bind_SelfCont>
7.105427357601e-015

> <r_psp_MMGBSA_dG_Bind_Solv_GB>
17.1759160567044

> <r_psp_MMGBSA_dG_Bind_vdW>
-37.4695314090277

> <r_psp_Lig_Strain_Energy>
6.61034038073691

> <r_psp_Lig_Strain_Coulomb>
0.117232647161721

> <r_psp_Lig_Strain_Covalent>
2.84112905608032

> <r_psp_Lig_Strain_Hbond>
0

> <r_psp_Lig_Strain_Lipo>
0.701988336218341

> <r_psp_Lig_Strain_Packing>
0

> <r_psp_Lig_Strain_SelfCont>
0

> <r_psp_Lig_Strain_Solv_GB>
0.192774039633832

> <r_psp_Lig_Strain_vdW>
2.75721630164266

> <r_psp_Ligand_Energy>
-2.86245565189452

> <r_psp_Ligand_Coulomb>
-23.8587436144834

> <r_psp_Ligand_Covalent>
20.7280717768879

> <r_psp_Ligand_Hbond>
0

> <r_psp_Ligand_Lipo>
-3.18435638911781

> <r_psp_Ligand_Packing>
0

> <r_psp_Ligand_SelfCont>
0

> <r_psp_Ligand_Solv_GB>
-4.69976462289648

> <r_psp_Ligand_vdW>
8.15233719771536

> <r_psp_Complex_Energy>
-34141.0282320906

> <r_psp_Complex_Coulomb>
-26484.1837671828

> <r_psp_Complex_Covalent>
4413.97552578627

> <r_psp_Complex_Hbond>
-550.106206204025

> <r_psp_Complex_Lipo>
-2177.75318991267

> <r_psp_Complex_Packing>
-55.8446790354243

> <r_psp_Complex_SelfCont>
-40.4078915603482

> <r_psp_Complex_Solv_GB>
-5194.07562892878

> <r_psp_Complex_vdW>
-4052.6323950528

> <r_psp_Receptor_Energy>
-34095.2510407338

> <r_psp_Receptor_Coulomb>
-26458.915813943

> <r_psp_Receptor_Covalent>
4390.40652582141

> <r_psp_Receptor_Hbond>
-550.097605083181

> <r_psp_Receptor_Lipo>
-2150.52463233748

> <r_psp_Receptor_Packing>
-55.8446424272089

> <r_psp_Receptor_SelfCont>
-40.4078915603482

> <r_psp_Receptor_Solv_GB>
-5206.55178036259

> <r_psp_Receptor_vdW>
-4023.31520084149

> <r_psp_MMGBSA_dG_Bind(NS)>
-49.5250760856143

> <r_psp_MMGBSA_dG_Bind(NS)_Coulomb>
-1.52644227256314

> <r_psp_MMGBSA_dG_Bind(NS)_Covalent>
-0.000200868111278396

> <r_psp_MMGBSA_dG_Bind(NS)_Hbond>
-0.00860112084365028

> <r_psp_MMGBSA_dG_Bind(NS)_Lipo>
-24.74618952229

> <r_psp_MMGBSA_dG_Bind(NS)_Packing>
-3.66082154883429e-005

> <r_psp_MMGBSA_dG_Bind(NS)_SelfCont>
0

> <r_psp_MMGBSA_dG_Bind(NS)_Solv_GB>
16.9831420170722

> <r_psp_MMGBSA_dG_Bind(NS)_vdW>
-40.2267477106748

> <r_psp_Rec_Strain_Energy>
-5.0931703299284e-011

> <r_psp_Rec_Strain_Coulomb>
4.00177668780088e-011

> <r_psp_Rec_Strain_Covalent>
-9.09494701772928e-013

> <r_psp_Rec_Strain_Hbond>
-2.27373675443232e-013

> <r_psp_Rec_Strain_Lipo>
-5.00222085975111e-012

> <r_psp_Rec_Strain_Packing>
4.9737991503207e-014

> <r_psp_Rec_Strain_SelfCont>
7.105427357601e-015

> <r_psp_Rec_Strain_Solv_GB>
-1.81898940354586e-012

> <r_psp_Rec_Strain_vdW>
4.54747350886464e-012

> <r_psp_Prime_MMGBSA_ligand_efficiency>
-1.71658942819719

> <r_psp_Prime_MMGBSA_ligand_efficiency_sa>
-2.57488414229578

> <r_psp_Prime_MMGBSA_ligand_efficiency_ln>
-10.1720784129195

> <r_i_glide_lipo>
-5.47888564107501

> <r_i_glide_hbond>
0

> <r_i_glide_metal>
0

> <r_i_glide_rewards>
-2.48335425883911

> <r_i_glide_erotb>
0.670929235356062

> <r_i_glide_esite>
0

> <i_psp_ExecuteFunction_Internal_Entry_Index>
84

> <i_qp_#stars>
1

> <i_qp_#amine>
0

> <i_qp_#amidine>
0

> <i_qp_#acid>
0

> <i_qp_#amide>
0

> <i_qp_#rotor>
2

> <i_qp_#rtvFG>
0

> <i_qp_CNS>
0

> <r_qp_mol_MW>
   335.448

> <r_qp_dipole>
     9.163

> <r_qp_SASA>
   662.009

> <r_qp_FOSA>
   381.344

> <r_qp_FISA>
    44.810

> <r_qp_PISA>
   235.855

> <r_qp_WPSA>
     0.000

> <r_qp_volume>
  1158.678

> <r_qp_donorHB>
     2.000

> <r_qp_accptHB>
     2.500

> <r_qp_dip^2/V>
   0.0724620

> <r_qp_ACxDN^.5/SA>
   0.0053406

> <r_qp_glob>
   0.8058911

> <r_qp_QPpolrz>
    41.185

> <r_qp_QPlogPC16>
    11.416

> <r_qp_QPlogPoct>
    18.410

> <r_qp_QPlogPw>
     8.172

> <r_qp_QPlogPo/w>
     5.240

> <r_qp_QPlogS>
    -6.858

> <r_qp_CIQPlogS>
    -5.694

> <r_qp_QPlogHERG>
    -5.798

> <r_qp_QPPCaco>
  3723.603

> <r_qp_QPlogBB>
    -0.017

> <r_qp_QPPMDCK>
  2048.773

> <r_qp_QPlogKp>
    -1.322

> <r_qp_IP(eV)>
     8.131

> <r_qp_EA(eV)>
     0.844

> <i_qp_#metab>
2

> <r_qp_QPlogKhsa>
     1.090

> <i_qp_HumanOralAbsorption>
1

> <r_qp_PercentHumanOralAbsorption>
   100.000

> <r_qp_SAfluorine>
     0.000

> <r_qp_SAamideO>
     0.000

> <r_qp_PSA>
    49.878

> <i_qp_#NandO>
4

> <i_qp_RuleOfFive>
1

> <i_qp_RuleOfThree>
1

> <i_qp_#ringatoms>
20

> <i_qp_#in34>
0

> <i_qp_#in56>
20

> <i_qp_#noncon>
6

> <i_qp_#nonHatm>
25

> <r_qp_Jm>
0.0022121605613703

> <s_m_subgroupid>
1000_str-imp1->adme_1000-out12

> <s_m_subgroup_title>
1000_str->adme_1000-out1

> <b_m_subgroup_collapsed>
0

$$$$
ind_1,25274
                    3D
 Structure written by MMmdl.
 50 53  0  0  1  0            999 V2000
   -3.4303    1.5992   -0.8397 C   0  0  0  0  0  0
   -2.4027    0.6612   -0.6889 C   0  0  0  0  0  0
   -1.0489    1.0365   -0.4640 C   0  0  0  0  0  0
   -0.7389    2.4057   -0.3910 C   0  0  0  0  0  0
   -1.7590    3.3438   -0.5391 C   0  0  0  0  0  0
   -3.0747    2.9455   -0.7586 C   0  0  0  0  0  0
   -0.2670   -0.1701   -0.3612 C   0  0  0  0  0  0
   -1.1613   -1.2375   -0.5137 C   0  0  0  0  0  0
   -2.4204   -0.7121   -0.7218 N   0  0  0  0  0  0
   -0.8820   -2.6576   -0.5709 C   0  0  0  0  0  0
   -1.9408   -3.4545   -0.3202 N   0  0  0  0  0  0
    0.2408   -3.0835   -0.8443 O   0  0  0  0  0  0
   -1.9260   -4.9187   -0.3054 C   0  0  0  0  0  0
   -1.1292   -5.5539    0.8660 C   0  0  0  0  0  0
   -1.1786   -7.0945    0.8848 C   0  0  0  0  0  0
   -2.6153   -7.6341    0.7992 C   0  0  0  0  0  0
   -3.3454   -7.0777   -0.4338 C   0  0  0  0  0  0
   -3.3358   -5.5367   -0.4708 C   0  0  0  0  0  0
   -4.4548    1.3039   -1.0121 H   0  0  0  0  0  0
    0.2773    2.7322   -0.2240 H   0  0  0  0  0  0
   -1.5248    4.3969   -0.4841 H   0  0  0  0  0  0
   -3.8398    3.6999   -0.8698 H   0  0  0  0  0  0
   -3.2238   -1.3022   -0.8826 H   0  0  0  0  0  0
   -2.7964   -3.0215   -0.0056 H   0  0  0  0  0  0
   -1.3957   -5.2245   -1.2112 H   0  0  0  0  0  0
   -0.0869   -5.2335    0.8384 H   0  0  0  0  0  0
   -1.5446   -5.1932    1.8085 H   0  0  0  0  0  0
   -0.5969   -7.4835    0.0476 H   0  0  0  0  0  0
   -0.6951   -7.4691    1.7879 H   0  0  0  0  0  0
   -2.6015   -8.7240    0.7632 H   0  0  0  0  0  0
   -3.1633   -7.3649    1.7036 H   0  0  0  0  0  0
   -2.8719   -7.4634   -1.3382 H   0  0  0  0  0  0
   -4.3733   -7.4421   -0.4523 H   0  0  0  0  0  0
   -3.9726   -5.1809    0.3408 H   0  0  0  0  0  0
   -3.7909   -5.1960   -1.4020 H   0  0  0  0  0  0
    1.2368   -0.1960   -0.1253 C   0  0  0  0  0  0
    2.0105    0.2843   -1.3406 C   0  0  0  0  0  0
    3.1217    1.1616   -1.3519 C   0  0  0  0  0  0
    3.8164    1.7706   -0.1550 C   0  0  0  0  0  0
    3.5245    1.2793   -2.6782 C   0  0  0  0  0  0
    2.6862    0.5503   -3.4705 N   0  0  0  0  0  0
    1.7660   -0.0593   -2.6687 C   0  0  0  0  0  0
    2.7467    0.4631   -4.4750 H   0  0  0  0  0  0
    1.4658    0.4250    0.7410 H   0  0  0  0  0  0
    1.5863   -1.1875    0.1579 H   0  0  0  0  0  0
    4.8566    2.0213   -0.3657 H   0  0  0  0  0  0
    3.8395    1.0781    0.6867 H   0  0  0  0  0  0
    3.3094    2.6710    0.1921 H   0  0  0  0  0  0
    4.3417    1.8276   -3.1227 H   0  0  0  0  0  0
    1.0136   -0.7006   -3.1037 H   0  0  0  0  0  0
  1  2  2  0  0  0
  1  6  1  0  0  0
  1 19  1  0  0  0
  2  3  1  0  0  0
  2  9  1  0  0  0
  3  4  2  0  0  0
  3  7  1  0  0  0
  4  5  1  0  0  0
  4 20  1  0  0  0
  5  6  2  0  0  0
  5 21  1  0  0  0
  6 22  1  0  0  0
  7  8  2  0  0  0
  7 36  1  0  0  0
  8  9  1  0  0  0
  8 10  1  0  0  0
  9 23  1  0  0  0
 10 11  1  0  0  0
 10 12  2  0  0  0
 11 13  1  0  0  0
 11 24  1  0  0  0
 13 18  1  0  0  0
 13 14  1  0  0  0
 13 25  1  0  0  0
 14 15  1  0  0  0
 14 26  1  0  0  0
 14 27  1  0  0  0
 15 16  1  0  0  0
 15 28  1  0  0  0
 15 29  1  0  0  0
 16 17  1  0  0  0
 16 30  1  0  0  0
 16 31  1  0  0  0
 17 18  1  0  0  0
 17 32  1  0  0  0
 17 33  1  0  0  0
 18 34  1  0  0  0
 18 35  1  0  0  0
 36 37  1  0  0  0
 36 44  1  0  0  0
 36 45  1  0  0  0
 37 42  2  0  0  0
 37 38  1  0  0  0
 38 39  1  0  0  0
 38 40  2  0  0  0
 39 46  1  0  0  0
 39 47  1  0  0  0
 39 48  1  0  0  0
 40 41  1  0  0  0
 40 49  1  0  0  0
 41 42  1  0  0  0
 41 43  1  0  0  0
 42 50  1  0  0  0
M  END
> <s_m_entry_id>
7879

> <s_m_entry_name>
entry

> <i_f3d_flags>
0

> <s_m_job_name>
adme_1000

> <r_psp_Prime_Energy>
-34131.4092235918

> <r_psp_Prime_Solv_GB>
-5190.17168108727

> <r_psp_Prime_Coulomb>
-26478.5111823906

> <r_psp_Prime_vdW>
-4060.75478586793

> <r_psp_Prime_Covalent>
4421.83445487484

> <i_psp_model_num>
0

> <r_psp_Prime_Lipo>
-2177.39487584296

> <s_psp_Prime_Energy_Force_Field>
S-OPLS

> <s_psp_Prime_Energy_Solvent_Model>
VSGB2.1

> <r_psp_Prime_Hbond>
-550.158619290324

> <r_psp_Prime_Packing>
-55.8446424272089

> <r_psp_Prime_SelfCont>
-40.4078915603482

> <r_psp_Memb1_x>
103.457542316003

> <r_psp_Memb1_y>
39.4731108300965

> <r_psp_Memb1_z>
48.7987221124676

> <r_psp_Memb2_x>
99.8134167309003

> <r_psp_Memb2_y>
2.81176945184187

> <r_psp_Memb2_z>
23.8404289603493

> <r_psp_MembDummyRadius>
4.45

> <r_psp_Prime_Bond_Covalent>
468.301550452207

> <r_psp_Prime_Bond_SGB>
49968.7644084634

> <r_psp_Prime_Angle_Covalent>
2230.47641762789

> <r_psp_Prime_Angle_SGB>
-21651.0889320273

> <r_psp_Prime_Torsion_Covalent>
1723.05648679474

> <r_psp_Prime_NB14_LJ>
4236.75641724554

> <r_psp_Prime_NB14_Lipo>
0

> <r_psp_Prime_NB14_Elec>
25568.6353250005

> <r_psp_Prime_NB14_SGB>
-15623.4980623941

> <r_psp_Prime_NBShort_LJ>
-7882.32320019591

> <r_psp_Prime_NBShort_Lipo>
-2177.39487584296

> <r_psp_Prime_NBShort_Elec>
-53061.7846491115

> <r_psp_Prime_NBShort_SGB>
18021.8227078179

> <r_psp_Prime_NBLong_LJ>
-415.188002917562

> <r_psp_Prime_NBLong_Lipo>
0

> <r_psp_Prime_NBLong_Elec>
1014.63814172041

> <r_psp_Prime_NBLong_SGB>
-1165.25593336872

> <r_psp_Prime_Self_SGB>
-34740.9158695784

> <s_m_Source_Path>
F:\Dekstop_files\DAC4,5\Molecular Systems Desgn and Engineering\supplementary_str

> <s_m_Source_File>
1000_str.mae

> <i_m_Source_File_Index>
803

> <i_lp_mmshare_version>
53156

> <s_epik_input>
W2NIXTFbbkhdW2NIXWMoW0NIM10pYzFbQ0gyXWMoYyhjMjMpW2NIXVtjSF1bY0hdW2NIXTIpYyhbbkhdMylDKD1PKVtOSF1bQ0hdNFtDSDJdW0NIMl1bQ0gyXVtDSDJdW0NIMl00

> <s_epik_cmdline>
J2VwaWtfcHl0aG9uJywgJy1waHQnLCAnMC4wJywgJy1waCcsICc3LjAnLCAnLXRuJywgJzgnLCAnLW1hJywgJzUwMCcsICctaW1hZScsICc8aW5maWxlLm1hZT4nLCAnLW9tYWUnLCAnPG91dGZpbGUubWFlPic=

> <r_lp_tautomer_probability>
1

> <r_epik_Ionization_Penalty>
  0.0000

> <r_epik_Ionization_Penalty_Charging>
  0.0000

> <r_epik_Ionization_Penalty_Neutral>
  0.0000

> <r_epik_State_Penalty>
  0.0000

> <r_epik_Charging_Adjusted_Penalty>
0

> <i_epik_Tot_Q>
0

> <i_epik_Tot_abs_Q>
0

> <s_lp_Force_Field>
S-OPLS

> <r_lp_Energy>
34.984472

> <b_lp_Chiralities_Consistent>
1

> <s_lp_Variant>
ind_1,25274-1

> <s_i_glide_gridfile>
glide-grid_mmpl3

> <i_i_glide_lignum>
563

> <i_i_glide_rotatable_bonds>
5

> <r_i_docking_score>
-9.14733945055618

> <r_i_glide_ligand_efficiency>
-0.365893578022247

> <r_i_glide_ligand_efficiency_sa>
-1.06987931128729

> <r_i_glide_ligand_efficiency_ln>
-2.16819357342473

> <r_i_glide_gscore>
-9.14733945055618

> <r_i_glide_evdw>
-44.0448150634766

> <r_i_glide_ecoul>
1.41070067882538

> <r_i_glide_energy>
-42.6341143846512

> <r_i_glide_einternal>
2.14020681381226

> <r_i_glide_emodel>
-65.3806341455883

> <i_i_glide_confnum>
33

> <i_i_glide_posenum>
237

> <r_i_glide_eff_state_penalty>
0

> <i_rge_num_r_groups>
1

> <r_rge_occupation_R1>
1

> <s_rge_R1>
25274

> <s_rge_R1_s_m_title>
25274

> <s_rge_R1_s_m_entry_id>
16386

> <s_rge_R1_s_m_entry_name>
eMol_BB_r-groups.231

> <s_rge_R1_s_m_smiles>
[*]Cc1c(C)c[nH]c1

> <b_rge_R1_b_sd_chiral_flag>
0

> <i_rge_R1_i_sd_version>
0

> <s_rge_R1_s_m_Source_File>
eMol_BB_r-groups-dedup.mae

> <i_rge_R1_i_m_Source_File_Index>
158

> <s_rge_R1_s_m_Source_Path>
/Users/konze/projects/pathfinder/r-groups

> <s_rge_R1_s_sd_Source_Path>
/Users/konze/projects/pathfinder/reactant sets/eMolecules

> <s_rge_R1_s_sd_Source_File>
eMol BB r-groups.mae

> <i_rge_R1_i_sd_Source_File_Index>
231

> <r_rge_R1_r_sd_MW>
95.1424

> <i_rge_R1_i_sd_RB>
0

> <i_rge_R1_i_sd_HeavyAtomCount>
7

> <i_rge_R1_i_sd_HBA>
0

> <i_rge_R1_i_sd_HBD>
1

> <r_rge_R1_r_sd_PSA>
15.79

> <i_rge_R1_i_sd_ChiralCenterCount>
0

> <i_rge_R1_i_sd_ChiralCenterCountAllPossible>
0

> <i_rge_R1_i_sd_RingCount>
1

> <r_rge_R1_r_sd_AlogP>
1.2432

> <s_rge_R1_s_sd_subgroup_title>
eMol BB r-groups

> <s_rge_R1_s_sd_subgroupid>
eMol BB r-groups

> <i_rge_R1_i_sd_subgroup_collapsed>
0

> <s_rge_R1_s_sd_Unique_SMILES_Stereo>
Cc1c(C)c[nH]c1

> <i_rge_R1_i_sd_canvasUID>
176

> <s_rge_R1_s_canvas_Unique_SMILES_Stereo>
Cc1c(C)c[nH]c1

> <s_psp_Prime_MMGBSA_Input_Structure_Hash>
78f37808ed9174e7571878076f1aa74b2530d845c1e57c2625e58bd4

> <i_psp_number_heavy_atoms>
25

> <r_psp_MMGBSA_dG_Bind>
-36.664290837165

> <r_psp_MMGBSA_dG_Bind_Coulomb>
3.98320906082881

> <r_psp_MMGBSA_dG_Bind_Covalent>
3.48418879055771

> <r_psp_MMGBSA_dG_Bind_Hbond>
-0.0610142071433302

> <r_psp_MMGBSA_dG_Bind_Lipo>
-23.1176170969329

> <r_psp_MMGBSA_dG_Bind_Packing>
4.9737991503207e-014

> <r_psp_MMGBSA_dG_Bind_SelfCont>
7.105427357601e-015

> <r_psp_MMGBSA_dG_Bind_Solv_GB>
24.257314003512

> <r_psp_MMGBSA_dG_Bind_vdW>
-45.2103713878864

> <r_psp_Lig_Strain_Energy>
10.6102042909622

> <r_psp_Lig_Strain_Coulomb>
1.39311447836

> <r_psp_Lig_Strain_Covalent>
3.48438965866967

> <r_psp_Lig_Strain_Hbond>
0

> <r_psp_Lig_Strain_Lipo>
1.24642630125046

> <r_psp_Lig_Strain_Packing>
0

> <r_psp_Lig_Strain_SelfCont>
0

> <r_psp_Lig_Strain_Solv_GB>
0.0818223578599202

> <r_psp_Lig_Strain_vdW>
4.40445149482207

> <r_psp_Ligand_Energy>
0.506107979152944

> <r_psp_Ligand_Coulomb>
-23.5785775084206

> <r_psp_Ligand_Covalent>
27.9437402628704

> <r_psp_Ligand_Hbond>
0

> <r_psp_Ligand_Lipo>
-3.75262640855176

> <r_psp_Ligand_Packing>
0

> <r_psp_Ligand_SelfCont>
0

> <r_psp_Ligand_Solv_GB>
-7.87721472819308

> <r_psp_Ligand_vdW>
7.77078636144806

> <r_psp_Complex_Energy>
-34131.4092235918

> <r_psp_Complex_Coulomb>
-26478.5111823906

> <r_psp_Complex_Covalent>
4421.83445487484

> <r_psp_Complex_Hbond>
-550.158619290324

> <r_psp_Complex_Lipo>
-2177.39487584296

> <r_psp_Complex_Packing>
-55.8446424272089

> <r_psp_Complex_SelfCont>
-40.4078915603482

> <r_psp_Complex_Solv_GB>
-5190.17168108727

> <r_psp_Complex_vdW>
-4060.75478586793

> <r_psp_Receptor_Energy>
-34095.2510407338

> <r_psp_Receptor_Coulomb>
-26458.915813943

> <r_psp_Receptor_Covalent>
4390.40652582141

> <r_psp_Receptor_Hbond>
-550.097605083181

> <r_psp_Receptor_Lipo>
-2150.52463233748

> <r_psp_Receptor_Packing>
-55.8446424272089

> <r_psp_Receptor_SelfCont>
-40.4078915603482

> <r_psp_Receptor_Solv_GB>
-5206.55178036259

> <r_psp_Receptor_vdW>
-4023.31520084149

> <r_psp_MMGBSA_dG_Bind(NS)>
-47.2744951280765

> <r_psp_MMGBSA_dG_Bind(NS)_Coulomb>
2.59009458242872

> <r_psp_MMGBSA_dG_Bind(NS)_Covalent>
-0.000200868111278396

> <r_psp_MMGBSA_dG_Bind(NS)_Hbond>
-0.0610142071431028

> <r_psp_MMGBSA_dG_Bind(NS)_Lipo>
-24.3640433981786

> <r_psp_MMGBSA_dG_Bind(NS)_Packing>
0

> <r_psp_MMGBSA_dG_Bind(NS)_SelfCont>
0

> <r_psp_MMGBSA_dG_Bind(NS)_Solv_GB>
24.1754916456539

> <r_psp_MMGBSA_dG_Bind(NS)_vdW>
-49.6148228827128

> <r_psp_Rec_Strain_Energy>
-5.0931703299284e-011

> <r_psp_Rec_Strain_Coulomb>
4.00177668780088e-011

> <r_psp_Rec_Strain_Covalent>
-9.09494701772928e-013

> <r_psp_Rec_Strain_Hbond>
-2.27373675443232e-013

> <r_psp_Rec_Strain_Lipo>
-5.00222085975111e-012

> <r_psp_Rec_Strain_Packing>
4.9737991503207e-014

> <r_psp_Rec_Strain_SelfCont>
7.105427357601e-015

> <r_psp_Rec_Strain_Solv_GB>
-1.81898940354586e-012

> <r_psp_Rec_Strain_vdW>
4.54747350886464e-012

> <r_psp_Prime_MMGBSA_ligand_efficiency>
-1.4665716334866

> <r_psp_Prime_MMGBSA_ligand_efficiency_sa>
-2.1998574502299

> <r_psp_Prime_MMGBSA_ligand_efficiency_ln>
-8.69053566854162

> <r_i_glide_lipo>
-5.97628525123437

> <r_i_glide_hbond>
0

> <r_i_glide_metal>
0

> <r_i_glide_rewards>
-2.01908009216686

> <r_i_glide_erotb>
0.838661544195077

> <r_i_glide_esite>
0

> <i_psp_ExecuteFunction_Internal_Entry_Index>
198

> <i_qp_#stars>
0

> <i_qp_#amine>
0

> <i_qp_#amidine>
0

> <i_qp_#acid>
0

> <i_qp_#amide>
0

> <i_qp_#rotor>
4

> <i_qp_#rtvFG>
0

> <i_qp_CNS>
-1

> <r_qp_mol_MW>
   335.448

> <r_qp_dipole>
     5.541

> <r_qp_SASA>
   654.969

> <r_qp_FOSA>
   338.735

> <r_qp_FISA>
    78.484

> <r_qp_PISA>
   237.750

> <r_qp_WPSA>
     0.000

> <r_qp_volume>
  1149.566

> <r_qp_donorHB>
     3.000

> <r_qp_accptHB>
     3.000

> <r_qp_dip^2/V>
   0.0267125

> <r_qp_ACxDN^.5/SA>
   0.0079334

> <r_qp_glob>
   0.8102774

> <r_qp_QPpolrz>
    39.554

> <r_qp_QPlogPC16>
    11.803

> <r_qp_QPlogPoct>
    19.054

> <r_qp_QPlogPw>
     9.913

> <r_qp_QPlogPo/w>
     4.521

> <r_qp_QPlogS>
    -5.995

> <r_qp_CIQPlogS>
    -5.377

> <r_qp_QPlogHERG>
    -5.736

> <r_qp_QPPCaco>
  1784.981

> <r_qp_QPlogBB>
    -0.475

> <r_qp_QPPMDCK>
   925.414

> <r_qp_QPlogKp>
    -1.744

> <r_qp_IP(eV)>
     8.224

> <r_qp_EA(eV)>
     0.255

> <i_qp_#metab>
2

> <r_qp_QPlogKhsa>
     0.772

> <i_qp_HumanOralAbsorption>
3

> <r_qp_PercentHumanOralAbsorption>
   100.000

> <r_qp_SAfluorine>
     0.000

> <r_qp_SAamideO>
     0.000

> <r_qp_PSA>
    62.688

> <i_qp_#NandO>
4

> <i_qp_RuleOfFive>
0

> <i_qp_RuleOfThree>
1

> <i_qp_#ringatoms>
20

> <i_qp_#in34>
0

> <i_qp_#in56>
20

> <i_qp_#noncon>
6

> <i_qp_#nonHatm>
25

> <r_qp_Jm>
0.00611138168294231

> <s_m_subgroupid>
1000_str-imp1->adme_1000-out12

> <s_m_subgroup_title>
1000_str->adme_1000-out1

> <b_m_subgroup_collapsed>
0

$$$$
ind_1,25274
                    3D
 Structure written by MMmdl.
 50 53  0  0  1  0            999 V2000
   -3.2979    1.7314    0.2319 C   0  0  0  0  0  0
   -2.2393    0.8188    0.1652 C   0  0  0  0  0  0
   -0.8748    1.2248    0.1677 C   0  0  0  0  0  0
   -0.5885    2.5992    0.2509 C   0  0  0  0  0  0
   -1.6397    3.5116    0.3188 C   0  0  0  0  0  0
   -2.9641    3.0834    0.3079 C   0  0  0  0  0  0
   -0.0691    0.0329    0.0815 C   0  0  0  0  0  0
   -0.9506   -1.0575    0.0559 C   0  0  0  0  0  0
   -2.2354   -0.5537    0.0852 N   0  0  0  0  0  0
   -0.6605   -2.4710   -0.0887 C   0  0  0  0  0  0
   -1.6531   -3.2986    0.2982 N   0  0  0  0  0  0
    0.4257   -2.8654   -0.5154 O   0  0  0  0  0  0
   -1.6147   -4.7621    0.2508 C   0  0  0  0  0  0
   -2.6481   -5.4266    1.1925 C   0  0  0  0  0  0
   -2.6266   -6.9673    1.1455 C   0  0  0  0  0  0
   -2.7270   -7.5064   -0.2905 C   0  0  0  0  0  0
   -1.6260   -6.9154   -1.1860 C   0  0  0  0  0  0
   -1.6257   -5.3739   -1.1760 C   0  0  0  0  0  0
   -4.3300    1.4129    0.2263 H   0  0  0  0  0  0
    0.4324    2.9504    0.2648 H   0  0  0  0  0  0
   -1.4233    4.5681    0.3813 H   0  0  0  0  0  0
   -3.7538    3.8185    0.3612 H   0  0  0  0  0  0
   -3.0443   -1.1565    0.0458 H   0  0  0  0  0  0
   -2.5342   -2.8913    0.5744 H   0  0  0  0  0  0
   -0.6484   -5.0495    0.6738 H   0  0  0  0  0  0
   -2.4898   -5.0957    2.2201 H   0  0  0  0  0  0
   -3.6487   -5.0982    0.9060 H   0  0  0  0  0  0
   -1.7047   -7.3293    1.6037 H   0  0  0  0  0  0
   -3.4417   -7.3679    1.7498 H   0  0  0  0  0  0
   -2.6567   -8.5947   -0.2845 H   0  0  0  0  0  0
   -3.7070   -7.2656   -0.7055 H   0  0  0  0  0  0
   -0.6536   -7.2768   -0.8475 H   0  0  0  0  0  0
   -1.7439   -7.2791   -2.2076 H   0  0  0  0  0  0
   -2.5214   -5.0333   -1.6979 H   0  0  0  0  0  0
   -0.7714   -5.0165   -1.7523 H   0  0  0  0  0  0
    4.9098    0.7647   -0.9964 C   0  0  0  0  0  0
    3.5993    0.2865   -0.4131 C   0  0  0  0  0  0
    2.2988    0.7129   -0.7727 C   0  0  0  0  0  0
    1.9506    1.6391   -1.9195 C   0  0  0  0  0  0
    1.3928    0.0183    0.0375 C   0  0  0  0  0  0
    2.1194   -0.7395    0.9153 N   0  0  0  0  0  0
    3.4491   -0.5698    0.6676 C   0  0  0  0  0  0
    1.7294   -1.3324    1.6338 H   0  0  0  0  0  0
    4.8535    1.8093   -1.3038 H   0  0  0  0  0  0
    5.1977    0.1867   -1.8745 H   0  0  0  0  0  0
    5.7236    0.7096   -0.2729 H   0  0  0  0  0  0
    0.9648    1.4269   -2.3346 H   0  0  0  0  0  0
    2.6505    1.5307   -2.7484 H   0  0  0  0  0  0
    1.9728    2.6860   -1.6181 H   0  0  0  0  0  0
    4.1802   -1.0898    1.2689 H   0  0  0  0  0  0
  1  2  2  0  0  0
  1  6  1  0  0  0
  1 19  1  0  0  0
  2  3  1  0  0  0
  2  9  1  0  0  0
  3  4  2  0  0  0
  3  7  1  0  0  0
  4  5  1  0  0  0
  4 20  1  0  0  0
  5  6  2  0  0  0
  5 21  1  0  0  0
  6 22  1  0  0  0
  7  8  2  0  0  0
  7 40  1  0  0  0
  8  9  1  0  0  0
  8 10  1  0  0  0
  9 23  1  0  0  0
 10 11  1  0  0  0
 10 12  2  0  0  0
 11 13  1  0  0  0
 11 24  1  0  0  0
 13 18  1  0  0  0
 13 14  1  0  0  0
 13 25  1  0  0  0
 14 15  1  0  0  0
 14 26  1  0  0  0
 14 27  1  0  0  0
 15 16  1  0  0  0
 15 28  1  0  0  0
 15 29  1  0  0  0
 16 17  1  0  0  0
 16 30  1  0  0  0
 16 31  1  0  0  0
 17 18  1  0  0  0
 17 32  1  0  0  0
 17 33  1  0  0  0
 18 34  1  0  0  0
 18 35  1  0  0  0
 36 37  1  0  0  0
 36 44  1  0  0  0
 36 45  1  0  0  0
 36 46  1  0  0  0
 37 42  2  0  0  0
 37 38  1  0  0  0
 38 39  1  0  0  0
 38 40  2  0  0  0
 39 47  1  0  0  0
 39 48  1  0  0  0
 39 49  1  0  0  0
 40 41  1  0  0  0
 41 42  1  0  0  0
 41 43  1  0  0  0
 42 50  1  0  0  0
M  END
> <s_m_entry_id>
7963

> <s_m_entry_name>
entry

> <i_f3d_flags>
0

> <s_m_job_name>
adme_1000

> <r_psp_Prime_Energy>
-34126.2184916501

> <r_psp_Prime_Solv_GB>
-5190.07165698828

> <r_psp_Prime_Coulomb>
-26470.3267094966

> <r_psp_Prime_vdW>
-4058.30418533511

> <r_psp_Prime_Covalent>
4414.87229336536

> <i_psp_model_num>
0

> <r_psp_Prime_Lipo>
-2176.03258069351

> <s_psp_Prime_Energy_Force_Field>
S-OPLS

> <s_psp_Prime_Energy_Solvent_Model>
VSGB2.1

> <r_psp_Prime_Hbond>
-550.103118514426

> <r_psp_Prime_Packing>
-55.8446424272089

> <r_psp_Prime_SelfCont>
-40.4078915603482

> <r_psp_Memb1_x>
103.457542316003

> <r_psp_Memb1_y>
39.4731108300965

> <r_psp_Memb1_z>
48.7987221124676

> <r_psp_Memb2_x>
99.8134167309003

> <r_psp_Memb2_y>
2.81176945184187

> <r_psp_Memb2_z>
23.8404289603493

> <r_psp_MembDummyRadius>
4.45

> <r_psp_Prime_Bond_Covalent>
469.876190803083

> <r_psp_Prime_Bond_SGB>
49966.9045879618

> <r_psp_Prime_Angle_Covalent>
2228.42210207851

> <r_psp_Prime_Angle_SGB>
-21652.1852845808

> <r_psp_Prime_Torsion_Covalent>
1716.57400048377

> <r_psp_Prime_NB14_LJ>
4236.2030413383

> <r_psp_Prime_NB14_Lipo>
0

> <r_psp_Prime_NB14_Elec>
25577.6209917083

> <r_psp_Prime_NB14_SGB>
-15624.6321570551

> <r_psp_Prime_NBShort_LJ>
-7879.28543513965

> <r_psp_Prime_NBShort_Lipo>
-2176.03258069351

> <r_psp_Prime_NBShort_Elec>
-53068.5418688549

> <r_psp_Prime_NBShort_SGB>
18021.6924491095

> <r_psp_Prime_NBLong_LJ>
-415.221791533763

> <r_psp_Prime_NBLong_Lipo>
0

> <r_psp_Prime_NBLong_Elec>
1020.59416764991

> <r_psp_Prime_NBLong_SGB>
-1163.77709572802

> <r_psp_Prime_Self_SGB>
-34738.0741566957

> <s_m_Source_Path>
F:\Dekstop_files\DAC4,5\Molecular Systems Desgn and Engineering\supplementary_str

> <s_m_Source_File>
1000_str.mae

> <i_m_Source_File_Index>
887

> <i_lp_mmshare_version>
53156

> <s_epik_input>
W2NIXTFbY0hdW2NIXVtjSF1jKGMxMiljKC1jKFtuSF1bY0hdMyljKFtDSDNdKWMzW0NIM10pYyhbbkhdMilDKD1PKVtOSF1bQ0hdNFtDSDJdW0NIMl1bQ0gyXVtDSDJdW0NIMl00

> <s_epik_cmdline>
J2VwaWtfcHl0aG9uJywgJy1waHQnLCAnMC4wJywgJy1waCcsICc3LjAnLCAnLXRuJywgJzgnLCAnLW1hJywgJzUwMCcsICctaW1hZScsICc8aW5maWxlLm1hZT4nLCAnLW9tYWUnLCAnPG91dGZpbGUubWFlPic=

> <r_lp_tautomer_probability>
1

> <r_epik_Ionization_Penalty>
  0.0000

> <r_epik_Ionization_Penalty_Charging>
  0.0000

> <r_epik_Ionization_Penalty_Neutral>
  0.0000

> <r_epik_State_Penalty>
  0.0000

> <r_epik_Charging_Adjusted_Penalty>
0

> <i_epik_Tot_Q>
0

> <i_epik_Tot_abs_Q>
0

> <s_lp_Force_Field>
S-OPLS

> <r_lp_Energy>
28.417555

> <b_lp_Chiralities_Consistent>
1

> <s_lp_Variant>
ind_1,25274-1

> <s_i_glide_gridfile>
glide-grid_mmpl3

> <i_i_glide_lignum>
564

> <i_i_glide_rotatable_bonds>
4

> <r_i_docking_score>
-7.73715678993195

> <r_i_glide_ligand_efficiency>
-0.309486271597278

> <r_i_glide_ligand_efficiency_sa>
-0.904943346912839

> <r_i_glide_ligand_efficiency_ln>
-1.8339380230926

> <r_i_glide_gscore>
-7.73715678993195

> <r_i_glide_evdw>
-40.7324295043945

> <r_i_glide_ecoul>
0.593931078910828

> <r_i_glide_energy>
-40.1384984254837

> <r_i_glide_einternal>
1.42471480369568

> <r_i_glide_emodel>
-56.4202171435713

> <i_i_glide_confnum>
23

> <i_i_glide_posenum>
345

> <r_i_glide_eff_state_penalty>
0

> <i_rge_num_r_groups>
1

> <r_rge_occupation_R1>
1

> <s_rge_R1>
25274

> <s_rge_R1_s_m_title>
25274

> <s_rge_R1_s_m_entry_id>
16387

> <s_rge_R1_s_m_entry_name>
eMol_BB_r-groups.231

> <s_rge_R1_s_m_smiles>
Cc1c([*])[nH]cc1C

> <b_rge_R1_b_sd_chiral_flag>
0

> <i_rge_R1_i_sd_version>
0

> <s_rge_R1_s_m_Source_File>
eMol_BB_r-groups-dedup.mae

> <i_rge_R1_i_m_Source_File_Index>
158

> <s_rge_R1_s_m_Source_Path>
/Users/konze/projects/pathfinder/r-groups

> <s_rge_R1_s_sd_Source_Path>
/Users/konze/projects/pathfinder/reactant sets/eMolecules

> <s_rge_R1_s_sd_Source_File>
eMol BB r-groups.mae

> <i_rge_R1_i_sd_Source_File_Index>
231

> <r_rge_R1_r_sd_MW>
95.1424

> <i_rge_R1_i_sd_RB>
0

> <i_rge_R1_i_sd_HeavyAtomCount>
7

> <i_rge_R1_i_sd_HBA>
0

> <i_rge_R1_i_sd_HBD>
1

> <r_rge_R1_r_sd_PSA>
15.79

> <i_rge_R1_i_sd_ChiralCenterCount>
0

> <i_rge_R1_i_sd_ChiralCenterCountAllPossible>
0

> <i_rge_R1_i_sd_RingCount>
1

> <r_rge_R1_r_sd_AlogP>
1.2432

> <s_rge_R1_s_sd_subgroup_title>
eMol BB r-groups

> <s_rge_R1_s_sd_subgroupid>
eMol BB r-groups

> <i_rge_R1_i_sd_subgroup_collapsed>
0

> <s_rge_R1_s_sd_Unique_SMILES_Stereo>
Cc1c(C)c[nH]c1

> <i_rge_R1_i_sd_canvasUID>
176

> <s_rge_R1_s_canvas_Unique_SMILES_Stereo>
Cc1c(C)c[nH]c1

> <s_psp_Prime_MMGBSA_Input_Structure_Hash>
f1baf1226d57db908f7f176d6eabf88c05463c55bfd17c5455deb2e7

> <i_psp_number_heavy_atoms>
25

> <r_psp_MMGBSA_dG_Bind>
-38.4891930082304

> <r_psp_MMGBSA_dG_Bind_Coulomb>
4.92732104242532

> <r_psp_MMGBSA_dG_Bind_Covalent>
2.48126378800043

> <r_psp_MMGBSA_dG_Bind_Hbond>
-0.00551343124527648

> <r_psp_MMGBSA_dG_Bind_Lipo>
-24.0860610188547

> <r_psp_MMGBSA_dG_Bind_Packing>
4.9737991503207e-014

> <r_psp_MMGBSA_dG_Bind_SelfCont>
7.105427357601e-015

> <r_psp_MMGBSA_dG_Bind_Solv_GB>
23.7530748685922

> <r_psp_MMGBSA_dG_Bind_vdW>
-45.5592782570511

> <r_psp_Lig_Strain_Energy>
4.29897765794409

> <r_psp_Lig_Strain_Coulomb>
-0.686817335874203

> <r_psp_Lig_Strain_Covalent>
2.48146465611399

> <r_psp_Lig_Strain_Hbond>
0

> <r_psp_Lig_Strain_Lipo>
0.0246554973200701

> <r_psp_Lig_Strain_Packing>
0

> <r_psp_Lig_Strain_SelfCont>
0

> <r_psp_Lig_Strain_Solv_GB>
-0.442349346966651

> <r_psp_Lig_Strain_vdW>
2.92202418735089

> <r_psp_Ligand_Energy>
7.52174209188895

> <r_psp_Ligand_Coulomb>
-16.3382165960272

> <r_psp_Ligand_Covalent>
21.9845037559503

> <r_psp_Ligand_Hbond>
0

> <r_psp_Ligand_Lipo>
-1.42188733717849

> <r_psp_Ligand_Packing>
0

> <r_psp_Ligand_SelfCont>
0

> <r_psp_Ligand_Solv_GB>
-7.27295149428512

> <r_psp_Ligand_vdW>
10.5702937634295

> <r_psp_Complex_Energy>
-34126.2184916501

> <r_psp_Complex_Coulomb>
-26470.3267094966

> <r_psp_Complex_Covalent>
4414.87229336536

> <r_psp_Complex_Hbond>
-550.103118514426

> <r_psp_Complex_Lipo>
-2176.03258069351

> <r_psp_Complex_Packing>
-55.8446424272089

> <r_psp_Complex_SelfCont>
-40.4078915603482

> <r_psp_Complex_Solv_GB>
-5190.07165698828

> <r_psp_Complex_vdW>
-4058.30418533511

> <r_psp_Receptor_Energy>
-34095.2510407338

> <r_psp_Receptor_Coulomb>
-26458.915813943

> <r_psp_Receptor_Covalent>
4390.40652582141

> <r_psp_Receptor_Hbond>
-550.097605083181

> <r_psp_Receptor_Lipo>
-2150.52463233748

> <r_psp_Receptor_Packing>
-55.8446424272089

> <r_psp_Receptor_SelfCont>
-40.4078915603482

> <r_psp_Receptor_Solv_GB>
-5206.55178036259

> <r_psp_Receptor_vdW>
-4023.31520084149

> <r_psp_MMGBSA_dG_Bind(NS)>
-42.788170666121

> <r_psp_MMGBSA_dG_Bind(NS)_Coulomb>
5.61413837825967

> <r_psp_MMGBSA_dG_Bind(NS)_Covalent>
-0.000200868112187891

> <r_psp_MMGBSA_dG_Bind(NS)_Hbond>
-0.00551343124504911

> <r_psp_MMGBSA_dG_Bind(NS)_Lipo>
-24.1107165161698

> <r_psp_MMGBSA_dG_Bind(NS)_Packing>
0

> <r_psp_MMGBSA_dG_Bind(NS)_SelfCont>
0

> <r_psp_MMGBSA_dG_Bind(NS)_Solv_GB>
24.1954242155607

> <r_psp_MMGBSA_dG_Bind(NS)_vdW>
-48.4813024444065

> <r_psp_Rec_Strain_Energy>
-5.0931703299284e-011

> <r_psp_Rec_Strain_Coulomb>
4.00177668780088e-011

> <r_psp_Rec_Strain_Covalent>
-9.09494701772928e-013

> <r_psp_Rec_Strain_Hbond>
-2.27373675443232e-013

> <r_psp_Rec_Strain_Lipo>
-5.00222085975111e-012

> <r_psp_Rec_Strain_Packing>
4.9737991503207e-014

> <r_psp_Rec_Strain_SelfCont>
7.105427357601e-015

> <r_psp_Rec_Strain_Solv_GB>
-1.81898940354586e-012

> <r_psp_Rec_Strain_vdW>
4.54747350886464e-012

> <r_psp_Prime_MMGBSA_ligand_efficiency>
-1.53956772032921

> <r_psp_Prime_MMGBSA_ligand_efficiency_sa>
-2.30935158049382

> <r_psp_Prime_MMGBSA_ligand_efficiency_ln>
-9.12309217098912

> <r_i_glide_lipo>
-4.24410738161281

> <r_i_glide_hbond>
0

> <r_i_glide_metal>
0

> <r_i_glide_rewards>
-2.21644683029209

> <r_i_glide_erotb>
0.670929235356062

> <r_i_glide_esite>
0

> <i_psp_ExecuteFunction_Internal_Entry_Index>
2107

> <i_qp_#stars>
1

> <i_qp_#amine>
0

> <i_qp_#amidine>
0

> <i_qp_#acid>
0

> <i_qp_#amide>
0

> <i_qp_#rotor>
2

> <i_qp_#rtvFG>
0

> <i_qp_CNS>
-1

> <r_qp_mol_MW>
   335.448

> <r_qp_dipole>
     7.956

> <r_qp_SASA>
   659.038

> <r_qp_FOSA>
   381.143

> <r_qp_FISA>
    64.272

> <r_qp_PISA>
   213.623

> <r_qp_WPSA>
     0.000

> <r_qp_volume>
  1150.460

> <r_qp_donorHB>
     3.000

> <r_qp_accptHB>
     2.500

> <r_qp_dip^2/V>
   0.0550219

> <r_qp_ACxDN^.5/SA>
   0.0065704

> <r_qp_glob>
   0.8056914

> <r_qp_QPpolrz>
    40.643

> <r_qp_QPlogPC16>
    11.544

> <r_qp_QPlogPoct>
    19.493

> <r_qp_QPlogPw>
     9.611

> <r_qp_QPlogPo/w>
     4.780

> <r_qp_QPlogS>
    -6.464

> <r_qp_CIQPlogS>
    -5.546

> <r_qp_QPlogHERG>
    -5.695

> <r_qp_QPPCaco>
  2434.501

> <r_qp_QPlogBB>
    -0.217

> <r_qp_QPPMDCK>
  1294.236

> <r_qp_QPlogKp>
    -1.759

> <r_qp_IP(eV)>
     7.990

> <r_qp_EA(eV)>
     0.507

> <i_qp_#metab>
3

> <r_qp_QPlogKhsa>
     0.935

> <i_qp_HumanOralAbsorption>
1

> <r_qp_PercentHumanOralAbsorption>
   100.000

> <r_qp_SAfluorine>
     0.000

> <r_qp_SAamideO>
     0.000

> <r_qp_PSA>
    60.032

> <i_qp_#NandO>
4

> <i_qp_RuleOfFive>
0

> <i_qp_RuleOfThree>
1

> <i_qp_#ringatoms>
20

> <i_qp_#in34>
0

> <i_qp_#in56>
20

> <i_qp_#noncon>
6

> <i_qp_#nonHatm>
25

> <r_qp_Jm>
0.00174901313001042

> <s_m_subgroupid>
1000_str-imp1->adme_1000-out12

> <s_m_subgroup_title>
1000_str->adme_1000-out1

> <b_m_subgroup_collapsed>
0

$$$$
ind_1,31539
                    3D
 Structure written by MMmdl.
 52 54  0  0  1  0            999 V2000
   -3.6968    1.5009   -0.3125 C   0  0  0  0  0  0
   -2.5128    0.7551   -0.3047 C   0  0  0  0  0  0
   -1.2630    1.2973   -0.7175 C   0  0  0  0  0  0
   -1.2261    2.6336   -1.1546 C   0  0  0  0  0  0
   -2.4033    3.3790   -1.1656 C   0  0  0  0  0  0
   -3.6100    2.8217   -0.7524 C   0  0  0  0  0  0
   -0.2679    0.2598   -0.5660 C   0  0  0  0  0  0
   -0.9452   -0.8852   -0.1123 C   0  0  0  0  0  0
   -2.2687   -0.5467    0.0649 N   0  0  0  0  0  0
   -0.4517   -2.1938    0.2684 C   0  0  0  0  0  0
    0.7804   -2.4870   -0.1867 N   0  0  0  0  0  0
   -1.1333   -2.9679    0.9444 O   0  0  0  0  0  0
    1.5329   -3.7124    0.0807 C   0  0  0  0  0  0
    2.6760   -3.9463   -0.9364 C   0  0  0  0  0  0
    3.5037   -5.2161   -0.6570 C   0  0  0  0  0  0
    4.0048   -5.2753    0.7951 C   0  0  0  0  0  0
    2.8404   -5.1516    1.7907 C   0  0  0  0  0  0
    1.9979   -3.8830    1.5518 C   0  0  0  0  0  0
   -4.6401    1.0810    0.0046 H   0  0  0  0  0  0
   -0.2983    3.0818   -1.4784 H   0  0  0  0  0  0
   -2.3798    4.4061   -1.4998 H   0  0  0  0  0  0
   -4.5032    3.4288   -0.7742 H   0  0  0  0  0  0
   -2.9415   -1.2118    0.4187 H   0  0  0  0  0  0
    1.2838   -1.7579   -0.6720 H   0  0  0  0  0  0
    0.8411   -4.5393   -0.0996 H   0  0  0  0  0  0
    2.2754   -3.9933   -1.9502 H   0  0  0  0  0  0
    3.3556   -3.0928   -0.9041 H   0  0  0  0  0  0
    2.8943   -6.0968   -0.8653 H   0  0  0  0  0  0
    4.3499   -5.2645   -1.3437 H   0  0  0  0  0  0
    4.5420   -6.2090    0.9658 H   0  0  0  0  0  0
    4.7231   -4.4726    0.9689 H   0  0  0  0  0  0
    2.1991   -6.0305    1.7064 H   0  0  0  0  0  0
    3.2239   -5.1546    2.8118 H   0  0  0  0  0  0
    2.6045   -3.0196    1.8307 H   0  0  0  0  0  0
    1.1396   -3.8954    2.2248 H   0  0  0  0  0  0
    3.7291    0.6032   -1.4869 C   0  0  0  0  0  0
    3.1821    1.2239   -0.3199 O   0  0  0  0  0  0
    1.8328    1.0631   -0.0618 C   0  0  0  0  0  0
    1.0632    0.3789   -0.8322 N   0  0  0  0  0  0
    1.4554    1.7682    1.2592 C   0  0  0  0  0  0
    1.7764    3.2759    1.1969 C   0  0  0  0  0  0
    2.1502    1.0829    2.4532 C   0  0  0  0  0  0
    4.7974    0.8139   -1.5348 H   0  0  0  0  0  0
    3.2789    0.9905   -2.4031 H   0  0  0  0  0  0
    3.6126   -0.4825   -1.4654 H   0  0  0  0  0  0
    0.3853    1.6914    1.4486 H   0  0  0  0  0  0
    1.2529    3.7644    0.3740 H   0  0  0  0  0  0
    2.8436    3.4639    1.0699 H   0  0  0  0  0  0
    1.4670    3.7769    2.1147 H   0  0  0  0  0  0
    1.8814    0.0272    2.5197 H   0  0  0  0  0  0
    1.8574    1.5486    3.3949 H   0  0  0  0  0  0
    3.2376    1.1450    2.3855 H   0  0  0  0  0  0
  1  2  2  0  0  0
  1  6  1  0  0  0
  1 19  1  0  0  0
  2  3  1  0  0  0
  2  9  1  0  0  0
  3  4  2  0  0  0
  3  7  1  0  0  0
  4  5  1  0  0  0
  4 20  1  0  0  0
  5  6  2  0  0  0
  5 21  1  0  0  0
  6 22  1  0  0  0
  7  8  2  0  0  0
  7 39  1  0  0  0
  8  9  1  0  0  0
  8 10  1  0  0  0
  9 23  1  0  0  0
 10 11  1  0  0  0
 10 12  2  0  0  0
 11 13  1  0  0  0
 11 24  1  0  0  0
 13 18  1  0  0  0
 13 14  1  0  0  0
 13 25  1  0  0  0
 14 15  1  0  0  0
 14 26  1  0  0  0
 14 27  1  0  0  0
 15 16  1  0  0  0
 15 28  1  0  0  0
 15 29  1  0  0  0
 16 17  1  0  0  0
 16 30  1  0  0  0
 16 31  1  0  0  0
 17 18  1  0  0  0
 17 32  1  0  0  0
 17 33  1  0  0  0
 18 34  1  0  0  0
 18 35  1  0  0  0
 36 37  1  0  0  0
 36 43  1  0  0  0
 36 44  1  0  0  0
 36 45  1  0  0  0
 37 38  1  0  0  0
 38 39  2  0  0  0
 38 40  1  0  0  0
 40 41  1  0  0  0
 40 42  1  0  0  0
 40 46  1  0  0  0
 41 47  1  0  0  0
 41 48  1  0  0  0
 41 49  1  0  0  0
 42 50  1  0  0  0
 42 51  1  0  0  0
 42 52  1  0  0  0
M  END
> <s_m_entry_id>
7907

> <s_m_entry_name>
entry

> <i_f3d_flags>
0

> <s_m_job_name>
adme_1000

> <r_psp_Prime_Energy>
-34104.0012994021

> <r_psp_Prime_Solv_GB>
-5191.03097605643

> <r_psp_Prime_Coulomb>
-26470.9020259708

> <r_psp_Prime_vdW>
-4046.34582736846

> <r_psp_Prime_Covalent>
4427.62846581496

> <i_psp_model_num>
0

> <r_psp_Prime_Lipo>
-2176.98316012091

> <s_psp_Prime_Energy_Force_Field>
S-OPLS

> <s_psp_Prime_Energy_Solvent_Model>
VSGB2.1

> <r_psp_Prime_Hbond>
-550.115241712881

> <r_psp_Prime_Packing>
-55.8446424272089

> <r_psp_Prime_SelfCont>
-40.4078915603482

> <r_psp_Memb1_x>
103.457542316003

> <r_psp_Memb1_y>
39.4731108300965

> <r_psp_Memb1_z>
48.7987221124676

> <r_psp_Memb2_x>
99.8134167309003

> <r_psp_Memb2_y>
2.81176945184187

> <r_psp_Memb2_z>
23.8404289603493

> <r_psp_MembDummyRadius>
4.45

> <r_psp_Prime_Bond_Covalent>
467.241689774694

> <r_psp_Prime_Bond_SGB>
49978.8215248099

> <r_psp_Prime_Angle_Covalent>
2226.43578734737

> <r_psp_Prime_Angle_SGB>
-21656.9631811897

> <r_psp_Prime_Torsion_Covalent>
1733.9509886929

> <r_psp_Prime_NB14_LJ>
4247.47538520293

> <r_psp_Prime_NB14_Lipo>
0

> <r_psp_Prime_NB14_Elec>
25585.1538411752

> <r_psp_Prime_NB14_SGB>
-15628.0766366135

> <r_psp_Prime_NBShort_LJ>
-7878.97375744444

> <r_psp_Prime_NBShort_Lipo>
-2176.98316012091

> <r_psp_Prime_NBShort_Elec>
-53073.540768134

> <r_psp_Prime_NBShort_SGB>
18027.1235923951

> <r_psp_Prime_NBLong_LJ>
-414.847455126955

> <r_psp_Prime_NBLong_Lipo>
0

> <r_psp_Prime_NBLong_Elec>
1017.48490098804

> <r_psp_Prime_NBLong_SGB>
-1166.76535880162

> <r_psp_Prime_Self_SGB>
-34745.1709166566

> <s_m_Source_Path>
F:\Dekstop_files\DAC4,5\Molecular Systems Desgn and Engineering\supplementary_str

> <s_m_Source_File>
1000_str.mae

> <i_m_Source_File_Index>
831

> <i_lp_mmshare_version>
53156

> <s_epik_input>
W2NIXTFbY0hdW2NIXVtjSF1jKGMxMiljKFxOPUMoXE9bQ0gzXSlbQ0hdKFtDSDNdKVtDSDNdKWMoW25IXTIpQyg9TylbTkhdW0NIXTNbQ0gyXVtDSDJdW0NIMl1bQ0gyXVtDSDJdMw==

> <s_epik_cmdline>
J2VwaWtfcHl0aG9uJywgJy1waHQnLCAnMC4wJywgJy1waCcsICc3LjAnLCAnLXRuJywgJzgnLCAnLW1hJywgJzUwMCcsICctaW1hZScsICc8aW5maWxlLm1hZT4nLCAnLW9tYWUnLCAnPG91dGZpbGUubWFlPic=

> <r_lp_tautomer_probability>
1

> <r_epik_Ionization_Penalty>
  0.0000

> <r_epik_Ionization_Penalty_Charging>
  0.0000

> <r_epik_Ionization_Penalty_Neutral>
  0.0000

> <r_epik_State_Penalty>
  0.0000

> <r_epik_Charging_Adjusted_Penalty>
0

> <i_epik_Tot_Q>
0

> <i_epik_Tot_abs_Q>
0

> <s_lp_Force_Field>
S-OPLS

> <r_lp_Energy>
43.925336

> <b_lp_Chiralities_Consistent>
1

> <s_lp_Variant>
ind_1,31539-1

> <s_i_glide_gridfile>
glide-grid_mmpl3

> <i_i_glide_lignum>
1925

> <i_i_glide_rotatable_bonds>
6

> <r_i_docking_score>
-7.70563326548225

> <r_i_glide_ligand_efficiency>
-0.30822533061929

> <r_i_glide_ligand_efficiency_sa>
-0.901256333130318

> <r_i_glide_ligand_efficiency_ln>
-1.82646600311422

> <r_i_glide_gscore>
-7.70563326548225

> <r_i_glide_evdw>
-39.0954093933105

> <r_i_glide_ecoul>
-0.999249935150146

> <r_i_glide_energy>
-40.0946593284607

> <r_i_glide_einternal>
2.6463930606842

> <r_i_glide_emodel>
-54.0983903762167

> <i_i_glide_confnum>
73

> <i_i_glide_posenum>
241

> <r_i_glide_eff_state_penalty>
0

> <i_rge_num_r_groups>
1

> <r_rge_occupation_R1>
1

> <s_rge_R1>
31539

> <s_rge_R1_s_m_title>
31539

> <s_rge_R1_s_m_entry_id>
17589

> <s_rge_R1_s_m_entry_name>
eMol_BB_r-groups.827

> <s_rge_R1_s_m_smiles>
[*]/N=C(\C(C)C)OC

> <b_rge_R1_b_sd_chiral_flag>
0

> <i_rge_R1_i_sd_version>
0

> <s_rge_R1_s_m_Source_File>
eMol_BB_r-groups-dedup.mae

> <i_rge_R1_i_m_Source_File_Index>
682

> <s_rge_R1_s_m_Source_Path>
/Users/konze/projects/pathfinder/r-groups

> <s_rge_R1_s_sd_Source_Path>
/Users/konze/projects/pathfinder/reactant sets/eMolecules

> <s_rge_R1_s_sd_Source_File>
eMol BB r-groups.mae

> <i_rge_R1_i_sd_Source_File_Index>
827

> <r_rge_R1_r_sd_MW>
101.1469

> <i_rge_R1_i_sd_RB>
2

> <i_rge_R1_i_sd_HeavyAtomCount>
7

> <i_rge_R1_i_sd_HBA>
2

> <i_rge_R1_i_sd_HBD>
1

> <r_rge_R1_r_sd_PSA>
33.08

> <i_rge_R1_i_sd_ChiralCenterCount>
0

> <i_rge_R1_i_sd_ChiralCenterCountAllPossible>
0

> <i_rge_R1_i_sd_RingCount>
0

> <r_rge_R1_r_sd_AlogP>
1.2051

> <s_rge_R1_s_sd_subgroup_title>
eMol BB r-groups

> <s_rge_R1_s_sd_subgroupid>
eMol BB r-groups

> <i_rge_R1_i_sd_subgroup_collapsed>
0

> <s_rge_R1_s_sd_Unique_SMILES_Stereo>
COC(=N[H])C(C)C

> <i_rge_R1_i_sd_canvasUID>
768

> <s_rge_R1_s_canvas_Unique_SMILES_Stereo>
COC(=N\[H])\C(C)C

> <s_psp_Prime_MMGBSA_Input_Structure_Hash>
f1754c681509de3849296da55a03d43a6faea9fff5823b261388f70f

> <i_psp_number_heavy_atoms>
25

> <r_psp_MMGBSA_dG_Bind>
-36.9497938654022

> <r_psp_MMGBSA_dG_Bind_Coulomb>
-4.57204237535916

> <r_psp_MMGBSA_dG_Bind_Covalent>
4.81678979945809

> <r_psp_MMGBSA_dG_Bind_Hbond>
-0.0176366297000641

> <r_psp_MMGBSA_dG_Bind_Lipo>
-24.1787035128586

> <r_psp_MMGBSA_dG_Bind_Packing>
4.9737991503207e-014

> <r_psp_MMGBSA_dG_Bind_SelfCont>
7.105427357601e-015

> <r_psp_MMGBSA_dG_Bind_Solv_GB>
26.4816836321143

> <r_psp_MMGBSA_dG_Bind_vdW>
-39.4798847789716

> <r_psp_Lig_Strain_Energy>
10.4209514243325

> <r_psp_Lig_Strain_Coulomb>
0.408028212477141

> <r_psp_Lig_Strain_Covalent>
4.81699066757115

> <r_psp_Lig_Strain_Hbond>
0

> <r_psp_Lig_Strain_Lipo>
-0.0113010750132743

> <r_psp_Lig_Strain_Packing>
0

> <r_psp_Lig_Strain_SelfCont>
0

> <r_psp_Lig_Strain_Solv_GB>
-0.142886155275193

> <r_psp_Lig_Strain_vdW>
5.3501197745727

> <r_psp_Ligand_Energy>
28.1995351970922

> <r_psp_Ligand_Coulomb>
-7.41416965248022

> <r_psp_Ligand_Covalent>
32.4051501940943

> <r_psp_Ligand_Hbond>
0

> <r_psp_Ligand_Lipo>
-2.27982427056851

> <r_psp_Ligand_Packing>
0

> <r_psp_Ligand_SelfCont>
0

> <r_psp_Ligand_Solv_GB>
-10.9608793259514

> <r_psp_Ligand_vdW>
16.449258251998

> <r_psp_Complex_Energy>
-34104.0012994021

> <r_psp_Complex_Coulomb>
-26470.9020259708

> <r_psp_Complex_Covalent>
4427.62846581496

> <r_psp_Complex_Hbond>
-550.115241712881

> <r_psp_Complex_Lipo>
-2176.98316012091

> <r_psp_Complex_Packing>
-55.8446424272089

> <r_psp_Complex_SelfCont>
-40.4078915603482

> <r_psp_Complex_Solv_GB>
-5191.03097605643

> <r_psp_Complex_vdW>
-4046.34582736846

> <r_psp_Receptor_Energy>
-34095.2510407338

> <r_psp_Receptor_Coulomb>
-26458.915813943

> <r_psp_Receptor_Covalent>
4390.40652582141

> <r_psp_Receptor_Hbond>
-550.097605083181

> <r_psp_Receptor_Lipo>
-2150.52463233748

> <r_psp_Receptor_Packing>
-55.8446424272089

> <r_psp_Receptor_SelfCont>
-40.4078915603482

> <r_psp_Receptor_Solv_GB>
-5206.55178036259

> <r_psp_Receptor_vdW>
-4023.31520084149

> <r_psp_MMGBSA_dG_Bind(NS)>
-47.3707452896851

> <r_psp_MMGBSA_dG_Bind(NS)_Coulomb>
-4.98007058787334

> <r_psp_MMGBSA_dG_Bind(NS)_Covalent>
-0.000200868112187891

> <r_psp_MMGBSA_dG_Bind(NS)_Hbond>
-0.0176366296998367

> <r_psp_MMGBSA_dG_Bind(NS)_Lipo>
-24.1674024378403

> <r_psp_MMGBSA_dG_Bind(NS)_Packing>
0

> <r_psp_MMGBSA_dG_Bind(NS)_SelfCont>
0

> <r_psp_MMGBSA_dG_Bind(NS)_Solv_GB>
26.624569787391

> <r_psp_MMGBSA_dG_Bind(NS)_vdW>
-44.8300045535489

> <r_psp_Rec_Strain_Energy>
-5.0931703299284e-011

> <r_psp_Rec_Strain_Coulomb>
4.00177668780088e-011

> <r_psp_Rec_Strain_Covalent>
-9.09494701772928e-013

> <r_psp_Rec_Strain_Hbond>
-2.27373675443232e-013

> <r_psp_Rec_Strain_Lipo>
-5.00222085975111e-012

> <r_psp_Rec_Strain_Packing>
4.9737991503207e-014

> <r_psp_Rec_Strain_SelfCont>
7.105427357601e-015

> <r_psp_Rec_Strain_Solv_GB>
-1.81898940354586e-012

> <r_psp_Rec_Strain_vdW>
4.54747350886464e-012

> <r_psp_Prime_MMGBSA_ligand_efficiency>
-1.47799175461609

> <r_psp_Prime_MMGBSA_ligand_efficiency_sa>
-2.21698763192413

> <r_psp_Prime_MMGBSA_ligand_efficiency_ln>
-8.75820844206916

> <r_i_glide_lipo>
-4.20464752002366

> <r_i_glide_hbond>
0

> <r_i_glide_metal>
0

> <r_i_glide_rewards>
-2.371575254938

> <r_i_glide_erotb>
0.975247469417461

> <r_i_glide_esite>
0

> <i_psp_ExecuteFunction_Internal_Entry_Index>
2130

> <s_epik_Chemistry_Notes>
This compound has an imine and may undergo hydrolysis.

> <i_qp_#stars>
0

> <i_qp_#amine>
0

> <i_qp_#amidine>
0

> <i_qp_#acid>
0

> <i_qp_#amide>
0

> <i_qp_#rotor>
5

> <i_qp_#rtvFG>
1

> <i_qp_CNS>
0

> <r_qp_mol_MW>
   341.452

> <r_qp_dipole>
     3.668

> <r_qp_SASA>
   632.769

> <r_qp_FOSA>
   403.416

> <r_qp_FISA>
    69.295

> <r_qp_PISA>
   160.058

> <r_qp_WPSA>
     0.000

> <r_qp_volume>
  1158.986

> <r_qp_donorHB>
     2.000

> <r_qp_accptHB>
     3.500

> <r_qp_dip^2/V>
   0.0116080

> <r_qp_ACxDN^.5/SA>
   0.0078224

> <r_qp_glob>
   0.8432797

> <r_qp_QPpolrz>
    38.547

> <r_qp_QPlogPC16>
    11.062

> <r_qp_QPlogPoct>
    17.236

> <r_qp_QPlogPw>
     8.076

> <r_qp_QPlogPo/w>
     4.607

> <r_qp_QPlogS>
    -5.540

> <r_qp_CIQPlogS>
    -5.155

> <r_qp_QPlogHERG>
    -4.831

> <r_qp_QPPCaco>
  2181.589

> <r_qp_QPlogBB>
    -0.387

> <r_qp_QPPMDCK>
  1149.538

> <r_qp_QPlogKp>
    -1.753

> <r_qp_IP(eV)>
     8.133

> <r_qp_EA(eV)>
     0.470

> <i_qp_#metab>
1

> <r_qp_QPlogKhsa>
     0.804

> <i_qp_HumanOralAbsorption>
3

> <r_qp_PercentHumanOralAbsorption>
   100.000

> <r_qp_SAfluorine>
     0.000

> <r_qp_SAamideO>
     0.000

> <r_qp_PSA>
    71.505

> <i_qp_#NandO>
5

> <i_qp_RuleOfFive>
0

> <i_qp_RuleOfThree>
0

> <i_qp_#ringatoms>
15

> <i_qp_#in34>
0

> <i_qp_#in56>
15

> <i_qp_#noncon>
6

> <i_qp_#nonHatm>
25

> <r_qp_Jm>
0.0173901755353413

> <s_m_subgroupid>
1000_str-imp1->adme_1000-out12

> <s_m_subgroup_title>
1000_str->adme_1000-out1

> <b_m_subgroup_collapsed>
0

$$$$
ind_1,31539
                    3D
 Structure written by MMmdl.
 52 54  0  0  1  0            999 V2000
    1.6377    2.2394   -5.0011 C   0  0  0  0  0  0
    2.0019    1.7831   -3.7295 C   0  0  0  0  0  0
    1.2954    0.7489   -3.0541 C   0  0  0  0  0  0
    0.1865    0.1695   -3.6950 C   0  0  0  0  0  0
   -0.1803    0.6206   -4.9618 C   0  0  0  0  0  0
    0.5323    1.6331   -5.5978 C   0  0  0  0  0  0
    1.9344    0.5387   -1.7797 C   0  0  0  0  0  0
    3.0098    1.4341   -1.7199 C   0  0  0  0  0  0
    3.0151    2.1709   -2.8867 N   0  0  0  0  0  0
    3.9252    1.6788   -0.6234 C   0  0  0  0  0  0
    5.0468    2.3501   -0.9558 N   0  0  0  0  0  0
    3.6810    1.2879    0.5190 O   0  0  0  0  0  0
    6.1117    2.7490   -0.0332 C   0  0  0  0  0  0
    7.4524    3.0414   -0.7496 C   0  0  0  0  0  0
    8.5790    3.4919    0.2010 C   0  0  0  0  0  0
    8.1445    4.6540    1.1083 C   0  0  0  0  0  0
    6.8742    4.2986    1.8976 C   0  0  0  0  0  0
    5.7172    3.8576    0.9793 C   0  0  0  0  0  0
    2.1801    3.0261   -5.5046 H   0  0  0  0  0  0
   -0.3806   -0.6141   -3.2144 H   0  0  0  0  0  0
   -1.0321    0.1784   -5.4577 H   0  0  0  0  0  0
    0.2195    1.9591   -6.5791 H   0  0  0  0  0  0
    3.6933    2.8996   -3.0543 H   0  0  0  0  0  0
    5.1410    2.6809   -1.9043 H   0  0  0  0  0  0
    6.3267    1.8703    0.5807 H   0  0  0  0  0  0
    7.7820    2.1625   -1.3059 H   0  0  0  0  0  0
    7.2951    3.8374   -1.4791 H   0  0  0  0  0  0
    8.8897    2.6476    0.8185 H   0  0  0  0  0  0
    9.4569    3.7818   -0.3777 H   0  0  0  0  0  0
    8.9505    4.9096    1.7971 H   0  0  0  0  0  0
    7.9645    5.5445    0.5041 H   0  0  0  0  0  0
    7.0998    3.4964    2.6019 H   0  0  0  0  0  0
    6.5625    5.1517    2.5016 H   0  0  0  0  0  0
    5.3765    4.7341    0.4257 H   0  0  0  0  0  0
    4.8799    3.5305    1.5974 H   0  0  0  0  0  0
    0.5245    3.3156    0.1034 C   0  0  0  0  0  0
    0.0384    2.1058   -0.4760 O   0  0  0  0  0  0
   -0.2204    1.0813    0.3769 C   0  0  0  0  0  0
   -1.2025    1.4025    1.2871 N   0  0  0  0  0  0
    0.4013   -0.1208    0.2849 C   0  0  0  0  0  0
    1.4791   -0.4813   -0.7448 C   0  0  0  0  0  0
    0.0873   -1.2788    1.2281 C   0  0  0  0  0  0
    0.8147    4.0002   -0.6934 H   0  0  0  0  0  0
    1.4059    3.1375    0.7220 H   0  0  0  0  0  0
   -0.2340    3.8162    0.7068 H   0  0  0  0  0  0
   -1.5114    0.7342    1.9778 H   0  0  0  0  0  0
    1.1306   -1.3717   -1.2698 H   0  0  0  0  0  0
    2.3458   -0.8292   -0.1820 H   0  0  0  0  0  0
    0.9827   -1.5710    1.7777 H   0  0  0  0  0  0
   -0.2665   -2.1410    0.6620 H   0  0  0  0  0  0
   -0.6798   -1.0367    1.9634 H   0  0  0  0  0  0
   -1.6422    2.3113    1.2798 H   0  0  0  0  0  0
  1  2  2  0  0  0
  1  6  1  0  0  0
  1 19  1  0  0  0
  2  3  1  0  0  0
  2  9  1  0  0  0
  3  4  2  0  0  0
  3  7  1  0  0  0
  4  5  1  0  0  0
  4 20  1  0  0  0
  5  6  2  0  0  0
  5 21  1  0  0  0
  6 22  1  0  0  0
  7  8  2  0  0  0
  7 41  1  0  0  0
  8  9  1  0  0  0
  8 10  1  0  0  0
  9 23  1  0  0  0
 10 11  1  0  0  0
 10 12  2  0  0  0
 11 13  1  0  0  0
 11 24  1  0  0  0
 13 18  1  0  0  0
 13 14  1  0  0  0
 13 25  1  0  0  0
 14 15  1  0  0  0
 14 26  1  0  0  0
 14 27  1  0  0  0
 15 16  1  0  0  0
 15 28  1  0  0  0
 15 29  1  0  0  0
 16 17  1  0  0  0
 16 30  1  0  0  0
 16 31  1  0  0  0
 17 18  1  0  0  0
 17 32  1  0  0  0
 17 33  1  0  0  0
 18 34  1  0  0  0
 18 35  1  0  0  0
 36 37  1  0  0  0
 36 43  1  0  0  0
 36 44  1  0  0  0
 36 45  1  0  0  0
 37 38  1  0  0  0
 38 39  1  0  0  0
 38 40  2  0  0  0
 39 46  1  0  0  0
 39 52  1  0  0  0
 40 41  1  0  0  0
 40 42  1  0  0  0
 41 47  1  0  0  0
 41 48  1  0  0  0
 42 49  1  0  0  0
 42 50  1  0  0  0
 42 51  1  0  0  0
M  END
> <s_m_entry_id>
7750

> <s_m_entry_name>
entry

> <i_f3d_flags>
0

> <s_m_job_name>
adme_1000

> <r_psp_Prime_Energy>
-34157.338886034

> <r_psp_Prime_Solv_GB>
-5183.62963492622

> <r_psp_Prime_Coulomb>
-26506.8791540598

> <r_psp_Prime_vdW>
-4060.97107611122

> <r_psp_Prime_Covalent>
4417.22633391144

> <i_psp_model_num>
0

> <r_psp_Prime_Lipo>
-2176.73294205546

> <s_psp_Prime_Energy_Force_Field>
S-OPLS

> <s_psp_Prime_Energy_Solvent_Model>
VSGB2.1

> <r_psp_Prime_Hbond>
-550.099878805188

> <r_psp_Prime_Packing>
-55.8446424272089

> <r_psp_Prime_SelfCont>
-40.4078915603482

> <r_psp_Memb1_x>
103.457542316003

> <r_psp_Memb1_y>
39.4731108300965

> <r_psp_Memb1_z>
48.7987221124676

> <r_psp_Memb2_x>
99.8134167309003

> <r_psp_Memb2_y>
2.81176945184187

> <r_psp_Memb2_z>
23.8404289603493

> <r_psp_MembDummyRadius>
4.45

> <r_psp_Prime_Bond_Covalent>
467.520205863665

> <r_psp_Prime_Bond_SGB>
49981.3701840552

> <r_psp_Prime_Angle_Covalent>
2223.39618017325

> <r_psp_Prime_Angle_SGB>
-21665.4311193667

> <r_psp_Prime_Torsion_Covalent>
1726.30994787453

> <r_psp_Prime_NB14_LJ>
4241.08582167771

> <r_psp_Prime_NB14_Lipo>
0

> <r_psp_Prime_NB14_Elec>
25545.6767745125

> <r_psp_Prime_NB14_SGB>
-15618.5876509062

> <r_psp_Prime_NBShort_LJ>
-7886.66570594615

> <r_psp_Prime_NBShort_Lipo>
-2176.73294205546

> <r_psp_Prime_NBShort_Elec>
-53070.7446189425

> <r_psp_Prime_NBShort_SGB>
18024.888303063

> <r_psp_Prime_NBLong_LJ>
-415.391191842779

> <r_psp_Prime_NBLong_Lipo>
0

> <r_psp_Prime_NBLong_Elec>
1018.18869037014

> <r_psp_Prime_NBLong_SGB>
-1159.31171960795

> <r_psp_Prime_Self_SGB>
-34746.5576321636

> <s_m_Source_Path>
F:\Dekstop_files\DAC4,5\Molecular Systems Desgn and Engineering\supplementary_str

> <s_m_Source_File>
1000_str.mae

> <i_m_Source_File_Index>
674

> <i_lp_mmshare_version>
53156

> <s_epik_input>
W2NIXTFbY0hdW2NIXVtjSF1jKGMxMiljKFtDSDJdL0MoW0NIM10pPUMoW05IMl0pXE9bQ0gzXSljKFtuSF0yKUMoPU8pW05IXVtDSF0zW0NIMl1bQ0gyXVtDSDJdW0NIMl1bQ0gyXTM=

> <s_epik_cmdline>
J2VwaWtfcHl0aG9uJywgJy1waHQnLCAnMC4wJywgJy1waCcsICc3LjAnLCAnLXRuJywgJzgnLCAnLW1hJywgJzUwMCcsICctaW1hZScsICc8aW5maWxlLm1hZT4nLCAnLW9tYWUnLCAnPG91dGZpbGUubWFlPic=

> <r_lp_tautomer_probability>
1

> <r_epik_Ionization_Penalty>
  0.0000

> <r_epik_Ionization_Penalty_Charging>
  0.0000

> <r_epik_Ionization_Penalty_Neutral>
  0.0000

> <r_epik_State_Penalty>
  0.0000

> <r_epik_Charging_Adjusted_Penalty>
4.1813164340007e-012

> <i_epik_Tot_Q>
0

> <i_epik_Tot_abs_Q>
0

> <s_lp_Force_Field>
S-OPLS

> <r_lp_Energy>
31.856666

> <b_lp_Chiralities_Consistent>
1

> <s_lp_Variant>
ind_1,31539-1

> <s_i_glide_gridfile>
glide-grid_mmpl3

> <i_i_glide_lignum>
1926

> <i_i_glide_rotatable_bonds>
6

> <r_i_docking_score>
-7.57800751781312

> <r_i_glide_ligand_efficiency>
-0.303120300712525

> <r_i_glide_ligand_efficiency_sa>
-0.886329135144847

> <r_i_glide_ligand_efficiency_ln>
-1.79621487628161

> <r_i_glide_gscore>
-7.57800751781312

> <r_i_glide_evdw>
-42.235538482666

> <r_i_glide_ecoul>
-0.913758635520935

> <r_i_glide_energy>
-43.149297118187

> <r_i_glide_einternal>
7.13312244415283

> <r_i_glide_emodel>
-58.1432373781585

> <i_i_glide_confnum>
64

> <i_i_glide_posenum>
243

> <r_i_glide_eff_state_penalty>
0

> <i_rge_num_r_groups>
1

> <r_rge_occupation_R1>
1

> <s_rge_R1>
31539

> <s_rge_R1_s_m_title>
31539

> <s_rge_R1_s_m_entry_id>
17590

> <s_rge_R1_s_m_entry_name>
eMol_BB_r-groups.827

> <s_rge_R1_s_m_smiles>
[*]CC(C)/C(=N\[H])OC

> <b_rge_R1_b_sd_chiral_flag>
0

> <i_rge_R1_i_sd_version>
0

> <s_rge_R1_s_m_Source_File>
eMol_BB_r-groups-dedup.mae

> <i_rge_R1_i_m_Source_File_Index>
682

> <s_rge_R1_s_m_Source_Path>
/Users/konze/projects/pathfinder/r-groups

> <s_rge_R1_s_sd_Source_Path>
/Users/konze/projects/pathfinder/reactant sets/eMolecules

> <s_rge_R1_s_sd_Source_File>
eMol BB r-groups.mae

> <i_rge_R1_i_sd_Source_File_Index>
827

> <r_rge_R1_r_sd_MW>
101.1469

> <i_rge_R1_i_sd_RB>
2

> <i_rge_R1_i_sd_HeavyAtomCount>
7

> <i_rge_R1_i_sd_HBA>
2

> <i_rge_R1_i_sd_HBD>
1

> <r_rge_R1_r_sd_PSA>
33.08

> <i_rge_R1_i_sd_ChiralCenterCount>
0

> <i_rge_R1_i_sd_ChiralCenterCountAllPossible>
0

> <i_rge_R1_i_sd_RingCount>
0

> <r_rge_R1_r_sd_AlogP>
1.2051

> <s_rge_R1_s_sd_subgroup_title>
eMol BB r-groups

> <s_rge_R1_s_sd_subgroupid>
eMol BB r-groups

> <i_rge_R1_i_sd_subgroup_collapsed>
0

> <s_rge_R1_s_sd_Unique_SMILES_Stereo>
COC(=N[H])C(C)C

> <i_rge_R1_i_sd_canvasUID>
768

> <s_rge_R1_s_canvas_Unique_SMILES_Stereo>
COC(=N\[H])\C(C)C

> <s_psp_Prime_MMGBSA_Input_Structure_Hash>
da401f3c14cdd6847b47ce8b9ccc2073fdfc17f0fdd52af28eee7389

> <i_psp_number_heavy_atoms>
25

> <r_psp_MMGBSA_dG_Bind>
-45.1887160412953

> <r_psp_MMGBSA_dG_Bind_Coulomb>
-5.80853862339063

> <r_psp_MMGBSA_dG_Bind_Covalent>
3.4561230136278

> <r_psp_MMGBSA_dG_Bind_Hbond>
-0.00227372200731679

> <r_psp_MMGBSA_dG_Bind_Lipo>
-24.1044920559875

> <r_psp_MMGBSA_dG_Bind_Packing>
4.9737991503207e-014

> <r_psp_MMGBSA_dG_Bind_SelfCont>
7.105427357601e-015

> <r_psp_MMGBSA_dG_Bind_Solv_GB>
32.3718022532421

> <r_psp_MMGBSA_dG_Bind_vdW>
-51.1013369066864

> <r_psp_Lig_Strain_Energy>
5.33745913969457

> <r_psp_Lig_Strain_Coulomb>
0.132635899996643

> <r_psp_Lig_Strain_Covalent>
3.45632388174044

> <r_psp_Lig_Strain_Hbond>
0

> <r_psp_Lig_Strain_Lipo>
0.120148770022346

> <r_psp_Lig_Strain_Packing>
0

> <r_psp_Lig_Strain_SelfCont>
0

> <r_psp_Lig_Strain_Solv_GB>
-0.227398961202795

> <r_psp_Lig_Strain_vdW>
1.85574954913794

> <r_psp_Ligand_Energy>
-16.8991292589142

> <r_psp_Ligand_Coulomb>
-42.1548014934083

> <r_psp_Ligand_Covalent>
23.363685076401

> <r_psp_Ligand_Hbond>
0

> <r_psp_Ligand_Lipo>
-2.10381766198934

> <r_psp_Ligand_Packing>
0

> <r_psp_Ligand_SelfCont>
0

> <r_psp_Ligand_Solv_GB>
-9.44965681687546

> <r_psp_Ligand_vdW>
13.445461636958

> <r_psp_Complex_Energy>
-34157.338886034

> <r_psp_Complex_Coulomb>
-26506.8791540598

> <r_psp_Complex_Covalent>
4417.22633391144

> <r_psp_Complex_Hbond>
-550.099878805188

> <r_psp_Complex_Lipo>
-2176.73294205546

> <r_psp_Complex_Packing>
-55.8446424272089

> <r_psp_Complex_SelfCont>
-40.4078915603482

> <r_psp_Complex_Solv_GB>
-5183.62963492622

> <r_psp_Complex_vdW>
-4060.97107611122

> <r_psp_Receptor_Energy>
-34095.2510407338

> <r_psp_Receptor_Coulomb>
-26458.915813943

> <r_psp_Receptor_Covalent>
4390.40652582141

> <r_psp_Receptor_Hbond>
-550.097605083181

> <r_psp_Receptor_Lipo>
-2150.52463233748

> <r_psp_Receptor_Packing>
-55.8446424272089

> <r_psp_Receptor_SelfCont>
-40.4078915603482

> <r_psp_Receptor_Solv_GB>
-5206.55178036259

> <r_psp_Receptor_vdW>
-4023.31520084149

> <r_psp_MMGBSA_dG_Bind(NS)>
-50.5261751809376

> <r_psp_MMGBSA_dG_Bind(NS)_Coulomb>
-5.94117452342834

> <r_psp_MMGBSA_dG_Bind(NS)_Covalent>
-0.000200868112187891

> <r_psp_MMGBSA_dG_Bind(NS)_Hbond>
-0.00227372200708942

> <r_psp_MMGBSA_dG_Bind(NS)_Lipo>
-24.2246408260053

> <r_psp_MMGBSA_dG_Bind(NS)_Packing>
0

> <r_psp_MMGBSA_dG_Bind(NS)_SelfCont>
0

> <r_psp_MMGBSA_dG_Bind(NS)_Solv_GB>
32.599201214447

> <r_psp_MMGBSA_dG_Bind(NS)_vdW>
-52.9570864558286

> <r_psp_Rec_Strain_Energy>
-5.0931703299284e-011

> <r_psp_Rec_Strain_Coulomb>
4.00177668780088e-011

> <r_psp_Rec_Strain_Covalent>
-9.09494701772928e-013

> <r_psp_Rec_Strain_Hbond>
-2.27373675443232e-013

> <r_psp_Rec_Strain_Lipo>
-5.00222085975111e-012

> <r_psp_Rec_Strain_Packing>
4.9737991503207e-014

> <r_psp_Rec_Strain_SelfCont>
7.105427357601e-015

> <r_psp_Rec_Strain_Solv_GB>
-1.81898940354586e-012

> <r_psp_Rec_Strain_vdW>
4.54747350886464e-012

> <r_psp_Prime_MMGBSA_ligand_efficiency>
-1.80754864165181

> <r_psp_Prime_MMGBSA_ligand_efficiency_sa>
-2.71132296247772

> <r_psp_Prime_MMGBSA_ligand_efficiency_ln>
-10.7110798983298

> <r_i_glide_lipo>
-4.37538258222963

> <r_i_glide_hbond>
0

> <r_i_glide_metal>
0

> <r_i_glide_rewards>
-1.92903168553951

> <r_i_glide_erotb>
0.975247469417461

> <r_i_glide_esite>
0

> <i_psp_ExecuteFunction_Internal_Entry_Index>
2224

> <s_epik_Chemistry_Notes>
This compound has an imine and may undergo hydrolysis.

> <i_qp_#stars>
1

> <i_qp_#amine>
0

> <i_qp_#amidine>
0

> <i_qp_#acid>
0

> <i_qp_#amide>
0

> <i_qp_#rotor>
6

> <i_qp_#rtvFG>
0

> <i_qp_CNS>
-1

> <r_qp_mol_MW>
   341.452

> <r_qp_dipole>
     4.525

> <r_qp_SASA>
   636.528

> <r_qp_FOSA>
   387.855

> <r_qp_FISA>
    82.752

> <r_qp_PISA>
   165.921

> <r_qp_WPSA>
     0.000

> <r_qp_volume>
  1148.799

> <r_qp_donorHB>
     4.000

> <r_qp_accptHB>
     3.000

> <r_qp_dip^2/V>
   0.0178208

> <r_qp_ACxDN^.5/SA>
   0.0094261

> <r_qp_glob>
   0.8333802

> <r_qp_QPpolrz>
    37.553

> <r_qp_QPlogPC16>
    11.549

> <r_qp_QPlogPoct>
    19.613

> <r_qp_QPlogPw>
    10.433

> <r_qp_QPlogPo/w>
     4.169

> <r_qp_QPlogS>
    -5.068

> <r_qp_CIQPlogS>
    -5.050

> <r_qp_QPlogHERG>
    -5.019

> <r_qp_QPPCaco>
  1626.144

> <r_qp_QPlogBB>
    -0.592

> <r_qp_QPPMDCK>
   836.735

> <r_qp_QPlogKp>
    -1.884

> <r_qp_IP(eV)>
     7.604

> <r_qp_EA(eV)>
     0.179

> <i_qp_#metab>
3

> <r_qp_QPlogKhsa>
     0.565

> <i_qp_HumanOralAbsorption>
3

> <r_qp_PercentHumanOralAbsorption>
   100.000

> <r_qp_SAfluorine>
     0.000

> <r_qp_SAamideO>
     0.000

> <r_qp_PSA>
    75.213

> <i_qp_#NandO>
5

> <i_qp_RuleOfFive>
0

> <i_qp_RuleOfThree>
0

> <i_qp_#ringatoms>
15

> <i_qp_#in34>
0

> <i_qp_#in56>
15

> <i_qp_#noncon>
6

> <i_qp_#nonHatm>
25

> <r_qp_Jm>
0.0381595914988335

> <s_m_subgroupid>
1000_str-imp1->adme_1000-out12

> <s_m_subgroup_title>
1000_str->adme_1000-out1

> <b_m_subgroup_collapsed>
0

$$$$
ind_1,34694
                    3D
 Structure written by MMmdl.
 50 53  0  0  1  0            999 V2000
   -3.3287    1.6782   -0.2502 C   0  0  0  0  0  0
   -2.2525    0.7847   -0.2141 C   0  0  0  0  0  0
   -0.9010    1.2134   -0.0919 C   0  0  0  0  0  0
   -0.6467    2.5945   -0.0118 C   0  0  0  0  0  0
   -1.7151    3.4887   -0.0454 C   0  0  0  0  0  0
   -3.0263    3.0366   -0.1616 C   0  0  0  0  0  0
   -0.0626    0.0391   -0.0872 C   0  0  0  0  0  0
   -0.9237   -1.0620   -0.2033 C   0  0  0  0  0  0
   -2.2159   -0.5858   -0.2892 N   0  0  0  0  0  0
   -0.5965   -2.4699   -0.3173 C   0  0  0  0  0  0
   -1.6072   -3.3141   -0.0250 N   0  0  0  0  0  0
    0.5295   -2.8473   -0.6434 O   0  0  0  0  0  0
   -1.5453   -4.7762   -0.0780 C   0  0  0  0  0  0
   -2.6691   -5.4578    0.7402 C   0  0  0  0  0  0
   -2.6385   -6.9976    0.6748 C   0  0  0  0  0  0
   -2.5792   -7.5178   -0.7703 C   0  0  0  0  0  0
   -1.3846   -6.9169   -1.5279 C   0  0  0  0  0  0
   -1.3902   -5.3757   -1.5019 C   0  0  0  0  0  0
   -4.3505    1.3408   -0.3445 H   0  0  0  0  0  0
    0.3638    2.9656    0.0763 H   0  0  0  0  0  0
   -1.5234    4.5499    0.0185 H   0  0  0  0  0  0
   -3.8303    3.7577   -0.1867 H   0  0  0  0  0  0
   -3.0056   -1.2049   -0.4002 H   0  0  0  0  0  0
   -2.5128   -2.9203    0.1817 H   0  0  0  0  0  0
   -0.6280   -5.0573    0.4462 H   0  0  0  0  0  0
   -2.6209   -5.1413    1.7833 H   0  0  0  0  0  0
   -3.6350   -5.1284    0.3535 H   0  0  0  0  0  0
   -1.7717   -7.3651    1.2264 H   0  0  0  0  0  0
   -3.5140   -7.4069    1.1805 H   0  0  0  0  0  0
   -2.5106   -8.6062   -0.7711 H   0  0  0  0  0  0
   -3.5066   -7.2691   -1.2891 H   0  0  0  0  0  0
   -0.4565   -7.2808   -1.0843 H   0  0  0  0  0  0
   -1.3844   -7.2701   -2.5600 H   0  0  0  0  0  0
   -2.2224   -5.0332   -2.1190 H   0  0  0  0  0  0
   -0.4770   -5.0113   -1.9741 H   0  0  0  0  0  0
    1.4595    0.0645    0.0285 C   0  0  0  0  0  0
    2.0016   -0.0999    1.4826 C   0  0  0  0  0  0
    1.6187   -1.3654    1.9859 O   0  0  0  0  0  0
    3.4976    0.2559    1.5884 C   0  0  0  0  0  0
    3.0992    1.6902    1.9699 C   0  0  0  0  0  0
    1.7404    1.1152    2.3955 C   0  0  0  0  0  0
    1.9012   -0.7118   -0.5958 H   0  0  0  0  0  0
    1.8339    0.9895   -0.4116 H   0  0  0  0  0  0
    1.9733   -1.4598    2.8726 H   0  0  0  0  0  0
    4.0117   -0.2873    2.3843 H   0  0  0  0  0  0
    4.0836    0.1192    0.6786 H   0  0  0  0  0  0
    3.6872    2.1466    2.7668 H   0  0  0  0  0  0
    3.0413    2.3731    1.1204 H   0  0  0  0  0  0
    0.8509    1.7036    2.1755 H   0  0  0  0  0  0
    1.6851    0.8485    3.4531 H   0  0  0  0  0  0
  1  2  2  0  0  0
  1  6  1  0  0  0
  1 19  1  0  0  0
  2  3  1  0  0  0
  2  9  1  0  0  0
  3  4  2  0  0  0
  3  7  1  0  0  0
  4  5  1  0  0  0
  4 20  1  0  0  0
  5  6  2  0  0  0
  5 21  1  0  0  0
  6 22  1  0  0  0
  7  8  2  0  0  0
  7 36  1  0  0  0
  8  9  1  0  0  0
  8 10  1  0  0  0
  9 23  1  0  0  0
 10 11  1  0  0  0
 10 12  2  0  0  0
 11 13  1  0  0  0
 11 24  1  0  0  0
 13 18  1  0  0  0
 13 14  1  0  0  0
 13 25  1  0  0  0
 14 15  1  0  0  0
 14 26  1  0  0  0
 14 27  1  0  0  0
 15 16  1  0  0  0
 15 28  1  0  0  0
 15 29  1  0  0  0
 16 17  1  0  0  0
 16 30  1  0  0  0
 16 31  1  0  0  0
 17 18  1  0  0  0
 17 32  1  0  0  0
 17 33  1  0  0  0
 18 34  1  0  0  0
 18 35  1  0  0  0
 36 37  1  0  0  0
 36 42  1  0  0  0
 36 43  1  0  0  0
 37 41  1  0  0  0
 37 38  1  0  0  0
 37 39  1  0  0  0
 38 44  1  0  0  0
 39 40  1  0  0  0
 39 45  1  0  0  0
 39 46  1  0  0  0
 40 41  1  0  0  0
 40 47  1  0  0  0
 40 48  1  0  0  0
 41 49  1  0  0  0
 41 50  1  0  0  0
M  END
> <s_m_entry_id>
7727

> <s_m_entry_name>
entry

> <i_f3d_flags>
0

> <s_m_job_name>
adme_1000

> <r_psp_Prime_Energy>
-34116.66517571

> <r_psp_Prime_Solv_GB>
-5198.88661892253

> <r_psp_Prime_Coulomb>
-26482.2464482875

> <r_psp_Prime_vdW>
-4045.00462853139

> <r_psp_Prime_Covalent>
4438.25029182309

> <i_psp_model_num>
0

> <r_psp_Prime_Lipo>
-2179.10723653864

> <s_psp_Prime_Energy_Force_Field>
S-OPLS

> <s_psp_Prime_Energy_Solvent_Model>
VSGB2.1

> <r_psp_Prime_Hbond>
-551.133635842524

> <r_psp_Prime_Packing>
-58.1290078501121

> <r_psp_Prime_SelfCont>
-40.4078915603482

> <r_psp_Memb1_x>
103.457542316003

> <r_psp_Memb1_y>
39.4731108300965

> <r_psp_Memb1_z>
48.7987221124676

> <r_psp_Memb2_x>
99.8134167309003

> <r_psp_Memb2_y>
2.81176945184187

> <r_psp_Memb2_z>
23.8404289603493

> <r_psp_MembDummyRadius>
4.45

> <r_psp_Prime_Bond_Covalent>
466.91324828385

> <r_psp_Prime_Bond_SGB>
49966.1838288541

> <r_psp_Prime_Angle_Covalent>
2227.258936219

> <r_psp_Prime_Angle_SGB>
-21654.6225738876

> <r_psp_Prime_Torsion_Covalent>
1744.07810732024

> <r_psp_Prime_NB14_LJ>
4239.98123986182

> <r_psp_Prime_NB14_Lipo>
0

> <r_psp_Prime_NB14_Elec>
25553.6133989624

> <r_psp_Prime_NB14_SGB>
-15620.5959812473

> <r_psp_Prime_NBShort_LJ>
-7870.06553308557

> <r_psp_Prime_NBShort_Lipo>
-2179.10723653864

> <r_psp_Prime_NBShort_Elec>
-53052.6970279905

> <r_psp_Prime_NBShort_SGB>
18017.3659129889

> <r_psp_Prime_NBLong_LJ>
-414.920335307647

> <r_psp_Prime_NBLong_Lipo>
0

> <r_psp_Prime_NBLong_Elec>
1016.83718074059

> <r_psp_Prime_NBLong_SGB>
-1171.37530889037

> <r_psp_Prime_Self_SGB>
-34735.8424967403

> <s_m_Source_Path>
F:\Dekstop_files\DAC4,5\Molecular Systems Desgn and Engineering\supplementary_str

> <s_m_Source_File>
1000_str.mae

> <i_m_Source_File_Index>
651

> <i_lp_mmshare_version>
53156

> <s_epik_input>
W2NIXTFbY0hdW2NIXVtjSF1jKGMxMiljKFtDSDJdQzMoW09IXSlbQ0gyXVtDSDJdW0NIMl0zKWMoW25IXTIpQyg9TylbTkhdW0NIXTRbQ0gyXVtDSDJdW0NIMl1bQ0gyXVtDSDJdNA==

> <s_epik_cmdline>
J2VwaWtfcHl0aG9uJywgJy1waHQnLCAnMC4wJywgJy1waCcsICc3LjAnLCAnLXRuJywgJzgnLCAnLW1hJywgJzUwMCcsICctaW1hZScsICc8aW5maWxlLm1hZT4nLCAnLW9tYWUnLCAnPG91dGZpbGUubWFlPic=

> <r_lp_tautomer_probability>
1

> <r_epik_Ionization_Penalty>
  0.0000

> <r_epik_Ionization_Penalty_Charging>
  0.0000

> <r_epik_Ionization_Penalty_Neutral>
  0.0000

> <r_epik_State_Penalty>
  0.0000

> <r_epik_Charging_Adjusted_Penalty>
0

> <i_epik_Tot_Q>
0

> <i_epik_Tot_abs_Q>
0

> <s_lp_Force_Field>
S-OPLS

> <r_lp_Energy>
47.324516

> <b_lp_Chiralities_Consistent>
1

> <s_lp_Variant>
ind_1,34694-1

> <s_i_glide_gridfile>
glide-grid_mmpl3

> <i_i_glide_lignum>
1548

> <i_i_glide_rotatable_bonds>
6

> <r_i_docking_score>
-7.44785375911329

> <r_i_glide_ligand_efficiency>
-0.310327239963054

> <r_i_glide_ligand_efficiency_sa>
-0.89513865603453

> <r_i_glide_ligand_efficiency_ln>
-1.78261316429545

> <r_i_glide_gscore>
-7.44785375911329

> <r_i_glide_evdw>
-33.1731338500977

> <r_i_glide_ecoul>
-0.869710803031921

> <r_i_glide_energy>
-34.0428446531296

> <r_i_glide_einternal>
5.9625825881958

> <r_i_glide_emodel>
-46.1303047722036

> <i_i_glide_confnum>
165

> <i_i_glide_posenum>
296

> <r_i_glide_eff_state_penalty>
0

> <i_rge_num_r_groups>
1

> <r_rge_occupation_R1>
1

> <s_rge_R1>
34694

> <s_rge_R1_s_m_title>
34694

> <s_rge_R1_s_m_entry_id>
17271

> <s_rge_R1_s_m_entry_name>
eMol_BB_r-groups.658

> <s_rge_R1_s_m_smiles>
[*]CC1(O)CCC1

> <b_rge_R1_b_sd_chiral_flag>
0

> <i_rge_R1_i_sd_version>
0

> <s_rge_R1_s_m_Source_File>
eMol_BB_r-groups-dedup.mae

> <i_rge_R1_i_m_Source_File_Index>
530

> <s_rge_R1_s_m_Source_Path>
/Users/konze/projects/pathfinder/r-groups

> <s_rge_R1_s_sd_Source_Path>
/Users/konze/projects/pathfinder/reactant sets/eMolecules

> <s_rge_R1_s_sd_Source_File>
eMol BB r-groups.mae

> <i_rge_R1_i_sd_Source_File_Index>
658

> <r_rge_R1_r_sd_MW>
86.1323

> <i_rge_R1_i_sd_RB>
0

> <i_rge_R1_i_sd_HeavyAtomCount>
6

> <i_rge_R1_i_sd_HBA>
1

> <i_rge_R1_i_sd_HBD>
1

> <r_rge_R1_r_sd_PSA>
20.23

> <i_rge_R1_i_sd_ChiralCenterCount>
0

> <i_rge_R1_i_sd_ChiralCenterCountAllPossible>
0

> <i_rge_R1_i_sd_RingCount>
1

> <r_rge_R1_r_sd_AlogP>
0.7929

> <s_rge_R1_s_sd_subgroup_title>
eMol BB r-groups

> <s_rge_R1_s_sd_subgroupid>
eMol BB r-groups

> <i_rge_R1_i_sd_subgroup_collapsed>
0

> <s_rge_R1_s_sd_Unique_SMILES_Stereo>
CC1(O)CCC1

> <i_rge_R1_i_sd_canvasUID>
599

> <s_rge_R1_s_canvas_Unique_SMILES_Stereo>
CC1(O)CCC1

> <s_psp_Prime_MMGBSA_Input_Structure_Hash>
eed0144ce2db0946a4eef5e82b96e873eee9d677786e697b55af4c5d

> <i_psp_number_heavy_atoms>
24

> <r_psp_MMGBSA_dG_Bind>
-35.7881072037781

> <r_psp_MMGBSA_dG_Bind_Coulomb>
1.94589019575142

> <r_psp_MMGBSA_dG_Bind_Covalent>
7.13186698951358

> <r_psp_MMGBSA_dG_Bind_Hbond>
-1.03603075934257

> <r_psp_MMGBSA_dG_Bind_Lipo>
-26.2906054977466

> <r_psp_MMGBSA_dG_Bind_Packing>
-2.28436542290316

> <r_psp_MMGBSA_dG_Bind_SelfCont>
7.105427357601e-015

> <r_psp_MMGBSA_dG_Bind_Solv_GB>
17.9475950401547

> <r_psp_MMGBSA_dG_Bind_vdW>
-33.2024577491061

> <r_psp_Lig_Strain_Energy>
12.6371840895557

> <r_psp_Lig_Strain_Coulomb>
0.518250833492647

> <r_psp_Lig_Strain_Covalent>
7.13206785762671

> <r_psp_Lig_Strain_Hbond>
0

> <r_psp_Lig_Strain_Lipo>
-0.040628105200843

> <r_psp_Lig_Strain_Packing>
0

> <r_psp_Lig_Strain_SelfCont>
0

> <r_psp_Lig_Strain_Solv_GB>
0.244393730372764

> <r_psp_Lig_Strain_vdW>
4.78309977326435

> <r_psp_Ligand_Energy>
14.3739722275841

> <r_psp_Ligand_Coulomb>
-25.2765245402762

> <r_psp_Ligand_Covalent>
40.7118990121678

> <r_psp_Ligand_Hbond>
0

> <r_psp_Ligand_Lipo>
-2.29199870341461

> <r_psp_Ligand_Packing>
0

> <r_psp_Ligand_SelfCont>
0

> <r_psp_Ligand_Solv_GB>
-10.2824336000987

> <r_psp_Ligand_vdW>
11.5130300592059

> <r_psp_Complex_Energy>
-34116.66517571

> <r_psp_Complex_Coulomb>
-26482.2464482875

> <r_psp_Complex_Covalent>
4438.25029182309

> <r_psp_Complex_Hbond>
-551.133635842524

> <r_psp_Complex_Lipo>
-2179.10723653864

> <r_psp_Complex_Packing>
-58.1290078501121

> <r_psp_Complex_SelfCont>
-40.4078915603482

> <r_psp_Complex_Solv_GB>
-5198.88661892253

> <r_psp_Complex_vdW>
-4045.00462853139

> <r_psp_Receptor_Energy>
-34095.2510407338

> <r_psp_Receptor_Coulomb>
-26458.915813943

> <r_psp_Receptor_Covalent>
4390.40652582141

> <r_psp_Receptor_Hbond>
-550.097605083181

> <r_psp_Receptor_Lipo>
-2150.52463233748

> <r_psp_Receptor_Packing>
-55.8446424272089

> <r_psp_Receptor_SelfCont>
-40.4078915603482

> <r_psp_Receptor_Solv_GB>
-5206.55178036259

> <r_psp_Receptor_vdW>
-4023.31520084149

> <r_psp_MMGBSA_dG_Bind(NS)>
-48.4252912932789

> <r_psp_MMGBSA_dG_Bind(NS)_Coulomb>
1.42763936221672

> <r_psp_MMGBSA_dG_Bind(NS)_Covalent>
-0.000200868112187891

> <r_psp_MMGBSA_dG_Bind(NS)_Hbond>
-1.03603075934234

> <r_psp_MMGBSA_dG_Bind(NS)_Lipo>
-26.249977392541

> <r_psp_MMGBSA_dG_Bind(NS)_Packing>
-2.28436542290321

> <r_psp_MMGBSA_dG_Bind(NS)_SelfCont>
0

> <r_psp_MMGBSA_dG_Bind(NS)_Solv_GB>
17.7032013097842

> <r_psp_MMGBSA_dG_Bind(NS)_vdW>
-37.9855575223751

> <r_psp_Rec_Strain_Energy>
-5.0931703299284e-011

> <r_psp_Rec_Strain_Coulomb>
4.00177668780088e-011

> <r_psp_Rec_Strain_Covalent>
-9.09494701772928e-013

> <r_psp_Rec_Strain_Hbond>
-2.27373675443232e-013

> <r_psp_Rec_Strain_Lipo>
-5.00222085975111e-012

> <r_psp_Rec_Strain_Packing>
4.9737991503207e-014

> <r_psp_Rec_Strain_SelfCont>
7.105427357601e-015

> <r_psp_Rec_Strain_Solv_GB>
-1.81898940354586e-012

> <r_psp_Rec_Strain_vdW>
4.54747350886464e-012

> <r_psp_Prime_MMGBSA_ligand_efficiency>
-1.49117113349075

> <r_psp_Prime_MMGBSA_ligand_efficiency_sa>
-2.23675670023613

> <r_psp_Prime_MMGBSA_ligand_efficiency_ln>
-8.56573626309588

> <r_i_glide_lipo>
-4.18899765871448

> <r_i_glide_hbond>
-0.163495686576806

> <r_i_glide_metal>
0

> <r_i_glide_rewards>
-2.18626614833593

> <r_i_glide_erotb>
0.880019047473601

> <r_i_glide_esite>
0

> <i_psp_ExecuteFunction_Internal_Entry_Index>
2291

> <i_qp_#stars>
0

> <i_qp_#amine>
0

> <i_qp_#amidine>
0

> <i_qp_#acid>
0

> <i_qp_#amide>
0

> <i_qp_#rotor>
5

> <i_qp_#rtvFG>
0

> <i_qp_CNS>
-1

> <r_qp_mol_MW>
   326.438

> <r_qp_dipole>
     4.959

> <r_qp_SASA>
   620.225

> <r_qp_FOSA>
   390.130

> <r_qp_FISA>
    72.022

> <r_qp_PISA>
   158.073

> <r_qp_WPSA>
     0.000

> <r_qp_volume>
  1101.640

> <r_qp_donorHB>
     3.000

> <r_qp_accptHB>
     3.250

> <r_qp_dip^2/V>
   0.0223269

> <r_qp_ACxDN^.5/SA>
   0.0090760

> <r_qp_glob>
   0.8317176

> <r_qp_QPpolrz>
    36.233

> <r_qp_QPlogPC16>
    10.743

> <r_qp_QPlogPoct>
    17.840

> <r_qp_QPlogPw>
     9.269

> <r_qp_QPlogPo/w>
     4.089

> <r_qp_QPlogS>
    -5.157

> <r_qp_CIQPlogS>
    -4.554

> <r_qp_QPlogHERG>
    -5.009

> <r_qp_QPPCaco>
  2055.504

> <r_qp_QPlogBB>
    -0.432

> <r_qp_QPPMDCK>
  1077.898

> <r_qp_QPlogKp>
    -1.810

> <r_qp_IP(eV)>
     8.298

> <r_qp_EA(eV)>
     0.300

> <i_qp_#metab>
1

> <r_qp_QPlogKhsa>
     0.573

> <i_qp_HumanOralAbsorption>
3

> <r_qp_PercentHumanOralAbsorption>
   100.000

> <r_qp_SAfluorine>
     0.000

> <r_qp_SAamideO>
     0.000

> <r_qp_PSA>
    66.109

> <i_qp_#NandO>
4

> <i_qp_RuleOfFive>
0

> <i_qp_RuleOfThree>
0

> <i_qp_#ringatoms>
19

> <i_qp_#in34>
4

> <i_qp_#in56>
15

> <i_qp_#noncon>
10

> <i_qp_#nonHatm>
24

> <r_qp_Jm>
0.0352078973558658

> <s_m_subgroupid>
1000_str-imp1->adme_1000-out12

> <s_m_subgroup_title>
1000_str->adme_1000-out1

> <b_m_subgroup_collapsed>
0

$$$$
ind_1,34694
                    3D
 Structure written by MMmdl.
 50 53  0  0  1  0            999 V2000
   -3.4736   -1.2997    0.1004 C   0  0  0  0  0  0
   -2.3133   -0.5175    0.0987 C   0  0  0  0  0  0
   -1.0086   -1.0882    0.0538 C   0  0  0  0  0  0
   -0.8874   -2.4864   -0.0098 C   0  0  0  0  0  0
   -2.0418   -3.2670   -0.0138 C   0  0  0  0  0  0
   -3.3047   -2.6834    0.0430 C   0  0  0  0  0  0
   -0.0752    0.0031    0.0974 C   0  0  0  0  0  0
   -0.8103    1.1915    0.0642 C   0  0  0  0  0  0
   -2.1430    0.8495    0.1320 N   0  0  0  0  0  0
   -0.3664    2.5643    0.1079 C   0  0  0  0  0  0
    0.9066    2.7491   -0.2889 N   0  0  0  0  0  0
   -1.1164    3.4747    0.4663 O   0  0  0  0  0  0
    1.6250    4.0236   -0.3028 C   0  0  0  0  0  0
    1.9881    4.5748    1.1018 C   0  0  0  0  0  0
    2.7935    5.8882    1.0617 C   0  0  0  0  0  0
    4.0206    5.7912    0.1411 C   0  0  0  0  0  0
    3.6194    5.3511   -1.2760 C   0  0  0  0  0  0
    2.8296    4.0276   -1.2751 C   0  0  0  0  0  0
   -4.4599   -0.8611    0.1377 H   0  0  0  0  0  0
    0.0846   -2.9551   -0.0525 H   0  0  0  0  0  0
   -1.9557   -4.3428   -0.0600 H   0  0  0  0  0  0
   -4.1772   -3.3201    0.0390 H   0  0  0  0  0  0
   -2.8690    1.5506    0.1709 H   0  0  0  0  0  0
    1.4563    1.9288   -0.5014 H   0  0  0  0  0  0
    0.9381    4.7585   -0.7306 H   0  0  0  0  0  0
    1.0861    4.7285    1.6955 H   0  0  0  0  0  0
    2.5874    3.8294    1.6274 H   0  0  0  0  0  0
    2.1468    6.6970    0.7175 H   0  0  0  0  0  0
    3.1069    6.1609    2.0703 H   0  0  0  0  0  0
    4.5318    6.7539    0.1006 H   0  0  0  0  0  0
    4.7368    5.0814    0.5578 H   0  0  0  0  0  0
    3.0135    6.1319   -1.7386 H   0  0  0  0  0  0
    4.5093    5.2506   -1.8985 H   0  0  0  0  0  0
    3.5182    3.2305   -0.9903 H   0  0  0  0  0  0
    2.4950    3.8072   -2.2901 H   0  0  0  0  0  0
    3.4329    0.3480    1.0119 C   0  0  0  0  0  0
    1.9924   -0.0942    1.3448 C   0  0  0  0  0  0
    1.2921   -0.1147    0.0861 O   0  0  0  0  0  0
    1.3660    0.6208    2.5684 C   0  0  0  0  0  0
    1.8526   -0.5610    3.4250 C   0  0  0  0  0  0
    1.8862   -1.4083    2.1407 C   0  0  0  0  0  0
    4.0737    0.3589    1.8941 H   0  0  0  0  0  0
    3.4433    1.3526    0.5895 H   0  0  0  0  0  0
    3.8906   -0.3223    0.2835 H   0  0  0  0  0  0
    1.7991    1.5894    2.8206 H   0  0  0  0  0  0
    0.2802    0.7165    2.5581 H   0  0  0  0  0  0
    2.8360   -0.4038    3.8722 H   0  0  0  0  0  0
    1.1568   -0.9017    4.1925 H   0  0  0  0  0  0
    0.9661   -1.9659    1.9695 H   0  0  0  0  0  0
    2.7317   -2.0906    2.0450 H   0  0  0  0  0  0
  1  2  2  0  0  0
  1  6  1  0  0  0
  1 19  1  0  0  0
  2  3  1  0  0  0
  2  9  1  0  0  0
  3  4  2  0  0  0
  3  7  1  0  0  0
  4  5  1  0  0  0
  4 20  1  0  0  0
  5  6  2  0  0  0
  5 21  1  0  0  0
  6 22  1  0  0  0
  7  8  2  0  0  0
  7 38  1  0  0  0
  8  9  1  0  0  0
  8 10  1  0  0  0
  9 23  1  0  0  0
 10 11  1  0  0  0
 10 12  2  0  0  0
 11 13  1  0  0  0
 11 24  1  0  0  0
 13 18  1  0  0  0
 13 14  1  0  0  0
 13 25  1  0  0  0
 14 15  1  0  0  0
 14 26  1  0  0  0
 14 27  1  0  0  0
 15 16  1  0  0  0
 15 28  1  0  0  0
 15 29  1  0  0  0
 16 17  1  0  0  0
 16 30  1  0  0  0
 16 31  1  0  0  0
 17 18  1  0  0  0
 17 32  1  0  0  0
 17 33  1  0  0  0
 18 34  1  0  0  0
 18 35  1  0  0  0
 36 37  1  0  0  0
 36 42  1  0  0  0
 36 43  1  0  0  0
 36 44  1  0  0  0
 37 41  1  0  0  0
 37 38  1  0  0  0
 37 39  1  0  0  0
 39 40  1  0  0  0
 39 45  1  0  0  0
 39 46  1  0  0  0
 40 41  1  0  0  0
 40 47  1  0  0  0
 40 48  1  0  0  0
 41 49  1  0  0  0
 41 50  1  0  0  0
M  END
> <s_m_entry_id>
7800

> <s_m_entry_name>
entry

> <i_f3d_flags>
0

> <s_m_job_name>
adme_1000

> <r_psp_Prime_Energy>
-34119.1714444638

> <r_psp_Prime_Solv_GB>
-5189.82304179509

> <r_psp_Prime_Coulomb>
-26485.7961762184

> <r_psp_Prime_vdW>
-4052.92775463877

> <r_psp_Prime_Covalent>
4432.52638976631

> <i_psp_model_num>
0

> <r_psp_Prime_Lipo>
-2176.77862931968

> <s_psp_Prime_Energy_Force_Field>
S-OPLS

> <s_psp_Prime_Energy_Solvent_Model>
VSGB2.1

> <r_psp_Prime_Hbond>
-550.119698270529

> <r_psp_Prime_Packing>
-55.8446424272089

> <r_psp_Prime_SelfCont>
-40.4078915603482

> <r_psp_Memb1_x>
103.457542316003

> <r_psp_Memb1_y>
39.4731108300965

> <r_psp_Memb1_z>
48.7987221124676

> <r_psp_Memb2_x>
99.8134167309003

> <r_psp_Memb2_y>
2.81176945184187

> <r_psp_Memb2_z>
23.8404289603493

> <r_psp_MembDummyRadius>
4.45

> <r_psp_Prime_Bond_Covalent>
467.110287802255

> <r_psp_Prime_Bond_SGB>
49975.8939058546

> <r_psp_Prime_Angle_Covalent>
2227.89580520987

> <r_psp_Prime_Angle_SGB>
-21660.7511810946

> <r_psp_Prime_Torsion_Covalent>
1737.52029675418

> <r_psp_Prime_NB14_LJ>
4239.64787261768

> <r_psp_Prime_NB14_Lipo>
0

> <r_psp_Prime_NB14_Elec>
25536.8514212137

> <r_psp_Prime_NB14_SGB>
-15617.9279385257

> <r_psp_Prime_NBShort_LJ>
-7877.77405574205

> <r_psp_Prime_NBShort_Lipo>
-2176.77862931968

> <r_psp_Prime_NBShort_Elec>
-53039.2365830352

> <r_psp_Prime_NBShort_SGB>
18023.1015638134

> <r_psp_Prime_NBLong_LJ>
-414.801571514397

> <r_psp_Prime_NBLong_Lipo>
0

> <r_psp_Prime_NBLong_Elec>
1016.58898560307

> <r_psp_Prime_NBLong_SGB>
-1167.14886960519

> <r_psp_Prime_Self_SGB>
-34742.9905222376

> <s_m_Source_Path>
F:\Dekstop_files\DAC4,5\Molecular Systems Desgn and Engineering\supplementary_str

> <s_m_Source_File>
1000_str.mae

> <i_m_Source_File_Index>
724

> <i_lp_mmshare_version>
53156

> <s_epik_input>
W2NIXTFbY0hdW2NIXVtjSF1jKGMxMiljKE9DMyhbQ0gzXSlbQ0gyXVtDSDJdW0NIMl0zKWMoW25IXTIpQyg9TylbTkhdW0NIXTRbQ0gyXVtDSDJdW0NIMl1bQ0gyXVtDSDJdNA==

> <s_epik_cmdline>
J2VwaWtfcHl0aG9uJywgJy1waHQnLCAnMC4wJywgJy1waCcsICc3LjAnLCAnLXRuJywgJzgnLCAnLW1hJywgJzUwMCcsICctaW1hZScsICc8aW5maWxlLm1hZT4nLCAnLW9tYWUnLCAnPG91dGZpbGUubWFlPic=

> <r_lp_tautomer_probability>
1

> <r_epik_Ionization_Penalty>
  0.0000

> <r_epik_Ionization_Penalty_Charging>
  0.0000

> <r_epik_Ionization_Penalty_Neutral>
  0.0000

> <r_epik_State_Penalty>
  0.0000

> <r_epik_Charging_Adjusted_Penalty>
0

> <i_epik_Tot_Q>
0

> <i_epik_Tot_abs_Q>
0

> <s_lp_Force_Field>
S-OPLS

> <r_lp_Energy>
44.9255

> <b_lp_Chiralities_Consistent>
1

> <s_lp_Variant>
ind_1,34694-1

> <s_i_glide_gridfile>
glide-grid_mmpl3

> <i_i_glide_lignum>
1549

> <i_i_glide_rotatable_bonds>
5

> <r_i_docking_score>
-8.34077713681747

> <r_i_glide_ligand_efficiency>
-0.347532380700728

> <r_i_glide_ligand_efficiency_sa>
-1.00245685240512

> <r_i_glide_ligand_efficiency_ln>
-1.99633070216399

> <r_i_glide_gscore>
-8.34077713681747

> <r_i_glide_evdw>
-36.2469711303711

> <r_i_glide_ecoul>
-0.618373692035675

> <r_i_glide_energy>
-36.8653448224068

> <r_i_glide_einternal>
5.51277923583984

> <r_i_glide_emodel>
-52.9265703222369

> <i_i_glide_confnum>
132

> <i_i_glide_posenum>
90

> <r_i_glide_eff_state_penalty>
0

> <i_rge_num_r_groups>
1

> <r_rge_occupation_R1>
1

> <s_rge_R1>
34694

> <s_rge_R1_s_m_title>
34694

> <s_rge_R1_s_m_entry_id>
17272

> <s_rge_R1_s_m_entry_name>
eMol_BB_r-groups.658

> <s_rge_R1_s_m_smiles>
[*]OC1(C)CCC1

> <b_rge_R1_b_sd_chiral_flag>
0

> <i_rge_R1_i_sd_version>
0

> <s_rge_R1_s_m_Source_File>
eMol_BB_r-groups-dedup.mae

> <i_rge_R1_i_m_Source_File_Index>
530

> <s_rge_R1_s_m_Source_Path>
/Users/konze/projects/pathfinder/r-groups

> <s_rge_R1_s_sd_Source_Path>
/Users/konze/projects/pathfinder/reactant sets/eMolecules

> <s_rge_R1_s_sd_Source_File>
eMol BB r-groups.mae

> <i_rge_R1_i_sd_Source_File_Index>
658

> <r_rge_R1_r_sd_MW>
86.1323

> <i_rge_R1_i_sd_RB>
0

> <i_rge_R1_i_sd_HeavyAtomCount>
6

> <i_rge_R1_i_sd_HBA>
1

> <i_rge_R1_i_sd_HBD>
1

> <r_rge_R1_r_sd_PSA>
20.23

> <i_rge_R1_i_sd_ChiralCenterCount>
0

> <i_rge_R1_i_sd_ChiralCenterCountAllPossible>
0

> <i_rge_R1_i_sd_RingCount>
1

> <r_rge_R1_r_sd_AlogP>
0.7929

> <s_rge_R1_s_sd_subgroup_title>
eMol BB r-groups

> <s_rge_R1_s_sd_subgroupid>
eMol BB r-groups

> <i_rge_R1_i_sd_subgroup_collapsed>
0

> <s_rge_R1_s_sd_Unique_SMILES_Stereo>
CC1(O)CCC1

> <i_rge_R1_i_sd_canvasUID>
599

> <s_rge_R1_s_canvas_Unique_SMILES_Stereo>
CC1(O)CCC1

> <s_psp_Prime_MMGBSA_Input_Structure_Hash>
7969825151b8bcc2857a9bd4e691783d9ae60c69336a668fb0146ae4

> <i_psp_number_heavy_atoms>
24

> <r_psp_MMGBSA_dG_Bind>
-40.6328937382423

> <r_psp_MMGBSA_dG_Bind_Coulomb>
-4.60057791870713

> <r_psp_MMGBSA_dG_Bind_Covalent>
1.77125345854802

> <r_psp_MMGBSA_dG_Bind_Hbond>
-0.0220931873476502

> <r_psp_MMGBSA_dG_Bind_Lipo>
-24.1485546011118

> <r_psp_MMGBSA_dG_Bind_Packing>
4.9737991503207e-014

> <r_psp_MMGBSA_dG_Bind_SelfCont>
7.105427357601e-015

> <r_psp_MMGBSA_dG_Bind_Solv_GB>
27.4888756363753

> <r_psp_MMGBSA_dG_Bind_vdW>
-41.1217971259125

> <r_psp_Lig_Strain_Energy>
5.80791218979488

> <r_psp_Lig_Strain_Coulomb>
2.09221819253941

> <r_psp_Lig_Strain_Covalent>
1.77145432666269

> <r_psp_Lig_Strain_Hbond>
0

> <r_psp_Lig_Strain_Lipo>
0.254907875239606

> <r_psp_Lig_Strain_Packing>
0

> <r_psp_Lig_Strain_SelfCont>
0

> <r_psp_Lig_Strain_Solv_GB>
-0.233993956625142

> <r_psp_Lig_Strain_vdW>
1.92332575197832

> <r_psp_Ligand_Energy>
16.7124900082812

> <r_psp_Ligand_Coulomb>
-22.279784356723

> <r_psp_Ligand_Covalent>
40.3486104863474

> <r_psp_Ligand_Hbond>
0

> <r_psp_Ligand_Lipo>
-2.10544238109116

> <r_psp_Ligand_Packing>
0

> <r_psp_Ligand_SelfCont>
0

> <r_psp_Ligand_Solv_GB>
-10.7601370688795

> <r_psp_Ligand_vdW>
11.5092433286275

> <r_psp_Complex_Energy>
-34119.1714444638

> <r_psp_Complex_Coulomb>
-26485.7961762184

> <r_psp_Complex_Covalent>
4432.52638976631

> <r_psp_Complex_Hbond>
-550.119698270529

> <r_psp_Complex_Lipo>
-2176.77862931968

> <r_psp_Complex_Packing>
-55.8446424272089

> <r_psp_Complex_SelfCont>
-40.4078915603482

> <r_psp_Complex_Solv_GB>
-5189.82304179509

> <r_psp_Complex_vdW>
-4052.92775463877

> <r_psp_Receptor_Energy>
-34095.2510407338

> <r_psp_Receptor_Coulomb>
-26458.915813943

> <r_psp_Receptor_Covalent>
4390.40652582141

> <r_psp_Receptor_Hbond>
-550.097605083181

> <r_psp_Receptor_Lipo>
-2150.52463233748

> <r_psp_Receptor_Packing>
-55.8446424272089

> <r_psp_Receptor_SelfCont>
-40.4078915603482

> <r_psp_Receptor_Solv_GB>
-5206.55178036259

> <r_psp_Receptor_vdW>
-4023.31520084149

> <r_psp_MMGBSA_dG_Bind(NS)>
-46.4408059279885

> <r_psp_MMGBSA_dG_Bind(NS)_Coulomb>
-6.69279611128877

> <r_psp_MMGBSA_dG_Bind(NS)_Covalent>
-0.000200868113097386

> <r_psp_MMGBSA_dG_Bind(NS)_Hbond>
-0.0220931873474228

> <r_psp_MMGBSA_dG_Bind(NS)_Lipo>
-24.4034624763462

> <r_psp_MMGBSA_dG_Bind(NS)_Packing>
0

> <r_psp_MMGBSA_dG_Bind(NS)_SelfCont>
0

> <r_psp_MMGBSA_dG_Bind(NS)_Solv_GB>
27.7228695930016

> <r_psp_MMGBSA_dG_Bind(NS)_vdW>
-43.0451228778952

> <r_psp_Rec_Strain_Energy>
-5.0931703299284e-011

> <r_psp_Rec_Strain_Coulomb>
4.00177668780088e-011

> <r_psp_Rec_Strain_Covalent>
-9.09494701772928e-013

> <r_psp_Rec_Strain_Hbond>
-2.27373675443232e-013

> <r_psp_Rec_Strain_Lipo>
-5.00222085975111e-012

> <r_psp_Rec_Strain_Packing>
4.9737991503207e-014

> <r_psp_Rec_Strain_SelfCont>
7.105427357601e-015

> <r_psp_Rec_Strain_Solv_GB>
-1.81898940354586e-012

> <r_psp_Rec_Strain_vdW>
4.54747350886464e-012

> <r_psp_Prime_MMGBSA_ligand_efficiency>
-1.69303723909343

> <r_psp_Prime_MMGBSA_ligand_efficiency_sa>
-2.53955585864014

> <r_psp_Prime_MMGBSA_ligand_efficiency_ln>
-9.72531599356114

> <r_i_glide_lipo>
-5.22918095811391

> <r_i_glide_hbond>
0

> <r_i_glide_metal>
0

> <r_i_glide_rewards>
-2.08651061585325

> <r_i_glide_erotb>
0.880019047473601

> <r_i_glide_esite>
0

> <i_psp_ExecuteFunction_Internal_Entry_Index>
1323

> <i_qp_#stars>
1

> <i_qp_#amine>
0

> <i_qp_#amidine>
0

> <i_qp_#acid>
0

> <i_qp_#amide>
0

> <i_qp_#rotor>
4

> <i_qp_#rtvFG>
0

> <i_qp_CNS>
0

> <r_qp_mol_MW>
   326.438

> <r_qp_dipole>
     2.671

> <r_qp_SASA>
   591.377

> <r_qp_FOSA>
   362.058

> <r_qp_FISA>
    59.058

> <r_qp_PISA>
   170.261

> <r_qp_WPSA>
     0.000

> <r_qp_volume>
  1077.551

> <r_qp_donorHB>
     2.000

> <r_qp_accptHB>
     3.250

> <r_qp_dip^2/V>
   0.0066228

> <r_qp_ACxDN^.5/SA>
   0.0077720

> <r_qp_glob>
   0.8595258

> <r_qp_QPpolrz>
    36.027

> <r_qp_QPlogPC16>
    10.336

> <r_qp_QPlogPoct>
    16.179

> <r_qp_QPlogPw>
     7.950

> <r_qp_QPlogPo/w>
     4.278

> <r_qp_QPlogS>
    -5.045

> <r_qp_CIQPlogS>
    -4.682

> <r_qp_QPlogHERG>
    -4.617

> <r_qp_QPPCaco>
  2728.066

> <r_qp_QPlogBB>
    -0.211

> <r_qp_QPPMDCK>
  1463.718

> <r_qp_QPlogKp>
    -1.624

> <r_qp_IP(eV)>
     8.378

> <r_qp_EA(eV)>
     0.502

> <i_qp_#metab>
0

> <r_qp_QPlogKhsa>
     0.674

> <i_qp_HumanOralAbsorption>
3

> <r_qp_PercentHumanOralAbsorption>
   100.000

> <r_qp_SAfluorine>
     0.000

> <r_qp_SAamideO>
     0.000

> <r_qp_PSA>
    54.247

> <i_qp_#NandO>
4

> <i_qp_RuleOfFive>
0

> <i_qp_RuleOfThree>
0

> <i_qp_#ringatoms>
19

> <i_qp_#in34>
4

> <i_qp_#in56>
15

> <i_qp_#noncon>
10

> <i_qp_#nonHatm>
24

> <r_qp_Jm>
0.0699992582855583

> <s_m_subgroupid>
1000_str-imp1->adme_1000-out12

> <s_m_subgroup_title>
1000_str->adme_1000-out1

> <b_m_subgroup_collapsed>
0

$$$$
ind_1,475715
                    3D
 Structure written by MMmdl.
 46 49  0  0  1  0            999 V2000
   -3.2052    1.7206    0.0036 C   0  0  0  0  0  0
   -2.0922    0.8724    0.0194 C   0  0  0  0  0  0
   -2.2138   -0.5461    0.0001 C   0  0  0  0  0  0
   -3.5002   -1.1115   -0.0357 C   0  0  0  0  0  0
   -4.6099   -0.2686   -0.0543 C   0  0  0  0  0  0
   -4.4619    1.1157   -0.0352 C   0  0  0  0  0  0
   -0.8781   -1.0781    0.0285 C   0  0  0  0  0  0
    0.0181    0.0009    0.0436 C   0  0  0  0  0  0
   -0.7430    1.1504    0.0588 N   0  0  0  0  0  0
    1.4642    0.0518    0.1173 C   0  0  0  0  0  0
    2.0837   -1.1271   -0.0806 N   0  0  0  0  0  0
    2.0555    1.1072    0.3550 O   0  0  0  0  0  0
    3.5288   -1.3588   -0.0768 C   0  0  0  0  0  0
    4.2697   -0.8753   -1.3491 C   0  0  0  0  0  0
    5.7779   -1.1929   -1.3429 C   0  0  0  0  0  0
    6.4671   -0.7393   -0.0454 C   0  0  0  0  0  0
    5.7821   -1.3431    1.1917 C   0  0  0  0  0  0
    4.2763   -1.0180    1.2409 C   0  0  0  0  0  0
   -3.1060    2.7962    0.0198 H   0  0  0  0  0  0
   -3.6314   -2.1836   -0.0506 H   0  0  0  0  0  0
   -5.6017   -0.6959   -0.0836 H   0  0  0  0  0  0
   -5.3446    1.7382   -0.0501 H   0  0  0  0  0  0
   -0.3159    2.0650    0.0905 H   0  0  0  0  0  0
    1.5419   -1.8329   -0.5584 H   0  0  0  0  0  0
    3.5888   -2.4477   -0.1241 H   0  0  0  0  0  0
    3.8129   -1.3102   -2.2394 H   0  0  0  0  0  0
    4.1571    0.2067   -1.4333 H   0  0  0  0  0  0
    5.9199   -2.2672   -1.4692 H   0  0  0  0  0  0
    6.2578   -0.7223   -2.2018 H   0  0  0  0  0  0
    7.5194   -1.0259   -0.0643 H   0  0  0  0  0  0
    6.4479    0.3498    0.0191 H   0  0  0  0  0  0
    5.9179   -2.4257    1.1877 H   0  0  0  0  0  0
    6.2680   -0.9811    2.0987 H   0  0  0  0  0  0
    4.1821    0.0484    1.4473 H   0  0  0  0  0  0
    3.8186   -1.5429    2.0807 H   0  0  0  0  0  0
   -0.2241   -2.8118   -2.2251 O   0  0  0  0  0  0
   -0.3936   -3.1843   -1.0647 C   0  0  0  0  0  0
   -0.6097   -2.4335    0.0411 N   0  0  0  0  0  0
   -0.5749   -3.1775    1.2858 C   0  0  0  0  0  0
   -0.1920   -4.5639    0.8337 C   0  0  0  0  0  0
   -0.3371   -4.4432   -0.5974 N   0  0  0  0  0  0
    0.1674   -2.7483    1.9603 H   0  0  0  0  0  0
   -1.5466   -3.1441    1.7808 H   0  0  0  0  0  0
    0.8217   -4.8548    1.1136 H   0  0  0  0  0  0
   -0.9067   -5.2910    1.2209 H   0  0  0  0  0  0
   -0.5824   -5.2455   -1.1593 H   0  0  0  0  0  0
  1  2  2  0  0  0
  1  6  1  0  0  0
  1 19  1  0  0  0
  2  3  1  0  0  0
  2  9  1  0  0  0
  3  4  2  0  0  0
  3  7  1  0  0  0
  4  5  1  0  0  0
  4 20  1  0  0  0
  5  6  2  0  0  0
  5 21  1  0  0  0
  6 22  1  0  0  0
  7  8  2  0  0  0
  7 38  1  0  0  0
  8  9  1  0  0  0
  8 10  1  0  0  0
  9 23  1  0  0  0
 10 11  1  0  0  0
 10 12  2  0  0  0
 11 13  1  0  0  0
 11 24  1  0  0  0
 13 18  1  0  0  0
 13 14  1  0  0  0
 13 25  1  0  0  0
 14 15  1  0  0  0
 14 26  1  0  0  0
 14 27  1  0  0  0
 15 16  1  0  0  0
 15 28  1  0  0  0
 15 29  1  0  0  0
 16 17  1  0  0  0
 16 30  1  0  0  0
 16 31  1  0  0  0
 17 18  1  0  0  0
 17 32  1  0  0  0
 17 33  1  0  0  0
 18 34  1  0  0  0
 18 35  1  0  0  0
 36 37  2  0  0  0
 37 41  1  0  0  0
 37 38  1  0  0  0
 38 39  1  0  0  0
 39 40  1  0  0  0
 39 42  1  0  0  0
 39 43  1  0  0  0
 40 41  1  0  0  0
 40 44  1  0  0  0
 40 45  1  0  0  0
 41 46  1  0  0  0
M  END
> <s_m_entry_id>
7269

> <s_m_entry_name>
entry

> <i_f3d_flags>
0

> <s_m_job_name>
adme_1000

> <r_psp_Prime_Energy>
-34127.6557515084

> <r_psp_Prime_Solv_GB>
-5186.99627262498

> <r_psp_Prime_Coulomb>
-26476.6978648507

> <r_psp_Prime_vdW>
-4064.18411650267

> <r_psp_Prime_Covalent>
4418.52989894142

> <i_psp_model_num>
0

> <r_psp_Prime_Lipo>
-2171.51731999736

> <s_psp_Prime_Energy_Force_Field>
S-OPLS

> <s_psp_Prime_Energy_Solvent_Model>
VSGB2.1

> <r_psp_Prime_Hbond>
-550.537542486528

> <r_psp_Prime_Packing>
-55.8446424272089

> <r_psp_Prime_SelfCont>
-40.4078915603482

> <r_psp_Memb1_x>
103.457542316003

> <r_psp_Memb1_y>
39.4731108300965

> <r_psp_Memb1_z>
48.7987221124676

> <r_psp_Memb2_x>
99.8134167309003

> <r_psp_Memb2_y>
2.81176945184187

> <r_psp_Memb2_z>
23.8404289603493

> <r_psp_MembDummyRadius>
4.45

> <r_psp_Prime_Bond_Covalent>
467.396585718415

> <r_psp_Prime_Bond_SGB>
49981.6569514827

> <r_psp_Prime_Angle_Covalent>
2222.58035645376

> <r_psp_Prime_Angle_SGB>
-21655.3065544478

> <r_psp_Prime_Torsion_Covalent>
1728.55295676925

> <r_psp_Prime_NB14_LJ>
4237.59275729922

> <r_psp_Prime_NB14_Lipo>
0

> <r_psp_Prime_NB14_Elec>
25588.0000973652

> <r_psp_Prime_NB14_SGB>
-15634.7571255517

> <r_psp_Prime_NBShort_LJ>
-7886.94174418305

> <r_psp_Prime_NBShort_Lipo>
-2171.51731999736

> <r_psp_Prime_NBShort_Elec>
-53082.8882323047

> <r_psp_Prime_NBShort_SGB>
18030.198406337

> <r_psp_Prime_NBLong_LJ>
-414.835129618837

> <r_psp_Prime_NBLong_Lipo>
0

> <r_psp_Prime_NBLong_Elec>
1018.19027008885

> <r_psp_Prime_NBLong_SGB>
-1161.54583134164

> <r_psp_Prime_Self_SGB>
-34747.2421191035

> <s_m_Source_Path>
F:\Dekstop_files\DAC4,5\Molecular Systems Desgn and Engineering\supplementary_str

> <s_m_Source_File>
1000_str.mae

> <i_m_Source_File_Index>
193

> <i_lp_mmshare_version>
53156

> <s_epik_input>
W2NIXTFbY0hdW2NIXVtjSF1jKGMxMiljKE4oQzM9TylbQ0gyXVtDSDJdW05IXTMpYyhbbkhdMilDKD1PKVtOSF1bQ0hdNFtDSDJdW0NIMl1bQ0gyXVtDSDJdW0NIMl00

> <s_epik_cmdline>
J2VwaWtfcHl0aG9uJywgJy1waHQnLCAnMC4wJywgJy1waCcsICc3LjAnLCAnLXRuJywgJzgnLCAnLW1hJywgJzUwMCcsICctaW1hZScsICc8aW5maWxlLm1hZT4nLCAnLW9tYWUnLCAnPG91dGZpbGUubWFlPic=

> <r_lp_tautomer_probability>
1

> <r_epik_Ionization_Penalty>
  0.0000

> <r_epik_Ionization_Penalty_Charging>
  0.0000

> <r_epik_Ionization_Penalty_Neutral>
  0.0000

> <r_epik_State_Penalty>
  0.0000

> <r_epik_Charging_Adjusted_Penalty>
0

> <i_epik_Tot_Q>
0

> <i_epik_Tot_abs_Q>
0

> <s_lp_Force_Field>
S-OPLS

> <r_lp_Energy>
28.799251

> <b_lp_Chiralities_Consistent>
1

> <s_lp_Variant>
ind_1,475715-1

> <s_i_glide_gridfile>
glide-grid_mmpl3

> <i_i_glide_lignum>
1554

> <i_i_glide_rotatable_bonds>
4

> <r_i_docking_score>
-9.20941865380971

> <r_i_glide_ligand_efficiency>
-0.383725777242071

> <r_i_glide_ligand_efficiency_sa>
-1.10685667351396

> <r_i_glide_ligand_efficiency_ln>
-2.20423647654218

> <r_i_glide_gscore>
-9.20941865380971

> <r_i_glide_evdw>
-45.8268814086914

> <r_i_glide_ecoul>
-2.03054785728455

> <r_i_glide_energy>
-47.857429265976

> <r_i_glide_einternal>
5.4123215675354

> <r_i_glide_emodel>
-67.7321869379129

> <i_i_glide_confnum>
17

> <i_i_glide_posenum>
172

> <r_i_glide_eff_state_penalty>
0

> <i_rge_num_r_groups>
1

> <r_rge_occupation_R1>
1

> <s_rge_R1>
475715

> <s_rge_R1_s_m_title>
475715

> <s_rge_R1_s_m_entry_id>
17277

> <s_rge_R1_s_m_entry_name>
eMol_BB_r-groups.660

> <s_rge_R1_s_m_smiles>
O=C1N([*])CCN1

> <b_rge_R1_b_sd_chiral_flag>
0

> <i_rge_R1_i_sd_version>
0

> <s_rge_R1_s_m_Source_File>
eMol_BB_r-groups-dedup.mae

> <i_rge_R1_i_m_Source_File_Index>
532

> <s_rge_R1_s_m_Source_Path>
/Users/konze/projects/pathfinder/r-groups

> <s_rge_R1_s_sd_Source_Path>
/Users/konze/projects/pathfinder/reactant sets/eMolecules

> <s_rge_R1_s_sd_Source_File>
eMol BB r-groups.mae

> <i_rge_R1_i_sd_Source_File_Index>
660

> <r_rge_R1_r_sd_MW>
86.0925

> <i_rge_R1_i_sd_RB>
0

> <i_rge_R1_i_sd_HeavyAtomCount>
6

> <i_rge_R1_i_sd_HBA>
1

> <i_rge_R1_i_sd_HBD>
2

> <r_rge_R1_r_sd_PSA>
41.13

> <i_rge_R1_i_sd_ChiralCenterCount>
0

> <i_rge_R1_i_sd_ChiralCenterCountAllPossible>
0

> <i_rge_R1_i_sd_RingCount>
1

> <r_rge_R1_r_sd_AlogP>
-0.4227

> <s_rge_R1_s_sd_subgroup_title>
eMol BB r-groups

> <s_rge_R1_s_sd_subgroupid>
eMol BB r-groups

> <i_rge_R1_i_sd_subgroup_collapsed>
0

> <s_rge_R1_s_sd_Unique_SMILES_Stereo>
O=C1NCCN1

> <i_rge_R1_i_sd_canvasUID>
601

> <s_rge_R1_s_canvas_Unique_SMILES_Stereo>
O=C1NCCN1

> <s_psp_Prime_MMGBSA_Input_Structure_Hash>
379359d6d4a85a41b0cf5097c357ec04096e1897039475fb914333e0

> <i_psp_number_heavy_atoms>
24

> <r_psp_MMGBSA_dG_Bind>
-43.4223600803525

> <r_psp_MMGBSA_dG_Bind_Coulomb>
-9.85407207302342

> <r_psp_MMGBSA_dG_Bind_Covalent>
5.06751663405794

> <r_psp_MMGBSA_dG_Bind_Hbond>
-0.439937403346562

> <r_psp_MMGBSA_dG_Bind_Lipo>
-19.7781744731542

> <r_psp_MMGBSA_dG_Bind_Packing>
4.9737991503207e-014

> <r_psp_MMGBSA_dG_Bind_SelfCont>
7.105427357601e-015

> <r_psp_MMGBSA_dG_Bind_Solv_GB>
32.9950411066484

> <r_psp_MMGBSA_dG_Bind_vdW>
-51.4127338714352

> <r_psp_Lig_Strain_Energy>
5.85082216638847

> <r_psp_Lig_Strain_Coulomb>
-0.153667578643351

> <r_psp_Lig_Strain_Covalent>
5.06771750217035

> <r_psp_Lig_Strain_Hbond>
0

> <r_psp_Lig_Strain_Lipo>
0.137467925414938

> <r_psp_Lig_Strain_Packing>
0

> <r_psp_Lig_Strain_SelfCont>
0

> <r_psp_Lig_Strain_Solv_GB>
0.317173525368474

> <r_psp_Lig_Strain_vdW>
0.482130792078143

> <r_psp_Ligand_Energy>
11.0176493057775

> <r_psp_Ligand_Coulomb>
-7.92797883465871

> <r_psp_Ligand_Covalent>
23.0558564859508

> <r_psp_Ligand_Hbond>
0

> <r_psp_Ligand_Lipo>
-1.21451318673024

> <r_psp_Ligand_Packing>
0

> <r_psp_Ligand_SelfCont>
0

> <r_psp_Ligand_Solv_GB>
-13.4395333690386

> <r_psp_Ligand_vdW>
10.5438182102542

> <r_psp_Complex_Energy>
-34127.6557515084

> <r_psp_Complex_Coulomb>
-26476.6978648507

> <r_psp_Complex_Covalent>
4418.52989894142

> <r_psp_Complex_Hbond>
-550.537542486528

> <r_psp_Complex_Lipo>
-2171.51731999736

> <r_psp_Complex_Packing>
-55.8446424272089

> <r_psp_Complex_SelfCont>
-40.4078915603482

> <r_psp_Complex_Solv_GB>
-5186.99627262498

> <r_psp_Complex_vdW>
-4064.18411650267

> <r_psp_Receptor_Energy>
-34095.2510407338

> <r_psp_Receptor_Coulomb>
-26458.915813943

> <r_psp_Receptor_Covalent>
4390.40652582141

> <r_psp_Receptor_Hbond>
-550.097605083181

> <r_psp_Receptor_Lipo>
-2150.52463233748

> <r_psp_Receptor_Packing>
-55.8446424272089

> <r_psp_Receptor_SelfCont>
-40.4078915603482

> <r_psp_Receptor_Solv_GB>
-5206.55178036259

> <r_psp_Receptor_vdW>
-4023.31520084149

> <r_psp_MMGBSA_dG_Bind(NS)>
-49.2731822466885

> <r_psp_MMGBSA_dG_Bind(NS)_Coulomb>
-9.70040449441876

> <r_psp_MMGBSA_dG_Bind(NS)_Covalent>
-0.000200868111278396

> <r_psp_MMGBSA_dG_Bind(NS)_Hbond>
-0.439937403346335

> <r_psp_MMGBSA_dG_Bind(NS)_Lipo>
-19.9156423985642

> <r_psp_MMGBSA_dG_Bind(NS)_Packing>
0

> <r_psp_MMGBSA_dG_Bind(NS)_SelfCont>
0

> <r_psp_MMGBSA_dG_Bind(NS)_Solv_GB>
32.677867581282

> <r_psp_MMGBSA_dG_Bind(NS)_vdW>
-51.8948646635176

> <r_psp_Rec_Strain_Energy>
-5.0931703299284e-011

> <r_psp_Rec_Strain_Coulomb>
4.00177668780088e-011

> <r_psp_Rec_Strain_Covalent>
-9.09494701772928e-013

> <r_psp_Rec_Strain_Hbond>
-2.27373675443232e-013

> <r_psp_Rec_Strain_Lipo>
-5.00222085975111e-012

> <r_psp_Rec_Strain_Packing>
4.9737991503207e-014

> <r_psp_Rec_Strain_SelfCont>
7.105427357601e-015

> <r_psp_Rec_Strain_Solv_GB>
-1.81898940354586e-012

> <r_psp_Rec_Strain_vdW>
4.54747350886464e-012

> <r_psp_Prime_MMGBSA_ligand_efficiency>
-1.80926500334802

> <r_psp_Prime_MMGBSA_ligand_efficiency_sa>
-2.71389750502203

> <r_psp_Prime_MMGBSA_ligand_efficiency_ln>
-10.392963289498

> <r_i_glide_lipo>
-4.26111541050691

> <r_i_glide_hbond>
0

> <r_i_glide_metal>
0

> <r_i_glide_rewards>
-3.05654364838627

> <r_i_glide_erotb>
0.704166654110723

> <r_i_glide_esite>
0

> <i_psp_ExecuteFunction_Internal_Entry_Index>
161

> <i_qp_#stars>
1

> <i_qp_#amine>
0

> <i_qp_#amidine>
0

> <i_qp_#acid>
0

> <i_qp_#amide>
0

> <i_qp_#rotor>
2

> <i_qp_#rtvFG>
0

> <i_qp_CNS>
-1

> <r_qp_mol_MW>
   326.397

> <r_qp_dipole>
     5.745

> <r_qp_SASA>
   589.040

> <r_qp_FOSA>
   301.991

> <r_qp_FISA>
   119.791

> <r_qp_PISA>
   167.257

> <r_qp_WPSA>
     0.000

> <r_qp_volume>
  1053.515

> <r_qp_donorHB>
     3.000

> <r_qp_accptHB>
     4.500

> <r_qp_dip^2/V>
   0.0313247

> <r_qp_ACxDN^.5/SA>
   0.0132321

> <r_qp_glob>
   0.8500566

> <r_qp_QPpolrz>
    36.321

> <r_qp_QPlogPC16>
    10.721

> <r_qp_QPlogPoct>
    19.073

> <r_qp_QPlogPw>
    11.474

> <r_qp_QPlogPo/w>
     3.031

> <r_qp_QPlogS>
    -4.816

> <r_qp_CIQPlogS>
    -4.565

> <r_qp_QPlogHERG>
    -4.756

> <r_qp_QPPCaco>
   724.306

> <r_qp_QPlogBB>
    -0.662

> <r_qp_QPPMDCK>
   349.094

> <r_qp_QPlogKp>
    -2.946

> <r_qp_IP(eV)>
     8.528

> <r_qp_EA(eV)>
     0.594

> <i_qp_#metab>
0

> <r_qp_QPlogKhsa>
     0.407

> <i_qp_HumanOralAbsorption>
3

> <r_qp_PercentHumanOralAbsorption>
    95.879

> <r_qp_SAfluorine>
     0.000

> <r_qp_SAamideO>
     0.000

> <r_qp_PSA>
    91.005

> <i_qp_#NandO>
6

> <i_qp_RuleOfFive>
0

> <i_qp_RuleOfThree>
0

> <i_qp_#ringatoms>
20

> <i_qp_#in34>
0

> <i_qp_#in56>
20

> <i_qp_#noncon>
8

> <i_qp_#nonHatm>
24

> <r_qp_Jm>
0.0056511427018482

> <s_m_subgroupid>
1000_str-imp1->adme_1000-out12

> <s_m_subgroup_title>
1000_str->adme_1000-out1

> <b_m_subgroup_collapsed>
0

$$$$
ind_1,476050
                    3D
 Structure written by MMmdl.
 49 52  0  0  1  0            999 V2000
   -3.2194   -1.7752   -0.4980 C   0  0  0  0  0  0
   -2.1795   -0.8507   -0.3487 C   0  0  0  0  0  0
   -0.8202   -1.2517   -0.2117 C   0  0  0  0  0  0
   -0.5131   -2.6226   -0.2262 C   0  0  0  0  0  0
   -1.5480   -3.5441   -0.3755 C   0  0  0  0  0  0
   -2.8699   -3.1262   -0.5082 C   0  0  0  0  0  0
   -0.0580   -0.0435   -0.0830 C   0  0  0  0  0  0
   -0.9233    1.0518   -0.1378 C   0  0  0  0  0  0
   -2.1935    0.5286   -0.2929 N   0  0  0  0  0  0
   -0.6364    2.4667    0.0041 C   0  0  0  0  0  0
   -1.6541    3.2921   -0.3156 N   0  0  0  0  0  0
    0.4695    2.8626    0.3753 O   0  0  0  0  0  0
   -1.6228    4.7548   -0.2494 C   0  0  0  0  0  0
   -2.7299    5.4219   -1.1013 C   0  0  0  0  0  0
   -2.7239    6.9617   -1.0294 C   0  0  0  0  0  0
   -2.7232    7.4761    0.4189 C   0  0  0  0  0  0
   -1.5494    6.8875    1.2181 C   0  0  0  0  0  0
   -1.5290    5.3465    1.1828 C   0  0  0  0  0  0
   -4.2496   -1.4668   -0.5998 H   0  0  0  0  0  0
    0.5079   -2.9608   -0.1244 H   0  0  0  0  0  0
   -1.3217   -4.6003   -0.3887 H   0  0  0  0  0  0
   -3.6455   -3.8695   -0.6212 H   0  0  0  0  0  0
   -3.0082    1.1222   -0.3468 H   0  0  0  0  0  0
   -2.5478    2.8830   -0.5431 H   0  0  0  0  0  0
   -0.6938    5.0572   -0.7400 H   0  0  0  0  0  0
   -2.6432    5.1106   -2.1433 H   0  0  0  0  0  0
   -3.7027    5.0760   -0.7478 H   0  0  0  0  0  0
   -1.8439    7.3441   -1.5491 H   0  0  0  0  0  0
   -3.5871    7.3607   -1.5635 H   0  0  0  0  0  0
   -2.6688    8.5655    0.4262 H   0  0  0  0  0  0
   -3.6652    7.2135    0.9023 H   0  0  0  0  0  0
   -0.6103    7.2683    0.8135 H   0  0  0  0  0  0
   -1.5942    7.2332    2.2516 H   0  0  0  0  0  0
   -2.3758    4.9853    1.7686 H   0  0  0  0  0  0
   -0.6267    4.9948    1.6845 H   0  0  0  0  0  0
    4.4780    0.6425   -1.3676 C   0  0  0  0  0  0
    3.3165    0.2909   -0.4685 C   0  0  0  0  0  0
    3.3291   -0.1117    0.8726 C   0  0  0  0  0  0
    2.0105   -0.3107    1.2456 C   0  0  0  0  0  0
    1.3704   -0.7382    2.5483 C   0  0  0  0  0  0
    1.3053   -0.0121    0.1023 N   0  0  0  0  0  0
    2.0862    0.3440   -0.9276 N   0  0  0  0  0  0
    5.4319    0.5711   -0.8446 H   0  0  0  0  0  0
    4.3993    1.6609   -1.7493 H   0  0  0  0  0  0
    4.5364   -0.0221   -2.2299 H   0  0  0  0  0  0
    4.2004   -0.2392    1.4979 H   0  0  0  0  0  0
    2.1104   -0.8819    3.3357 H   0  0  0  0  0  0
    0.8288   -1.6780    2.4407 H   0  0  0  0  0  0
    0.6580    0.0047    2.9079 H   0  0  0  0  0  0
  1  2  2  0  0  0
  1  6  1  0  0  0
  1 19  1  0  0  0
  2  3  1  0  0  0
  2  9  1  0  0  0
  3  4  2  0  0  0
  3  7  1  0  0  0
  4  5  1  0  0  0
  4 20  1  0  0  0
  5  6  2  0  0  0
  5 21  1  0  0  0
  6 22  1  0  0  0
  7  8  2  0  0  0
  7 41  1  0  0  0
  8  9  1  0  0  0
  8 10  1  0  0  0
  9 23  1  0  0  0
 10 11  1  0  0  0
 10 12  2  0  0  0
 11 13  1  0  0  0
 11 24  1  0  0  0
 13 18  1  0  0  0
 13 14  1  0  0  0
 13 25  1  0  0  0
 14 15  1  0  0  0
 14 26  1  0  0  0
 14 27  1  0  0  0
 15 16  1  0  0  0
 15 28  1  0  0  0
 15 29  1  0  0  0
 16 17  1  0  0  0
 16 30  1  0  0  0
 16 31  1  0  0  0
 17 18  1  0  0  0
 17 32  1  0  0  0
 17 33  1  0  0  0
 18 34  1  0  0  0
 18 35  1  0  0  0
 36 37  1  0  0  0
 36 43  1  0  0  0
 36 44  1  0  0  0
 36 45  1  0  0  0
 37 42  2  0  0  0
 37 38  1  0  0  0
 38 39  2  0  0  0
 38 46  1  0  0  0
 39 40  1  0  0  0
 39 41  1  0  0  0
 40 47  1  0  0  0
 40 48  1  0  0  0
 40 49  1  0  0  0
 41 42  1  0  0  0
M  END
> <s_m_entry_id>
7936

> <s_m_entry_name>
entry

> <i_f3d_flags>
0

> <s_m_job_name>
adme_1000

> <r_psp_Prime_Energy>
-34116.1113430625

> <r_psp_Prime_Solv_GB>
-5189.3874780215

> <r_psp_Prime_Coulomb>
-26470.1704912614

> <r_psp_Prime_vdW>
-4059.31698036935

> <r_psp_Prime_Covalent>
4422.97538349353

> <i_psp_model_num>
0

> <r_psp_Prime_Lipo>
-2173.86084066959

> <s_psp_Prime_Energy_Force_Field>
S-OPLS

> <s_psp_Prime_Energy_Solvent_Model>
VSGB2.1

> <r_psp_Prime_Hbond>
-550.098402246692

> <r_psp_Prime_Packing>
-55.8446424272089

> <r_psp_Prime_SelfCont>
-40.4078915603482

> <r_psp_Memb1_x>
103.457542316003

> <r_psp_Memb1_y>
39.4731108300965

> <r_psp_Memb1_z>
48.7987221124676

> <r_psp_Memb2_x>
99.8134167309003

> <r_psp_Memb2_y>
2.81176945184187

> <r_psp_Memb2_z>
23.8404289603493

> <r_psp_MembDummyRadius>
4.45

> <r_psp_Prime_Bond_Covalent>
468.015493608983

> <r_psp_Prime_Bond_SGB>
49971.8542923147

> <r_psp_Prime_Angle_Covalent>
2225.47953249309

> <r_psp_Prime_Angle_SGB>
-21656.3964247707

> <r_psp_Prime_Torsion_Covalent>
1729.48035739146

> <r_psp_Prime_NB14_LJ>
4236.69333349511

> <r_psp_Prime_NB14_Lipo>
0

> <r_psp_Prime_NB14_Elec>
25570.3268029453

> <r_psp_Prime_NB14_SGB>
-15624.4816190467

> <r_psp_Prime_NBShort_LJ>
-7880.96330921544

> <r_psp_Prime_NBShort_Lipo>
-2173.86084066959

> <r_psp_Prime_NBShort_Elec>
-53060.0417234247

> <r_psp_Prime_NBShort_SGB>
18022.2670211614

> <r_psp_Prime_NBLong_LJ>
-415.047004649017

> <r_psp_Prime_NBLong_Lipo>
0

> <r_psp_Prime_NBLong_Elec>
1019.54442921802

> <r_psp_Prime_NBLong_SGB>
-1162.83022037

> <r_psp_Prime_Self_SGB>
-34739.8005273102

> <s_m_Source_Path>
F:\Dekstop_files\DAC4,5\Molecular Systems Desgn and Engineering\supplementary_str

> <s_m_Source_File>
1000_str.mae

> <i_m_Source_File_Index>
860

> <i_lp_mmshare_version>
53156

> <s_epik_input>
W2NIXTFbY0hdW2NIXVtjSF1jKGMxMiljKC1uKG4zKWMoW0NIM10pW2NIXWMzW0NIM10pYyhbbkhdMilDKD1PKVtOSF1bQ0hdNFtDSDJdW0NIMl1bQ0gyXVtDSDJdW0NIMl00

> <s_epik_cmdline>
J2VwaWtfcHl0aG9uJywgJy1waHQnLCAnMC4wJywgJy1waCcsICc3LjAnLCAnLXRuJywgJzgnLCAnLW1hJywgJzUwMCcsICctaW1hZScsICc8aW5maWxlLm1hZT4nLCAnLW9tYWUnLCAnPG91dGZpbGUubWFlPic=

> <r_lp_tautomer_probability>
1

> <r_epik_Ionization_Penalty>
  0.0003

> <r_epik_Ionization_Penalty_Charging>
  0.0000

> <r_epik_Ionization_Penalty_Neutral>
  0.0003

> <r_epik_State_Penalty>
  0.0000

> <r_epik_Charging_Adjusted_Penalty>
0

> <i_epik_Tot_Q>
0

> <i_epik_Tot_abs_Q>
0

> <s_lp_Force_Field>
S-OPLS

> <r_lp_Energy>
32.735542

> <b_lp_Chiralities_Consistent>
1

> <s_lp_Variant>
ind_1,476050-1

> <s_i_glide_gridfile>
glide-grid_mmpl3

> <i_i_glide_lignum>
571

> <i_i_glide_rotatable_bonds>
4

> <r_i_docking_score>
-7.81819976263774

> <r_i_glide_ligand_efficiency>
-0.312727990505509

> <r_i_glide_ligand_efficiency_sa>
-0.914422190492637

> <r_i_glide_ligand_efficiency_ln>
-1.85314763628578

> <r_i_glide_gscore>
-7.81819976263774

> <r_i_glide_evdw>
-42.1372909545898

> <r_i_glide_ecoul>
0.799925625324249

> <r_i_glide_energy>
-41.3373653292656

> <r_i_glide_einternal>
1.40972805023193

> <r_i_glide_emodel>
-59.1123496211718

> <i_i_glide_confnum>
23

> <i_i_glide_posenum>
170

> <r_i_glide_eff_state_penalty>
0

> <i_rge_num_r_groups>
1

> <r_rge_occupation_R1>
1

> <s_rge_R1>
476050

> <s_rge_R1_s_m_title>
476050

> <s_rge_R1_s_m_entry_id>
16394

> <s_rge_R1_s_m_entry_name>
eMol_BB_r-groups.233

> <s_rge_R1_s_m_smiles>
[*]n(n1)c(C)cc1C

> <b_rge_R1_b_sd_chiral_flag>
0

> <i_rge_R1_i_sd_version>
0

> <s_rge_R1_s_m_Source_File>
eMol_BB_r-groups-dedup.mae

> <i_rge_R1_i_m_Source_File_Index>
160

> <s_rge_R1_s_m_Source_Path>
/Users/konze/projects/pathfinder/r-groups

> <s_rge_R1_s_sd_Source_Path>
/Users/konze/projects/pathfinder/reactant sets/eMolecules

> <s_rge_R1_s_sd_Source_File>
eMol BB r-groups.mae

> <i_rge_R1_i_sd_Source_File_Index>
233

> <r_rge_R1_r_sd_MW>
96.1304

> <i_rge_R1_i_sd_RB>
0

> <i_rge_R1_i_sd_HeavyAtomCount>
7

> <i_rge_R1_i_sd_HBA>
1

> <i_rge_R1_i_sd_HBD>
1

> <r_rge_R1_r_sd_PSA>
28.68

> <i_rge_R1_i_sd_ChiralCenterCount>
0

> <i_rge_R1_i_sd_ChiralCenterCountAllPossible>
0

> <i_rge_R1_i_sd_RingCount>
1

> <r_rge_R1_r_sd_AlogP>
0.3686

> <s_rge_R1_s_sd_subgroup_title>
eMol BB r-groups

> <s_rge_R1_s_sd_subgroupid>
eMol BB r-groups

> <i_rge_R1_i_sd_subgroup_collapsed>
0

> <s_rge_R1_s_sd_Unique_SMILES_Stereo>
Cc1cc(C)[nH]n1

> <i_rge_R1_i_sd_canvasUID>
178

> <s_rge_R1_s_canvas_Unique_SMILES_Stereo>
Cc1cc(C)[nH]n1

> <s_psp_Prime_MMGBSA_Input_Structure_Hash>
b4f1fdfd67892e0733cc0a37397a5ec35ee75e1cef76b4762d3f6214

> <i_psp_number_heavy_atoms>
25

> <r_psp_MMGBSA_dG_Bind>
-28.4024423129595

> <r_psp_MMGBSA_dG_Bind_Coulomb>
4.75666984046256

> <r_psp_MMGBSA_dG_Bind_Covalent>
6.10830832428564

> <r_psp_MMGBSA_dG_Bind_Hbond>
-0.000797163511492727

> <r_psp_MMGBSA_dG_Bind_Lipo>
-22.0562182598933

> <r_psp_MMGBSA_dG_Bind_Packing>
4.9737991503207e-014

> <r_psp_MMGBSA_dG_Bind_SelfCont>
7.105427357601e-015

> <r_psp_MMGBSA_dG_Bind_Solv_GB>
27.5120246537645

> <r_psp_MMGBSA_dG_Bind_vdW>
-44.722429707962

> <r_psp_Lig_Strain_Energy>
8.24913140294994

> <r_psp_Lig_Strain_Coulomb>
-1.09778649282596

> <r_psp_Lig_Strain_Covalent>
6.10850919239714

> <r_psp_Lig_Strain_Hbond>
0

> <r_psp_Lig_Strain_Lipo>
-0.0963323708527131

> <r_psp_Lig_Strain_Packing>
0

> <r_psp_Lig_Strain_SelfCont>
0

> <r_psp_Lig_Strain_Solv_GB>
0.317517743582655

> <r_psp_Lig_Strain_vdW>
3.0172233306488

> <r_psp_Ligand_Energy>
7.54213998420667

> <r_psp_Ligand_Coulomb>
-16.0113471588445

> <r_psp_Ligand_Covalent>
26.4605493478397

> <r_psp_Ligand_Hbond>
0

> <r_psp_Ligand_Lipo>
-1.27999007221408

> <r_psp_Ligand_Packing>
0

> <r_psp_Ligand_SelfCont>
0

> <r_psp_Ligand_Solv_GB>
-10.3477223126792

> <r_psp_Ligand_vdW>
8.7206501801048

> <r_psp_Complex_Energy>
-34116.1113430625

> <r_psp_Complex_Coulomb>
-26470.1704912614

> <r_psp_Complex_Covalent>
4422.97538349353

> <r_psp_Complex_Hbond>
-550.098402246692

> <r_psp_Complex_Lipo>
-2173.86084066959

> <r_psp_Complex_Packing>
-55.8446424272089

> <r_psp_Complex_SelfCont>
-40.4078915603482

> <r_psp_Complex_Solv_GB>
-5189.3874780215

> <r_psp_Complex_vdW>
-4059.31698036935

> <r_psp_Receptor_Energy>
-34095.2510407338

> <r_psp_Receptor_Coulomb>
-26458.915813943

> <r_psp_Receptor_Covalent>
4390.40652582141

> <r_psp_Receptor_Hbond>
-550.097605083181

> <r_psp_Receptor_Lipo>
-2150.52463233748

> <r_psp_Receptor_Packing>
-55.8446424272089

> <r_psp_Receptor_SelfCont>
-40.4078915603482

> <r_psp_Receptor_Solv_GB>
-5206.55178036259

> <r_psp_Receptor_vdW>
-4023.31520084149

> <r_psp_MMGBSA_dG_Bind(NS)>
-36.6515737158552

> <r_psp_MMGBSA_dG_Bind(NS)_Coulomb>
5.85445633324707

> <r_psp_MMGBSA_dG_Bind(NS)_Covalent>
-0.000200868111278396

> <r_psp_MMGBSA_dG_Bind(NS)_Hbond>
-0.000797163511265353

> <r_psp_MMGBSA_dG_Bind(NS)_Lipo>
-21.9598858890354

> <r_psp_MMGBSA_dG_Bind(NS)_Packing>
0

> <r_psp_MMGBSA_dG_Bind(NS)_SelfCont>
0

> <r_psp_MMGBSA_dG_Bind(NS)_Solv_GB>
27.1945069101839

> <r_psp_MMGBSA_dG_Bind(NS)_vdW>
-47.7396530386154

> <r_psp_Rec_Strain_Energy>
-5.0931703299284e-011

> <r_psp_Rec_Strain_Coulomb>
4.00177668780088e-011

> <r_psp_Rec_Strain_Covalent>
-9.09494701772928e-013

> <r_psp_Rec_Strain_Hbond>
-2.27373675443232e-013

> <r_psp_Rec_Strain_Lipo>
-5.00222085975111e-012

> <r_psp_Rec_Strain_Packing>
4.9737991503207e-014

> <r_psp_Rec_Strain_SelfCont>
7.105427357601e-015

> <r_psp_Rec_Strain_Solv_GB>
-1.81898940354586e-012

> <r_psp_Rec_Strain_vdW>
4.54747350886464e-012

> <r_psp_Prime_MMGBSA_ligand_efficiency>
-1.13609769251838

> <r_psp_Prime_MMGBSA_ligand_efficiency_sa>
-1.70414653877757

> <r_psp_Prime_MMGBSA_ligand_efficiency_ln>
-6.73222998068372

> <r_i_glide_lipo>
-4.07301569245551

> <r_i_glide_hbond>
0

> <r_i_glide_metal>
0

> <r_i_glide_rewards>
-2.4257526633049

> <r_i_glide_erotb>
0.667444297053534

> <r_i_glide_esite>
0

> <i_psp_ExecuteFunction_Internal_Entry_Index>
2040

> <i_qp_#stars>
0

> <i_qp_#amine>
0

> <i_qp_#amidine>
0

> <i_qp_#acid>
0

> <i_qp_#amide>
0

> <i_qp_#rotor>
2

> <i_qp_#rtvFG>
0

> <i_qp_CNS>
0

> <r_qp_mol_MW>
   336.436

> <r_qp_dipole>
     8.257

> <r_qp_SASA>
   658.115

> <r_qp_FOSA>
   402.209

> <r_qp_FISA>
    55.834

> <r_qp_PISA>
   200.072

> <r_qp_WPSA>
     0.000

> <r_qp_volume>
  1153.216

> <r_qp_donorHB>
     2.000

> <r_qp_accptHB>
     3.500

> <r_qp_dip^2/V>
   0.0591204

> <r_qp_ACxDN^.5/SA>
   0.0075211

> <r_qp_glob>
   0.8081092

> <r_qp_QPpolrz>
    40.624

> <r_qp_QPlogPC16>
    11.187

> <r_qp_QPlogPoct>
    18.575

> <r_qp_QPlogPw>
     8.979

> <r_qp_QPlogPo/w>
     4.696

> <r_qp_QPlogS>
    -6.479

> <r_qp_CIQPlogS>
    -5.353

> <r_qp_QPlogHERG>
    -5.591

> <r_qp_QPPCaco>
  2927.031

> <r_qp_QPlogBB>
    -0.127

> <r_qp_QPPMDCK>
  1579.439

> <r_qp_QPlogKp>
    -1.652

> <r_qp_IP(eV)>
     8.645

> <r_qp_EA(eV)>
     0.784

> <i_qp_#metab>
2

> <r_qp_QPlogKhsa>
     0.901

> <i_qp_HumanOralAbsorption>
1

> <r_qp_PercentHumanOralAbsorption>
   100.000

> <r_qp_SAfluorine>
     0.000

> <r_qp_SAamideO>
     0.000

> <r_qp_PSA>
    63.854

> <i_qp_#NandO>
5

> <i_qp_RuleOfFive>
0

> <i_qp_RuleOfThree>
1

> <i_qp_#ringatoms>
20

> <i_qp_#in34>
0

> <i_qp_#in56>
20

> <i_qp_#noncon>
6

> <i_qp_#nonHatm>
25

> <r_qp_Jm>
0.00249058769071093

> <s_m_subgroupid>
1000_str-imp1->adme_1000-out12

> <s_m_subgroup_title>
1000_str->adme_1000-out1

> <b_m_subgroup_collapsed>
0

$$$$
ind_1,476050
                    3D
 Structure written by MMmdl.
 49 52  0  0  1  0            999 V2000
   -3.2915    1.6496   -0.0068 C   0  0  0  0  0  0
   -2.2304    0.7376   -0.0289 C   0  0  0  0  0  0
   -0.8684    1.1435    0.0308 C   0  0  0  0  0  0
   -0.5849    2.5177    0.1177 C   0  0  0  0  0  0
   -1.6380    3.4305    0.1398 C   0  0  0  0  0  0
   -2.9612    3.0021    0.0787 C   0  0  0  0  0  0
   -0.0513   -0.0423   -0.0199 C   0  0  0  0  0  0
   -0.9321   -1.1329   -0.0840 C   0  0  0  0  0  0
   -2.2193   -0.6336   -0.1044 N   0  0  0  0  0  0
   -0.6275   -2.5523   -0.1420 C   0  0  0  0  0  0
   -1.6943   -3.3753   -0.0642 N   0  0  0  0  0  0
    0.5302   -2.9620   -0.2315 O   0  0  0  0  0  0
   -1.6483   -4.8389   -0.0945 C   0  0  0  0  0  0
   -2.9103   -5.4973    0.5132 C   0  0  0  0  0  0
   -2.8792   -7.0382    0.4788 C   0  0  0  0  0  0
   -2.5661   -7.5825   -0.9244 C   0  0  0  0  0  0
   -1.2542   -6.9956   -1.4704 C   0  0  0  0  0  0
   -1.2535   -5.4542   -1.4636 C   0  0  0  0  0  0
   -4.3225    1.3307   -0.0527 H   0  0  0  0  0  0
    0.4357    2.8676    0.1658 H   0  0  0  0  0  0
   -1.4249    4.4874    0.2049 H   0  0  0  0  0  0
   -3.7527    3.7372    0.0978 H   0  0  0  0  0  0
   -3.0246   -1.2395   -0.1590 H   0  0  0  0  0  0
   -2.6161   -2.9653   -0.0733 H   0  0  0  0  0  0
   -0.8453   -5.1275    0.5892 H   0  0  0  0  0  0
   -3.0513   -5.1630    1.5422 H   0  0  0  0  0  0
   -3.7860   -5.1677   -0.0484 H   0  0  0  0  0  0
   -2.1275   -7.3996    1.1823 H   0  0  0  0  0  0
   -3.8335   -7.4355    0.8265 H   0  0  0  0  0  0
   -2.5024   -8.6709   -0.8948 H   0  0  0  0  0  0
   -3.3861   -7.3423   -1.6029 H   0  0  0  0  0  0
   -0.4193   -7.3579   -0.8685 H   0  0  0  0  0  0
   -1.0770   -7.3609   -2.4826 H   0  0  0  0  0  0
   -1.9624   -5.1135   -2.2198 H   0  0  0  0  0  0
   -0.2698   -5.0992   -1.7735 H   0  0  0  0  0  0
    1.4712   -0.0279    0.0201 C   0  0  0  0  0  0
    1.9972    0.0506    1.4408 C   0  0  0  0  0  0
    2.8091    1.0358    2.0213 C   0  0  0  0  0  0
    3.0357    0.6486    3.3303 C   0  0  0  0  0  0
    3.8137    1.2534    4.4731 C   0  0  0  0  0  0
    2.3543   -0.5335    3.4342 N   0  0  0  0  0  0
    1.7341   -0.9035    2.3098 N   0  0  0  0  0  0
    2.3141   -1.0958    4.2720 H   0  0  0  0  0  0
    1.8988   -0.8927   -0.4848 H   0  0  0  0  0  0
    1.8426    0.8173   -0.5606 H   0  0  0  0  0  0
    3.1853    1.9257    1.5390 H   0  0  0  0  0  0
    4.2719    2.2026    4.1941 H   0  0  0  0  0  0
    4.6160    0.5944    4.8060 H   0  0  0  0  0  0
    3.1763    1.4451    5.3367 H   0  0  0  0  0  0
  1  2  2  0  0  0
  1  6  1  0  0  0
  1 19  1  0  0  0
  2  3  1  0  0  0
  2  9  1  0  0  0
  3  4  2  0  0  0
  3  7  1  0  0  0
  4  5  1  0  0  0
  4 20  1  0  0  0
  5  6  2  0  0  0
  5 21  1  0  0  0
  6 22  1  0  0  0
  7  8  2  0  0  0
  7 36  1  0  0  0
  8  9  1  0  0  0
  8 10  1  0  0  0
  9 23  1  0  0  0
 10 11  1  0  0  0
 10 12  2  0  0  0
 11 13  1  0  0  0
 11 24  1  0  0  0
 13 18  1  0  0  0
 13 14  1  0  0  0
 13 25  1  0  0  0
 14 15  1  0  0  0
 14 26  1  0  0  0
 14 27  1  0  0  0
 15 16  1  0  0  0
 15 28  1  0  0  0
 15 29  1  0  0  0
 16 17  1  0  0  0
 16 30  1  0  0  0
 16 31  1  0  0  0
 17 18  1  0  0  0
 17 32  1  0  0  0
 17 33  1  0  0  0
 18 34  1  0  0  0
 18 35  1  0  0  0
 36 37  1  0  0  0
 36 44  1  0  0  0
 36 45  1  0  0  0
 37 42  2  0  0  0
 37 38  1  0  0  0
 38 39  2  0  0  0
 38 46  1  0  0  0
 39 40  1  0  0  0
 39 41  1  0  0  0
 40 47  1  0  0  0
 40 48  1  0  0  0
 40 49  1  0  0  0
 41 42  1  0  0  0
 41 43  1  0  0  0
M  END
> <s_m_entry_id>
7774

> <s_m_entry_name>
entry

> <i_f3d_flags>
0

> <s_m_job_name>
adme_1000

> <r_psp_Prime_Energy>
-34123.9489401632

> <r_psp_Prime_Solv_GB>
-5187.41025583592

> <r_psp_Prime_Coulomb>
-26486.0767805712

> <r_psp_Prime_vdW>
-4050.14978673674

> <r_psp_Prime_Covalent>
4424.69024818445

> <i_psp_model_num>
0

> <r_psp_Prime_Lipo>
-2178.3427151667

> <s_psp_Prime_Energy_Force_Field>
S-OPLS

> <s_psp_Prime_Energy_Solvent_Model>
VSGB2.1

> <r_psp_Prime_Hbond>
-550.407115830834

> <r_psp_Prime_Packing>
-55.8446426458479

> <r_psp_Prime_SelfCont>
-40.4078915603482

> <r_psp_Memb1_x>
103.457542316003

> <r_psp_Memb1_y>
39.4731108300965

> <r_psp_Memb1_z>
48.7987221124676

> <r_psp_Memb2_x>
99.8134167309003

> <r_psp_Memb2_y>
2.81176945184187

> <r_psp_Memb2_z>
23.8404289603493

> <r_psp_MembDummyRadius>
4.45

> <r_psp_Prime_Bond_Covalent>
467.140435140618

> <r_psp_Prime_Bond_SGB>
49971.3874843252

> <r_psp_Prime_Angle_Covalent>
2228.27723295051

> <r_psp_Prime_Angle_SGB>
-21657.9094949669

> <r_psp_Prime_Torsion_Covalent>
1729.27258009333

> <r_psp_Prime_NB14_LJ>
4237.41634993617

> <r_psp_Prime_NB14_Lipo>
0

> <r_psp_Prime_NB14_Elec>
25557.4082725977

> <r_psp_Prime_NB14_SGB>
-15616.3734921983

> <r_psp_Prime_NBShort_LJ>
-7872.8546459236

> <r_psp_Prime_NBShort_Lipo>
-2178.3427151667

> <r_psp_Prime_NBShort_Elec>
-53057.6660293839

> <r_psp_Prime_NBShort_SGB>
18017.8931908572

> <r_psp_Prime_NBLong_LJ>
-414.711490749309

> <r_psp_Prime_NBLong_Lipo>
0

> <r_psp_Prime_NBLong_Elec>
1014.18097621493

> <r_psp_Prime_NBLong_SGB>
-1161.4755439292

> <r_psp_Prime_Self_SGB>
-34740.9323999239

> <s_m_Source_Path>
F:\Dekstop_files\DAC4,5\Molecular Systems Desgn and Engineering\supplementary_str

> <s_m_Source_File>
1000_str.mae

> <i_m_Source_File_Index>
698

> <i_lp_mmshare_version>
53156

> <s_epik_input>
bjFbbkhdYyhbQ0gzXSlbY0hdYzFbQ0gyXWMoYyhjMjMpW2NIXVtjSF1bY0hdW2NIXTIpYyhbbkhdMylDKD1PKVtOSF1bQ0hdNFtDSDJdW0NIMl1bQ0gyXVtDSDJdW0NIMl00

> <s_epik_cmdline>
J2VwaWtfcHl0aG9uJywgJy1waHQnLCAnMC4wJywgJy1waCcsICc3LjAnLCAnLXRuJywgJzgnLCAnLW1hJywgJzUwMCcsICctaW1hZScsICc8aW5maWxlLm1hZT4nLCAnLW9tYWUnLCAnPG91dGZpbGUubWFlPic=

> <r_lp_tautomer_probability>
1

> <r_epik_Ionization_Penalty>
  0.0007

> <r_epik_Ionization_Penalty_Charging>
  0.0000

> <r_epik_Ionization_Penalty_Neutral>
  0.0007

> <r_epik_State_Penalty>
  0.0000

> <r_epik_Charging_Adjusted_Penalty>
0

> <i_epik_Tot_Q>
0

> <i_epik_Tot_abs_Q>
0

> <s_lp_Force_Field>
S-OPLS

> <r_lp_Energy>
35.770782

> <b_lp_Chiralities_Consistent>
1

> <s_lp_Variant>
ind_1,476050-1

> <s_i_glide_gridfile>
glide-grid_mmpl3

> <i_i_glide_lignum>
568

> <i_i_glide_rotatable_bonds>
5

> <r_i_docking_score>
-9.3795496552425

> <r_i_glide_ligand_efficiency>
-0.3751819862097

> <r_i_glide_ligand_efficiency_sa>
-1.09703878155802

> <r_i_glide_ligand_efficiency_ln>
-2.22323435071368

> <r_i_glide_gscore>
-9.3795496552425

> <r_i_glide_evdw>
-42.8871459960938

> <r_i_glide_ecoul>
-2.32711315155029

> <r_i_glide_energy>
-45.214259147644

> <r_i_glide_einternal>
1.55877208709717

> <r_i_glide_emodel>
-67.2895708817541

> <i_i_glide_confnum>
68

> <i_i_glide_posenum>
25

> <r_i_glide_eff_state_penalty>
0

> <i_rge_num_r_groups>
1

> <r_rge_occupation_R1>
1

> <s_rge_R1>
476050

> <s_rge_R1_s_m_title>
476050

> <s_rge_R1_s_m_entry_id>
16391

> <s_rge_R1_s_m_entry_name>
eMol_BB_r-groups.233

> <s_rge_R1_s_m_smiles>
[*]Cc1cc(C)[nH]n1

> <b_rge_R1_b_sd_chiral_flag>
0

> <i_rge_R1_i_sd_version>
0

> <s_rge_R1_s_m_Source_File>
eMol_BB_r-groups-dedup.mae

> <i_rge_R1_i_m_Source_File_Index>
160

> <s_rge_R1_s_m_Source_Path>
/Users/konze/projects/pathfinder/r-groups

> <s_rge_R1_s_sd_Source_Path>
/Users/konze/projects/pathfinder/reactant sets/eMolecules

> <s_rge_R1_s_sd_Source_File>
eMol BB r-groups.mae

> <i_rge_R1_i_sd_Source_File_Index>
233

> <r_rge_R1_r_sd_MW>
96.1304

> <i_rge_R1_i_sd_RB>
0

> <i_rge_R1_i_sd_HeavyAtomCount>
7

> <i_rge_R1_i_sd_HBA>
1

> <i_rge_R1_i_sd_HBD>
1

> <r_rge_R1_r_sd_PSA>
28.68

> <i_rge_R1_i_sd_ChiralCenterCount>
0

> <i_rge_R1_i_sd_ChiralCenterCountAllPossible>
0

> <i_rge_R1_i_sd_RingCount>
1

> <r_rge_R1_r_sd_AlogP>
0.3686

> <s_rge_R1_s_sd_subgroup_title>
eMol BB r-groups

> <s_rge_R1_s_sd_subgroupid>
eMol BB r-groups

> <i_rge_R1_i_sd_subgroup_collapsed>
0

> <s_rge_R1_s_sd_Unique_SMILES_Stereo>
Cc1cc(C)[nH]n1

> <i_rge_R1_i_sd_canvasUID>
178

> <s_rge_R1_s_canvas_Unique_SMILES_Stereo>
Cc1cc(C)[nH]n1

> <s_psp_Prime_MMGBSA_Input_Structure_Hash>
0fcfb4ffe7278dbc8e604d03982ca9f1977be24fa1c3c21bc46f7e1f

> <i_psp_number_heavy_atoms>
25

> <r_psp_MMGBSA_dG_Bind>
-34.9729978092582

> <r_psp_MMGBSA_dG_Bind_Coulomb>
-7.11968333812547

> <r_psp_MMGBSA_dG_Bind_Covalent>
7.24112936181155

> <r_psp_MMGBSA_dG_Bind_Hbond>
-0.30951074765278

> <r_psp_MMGBSA_dG_Bind_Lipo>
-25.9166379175076

> <r_psp_MMGBSA_dG_Bind_Packing>
-2.18639023330525e-007

> <r_psp_MMGBSA_dG_Bind_SelfCont>
7.105427357601e-015

> <r_psp_MMGBSA_dG_Bind_Solv_GB>
29.1564857583899

> <r_psp_MMGBSA_dG_Bind_vdW>
-38.0247807074393

> <r_psp_Lig_Strain_Energy>
8.23029911950468

> <r_psp_Lig_Strain_Coulomb>
0.754943578428509

> <r_psp_Lig_Strain_Covalent>
7.24133022992376

> <r_psp_Lig_Strain_Hbond>
0

> <r_psp_Lig_Strain_Lipo>
0.106107019729931

> <r_psp_Lig_Strain_Packing>
0

> <r_psp_Lig_Strain_SelfCont>
0

> <r_psp_Lig_Strain_Solv_GB>
-0.28139498602566

> <r_psp_Lig_Strain_vdW>
0.409313277448142

> <r_psp_Ligand_Energy>
6.27509837989184

> <r_psp_Ligand_Coulomb>
-20.0412832900949

> <r_psp_Ligand_Covalent>
27.0425930012306

> <r_psp_Ligand_Hbond>
0

> <r_psp_Ligand_Lipo>
-1.90144491171158

> <r_psp_Ligand_Packing>
0

> <r_psp_Ligand_SelfCont>
0

> <r_psp_Ligand_Solv_GB>
-10.0149612317227

> <r_psp_Ligand_vdW>
11.1901948121904

> <r_psp_Complex_Energy>
-34123.9489401632

> <r_psp_Complex_Coulomb>
-26486.0767805712

> <r_psp_Complex_Covalent>
4424.69024818445

> <r_psp_Complex_Hbond>
-550.407115830834

> <r_psp_Complex_Lipo>
-2178.3427151667

> <r_psp_Complex_Packing>
-55.8446426458479

> <r_psp_Complex_SelfCont>
-40.4078915603482

> <r_psp_Complex_Solv_GB>
-5187.41025583592

> <r_psp_Complex_vdW>
-4050.14978673674

> <r_psp_Receptor_Energy>
-34095.2510407338

> <r_psp_Receptor_Coulomb>
-26458.915813943

> <r_psp_Receptor_Covalent>
4390.40652582141

> <r_psp_Receptor_Hbond>
-550.097605083181

> <r_psp_Receptor_Lipo>
-2150.52463233748

> <r_psp_Receptor_Packing>
-55.8446424272089

> <r_psp_Receptor_SelfCont>
-40.4078915603482

> <r_psp_Receptor_Solv_GB>
-5206.55178036259

> <r_psp_Receptor_vdW>
-4023.31520084149

> <r_psp_MMGBSA_dG_Bind(NS)>
-43.2032969287102

> <r_psp_MMGBSA_dG_Bind(NS)_Coulomb>
-7.87462691659312

> <r_psp_MMGBSA_dG_Bind(NS)_Covalent>
-0.000200868111278396

> <r_psp_MMGBSA_dG_Bind(NS)_Hbond>
-0.309510747652553

> <r_psp_MMGBSA_dG_Bind(NS)_Lipo>
-26.0227449372328

> <r_psp_MMGBSA_dG_Bind(NS)_Packing>
-2.18639073068516e-007

> <r_psp_MMGBSA_dG_Bind(NS)_SelfCont>
0

> <r_psp_MMGBSA_dG_Bind(NS)_Solv_GB>
29.4378807444173

> <r_psp_MMGBSA_dG_Bind(NS)_vdW>
-38.4340939848921

> <r_psp_Rec_Strain_Energy>
-5.0931703299284e-011

> <r_psp_Rec_Strain_Coulomb>
4.00177668780088e-011

> <r_psp_Rec_Strain_Covalent>
-9.09494701772928e-013

> <r_psp_Rec_Strain_Hbond>
-2.27373675443232e-013

> <r_psp_Rec_Strain_Lipo>
-5.00222085975111e-012

> <r_psp_Rec_Strain_Packing>
4.9737991503207e-014

> <r_psp_Rec_Strain_SelfCont>
7.105427357601e-015

> <r_psp_Rec_Strain_Solv_GB>
-1.81898940354586e-012

> <r_psp_Rec_Strain_vdW>
4.54747350886464e-012

> <r_psp_Prime_MMGBSA_ligand_efficiency>
-1.39891991237033

> <r_psp_Prime_MMGBSA_ligand_efficiency_sa>
-2.09837986855549

> <r_psp_Prime_MMGBSA_ligand_efficiency_ln>
-8.2896485369656

> <r_i_glide_lipo>
-5.51780206765622

> <r_i_glide_hbond>
-0.0086970035003234

> <r_i_glide_metal>
0

> <r_i_glide_rewards>
-2.19393168286565

> <r_i_glide_erotb>
0.834305371316917

> <r_i_glide_esite>
0

> <i_psp_ExecuteFunction_Internal_Entry_Index>
87

> <i_qp_#stars>
0

> <i_qp_#amine>
0

> <i_qp_#amidine>
0

> <i_qp_#acid>
0

> <i_qp_#amide>
0

> <i_qp_#rotor>
4

> <i_qp_#rtvFG>
0

> <i_qp_CNS>
-1

> <r_qp_mol_MW>
   336.436

> <r_qp_dipole>
     4.933

> <r_qp_SASA>
   662.355

> <r_qp_FOSA>
   366.310

> <r_qp_FISA>
    88.426

> <r_qp_PISA>
   207.620

> <r_qp_WPSA>
     0.000

> <r_qp_volume>
  1148.484

> <r_qp_donorHB>
     3.000

> <r_qp_accptHB>
     3.500

> <r_qp_dip^2/V>
   0.0211922

> <r_qp_ACxDN^.5/SA>
   0.0091525

> <r_qp_glob>
   0.8007386

> <r_qp_QPpolrz>
    39.223

> <r_qp_QPlogPC16>
    11.657

> <r_qp_QPlogPoct>
    19.094

> <r_qp_QPlogPw>
    10.286

> <r_qp_QPlogPo/w>
     4.221

> <r_qp_QPlogS>
    -5.995

> <r_qp_CIQPlogS>
    -5.228

> <r_qp_QPlogHERG>
    -5.746

> <r_qp_QPPCaco>
  1436.676

> <r_qp_QPlogBB>
    -0.597

> <r_qp_QPPMDCK>
   731.874

> <r_qp_QPlogKp>
    -2.034

> <r_qp_IP(eV)>
     8.236

> <r_qp_EA(eV)>
     0.248

> <i_qp_#metab>
2

> <r_qp_QPlogKhsa>
     0.688

> <i_qp_HumanOralAbsorption>
3

> <r_qp_PercentHumanOralAbsorption>
   100.000

> <r_qp_SAfluorine>
     0.000

> <r_qp_SAamideO>
     0.000

> <r_qp_PSA>
    78.056

> <i_qp_#NandO>
5

> <i_qp_RuleOfFive>
0

> <i_qp_RuleOfThree>
1

> <i_qp_#ringatoms>
20

> <i_qp_#in34>
0

> <i_qp_#in56>
20

> <i_qp_#noncon>
6

> <i_qp_#nonHatm>
25

> <r_qp_Jm>
0.00314794397675785

> <s_m_subgroupid>
1000_str-imp1->adme_1000-out12

> <s_m_subgroup_title>
1000_str->adme_1000-out1

> <b_m_subgroup_collapsed>
0

$$$$
ind_1,476050
                    3D
 Structure written by MMmdl.
 49 52  0  0  1  0            999 V2000
   -3.3273   -1.3793   -0.1317 C   0  0  0  0  0  0
   -2.1712   -0.5911   -0.1375 C   0  0  0  0  0  0
   -0.8761   -1.1297    0.1066 C   0  0  0  0  0  0
   -0.7611   -2.5082    0.3584 C   0  0  0  0  0  0
   -1.9108   -3.2958    0.3690 C   0  0  0  0  0  0
   -3.1644   -2.7400    0.1288 C   0  0  0  0  0  0
    0.0663   -0.0456    0.0094 C   0  0  0  0  0  0
   -0.6756    1.1223   -0.2289 C   0  0  0  0  0  0
   -1.9964    0.7549   -0.3616 N   0  0  0  0  0  0
   -0.2543    2.4902   -0.4433 C   0  0  0  0  0  0
    0.9416    2.7966    0.0923 N   0  0  0  0  0  0
   -0.9702    3.3008   -1.0353 O   0  0  0  0  0  0
    1.6114    4.0960    0.0363 C   0  0  0  0  0  0
    2.7427    4.2269    1.0843 C   0  0  0  0  0  0
    3.4809    5.5788    1.0347 C   0  0  0  0  0  0
    3.9672    5.9235   -0.3820 C   0  0  0  0  0  0
    2.8069    5.8976   -1.3901 C   0  0  0  0  0  0
    2.0527    4.5533   -1.3803 C   0  0  0  0  0  0
   -4.3057   -0.9619   -0.3190 H   0  0  0  0  0  0
    0.2044   -2.9564    0.5420 H   0  0  0  0  0  0
   -1.8279   -4.3551    0.5639 H   0  0  0  0  0  0
   -4.0338   -3.3809    0.1424 H   0  0  0  0  0  0
   -2.7152    1.4319   -0.5741 H   0  0  0  0  0  0
    1.4867    2.0398    0.4799 H   0  0  0  0  0  0
    0.8661    4.8301    0.3530 H   0  0  0  0  0  0
    2.3468    4.0687    2.0886 H   0  0  0  0  0  0
    3.4774    3.4392    0.9072 H   0  0  0  0  0  0
    2.8149    6.3671    1.3893 H   0  0  0  0  0  0
    4.3259    5.5644    1.7242 H   0  0  0  0  0  0
    4.4394    6.9067   -0.3841 H   0  0  0  0  0  0
    4.7370    5.2138   -0.6889 H   0  0  0  0  0  0
    2.1089    6.7039   -1.1585 H   0  0  0  0  0  0
    3.1828    6.1035   -2.3931 H   0  0  0  0  0  0
    2.7153    3.7971   -1.8029 H   0  0  0  0  0  0
    1.1919    4.6255   -2.0461 H   0  0  0  0  0  0
    1.6954   -1.0766    2.6325 C   0  0  0  0  0  0
    2.2209   -0.6426    1.2815 C   0  0  0  0  0  0
    1.5121   -0.1923    0.1499 C   0  0  0  0  0  0
    2.4789    0.0738   -0.8131 C   0  0  0  0  0  0
    2.4193    0.5608   -2.2419 C   0  0  0  0  0  0
    3.6602   -0.2198   -0.1903 N   0  0  0  0  0  0
    3.5171   -0.6507    1.0638 N   0  0  0  0  0  0
    4.5690   -0.1313   -0.6212 H   0  0  0  0  0  0
    0.6169   -0.9436    2.7178 H   0  0  0  0  0  0
    2.1474   -0.5065    3.4447 H   0  0  0  0  0  0
    1.9016   -2.1301    2.8231 H   0  0  0  0  0  0
    1.3991    0.7826   -2.5554 H   0  0  0  0  0  0
    2.8127   -0.1822   -2.9356 H   0  0  0  0  0  0
    3.0022    1.4706   -2.3814 H   0  0  0  0  0  0
  1  2  2  0  0  0
  1  6  1  0  0  0
  1 19  1  0  0  0
  2  3  1  0  0  0
  2  9  1  0  0  0
  3  4  2  0  0  0
  3  7  1  0  0  0
  4  5  1  0  0  0
  4 20  1  0  0  0
  5  6  2  0  0  0
  5 21  1  0  0  0
  6 22  1  0  0  0
  7  8  2  0  0  0
  7 38  1  0  0  0
  8  9  1  0  0  0
  8 10  1  0  0  0
  9 23  1  0  0  0
 10 11  1  0  0  0
 10 12  2  0  0  0
 11 13  1  0  0  0
 11 24  1  0  0  0
 13 18  1  0  0  0
 13 14  1  0  0  0
 13 25  1  0  0  0
 14 15  1  0  0  0
 14 26  1  0  0  0
 14 27  1  0  0  0
 15 16  1  0  0  0
 15 28  1  0  0  0
 15 29  1  0  0  0
 16 17  1  0  0  0
 16 30  1  0  0  0
 16 31  1  0  0  0
 17 18  1  0  0  0
 17 32  1  0  0  0
 17 33  1  0  0  0
 18 34  1  0  0  0
 18 35  1  0  0  0
 36 37  1  0  0  0
 36 44  1  0  0  0
 36 45  1  0  0  0
 36 46  1  0  0  0
 37 42  2  0  0  0
 37 38  1  0  0  0
 38 39  2  0  0  0
 39 40  1  0  0  0
 39 41  1  0  0  0
 40 47  1  0  0  0
 40 48  1  0  0  0
 40 49  1  0  0  0
 41 42  1  0  0  0
 41 43  1  0  0  0
M  END
> <s_m_entry_id>
7582

> <s_m_entry_name>
entry

> <i_f3d_flags>
0

> <s_m_job_name>
adme_1000

> <r_psp_Prime_Energy>
-34131.3240787881

> <r_psp_Prime_Solv_GB>
-5189.18489162924

> <r_psp_Prime_Coulomb>
-26480.875255845

> <r_psp_Prime_vdW>
-4062.7030954775

> <r_psp_Prime_Covalent>
4424.83704035753

> <i_psp_model_num>
0

> <r_psp_Prime_Lipo>
-2177.02397413805

> <s_psp_Prime_Energy_Force_Field>
S-OPLS

> <s_psp_Prime_Energy_Solvent_Model>
VSGB2.1

> <r_psp_Prime_Hbond>
-550.121368068248

> <r_psp_Prime_Packing>
-55.8446424272089

> <r_psp_Prime_SelfCont>
-40.4078915603482

> <r_psp_Memb1_x>
103.457542316003

> <r_psp_Memb1_y>
39.4731108300965

> <r_psp_Memb1_z>
48.7987221124676

> <r_psp_Memb2_x>
99.8134167309003

> <r_psp_Memb2_y>
2.81176945184187

> <r_psp_Memb2_z>
23.8404289603493

> <r_psp_MembDummyRadius>
4.45

> <r_psp_Prime_Bond_Covalent>
467.928452995148

> <r_psp_Prime_Bond_SGB>
49974.6292823092

> <r_psp_Prime_Angle_Covalent>
2224.48030212221

> <r_psp_Prime_Angle_SGB>
-21653.6704347099

> <r_psp_Prime_Torsion_Covalent>
1732.42828524018

> <r_psp_Prime_NB14_LJ>
4237.11305765015

> <r_psp_Prime_NB14_Lipo>
0

> <r_psp_Prime_NB14_Elec>
25570.6977668288

> <r_psp_Prime_NB14_SGB>
-15630.3057500657

> <r_psp_Prime_NBShort_LJ>
-7884.60533605591

> <r_psp_Prime_NBShort_Lipo>
-2177.02397413805

> <r_psp_Prime_NBShort_Elec>
-53069.5446557002

> <r_psp_Prime_NBShort_SGB>
18029.2752740006

> <r_psp_Prime_NBLong_LJ>
-415.210817071738

> <r_psp_Prime_NBLong_Lipo>
0

> <r_psp_Prime_NBLong_Elec>
1017.97163302646

> <r_psp_Prime_NBLong_SGB>
-1163.77856441602

> <r_psp_Prime_Self_SGB>
-34745.3346987474

> <s_m_Source_Path>
F:\Dekstop_files\DAC4,5\Molecular Systems Desgn and Engineering\supplementary_str

> <s_m_Source_File>
1000_str.mae

> <i_m_Source_File_Index>
506

> <i_lp_mmshare_version>
53156

> <s_epik_input>
W2NIXTFbY0hdW2NIXVtjSF1jKGMxMiljKC1jKGMzW0NIM10pYyhbQ0gzXSlbbkhdbjMpYyhbbkhdMilDKD1PKVtOSF1bQ0hdNFtDSDJdW0NIMl1bQ0gyXVtDSDJdW0NIMl00

> <s_epik_cmdline>
J2VwaWtfcHl0aG9uJywgJy1waHQnLCAnMC4wJywgJy1waCcsICc3LjAnLCAnLXRuJywgJzgnLCAnLW1hJywgJzUwMCcsICctaW1hZScsICc8aW5maWxlLm1hZT4nLCAnLW9tYWUnLCAnPG91dGZpbGUubWFlPic=

> <r_lp_tautomer_probability>
1

> <r_epik_Ionization_Penalty>
  0.0002

> <r_epik_Ionization_Penalty_Charging>
  0.0000

> <r_epik_Ionization_Penalty_Neutral>
  0.0002

> <r_epik_State_Penalty>
  0.0000

> <r_epik_Charging_Adjusted_Penalty>
0

> <i_epik_Tot_Q>
0

> <i_epik_Tot_abs_Q>
0

> <s_lp_Force_Field>
S-OPLS

> <r_lp_Energy>
28.97845

> <b_lp_Chiralities_Consistent>
1

> <s_lp_Variant>
ind_1,476050-1

> <s_i_glide_gridfile>
glide-grid_mmpl3

> <i_i_glide_lignum>
569

> <i_i_glide_rotatable_bonds>
4

> <r_i_docking_score>
-8.47660839037682

> <r_i_glide_ligand_efficiency>
-0.339064335615073

> <r_i_glide_ligand_efficiency_sa>
-0.99143013067007

> <r_i_glide_ligand_efficiency_ln>
-2.00921021197433

> <r_i_glide_gscore>
-8.47660839037682

> <r_i_glide_evdw>
-41.9252853393555

> <r_i_glide_ecoul>
-0.93387246131897

> <r_i_glide_energy>
-42.8591578006744

> <r_i_glide_einternal>
4.58964729309082

> <r_i_glide_emodel>
-56.0208208861804

> <i_i_glide_confnum>
73

> <i_i_glide_posenum>
308

> <r_i_glide_eff_state_penalty>
0

> <i_rge_num_r_groups>
1

> <r_rge_occupation_R1>
1

> <s_rge_R1>
476050

> <s_rge_R1_s_m_title>
476050

> <s_rge_R1_s_m_entry_id>
16392

> <s_rge_R1_s_m_entry_name>
eMol_BB_r-groups.233

> <s_rge_R1_s_m_smiles>
[*]c1c(C)n[nH]c1C

> <b_rge_R1_b_sd_chiral_flag>
0

> <i_rge_R1_i_sd_version>
0

> <s_rge_R1_s_m_Source_File>
eMol_BB_r-groups-dedup.mae

> <i_rge_R1_i_m_Source_File_Index>
160

> <s_rge_R1_s_m_Source_Path>
/Users/konze/projects/pathfinder/r-groups

> <s_rge_R1_s_sd_Source_Path>
/Users/konze/projects/pathfinder/reactant sets/eMolecules

> <s_rge_R1_s_sd_Source_File>
eMol BB r-groups.mae

> <i_rge_R1_i_sd_Source_File_Index>
233

> <r_rge_R1_r_sd_MW>
96.1304

> <i_rge_R1_i_sd_RB>
0

> <i_rge_R1_i_sd_HeavyAtomCount>
7

> <i_rge_R1_i_sd_HBA>
1

> <i_rge_R1_i_sd_HBD>
1

> <r_rge_R1_r_sd_PSA>
28.68

> <i_rge_R1_i_sd_ChiralCenterCount>
0

> <i_rge_R1_i_sd_ChiralCenterCountAllPossible>
0

> <i_rge_R1_i_sd_RingCount>
1

> <r_rge_R1_r_sd_AlogP>
0.3686

> <s_rge_R1_s_sd_subgroup_title>
eMol BB r-groups

> <s_rge_R1_s_sd_subgroupid>
eMol BB r-groups

> <i_rge_R1_i_sd_subgroup_collapsed>
0

> <s_rge_R1_s_sd_Unique_SMILES_Stereo>
Cc1cc(C)[nH]n1

> <i_rge_R1_i_sd_canvasUID>
178

> <s_rge_R1_s_canvas_Unique_SMILES_Stereo>
Cc1cc(C)[nH]n1

> <s_psp_Prime_MMGBSA_Input_Structure_Hash>
c658defc16544ba9edfa0af166bd72715eb40c733a2505b2e1a9b6c8

> <i_psp_number_heavy_atoms>
25

> <r_psp_MMGBSA_dG_Bind>
-41.5516769087917

> <r_psp_MMGBSA_dG_Bind_Coulomb>
-6.55197881899221

> <r_psp_MMGBSA_dG_Bind_Covalent>
8.12908803798928

> <r_psp_MMGBSA_dG_Bind_Hbond>
-0.0237629850666963

> <r_psp_MMGBSA_dG_Bind_Lipo>
-24.3739333408321

> <r_psp_MMGBSA_dG_Bind_Packing>
4.9737991503207e-014

> <r_psp_MMGBSA_dG_Bind_SelfCont>
7.105427357601e-015

> <r_psp_MMGBSA_dG_Bind_Solv_GB>
29.064995437926

> <r_psp_MMGBSA_dG_Bind_vdW>
-47.7960852397268

> <r_psp_Lig_Strain_Energy>
8.73707284007362

> <r_psp_Lig_Strain_Coulomb>
-1.18205153561164

> <r_psp_Lig_Strain_Covalent>
8.12928890610423

> <r_psp_Lig_Strain_Hbond>
0

> <r_psp_Lig_Strain_Lipo>
0.168661578475413

> <r_psp_Lig_Strain_Packing>
0

> <r_psp_Lig_Strain_SelfCont>
0

> <r_psp_Lig_Strain_Solv_GB>
0.380408099126541

> <r_psp_Lig_Strain_vdW>
1.24076579197907

> <r_psp_Ligand_Energy>
5.47863885451152

> <r_psp_Ligand_Coulomb>
-15.407463083027

> <r_psp_Ligand_Covalent>
26.3014264981336

> <r_psp_Ligand_Hbond>
0

> <r_psp_Ligand_Lipo>
-2.12540845973756

> <r_psp_Ligand_Packing>
0

> <r_psp_Ligand_SelfCont>
0

> <r_psp_Ligand_Solv_GB>
-11.6981067045763

> <r_psp_Ligand_vdW>
8.40819060371878

> <r_psp_Complex_Energy>
-34131.3240787881

> <r_psp_Complex_Coulomb>
-26480.875255845

> <r_psp_Complex_Covalent>
4424.83704035753

> <r_psp_Complex_Hbond>
-550.121368068248

> <r_psp_Complex_Lipo>
-2177.02397413805

> <r_psp_Complex_Packing>
-55.8446424272089

> <r_psp_Complex_SelfCont>
-40.4078915603482

> <r_psp_Complex_Solv_GB>
-5189.18489162924

> <r_psp_Complex_vdW>
-4062.7030954775

> <r_psp_Receptor_Energy>
-34095.2510407338

> <r_psp_Receptor_Coulomb>
-26458.915813943

> <r_psp_Receptor_Covalent>
4390.40652582141

> <r_psp_Receptor_Hbond>
-550.097605083181

> <r_psp_Receptor_Lipo>
-2150.52463233748

> <r_psp_Receptor_Packing>
-55.8446424272089

> <r_psp_Receptor_SelfCont>
-40.4078915603482

> <r_psp_Receptor_Solv_GB>
-5206.55178036259

> <r_psp_Receptor_vdW>
-4023.31520084149

> <r_psp_MMGBSA_dG_Bind(NS)>
-50.2887497488118

> <r_psp_MMGBSA_dG_Bind(NS)_Coulomb>
-5.36992728342011

> <r_psp_MMGBSA_dG_Bind(NS)_Covalent>
-0.00020086811400688

> <r_psp_MMGBSA_dG_Bind(NS)_Hbond>
-0.0237629850664689

> <r_psp_MMGBSA_dG_Bind(NS)_Lipo>
-24.5425949193027

> <r_psp_MMGBSA_dG_Bind(NS)_Packing>
0

> <r_psp_MMGBSA_dG_Bind(NS)_SelfCont>
0

> <r_psp_MMGBSA_dG_Bind(NS)_Solv_GB>
28.6845873388011

> <r_psp_MMGBSA_dG_Bind(NS)_vdW>
-49.0368510317107

> <r_psp_Rec_Strain_Energy>
-5.0931703299284e-011

> <r_psp_Rec_Strain_Coulomb>
4.00177668780088e-011

> <r_psp_Rec_Strain_Covalent>
-9.09494701772928e-013

> <r_psp_Rec_Strain_Hbond>
-2.27373675443232e-013

> <r_psp_Rec_Strain_Lipo>
-5.00222085975111e-012

> <r_psp_Rec_Strain_Packing>
4.9737991503207e-014

> <r_psp_Rec_Strain_SelfCont>
7.105427357601e-015

> <r_psp_Rec_Strain_Solv_GB>
-1.81898940354586e-012

> <r_psp_Rec_Strain_vdW>
4.54747350886464e-012

> <r_psp_Prime_MMGBSA_ligand_efficiency>
-1.66206707635167

> <r_psp_Prime_MMGBSA_ligand_efficiency_sa>
-2.4931006145275

> <r_psp_Prime_MMGBSA_ligand_efficiency_ln>
-9.84899263065885

> <r_i_glide_lipo>
-4.82789696237573

> <r_i_glide_hbond>
0

> <r_i_glide_metal>
0

> <r_i_glide_rewards>
-2.07981058888901

> <r_i_glide_erotb>
0.667444297053534

> <r_i_glide_esite>
0

> <i_psp_ExecuteFunction_Internal_Entry_Index>
1115

> <i_qp_#stars>
0

> <i_qp_#amine>
0

> <i_qp_#amidine>
0

> <i_qp_#acid>
0

> <i_qp_#amide>
0

> <i_qp_#rotor>
2

> <i_qp_#rtvFG>
0

> <i_qp_CNS>
-1

> <r_qp_mol_MW>
   336.436

> <r_qp_dipole>
     2.775

> <r_qp_SASA>
   602.847

> <r_qp_FOSA>
   333.056

> <r_qp_FISA>
   108.394

> <r_qp_PISA>
   161.397

> <r_qp_WPSA>
     0.000

> <r_qp_volume>
  1097.717

> <r_qp_donorHB>
     3.000

> <r_qp_accptHB>
     3.500

> <r_qp_dip^2/V>
   0.0070127

> <r_qp_ACxDN^.5/SA>
   0.0100559

> <r_qp_glob>
   0.8536603

> <r_qp_QPpolrz>
    38.034

> <r_qp_QPlogPC16>
    11.022

> <r_qp_QPlogPoct>
    18.760

> <r_qp_QPlogPw>
    10.405

> <r_qp_QPlogPo/w>
     3.737

> <r_qp_QPlogS>
    -5.283

> <r_qp_CIQPlogS>
    -5.228

> <r_qp_QPlogHERG>
    -4.670

> <r_qp_QPPCaco>
   928.966

> <r_qp_QPlogBB>
    -0.549

> <r_qp_QPPMDCK>
   456.838

> <r_qp_QPlogKp>
    -2.757

> <r_qp_IP(eV)>
     8.256

> <r_qp_EA(eV)>
     0.426

> <i_qp_#metab>
2

> <r_qp_QPlogKhsa>
     0.665

> <i_qp_HumanOralAbsorption>
3

> <r_qp_PercentHumanOralAbsorption>
   100.000

> <r_qp_SAfluorine>
     0.000

> <r_qp_SAamideO>
     0.000

> <r_qp_PSA>
    76.423

> <i_qp_#NandO>
5

> <i_qp_RuleOfFive>
0

> <i_qp_RuleOfThree>
0

> <i_qp_#ringatoms>
20

> <i_qp_#in34>
0

> <i_qp_#in56>
20

> <i_qp_#noncon>
6

> <i_qp_#nonHatm>
25

> <r_qp_Jm>
0.00306858640987961

> <s_m_subgroupid>
1000_str-imp1->adme_1000-out12

> <s_m_subgroup_title>
1000_str->adme_1000-out1

> <b_m_subgroup_collapsed>
0

$$$$
ind_1,476090
                    3D
 Structure written by MMmdl.
 48 50  0  0  1  0            999 V2000
    2.3648    4.0195   -3.1230 C   0  0  0  0  0  0
    2.6070    2.9507   -2.2533 C   0  0  0  0  0  0
    1.5787    2.3254   -1.4852 C   0  0  0  0  0  0
    0.2672    2.8263   -1.6228 C   0  0  0  0  0  0
    0.0229    3.8917   -2.4866 C   0  0  0  0  0  0
    1.0512    4.4734   -3.2192 C   0  0  0  0  0  0
    2.2123    1.2678   -0.7186 C   0  0  0  0  0  0
    3.5787    1.3004   -1.0230 C   0  0  0  0  0  0
    3.7780    2.2992   -1.9518 N   0  0  0  0  0  0
    4.6418    0.4365   -0.5376 C   0  0  0  0  0  0
    5.8924    0.8211   -0.8677 N   0  0  0  0  0  0
    4.3961   -0.5756    0.1210 O   0  0  0  0  0  0
    7.1286    0.1344   -0.4862 C   0  0  0  0  0  0
    8.3299    0.5089   -1.3881 C   0  0  0  0  0  0
    9.6473   -0.1830   -0.9854 C   0  0  0  0  0  0
    9.9686    0.0016    0.5063 C   0  0  0  0  0  0
    8.8069   -0.4809    1.3891 C   0  0  0  0  0  0
    7.4727    0.2006    1.0262 C   0  0  0  0  0  0
    3.1549    4.4799   -3.6977 H   0  0  0  0  0  0
   -0.5614    2.4054   -1.0787 H   0  0  0  0  0  0
   -0.9828    4.2724   -2.5897 H   0  0  0  0  0  0
    0.8253    5.2981   -3.8795 H   0  0  0  0  0  0
    4.6912    2.4950   -2.3350 H   0  0  0  0  0  0
    6.0106    1.7134   -1.3233 H   0  0  0  0  0  0
    6.9630   -0.9258   -0.6946 H   0  0  0  0  0  0
    8.1058    0.2764   -2.4303 H   0  0  0  0  0  0
    8.4903    1.5867   -1.3318 H   0  0  0  0  0  0
    9.5793   -1.2483   -1.2111 H   0  0  0  0  0  0
   10.4681    0.2026   -1.5913 H   0  0  0  0  0  0
   10.8793   -0.5418    0.7608 H   0  0  0  0  0  0
   10.1730    1.0537    0.7106 H   0  0  0  0  0  0
    8.6994   -1.5617    1.2849 H   0  0  0  0  0  0
    9.0400   -0.3010    2.4393 H   0  0  0  0  0  0
    7.5386    1.2477    1.3257 H   0  0  0  0  0  0
    6.6746   -0.2471    1.6197 H   0  0  0  0  0  0
   -0.5185   -0.5326   -0.8139 C   0  0  0  0  0  0
    0.1608    0.1594    0.3833 C   0  0  2  0  0  0
    1.5813    0.4073    0.1569 N   0  0  0  0  0  0
   -0.1110   -0.6153    1.6954 C   0  0  0  0  0  0
    0.6202   -0.1141    2.7994 O   0  0  0  0  0  0
   -0.3057    1.1318    0.5301 H   0  0  0  0  0  0
   -1.5892   -0.6519   -0.6454 H   0  0  0  0  0  0
   -0.0975   -1.5231   -0.9910 H   0  0  0  0  0  0
   -0.3987    0.0393   -1.7339 H   0  0  0  0  0  0
    2.1464   -0.2814    0.6338 H   0  0  0  0  0  0
   -1.1677   -0.5392    1.9540 H   0  0  0  0  0  0
    0.1063   -1.6776    1.5763 H   0  0  0  0  0  0
    0.4018   -0.6369    3.5743 H   0  0  0  0  0  0
  1  2  2  0  0  0
  1  6  1  0  0  0
  1 19  1  0  0  0
  2  3  1  0  0  0
  2  9  1  0  0  0
  3  4  2  0  0  0
  3  7  1  0  0  0
  4  5  1  0  0  0
  4 20  1  0  0  0
  5  6  2  0  0  0
  5 21  1  0  0  0
  6 22  1  0  0  0
  7  8  2  0  0  0
  7 38  1  0  0  0
  8  9  1  0  0  0
  8 10  1  0  0  0
  9 23  1  0  0  0
 10 11  1  0  0  0
 10 12  2  0  0  0
 11 13  1  0  0  0
 11 24  1  0  0  0
 13 18  1  0  0  0
 13 14  1  0  0  0
 13 25  1  0  0  0
 14 15  1  0  0  0
 14 26  1  0  0  0
 14 27  1  0  0  0
 15 16  1  0  0  0
 15 28  1  0  0  0
 15 29  1  0  0  0
 16 17  1  0  0  0
 16 30  1  0  0  0
 16 31  1  0  0  0
 17 18  1  0  0  0
 17 32  1  0  0  0
 17 33  1  0  0  0
 18 34  1  0  0  0
 18 35  1  0  0  0
 36 37  1  0  0  0
 36 42  1  0  0  0
 36 43  1  0  0  0
 36 44  1  0  0  0
 37 38  1  0  0  0
 37 39  1  0  0  0
 37 41  1  0  0  0
 38 45  1  0  0  0
 39 40  1  0  0  0
 39 46  1  0  0  0
 39 47  1  0  0  0
 40 48  1  0  0  0
M  END
> <s_m_entry_id>
7235

> <s_m_entry_name>
entry

> <i_f3d_flags>
0

> <s_m_job_name>
adme_1000

> <r_psp_Prime_Energy>
-34108.2310735851

> <r_psp_Prime_Solv_GB>
-5184.89408450024

> <r_psp_Prime_Coulomb>
-26464.2799743075

> <r_psp_Prime_vdW>
-4053.50669757663

> <r_psp_Prime_Covalent>
4415.7600168539

> <i_psp_model_num>
0

> <r_psp_Prime_Lipo>
-2174.15076641426

> <s_psp_Prime_Energy_Force_Field>
S-OPLS

> <s_psp_Prime_Energy_Solvent_Model>
VSGB2.1

> <r_psp_Prime_Hbond>
-550.907033652831

> <r_psp_Prime_Packing>
-55.8446424272089

> <r_psp_Prime_SelfCont>
-40.4078915603482

> <r_psp_Memb1_x>
103.457542316003

> <r_psp_Memb1_y>
39.4731108300965

> <r_psp_Memb1_z>
48.7987221124676

> <r_psp_Memb2_x>
99.8134167309003

> <r_psp_Memb2_y>
2.81176945184187

> <r_psp_Memb2_z>
23.8404289603493

> <r_psp_MembDummyRadius>
4.45

> <r_psp_Prime_Bond_Covalent>
467.310630264797

> <r_psp_Prime_Bond_SGB>
49983.5331354279

> <r_psp_Prime_Angle_Covalent>
2222.89344663134

> <r_psp_Prime_Angle_SGB>
-21649.7295458196

> <r_psp_Prime_Torsion_Covalent>
1725.55593995776

> <r_psp_Prime_NB14_LJ>
4239.64541604069

> <r_psp_Prime_NB14_Lipo>
0

> <r_psp_Prime_NB14_Elec>
25594.8309119336

> <r_psp_Prime_NB14_SGB>
-15634.3050539017

> <r_psp_Prime_NBShort_LJ>
-7878.55675699578

> <r_psp_Prime_NBShort_Lipo>
-2174.15076641426

> <r_psp_Prime_NBShort_Elec>
-53076.2603089979

> <r_psp_Prime_NBShort_SGB>
18029.6727739552

> <r_psp_Prime_NBLong_LJ>
-414.595356621546

> <r_psp_Prime_NBLong_Lipo>
0

> <r_psp_Prime_NBLong_Elec>
1017.14942275684

> <r_psp_Prime_NBLong_SGB>
-1162.07563915751

> <r_psp_Prime_Self_SGB>
-34751.9897550045

> <s_m_Source_Path>
F:\Dekstop_files\DAC4,5\Molecular Systems Desgn and Engineering\supplementary_str

> <s_m_Source_File>
1000_str.mae

> <i_m_Source_File_Index>
159

> <i_lp_mmshare_version>
53156

> <s_epik_input>
W2NIXTFbY0hdW2NIXVtjSF1jKGMxMiljKFtOSF1bQ0BASF0oW0NIM10pW0NIMl1bT0hdKWMoW25IXTIpQyg9TylbTkhdW0NIXTNbQ0gyXVtDSDJdW0NIMl1bQ0gyXVtDSDJdMw==

> <s_epik_cmdline>
J2VwaWtfcHl0aG9uJywgJy1waHQnLCAnMC4wJywgJy1waCcsICc3LjAnLCAnLXRuJywgJzgnLCAnLW1hJywgJzUwMCcsICctaW1hZScsICc8aW5maWxlLm1hZT4nLCAnLW9tYWUnLCAnPG91dGZpbGUubWFlPic=

> <r_lp_tautomer_probability>
1

> <r_epik_Ionization_Penalty>
  0.0000

> <r_epik_Ionization_Penalty_Charging>
  0.0000

> <r_epik_Ionization_Penalty_Neutral>
  0.0000

> <r_epik_State_Penalty>
  0.0000

> <r_epik_Charging_Adjusted_Penalty>
0

> <i_epik_Tot_Q>
0

> <i_epik_Tot_abs_Q>
0

> <s_lp_Force_Field>
S-OPLS

> <r_lp_Energy>
36.513265

> <b_lp_Chiralities_Consistent>
1

> <s_lp_Variant>
ind_1,476090-1

> <s_i_glide_gridfile>
glide-grid_mmpl3

> <i_i_glide_lignum>
2425

> <i_i_glide_rotatable_bonds>
7

> <r_i_docking_score>
-8.27670542049021

> <r_i_glide_ligand_efficiency>
-0.359856757412618

> <r_i_glide_ligand_efficiency_sa>
-1.02338474881259

> <r_i_glide_ligand_efficiency_ln>
-2.00138241968998

> <r_i_glide_gscore>
-8.27670542049021

> <r_i_glide_evdw>
-38.9413108825684

> <r_i_glide_ecoul>
-3.57671904563904

> <r_i_glide_energy>
-42.5180299282074

> <r_i_glide_einternal>
6.36721563339233

> <r_i_glide_emodel>
-58.0141616446708

> <i_i_glide_confnum>
100

> <i_i_glide_posenum>
261

> <r_i_glide_eff_state_penalty>
0

> <i_rge_num_r_groups>
1

> <r_rge_occupation_R1>
1

> <s_rge_R1>
476090

> <s_rge_R1_s_m_title>
476090

> <s_rge_R1_s_m_entry_id>
18002

> <s_rge_R1_s_m_entry_name>
eMol_BB_r-groups.1012

> <s_rge_R1_s_m_smiles>
[*]NC(C)CO

> <b_rge_R1_b_sd_chiral_flag>
0

> <i_rge_R1_i_sd_version>
0

> <s_rge_R1_s_m_Source_File>
eMol_BB_r-groups-dedup.mae

> <i_rge_R1_i_m_Source_File_Index>
838

> <s_rge_R1_s_m_Source_Path>
/Users/konze/projects/pathfinder/r-groups

> <s_rge_R1_s_sd_Source_Path>
/Users/konze/projects/pathfinder/reactant sets/eMolecules

> <s_rge_R1_s_sd_Source_File>
eMol BB r-groups.mae

> <i_rge_R1_i_sd_Source_File_Index>
1012

> <r_rge_R1_r_sd_MW>
75.1097

> <i_rge_R1_i_sd_RB>
1

> <i_rge_R1_i_sd_HeavyAtomCount>
5

> <i_rge_R1_i_sd_HBA>
1

> <i_rge_R1_i_sd_HBD>
1

> <r_rge_R1_r_sd_PSA>
46.25

> <i_rge_R1_i_sd_ChiralCenterCount>
1

> <i_rge_R1_i_sd_ChiralCenterCountAllPossible>
1

> <i_rge_R1_i_sd_RingCount>
0

> <r_rge_R1_r_sd_AlogP>
-0.8095

> <s_rge_R1_s_sd_subgroup_title>
eMol BB r-groups

> <s_rge_R1_s_sd_subgroupid>
eMol BB r-groups

> <i_rge_R1_i_sd_subgroup_collapsed>
0

> <s_rge_R1_s_sd_Unique_SMILES_Stereo>
CC(N)CO

> <i_rge_R1_i_sd_canvasUID>
953

> <s_rge_R1_s_canvas_Unique_SMILES_Stereo>
CC(N)CO

> <s_psp_Prime_MMGBSA_Input_Structure_Hash>
ecabc1b842c6071d4560bf597da550629d16b378013f4c72779fe7a1

> <i_psp_number_heavy_atoms>
23

> <r_psp_MMGBSA_dG_Bind>
-44.0818292919867

> <r_psp_MMGBSA_dG_Bind_Coulomb>
-12.9238831492257

> <r_psp_MMGBSA_dG_Bind_Covalent>
1.75678429472464

> <r_psp_MMGBSA_dG_Bind_Hbond>
-0.80942856964964

> <r_psp_MMGBSA_dG_Bind_Lipo>
-22.2190044576801

> <r_psp_MMGBSA_dG_Bind_Packing>
4.9737991503207e-014

> <r_psp_MMGBSA_dG_Bind_SelfCont>
7.105427357601e-015

> <r_psp_MMGBSA_dG_Bind_Solv_GB>
33.3800139231344

> <r_psp_MMGBSA_dG_Bind_vdW>
-43.2663113331937

> <r_psp_Lig_Strain_Energy>
5.24716388706344

> <r_psp_Lig_Strain_Coulomb>
1.30578396238652

> <r_psp_Lig_Strain_Covalent>
1.75698516283735

> <r_psp_Lig_Strain_Hbond>
0

> <r_psp_Lig_Strain_Lipo>
0.0553880446258159

> <r_psp_Lig_Strain_Packing>
0

> <r_psp_Lig_Strain_SelfCont>
0

> <r_psp_Lig_Strain_Solv_GB>
-0.095663385382835

> <r_psp_Lig_Strain_vdW>
2.22467010259657

> <r_psp_Ligand_Energy>
31.1017964407037

> <r_psp_Ligand_Coulomb>
7.55972278476639

> <r_psp_Ligand_Covalent>
23.5967067377682

> <r_psp_Ligand_Hbond>
0

> <r_psp_Ligand_Lipo>
-1.40712961909932

> <r_psp_Ligand_Packing>
0

> <r_psp_Ligand_SelfCont>
0

> <r_psp_Ligand_Solv_GB>
-11.7223180607806

> <r_psp_Ligand_vdW>
13.074814598049

> <r_psp_Complex_Energy>
-34108.2310735851

> <r_psp_Complex_Coulomb>
-26464.2799743075

> <r_psp_Complex_Covalent>
4415.7600168539

> <r_psp_Complex_Hbond>
-550.907033652831

> <r_psp_Complex_Lipo>
-2174.15076641426

> <r_psp_Complex_Packing>
-55.8446424272089

> <r_psp_Complex_SelfCont>
-40.4078915603482

> <r_psp_Complex_Solv_GB>
-5184.89408450024

> <r_psp_Complex_vdW>
-4053.50669757663

> <r_psp_Receptor_Energy>
-34095.2510407338

> <r_psp_Receptor_Coulomb>
-26458.915813943

> <r_psp_Receptor_Covalent>
4390.40652582141

> <r_psp_Receptor_Hbond>
-550.097605083181

> <r_psp_Receptor_Lipo>
-2150.52463233748

> <r_psp_Receptor_Packing>
-55.8446424272089

> <r_psp_Receptor_SelfCont>
-40.4078915603482

> <r_psp_Receptor_Solv_GB>
-5206.55178036259

> <r_psp_Receptor_vdW>
-4023.31520084149

> <r_psp_MMGBSA_dG_Bind(NS)>
-49.3289931790059

> <r_psp_MMGBSA_dG_Bind(NS)_Coulomb>
-14.2296671116528

> <r_psp_MMGBSA_dG_Bind(NS)_Covalent>
-0.000200868112187891

> <r_psp_MMGBSA_dG_Bind(NS)_Hbond>
-0.809428569649413

> <r_psp_MMGBSA_dG_Bind(NS)_Lipo>
-22.2743925023005

> <r_psp_MMGBSA_dG_Bind(NS)_Packing>
0

> <r_psp_MMGBSA_dG_Bind(NS)_SelfCont>
0

> <r_psp_MMGBSA_dG_Bind(NS)_Solv_GB>
33.4756773085192

> <r_psp_MMGBSA_dG_Bind(NS)_vdW>
-45.4909814357952

> <r_psp_Rec_Strain_Energy>
-5.0931703299284e-011

> <r_psp_Rec_Strain_Coulomb>
4.00177668780088e-011

> <r_psp_Rec_Strain_Covalent>
-9.09494701772928e-013

> <r_psp_Rec_Strain_Hbond>
-2.27373675443232e-013

> <r_psp_Rec_Strain_Lipo>
-5.00222085975111e-012

> <r_psp_Rec_Strain_Packing>
4.9737991503207e-014

> <r_psp_Rec_Strain_SelfCont>
7.105427357601e-015

> <r_psp_Rec_Strain_Solv_GB>
-1.81898940354586e-012

> <r_psp_Rec_Strain_vdW>
4.54747350886464e-012

> <r_psp_Prime_MMGBSA_ligand_efficiency>
-1.91660127356464

> <r_psp_Prime_MMGBSA_ligand_efficiency_sa>
-2.87490191034696

> <r_psp_Prime_MMGBSA_ligand_efficiency_ln>
-10.6593860347312

> <r_i_glide_lipo>
-4.54295142850056

> <r_i_glide_hbond>
-0.32

> <r_i_glide_metal>
0

> <r_i_glide_rewards>
-2.05210844259656

> <r_i_glide_erotb>
1.12192785158118

> <r_i_glide_esite>
0

> <i_psp_ExecuteFunction_Internal_Entry_Index>
1439

> <i_qp_#stars>
1

> <i_qp_#amine>
1

> <i_qp_#amidine>
0

> <i_qp_#acid>
0

> <i_qp_#amide>
0

> <i_qp_#rotor>
6

> <i_qp_#rtvFG>
0

> <i_qp_CNS>
0

> <r_qp_mol_MW>
   315.414

> <r_qp_dipole>
     1.854

> <r_qp_SASA>
   631.801

> <r_qp_FOSA>
   360.745

> <r_qp_FISA>
   106.135

> <r_qp_PISA>
   164.920

> <r_qp_WPSA>
     0.000

> <r_qp_volume>
  1088.091

> <r_qp_donorHB>
     3.000

> <r_qp_accptHB>
     4.200

> <r_qp_dip^2/V>
   0.0031594

> <r_qp_ACxDN^.5/SA>
   0.0115141

> <r_qp_glob>
   0.8097699

> <r_qp_QPpolrz>
    35.114

> <r_qp_QPlogPC16>
    10.886

> <r_qp_QPlogPoct>
    17.759

> <r_qp_QPlogPw>
    10.291

> <r_qp_QPlogPo/w>
     2.891

> <r_qp_QPlogS>
    -3.741

> <r_qp_CIQPlogS>
    -3.233

> <r_qp_QPlogHERG>
    -6.123

> <r_qp_QPPCaco>
   243.399

> <r_qp_QPlogBB>
    -0.479

> <r_qp_QPPMDCK>
   118.826

> <r_qp_QPlogKp>
    -4.381

> <r_qp_IP(eV)>
     7.278

> <r_qp_EA(eV)>
     0.114

> <i_qp_#metab>
3

> <r_qp_QPlogKhsa>
     0.343

> <i_qp_HumanOralAbsorption>
3

> <r_qp_PercentHumanOralAbsorption>
    86.584

> <r_qp_SAfluorine>
     0.000

> <r_qp_SAamideO>
     0.000

> <r_qp_PSA>
    81.728

> <i_qp_#NandO>
5

> <i_qp_RuleOfFive>
0

> <i_qp_RuleOfThree>
0

> <i_qp_#ringatoms>
15

> <i_qp_#in34>
0

> <i_qp_#in56>
15

> <i_qp_#noncon>
6

> <i_qp_#nonHatm>
23

> <r_qp_Jm>
0.00238328479849026

> <s_m_subgroupid>
1000_str-imp1->adme_1000-out12

> <s_m_subgroup_title>
1000_str->adme_1000-out1

> <b_m_subgroup_collapsed>
0

$$$$
ind_1,476145
                    3D
 Structure written by MMmdl.
 49 51  0  0  1  0            999 V2000
    3.2794   -4.4953    1.3737 C   0  0  0  0  0  0
    2.8116   -3.4286    0.5982 C   0  0  0  0  0  0
    2.3726   -2.2024    1.1749 C   0  0  0  0  0  0
    2.4200   -2.0581    2.5714 C   0  0  0  0  0  0
    2.8892   -3.1180    3.3453 C   0  0  0  0  0  0
    3.3073   -4.3086    2.7563 C   0  0  0  0  0  0
    1.9459   -1.3622    0.0916 C   0  0  0  0  0  0
    2.2008   -2.0422   -1.1018 C   0  0  0  0  0  0
    2.6664   -3.2948   -0.7660 N   0  0  0  0  0  0
    1.9320   -1.6618   -2.4682 C   0  0  0  0  0  0
    1.7946   -0.3361   -2.6580 N   0  0  0  0  0  0
    1.8581   -2.4996   -3.3697 O   0  0  0  0  0  0
    1.4731    0.3240   -3.9232 C   0  0  0  0  0  0
    0.0261    0.0817   -4.4295 C   0  0  0  0  0  0
   -0.3083    0.8352   -5.7315 C   0  0  0  0  0  0
    0.0321    2.3314   -5.6431 C   0  0  0  0  0  0
    1.5028    2.5450   -5.2501 C   0  0  0  0  0  0
    1.8678    1.8209   -3.9391 C   0  0  0  0  0  0
    3.6083   -5.4239    0.9310 H   0  0  0  0  0  0
    2.0947   -1.1424    3.0428 H   0  0  0  0  0  0
    2.9272   -3.0153    4.4200 H   0  0  0  0  0  0
    3.6635   -5.1093    3.3880 H   0  0  0  0  0  0
    2.8813   -3.9868   -1.4697 H   0  0  0  0  0  0
    1.8128    0.2590   -1.8419 H   0  0  0  0  0  0
    2.1210   -0.1294   -4.6778 H   0  0  0  0  0  0
   -0.1517   -0.9838   -4.5806 H   0  0  0  0  0  0
   -0.6747    0.4122   -3.6610 H   0  0  0  0  0  0
    0.2449    0.3872   -6.5587 H   0  0  0  0  0  0
   -1.3648    0.7088   -5.9713 H   0  0  0  0  0  0
   -0.1718    2.8164   -6.5985 H   0  0  0  0  0  0
   -0.6174    2.8132   -4.9104 H   0  0  0  0  0  0
    2.1476    2.1842   -6.0530 H   0  0  0  0  0  0
    1.7088    3.6117   -5.1535 H   0  0  0  0  0  0
    1.3509    2.3312   -3.1249 H   0  0  0  0  0  0
    2.9372    1.9308   -3.7524 H   0  0  0  0  0  0
   -0.6037   -0.4870    1.5368 C   0  0  0  0  0  0
    0.0076   -0.0277    0.1972 C   0  0  2  0  0  0
    1.4365   -0.0958    0.2212 O   0  0  0  0  0  0
   -0.4007    1.4090   -0.1930 C   0  0  0  0  0  0
    0.1271    2.5101    0.7424 C   0  0  0  0  0  0
   -1.6821   -0.3272    1.5537 H   0  0  0  0  0  0
   -0.1717    0.0521    2.3801 H   0  0  0  0  0  0
   -0.4348   -1.5507    1.7046 H   0  0  0  0  0  0
   -0.3791   -0.6805   -0.5899 H   0  0  0  0  0  0
   -0.0487    1.6113   -1.2051 H   0  0  0  0  0  0
   -1.4882    1.4747   -0.2475 H   0  0  0  0  0  0
   -0.1789    3.4954    0.3898 H   0  0  0  0  0  0
    1.2165    2.5030    0.7910 H   0  0  0  0  0  0
   -0.2552    2.3929    1.7565 H   0  0  0  0  0  0
  1  2  2  0  0  0
  1  6  1  0  0  0
  1 19  1  0  0  0
  2  3  1  0  0  0
  2  9  1  0  0  0
  3  4  2  0  0  0
  3  7  1  0  0  0
  4  5  1  0  0  0
  4 20  1  0  0  0
  5  6  2  0  0  0
  5 21  1  0  0  0
  6 22  1  0  0  0
  7  8  2  0  0  0
  7 38  1  0  0  0
  8  9  1  0  0  0
  8 10  1  0  0  0
  9 23  1  0  0  0
 10 11  1  0  0  0
 10 12  2  0  0  0
 11 13  1  0  0  0
 11 24  1  0  0  0
 13 18  1  0  0  0
 13 14  1  0  0  0
 13 25  1  0  0  0
 14 15  1  0  0  0
 14 26  1  0  0  0
 14 27  1  0  0  0
 15 16  1  0  0  0
 15 28  1  0  0  0
 15 29  1  0  0  0
 16 17  1  0  0  0
 16 30  1  0  0  0
 16 31  1  0  0  0
 17 18  1  0  0  0
 17 32  1  0  0  0
 17 33  1  0  0  0
 18 34  1  0  0  0
 18 35  1  0  0  0
 36 37  1  0  0  0
 36 41  1  0  0  0
 36 42  1  0  0  0
 36 43  1  0  0  0
 37 38  1  0  0  0
 37 39  1  0  0  0
 37 44  1  0  0  0
 39 40  1  0  0  0
 39 45  1  0  0  0
 39 46  1  0  0  0
 40 47  1  0  0  0
 40 48  1  0  0  0
 40 49  1  0  0  0
M  END
> <s_m_entry_id>
7787

> <s_m_entry_name>
entry

> <i_f3d_flags>
0

> <s_m_job_name>
adme_1000

> <r_psp_Prime_Energy>
-34119.3732300292

> <r_psp_Prime_Solv_GB>
-5197.85959649117

> <r_psp_Prime_Coulomb>
-26480.561787575

> <r_psp_Prime_vdW>
-4038.87264906773

> <r_psp_Prime_Covalent>
4424.73600570345

> <i_psp_model_num>
0

> <r_psp_Prime_Lipo>
-2178.46176642051

> <s_psp_Prime_Energy_Force_Field>
S-OPLS

> <s_psp_Prime_Energy_Solvent_Model>
VSGB2.1

> <r_psp_Prime_Hbond>
-550.376399225524

> <r_psp_Prime_Packing>
-57.5691453923892

> <r_psp_Prime_SelfCont>
-40.4078915603482

> <r_psp_Memb1_x>
103.457542316003

> <r_psp_Memb1_y>
39.4731108300965

> <r_psp_Memb1_z>
48.7987221124676

> <r_psp_Memb2_x>
99.8134167309003

> <r_psp_Memb2_y>
2.81176945184187

> <r_psp_Memb2_z>
23.8404289603493

> <r_psp_MembDummyRadius>
4.45

> <r_psp_Prime_Bond_Covalent>
466.756339112695

> <r_psp_Prime_Bond_SGB>
49970.6738719116

> <r_psp_Prime_Angle_Covalent>
2226.16535619989

> <r_psp_Prime_Angle_SGB>
-21655.8237896194

> <r_psp_Prime_Torsion_Covalent>
1731.81431039087

> <r_psp_Prime_NB14_LJ>
4239.60515233863

> <r_psp_Prime_NB14_Lipo>
0

> <r_psp_Prime_NB14_Elec>
25556.0280982159

> <r_psp_Prime_NB14_SGB>
-15622.4111903086

> <r_psp_Prime_NBShort_LJ>
-7863.26839156448

> <r_psp_Prime_NBShort_Lipo>
-2178.46176642051

> <r_psp_Prime_NBShort_Elec>
-53053.4530629226

> <r_psp_Prime_NBShort_SGB>
18018.6438090964

> <r_psp_Prime_NBLong_LJ>
-415.209409841877

> <r_psp_Prime_NBLong_Lipo>
0

> <r_psp_Prime_NBLong_Elec>
1016.86317713173

> <r_psp_Prime_NBLong_SGB>
-1169.7415695799

> <r_psp_Prime_Self_SGB>
-34739.2007279913

> <s_m_Source_Path>
F:\Dekstop_files\DAC4,5\Molecular Systems Desgn and Engineering\supplementary_str

> <s_m_Source_File>
1000_str.mae

> <i_m_Source_File_Index>
711

> <i_lp_mmshare_version>
53156

> <s_epik_input>
W2NIXTFbY0hdW2NIXVtjSF1jKGMxMiljKE9bQ0BASF0oW0NIM10pW0NIMl1bQ0gzXSljKFtuSF0yKUMoPU8pW05IXVtDSF0zW0NIMl1bQ0gyXVtDSDJdW0NIMl1bQ0gyXTM=

> <s_epik_cmdline>
J2VwaWtfcHl0aG9uJywgJy1waHQnLCAnMC4wJywgJy1waCcsICc3LjAnLCAnLXRuJywgJzgnLCAnLW1hJywgJzUwMCcsICctaW1hZScsICc8aW5maWxlLm1hZT4nLCAnLW9tYWUnLCAnPG91dGZpbGUubWFlPic=

> <r_lp_tautomer_probability>
1

> <r_epik_Ionization_Penalty>
  0.0000

> <r_epik_Ionization_Penalty_Charging>
  0.0000

> <r_epik_Ionization_Penalty_Neutral>
  0.0000

> <r_epik_State_Penalty>
  0.0000

> <r_epik_Charging_Adjusted_Penalty>
0

> <i_epik_Tot_Q>
0

> <i_epik_Tot_abs_Q>
0

> <s_lp_Force_Field>
S-OPLS

> <r_lp_Energy>
31.070656

> <b_lp_Chiralities_Consistent>
1

> <s_lp_Variant>
ind_1,476145-1

> <s_i_glide_gridfile>
glide-grid_mmpl3

> <i_i_glide_lignum>
2432

> <i_i_glide_rotatable_bonds>
6

> <r_i_docking_score>
-6.87619376209621

> <r_i_glide_ligand_efficiency>
-0.298964946178096

> <r_i_glide_ligand_efficiency_sa>
-0.850216537680372

> <r_i_glide_ligand_efficiency_ln>
-1.6627260015527

> <r_i_glide_gscore>
-6.87619376209621

> <r_i_glide_evdw>
-27.3298072814941

> <r_i_glide_ecoul>
-2.65722966194153

> <r_i_glide_energy>
-29.9870369434357

> <r_i_glide_einternal>
7.17102289199829

> <r_i_glide_emodel>
-26.8666036367625

> <i_i_glide_confnum>
216

> <i_i_glide_posenum>
341

> <r_i_glide_eff_state_penalty>
0

> <i_rge_num_r_groups>
1

> <r_rge_occupation_R1>
1

> <s_rge_R1>
476145

> <s_rge_R1_s_m_title>
476145

> <s_rge_R1_s_m_entry_id>
18005

> <s_rge_R1_s_m_entry_name>
eMol_BB_r-groups.1014

> <s_rge_R1_s_m_smiles>
[*]O[C@@H](C)CC

> <b_rge_R1_b_sd_chiral_flag>
0

> <i_rge_R1_i_sd_version>
0

> <s_rge_R1_s_m_Source_File>
eMol_BB_r-groups-dedup.mae

> <i_rge_R1_i_m_Source_File_Index>
839

> <s_rge_R1_s_m_Source_Path>
/Users/konze/projects/pathfinder/r-groups

> <s_rge_R1_s_sd_Source_Path>
/Users/konze/projects/pathfinder/reactant sets/eMolecules

> <s_rge_R1_s_sd_Source_File>
eMol BB r-groups.mae

> <i_rge_R1_i_sd_Source_File_Index>
1014

> <r_rge_R1_r_sd_MW>
74.1216

> <i_rge_R1_i_sd_RB>
1

> <i_rge_R1_i_sd_HeavyAtomCount>
5

> <i_rge_R1_i_sd_HBA>
1

> <i_rge_R1_i_sd_HBD>
1

> <r_rge_R1_r_sd_PSA>
20.23

> <i_rge_R1_i_sd_ChiralCenterCount>
0

> <i_rge_R1_i_sd_ChiralCenterCountAllPossible>
1

> <i_rge_R1_i_sd_RingCount>
0

> <r_rge_R1_r_sd_AlogP>
0.892

> <s_rge_R1_s_sd_subgroup_title>
eMol BB r-groups

> <s_rge_R1_s_sd_subgroupid>
eMol BB r-groups

> <i_rge_R1_i_sd_subgroup_collapsed>
0

> <s_rge_R1_s_sd_Unique_SMILES_Stereo>
C[C@H](O)CC

> <i_rge_R1_i_sd_canvasUID>
955

> <s_rge_R1_s_canvas_Unique_SMILES_Stereo>
C[C@H](O)CC

> <s_psp_Prime_MMGBSA_Input_Structure_Hash>
4cff8e504637289b8057b45a58d7829d923a0e52596129a7110f6963

> <i_psp_number_heavy_atoms>
23

> <r_psp_MMGBSA_dG_Bind>
-26.5453968174479

> <r_psp_MMGBSA_dG_Bind_Coulomb>
1.83540657856429

> <r_psp_MMGBSA_dG_Bind_Covalent>
11.6193165091017

> <r_psp_MMGBSA_dG_Bind_Hbond>
-0.278794142342576

> <r_psp_MMGBSA_dG_Bind_Lipo>
-25.1648802551767

> <r_psp_MMGBSA_dG_Bind_Packing>
-1.72450296518031

> <r_psp_MMGBSA_dG_Bind_SelfCont>
7.105427357601e-015

> <r_psp_MMGBSA_dG_Bind_Solv_GB>
13.9979770617674

> <r_psp_MMGBSA_dG_Bind_vdW>
-26.8299196040953

> <r_psp_Lig_Strain_Energy>
17.9881530970256

> <r_psp_Lig_Strain_Coulomb>
2.13341593634705

> <r_psp_Lig_Strain_Covalent>
11.6195173772134

> <r_psp_Lig_Strain_Hbond>
0

> <r_psp_Lig_Strain_Lipo>
0.535936356585997

> <r_psp_Lig_Strain_Packing>
0

> <r_psp_Lig_Strain_SelfCont>
0

> <r_psp_Lig_Strain_Solv_GB>
0.283898176768005

> <r_psp_Lig_Strain_vdW>
3.41538525011111

> <r_psp_Ligand_Energy>
2.42320752199886

> <r_psp_Ligand_Coulomb>
-23.4813802105934

> <r_psp_Ligand_Covalent>
22.7101633729383

> <r_psp_Ligand_Hbond>
0

> <r_psp_Ligand_Lipo>
-2.77225382785523

> <r_psp_Ligand_Packing>
0

> <r_psp_Ligand_SelfCont>
0

> <r_psp_Ligand_Solv_GB>
-5.30579319035041

> <r_psp_Ligand_vdW>
11.2724713778597

> <r_psp_Complex_Energy>
-34119.3732300292

> <r_psp_Complex_Coulomb>
-26480.561787575

> <r_psp_Complex_Covalent>
4424.73600570345

> <r_psp_Complex_Hbond>
-550.376399225524

> <r_psp_Complex_Lipo>
-2178.46176642051

> <r_psp_Complex_Packing>
-57.5691453923892

> <r_psp_Complex_SelfCont>
-40.4078915603482

> <r_psp_Complex_Solv_GB>
-5197.85959649117

> <r_psp_Complex_vdW>
-4038.87264906773

> <r_psp_Receptor_Energy>
-34095.2510407338

> <r_psp_Receptor_Coulomb>
-26458.915813943

> <r_psp_Receptor_Covalent>
4390.40652582141

> <r_psp_Receptor_Hbond>
-550.097605083181

> <r_psp_Receptor_Lipo>
-2150.52463233748

> <r_psp_Receptor_Packing>
-55.8446424272089

> <r_psp_Receptor_SelfCont>
-40.4078915603482

> <r_psp_Receptor_Solv_GB>
-5206.55178036259

> <r_psp_Receptor_vdW>
-4023.31520084149

> <r_psp_MMGBSA_dG_Bind(NS)>
-44.5335499144203

> <r_psp_MMGBSA_dG_Bind(NS)_Coulomb>
-0.298009357822593

> <r_psp_MMGBSA_dG_Bind(NS)_Covalent>
-0.000200868111278396

> <r_psp_MMGBSA_dG_Bind(NS)_Hbond>
-0.278794142342349

> <r_psp_MMGBSA_dG_Bind(NS)_Lipo>
-25.700816611758

> <r_psp_MMGBSA_dG_Bind(NS)_Packing>
-1.72450296518036

> <r_psp_MMGBSA_dG_Bind(NS)_SelfCont>
0

> <r_psp_MMGBSA_dG_Bind(NS)_Solv_GB>
13.7140788850011

> <r_psp_MMGBSA_dG_Bind(NS)_vdW>
-30.2453048542106

> <r_psp_Rec_Strain_Energy>
-5.0931703299284e-011

> <r_psp_Rec_Strain_Coulomb>
4.00177668780088e-011

> <r_psp_Rec_Strain_Covalent>
-9.09494701772928e-013

> <r_psp_Rec_Strain_Hbond>
-2.27373675443232e-013

> <r_psp_Rec_Strain_Lipo>
-5.00222085975111e-012

> <r_psp_Rec_Strain_Packing>
4.9737991503207e-014

> <r_psp_Rec_Strain_SelfCont>
7.105427357601e-015

> <r_psp_Rec_Strain_Solv_GB>
-1.81898940354586e-012

> <r_psp_Rec_Strain_vdW>
4.54747350886464e-012

> <r_psp_Prime_MMGBSA_ligand_efficiency>
-1.15414768771513

> <r_psp_Prime_MMGBSA_ligand_efficiency_sa>
-1.73122153157269

> <r_psp_Prime_MMGBSA_ligand_efficiency_ln>
-6.41891765080943

> <r_i_glide_lipo>
-3.89682370452214

> <r_i_glide_hbond>
-0.141103072768844

> <r_i_glide_metal>
0

> <r_i_glide_rewards>
-1.9133061414009

> <r_i_glide_erotb>
0.940113969961616

> <r_i_glide_esite>
-0.1

> <i_psp_ExecuteFunction_Internal_Entry_Index>
2406

> <s_rge_R1_s_st_Chirality_1>
2_S_3_4_1_9

> <i_qp_#stars>
0

> <i_qp_#amine>
0

> <i_qp_#amidine>
0

> <i_qp_#acid>
0

> <i_qp_#amide>
0

> <i_qp_#rotor>
5

> <i_qp_#rtvFG>
0

> <i_qp_CNS>
0

> <r_qp_mol_MW>
   314.427

> <r_qp_dipole>
     2.634

> <r_qp_SASA>
   599.082

> <r_qp_FOSA>
   370.295

> <r_qp_FISA>
    60.475

> <r_qp_PISA>
   168.312

> <r_qp_WPSA>
     0.000

> <r_qp_volume>
  1076.260

> <r_qp_donorHB>
     2.000

> <r_qp_accptHB>
     3.250

> <r_qp_dip^2/V>
   0.0064455

> <r_qp_ACxDN^.5/SA>
   0.0076721

> <r_qp_glob>
   0.8477935

> <r_qp_QPpolrz>
    35.315

> <r_qp_QPlogPC16>
    10.293

> <r_qp_QPlogPoct>
    15.857

> <r_qp_QPlogPw>
     7.745

> <r_qp_QPlogPo/w>
     4.253

> <r_qp_QPlogS>
    -5.018

> <r_qp_CIQPlogS>
    -4.700

> <r_qp_QPlogHERG>
    -4.798

> <r_qp_QPPCaco>
  2644.938

> <r_qp_QPlogBB>
    -0.299

> <r_qp_QPPMDCK>
  1415.570

> <r_qp_QPlogKp>
    -1.561

> <r_qp_IP(eV)>
     8.396

> <r_qp_EA(eV)>
     0.507

> <i_qp_#metab>
1

> <r_qp_QPlogKhsa>
     0.624

> <i_qp_HumanOralAbsorption>
3

> <r_qp_PercentHumanOralAbsorption>
   100.000

> <r_qp_SAfluorine>
     0.000

> <r_qp_SAamideO>
     0.000

> <r_qp_PSA>
    55.020

> <i_qp_#NandO>
4

> <i_qp_RuleOfFive>
0

> <i_qp_RuleOfThree>
0

> <i_qp_#ringatoms>
15

> <i_qp_#in34>
0

> <i_qp_#in56>
15

> <i_qp_#noncon>
6

> <i_qp_#nonHatm>
23

> <r_qp_Jm>
0.0829120738414938

> <s_m_subgroupid>
1000_str-imp1->adme_1000-out12

> <s_m_subgroup_title>
1000_str->adme_1000-out1

> <b_m_subgroup_collapsed>
0

$$$$
ind_1,476145
                    3D
 Structure written by MMmdl.
 49 51  0  0  1  0            999 V2000
    3.2848   -4.4929   -1.3738 C   0  0  0  0  0  0
    2.8138   -3.4270   -0.5991 C   0  0  0  0  0  0
    2.3751   -2.2008   -1.1762 C   0  0  0  0  0  0
    2.4256   -2.0562   -2.5724 C   0  0  0  0  0  0
    2.8988   -3.1149   -3.3455 C   0  0  0  0  0  0
    3.3166   -4.3054   -2.7561 C   0  0  0  0  0  0
    1.9450   -1.3615   -0.0935 C   0  0  0  0  0  0
    2.1994   -2.0416    1.0999 C   0  0  0  0  0  0
    2.6651   -3.2941    0.7647 N   0  0  0  0  0  0
    1.9302   -1.6609    2.4658 C   0  0  0  0  0  0
    1.7928   -0.3352    2.6552 N   0  0  0  0  0  0
    1.8557   -2.4983    3.3674 O   0  0  0  0  0  0
    1.4699    0.3241    3.9201 C   0  0  0  0  0  0
    1.8712    1.8190    3.9406 C   0  0  0  0  0  0
    1.5140    2.5352    5.2575 C   0  0  0  0  0  0
    0.0410    2.3324    5.6475 C   0  0  0  0  0  0
   -0.3160    0.8390    5.7231 C   0  0  0  0  0  0
    0.0192    0.0887    4.4191 C   0  0  0  0  0  0
    3.6140   -5.4212   -0.9309 H   0  0  0  0  0  0
    2.1002   -1.1407   -3.0441 H   0  0  0  0  0  0
    2.9401   -3.0117   -4.4202 H   0  0  0  0  0  0
    3.6759   -5.1052   -3.3870 H   0  0  0  0  0  0
    2.8786   -3.9864    1.4686 H   0  0  0  0  0  0
    1.8110    0.2599    1.8390 H   0  0  0  0  0  0
    2.1131   -0.1340    4.6760 H   0  0  0  0  0  0
    2.9402    1.9255    3.7503 H   0  0  0  0  0  0
    1.3545    2.3357    3.1303 H   0  0  0  0  0  0
    2.1547    2.1602    6.0570 H   0  0  0  0  0  0
    1.7318    3.6004    5.1704 H   0  0  0  0  0  0
   -0.1585    2.8104    6.6073 H   0  0  0  0  0  0
   -0.6030    2.8273    4.9187 H   0  0  0  0  0  0
    0.2255    0.3797    6.5518 H   0  0  0  0  0  0
   -1.3756    0.7224    5.9540 H   0  0  0  0  0  0
   -0.6759    0.4256    3.6482 H   0  0  0  0  0  0
   -0.1656   -0.9765    4.5647 H   0  0  0  0  0  0
   -0.6144   -0.4959   -1.5210 C   0  0  0  0  0  0
    0.0060   -0.0264   -0.1893 C   0  0  1  0  0  0
    1.4346   -0.0953   -0.2236 O   0  0  0  0  0  0
   -0.4007    1.4129    0.1930 C   0  0  0  0  0  0
    0.1210    2.5084   -0.7525 C   0  0  0  0  0  0
   -1.6927   -0.3358   -1.5323 H   0  0  0  0  0  0
   -0.4470   -1.5610   -1.6810 H   0  0  0  0  0  0
   -0.1872    0.0359   -2.3714 H   0  0  0  0  0  0
   -0.3757   -0.6733    0.6048 H   0  0  0  0  0  0
   -1.4880    1.4779    0.2517 H   0  0  0  0  0  0
   -0.0443    1.6230    1.2021 H   0  0  0  0  0  0
   -0.1894    3.4953   -0.4084 H   0  0  0  0  0  0
   -0.2621    2.3807   -1.7649 H   0  0  0  0  0  0
    1.2103    2.5065   -0.8030 H   0  0  0  0  0  0
  1  2  2  0  0  0
  1  6  1  0  0  0
  1 19  1  0  0  0
  2  3  1  0  0  0
  2  9  1  0  0  0
  3  4  2  0  0  0
  3  7  1  0  0  0
  4  5  1  0  0  0
  4 20  1  0  0  0
  5  6  2  0  0  0
  5 21  1  0  0  0
  6 22  1  0  0  0
  7  8  2  0  0  0
  7 38  1  0  0  0
  8  9  1  0  0  0
  8 10  1  0  0  0
  9 23  1  0  0  0
 10 11  1  0  0  0
 10 12  2  0  0  0
 11 13  1  0  0  0
 11 24  1  0  0  0
 13 18  1  0  0  0
 13 14  1  0  0  0
 13 25  1  0  0  0
 14 15  1  0  0  0
 14 26  1  0  0  0
 14 27  1  0  0  0
 15 16  1  0  0  0
 15 28  1  0  0  0
 15 29  1  0  0  0
 16 17  1  0  0  0
 16 30  1  0  0  0
 16 31  1  0  0  0
 17 18  1  0  0  0
 17 32  1  0  0  0
 17 33  1  0  0  0
 18 34  1  0  0  0
 18 35  1  0  0  0
 36 37  1  0  0  0
 36 41  1  0  0  0
 36 42  1  0  0  0
 36 43  1  0  0  0
 37 38  1  0  0  0
 37 39  1  0  0  0
 37 44  1  0  0  0
 39 40  1  0  0  0
 39 45  1  0  0  0
 39 46  1  0  0  0
 40 47  1  0  0  0
 40 48  1  0  0  0
 40 49  1  0  0  0
M  END
> <s_m_entry_id>
7790

> <s_m_entry_name>
entry

> <i_f3d_flags>
0

> <s_m_job_name>
adme_1000

> <r_psp_Prime_Energy>
-34119.9097511518

> <r_psp_Prime_Solv_GB>
-5197.5801246897

> <r_psp_Prime_Coulomb>
-26474.4515410052

> <r_psp_Prime_vdW>
-4048.76005066579

> <r_psp_Prime_Covalent>
4426.7847382943

> <i_psp_model_num>
0

> <r_psp_Prime_Lipo>
-2178.2363568689

> <s_psp_Prime_Energy_Force_Field>
S-OPLS

> <s_psp_Prime_Energy_Solvent_Model>
VSGB2.1

> <r_psp_Prime_Hbond>
-550.098650541002

> <r_psp_Prime_Packing>
-57.1598741150635

> <r_psp_Prime_SelfCont>
-40.4078915603482

> <r_psp_Memb1_x>
103.457542316003

> <r_psp_Memb1_y>
39.4731108300965

> <r_psp_Memb1_z>
48.7987221124676

> <r_psp_Memb2_x>
99.8134167309003

> <r_psp_Memb2_y>
2.81176945184187

> <r_psp_Memb2_z>
23.8404289603493

> <r_psp_MembDummyRadius>
4.45

> <r_psp_Prime_Bond_Covalent>
467.381707203583

> <r_psp_Prime_Bond_SGB>
49971.3326189182

> <r_psp_Prime_Angle_Covalent>
2225.44519685146

> <r_psp_Prime_Angle_SGB>
-21654.8372849626

> <r_psp_Prime_Torsion_Covalent>
1733.95783423926

> <r_psp_Prime_NB14_LJ>
4238.43681821577

> <r_psp_Prime_NB14_Lipo>
0

> <r_psp_Prime_NB14_Elec>
25555.8066760924

> <r_psp_Prime_NB14_SGB>
-15625.1779231993

> <r_psp_Prime_NBShort_LJ>
-7872.26766582081

> <r_psp_Prime_NBShort_Lipo>
-2178.2363568689

> <r_psp_Prime_NBShort_Elec>
-53047.7294107704

> <r_psp_Prime_NBShort_SGB>
18020.6969658027

> <r_psp_Prime_NBLong_LJ>
-414.929203060742

> <r_psp_Prime_NBLong_Lipo>
0

> <r_psp_Prime_NBLong_Elec>
1017.47119367274

> <r_psp_Prime_NBLong_SGB>
-1169.7345859062

> <r_psp_Prime_Self_SGB>
-34739.8599153425

> <s_m_Source_Path>
F:\Dekstop_files\DAC4,5\Molecular Systems Desgn and Engineering\supplementary_str

> <s_m_Source_File>
1000_str.mae

> <i_m_Source_File_Index>
714

> <i_lp_mmshare_version>
53156

> <s_epik_input>
W2NIXTFbY0hdW2NIXVtjSF1jKGMxMiljKE9bQ0BIXShbQ0gzXSlbQ0gyXVtDSDNdKWMoW25IXTIpQyg9TylbTkhdW0NIXTNbQ0gyXVtDSDJdW0NIMl1bQ0gyXVtDSDJdMw==

> <s_epik_cmdline>
J2VwaWtfcHl0aG9uJywgJy1waHQnLCAnMC4wJywgJy1waCcsICc3LjAnLCAnLXRuJywgJzgnLCAnLW1hJywgJzUwMCcsICctaW1hZScsICc8aW5maWxlLm1hZT4nLCAnLW9tYWUnLCAnPG91dGZpbGUubWFlPic=

> <r_lp_tautomer_probability>
1

> <r_epik_Ionization_Penalty>
  0.0000

> <r_epik_Ionization_Penalty_Charging>
  0.0000

> <r_epik_Ionization_Penalty_Neutral>
  0.0000

> <r_epik_State_Penalty>
  0.0000

> <r_epik_Charging_Adjusted_Penalty>
0

> <i_epik_Tot_Q>
0

> <i_epik_Tot_abs_Q>
0

> <s_lp_Force_Field>
S-OPLS

> <r_lp_Energy>
31.038587

> <b_lp_Chiralities_Consistent>
1

> <s_lp_Variant>
ind_1,476145-1

> <s_i_glide_gridfile>
glide-grid_mmpl3

> <i_i_glide_lignum>
2431

> <i_i_glide_rotatable_bonds>
6

> <r_i_docking_score>
-7.12350147447804

> <r_i_glide_ligand_efficiency>
-0.309717455412089

> <r_i_glide_ligand_efficiency_sa>
-0.880795243609512

> <r_i_glide_ligand_efficiency_ln>
-1.72252724886898

> <r_i_glide_gscore>
-7.12350147447804

> <r_i_glide_evdw>
-37.9854965209961

> <r_i_glide_ecoul>
0.940363347530365

> <r_i_glide_energy>
-37.0451331734657

> <r_i_glide_einternal>
12.9456787109375

> <r_i_glide_emodel>
-44.4296268257681

> <i_i_glide_confnum>
44

> <i_i_glide_posenum>
182

> <r_i_glide_eff_state_penalty>
0

> <i_rge_num_r_groups>
1

> <r_rge_occupation_R1>
1

> <s_rge_R1>
476145

> <s_rge_R1_s_m_title>
476145

> <s_rge_R1_s_m_entry_id>
18005

> <s_rge_R1_s_m_entry_name>
eMol_BB_r-groups.1014

> <s_rge_R1_s_m_smiles>
[*]O[C@@H](C)CC

> <b_rge_R1_b_sd_chiral_flag>
0

> <i_rge_R1_i_sd_version>
0

> <s_rge_R1_s_m_Source_File>
eMol_BB_r-groups-dedup.mae

> <i_rge_R1_i_m_Source_File_Index>
839

> <s_rge_R1_s_m_Source_Path>
/Users/konze/projects/pathfinder/r-groups

> <s_rge_R1_s_sd_Source_Path>
/Users/konze/projects/pathfinder/reactant sets/eMolecules

> <s_rge_R1_s_sd_Source_File>
eMol BB r-groups.mae

> <i_rge_R1_i_sd_Source_File_Index>
1014

> <r_rge_R1_r_sd_MW>
74.1216

> <i_rge_R1_i_sd_RB>
1

> <i_rge_R1_i_sd_HeavyAtomCount>
5

> <i_rge_R1_i_sd_HBA>
1

> <i_rge_R1_i_sd_HBD>
1

> <r_rge_R1_r_sd_PSA>
20.23

> <i_rge_R1_i_sd_ChiralCenterCount>
0

> <i_rge_R1_i_sd_ChiralCenterCountAllPossible>
1

> <i_rge_R1_i_sd_RingCount>
0

> <r_rge_R1_r_sd_AlogP>
0.892

> <s_rge_R1_s_sd_subgroup_title>
eMol BB r-groups

> <s_rge_R1_s_sd_subgroupid>
eMol BB r-groups

> <i_rge_R1_i_sd_subgroup_collapsed>
0

> <s_rge_R1_s_sd_Unique_SMILES_Stereo>
C[C@H](O)CC

> <i_rge_R1_i_sd_canvasUID>
955

> <s_rge_R1_s_canvas_Unique_SMILES_Stereo>
C[C@H](O)CC

> <s_psp_Prime_MMGBSA_Input_Structure_Hash>
ab6cf452101aa5290df7b811f5c0cc81c3ba76263b03aa688cf2b383

> <i_psp_number_heavy_atoms>
23

> <r_psp_MMGBSA_dG_Bind>
-27.0305256549764

> <r_psp_MMGBSA_dG_Bind_Coulomb>
8.03935022174483

> <r_psp_MMGBSA_dG_Bind_Covalent>
13.4528284305052

> <r_psp_MMGBSA_dG_Bind_Hbond>
-0.00104545782096466

> <r_psp_MMGBSA_dG_Bind_Lipo>
-24.9347357820398

> <r_psp_MMGBSA_dG_Bind_Packing>
-1.3152316878546

> <r_psp_MMGBSA_dG_Bind_SelfCont>
7.105427357601e-015

> <r_psp_MMGBSA_dG_Bind_Solv_GB>
14.2917824517999

> <r_psp_MMGBSA_dG_Bind_vdW>
-36.5634738312028

> <r_psp_Lig_Strain_Energy>
21.4320551726937

> <r_psp_Lig_Strain_Coulomb>
4.04610486825358

> <r_psp_Lig_Strain_Covalent>
13.4530292986188

> <r_psp_Lig_Strain_Hbond>
0

> <r_psp_Lig_Strain_Lipo>
0.462874450104642

> <r_psp_Lig_Strain_Packing>
0

> <r_psp_Lig_Strain_SelfCont>
0

> <r_psp_Lig_Strain_Solv_GB>
-0.769743137572391

> <r_psp_Lig_Strain_vdW>
4.23978969328907

> <r_psp_Ligand_Energy>
2.37181523701375

> <r_psp_Ligand_Coulomb>
-23.5750772839896

> <r_psp_Ligand_Covalent>
22.9253840423855

> <r_psp_Ligand_Hbond>
0

> <r_psp_Ligand_Lipo>
-2.77698874938254

> <r_psp_Ligand_Packing>
0

> <r_psp_Ligand_SelfCont>
0

> <r_psp_Ligand_Solv_GB>
-5.32012677890502

> <r_psp_Ligand_vdW>
11.1186240069054

> <r_psp_Complex_Energy>
-34119.9097511518

> <r_psp_Complex_Coulomb>
-26474.4515410052

> <r_psp_Complex_Covalent>
4426.7847382943

> <r_psp_Complex_Hbond>
-550.098650541002

> <r_psp_Complex_Lipo>
-2178.2363568689

> <r_psp_Complex_Packing>
-57.1598741150635

> <r_psp_Complex_SelfCont>
-40.4078915603482

> <r_psp_Complex_Solv_GB>
-5197.5801246897

> <r_psp_Complex_vdW>
-4048.76005066579

> <r_psp_Receptor_Energy>
-34095.2510407338

> <r_psp_Receptor_Coulomb>
-26458.915813943

> <r_psp_Receptor_Covalent>
4390.40652582141

> <r_psp_Receptor_Hbond>
-550.097605083181

> <r_psp_Receptor_Lipo>
-2150.52463233748

> <r_psp_Receptor_Packing>
-55.8446424272089

> <r_psp_Receptor_SelfCont>
-40.4078915603482

> <r_psp_Receptor_Solv_GB>
-5206.55178036259

> <r_psp_Receptor_vdW>
-4023.31520084149

> <r_psp_MMGBSA_dG_Bind(NS)>
-48.4625808276178

> <r_psp_MMGBSA_dG_Bind(NS)_Coulomb>
3.99324535345295

> <r_psp_MMGBSA_dG_Bind(NS)_Covalent>
-0.000200868113097386

> <r_psp_MMGBSA_dG_Bind(NS)_Hbond>
-0.00104545782073728

> <r_psp_MMGBSA_dG_Bind(NS)_Lipo>
-25.397610232139

> <r_psp_MMGBSA_dG_Bind(NS)_Packing>
-1.31523168785465

> <r_psp_MMGBSA_dG_Bind(NS)_SelfCont>
0

> <r_psp_MMGBSA_dG_Bind(NS)_Solv_GB>
15.0615255893736

> <r_psp_MMGBSA_dG_Bind(NS)_vdW>
-40.8032635244963

> <r_psp_Rec_Strain_Energy>
-5.0931703299284e-011

> <r_psp_Rec_Strain_Coulomb>
4.00177668780088e-011

> <r_psp_Rec_Strain_Covalent>
-9.09494701772928e-013

> <r_psp_Rec_Strain_Hbond>
-2.27373675443232e-013

> <r_psp_Rec_Strain_Lipo>
-5.00222085975111e-012

> <r_psp_Rec_Strain_Packing>
4.9737991503207e-014

> <r_psp_Rec_Strain_SelfCont>
7.105427357601e-015

> <r_psp_Rec_Strain_Solv_GB>
-1.81898940354586e-012

> <r_psp_Rec_Strain_vdW>
4.54747350886464e-012

> <r_psp_Prime_MMGBSA_ligand_efficiency>
-1.17524024586854

> <r_psp_Prime_MMGBSA_ligand_efficiency_sa>
-1.76286036880281

> <r_psp_Prime_MMGBSA_ligand_efficiency_ln>
-6.5362262026289

> <r_i_glide_lipo>
-4.18381292438441

> <r_i_glide_hbond>
0

> <r_i_glide_metal>
0

> <r_i_glide_rewards>
-2.06805207075564

> <r_i_glide_erotb>
0.940113969961616

> <r_i_glide_esite>
-0.0535301253793543

> <i_psp_ExecuteFunction_Internal_Entry_Index>
2381

> <s_rge_R1_s_st_Chirality_1>
2_S_3_4_1_9

> <i_qp_#stars>
0

> <i_qp_#amine>
0

> <i_qp_#amidine>
0

> <i_qp_#acid>
0

> <i_qp_#amide>
0

> <i_qp_#rotor>
5

> <i_qp_#rtvFG>
0

> <i_qp_CNS>
0

> <r_qp_mol_MW>
   314.427

> <r_qp_dipole>
     2.627

> <r_qp_SASA>
   600.233

> <r_qp_FOSA>
   371.324

> <r_qp_FISA>
    60.495

> <r_qp_PISA>
   168.414

> <r_qp_WPSA>
     0.000

> <r_qp_volume>
  1077.180

> <r_qp_donorHB>
     2.000

> <r_qp_accptHB>
     3.250

> <r_qp_dip^2/V>
   0.0064060

> <r_qp_ACxDN^.5/SA>
   0.0076574

> <r_qp_glob>
   0.8466508

> <r_qp_QPpolrz>
    35.353

> <r_qp_QPlogPC16>
    10.300

> <r_qp_QPlogPoct>
    15.866

> <r_qp_QPlogPw>
     7.748

> <r_qp_QPlogPo/w>
     4.258

> <r_qp_QPlogS>
    -5.038

> <r_qp_CIQPlogS>
    -4.700

> <r_qp_QPlogHERG>
    -4.817

> <r_qp_QPPCaco>
  2643.763

> <r_qp_QPlogBB>
    -0.300

> <r_qp_QPPMDCK>
  1414.890

> <r_qp_QPlogKp>
    -1.561

> <r_qp_IP(eV)>
     8.396

> <r_qp_EA(eV)>
     0.506

> <i_qp_#metab>
1

> <r_qp_QPlogKhsa>
     0.626

> <i_qp_HumanOralAbsorption>
3

> <r_qp_PercentHumanOralAbsorption>
   100.000

> <r_qp_SAfluorine>
     0.000

> <r_qp_SAamideO>
     0.000

> <r_qp_PSA>
    54.964

> <i_qp_#NandO>
4

> <i_qp_RuleOfFive>
0

> <i_qp_RuleOfThree>
0

> <i_qp_#ringatoms>
15

> <i_qp_#in34>
0

> <i_qp_#in56>
15

> <i_qp_#noncon>
6

> <i_qp_#nonHatm>
23

> <r_qp_Jm>
0.079117763532976

> <s_m_subgroupid>
1000_str-imp1->adme_1000-out12

> <s_m_subgroup_title>
1000_str->adme_1000-out1

> <b_m_subgroup_collapsed>
0

$$$$
ind_1,476462
                    3D
 Structure written by MMmdl.
 46 49  0  0  1  0            999 V2000
   -3.3683    1.7480    0.2921 C   0  0  0  0  0  0
   -2.3019    0.8476    0.1921 C   0  0  0  0  0  0
   -0.9419    1.2690    0.1746 C   0  0  0  0  0  0
   -0.6674    2.6445    0.2732 C   0  0  0  0  0  0
   -1.7266    3.5443    0.3751 C   0  0  0  0  0  0
   -3.0467    3.1022    0.3827 C   0  0  0  0  0  0
   -0.1268    0.0869    0.0545 C   0  0  0  0  0  0
   -0.9957   -1.0116    0.0341 C   0  0  0  0  0  0
   -2.2853   -0.5239    0.0933 N   0  0  0  0  0  0
   -0.6887   -2.4178   -0.1360 C   0  0  0  0  0  0
   -1.6480   -3.2633    0.2925 N   0  0  0  0  0  0
    0.3812   -2.7893   -0.6210 O   0  0  0  0  0  0
   -1.5896   -4.7254    0.2360 C   0  0  0  0  0  0
   -2.5771   -5.4071    1.2138 C   0  0  0  0  0  0
   -2.5410   -6.9469    1.1567 C   0  0  0  0  0  0
   -2.6913   -7.4793   -0.2774 C   0  0  0  0  0  0
   -1.6301   -6.8733   -1.2101 C   0  0  0  0  0  0
   -1.6439   -5.3318   -1.1920 C   0  0  0  0  0  0
   -4.3969    1.4185    0.3024 H   0  0  0  0  0  0
    0.3503    3.0057    0.2736 H   0  0  0  0  0  0
   -1.5206    4.6020    0.4512 H   0  0  0  0  0  0
   -3.8429    3.8277    0.4635 H   0  0  0  0  0  0
   -3.0877   -1.1357    0.0627 H   0  0  0  0  0  0
   -2.5185   -2.8713    0.6192 H   0  0  0  0  0  0
   -0.6039   -5.0005    0.6205 H   0  0  0  0  0  0
   -2.3806   -5.0810    2.2365 H   0  0  0  0  0  0
   -3.5919   -5.0878    0.9703 H   0  0  0  0  0  0
   -1.5982   -7.3011    1.5763 H   0  0  0  0  0  0
   -3.3274   -7.3596    1.7899 H   0  0  0  0  0  0
   -2.6110   -8.5670   -0.2798 H   0  0  0  0  0  0
   -3.6885   -7.2456   -0.6537 H   0  0  0  0  0  0
   -0.6425   -7.2276   -0.9105 H   0  0  0  0  0  0
   -1.7831   -7.2322   -2.2286 H   0  0  0  0  0  0
   -2.5608   -4.9983   -1.6808 H   0  0  0  0  0  0
   -0.8134   -4.9641   -1.7958 H   0  0  0  0  0  0
    1.6151    1.4836   -2.1213 C   0  0  0  0  0  0
    2.0821    0.7217   -0.9734 N   0  0  0  0  0  0
    3.3855    0.4191   -0.6743 C   0  0  0  0  0  0
    3.3316   -0.3738    0.4586 C   0  0  0  0  0  0
    2.0883   -0.5792    0.8519 N   0  0  0  0  0  0
    1.3362    0.0720   -0.0093 C   0  0  0  0  0  0
    2.3307    1.3980   -2.9397 H   0  0  0  0  0  0
    1.5253    2.5325   -1.8394 H   0  0  0  0  0  0
    0.6426    1.1141   -2.4481 H   0  0  0  0  0  0
    4.2044    0.7802   -1.2793 H   0  0  0  0  0  0
    4.1739   -0.8015    0.9822 H   0  0  0  0  0  0
  1  2  2  0  0  0
  1  6  1  0  0  0
  1 19  1  0  0  0
  2  3  1  0  0  0
  2  9  1  0  0  0
  3  4  2  0  0  0
  3  7  1  0  0  0
  4  5  1  0  0  0
  4 20  1  0  0  0
  5  6  2  0  0  0
  5 21  1  0  0  0
  6 22  1  0  0  0
  7  8  2  0  0  0
  7 41  1  0  0  0
  8  9  1  0  0  0
  8 10  1  0  0  0
  9 23  1  0  0  0
 10 11  1  0  0  0
 10 12  2  0  0  0
 11 13  1  0  0  0
 11 24  1  0  0  0
 13 18  1  0  0  0
 13 14  1  0  0  0
 13 25  1  0  0  0
 14 15  1  0  0  0
 14 26  1  0  0  0
 14 27  1  0  0  0
 15 16  1  0  0  0
 15 28  1  0  0  0
 15 29  1  0  0  0
 16 17  1  0  0  0
 16 30  1  0  0  0
 16 31  1  0  0  0
 17 18  1  0  0  0
 17 32  1  0  0  0
 17 33  1  0  0  0
 18 34  1  0  0  0
 18 35  1  0  0  0
 36 37  1  0  0  0
 36 42  1  0  0  0
 36 43  1  0  0  0
 36 44  1  0  0  0
 37 41  1  0  0  0
 37 38  1  0  0  0
 38 39  2  0  0  0
 38 45  1  0  0  0
 39 40  1  0  0  0
 39 46  1  0  0  0
 40 41  2  0  0  0
M  END
> <s_m_entry_id>
7729

> <s_m_entry_name>
entry

> <i_f3d_flags>
0

> <s_m_job_name>
adme_1000

> <r_psp_Prime_Energy>
-34124.2992470761

> <r_psp_Prime_Solv_GB>
-5190.68745714187

> <r_psp_Prime_Coulomb>
-26474.430463676

> <r_psp_Prime_vdW>
-4060.50633269573

> <r_psp_Prime_Covalent>
4420.88922552664

> <i_psp_model_num>
0

> <r_psp_Prime_Lipo>
-2173.19928310186

> <s_psp_Prime_Energy_Force_Field>
S-OPLS

> <s_psp_Prime_Energy_Solvent_Model>
VSGB2.1

> <r_psp_Prime_Hbond>
-550.112401999757

> <r_psp_Prime_Packing>
-55.8446424272089

> <r_psp_Prime_SelfCont>
-40.4078915603482

> <r_psp_Memb1_x>
103.457542316003

> <r_psp_Memb1_y>
39.4731108300965

> <r_psp_Memb1_z>
48.7987221124676

> <r_psp_Memb2_x>
99.8134167309003

> <r_psp_Memb2_y>
2.81176945184187

> <r_psp_Memb2_z>
23.8404289603493

> <r_psp_MembDummyRadius>
4.45

> <r_psp_Prime_Bond_Covalent>
467.710316554384

> <r_psp_Prime_Bond_SGB>
49975.3854771183

> <r_psp_Prime_Angle_Covalent>
2226.68938215991

> <r_psp_Prime_Angle_SGB>
-21653.4847015129

> <r_psp_Prime_Torsion_Covalent>
1726.48952681235

> <r_psp_Prime_NB14_LJ>
4236.50366338951

> <r_psp_Prime_NB14_Lipo>
0

> <r_psp_Prime_NB14_Elec>
25579.0531753872

> <r_psp_Prime_NB14_SGB>
-15631.2097601528

> <r_psp_Prime_NBShort_LJ>
-7882.00671428512

> <r_psp_Prime_NBShort_Lipo>
-2173.19928310186

> <r_psp_Prime_NBShort_Elec>
-53070.9612720203

> <r_psp_Prime_NBShort_SGB>
18032.2521863661

> <r_psp_Prime_NBLong_LJ>
-415.003281800115

> <r_psp_Prime_NBLong_Lipo>
0

> <r_psp_Prime_NBLong_Elec>
1017.47763295708

> <r_psp_Prime_NBLong_SGB>
-1168.12649423002

> <r_psp_Prime_Self_SGB>
-34745.5041647306

> <s_m_Source_Path>
F:\Dekstop_files\DAC4,5\Molecular Systems Desgn and Engineering\supplementary_str

> <s_m_Source_File>
1000_str.mae

> <i_m_Source_File_Index>
653

> <i_lp_mmshare_version>
53156

> <s_epik_input>
W0NIM11uMVtjSF1bY0hdbmMxLWMoYyhjMjMpW2NIXVtjSF1bY0hdW2NIXTIpYyhbbkhdMylDKD1PKVtOSF1bQ0hdNFtDSDJdW0NIMl1bQ0gyXVtDSDJdW0NIMl00

> <s_epik_cmdline>
J2VwaWtfcHl0aG9uJywgJy1waHQnLCAnMC4wJywgJy1waCcsICc3LjAnLCAnLXRuJywgJzgnLCAnLW1hJywgJzUwMCcsICctaW1hZScsICc8aW5maWxlLm1hZT4nLCAnLW9tYWUnLCAnPG91dGZpbGUubWFlPic=

> <r_lp_tautomer_probability>
1

> <r_epik_Ionization_Penalty>
  0.2587

> <r_epik_Ionization_Penalty_Charging>
  0.2587

> <r_epik_Ionization_Penalty_Neutral>
  0.0000

> <r_epik_State_Penalty>
  0.2503

> <r_epik_Charging_Adjusted_Penalty>
0.509037009240779

> <i_epik_Tot_Q>
0

> <i_epik_Tot_abs_Q>
0

> <s_lp_Force_Field>
S-OPLS

> <r_lp_Energy>
36.373516

> <b_lp_Chiralities_Consistent>
1

> <s_lp_Variant>
ind_1,476462-1

> <s_i_glide_gridfile>
glide-grid_mmpl3

> <i_i_glide_lignum>
1558

> <i_i_glide_rotatable_bonds>
4

> <r_i_docking_score>
-9.0207721399339

> <r_i_glide_ligand_efficiency>
-0.375865505830579

> <r_i_glide_ligand_efficiency_sa>
-1.08418372740653

> <r_i_glide_ligand_efficiency_ln>
-2.15908470934724

> <r_i_glide_gscore>
-9.2710721399339

> <r_i_glide_evdw>
-40.373218536377

> <r_i_glide_ecoul>
-1.59410786628723

> <r_i_glide_energy>
-41.9673264026642

> <r_i_glide_einternal>
4.62174272537231

> <r_i_glide_emodel>
-61.659411038924

> <i_i_glide_confnum>
25

> <i_i_glide_posenum>
194

> <r_i_glide_eff_state_penalty>
0.2503

> <i_rge_num_r_groups>
1

> <r_rge_occupation_R1>
1

> <s_rge_R1>
476462

> <s_rge_R1_s_m_title>
476462

> <s_rge_R1_s_m_entry_id>
17281

> <s_rge_R1_s_m_entry_name>
eMol_BB_r-groups.661

> <s_rge_R1_s_m_smiles>
[*]c1nccn1C

> <b_rge_R1_b_sd_chiral_flag>
0

> <i_rge_R1_i_sd_version>
0

> <s_rge_R1_s_m_Source_File>
eMol_BB_r-groups-dedup.mae

> <i_rge_R1_i_m_Source_File_Index>
533

> <s_rge_R1_s_m_Source_Path>
/Users/konze/projects/pathfinder/r-groups

> <s_rge_R1_s_sd_Source_Path>
/Users/konze/projects/pathfinder/reactant sets/eMolecules

> <s_rge_R1_s_sd_Source_File>
eMol BB r-groups.mae

> <i_rge_R1_i_sd_Source_File_Index>
661

> <r_rge_R1_r_sd_MW>
82.1038

> <i_rge_R1_i_sd_RB>
0

> <i_rge_R1_i_sd_HeavyAtomCount>
6

> <i_rge_R1_i_sd_HBA>
1

> <i_rge_R1_i_sd_HBD>
0

> <r_rge_R1_r_sd_PSA>
17.82

> <i_rge_R1_i_sd_ChiralCenterCount>
0

> <i_rge_R1_i_sd_ChiralCenterCountAllPossible>
0

> <i_rge_R1_i_sd_RingCount>
1

> <r_rge_R1_r_sd_AlogP>
-0.2592

> <s_rge_R1_s_sd_subgroup_title>
eMol BB r-groups

> <s_rge_R1_s_sd_subgroupid>
eMol BB r-groups

> <i_rge_R1_i_sd_subgroup_collapsed>
0

> <s_rge_R1_s_sd_Unique_SMILES_Stereo>
Cn1ccnc1

> <i_rge_R1_i_sd_canvasUID>
602

> <s_rge_R1_s_canvas_Unique_SMILES_Stereo>
Cn1ccnc1

> <s_psp_Prime_MMGBSA_Input_Structure_Hash>
1e14a05c02afbf99727b2b82093a714fa5a40ae819cc9161fdcf2d5b

> <i_psp_number_heavy_atoms>
24

> <r_psp_MMGBSA_dG_Bind>
-43.4731297933904

> <r_psp_MMGBSA_dG_Bind_Coulomb>
-7.55839263516464

> <r_psp_MMGBSA_dG_Bind_Covalent>
2.98557247045301

> <r_psp_MMGBSA_dG_Bind_Hbond>
-0.0147969165765289

> <r_psp_MMGBSA_dG_Bind_Lipo>
-21.1603350470082

> <r_psp_MMGBSA_dG_Bind_Packing>
4.9737991503207e-014

> <r_psp_MMGBSA_dG_Bind_SelfCont>
7.105427357601e-015

> <r_psp_MMGBSA_dG_Bind_Solv_GB>
28.9947872020093

> <r_psp_MMGBSA_dG_Bind_vdW>
-46.7199648670139

> <r_psp_Lig_Strain_Energy>
4.00125744658348

> <r_psp_Lig_Strain_Coulomb>
0.954955315409052

> <r_psp_Lig_Strain_Covalent>
2.98577333856535

> <r_psp_Lig_Strain_Hbond>
0

> <r_psp_Lig_Strain_Lipo>
0.19091233479701

> <r_psp_Lig_Strain_Packing>
0

> <r_psp_Lig_Strain_SelfCont>
0

> <r_psp_Lig_Strain_Solv_GB>
-0.0652245829415392

> <r_psp_Lig_Strain_vdW>
-0.0651589592464283

> <r_psp_Ligand_Energy>
14.4249234510661

> <r_psp_Ligand_Coulomb>
-7.95625709782889

> <r_psp_Ligand_Covalent>
27.4971272347795

> <r_psp_Ligand_Hbond>
0

> <r_psp_Ligand_Lipo>
-1.51431571737317

> <r_psp_Ligand_Packing>
0

> <r_psp_Ligand_SelfCont>
0

> <r_psp_Ligand_Solv_GB>
-13.1304639812857

> <r_psp_Ligand_vdW>
9.52883301277434

> <r_psp_Complex_Energy>
-34124.2992470761

> <r_psp_Complex_Coulomb>
-26474.430463676

> <r_psp_Complex_Covalent>
4420.88922552664

> <r_psp_Complex_Hbond>
-550.112401999757

> <r_psp_Complex_Lipo>
-2173.19928310186

> <r_psp_Complex_Packing>
-55.8446424272089

> <r_psp_Complex_SelfCont>
-40.4078915603482

> <r_psp_Complex_Solv_GB>
-5190.68745714187

> <r_psp_Complex_vdW>
-4060.50633269573

> <r_psp_Receptor_Energy>
-34095.2510407338

> <r_psp_Receptor_Coulomb>
-26458.915813943

> <r_psp_Receptor_Covalent>
4390.40652582141

> <r_psp_Receptor_Hbond>
-550.097605083181

> <r_psp_Receptor_Lipo>
-2150.52463233748

> <r_psp_Receptor_Packing>
-55.8446424272089

> <r_psp_Receptor_SelfCont>
-40.4078915603482

> <r_psp_Receptor_Solv_GB>
-5206.55178036259

> <r_psp_Receptor_vdW>
-4023.31520084149

> <r_psp_MMGBSA_dG_Bind(NS)>
-47.4743872399267

> <r_psp_MMGBSA_dG_Bind(NS)_Coulomb>
-8.51334795061484

> <r_psp_MMGBSA_dG_Bind(NS)_Covalent>
-0.000200868111278396

> <r_psp_MMGBSA_dG_Bind(NS)_Hbond>
-0.0147969165763016

> <r_psp_MMGBSA_dG_Bind(NS)_Lipo>
-21.3512473818005

> <r_psp_MMGBSA_dG_Bind(NS)_Packing>
0

> <r_psp_MMGBSA_dG_Bind(NS)_SelfCont>
0

> <r_psp_MMGBSA_dG_Bind(NS)_Solv_GB>
29.0600117849526

> <r_psp_MMGBSA_dG_Bind(NS)_vdW>
-46.6548059077722

> <r_psp_Rec_Strain_Energy>
-5.0931703299284e-011

> <r_psp_Rec_Strain_Coulomb>
4.00177668780088e-011

> <r_psp_Rec_Strain_Covalent>
-9.09494701772928e-013

> <r_psp_Rec_Strain_Hbond>
-2.27373675443232e-013

> <r_psp_Rec_Strain_Lipo>
-5.00222085975111e-012

> <r_psp_Rec_Strain_Packing>
4.9737991503207e-014

> <r_psp_Rec_Strain_SelfCont>
7.105427357601e-015

> <r_psp_Rec_Strain_Solv_GB>
-1.81898940354586e-012

> <r_psp_Rec_Strain_vdW>
4.54747350886464e-012

> <r_psp_Prime_MMGBSA_ligand_efficiency>
-1.81138040805793

> <r_psp_Prime_MMGBSA_ligand_efficiency_sa>
-2.7170706120869

> <r_psp_Prime_MMGBSA_ligand_efficiency_ln>
-10.4051148114982

> <r_i_glide_lipo>
-4.81442100998671

> <r_i_glide_hbond>
0

> <r_i_glide_metal>
0

> <r_i_glide_rewards>
-2.91848404769546

> <r_i_glide_erotb>
0.719610024510208

> <r_i_glide_esite>
0

> <i_psp_ExecuteFunction_Internal_Entry_Index>
297

> <i_qp_#stars>
1

> <i_qp_#amine>
0

> <i_qp_#amidine>
0

> <i_qp_#acid>
0

> <i_qp_#amide>
0

> <i_qp_#rotor>
2

> <i_qp_#rtvFG>
0

> <i_qp_CNS>
0

> <r_qp_mol_MW>
   322.409

> <r_qp_dipole>
     7.075

> <r_qp_SASA>
   626.977

> <r_qp_FOSA>
   305.159

> <r_qp_FISA>
    65.838

> <r_qp_PISA>
   255.980

> <r_qp_WPSA>
     0.000

> <r_qp_volume>
  1088.163

> <r_qp_donorHB>
     2.000

> <r_qp_accptHB>
     4.000

> <r_qp_dip^2/V>
   0.0459965

> <r_qp_ACxDN^.5/SA>
   0.0090224

> <r_qp_glob>
   0.8160359

> <r_qp_QPpolrz>
    38.555

> <r_qp_QPlogPC16>
    11.020

> <r_qp_QPlogPoct>
    18.095

> <r_qp_QPlogPw>
     9.845

> <r_qp_QPlogPo/w>
     4.091

> <r_qp_QPlogS>
    -5.777

> <r_qp_CIQPlogS>
    -4.893

> <r_qp_QPlogHERG>
    -5.729

> <r_qp_QPPCaco>
  2352.640

> <r_qp_QPlogBB>
    -0.216

> <r_qp_QPPMDCK>
  1247.261

> <r_qp_QPlogKp>
    -1.639

> <r_qp_IP(eV)>
     8.328

> <r_qp_EA(eV)>
     0.521

> <i_qp_#metab>
0

> <r_qp_QPlogKhsa>
     0.644

> <i_qp_HumanOralAbsorption>
3

> <r_qp_PercentHumanOralAbsorption>
   100.000

> <r_qp_SAfluorine>
     0.000

> <r_qp_SAamideO>
     0.000

> <r_qp_PSA>
    63.490

> <i_qp_#NandO>
5

> <i_qp_RuleOfFive>
0

> <i_qp_RuleOfThree>
1

> <i_qp_#ringatoms>
20

> <i_qp_#in34>
0

> <i_qp_#in56>
20

> <i_qp_#noncon>
6

> <i_qp_#nonHatm>
24

> <r_qp_Jm>
0.012364215273397

> <s_m_subgroupid>
1000_str-imp1->adme_1000-out12

> <s_m_subgroup_title>
1000_str->adme_1000-out1

> <b_m_subgroup_collapsed>
0

$$$$
ind_1,476462
                    3D
 Structure written by MMmdl.
 46 49  0  0  1  0            999 V2000
   -3.3340    1.7480    0.3082 C   0  0  0  0  0  0
   -2.2736    0.8414    0.2008 C   0  0  0  0  0  0
   -0.9115    1.2547    0.1731 C   0  0  0  0  0  0
   -0.6283    2.6284    0.2729 C   0  0  0  0  0  0
   -1.6815    3.5345    0.3831 C   0  0  0  0  0  0
   -3.0040    3.1003    0.3977 C   0  0  0  0  0  0
   -0.1046    0.0683    0.0414 C   0  0  0  0  0  0
   -0.9784   -1.0258    0.0350 C   0  0  0  0  0  0
   -2.2650   -0.5305    0.1036 N   0  0  0  0  0  0
   -0.6799   -2.4354   -0.1255 C   0  0  0  0  0  0
   -1.6506   -3.2728    0.2935 N   0  0  0  0  0  0
    0.3942   -2.8174   -0.5923 O   0  0  0  0  0  0
   -1.6009   -4.7357    0.2426 C   0  0  0  0  0  0
   -2.6034   -5.4083    1.2115 C   0  0  0  0  0  0
   -2.5768   -6.9485    1.1588 C   0  0  0  0  0  0
   -2.7165   -7.4838   -0.2754 C   0  0  0  0  0  0
   -1.6429   -6.8874   -1.1997 C   0  0  0  0  0  0
   -1.6449   -5.3457   -1.1844 C   0  0  0  0  0  0
   -4.3646    1.4251    0.3248 H   0  0  0  0  0  0
[truncated: 12,651,130 more chars]
