# Supplementary material for: Molecular insights into Mmpl3 lead to the development of novel indole-2-carboxamides as antitubercular agents
Source: Royal Society of Chemistry journal article supplement (doi:10.1039/d1me00122a), 2022-01-01
Supplement: d1me00122a4.sdf [file d1me00122a4.sdf]

B38-Mmpl3
                    3D
 Structure written by MMmdl.
  0  0  0     0  0            999 V3000
M  V30 BEGIN CTAB
M  V30 COUNTS 14493 14652 0 0 0
M  V30 BEGIN ATOM
M  V30 1 C  118.4809 2.2772 23.8656 0
M  V30 2 C  118.0821 2.8620 25.2160 0
M  V30 3 O  117.1093 3.6097 25.2835 0
M  V30 4 H  118.7180 3.0791 23.1660 0
M  V30 5 H  119.3533 1.6276 23.9474 0
M  V30 6 H  117.6582 1.6936 23.4523 0
M  V30 7 N  118.8385 2.4954 26.2667 0
M  V30 8 H  119.6075 1.8720 26.0678 0
M  V30 9 C  118.7633 2.8839 27.6861 0 CFG=2
M  V30 10 H  119.5328 2.2552 28.1367 0
M  V30 11 C  117.4703 2.5121 28.4456 0
M  V30 12 O  117.5754 2.0466 29.5795 0
M  V30 13 C  119.2394 4.3406 27.9333 0
M  V30 14 H  119.5139 4.4271 28.9857 0
M  V30 15 H  120.1750 4.4891 27.3941 0
M  V30 16 C  118.2675 5.4981 27.6110 0
M  V30 17 H  117.2418 5.1475 27.5314 0
M  V30 18 H  118.2628 6.2025 28.4432 0
M  V30 19 S  118.6382 6.4485 26.1085 0
M  V30 20 C  120.1215 7.3451 26.6401 0
M  V30 21 H  120.4590 8.0114 25.8463 0
M  V30 22 H  119.9081 7.9445 27.5251 0
M  V30 23 H  120.9315 6.6548 26.8737 0
M  V30 24 N  116.2916 2.6834 27.8258 0
M  V30 25 H  116.2861 3.0857 26.8964 0
M  V30 26 C  114.9875 2.3164 28.3812 0 CFG=2
M  V30 27 H  114.9582 2.6331 29.4260 0
M  V30 28 C  114.7353 0.7981 28.3620 0
M  V30 29 O  114.0056 0.3054 29.2194 0
M  V30 30 C  113.8670 3.0559 27.6260 0
M  V30 31 H  113.9047 2.8121 26.5633 0
M  V30 32 H  112.9056 2.6922 27.9847 0
M  V30 33 C  113.8645 4.5666 27.7793 0
M  V30 34 C  113.3897 5.1590 28.9685 0
M  V30 35 H  112.9682 4.5477 29.7522 0
M  V30 36 C  114.4609 5.3859 26.7973 0
M  V30 37 H  114.8698 4.9503 25.8977 0
M  V30 38 C  113.4558 6.5355 29.1336 0
M  V30 39 H  113.0760 6.9860 30.0385 0
M  V30 40 C  114.5205 6.7606 26.9827 0
M  V30 41 H  114.9692 7.3861 26.2250 0
M  V30 42 C  114.0130 7.3331 28.1422 0
M  V30 43 H  114.0604 8.4033 28.2773 0
M  V30 44 N  115.3605 0.0806 27.4121 0
M  V30 45 H  115.9332 0.5574 26.7306 0
M  V30 46 C  115.3644 -1.3815 27.3578 0 CFG=2
M  V30 47 H  114.3552 -1.7389 27.5667 0
M  V30 48 C  116.3061 -2.0082 28.4008 0
M  V30 49 O  116.0056 -3.0968 28.8934 0
M  V30 50 C  115.7456 -1.8335 25.9409 0
M  V30 51 H  115.7661 -2.9212 25.8668 0
M  V30 52 H  115.0261 -1.4679 25.2077 0
M  V30 53 H  116.7305 -1.4626 25.6533 0
M  V30 54 N  117.4092 -1.3067 28.7244 0
M  V30 55 H  117.5777 -0.4148 28.2822 0
M  V30 56 C  118.3692 -1.7089 29.7492 0 CFG=2
M  V30 57 H  118.5123 -2.7878 29.6631 0
M  V30 58 C  117.8481 -1.4490 31.1695 0
M  V30 59 O  117.9236 -2.3604 31.9929 0
M  V30 60 C  119.7424 -1.0557 29.4985 0
M  V30 61 H  120.1217 -1.3739 28.5270 0
M  V30 62 H  119.6339 0.0283 29.4401 0
M  V30 63 C  120.7963 -1.3734 30.5217 0
M  V30 64 C  121.3328 -0.4945 31.3989 0
M  V30 65 H  121.0872 0.5568 31.4394 0
M  V30 66 C  121.3859 -2.6712 30.8450 0
M  V30 67 N  122.2219 -1.1500 32.2254 0
M  V30 68 H  122.7368 -0.6779 32.9554 0
M  V30 69 C  121.2374 -3.9849 30.3392 0
M  V30 70 H  120.5627 -4.1614 29.5157 0
M  V30 71 C  122.2940 -2.4964 31.9336 0
M  V30 72 C  121.9542 -5.0668 30.8904 0
M  V30 73 H  121.8226 -6.0601 30.4873 0
M  V30 74 C  123.0208 -3.5659 32.4864 0
M  V30 75 H  123.6985 -3.3987 33.3106 0
M  V30 76 C  122.8453 -4.8593 31.9614 0
M  V30 77 H  123.3932 -5.6911 32.3793 0
M  V30 78 N  117.2996 -0.2458 31.4297 0
M  V30 79 H  117.2857 0.4805 30.7246 0
M  V30 80 C  116.6520 0.0565 32.7079 0 CFG=2
M  V30 81 H  117.3389 -0.2747 33.4853 0
M  V30 82 C  115.3529 -0.7406 32.9100 0
M  V30 83 O  115.0946 -1.1639 34.0307 0
M  V30 84 C  116.4570 1.5700 32.9374 0
M  V30 85 H  117.4208 2.0753 32.8661 0
M  V30 86 H  115.8240 1.9990 32.1588 0
M  V30 87 C  115.8762 1.8821 34.2909 0
M  V30 88 C  114.6202 2.3202 34.5379 0
M  V30 89 H  113.8972 2.5730 33.7763 0
M  V30 90 C  116.4752 1.6297 35.6006 0
M  V30 91 N  114.3924 2.3251 35.8991 0
M  V30 92 H  113.4943 2.5814 36.2929 0
M  V30 93 C  117.7354 1.1608 36.0416 0
M  V30 94 H  118.5049 0.9480 35.3146 0
M  V30 95 C  115.4957 1.8898 36.6061 0
M  V30 96 C  118.0027 0.9470 37.4091 0
M  V30 97 H  118.9708 0.5796 37.7155 0
M  V30 98 C  115.7490 1.6708 37.9732 0
M  V30 99 H  114.9835 1.8504 38.7110 0
M  V30 100 C  117.0102 1.1978 38.3750 0
M  V30 101 H  117.2158 1.0252 39.4208 0
M  V30 102 N  114.6071 -0.9940 31.8225 0
M  V30 103 H  114.8821 -0.5929 30.9362 0
M  V30 104 C  113.4084 -1.8305 31.8074 0
M  V30 105 H  112.6664 -1.4332 32.5021 0
M  V30 106 H  112.9852 -1.7626 30.8080 0
M  V30 107 C  113.6957 -3.3095 32.1330 0
M  V30 108 O  112.7727 -4.0236 32.5197 0
M  V30 109 N  114.9595 -3.7574 32.0159 0
M  V30 110 H  115.6740 -3.1219 31.6891 0
M  V30 111 C  115.4279 -5.0557 32.4931 0 CFG=2
M  V30 112 H  114.5944 -5.7604 32.4777 0
M  V30 113 C  115.9163 -4.9661 33.9466 0
M  V30 114 O  115.4133 -5.7141 34.7805 0
M  V30 115 C  116.4994 -5.6108 31.5295 0
M  V30 116 H  116.0335 -5.7255 30.5525 0
M  V30 117 H  117.3000 -4.8833 31.3924 0
M  V30 118 C  117.1213 -6.9555 31.9651 0
M  V30 119 H  117.7105 -6.7497 32.8594 0
M  V30 120 H  116.3724 -7.6895 32.2659 0
M  V30 121 C  118.0852 -7.5666 30.9363 0
M  V30 122 H  119.0522 -7.0652 30.8832 0
M  V30 123 H  118.3014 -8.5738 31.2933 0
M  V30 124 N  117.4478 -7.8097 29.6328 0
M  V30 125 H  116.9364 -8.6773 29.5527 0
M  V30 126 C  117.4395 -6.9711 28.5824 0
M  V30 127 N  118.0760 -5.7915 28.6195 0
M  V30 128 H  118.0586 -5.1676 27.8259 0
M  V30 129 H  118.5782 -5.5191 29.4520 0
M  V30 130 N  116.7826 -7.3266 27.4715 0 CHG=1
M  V30 131 H  116.7880 -6.7224 26.6634 0
M  V30 132 H  116.3121 -8.2192 27.4199 0
M  V30 133 N  116.8964 -4.0875 34.2212 0
M  V30 134 H  117.2545 -3.4900 33.4876 0
M  V30 135 C  117.5881 -4.0095 35.5142 0 CFG=2
M  V30 136 H  117.8769 -5.0280 35.7672 0
M  V30 137 C  116.7277 -3.4820 36.6861 0
M  V30 138 O  117.0341 -3.8311 37.8263 0
M  V30 139 C  118.8934 -3.1788 35.4351 0 CFG=2
M  V30 140 H  119.3647 -3.1677 36.4186 0
M  V30 141 O  118.6416 -1.8307 35.1009 0
M  V30 142 H  118.4589 -1.7794 34.1589 0
M  V30 143 C  119.9185 -3.7568 34.4480 0
M  V30 144 H  120.8288 -3.1572 34.4430 0
M  V30 145 H  120.1991 -4.7718 34.7303 0
M  V30 146 H  119.5409 -3.7932 33.4271 0
M  V30 147 N  115.6358 -2.7432 36.4096 0
M  V30 148 H  115.4498 -2.4532 35.4578 0
M  V30 149 C  114.6156 -2.3847 37.4049 0 CFG=2
M  V30 150 H  115.1375 -1.9371 38.2535 0
M  V30 151 C  113.8421 -3.6163 37.9302 0
M  V30 152 O  113.3979 -3.5895 39.0759 0
M  V30 153 C  113.6014 -1.3373 36.8501 0
M  V30 154 H  114.1925 -0.5767 36.3435 0
M  V30 155 C  112.5936 -1.8868 35.8192 0
M  V30 156 H  112.0672 -1.0732 35.3195 0
M  V30 157 H  113.0829 -2.4829 35.0502 0
M  V30 158 H  111.8402 -2.5144 36.2941 0
M  V30 159 C  112.8336 -0.6075 37.9649 0
M  V30 160 H  112.2410 0.2110 37.5556 0
M  V30 161 H  112.1501 -1.2706 38.4945 0
M  V30 162 H  113.5162 -0.1786 38.6968 0
M  V30 163 N  113.7351 -4.6720 37.0998 0
M  V30 164 H  114.1356 -4.6117 36.1738 0
M  V30 165 C  113.1557 -5.9616 37.4616 0 CFG=2
M  V30 166 H  112.3450 -5.7853 38.1687 0
M  V30 167 C  114.1918 -6.8819 38.1368 0
M  V30 168 O  113.8414 -7.5346 39.1175 0
M  V30 169 C  112.5127 -6.6236 36.2250 0
M  V30 170 H  111.8581 -5.9047 35.7288 0
M  V30 171 H  113.2679 -6.8914 35.4869 0
M  V30 172 C  111.6912 -7.8613 36.5411 0
M  V30 173 C  110.3003 -7.7492 36.7375 0
M  V30 174 H  109.8119 -6.7897 36.6443 0
M  V30 175 C  112.3111 -9.1241 36.6529 0
M  V30 176 H  113.3754 -9.2183 36.5071 0
M  V30 177 C  109.5392 -8.8915 37.0449 0
M  V30 178 H  108.4731 -8.8018 37.1821 0
M  V30 179 C  111.5509 -10.2641 36.9746 0
M  V30 180 H  112.0323 -11.2267 37.0620 0
M  V30 181 C  110.1628 -10.1470 37.1721 0
M  V30 182 O  109.4211 -11.2495 37.4772 0
M  V30 183 H  108.4757 -11.0723 37.4597 0
M  V30 184 N  115.4380 -6.9268 37.6230 0
M  V30 185 H  115.6575 -6.3687 36.8089 0
M  V30 186 C  116.5313 -7.7518 38.1677 0 CFG=2
M  V30 187 H  116.1928 -8.7891 38.1532 0
M  V30 188 C  116.8961 -7.4043 39.6214 0
M  V30 189 O  117.2260 -8.3104 40.3852 0
M  V30 190 C  117.7997 -7.6313 37.2940 0
M  V30 191 H  118.1122 -6.5878 37.2852 0
M  V30 192 H  118.6270 -8.1699 37.7604 0
M  V30 193 C  117.6518 -8.1333 35.8471 0
M  V30 194 H  116.7953 -7.7220 35.3186 0
M  V30 195 H  118.5291 -7.7391 35.3318 0
M  V30 196 C  117.7371 -9.6609 35.7145 0
M  V30 197 H  118.7934 -9.9180 35.8014 0
M  V30 198 H  117.2346 -10.2142 36.5081 0
M  V30 199 N  117.4153 -10.1112 34.3531 0
M  V30 200 H  118.1971 -10.1924 33.7192 0
M  V30 201 C  116.1807 -10.3709 33.8901 0
M  V30 202 N  115.1053 -10.2587 34.6788 0
M  V30 203 H  114.1895 -10.5344 34.3245 0
M  V30 204 H  115.2044 -9.9755 35.6413 0
M  V30 205 N  116.0145 -10.7547 32.6188 0 CHG=1
M  V30 206 H  115.0745 -10.9145 32.2635 0
M  V30 207 H  116.8059 -10.9050 32.0120 0
M  V30 208 N  116.8181 -6.1087 39.9625 0
M  V30 209 H  116.5489 -5.4295 39.2632 0
M  V30 210 C  117.1593 -5.5647 41.2750 0 CFG=2
M  V30 211 H  117.4725 -6.3607 41.9524 0
M  V30 212 C  115.9290 -4.9145 41.9342 0
M  V30 213 O  116.0947 -3.9693 42.7015 0
M  V30 214 C  118.3394 -4.5741 41.1209 0
M  V30 215 H  117.9895 -3.6669 40.6249 0
M  V30 216 H  118.6942 -4.2643 42.1027 0
M  V30 217 C  119.5369 -5.1094 40.3504 0
M  V30 218 C  120.2153 -6.2614 40.8012 0
M  V30 219 H  119.8990 -6.7591 41.7062 0
M  V30 220 C  119.9632 -4.4694 39.1675 0
M  V30 221 H  119.4598 -3.5808 38.8174 0
M  V30 222 C  121.2971 -6.7806 40.0636 0
M  V30 223 H  121.8043 -7.6682 40.4125 0
M  V30 224 C  121.0428 -4.9890 38.4284 0
M  V30 225 H  121.3585 -4.4980 37.5194 0
M  V30 226 C  121.7086 -6.1468 38.8743 0
M  V30 227 O  122.7512 -6.6513 38.1536 0
M  V30 228 H  123.1458 -7.4294 38.5542 0
M  V30 229 N  114.7182 -5.4261 41.6375 0
M  V30 230 H  114.6635 -6.2043 40.9952 0
M  V30 231 C  113.4309 -4.8806 42.0898 0 CFG=2
M  V30 232 H  113.3885 -3.8571 41.7140 0
M  V30 233 C  113.2633 -4.7801 43.6157 0
M  V30 234 O  112.6272 -3.8343 44.0761 0
M  V30 235 C  112.2725 -5.6581 41.4280 0
M  V30 236 H  111.3330 -5.1463 41.6333 0
M  V30 237 H  112.4040 -5.5881 40.3533 0
M  V30 238 C  112.1215 -7.1465 41.8043 0
M  V30 239 H  113.0753 -7.6736 41.7800 0
M  V30 240 H  111.7729 -7.1999 42.8357 0
M  V30 241 C  111.1149 -7.8576 40.8806 0
M  V30 242 H  110.1379 -7.4197 41.0607 0
M  V30 243 H  111.3105 -7.6898 39.8217 0
M  V30 244 N  110.9531 -9.2852 41.1887 0
M  V30 245 H  110.1312 -9.5177 41.7273 0
M  V30 246 C  111.7769 -10.2858 40.8319 0
M  V30 247 N  112.9054 -10.0590 40.1467 0
M  V30 248 H  113.5114 -10.8219 39.8839 0
M  V30 249 H  113.1487 -9.1149 39.8667 0
M  V30 250 N  111.4587 -11.5431 41.1642 0 CHG=1
M  V30 251 H  112.0561 -12.3112 40.8946 0
M  V30 252 H  110.6017 -11.7390 41.6610 0
M  V30 253 N  113.8702 -5.7149 44.3645 0
M  V30 254 H  114.3804 -6.4591 43.9122 0
M  V30 255 C  113.8582 -5.7338 45.8277 0 CFG=2
M  V30 256 H  112.8460 -5.4959 46.1602 0
M  V30 257 C  114.7992 -4.6920 46.4630 0
M  V30 258 O  114.5275 -4.2638 47.5844 0
M  V30 259 C  114.1881 -7.1533 46.3265 0
M  V30 260 H  115.1876 -7.4454 45.9998 0
M  V30 261 H  114.2141 -7.1602 47.4174 0
M  V30 262 C  113.1945 -8.2099 45.8756 0
M  V30 263 C  111.9258 -8.2984 46.4872 0
M  V30 264 H  111.6829 -7.6666 47.3293 0
M  V30 265 C  113.4632 -9.0001 44.7376 0
M  V30 266 H  114.4105 -8.9155 44.2254 0
M  V30 267 C  110.9827 -9.1955 46.0034 0
M  V30 268 H  110.0148 -9.2658 46.4777 0
M  V30 269 C  112.5089 -9.8947 44.2736 0
M  V30 270 H  112.7265 -10.5085 43.4130 0
M  V30 271 C  111.2749 -9.9933 44.9042 0
M  V30 272 H  110.5349 -10.6869 44.5333 0
M  V30 273 N  115.8644 -4.2902 45.7438 0
M  V30 274 H  116.0147 -4.6661 44.8182 0
M  V30 275 C  116.8187 -3.2676 46.1884 0 CFG=2
M  V30 276 H  116.8640 -3.3005 47.2793 0
M  V30 277 C  116.3137 -1.8615 45.8099 0
M  V30 278 O  116.4774 -0.9474 46.6137 0
M  V30 279 C  118.2897 -3.5066 45.6758 0 CFG=2
M  V30 280 H  118.9279 -3.2629 46.5266 0
M  V30 281 C  118.8279 -2.6497 44.4935 0
M  V30 282 H  119.7033 -3.1447 44.0716 0
M  V30 283 H  118.1063 -2.6234 43.6798 0
M  V30 284 C  118.5725 -5.0010 45.4143 0
M  V30 285 H  119.6365 -5.1794 45.2559 0
M  V30 286 H  118.2677 -5.6168 46.2613 0
M  V30 287 H  118.0476 -5.3605 44.5284 0
M  V30 288 C  119.2696 -1.2192 44.8571 0
M  V30 289 H  118.6155 -0.4789 44.3951 0
M  V30 290 H  119.2585 -1.0430 45.9330 0
M  V30 291 H  120.2827 -1.0219 44.5059 0
M  V30 292 N  115.6994 -1.7170 44.6199 0
M  V30 293 H  115.6163 -2.5211 44.0115 0
M  V30 294 C  115.1730 -0.4573 44.0859 0 CFG=2
M  V30 295 H  115.9708 0.2850 44.1605 0
M  V30 296 C  113.9778 0.0739 44.9026 0
M  V30 297 O  113.9637 1.2593 45.2310 0
M  V30 298 C  114.7837 -0.6001 42.5823 0
M  V30 299 H  114.2165 -1.5261 42.4709 0
M  V30 300 C  113.9033 0.5320 42.0163 0
M  V30 301 H  113.7907 0.4372 40.9374 0
M  V30 302 H  112.8987 0.5176 42.4374 0
M  V30 303 H  114.3384 1.5104 42.2157 0
M  V30 304 C  116.0365 -0.7392 41.6981 0
M  V30 305 H  115.7667 -0.9423 40.6611 0
M  V30 306 H  116.6307 0.1740 41.7126 0
M  V30 307 H  116.6827 -1.5503 42.0275 0
M  V30 308 N  113.0404 -0.8196 45.2673 0
M  V30 309 H  113.1185 -1.7793 44.9588 0
M  V30 310 C  111.9164 -0.5228 46.1641 0 CFG=2
M  V30 311 H  111.4784 0.4250 45.8456 0
M  V30 312 C  112.3571 -0.3581 47.6433 0
M  V30 313 O  111.5610 0.1049 48.4568 0
M  V30 314 C  110.8327 -1.6424 46.0606 0 CFG=2
M  V30 315 H  110.7797 -1.9134 45.0046 0
M  V30 316 C  109.4232 -1.1444 46.4546 0
M  V30 317 H  109.3613 -0.9983 47.5331 0
M  V30 318 H  109.2409 -0.1667 46.0094 0
M  V30 319 C  111.1836 -2.9376 46.8267 0
M  V30 320 H  110.5310 -3.7595 46.5389 0
M  V30 321 H  112.2048 -3.2476 46.6187 0
M  V30 322 H  111.0899 -2.8172 47.9062 0
M  V30 323 C  108.2935 -2.0852 46.0145 0
M  V30 324 H  107.3284 -1.5822 46.0724 0
M  V30 325 H  108.4331 -2.4217 44.9871 0
M  V30 326 H  108.2401 -2.9667 46.6534 0
M  V30 327 N  113.6066 -0.7363 47.9642 0
M  V30 328 H  114.2017 -1.1069 47.2372 0
M  V30 329 C  114.1987 -0.6183 49.2893 0
M  V30 330 H  113.4564 -0.7770 50.0736 0
M  V30 331 H  114.9569 -1.3933 49.4071 0
M  V30 332 C  114.8471 0.7614 49.4359 0
M  V30 333 O  114.3255 1.6082 50.1591 0
M  V30 334 N  115.9998 0.9634 48.7736 0
M  V30 335 H  116.3471 0.2378 48.1591 0
M  V30 336 C  116.9006 2.1019 48.9827 0 CFG=2
M  V30 337 H  117.0638 2.1782 50.0595 0
M  V30 338 C  116.3413 3.4620 48.5186 0
M  V30 339 O  116.6089 4.4610 49.1851 0
M  V30 340 C  118.2929 1.8840 48.3158 0
M  V30 341 H  118.9392 2.6864 48.6764 0
M  V30 342 C  118.9627 0.5865 48.8028 0
M  V30 343 H  119.9827 0.5054 48.4260 0
M  V30 344 H  119.0139 0.5552 49.8914 0
M  V30 345 H  118.4212 -0.2988 48.4692 0
M  V30 346 C  118.3278 1.9793 46.7745 0
M  V30 347 H  119.2979 1.6719 46.3835 0
M  V30 348 H  117.5721 1.3479 46.3105 0
M  V30 349 H  118.1649 3.0002 46.4298 0
M  V30 350 N  115.5742 3.4823 47.4131 0
M  V30 351 H  115.3766 2.6214 46.9219 0
M  V30 352 C  115.0145 4.7112 46.8384 0 CFG=2
M  V30 353 H  115.7708 5.4897 46.9229 0
M  V30 354 C  113.7709 5.2097 47.5923 0
M  V30 355 O  113.5342 6.4166 47.6216 0
M  V30 356 C  114.7400 4.5349 45.3343 0
M  V30 357 H  113.9189 3.8352 45.1952 0
M  V30 358 H  114.4007 5.4815 44.9106 0
M  V30 359 C  115.9598 4.0341 44.5452 0
M  V30 360 H  116.8362 4.6333 44.7947 0
M  V30 361 H  116.1887 3.0065 44.8278 0
M  V30 362 S  115.7479 4.0733 42.7503 0
M  V30 363 C  117.2868 3.2652 42.2442 0
M  V30 364 H  117.3175 3.1610 41.1595 0
M  V30 365 H  118.1478 3.8536 42.5618 0
M  V30 366 H  117.3598 2.2735 42.6904 0
M  V30 367 N  113.0369 4.2817 48.2269 0
M  V30 368 H  113.3003 3.3099 48.1479 0
M  V30 369 C  111.9510 4.5711 49.1620 0 CFG=2
M  V30 370 H  111.3293 5.3631 48.7394 0
M  V30 371 C  112.5016 5.0635 50.5176 0
M  V30 372 O  111.9593 6.0180 51.0733 0
M  V30 373 C  111.0716 3.3034 49.3748 0
M  V30 374 H  111.7413 2.4750 49.6084 0
M  V30 375 C  110.0587 3.3637 50.5377 0
M  V30 376 H  109.4545 2.4567 50.5723 0
M  V30 377 H  110.5492 3.4427 51.5078 0
M  V30 378 H  109.3747 4.2038 50.4327 0
M  V30 379 C  110.3423 2.9308 48.0710 0
M  V30 380 H  109.6910 2.0672 48.2071 0
M  V30 381 H  109.7271 3.7539 47.7152 0
M  V30 382 H  111.0459 2.6801 47.2771 0
M  V30 383 N  113.5821 4.4233 51.0009 0
M  V30 384 H  113.9614 3.6394 50.4863 0
M  V30 385 C  114.2411 4.7252 52.2714 0 CFG=2
M  V30 386 H  113.4714 4.7155 53.0459 0
M  V30 387 C  114.9200 6.1033 52.3160 0
M  V30 388 O  114.8238 6.7654 53.3478 0
M  V30 389 C  115.2487 3.6144 52.6017 0
M  V30 390 H  115.7517 3.8046 53.5505 0
M  V30 391 H  114.7517 2.6478 52.6871 0
M  V30 392 H  116.0157 3.5273 51.8317 0
M  V30 393 N  115.5679 6.5231 51.2123 0
M  V30 394 H  115.6350 5.9165 50.4056 0
M  V30 395 C  116.2132 7.8377 51.1017 0 CFG=2
M  V30 396 H  116.7292 8.0128 52.0481 0
M  V30 397 C  115.2062 8.9930 50.9474 0
M  V30 398 O  115.5245 10.1073 51.3606 0
M  V30 399 C  117.3203 7.8092 50.0164 0
M  V30 400 H  118.0067 8.6406 50.1824 0
M  V30 401 H  117.9203 6.9172 50.2024 0
M  V30 402 C  116.8752 7.8249 48.5317 0
M  V30 403 H  115.9999 7.1825 48.4545 0
M  V30 404 C  116.4845 9.2236 48.0075 0
M  V30 405 H  116.9984 9.4739 47.0789 0
M  V30 406 H  115.4156 9.2742 47.8015 0
M  V30 407 H  116.7193 10.0136 48.7207 0
M  V30 408 C  117.9602 7.2077 47.6298 0
M  V30 409 H  117.5598 6.9659 46.6451 0
M  V30 410 H  118.7938 7.8957 47.4852 0
M  V30 411 H  118.3643 6.2861 48.0491 0
M  V30 412 N  114.0111 8.7109 50.3946 0
M  V30 413 H  113.8226 7.7734 50.0690 0
M  V30 414 C  112.9012 9.6627 50.3114 0 CFG=2
M  V30 415 H  113.3026 10.6156 49.9606 0
M  V30 416 C  112.2841 9.9251 51.6956 0
M  V30 417 O  112.0630 11.0855 52.0330 0
M  V30 418 C  111.8120 9.2152 49.3191 0
M  V30 419 S  112.3626 9.4832 47.6129 0
M  V30 420 H  111.5592 8.1637 49.4543 0
M  V30 421 H  110.8964 9.7869 49.4669 0
M  V30 422 H  113.2157 8.4529 47.5796 0
M  V30 423 N  112.0586 8.8582 52.4827 0
M  V30 424 H  112.2605 7.9305 52.1339 0
M  V30 425 C  111.5411 8.9327 53.8538 0 CFG=2
M  V30 426 H  110.6996 9.6273 53.8553 0
M  V30 427 C  112.5669 9.4914 54.8590 0
M  V30 428 O  112.1613 10.1676 55.8047 0
M  V30 429 C  111.0412 7.5382 54.2889 0
M  V30 430 H  111.8534 6.8209 54.1557 0
M  V30 431 H  110.8173 7.5395 55.3571 0
M  V30 432 C  109.7870 7.0524 53.5265 0
M  V30 433 H  110.0155 7.0997 52.4629 0
M  V30 434 C  109.4865 5.5710 53.8315 0
M  V30 435 H  109.3023 5.0196 52.9099 0
M  V30 436 H  110.3171 5.0794 54.3388 0
M  V30 437 H  108.6095 5.4448 54.4665 0
M  V30 438 C  108.5590 7.9574 53.7630 0
M  V30 439 H  107.6450 7.3878 53.9310 0
M  V30 440 H  108.6925 8.6107 54.6256 0
M  V30 441 H  108.3800 8.5953 52.8967 0
M  V30 442 N  113.8672 9.2492 54.6120 0
M  V30 443 H  114.1125 8.6487 53.8359 0
M  V30 444 C  114.9821 9.8274 55.3657 0
M  V30 445 H  114.8380 9.6701 56.4353 0
M  V30 446 H  115.8992 9.3087 55.0862 0
M  V30 447 C  115.1447 11.3263 55.0579 0
M  V30 448 O  115.5601 12.0859 55.9325 0
M  V30 449 N  114.7613 11.7540 53.8417 0
M  V30 450 H  114.4556 11.0726 53.1605 0
M  V30 451 C  114.6712 13.1547 53.4397 0
M  V30 452 H  115.5624 13.7032 53.7464 0
M  V30 453 H  114.6294 13.1993 52.3511 0
M  V30 454 C  113.4069 13.8248 54.0040 0
M  V30 455 O  113.3693 15.0499 54.0773 0
M  V30 456 N  112.3861 13.0454 54.4070 0
M  V30 457 H  112.4751 12.0434 54.3136 0
M  V30 458 C  111.1204 13.5424 54.9455 0
M  V30 459 H  110.7349 14.3620 54.3379 0
M  V30 460 H  110.3832 12.7408 54.9092 0
M  V30 461 C  111.2820 14.0008 56.3982 0
M  V30 462 O  110.7810 15.0673 56.7502 0
M  V30 463 N  112.0034 13.2209 57.2232 0
M  V30 464 H  112.3803 12.3478 56.8809 0
M  V30 465 C  112.3138 13.5605 58.6166 0 CFG=2
M  V30 466 H  111.4105 13.9725 59.0720 0
M  V30 467 C  113.4135 14.6375 58.7447 0
M  V30 468 O  113.3927 15.3938 59.7151 0
M  V30 469 C  112.7319 12.3105 59.4402 0
M  V30 470 H  112.9458 12.6475 60.4563 0
M  V30 471 C  111.5691 11.3113 59.5665 0
M  V30 472 H  111.8372 10.4753 60.2128 0
M  V30 473 H  110.6868 11.7863 59.9963 0
M  V30 474 H  111.2866 10.8999 58.5969 0
M  V30 475 C  114.0048 11.6001 58.9390 0
M  V30 476 H  114.2345 10.7310 59.5559 0
M  V30 477 H  113.8770 11.2479 57.9169 0
M  V30 478 H  114.8806 12.2479 58.9654 0
M  V30 479 N  114.3138 14.7209 57.7485 0
M  V30 480 H  114.2754 14.0463 56.9974 0
M  V30 481 C  115.2980 15.7941 57.5963 0 CFG=2
M  V30 482 H  115.7686 15.9641 58.5666 0
M  V30 483 C  114.6365 17.1157 57.1655 0
M  V30 484 O  114.8978 18.1557 57.7704 0
M  V30 485 C  116.3939 15.3263 56.6116 0
M  V30 486 H  116.9246 14.4754 57.0406 0
M  V30 487 H  115.9099 14.9446 55.7127 0
M  V30 488 C  117.4416 16.3468 56.1880 0
M  V30 489 C  118.2186 17.0242 57.1527 0
M  V30 490 H  118.0433 16.8611 58.2059 0
M  V30 491 C  117.7104 16.5620 54.8186 0
M  V30 492 H  117.1425 16.0424 54.0607 0
M  V30 493 C  119.2217 17.8965 56.7493 0
M  V30 494 H  119.8130 18.4155 57.4891 0
M  V30 495 C  118.7189 17.4371 54.4372 0
M  V30 496 H  118.9207 17.6006 53.3893 0
M  V30 497 C  119.4751 18.0965 55.3977 0
M  V30 498 H  120.2577 18.7745 55.0909 0
M  V30 499 N  113.7599 17.0230 56.1520 0
M  V30 500 H  113.6103 16.1179 55.7246 0
M  V30 501 C  113.0204 18.1268 55.5469 0
M  V30 502 H  113.6994 18.9434 55.3086 0
M  V30 503 H  112.6041 17.7674 54.6084 0
M  V30 504 C  111.8711 18.6546 56.4169 0
M  V30 505 O  111.2821 19.6734 56.0621 0
M  V30 506 N  111.5639 17.9998 57.5508 0
M  V30 507 H  112.0580 17.1464 57.7693 0
M  V30 508 C  110.6042 18.4569 58.5590 0 CFG=2
M  V30 509 H  109.6712 18.6814 58.0399 0
M  V30 510 C  111.0668 19.7470 59.2704 0
M  V30 511 O  110.2259 20.5700 59.6312 0
M  V30 512 C  110.3600 17.2937 59.5503 0
M  V30 513 H  110.0705 16.4047 58.9885 0
M  V30 514 H  111.3088 17.0454 60.0274 0
M  V30 515 C  109.3033 17.5364 60.6534 0
M  V30 516 H  109.6221 18.3960 61.2436 0
M  V30 517 C  107.9122 17.8691 60.0730 0
M  V30 518 H  107.1030 17.3688 60.6048 0
M  V30 519 H  107.7170 18.9400 60.1365 0
M  V30 520 H  107.8282 17.5842 59.0240 0
M  V30 521 C  109.2570 16.3444 61.6337 0
M  V30 522 H  109.3952 16.6828 62.6609 0
M  V30 523 H  108.3118 15.8031 61.5950 0
M  V30 524 H  110.0423 15.6155 61.4295 0
M  V30 525 N  112.3934 19.9125 59.4194 0
M  V30 526 H  113.0142 19.1920 59.0790 0
M  V30 527 C  113.0360 21.0866 60.0131 0 CFG=2
M  V30 528 H  112.4227 21.4006 60.8599 0
M  V30 529 C  113.1365 22.3076 59.0720 0
M  V30 530 O  113.5431 23.3684 59.5441 0
M  V30 531 C  114.4079 20.6645 60.5857 0
M  V30 532 H  114.7982 21.4532 61.2301 0
M  V30 533 H  114.3066 19.7777 61.2127 0
M  V30 534 O  115.3723 20.4121 59.5812 0
M  V30 535 H  115.1475 19.5871 59.1363 0
M  V30 536 N  112.7684 22.1612 57.7836 0
M  V30 537 H  112.4164 21.2660 57.4728 0
M  V30 538 C  112.8546 23.2041 56.7515 0 CFG=2
M  V30 539 H  113.8945 23.5320 56.7471 0
M  V30 540 C  112.0013 24.4572 57.0295 0
M  V30 541 O  112.3897 25.5364 56.5881 0
M  V30 542 C  112.5365 22.5725 55.3760 0
M  V30 543 H  113.1940 21.7163 55.2321 0
M  V30 544 H  111.5247 22.1671 55.4134 0
M  V30 545 C  112.6304 23.4876 54.1286 0
M  V30 546 H  111.8635 24.2574 54.2235 0
M  V30 547 C  113.9878 24.2146 53.9985 0
M  V30 548 H  114.3953 24.1700 52.9891 0
M  V30 549 H  113.8861 25.2719 54.2439 0
M  V30 550 H  114.7426 23.8005 54.6647 0
M  V30 551 C  112.2740 22.6918 52.8556 0
M  V30 552 H  111.4326 23.1471 52.3324 0
M  V30 553 H  113.1013 22.6351 52.1516 0
M  V30 554 H  111.9951 21.6630 53.0835 0
M  V30 555 N  110.9054 24.3179 57.7977 0
M  V30 556 H  110.6563 23.3966 58.1288 0
M  V30 557 C  110.0419 25.4266 58.2201 0
M  V30 558 H  109.6670 25.9520 57.3407 0
M  V30 559 H  109.1746 25.0157 58.7367 0
M  V30 560 C  110.7469 26.4298 59.1565 0
M  V30 561 O  110.2655 27.5526 59.2979 0
M  V30 562 N  111.8854 26.0445 59.7615 0
M  V30 563 H  112.2229 25.1035 59.6120 0
M  V30 564 C  112.7501 26.9057 60.5725 0 CFG=2
M  V30 565 H  112.1572 27.7025 61.0255 0
M  V30 566 C  113.8676 27.5709 59.7414 0
M  V30 567 O  114.4690 28.5268 60.2293 0
M  V30 568 C  113.3789 26.0658 61.7063 0
M  V30 569 H  114.0247 25.2958 61.2829 0
M  V30 570 H  114.0309 26.7049 62.3041 0
M  V30 571 C  112.3518 25.4063 62.6435 0
M  V30 572 H  111.6998 26.1733 63.0633 0
M  V30 573 H  111.7084 24.7330 62.0757 0
M  V30 574 C  113.0175 24.6160 63.7792 0
M  V30 575 H  113.6723 23.8546 63.3523 0
M  V30 576 H  113.6587 25.2838 64.3563 0
M  V30 577 C  111.9941 23.9516 64.7105 0
M  V30 578 H  111.3346 24.7032 65.1458 0
M  V30 579 H  111.3669 23.2569 64.1504 0
M  V30 580 N  112.6576 23.2178 65.8016 0 CHG=1
M  V30 581 H  113.2507 22.4974 65.4151 0
M  V30 582 H  113.2178 23.8571 66.3473 0
M  V30 583 H  111.9596 22.7938 66.3962 0
M  V30 584 N  114.1423 27.0508 58.5311 0
M  V30 585 H  113.5732 26.2933 58.1796 0
M  V30 586 C  115.2465 27.4731 57.6626 0 CFG=2
M  V30 587 H  115.9802 28.0346 58.2444 0
M  V30 588 C  114.8118 28.4018 56.5154 0
M  V30 589 O  115.6875 29.0098 55.8992 0
M  V30 590 C  115.9615 26.2276 57.0943 0
M  V30 591 H  115.2465 25.5728 56.5955 0
M  V30 592 H  116.6783 26.5269 56.3295 0
M  V30 593 C  116.7294 25.4204 58.1121 0
M  V30 594 N  116.1236 24.5812 59.0310 0
M  V30 595 H  115.1319 24.4006 59.1292 0
M  V30 596 C  118.0813 25.3173 58.3573 0
M  V30 597 H  118.9039 25.8072 57.8574 0
M  V30 598 C  117.0903 24.0482 59.7801 0
M  V30 599 H  116.9022 23.3530 60.5852 0
M  V30 600 N  118.3056 24.4486 59.4276 0
M  V30 601 N  113.5003 28.4978 56.2322 0
M  V30 602 H  112.8278 27.9697 56.7691 0
M  V30 603 C  112.9627 29.3488 55.1683 0 CFG=2
M  V30 604 H  113.6383 29.2307 54.3226 0
M  V30 605 C  112.9224 30.8472 55.5387 0
M  V30 606 O  112.7576 31.1937 56.7089 0
M  V30 607 C  111.5339 28.9198 54.7259 0
M  V30 608 H  111.1468 29.6880 54.0533 0
M  V30 609 C  111.5540 27.6323 53.8874 0
M  V30 610 H  110.5604 27.3954 53.5124 0
M  V30 611 H  112.2049 27.7322 53.0210 0
M  V30 612 H  111.9042 26.7796 54.4624 0
M  V30 613 C  110.5218 28.8174 55.8818 0
M  V30 614 H  109.5376 28.5334 55.5118 0
M  V30 615 H  110.8239 28.0634 56.6068 0
M  V30 616 H  110.4099 29.7632 56.4114 0
M  V30 617 N  113.0571 31.6899 54.5024 0
M  V30 618 H  113.1655 31.2998 53.5747 0
M  V30 619 C  113.0132 33.1512 54.5607 0 CFG=2
M  V30 620 H  113.0369 33.4809 55.6011 0
M  V30 621 C  111.7146 33.6785 53.9125 0
M  V30 622 O  111.2022 33.0643 52.9763 0
M  V30 623 C  114.2485 33.7540 53.8212 0 CFG=2
M  V30 624 H  115.1481 33.4421 54.3520 0
M  V30 625 O  114.2443 35.1668 53.8403 0
M  V30 626 H  114.3551 35.4608 54.7560 0
M  V30 627 C  114.3881 33.3574 52.3394 0
M  V30 628 H  115.2858 33.7943 51.9012 0
M  V30 629 H  114.4723 32.2797 52.2293 0
M  V30 630 H  113.5408 33.6865 51.7387 0
M  V30 631 N  111.2190 34.8220 54.4116 0
M  V30 632 H  111.7064 35.2905 55.1689 0
M  V30 633 C  110.0942 35.5654 53.8349 0 CFG=2
M  V30 634 H  109.4184 34.8538 53.3558 0
M  V30 635 C  110.5862 36.5283 52.7293 0
M  V30 636 O  109.8064 36.8516 51.8343 0
M  V30 637 C  109.2997 36.2376 54.9973 0
M  V30 638 H  108.2424 35.9987 54.8751 0
M  V30 639 H  109.5626 35.7398 55.9323 0
M  V30 640 C  109.4595 37.7617 55.2383 0
M  V30 641 H  109.1811 37.9786 56.2704 0
M  V30 642 H  110.5042 38.0638 55.1500 0
M  V30 643 C  108.5560 38.6384 54.3602 0
M  V30 644 O  107.4107 38.2894 54.0810 0
M  V30 645 N  109.0585 39.7995 53.9393 0
M  V30 646 H  108.4998 40.4156 53.3688 0
M  V30 647 H  110.0037 40.0790 54.1923 0
M  V30 648 N  111.8587 36.9582 52.8044 0
M  V30 649 H  112.4372 36.6414 53.5716 0
M  V30 650 C  112.5139 37.8827 51.8756 0 CFG=2
M  V30 651 H  111.8617 38.7457 51.7278 0
M  V30 652 C  112.8072 37.2235 50.5122 0
M  V30 653 O  112.9362 36.0011 50.4417 0
M  V30 654 C  113.8462 38.3446 52.5050 0
M  V30 655 H  114.5583 37.5207 52.5632 0
M  V30 656 H  114.3112 39.1158 51.8899 0
M  V30 657 O  113.6696 38.8663 53.8063 0
M  V30 658 H  113.0691 39.6202 53.7837 0
M  V30 659 N  112.9701 38.0568 49.4701 0
M  V30 660 H  112.8768 39.0511 49.6176 0
M  V30 661 C  113.3980 37.6217 48.1360 0
M  V30 662 H  114.4004 38.0099 47.9535 0
M  V30 663 H  113.4663 36.5355 48.0554 0
M  V30 664 C  112.4700 38.1258 47.0207 0
M  V30 665 O  112.7223 37.8094 45.8595 0
M  V30 666 N  111.4187 38.9036 47.3363 0
M  V30 667 H  111.2353 39.1187 48.3055 0
M  V30 668 C  110.4668 39.4616 46.3643 0 CFG=2
M  V30 669 H  110.1202 38.6446 45.7289 0
M  V30 670 C  111.0408 40.5369 45.4153 0
M  V30 671 O  110.3677 40.8781 44.4421 0
M  V30 672 C  109.2539 40.0416 47.1212 0
M  V30 673 H  109.5929 40.8214 47.8059 0
M  V30 674 H  108.5785 40.5401 46.4239 0
M  V30 675 C  108.4242 39.0345 47.8978 0
M  V30 676 C  107.7284 38.0088 47.2226 0
M  V30 677 H  107.7826 37.9267 46.1466 0
M  V30 678 C  108.3472 39.1089 49.3052 0
M  V30 679 H  108.8832 39.8762 49.8447 0
M  V30 680 C  106.9542 37.1091 47.9430 0
M  V30 681 H  106.4101 36.3328 47.4262 0
M  V30 682 C  107.5585 38.2053 50.0038 0
M  V30 683 H  107.4890 38.2717 51.0801 0
M  V30 684 C  106.8589 37.2166 49.3248 0
M  V30 685 H  106.2425 36.5227 49.8768 0
M  V30 686 N  112.2378 41.0659 45.7217 0
M  V30 687 H  112.7464 40.7065 46.5160 0
M  V30 688 C  112.8483 42.2121 45.0461 0 CFG=2
M  V30 689 H  112.2074 42.5646 44.2389 0
M  V30 690 C  114.2072 41.8466 44.4295 0
M  V30 691 O  114.8292 40.8624 44.8330 0
M  V30 692 C  113.0281 43.3532 46.0745 0
M  V30 693 H  113.7933 43.0744 46.8016 0
M  V30 694 H  113.4078 44.2472 45.5767 0
M  V30 695 C  111.7678 43.7402 46.8330 0
M  V30 696 C  110.7146 44.3993 46.1671 0
M  V30 697 H  110.8003 44.6341 45.1198 0
M  V30 698 C  111.6363 43.4292 48.2032 0
M  V30 699 H  112.4324 42.9194 48.7260 0
M  V30 700 C  109.5424 44.7538 46.8611 0
M  V30 701 H  108.7463 45.2645 46.3392 0
M  V30 702 C  110.4620 43.7786 48.8985 0
M  V30 703 H  110.3668 43.5376 49.9473 0
M  V30 704 C  109.4157 44.4433 48.2289 0
M  V30 705 O  108.2819 44.7845 48.9065 0
M  V30 706 H  107.6416 45.2511 48.3647 0
M  V30 707 N  114.6549 42.6982 43.4903 0
M  V30 708 H  114.0706 43.4748 43.2186 0
M  V30 709 C  116.0177 42.7355 42.9561 0 CFG=2
M  V30 710 H  116.3128 41.7142 42.7048 0
M  V30 711 C  116.9603 43.2811 44.0480 0
M  V30 712 O  116.8357 44.4483 44.4182 0
M  V30 713 C  116.0573 43.5877 41.6581 0
M  V30 714 H  115.3986 43.1298 40.9199 0
M  V30 715 H  115.6537 44.5765 41.8805 0
M  V30 716 C  117.4333 43.7783 40.9976 0
M  V30 717 O  118.3858 43.0540 41.3621 0
M  V30 718 O  117.4950 44.6374 40.0925 0 CHG=-1
M  V30 719 N  117.8770 42.4289 44.5350 0
M  V30 720 H  117.9509 41.4949 44.1531 0
M  V30 721 C  118.8608 42.7619 45.5744 0 CFG=2
M  V30 722 H  118.3115 43.3225 46.3310 0
M  V30 723 C  119.9854 43.7032 45.0934 0
M  V30 724 O  120.5704 44.4006 45.9222 0
M  V30 725 C  119.4529 41.5255 46.3108 0
M  V30 726 H  120.3368 41.8180 46.8801 0
M  V30 727 H  118.7064 41.1951 47.0341 0
M  V30 728 C  119.8248 40.2991 45.4607 0
M  V30 729 O  119.8855 40.4180 44.2170 0
M  V30 730 O  120.0908 39.2538 46.0932 0 CHG=-1
M  V30 731 N  120.2583 43.7195 43.7777 0
M  V30 732 H  119.7198 43.1271 43.1573 0
M  V30 733 C  121.3031 44.5371 43.1617 0
M  V30 734 H  122.1823 44.5923 43.8058 0
M  V30 735 H  121.6184 44.0465 42.2407 0
M  V30 736 C  120.8258 45.9588 42.8182 0
M  V30 737 O  121.6452 46.7646 42.3783 0
M  V30 738 N  119.5285 46.2689 42.9945 0
M  V30 739 H  118.9060 45.5614 43.3584 0
M  V30 740 C  118.9098 47.5503 42.6457 0 CFG=2
M  V30 741 H  119.1731 47.7513 41.6054 0
M  V30 742 C  119.3842 48.7488 43.4891 0
M  V30 743 O  119.8231 48.5710 44.6252 0
M  V30 744 C  117.3811 47.4011 42.7160 0
M  V30 745 H  116.9384 48.2944 42.2880 0
M  V30 746 H  117.0360 46.5575 42.1197 0
M  V30 747 O  116.8896 47.2876 44.0358 0
M  V30 748 H  116.9547 46.3648 44.3064 0
M  V30 749 N  119.2240 49.9564 42.9169 0
M  V30 750 H  118.8387 50.0087 41.9849 0
M  V30 751 C  119.5111 51.2442 43.5575 0 CFG=2
M  V30 752 H  120.5478 51.2103 43.8966 0
M  V30 753 C  118.6265 51.5214 44.7895 0
M  V30 754 O  119.1088 52.1291 45.7446 0
M  V30 755 C  119.3897 52.3693 42.5051 0
M  V30 756 H  120.0323 52.1242 41.6580 0
M  V30 757 H  118.3724 52.3924 42.1118 0
M  V30 758 C  119.7780 53.7673 43.0287 0
M  V30 759 H  119.1400 54.0635 43.8614 0
M  V30 760 H  120.7968 53.7437 43.4139 0
M  V30 761 C  119.6576 54.8496 41.9585 0
M  V30 762 O  118.6402 55.5336 41.8791 0
M  V30 763 N  120.7013 55.0269 41.1473 0
M  V30 764 H  120.6709 55.7396 40.4328 0
M  V30 765 H  121.5270 54.4532 41.2400 0
M  V30 766 N  117.3660 51.0562 44.7543 0
M  V30 767 H  117.0305 50.5825 43.9259 0
M  V30 768 C  116.4238 51.1434 45.8691 0 CFG=2
M  V30 769 H  116.4472 52.1770 46.2143 0
M  V30 770 C  116.8024 50.2648 47.0745 0
M  V30 771 O  116.5754 50.6970 48.2046 0
M  V30 772 C  114.9991 50.8608 45.3628 0
M  V30 773 H  114.2714 51.0510 46.1528 0
M  V30 774 H  114.7521 51.5303 44.5404 0
M  V30 775 O  114.8445 49.5255 44.9289 0
M  V30 776 H  115.1676 49.4629 44.0240 0
M  V30 777 N  117.3923 49.0805 46.8254 0
M  V30 778 H  117.5246 48.7735 45.8709 0
M  V30 779 C  117.9140 48.2018 47.8738 0 CFG=2
M  V30 780 H  117.2084 48.2349 48.7051 0
M  V30 781 C  119.2692 48.6937 48.4233 0
M  V30 782 O  119.4880 48.5584 49.6241 0
M  V30 783 C  117.9961 46.7135 47.4229 0
M  V30 784 H  118.4739 46.6759 46.4423 0
M  V30 785 C  118.8094 45.7907 48.3589 0
M  V30 786 H  118.7110 44.7451 48.0720 0
M  V30 787 H  119.8754 46.0187 48.3339 0
M  V30 788 H  118.4689 45.8752 49.3914 0
M  V30 789 C  116.5775 46.1344 47.2633 0
M  V30 790 H  116.6053 45.0937 46.9426 0
M  V30 791 H  116.0298 46.1671 48.2055 0
M  V30 792 H  115.9949 46.6882 46.5276 0
M  V30 793 N  120.1165 49.3158 47.5812 0
M  V30 794 H  119.8872 49.3721 46.5976 0
M  V30 795 C  121.3407 50.0107 48.0072 0 CFG=2
M  V30 796 H  121.9546 49.2939 48.5563 0
M  V30 797 C  121.0535 51.1917 48.9529 0
M  V30 798 O  121.7337 51.3319 49.9681 0
M  V30 799 C  122.1406 50.4923 46.7810 0
M  V30 800 H  121.4839 51.0667 46.1281 0
M  V30 801 H  122.9184 51.1877 47.1023 0
M  V30 802 C  122.8052 49.3584 45.9792 0
M  V30 803 H  123.6067 48.9090 46.5660 0
M  V30 804 H  122.0910 48.5606 45.7796 0
M  V30 805 C  123.3876 49.8644 44.6567 0
M  V30 806 O  124.0080 50.9246 44.6074 0
M  V30 807 N  123.2088 49.1018 43.5770 0
M  V30 808 H  123.5864 49.3919 42.6873 0
M  V30 809 H  122.6877 48.2362 43.6301 0
M  V30 810 N  120.0132 51.9747 48.6197 0
M  V30 811 H  119.5290 51.7949 47.7498 0
M  V30 812 C  119.4667 53.0588 49.4326 0 CFG=2
M  V30 813 H  120.2837 53.7417 49.6736 0
M  V30 814 C  118.8543 52.5790 50.7632 0
M  V30 815 O  119.0103 53.2680 51.7713 0
M  V30 816 C  118.4329 53.8248 48.5907 0
M  V30 817 H  117.8683 54.5400 49.1873 0
M  V30 818 H  118.9166 54.3778 47.7847 0
M  V30 819 H  117.7112 53.1481 48.1350 0
M  V30 820 N  118.1998 51.4031 50.7532 0
M  V30 821 H  118.1049 50.8939 49.8855 0
M  V30 822 C  117.6095 50.7782 51.9406 0 CFG=2
M  V30 823 H  117.0604 51.5439 52.4933 0
M  V30 824 C  118.6750 50.2103 52.8937 0
M  V30 825 O  118.5567 50.4148 54.0981 0
M  V30 826 C  116.6098 49.6813 51.5294 0
M  V30 827 H  117.0682 48.9567 50.8584 0
M  V30 828 H  116.2701 49.1269 52.4058 0
M  V30 829 O  115.4700 50.2487 50.9159 0
M  V30 830 H  115.7085 50.5152 50.0222 0
M  V30 831 N  119.7114 49.5524 52.3430 0
M  V30 832 H  119.7281 49.4103 51.3406 0
M  V30 833 C  120.8654 49.0180 53.0763 0 CFG=2
M  V30 834 H  120.4724 48.3755 53.8670 0
M  V30 835 C  121.7009 50.1156 53.7675 0
M  V30 836 O  122.1918 49.8804 54.8704 0
M  V30 837 C  121.7659 48.1505 52.1403 0
M  V30 838 H  121.8322 48.6657 51.1805 0
M  V30 839 C  123.2210 47.9113 52.6042 0
M  V30 840 H  123.7341 47.2185 51.9367 0
M  V30 841 H  123.8085 48.8300 52.6059 0
M  V30 842 H  123.2536 47.4847 53.6074 0
M  V30 843 C  121.0987 46.7896 51.8679 0
M  V30 844 H  121.6441 46.2271 51.1096 0
M  V30 845 H  121.0646 46.1810 52.7719 0
M  V30 846 H  120.0742 46.9007 51.5148 0
M  V30 847 N  121.8052 51.2958 53.1338 0
M  V30 848 H  121.3974 51.4027 52.2148 0
M  V30 849 C  122.4191 52.4912 53.7099 0 CFG=2
M  V30 850 H  123.3696 52.2008 54.1615 0
M  V30 851 C  121.5604 53.1032 54.8295 0
M  V30 852 O  122.1109 53.4391 55.8741 0
M  V30 853 C  122.6892 53.5200 52.5905 0
M  V30 854 H  121.8014 53.5845 51.9600 0
M  V30 855 H  122.8217 54.5187 53.0111 0
M  V30 856 C  123.9276 53.1888 51.7296 0
M  V30 857 H  123.8517 52.1403 51.4396 0
M  V30 858 C  123.9339 53.9959 50.4191 0
M  V30 859 H  124.5212 53.4863 49.6547 0
M  V30 860 H  122.9299 54.1218 50.0143 0
M  V30 861 H  124.3593 54.9903 50.5581 0
M  V30 862 C  125.2465 53.3572 52.5121 0
M  V30 863 H  125.9434 54.0207 52.0020 0
M  V30 864 H  125.0866 53.7711 53.5084 0
M  V30 865 H  125.7484 52.3973 52.6359 0
M  V30 866 N  120.2386 53.2201 54.6168 0
M  V30 867 H  119.8493 52.9170 53.7338 0
M  V30 868 C  119.3195 53.8446 55.5704 0
M  V30 869 H  119.7007 54.8222 55.8651 0
M  V30 870 H  118.3611 54.0048 55.0786 0
M  V30 871 C  119.1119 52.9912 56.8294 0
M  V30 872 O  119.1060 53.5366 57.9310 0
M  V30 873 N  118.9866 51.6626 56.6751 0
M  V30 874 H  118.9873 51.2716 55.7406 0
M  V30 875 C  118.8162 50.6914 57.7656 0 CFG=2
M  V30 876 H  118.1570 51.1605 58.4945 0
M  V30 877 C  120.1170 50.3712 58.5369 0
M  V30 878 O  120.0646 49.5671 59.4676 0
M  V30 879 C  118.1004 49.3897 57.3169 0
M  V30 880 H  118.7643 48.8566 56.6343 0
M  V30 881 H  117.9222 48.7436 58.1770 0
M  V30 882 C  116.7538 49.5839 56.6055 0
M  V30 883 O  116.1176 50.6431 56.8076 0
M  V30 884 O  116.3374 48.6151 55.9325 0 CHG=-1
M  V30 885 N  121.2405 51.0084 58.1646 0
M  V30 886 H  121.1959 51.6495 57.3853 0
M  V30 887 C  122.5572 50.8431 58.7804 0 CFG=2
M  V30 888 H  122.5178 50.0819 59.5619 0
M  V30 889 C  123.0263 52.1490 59.4402 0
M  V30 890 O  123.4118 52.1281 60.6075 0
M  V30 891 C  123.5339 50.3515 57.6925 0
M  V30 892 H  123.1565 49.3996 57.3152 0
M  V30 893 H  123.5085 51.0503 56.8542 0
M  V30 894 C  124.9995 50.1613 58.1406 0
M  V30 895 H  125.4274 51.1116 58.4610 0
M  V30 896 H  125.0343 49.4969 59.0047 0
M  V30 897 C  125.9229 49.5858 57.0572 0
M  V30 898 O  127.0822 49.2959 57.3403 0
M  V30 899 N  125.4428 49.4156 55.8209 0
M  V30 900 H  126.0390 49.0428 55.0968 0
M  V30 901 H  124.4838 49.6506 55.6043 0
M  V30 902 N  122.9991 53.2550 58.6794 0
M  V30 903 H  122.6807 53.1909 57.7206 0
M  V30 904 C  123.4649 54.5799 59.0981 0 CFG=2
M  V30 905 H  124.4298 54.4730 59.5935 0
M  V30 906 C  122.4890 55.2357 60.0910 0
M  V30 907 O  122.9341 55.7657 61.1077 0
M  V30 908 C  123.6517 55.5145 57.8696 0
M  V30 909 H  122.7007 55.5565 57.3373 0
M  V30 910 C  124.0372 56.9702 58.2114 0
M  V30 911 H  124.2046 57.5497 57.3038 0
M  V30 912 H  123.2609 57.4900 58.7720 0
M  V30 913 H  124.9542 57.0089 58.7985 0
M  V30 914 C  124.6857 54.9327 56.8887 0
M  V30 915 H  124.6237 55.4490 55.9333 0
M  V30 916 H  125.7002 55.0283 57.2732 0
M  V30 917 H  124.5263 53.8767 56.6757 0
M  V30 918 N  121.1846 55.1451 59.7889 0
M  V30 919 H  120.9046 54.6881 58.9322 0
M  V30 920 C  120.0951 55.6227 60.6393 0 CFG=2
M  V30 921 H  120.4844 56.2965 61.4050 0
M  V30 922 C  119.4048 54.4660 61.3796 0
M  V30 923 O  118.5972 54.7416 62.2596 0
M  V30 924 C  119.0845 56.4192 59.7866 0
M  V30 925 H  118.6950 55.8035 58.9782 0
M  V30 926 H  118.2169 56.6872 60.3910 0
M  V30 927 C  119.6407 57.6989 59.1901 0
M  V30 928 C  120.3796 57.6618 57.9895 0
M  V30 929 H  120.5505 56.7234 57.4831 0
M  V30 930 C  119.4320 58.9314 59.8424 0
M  V30 931 H  118.8680 58.9697 60.7625 0
M  V30 932 C  120.9193 58.8471 57.4576 0
M  V30 933 H  121.5117 58.8141 56.5565 0
M  V30 934 C  119.9456 60.1219 59.2916 0
M  V30 935 H  119.7680 61.0638 59.7896 0
M  V30 936 C  120.6865 60.0787 58.0953 0
M  V30 937 O  121.1816 61.2220 57.5444 0
M  V30 938 H  121.0447 62.0142 58.0820 0
M  V30 939 N  119.7265 53.2022 61.0545 0
M  V30 940 H  120.3969 53.0397 60.3172 0
M  V30 941 C  119.1566 52.0229 61.7048 0
M  V30 942 H  119.8178 51.1740 61.5342 0
M  V30 943 H  119.1054 52.1735 62.7835 0
M  V30 944 C  117.7433 51.7203 61.1874 0
M  V30 945 O  117.0308 52.6045 60.7081 0
M  V30 946 N  117.3353 50.4474 61.3119 0
M  V30 947 H  117.9704 49.7601 61.6901 0
M  V30 948 C  116.0063 49.9569 60.9421 0 CFG=2
M  V30 949 H  115.8384 50.2382 59.8998 0
M  V30 950 C  114.9032 50.5912 61.8085 0
M  V30 951 O  115.0103 50.5675 63.0353 0
M  V30 952 C  116.0128 48.4117 61.0160 0
M  V30 953 H  116.7244 48.0548 60.2708 0
M  V30 954 H  116.3987 48.0807 61.9808 0
M  V30 955 C  114.6425 47.7403 60.7766 0
M  V30 956 H  114.0218 48.0032 61.6335 0
M  V30 957 H  114.1186 48.1436 59.9106 0
M  V30 958 C  114.6843 46.2008 60.7455 0
M  V30 959 H  114.7491 45.7690 61.7445 0
M  V30 960 H  113.7351 45.8609 60.3302 0
M  V30 961 N  115.6813 45.6450 59.8143 0
M  V30 962 H  116.2819 44.9283 60.2059 0
M  V30 963 C  115.8809 45.9523 58.5203 0
M  V30 964 N  116.8930 45.3670 57.8699 0
M  V30 965 H  117.0677 45.5831 56.8986 0
M  V30 966 H  117.4799 44.6931 58.3438 0
M  V30 967 N  115.1043 46.8232 57.8635 0 CHG=1
M  V30 968 H  115.3536 47.1363 56.9301 0
M  V30 969 H  114.3140 47.2461 58.3254 0
M  V30 970 N  113.8570 51.1124 61.1448 0
M  V30 971 H  113.8469 51.0911 60.1355 0
M  V30 972 C  112.6415 51.6230 61.7814 0 CFG=2
M  V30 973 H  112.9546 52.2738 62.6013 0
M  V30 974 C  111.8287 50.4470 62.3581 0
M  V30 975 O  111.6482 49.4359 61.6764 0
M  V30 976 C  111.8047 52.4670 60.7865 0
M  V30 977 H  112.4380 53.2416 60.3528 0
M  V30 978 H  111.4768 51.8178 59.9731 0
M  V30 979 C  110.5611 53.1527 61.3771 0
M  V30 980 O  110.4893 53.3060 62.6176 0
M  V30 981 O  109.7083 53.5602 60.5610 0 CHG=-1
M  V30 982 N  111.3632 50.6190 63.6038 0
M  V30 983 H  111.5373 51.4953 64.0756 0
M  V30 984 C  110.5820 49.6292 64.3428 0 CFG=2
M  V30 985 H  110.3072 48.8201 63.6714 0
M  V30 986 C  109.2335 50.1820 64.8402 0
M  V30 987 O  108.5030 49.4417 65.4987 0
M  V30 988 C  111.4376 49.0264 65.4799 0
M  V30 989 H  111.6768 49.7903 66.2210 0
M  V30 990 H  110.8413 48.2740 65.9975 0
M  V30 991 C  112.7344 48.3494 64.9923 0
M  V30 992 H  112.5578 47.6553 64.1709 0
M  V30 993 H  113.3682 49.1366 64.5876 0
M  V30 994 C  113.5063 47.6648 66.1275 0
M  V30 995 H  114.0556 48.4161 66.6955 0
M  V30 996 H  112.8247 47.1917 66.8315 0
M  V30 997 N  114.5303 46.7356 65.6228 0
M  V30 998 H  114.3009 45.7547 65.7147 0
M  V30 999 C  115.6927 47.0558 65.0264 0
M  V30 1000 N  116.5034 46.0766 64.6077 0
M  V30 1001 H  117.3950 46.2858 64.1832 0
M  V30 1002 H  116.2298 45.1049 64.7156 0
M  V30 1003 N  116.0648 48.3298 64.8427 0 CHG=1
M  V30 1004 H  116.9437 48.5503 64.3991 0
M  V30 1005 H  115.4457 49.0813 65.1111 0
M  V30 1006 N  108.8952 51.4385 64.4924 0
M  V30 1007 H  109.5280 51.9927 63.9278 0
M  V30 1008 C  107.6163 52.0746 64.8291 0 CFG=2
M  V30 1009 H  107.4423 51.8653 65.8841 0
M  V30 1010 C  106.4060 51.5195 64.0439 0
M  V30 1011 O  105.2745 51.6541 64.5126 0
M  V30 1012 C  107.7535 53.6067 64.6912 0
M  V30 1013 H  106.9092 54.0958 65.1790 0
M  V30 1014 H  108.6512 53.9613 65.1990 0
M  V30 1015 O  107.7814 54.0391 63.3438 0
M  V30 1016 H  108.6519 53.8475 62.9720 0
M  V30 1017 N  106.6652 50.9031 62.8780 0
M  V30 1018 H  107.6219 50.8538 62.5586 0
M  V30 1019 C  105.6467 50.3326 61.9996 0
M  V30 1020 H  104.7261 50.9178 62.0362 0
M  V30 1021 H  106.0109 50.3896 60.9738 0
M  V30 1022 C  105.3323 48.8628 62.3239 0
M  V30 1023 O  104.4587 48.3028 61.6649 0
M  V30 1024 N  106.0250 48.2342 63.2964 0
M  V30 1025 H  106.7181 48.7553 63.8153 0
M  V30 1026 C  105.8552 46.8284 63.6879 0 CFG=2
M  V30 1027 H  106.0118 46.2168 62.7990 0
M  V30 1028 C  104.4314 46.5168 64.1788 0
M  V30 1029 O  103.6609 45.9065 63.4370 0
M  V30 1030 C  106.9078 46.4257 64.7465 0
M  V30 1031 H  106.8954 47.1294 65.5801 0
M  V30 1032 H  106.6379 45.4565 65.1657 0
M  V30 1033 C  108.3362 46.2934 64.2803 0
M  V30 1034 N  109.3385 45.8158 65.1303 0
M  V30 1035 C  108.8941 46.5570 63.0452 0
M  V30 1036 H  108.4608 46.9362 62.1314 0
M  V30 1037 C  110.4366 45.7926 64.3903 0
M  V30 1038 H  111.3948 45.4609 64.7628 0
M  V30 1039 N  110.2328 46.2215 63.1442 0
M  V30 1040 N  104.1255 46.9440 65.4136 0
M  V30 1041 H  104.8256 47.4281 65.9581 0
M  V30 1042 C  102.8034 46.8615 66.0249 0 CFG=2
M  V30 1043 H  102.0852 46.5534 65.2676 0
M  V30 1044 C  102.3930 48.2596 66.5069 0
M  V30 1045 O  103.2222 48.9936 67.0443 0
M  V30 1046 C  102.7459 45.8392 67.2199 0 CFG=2
M  V30 1047 H  103.7037 45.8684 67.7395 0
M  V30 1048 C  102.5357 44.3951 66.7129 0
M  V30 1049 H  102.1025 43.7825 67.5044 0
M  V30 1050 H  101.7952 44.3822 65.9161 0
M  V30 1051 C  101.6505 46.1112 68.2811 0
M  V30 1052 H  101.6457 45.3421 69.0531 0
M  V30 1053 H  101.7888 47.0557 68.8074 0
M  V30 1054 H  100.6644 46.1216 67.8175 0
M  V30 1055 C  103.8130 43.6803 66.2745 0
M  V30 1056 H  103.5957 42.9497 65.4985 0
M  V30 1057 H  104.5669 44.3589 65.8883 0
M  V30 1058 H  104.2531 43.1511 67.1182 0
M  V30 1059 N  101.0904 48.5394 66.3742 0
M  V30 1060 H  100.5010 47.8799 65.8802 0
M  V30 1061 C  100.3701 49.5656 67.1126 0 CFG=2
M  V30 1062 H  101.0332 50.0218 67.8486 0
M  V30 1063 C  99.2260 48.8681 67.8731 0
M  V30 1064 O  98.3580 48.2402 67.2650 0
M  V30 1065 C  99.8264 50.6937 66.1917 0
M  V30 1066 H  99.1783 51.3254 66.8003 0
M  V30 1067 C  100.9733 51.5931 65.6977 0
M  V30 1068 H  100.5925 52.4365 65.1217 0
M  V30 1069 H  101.5458 52.0001 66.5316 0
M  V30 1070 H  101.6657 51.0434 65.0594 0
M  V30 1071 C  98.9680 50.2235 65.0017 0
M  V30 1072 H  98.6604 51.0678 64.3921 0
M  V30 1073 H  99.5227 49.5496 64.3505 0
M  V30 1074 H  98.0532 49.7267 65.3155 0
M  V30 1075 N  99.2945 48.9442 69.2106 0
M  V30 1076 H  100.0443 49.4738 69.6372 0
M  V30 1077 C  98.3315 48.3552 70.1361 0 CFG=2
M  V30 1078 H  97.8799 47.4622 69.6997 0
M  V30 1079 C  97.2248 49.3753 70.4113 0
M  V30 1080 O  97.3882 50.2344 71.2770 0
M  V30 1081 C  99.0699 47.9376 71.4169 0
M  V30 1082 H  98.3762 47.6225 72.1964 0
M  V30 1083 H  99.7351 47.0993 71.2134 0
M  V30 1084 H  99.6742 48.7506 71.8200 0
M  V30 1085 N  96.1463 49.2835 69.6196 0
M  V30 1086 H  96.0919 48.5410 68.9340 0
M  V30 1087 C  95.0441 50.2395 69.6037 0 CFG=2
M  V30 1088 H  95.4365 51.2417 69.7822 0
M  V30 1089 C  94.0381 49.8839 70.7112 0
M  V30 1090 O  93.2739 48.9296 70.5686 0
M  V30 1091 C  94.3180 50.2454 68.2257 0 CFG=2
M  V30 1092 H  93.9404 49.2374 68.0562 0
M  V30 1093 C  95.2834 50.5603 67.0580 0
M  V30 1094 H  95.3201 51.6344 66.8781 0
M  V30 1095 H  96.3085 50.2842 67.3015 0
M  V30 1096 C  93.0941 51.1895 68.1638 0
M  V30 1097 H  92.6480 51.1922 67.1692 0
M  V30 1098 H  92.3052 50.8981 68.8573 0
M  V30 1099 H  93.3780 52.2159 68.3992 0
M  V30 1100 C  94.9162 49.8113 65.7713 0
M  V30 1101 H  95.4973 50.1837 64.9293 0
M  V30 1102 H  95.1267 48.7461 65.8681 0
M  V30 1103 H  93.8599 49.9183 65.5259 0
M  V30 1104 N  94.0696 50.6755 71.7908 0
M  V30 1105 H  94.7238 51.4461 71.8102 0
M  V30 1106 C  93.1253 50.6318 72.9029 0 CFG=2
M  V30 1107 H  92.9962 49.5974 73.2270 0
M  V30 1108 C  91.7623 51.2040 72.4853 0
M  V30 1109 O  91.7105 52.1716 71.7241 0
M  V30 1110 C  93.6805 51.4667 74.0751 0
M  V30 1111 H  93.8054 52.4990 73.7535 0
M  V30 1112 H  92.9400 51.4935 74.8742 0
M  V30 1113 C  94.9963 50.9936 74.6687 0
M  V30 1114 C  96.2208 51.4279 74.1209 0
M  V30 1115 H  96.2295 52.1659 73.3351 0
M  V30 1116 C  95.0125 49.9968 75.6654 0
M  V30 1117 H  94.0878 49.6177 76.0677 0
M  V30 1118 C  97.4176 50.9027 74.5863 0
M  V30 1119 H  98.3500 51.2412 74.1628 0
M  V30 1120 C  96.2188 49.4866 76.1238 0
M  V30 1121 H  96.2247 48.7219 76.8862 0
M  V30 1122 C  97.4152 49.9344 75.5814 0
M  V30 1123 H  98.3459 49.5158 75.9276 0
M  V30 1124 N  90.6984 50.6212 73.0504 0
M  V30 1125 H  90.8379 49.8414 73.6789 0
M  V30 1126 C  89.3318 51.1253 72.9847 0 CFG=2
M  V30 1127 H  89.3121 52.1321 72.5627 0
M  V30 1128 C  88.8367 51.1856 74.4335 0
M  V30 1129 O  88.7549 50.1385 75.0726 0
M  V30 1130 C  88.4870 50.1990 72.0810 0
M  V30 1131 H  88.9322 50.1906 71.0853 0
M  V30 1132 H  88.5553 49.1720 72.4404 0
M  V30 1133 C  86.9999 50.5964 71.9780 0
M  V30 1134 H  86.5376 50.5959 72.9660 0
M  V30 1135 H  86.9132 51.6147 71.5977 0
M  V30 1136 C  86.2098 49.6663 71.0527 0
M  V30 1137 O  86.5892 49.4444 69.9039 0
M  V30 1138 N  85.0855 49.1378 71.5390 0
M  V30 1139 H  84.5226 48.5260 70.9667 0
M  V30 1140 H  84.7921 49.3409 72.4836 0
M  V30 1141 N  88.5597 52.4058 74.9250 0
M  V30 1142 H  88.6366 53.2059 74.3100 0
M  V30 1143 C  88.2191 52.7167 76.3175 0 CFG=2
M  V30 1144 H  89.1041 52.4929 76.9102 0
M  V30 1145 C  86.9718 51.9383 76.8140 0
M  V30 1146 O  85.8676 52.2409 76.3576 0
M  V30 1147 C  88.0085 54.2332 76.4162 0
M  V30 1148 H  87.8428 54.5300 77.4506 0
M  V30 1149 H  88.8872 54.7741 76.0691 0
M  V30 1150 H  87.1603 54.5699 75.8189 0
M  V30 1151 N  87.1682 50.9088 77.6742 0
M  V30 1152 C  86.1176 49.9225 77.9868 0 CFG=2
M  V30 1153 H  85.6185 49.5990 77.0710 0
M  V30 1154 C  85.0619 50.4436 78.9778 0
M  V30 1155 O  85.3917 51.2290 79.8636 0
M  V30 1156 C  86.9153 48.7482 78.5777 0
M  V30 1157 H  86.3363 48.1188 79.2552 0
M  V30 1158 H  87.2713 48.1097 77.7677 0
M  V30 1159 C  88.1019 49.4000 79.2672 0
M  V30 1160 H  87.7974 49.7750 80.2450 0
M  V30 1161 H  88.9443 48.7234 79.4151 0
M  V30 1162 C  88.4261 50.5716 78.3489 0
M  V30 1163 H  88.8202 51.4152 78.9167 0
M  V30 1164 H  89.1745 50.2671 77.6168 0
M  V30 1165 N  83.8164 49.9629 78.8196 0
M  V30 1166 H  83.6409 49.3202 78.0609 0
M  V30 1167 C  82.6763 50.1952 79.7182 0 CFG=2
M  V30 1168 H  81.8372 49.6603 79.2724 0
M  V30 1169 C  82.2265 51.6694 79.8173 0
M  V30 1170 O  81.8251 52.1146 80.8930 0
M  V30 1171 C  82.9429 49.5550 81.0986 0
M  V30 1172 H  82.0482 49.5702 81.7221 0
M  V30 1173 H  83.2433 48.5120 80.9943 0
M  V30 1174 H  83.7320 50.0733 81.6449 0
M  V30 1175 N  82.2841 52.3945 78.6868 0
M  V30 1176 H  82.6392 51.9638 77.8453 0
M  V30 1177 C  81.8267 53.7822 78.5779 0
M  V30 1178 H  81.6032 53.9883 77.5311 0
M  V30 1179 H  80.8957 53.9224 79.1298 0
M  V30 1180 C  82.8683 54.8059 79.0619 0
M  V30 1181 O  82.5347 55.9862 79.1612 0
M  V30 1182 N  84.1096 54.3773 79.3547 0
M  V30 1183 H  84.3219 53.3937 79.2648 0
M  V30 1184 C  85.2316 55.2381 79.7390 0 CFG=2
M  V30 1185 H  84.8922 55.9042 80.5347 0
M  V30 1186 C  85.7525 56.1116 78.5832 0
M  V30 1187 O  85.4170 55.8834 77.4200 0
M  V30 1188 C  86.3752 54.3521 80.2803 0
M  V30 1189 H  86.6108 53.5670 79.5606 0
M  V30 1190 H  87.2890 54.9407 80.3776 0
M  V30 1191 C  86.0921 53.7507 81.6643 0
M  V30 1192 H  85.9183 54.5628 82.3706 0
M  V30 1193 H  85.1744 53.1625 81.6433 0
M  V30 1194 C  87.2629 52.8780 82.1437 0
M  V30 1195 H  87.4180 52.0601 81.4398 0
M  V30 1196 H  88.1801 53.4650 82.1121 0
M  V30 1197 C  87.0728 52.2920 83.5495 0
M  V30 1198 H  86.1746 51.6752 83.5910 0
M  V30 1199 H  87.9176 51.6465 83.7916 0
M  V30 1200 N  86.9895 53.3478 84.5731 0 CHG=1
M  V30 1201 H  86.1676 53.9111 84.4120 0
M  V30 1202 H  86.9463 52.9375 85.4943 0
M  V30 1203 H  87.8113 53.9436 84.5011 0
M  V30 1204 N  86.6208 57.0641 78.9497 0
M  V30 1205 H  86.8255 57.1964 79.9297 0
M  V30 1206 C  87.4987 57.7986 78.0433 0 CFG=2
M  V30 1207 H  87.3905 57.4121 77.0293 0
M  V30 1208 C  88.9590 57.5738 78.4910 0
M  V30 1209 O  89.2177 57.3234 79.6693 0
M  V30 1210 C  87.1736 59.3154 78.0524 0 CFG=2
M  V30 1211 H  87.9020 59.8248 77.4226 0
M  V30 1212 O  87.2909 59.8929 79.3397 0
M  V30 1213 H  88.2151 60.1348 79.4844 0
M  V30 1214 C  85.7773 59.6326 77.4977 0
M  V30 1215 H  85.6019 60.7084 77.4703 0
M  V30 1216 H  85.6703 59.2572 76.4794 0
M  V30 1217 H  84.9904 59.1830 78.1039 0
M  V30 1218 N  89.8803 57.6215 77.5149 0
M  V30 1219 H  89.5757 57.8485 76.5761 0
M  V30 1220 C  91.2831 57.2017 77.6298 0 CFG=2
M  V30 1221 H  91.2703 56.1795 78.0115 0
M  V30 1222 C  92.1645 58.0224 78.5972 0
M  V30 1223 O  93.2056 57.5177 79.0159 0
M  V30 1224 C  91.9783 57.1913 76.2398 0
M  V30 1225 H  92.9980 56.8323 76.3852 0
M  V30 1226 C  91.3226 56.1724 75.2927 0
M  V30 1227 H  91.8203 56.1610 74.3270 0
M  V30 1228 H  91.3747 55.1632 75.7023 0
M  V30 1229 H  90.2761 56.4003 75.1040 0
M  V30 1230 C  92.1102 58.5775 75.5732 0
M  V30 1231 H  92.5431 58.4944 74.5770 0
M  V30 1232 H  91.1439 59.0655 75.4651 0
M  V30 1233 H  92.7542 59.2465 76.1440 0
M  V30 1234 N  91.7338 59.2435 78.9542 0
M  V30 1235 H  90.8566 59.5925 78.5902 0
M  V30 1236 C  92.3969 60.1257 79.9222 0 CFG=2
M  V30 1237 H  93.4713 60.0173 79.7613 0
M  V30 1238 C  92.1605 59.7194 81.3960 0
M  V30 1239 O  92.8018 60.3064 82.2677 0
M  V30 1240 C  92.0866 61.6344 79.7073 0
M  V30 1241 H  92.5136 62.2142 80.5268 0
M  V30 1242 H  92.5993 61.9558 78.8002 0
M  V30 1243 C  90.6142 62.0446 79.5568 0
M  V30 1244 O  89.7560 61.1755 79.2899 0
M  V30 1245 O  90.3720 63.2670 79.6499 0 CHG=-1
M  V30 1246 N  91.2787 58.7305 81.6533 0
M  V30 1247 H  90.7859 58.3119 80.8759 0
M  V30 1248 C  90.9877 58.1435 82.9684 0 CFG=2
M  V30 1249 H  90.5372 58.9443 83.5507 0
M  V30 1250 C  92.2837 57.5960 83.6209 0
M  V30 1251 O  92.8540 56.6535 83.0674 0
M  V30 1252 C  89.9241 57.0194 82.8275 0
M  V30 1253 H  89.0009 57.4435 82.4318 0
M  V30 1254 H  90.2824 56.2924 82.0972 0
M  V30 1255 C  89.5736 56.2652 84.1226 0
M  V30 1256 O  89.7480 56.8413 85.2183 0
M  V30 1257 O  89.0885 55.1210 83.9956 0 CHG=-1
M  V30 1258 N  92.7287 58.1794 84.7617 0
M  V30 1259 C  93.9654 57.7419 85.4313 0 CFG=2
M  V30 1260 H  94.7878 57.7376 84.7152 0
M  V30 1261 C  93.8896 56.3426 86.0725 0
M  V30 1262 O  94.9347 55.7103 86.2086 0
M  V30 1263 C  94.2292 58.8418 86.4705 0
M  V30 1264 H  94.7769 58.4972 87.3491 0
M  V30 1265 H  94.8190 59.6366 86.0116 0
M  V30 1266 C  92.8484 59.3690 86.8193 0
M  V30 1267 H  92.3785 58.7009 87.5426 0
M  V30 1268 H  92.8602 60.3716 87.2475 0
M  V30 1269 C  92.1020 59.2865 85.4925 0
M  V30 1270 H  91.0368 59.1400 85.6711 0
M  V30 1271 H  92.2340 60.2071 84.9229 0
M  V30 1272 N  92.6773 55.8753 86.4267 0
M  V30 1273 H  91.8557 56.4440 86.2670 0
M  V30 1274 C  92.4377 54.5450 86.9895 0 CFG=2
M  V30 1275 H  93.1502 54.3907 87.8024 0
M  V30 1276 C  92.6494 53.4260 85.9570 0
M  V30 1277 O  93.3516 52.4594 86.2561 0
M  V30 1278 C  91.0235 54.4876 87.5863 0
M  V30 1279 H  90.8320 53.5206 88.0526 0
M  V30 1280 H  90.8915 55.2518 88.3528 0
M  V30 1281 H  90.2575 54.6463 86.8264 0
M  V30 1282 N  92.0753 53.6044 84.7536 0
M  V30 1283 H  91.5007 54.4204 84.5932 0
M  V30 1284 C  92.2678 52.7162 83.6077 0 CFG=2
M  V30 1285 H  92.1090 51.6899 83.9456 0
M  V30 1286 C  93.6961 52.7718 83.0398 0
M  V30 1287 O  94.2466 51.7172 82.7265 0
M  V30 1288 C  91.2045 53.0126 82.5309 0
M  V30 1289 H  90.2199 52.7669 82.9267 0
M  V30 1290 H  91.1893 54.0818 82.3180 0
M  V30 1291 C  91.3773 52.3036 81.2188 0
M  V30 1292 C  91.0192 51.0245 80.9648 0
M  V30 1293 H  90.5204 50.3757 81.6697 0
M  V30 1294 C  92.0601 52.7770 80.0162 0
M  V30 1295 N  91.4284 50.6768 79.6947 0
M  V30 1296 H  91.3042 49.7447 79.3032 0
M  V30 1297 C  92.6978 53.9843 79.6408 0
M  V30 1298 H  92.7248 54.8093 80.3374 0
M  V30 1299 C  92.0670 51.7189 79.0592 0
M  V30 1300 C  93.3114 54.1247 78.3789 0
M  V30 1301 H  93.8030 55.0507 78.1201 0
M  V30 1302 C  92.6579 51.8537 77.7930 0
M  V30 1303 H  92.6346 51.0272 77.1009 0
M  V30 1304 C  93.2881 53.0645 77.4530 0
M  V30 1305 H  93.7608 53.1795 76.4894 0
M  V30 1306 N  94.2646 53.9864 82.9276 0
M  V30 1307 H  93.7407 54.8095 83.1944 0
M  V30 1308 C  95.6145 54.2190 82.4085 0 CFG=2
M  V30 1309 H  95.6699 53.7718 81.4139 0
M  V30 1310 C  96.7021 53.5492 83.2621 0
M  V30 1311 O  97.5890 52.9185 82.6941 0
M  V30 1312 C  95.8878 55.7276 82.2672 0
M  V30 1313 H  95.5942 56.2690 83.1651 0
M  V30 1314 H  96.9527 55.9147 82.1207 0
M  V30 1315 O  95.2162 56.2535 81.1419 0
M  V30 1316 H  94.2855 56.3579 81.3599 0
M  V30 1317 N  96.5795 53.6505 84.5987 0
M  V30 1318 H  95.8162 54.1884 84.9874 0
M  V30 1319 C  97.4656 53.0089 85.5729 0 CFG=2
M  V30 1320 H  98.4839 53.3175 85.3291 0
M  V30 1321 C  97.4279 51.4700 85.5144 0
M  V30 1322 O  98.4705 50.8495 85.7078 0
M  V30 1323 C  97.1400 53.5513 86.9819 0
M  V30 1324 H  97.2666 54.6345 86.9687 0
M  V30 1325 H  96.0881 53.3699 87.2096 0
M  V30 1326 C  98.0039 52.9794 88.1217 0
M  V30 1327 H  97.8198 51.9101 88.2323 0
M  V30 1328 H  99.0590 53.0848 87.8653 0
M  V30 1329 C  97.7282 53.6667 89.4660 0
M  V30 1330 H  97.9159 54.7370 89.3697 0
M  V30 1331 H  96.6710 53.5619 89.7143 0
M  V30 1332 C  98.5857 53.0936 90.6022 0
M  V30 1333 H  98.3912 52.0273 90.7236 0
M  V30 1334 H  99.6455 53.2039 90.3695 0
M  V30 1335 N  98.3078 53.7750 91.8777 0 CHG=1
M  V30 1336 H  97.3346 53.6552 92.1199 0
M  V30 1337 H  98.8861 53.3786 92.6049 0
M  V30 1338 H  98.5125 54.7599 91.7858 0
M  V30 1339 N  96.2498 50.8891 85.2278 0
M  V30 1340 H  95.4346 51.4658 85.0731 0
M  V30 1341 C  96.0615 49.4468 85.0819 0 CFG=2
M  V30 1342 H  96.5281 48.9796 85.9516 0
M  V30 1343 C  96.7630 48.8840 83.8330 0
M  V30 1344 O  97.5797 47.9736 83.9698 0
M  V30 1345 C  94.5496 49.1178 85.1353 0
M  V30 1346 H  94.1541 49.4368 86.1002 0
M  V30 1347 H  94.0222 49.7230 84.3983 0
M  V30 1348 C  94.1583 47.6429 84.8886 0
M  V30 1349 H  93.0797 47.5444 85.0161 0
M  V30 1350 H  94.3452 47.3862 83.8447 0
M  V30 1351 C  94.8609 46.6074 85.7869 0
M  V30 1352 H  94.4993 45.6159 85.5108 0
M  V30 1353 H  95.9291 46.5929 85.5719 0
M  V30 1354 C  94.6368 46.8215 87.2907 0
M  V30 1355 H  94.9986 47.8012 87.6027 0
M  V30 1356 H  93.5729 46.7780 87.5262 0
M  V30 1357 N  95.3456 45.7999 88.0788 0 CHG=1
M  V30 1358 H  96.3362 45.8597 87.8893 0
M  V30 1359 H  95.1817 45.9561 89.0629 0
M  V30 1360 H  95.0096 44.8829 87.8214 0
M  V30 1361 N  96.4303 49.4270 82.6493 0
M  V30 1362 H  95.7638 50.1870 82.6109 0
M  V30 1363 C  96.8789 48.8851 81.3644 0 CFG=2
M  V30 1364 H  96.7225 47.8047 81.4057 0
M  V30 1365 C  98.3771 49.0929 81.0602 0
M  V30 1366 O  98.9276 48.2746 80.3276 0
M  V30 1367 C  96.0472 49.4188 80.1669 0
M  V30 1368 H  96.4050 48.8997 79.2764 0
M  V30 1369 C  94.5646 49.0350 80.2903 0
M  V30 1370 H  94.0203 49.2899 79.3812 0
M  V30 1371 H  94.4502 47.9637 80.4533 0
M  V30 1372 H  94.0793 49.5484 81.1201 0
M  V30 1373 C  96.2098 50.9224 79.8844 0
M  V30 1374 H  95.5812 51.2347 79.0498 0
M  V30 1375 H  95.9328 51.5225 80.7481 0
M  V30 1376 H  97.2373 51.1711 79.6253 0
M  V30 1377 N  99.0304 50.1220 81.6353 0
M  V30 1378 H  98.5355 50.7798 82.2224 0
M  V30 1379 C  100.4806 50.3146 81.4884 0 CFG=2
M  V30 1380 H  100.7205 50.1757 80.4338 0
M  V30 1381 C  101.3143 49.2809 82.2694 0
M  V30 1382 O  102.3988 48.9372 81.8032 0
M  V30 1383 C  100.9655 51.7351 81.8770 0
M  V30 1384 H  102.0450 51.7618 81.7181 0
M  V30 1385 C  100.4027 52.7939 80.9159 0
M  V30 1386 H  100.7631 53.7924 81.1642 0
M  V30 1387 H  100.7075 52.5774 79.8928 0
M  V30 1388 H  99.3157 52.8193 80.9180 0
M  V30 1389 C  100.7629 52.1107 83.3573 0
M  V30 1390 H  101.0261 53.1522 83.5419 0
M  V30 1391 H  99.7298 51.9719 83.6616 0
M  V30 1392 H  101.3803 51.5031 84.0193 0
M  V30 1393 N  100.7779 48.7555 83.3873 0
M  V30 1394 H  99.8866 49.0946 83.7224 0
M  V30 1395 C  101.3522 47.6191 84.1193 0 CFG=2
M  V30 1396 H  102.4114 47.8411 84.2655 0
M  V30 1397 C  101.2852 46.3139 83.3082 0
M  V30 1398 O  102.2065 45.5079 83.4142 0
M  V30 1399 C  100.7407 47.3928 85.5248 0
M  V30 1400 H  99.7117 47.0513 85.4041 0
M  V30 1401 H  101.2908 46.6023 86.0370 0
M  V30 1402 C  100.7185 48.6167 86.4478 0
M  V30 1403 O  101.5256 49.5456 86.2194 0
M  V30 1404 O  99.9489 48.5541 87.4317 0 CHG=-1
M  V30 1405 N  100.2280 46.1500 82.4929 0
M  V30 1406 H  99.5092 46.8598 82.4703 0
M  V30 1407 C  100.0451 45.0232 81.5760 0 CFG=2
M  V30 1408 H  100.2916 44.1078 82.1170 0
M  V30 1409 C  100.9845 45.1059 80.3576 0
M  V30 1410 O  101.5361 44.0774 79.9700 0
M  V30 1411 C  98.5660 44.9251 81.1502 0
M  V30 1412 H  98.2830 45.8126 80.5848 0
M  V30 1413 H  98.4488 44.0859 80.4628 0
M  V30 1414 C  97.5983 44.7313 82.3395 0
M  V30 1415 H  97.8236 43.7919 82.8450 0
M  V30 1416 H  97.7363 45.5188 83.0784 0
M  V30 1417 C  96.1163 44.7282 81.9560 0
M  V30 1418 O  95.8143 44.8666 80.7508 0
M  V30 1419 O  95.2991 44.5937 82.8924 0 CHG=-1
M  V30 1420 N  101.1969 46.3220 79.8166 0
M  V30 1421 H  100.6858 47.1162 80.1788 0
M  V30 1422 C  102.1662 46.6113 78.7509 0 CFG=2
M  V30 1423 H  101.9499 45.9524 77.9098 0
M  V30 1424 C  103.6169 46.3333 79.1889 0
M  V30 1425 O  104.3680 45.7404 78.4146 0
M  V30 1426 C  102.0366 48.0808 78.2894 0
M  V30 1427 H  102.1362 48.7182 79.1675 0
M  V30 1428 H  102.8781 48.3356 77.6467 0
M  V30 1429 C  100.7475 48.4503 77.5230 0
M  V30 1430 H  99.9110 47.9914 78.0467 0
M  V30 1431 C  100.5054 49.9772 77.5458 0
M  V30 1432 H  99.5712 50.2084 78.0588 0
M  V30 1433 H  101.2955 50.5133 78.0702 0
M  V30 1434 H  100.4414 50.4176 76.5517 0
M  V30 1435 C  100.7313 47.8705 76.0934 0
M  V30 1436 H  99.7976 47.3392 75.9108 0
M  V30 1437 H  100.8110 48.6356 75.3239 0
M  V30 1438 H  101.5487 47.1699 75.9219 0
M  V30 1439 N  103.9695 46.7382 80.4248 0
M  V30 1440 H  103.2977 47.2422 80.9890 0
M  V30 1441 C  105.2634 46.4585 81.0564 0 CFG=2
M  V30 1442 H  106.0198 46.7871 80.3407 0
M  V30 1443 C  105.4558 44.9607 81.3370 0
M  V30 1444 O  106.5464 44.4612 81.0802 0
M  V30 1445 C  105.4098 47.2685 82.3691 0
M  V30 1446 H  104.5440 47.1055 83.0131 0
M  V30 1447 H  106.2734 46.9005 82.9255 0
M  V30 1448 C  105.6563 48.7700 82.1797 0
M  V30 1449 O  106.3432 49.1888 81.2501 0
M  V30 1450 N  105.1285 49.5893 83.0915 0
M  V30 1451 H  105.2722 50.5857 83.0234 0
M  V30 1452 H  104.5659 49.2231 83.8463 0
M  V30 1453 N  104.4148 44.2725 81.8392 0
M  V30 1454 H  103.5470 44.7539 82.0357 0
M  V30 1455 C  104.4551 42.8507 82.1910 0 CFG=2
M  V30 1456 H  105.3268 42.7249 82.8365 0
M  V30 1457 C  104.6660 41.9376 80.9706 0
M  V30 1458 O  105.5673 41.1025 81.0092 0
M  V30 1459 C  103.2080 42.4916 83.0335 0
M  V30 1460 H  103.2112 43.1109 83.9307 0
M  V30 1461 H  102.3100 42.7723 82.4821 0
M  V30 1462 C  103.0588 41.0170 83.4674 0
M  V30 1463 H  102.1865 40.8807 84.1073 0
M  V30 1464 H  102.8461 40.4334 82.5707 0
M  V30 1465 C  104.3076 40.3964 84.1145 0
M  V30 1466 H  104.0815 39.3907 84.4696 0
M  V30 1467 H  105.0905 40.2947 83.3712 0
M  V30 1468 N  104.7962 41.1528 85.2741 0
M  V30 1469 H  104.1236 41.7500 85.7325 0
M  V30 1470 C  106.0324 41.0417 85.7932 0
M  V30 1471 N  106.9503 40.2192 85.2607 0
M  V30 1472 H  107.8747 40.1476 85.6582 0
M  V30 1473 H  106.7288 39.6482 84.4465 0
M  V30 1474 N  106.3585 41.7740 86.8654 0 CHG=1
M  V30 1475 H  107.2820 41.7055 87.2679 0
M  V30 1476 H  105.6854 42.4022 87.2794 0
M  V30 1477 N  103.8944 42.1510 79.8912 0
M  V30 1478 H  103.1714 42.8591 79.9166 0
M  V30 1479 C  104.0472 41.4142 78.6316 0 CFG=2
M  V30 1480 H  104.1336 40.3581 78.8909 0
M  V30 1481 C  105.3446 41.7172 77.8542 0
M  V30 1482 O  105.6848 40.9346 76.9697 0
M  V30 1483 C  102.7880 41.5846 77.7529 0
M  V30 1484 H  102.5785 42.6500 77.6412 0
M  V30 1485 H  102.9677 41.2117 76.7433 0
M  V30 1486 C  101.5376 40.8893 78.2759 0
M  V30 1487 C  101.5468 39.5088 78.5731 0
M  V30 1488 H  102.4498 38.9276 78.4589 0
M  V30 1489 C  100.3249 41.5992 78.3957 0
M  V30 1490 H  100.2900 42.6491 78.1541 0
M  V30 1491 C  100.3867 38.8812 79.0091 0
M  V30 1492 H  100.4006 37.8256 79.2370 0
M  V30 1493 C  99.1754 40.9548 78.8336 0
M  V30 1494 H  98.2520 41.5050 78.9341 0
M  V30 1495 C  99.2064 39.6011 79.1394 0
M  V30 1496 H  98.3069 39.1052 79.4729 0
M  V30 1497 N  106.0617 42.7975 78.2139 0
M  V30 1498 H  105.7096 43.4047 78.9408 0
M  V30 1499 C  107.3983 43.1099 77.7058 0 CFG=2
M  V30 1500 H  107.4969 42.7018 76.6977 0
M  V30 1501 C  108.4939 42.4615 78.5758 0
M  V30 1502 O  109.4705 41.9665 78.0193 0
M  V30 1503 C  107.5462 44.6459 77.5955 0
M  V30 1504 H  106.6932 45.0131 77.0230 0
M  V30 1505 H  107.4505 45.1162 78.5752 0
M  V30 1506 C  108.8151 45.1452 76.8675 0
M  V30 1507 H  109.0217 44.5136 76.0057 0
M  V30 1508 H  108.6123 46.1406 76.4765 0
M  V30 1509 C  110.0745 45.2571 77.7311 0
M  V30 1510 O  110.0152 45.6726 78.8865 0
M  V30 1511 N  111.2278 44.9049 77.1584 0
M  V30 1512 H  112.0909 44.9661 77.6776 0
M  V30 1513 H  111.2459 44.5625 76.2069 0
M  V30 1514 N  108.3231 42.4750 79.9099 0
M  V30 1515 H  107.5018 42.9220 80.2970 0
M  V30 1516 C  109.2806 41.9494 80.8911 0 CFG=2
M  V30 1517 H  110.2766 42.2425 80.5542 0
M  V30 1518 C  109.3240 40.4153 80.9944 0
M  V30 1519 O  110.3664 39.8836 81.3749 0
M  V30 1520 C  109.0206 42.5979 82.2696 0
M  V30 1521 H  107.9542 42.5466 82.4943 0
M  V30 1522 H  109.5053 42.0194 83.0584 0
M  V30 1523 C  109.4910 44.0647 82.3713 0
M  V30 1524 H  109.0635 44.6627 81.5664 0
M  V30 1525 H  109.1213 44.4966 83.3017 0
M  V30 1526 C  111.0152 44.2065 82.3665 0
M  V30 1527 O  111.6943 43.6764 83.2424 0
M  V30 1528 N  111.5589 44.9353 81.3902 0
M  V30 1529 H  112.5594 45.0618 81.3537 0
M  V30 1530 H  110.9775 45.3470 80.6705 0
M  V30 1531 N  108.2279 39.7356 80.6178 0
M  V30 1532 H  107.3885 40.2459 80.3772 0
M  V30 1533 C  108.1677 38.2767 80.4472 0 CFG=2
M  V30 1534 H  108.8363 37.8184 81.1788 0
M  V30 1535 C  108.6727 37.8232 79.0630 0
M  V30 1536 O  108.8336 36.6200 78.8597 0
M  V30 1537 C  106.7536 37.6914 80.6968 0
M  V30 1538 H  106.0890 38.0623 79.9143 0
M  V30 1539 H  106.7824 36.6038 80.6195 0
M  V30 1540 C  106.1157 38.0418 82.0457 0
M  V30 1541 O  106.8559 38.4212 82.9816 0
M  V30 1542 O  104.8826 37.8595 82.1393 0 CHG=-1
M  V30 1543 N  108.8967 38.7722 78.1362 0
M  V30 1544 H  108.7722 39.7435 78.3866 0
M  V30 1545 C  109.2674 38.5138 76.7453 0 CFG=2
M  V30 1546 H  109.7502 37.5391 76.6663 0
M  V30 1547 C  110.3043 39.5258 76.1926 0
M  V30 1548 O  110.0744 40.0675 75.1098 0
M  V30 1549 C  107.9718 38.5007 75.9023 0
M  V30 1550 H  107.4480 39.4480 76.0099 0
M  V30 1551 H  108.2127 38.4242 74.8479 0
M  V30 1552 C  107.0093 37.3698 76.1557 0
M  V30 1553 N  107.3683 36.0493 75.9360 0 CHG=1
M  V30 1554 H  108.2494 35.7260 75.5559 0
M  V30 1555 C  105.7513 37.3588 76.7288 0
M  V30 1556 H  105.1162 38.1579 77.0828 0
M  V30 1557 C  106.3209 35.3018 76.2734 0
M  V30 1558 H  106.2833 34.2265 76.1748 0
M  V30 1559 N  105.3209 36.0437 76.7415 0
M  V30 1560 N  111.4161 39.8109 76.9172 0
M  V30 1561 C  112.3886 40.8385 76.4875 0 CFG=2
M  V30 1562 H  111.8726 41.7806 76.2922 0
M  V30 1563 C  113.2007 40.4718 75.2267 0
M  V30 1564 O  113.6826 41.3748 74.5446 0
M  V30 1565 C  113.2941 41.0035 77.7175 0
M  V30 1566 H  114.2995 41.3560 77.4828 0
M  V30 1567 H  112.8455 41.7269 78.4007 0
M  V30 1568 C  113.2977 39.6262 78.3618 0
M  V30 1569 H  113.9857 38.9714 77.8256 0
M  V30 1570 H  113.5947 39.6377 79.4108 0
M  V30 1571 C  111.8649 39.1537 78.1473 0
M  V30 1572 H  111.7978 38.0659 78.1014 0
M  V30 1573 H  111.2532 39.5068 78.9735 0
M  V30 1574 N  113.3141 39.1636 74.9389 0
M  V30 1575 H  112.9070 38.4930 75.5744 0
M  V30 1576 C  114.0341 38.5823 73.7992 0 CFG=2
M  V30 1577 H  114.9693 39.1357 73.6924 0
M  V30 1578 C  113.2923 38.7295 72.4544 0
M  V30 1579 O  113.8968 38.4563 71.4174 0
M  V30 1580 C  114.4039 37.0938 74.0323 0
M  V30 1581 H  113.4911 36.5010 73.9632 0
M  V30 1582 H  115.0783 36.7496 73.2472 0
M  V30 1583 C  115.0543 36.7716 75.3848 0
M  V30 1584 O  115.6763 37.6814 75.9768 0
M  V30 1585 O  114.9740 35.5858 75.7712 0 CHG=-1
M  V30 1586 N  112.0195 39.1613 72.4872 0
M  V30 1587 H  111.5962 39.3570 73.3831 0
M  V30 1588 C  111.1727 39.3711 71.3126 0 CFG=2
M  V30 1589 H  111.8140 39.3996 70.4323 0
M  V30 1590 C  110.4705 40.7400 71.2906 0
M  V30 1591 O  110.1395 41.1894 70.1954 0
M  V30 1592 C  110.2085 38.1826 71.0682 0
M  V30 1593 H  109.4383 38.5160 70.3743 0
M  V30 1594 H  110.7269 37.3904 70.5295 0
M  V30 1595 C  109.4674 37.6205 72.2986 0
M  V30 1596 H  109.1719 38.4490 72.9371 0
M  V30 1597 H  108.5454 37.1468 71.9633 0
M  V30 1598 C  110.2145 36.5563 73.1173 0
M  V30 1599 O  109.9287 36.3824 74.2984 0
M  V30 1600 N  111.1522 35.8216 72.5146 0
M  V30 1601 H  111.6510 35.1141 73.0349 0
M  V30 1602 H  111.3789 35.9727 71.5422 0
M  V30 1603 N  110.2885 41.3972 72.4507 0
M  V30 1604 H  110.5744 40.9783 73.3256 0
M  V30 1605 C  109.6947 42.7346 72.5510 0 CFG=2
M  V30 1606 H  109.3362 43.0760 71.5790 0
M  V30 1607 C  110.7731 43.7102 73.0563 0
M  V30 1608 O  111.3166 43.5129 74.1446 0
M  V30 1609 C  108.4931 42.7884 73.5402 0
M  V30 1610 H  108.8570 42.6046 74.5527 0
M  V30 1611 C  107.7864 44.1609 73.5377 0
M  V30 1612 H  106.9455 44.1726 74.2319 0
M  V30 1613 H  108.4484 44.9753 73.8270 0
M  V30 1614 H  107.3993 44.3962 72.5462 0
M  V30 1615 C  107.4551 41.6947 73.2460 0
M  V30 1616 H  106.6011 41.7644 73.9208 0
M  V30 1617 H  107.0826 41.7608 72.2233 0
M  V30 1618 H  107.8910 40.7076 73.3846 0
M  V30 1619 N  111.0563 44.7458 72.2494 0
M  V30 1620 H  110.5390 44.8608 71.3885 0
M  V30 1621 C  112.0492 45.7822 72.5397 0 CFG=2
M  V30 1622 H  112.9127 45.2907 72.9888 0
M  V30 1623 C  111.5472 46.8215 73.5608 0
M  V30 1624 O  112.3439 47.2725 74.3834 0
M  V30 1625 C  112.5062 46.4138 71.2001 0
M  V30 1626 H  112.9512 45.6320 70.5829 0
M  V30 1627 H  111.6215 46.7466 70.6605 0
M  V30 1628 C  113.4839 47.6130 71.2680 0
M  V30 1629 H  112.9888 48.4156 71.8160 0
M  V30 1630 C  114.7877 47.2812 72.0234 0
M  V30 1631 H  115.6842 47.5801 71.4806 0
M  V30 1632 H  114.8145 47.7943 72.9851 0
M  V30 1633 H  114.8764 46.2160 72.2221 0
M  V30 1634 C  113.7531 48.1721 69.8548 0
M  V30 1635 H  114.7955 48.0833 69.5519 0
M  V30 1636 H  113.1666 47.6520 69.0988 0
M  V30 1637 H  113.4871 49.2280 69.7971 0
M  V30 1638 N  110.2526 47.1712 73.5069 0
M  V30 1639 H  109.6420 46.7628 72.8120 0
M  V30 1640 C  109.6742 48.1820 74.3859 0
M  V30 1641 H  109.6638 47.8296 75.4165 0
M  V30 1642 H  110.2802 49.0894 74.3541 0
M  V30 1643 C  108.2504 48.5134 73.9289 0
M  V30 1644 O  107.6477 47.7885 73.1361 0
M  V30 1645 N  107.7291 49.6363 74.4472 0
M  V30 1646 H  108.2736 50.1771 75.1041 0
M  V30 1647 C  106.4531 50.2418 74.0639 0 CFG=2
M  V30 1648 H  106.3562 50.1424 72.9855 0
M  V30 1649 C  106.4920 51.7387 74.4173 0
M  V30 1650 O  107.1041 52.0996 75.4249 0
M  V30 1651 C  105.2693 49.5118 74.7445 0
M  V30 1652 H  104.3390 49.8858 74.3149 0
M  V30 1653 H  105.2940 48.4498 74.4981 0
M  V30 1654 C  105.1439 49.6481 76.2364 0
M  V30 1655 C  105.7126 48.8314 77.1523 0
M  V30 1656 H  106.2981 47.9554 76.9127 0
M  V30 1657 C  104.4781 50.7029 77.0001 0
M  V30 1658 N  105.4296 49.2948 78.4203 0
M  V30 1659 H  105.7601 48.8384 79.2618 0
M  V30 1660 C  103.7380 51.8601 76.6608 0
M  V30 1661 H  103.5739 52.0947 75.6199 0
M  V30 1662 C  104.6710 50.4455 78.3908 0
M  V30 1663 C  103.2242 52.7176 77.6544 0
M  V30 1664 H  102.6718 53.6000 77.3692 0
M  V30 1665 C  104.1546 51.2872 79.3919 0
M  V30 1666 H  104.3201 51.0623 80.4351 0
M  V30 1667 C  103.4377 52.4374 79.0174 0
M  V30 1668 H  103.0527 53.1064 79.7727 0
M  V30 1669 N  105.8084 52.5771 73.6186 0
M  V30 1670 H  105.3369 52.2236 72.7954 0
M  V30 1671 C  105.7043 54.0200 73.8566 0 CFG=2
M  V30 1672 H  105.4534 54.1645 74.9086 0
M  V30 1673 C  104.5803 54.6595 73.0317 0
M  V30 1674 O  104.3393 54.2480 71.8973 0
M  V30 1675 C  107.0470 54.7128 73.5521 0
M  V30 1676 H  106.9734 55.7930 73.6837 0
M  V30 1677 H  107.8410 54.3658 74.2132 0
M  V30 1678 H  107.3655 54.5256 72.5257 0
M  V30 1679 N  103.9453 55.6884 73.6122 0
M  V30 1680 H  104.2134 55.9890 74.5385 0
M  V30 1681 C  102.9019 56.4693 72.9577 0
M  V30 1682 H  103.3501 57.0505 72.1540 0
M  V30 1683 H  102.1336 55.8259 72.5302 0
M  V30 1684 C  102.2891 57.4279 73.9807 0
M  V30 1685 O  102.9789 57.8847 74.8915 0
M  V30 1686 N  100.9909 57.7389 73.8106 0
M  V30 1687 H  100.4948 57.3359 73.0281 0
M  V30 1688 C  100.1879 58.6220 74.6738 0 CFG=2
M  V30 1689 H  100.6507 59.6094 74.6480 0
M  V30 1690 C  100.1359 58.1972 76.1542 0
M  V30 1691 O  100.0454 59.0601 77.0246 0
M  V30 1692 C  98.7708 58.7264 74.0668 0
M  V30 1693 H  98.8333 59.1345 73.0604 0
M  V30 1694 H  98.3676 57.7210 73.9494 0
M  V30 1695 C  97.7482 59.5626 74.8212 0
M  V30 1696 C  97.6965 60.9583 74.6249 0
M  V30 1697 H  98.3936 61.4417 73.9558 0
M  V30 1698 C  96.8282 58.9478 75.6983 0
M  V30 1699 H  96.8573 57.8807 75.8572 0
M  V30 1700 C  96.7265 61.7299 75.2930 0
M  V30 1701 H  96.6936 62.7978 75.1334 0
M  V30 1702 C  95.8612 59.7198 76.3696 0
M  V30 1703 H  95.1607 59.2418 77.0394 0
M  V30 1704 C  95.8080 61.1117 76.1647 0
M  V30 1705 O  94.8708 61.8589 76.8164 0
M  V30 1706 H  94.9416 62.7973 76.6261 0
M  V30 1707 N  100.2212 56.8828 76.4122 0
M  V30 1708 H  100.2936 56.2351 75.6417 0
M  V30 1709 C  100.2202 56.2911 77.7493 0 CFG=2
M  V30 1710 H  99.4630 56.8090 78.3415 0
M  V30 1711 C  101.5505 56.4916 78.5143 0
M  V30 1712 O  101.5789 56.2299 79.7164 0
M  V30 1713 C  99.8016 54.8061 77.6568 0
M  V30 1714 H  100.4566 54.2536 76.9844 0
M  V30 1715 H  99.9592 54.3728 78.6431 0
M  V30 1716 C  98.3140 54.5754 77.2815 0
M  V30 1717 H  97.7273 55.3169 77.8265 0
M  V30 1718 C  98.0125 54.7871 75.7793 0
M  V30 1719 H  97.5375 53.9266 75.3102 0
M  V30 1720 H  97.3393 55.6316 75.6419 0
M  V30 1721 H  98.9071 54.9959 75.1966 0
M  V30 1722 C  97.8173 53.2030 77.7806 0
M  V30 1723 H  97.1124 53.3390 78.6011 0
M  V30 1724 H  97.2995 52.6240 77.0169 0
M  V30 1725 H  98.6306 52.5787 78.1513 0
M  V30 1726 N  102.5948 57.0078 77.8386 0
M  V30 1727 H  102.4862 57.2025 76.8519 0
M  V30 1728 C  103.7605 57.6337 78.4614 0 CFG=2
M  V30 1729 H  103.7860 57.4288 79.5335 0
M  V30 1730 C  103.6293 59.1510 78.2557 0
M  V30 1731 O  103.8977 59.6336 77.1557 0
M  V30 1732 C  105.0778 57.1070 77.8479 0
M  V30 1733 H  105.1577 57.3833 76.7950 0
M  V30 1734 H  105.9018 57.6108 78.3555 0
M  V30 1735 C  105.2829 55.5903 77.9722 0
M  V30 1736 H  105.0464 55.2150 78.9686 0
M  V30 1737 H  104.5694 55.1304 77.2890 0
M  V30 1738 C  106.7008 55.1686 77.5571 0
M  V30 1739 H  106.7494 55.2464 76.4721 0
M  V30 1740 H  107.4844 55.8276 77.9323 0
M  V30 1741 N  106.9596 53.7454 77.8095 0
M  V30 1742 H  106.8517 53.1308 77.0093 0
M  V30 1743 C  107.3161 53.1982 78.9834 0
M  V30 1744 N  107.4678 53.9462 80.0852 0
M  V30 1745 H  107.7380 53.5235 80.9613 0
M  V30 1746 H  107.3123 54.9426 80.0412 0
M  V30 1747 N  107.5278 51.8782 79.0501 0 CHG=1
M  V30 1748 H  107.7819 51.4376 79.9226 0
M  V30 1749 H  107.3887 51.3007 78.2323 0
M  V30 1750 N  103.1986 59.8610 79.3144 0
M  V30 1751 H  102.9928 59.3663 80.1700 0
M  V30 1752 C  102.9246 61.3035 79.3515 0 CFG=2
M  V30 1753 H  102.6336 61.5320 80.3778 0
M  V30 1754 C  101.7459 61.6950 78.4409 0
M  V30 1755 O  101.9541 62.0374 77.2774 0
M  V30 1756 C  104.1983 62.1240 79.0486 0
M  V30 1757 H  103.9999 63.1931 79.1152 0
M  V30 1758 H  104.9894 61.8946 79.7627 0
M  V30 1759 H  104.5915 61.9399 78.0489 0
M  V30 1760 N  100.5263 61.6398 79.0034 0
M  V30 1761 H  100.4381 61.3571 79.9687 0
M  V30 1762 C  99.2648 61.9973 78.3409 0 CFG=2
M  V30 1763 H  99.2471 61.4796 77.3811 0
M  V30 1764 C  99.1073 63.4963 78.0090 0
M  V30 1765 O  98.2796 63.8314 77.1625 0
M  V30 1766 C  98.0941 61.4475 79.1800 0
M  V30 1767 H  97.1571 61.5616 78.6356 0
M  V30 1768 H  98.2201 60.3789 79.3590 0
M  V30 1769 O  97.9646 62.1198 80.4185 0
M  V30 1770 H  97.1935 61.7738 80.8746 0
M  V30 1771 N  99.9306 64.3591 78.6302 0
M  V30 1772 H  100.5549 64.0104 79.3463 0
M  V30 1773 C  100.0871 65.7754 78.2922 0 CFG=2
M  V30 1774 H  99.0859 66.1918 78.1664 0
M  V30 1775 C  100.8348 66.0149 76.9594 0
M  V30 1776 O  100.8279 67.1461 76.4751 0
M  V30 1777 C  100.7507 66.5259 79.4758 0
M  V30 1778 H  100.7028 67.5908 79.2435 0
M  V30 1779 H  100.1397 66.4175 80.3734 0
M  V30 1780 C  102.2347 66.1992 79.7901 0
M  V30 1781 H  102.8075 66.0078 78.8828 0
M  V30 1782 H  102.6815 67.0887 80.2365 0
M  V30 1783 C  102.4609 65.0484 80.7792 0
M  V30 1784 O  101.6038 64.1923 80.9842 0
M  V30 1785 N  103.6491 65.0079 81.3851 0
M  V30 1786 H  103.8550 64.2697 82.0422 0
M  V30 1787 H  104.3454 65.7148 81.1988 0
M  V30 1788 N  101.4589 64.9620 76.4036 0
M  V30 1789 H  101.3911 64.0593 76.8547 0
M  V30 1790 C  102.1963 64.9646 75.1441 0 CFG=2
M  V30 1791 H  102.1605 65.9533 74.6828 0
M  V30 1792 C  101.5887 63.9570 74.1532 0
M  V30 1793 O  100.8096 63.0853 74.5442 0
M  V30 1794 C  103.6626 64.6120 75.4485 0
M  V30 1795 H  104.2750 64.6356 74.5464 0
M  V30 1796 H  104.0968 65.3226 76.1527 0
M  V30 1797 H  103.7552 63.6166 75.8851 0
M  V30 1798 N  101.9991 64.0998 72.8800 0
M  V30 1799 H  102.6438 64.8506 72.6811 0
M  V30 1800 C  101.6178 63.3047 71.7034 0 CFG=2
M  V30 1801 H  102.2737 63.6615 70.9078 0
M  V30 1802 C  100.1659 63.5399 71.2228 0
M  V30 1803 O  99.2805 63.8658 72.0141 0
M  V30 1804 C  101.8624 61.7656 71.8546 0 CFG=2
M  V30 1805 H  101.9402 61.3717 70.8408 0
M  V30 1806 O  100.7781 61.0584 72.4249 0
M  V30 1807 H  100.6397 61.4051 73.3128 0
M  V30 1808 C  103.1738 61.3657 72.5505 0
M  V30 1809 H  103.3312 60.2882 72.4887 0
M  V30 1810 H  104.0299 61.8510 72.0817 0
M  V30 1811 H  103.1750 61.6302 73.6079 0
M  V30 1812 N  99.9604 63.3234 69.9134 0
M  V30 1813 H  100.7459 63.0695 69.3321 0
M  V30 1814 C  98.6538 63.3519 69.2540 0
M  V30 1815 H  97.9386 63.9693 69.8000 0
M  V30 1816 H  98.7731 63.8044 68.2692 0
M  V30 1817 C  98.0802 61.9335 69.0875 0
M  V30 1818 O  97.1833 61.7485 68.2663 0
M  V30 1819 N  98.6007 60.9354 69.8278 0
M  V30 1820 H  99.3148 61.1584 70.5080 0
M  V30 1821 C  98.2712 59.5092 69.7090 0 CFG=2
M  V30 1822 H  98.0457 59.3049 68.6613 0
M  V30 1823 C  97.0016 59.0952 70.4907 0
M  V30 1824 O  96.8891 57.9366 70.8891 0
M  V30 1825 C  99.5184 58.6650 70.0704 0
M  V30 1826 H  99.7942 58.8281 71.1098 0
M  V30 1827 H  99.2798 57.6040 69.9903 0
M  V30 1828 C  100.7447 58.9479 69.1824 0
M  V30 1829 H  100.5777 58.5626 68.1769 0
M  V30 1830 H  100.8963 60.0207 69.0718 0
M  V30 1831 S  102.3080 58.2843 69.8159 0
M  V30 1832 C  102.1134 56.5185 69.4617 0
M  V30 1833 H  102.9495 55.9557 69.8766 0
M  V30 1834 H  101.1907 56.1306 69.8915 0
M  V30 1835 H  102.0990 56.3573 68.3852 0
M  V30 1836 N  96.0520 60.0323 70.6509 0
M  V30 1837 H  96.2203 60.9572 70.2791 0
M  V30 1838 C  94.6946 59.8127 71.1457 0 CFG=2
M  V30 1839 H  94.4269 58.7637 71.0288 0
M  V30 1840 C  93.7115 60.6443 70.3083 0
M  V30 1841 O  94.0441 61.7605 69.9065 0
M  V30 1842 C  94.6146 60.1794 72.6343 0
M  V30 1843 H  93.5974 60.0733 73.0128 0
M  V30 1844 H  95.2520 59.5271 73.2300 0
M  V30 1845 H  94.9300 61.2082 72.8126 0
M  V30 1846 N  92.5198 60.0783 70.0580 0
M  V30 1847 H  92.3040 59.1701 70.4489 0
M  V30 1848 C  91.4530 60.6866 69.2554 0 CFG=2
M  V30 1849 H  91.9067 61.1487 68.3760 0
M  V30 1850 C  90.6837 61.7784 70.0322 0
M  V30 1851 O  90.7123 61.8037 71.2634 0
M  V30 1852 C  90.4480 59.6028 68.7788 0 CFG=2
M  V30 1853 H  89.6713 60.0835 68.1814 0
M  V30 1854 O  89.7892 58.9653 69.8592 0
M  V30 1855 H  88.8899 59.3163 69.9220 0
M  V30 1856 C  91.1020 58.5323 67.8944 0
M  V30 1857 H  90.3555 57.8437 67.4996 0
M  V30 1858 H  91.6142 58.9815 67.0430 0
M  V30 1859 H  91.8311 57.9455 68.4511 0
M  V30 1860 N  90.0284 62.6761 69.2733 0
M  V30 1861 H  90.0569 62.5789 68.2687 0
M  V30 1862 C  89.3377 63.8723 69.7686 0 CFG=2
M  V30 1863 H  90.0578 64.4340 70.3668 0
M  V30 1864 C  88.1166 63.6025 70.6670 0
M  V30 1865 O  87.8663 64.3957 71.5741 0
M  V30 1866 C  88.9396 64.7469 68.5702 0
M  V30 1867 H  88.4487 65.6653 68.8951 0
M  V30 1868 H  89.8154 65.0360 67.9884 0
M  V30 1869 H  88.2546 64.2228 67.9022 0
M  V30 1870 N  87.4031 62.4876 70.4266 0
M  V30 1871 H  87.6734 61.8756 69.6695 0
M  V30 1872 C  86.3010 62.0020 71.2723 0 CFG=2
M  V30 1873 H  85.7245 62.8731 71.5893 0
M  V30 1874 C  86.7982 61.3233 72.5686 0
M  V30 1875 O  85.9924 61.0960 73.4709 0
M  V30 1876 C  85.3135 61.0710 70.5155 0
M  V30 1877 H  84.5999 60.6388 71.2167 0
M  V30 1878 H  84.7432 61.6958 69.8272 0
M  V30 1879 C  85.9272 59.9289 69.6912 0
M  V30 1880 O  87.1124 59.5988 69.9142 0
M  V30 1881 O  85.1592 59.3493 68.8934 0 CHG=-1
M  V30 1882 N  88.1069 61.0094 72.6219 0
M  V30 1883 H  88.6805 61.2574 71.8273 0
M  V30 1884 C  88.8345 60.3418 73.7039 0 CFG=2
M  V30 1885 H  89.8756 60.2975 73.3831 0
M  V30 1886 C  88.4093 58.8746 73.9105 0
M  V30 1887 O  88.6124 58.3432 74.9985 0
M  V30 1888 C  88.7827 61.1674 75.0128 0
M  V30 1889 H  87.7654 61.1630 75.4031 0
M  V30 1890 H  89.4004 60.6848 75.7711 0
M  V30 1891 C  89.2662 62.6212 74.8560 0
M  V30 1892 H  90.2377 62.6266 74.3600 0
M  V30 1893 H  88.5907 63.1682 74.1975 0
M  V30 1894 C  89.3797 63.3801 76.1877 0
M  V30 1895 H  90.1623 62.9198 76.7909 0
M  V30 1896 H  89.7214 64.3951 75.9814 0
M  V30 1897 C  88.0686 63.4356 76.9903 0
M  V30 1898 H  87.2609 63.8345 76.3759 0
M  V30 1899 H  87.7717 62.4379 77.3139 0
M  V30 1900 N  88.2101 64.2740 78.1908 0 CHG=1
M  V30 1901 H  88.9573 63.8960 78.7701 0
M  V30 1902 H  88.4440 65.2192 77.9255 0
M  V30 1903 H  87.3486 64.2682 78.7167 0
M  V30 1904 N  87.8409 58.2371 72.8736 0
M  V30 1905 H  87.6857 58.7337 72.0059 0
M  V30 1906 C  87.4096 56.8377 72.9071 0 CFG=2
M  V30 1907 H  87.0847 56.5840 73.9185 0
M  V30 1908 C  88.5352 55.8602 72.5291 0
M  V30 1909 O  88.4644 54.7003 72.9348 0
M  V30 1910 C  86.2046 56.6566 71.9646 0
M  V30 1911 H  86.4792 56.9580 70.9524 0
M  V30 1912 H  85.9445 55.5982 71.9063 0
M  V30 1913 C  84.9583 57.4360 72.4150 0
M  V30 1914 H  84.6764 57.1266 73.4222 0
M  V30 1915 H  85.1919 58.4990 72.4764 0
M  V30 1916 C  83.7734 57.2359 71.4620 0
M  V30 1917 H  84.0866 57.4543 70.4410 0
M  V30 1918 H  83.4803 56.1853 71.4705 0
M  V30 1919 C  82.5664 58.1060 71.8332 0
M  V30 1920 H  82.1833 57.8276 72.8156 0
M  V30 1921 H  82.8561 59.1556 71.8861 0
M  V30 1922 N  81.4910 57.9728 70.8371 0 CHG=1
M  V30 1923 H  81.8384 58.2603 69.9327 0
M  V30 1924 H  81.1892 57.0101 70.7911 0
M  V30 1925 H  80.7116 58.5590 71.0998 0
M  V30 1926 N  89.5343 56.3345 71.7641 0
M  V30 1927 H  89.5294 57.3048 71.4795 0
M  V30 1928 C  90.6413 55.5321 71.2470 0 CFG=2
M  V30 1929 H  90.6596 54.5636 71.7484 0
M  V30 1930 C  91.9859 56.2166 71.5161 0
M  V30 1931 O  92.0741 57.4441 71.5636 0
M  V30 1932 C  90.4568 55.3013 69.7321 0
M  V30 1933 H  90.3848 56.2567 69.2183 0
M  V30 1934 H  91.3394 54.8082 69.3207 0
M  V30 1935 C  89.2512 54.4642 69.3537 0
M  V30 1936 C  89.3548 53.0592 69.3164 0
M  V30 1937 H  90.2934 52.5760 69.5438 0
M  V30 1938 C  88.0234 55.0857 69.0429 0
M  V30 1939 H  87.9388 56.1629 69.0642 0
M  V30 1940 C  88.2322 52.2785 68.9875 0
M  V30 1941 H  88.3221 51.2033 68.9641 0
M  V30 1942 C  86.8975 54.3031 68.7229 0
M  V30 1943 H  85.9557 54.7833 68.5012 0
M  V30 1944 C  86.9994 52.8982 68.7040 0
M  V30 1945 O  85.9029 52.1378 68.4203 0
M  V30 1946 H  86.0546 51.1989 68.5547 0
M  V30 1947 N  93.0142 55.3728 71.6567 0
M  V30 1948 H  92.8451 54.3771 71.5979 0
M  V30 1949 C  94.4169 55.7403 71.8183 0 CFG=2
M  V30 1950 H  94.6428 56.5316 71.1047 0
M  V30 1951 C  95.2826 54.5253 71.4341 0
M  V30 1952 O  94.7503 53.4214 71.3199 0
M  V30 1953 C  94.7289 56.2224 73.2693 0 CFG=2
M  V30 1954 H  94.0769 57.0611 73.5110 0
M  V30 1955 O  96.0555 56.6916 73.3761 0
M  V30 1956 H  96.1801 57.4115 72.7496 0
M  V30 1957 C  94.5826 55.1479 74.3624 0
M  V30 1958 H  94.7434 55.5743 75.3527 0
M  V30 1959 H  93.5887 54.7049 74.3556 0
M  V30 1960 H  95.3050 54.3412 74.2419 0
M  V30 1961 N  96.5911 54.7290 71.2241 0
M  V30 1962 H  96.9973 55.6487 71.3346 0
M  V30 1963 C  97.5068 53.6432 70.8841 0 CFG=2
M  V30 1964 H  97.1720 52.7460 71.4010 0
M  V30 1965 C  98.9192 53.9377 71.3965 0
M  V30 1966 O  99.2920 55.0972 71.5913 0
M  V30 1967 C  97.4601 53.3674 69.3599 0
M  V30 1968 H  97.8603 52.3692 69.1749 0
M  V30 1969 H  96.4241 53.3175 69.0225 0
M  V30 1970 C  98.1981 54.3391 68.4529 0
M  V30 1971 C  97.6619 55.6167 68.1874 0
M  V30 1972 H  96.7096 55.9054 68.6065 0
M  V30 1973 C  99.4710 54.0098 67.9407 0
M  V30 1974 H  99.9245 53.0589 68.1774 0
M  V30 1975 C  98.3486 56.4976 67.3628 0
M  V30 1976 H  97.9274 57.4660 67.1409 0
M  V30 1977 C  100.1357 54.9006 67.1097 0
M  V30 1978 H  101.0978 54.6354 66.6962 0
M  V30 1979 C  99.5730 56.1362 66.8163 0
M  V30 1980 H  100.0969 56.8260 66.1713 0
M  V30 1981 N  99.6803 52.8459 71.5561 0
M  V30 1982 H  99.2776 51.9338 71.3889 0
M  V30 1983 C  101.1264 52.8632 71.7344 0 CFG=2
M  V30 1984 H  101.5089 53.8743 71.5931 0
M  V30 1985 C  101.7461 51.9764 70.6454 0
M  V30 1986 O  101.2053 50.9156 70.3268 0
M  V30 1987 C  101.5739 52.3456 73.1361 0
M  V30 1988 H  102.6499 52.5061 73.1981 0
M  V30 1989 C  100.9683 53.1879 74.2689 0
M  V30 1990 H  101.3588 52.8852 75.2391 0
M  V30 1991 H  101.1886 54.2472 74.1413 0
M  V30 1992 H  99.8861 53.0722 74.3069 0
M  V30 1993 C  101.3739 50.8422 73.4146 0
M  V30 1994 H  101.6516 50.6049 74.4408 0
M  V30 1995 H  100.3373 50.5411 73.2705 0
M  V30 1996 H  101.9992 50.2179 72.7774 0
M  V30 1997 N  102.8839 52.4324 70.1069 0
M  V30 1998 H  103.2804 53.2991 70.4463 0
M  V30 1999 C  103.7299 51.6607 69.2060 0 CFG=2
M  V30 2000 H  103.0951 51.1052 68.5155 0
M  V30 2001 C  104.5802 50.6804 70.0307 0
M  V30 2002 O  105.1783 51.1002 71.0209 0
M  V30 2003 C  104.5939 52.6382 68.3883 0
M  V30 2004 H  103.9604 53.3079 67.8050 0
M  V30 2005 H  105.2018 53.2638 69.0438 0
M  V30 2006 O  105.4494 51.9487 67.5030 0
M  V30 2007 H  104.9359 51.6352 66.7525 0
M  V30 2008 N  104.6139 49.4089 69.6042 0
M  V30 2009 H  104.1082 49.1530 68.7651 0
M  V30 2010 C  105.3670 48.3353 70.2502 0 CFG=2
M  V30 2011 H  105.8445 48.6862 71.1610 0
M  V30 2012 C  106.4275 47.8253 69.2450 0
M  V30 2013 O  106.0928 46.9993 68.3930 0
M  V30 2014 C  104.4359 47.1627 70.7011 0 CFG=2
M  V30 2015 H  103.8994 46.7981 69.8280 0
M  V30 2016 C  103.3748 47.6711 71.7098 0
M  V30 2017 H  103.8790 48.1428 72.5522 0
M  V30 2018 H  102.7702 48.4533 71.2501 0
M  V30 2019 C  105.2123 45.9615 71.2965 0
M  V30 2020 H  104.5476 45.1269 71.5151 0
M  V30 2021 H  105.9717 45.5633 70.6248 0
M  V30 2022 H  105.7072 46.2382 72.2266 0
M  V30 2023 C  102.4219 46.5972 72.2550 0
M  V30 2024 H  101.5579 47.0575 72.7336 0
M  V30 2025 H  102.0589 45.9409 71.4637 0
M  V30 2026 H  102.9106 45.9813 73.0100 0
M  V30 2027 N  107.6843 48.3252 69.3384 0
M  V30 2028 C  108.8162 47.7440 68.5917 0 CFG=2
M  V30 2029 H  108.5624 47.6365 67.5354 0
M  V30 2030 C  109.2451 46.3698 69.1425 0
M  V30 2031 O  109.0786 46.1030 70.3347 0
M  V30 2032 C  109.9250 48.7959 68.7535 0
M  V30 2033 H  110.9327 48.3844 68.6985 0
M  V30 2034 H  109.8343 49.5384 67.9603 0
M  V30 2035 C  109.6367 49.4568 70.0883 0
M  V30 2036 H  110.0043 48.8230 70.8970 0
M  V30 2037 H  110.0955 50.4398 70.1963 0
M  V30 2038 C  108.1143 49.4930 70.1180 0
M  V30 2039 H  107.7696 49.5112 71.1477 0
M  V30 2040 H  107.7441 50.3917 69.6223 0
M  V30 2041 N  109.7938 45.5332 68.2489 0
M  V30 2042 H  109.8849 45.8238 67.2844 0
M  V30 2043 C  110.2632 44.1802 68.5442 0 CFG=2
M  V30 2044 H  110.1349 43.9525 69.6020 0
M  V30 2045 C  111.7593 44.0445 68.2386 0
M  V30 2046 O  112.3030 44.7805 67.4142 0
M  V30 2047 C  109.4700 43.1470 67.7077 0
M  V30 2048 H  109.4711 43.4097 66.6492 0
M  V30 2049 H  110.0082 42.1990 67.7567 0
M  V30 2050 C  108.0308 42.8847 68.2040 0
M  V30 2051 H  108.0227 43.0042 69.2885 0
M  V30 2052 C  107.0308 43.8983 67.6231 0
M  V30 2053 H  106.2755 44.1743 68.3592 0
M  V30 2054 H  107.5070 44.8159 67.2871 0
M  V30 2055 H  106.5267 43.4886 66.7503 0
M  V30 2056 C  107.5797 41.4394 67.9173 0
M  V30 2057 H  106.5449 41.3977 67.5796 0
M  V30 2058 H  108.1900 40.9580 67.1522 0
M  V30 2059 H  107.6424 40.8270 68.8177 0
M  V30 2060 N  112.3767 43.0454 68.8888 0
M  V30 2061 H  111.8369 42.4783 69.5281 0
M  V30 2062 C  113.7270 42.5590 68.6045 0 CFG=2
M  V30 2063 H  114.4117 43.4089 68.6087 0
M  V30 2064 C  113.8063 41.8739 67.2240 0
M  V30 2065 O  112.7825 41.4529 66.6809 0
M  V30 2066 C  114.1326 41.5556 69.7059 0
M  V30 2067 H  113.4307 40.7236 69.6961 0
M  V30 2068 H  115.1021 41.1154 69.4675 0
M  V30 2069 C  114.2066 42.1202 71.1371 0
M  V30 2070 H  113.2482 42.5508 71.4292 0
M  V30 2071 H  114.3704 41.2854 71.8168 0
M  V30 2072 C  115.3282 43.1477 71.3495 0
M  V30 2073 H  116.2387 42.8070 70.8548 0
M  V30 2074 H  115.0504 44.0879 70.8721 0
M  V30 2075 C  115.6065 43.3938 72.8399 0
M  V30 2076 H  114.7190 43.7866 73.3363 0
M  V30 2077 H  115.8621 42.4558 73.3338 0
M  V30 2078 N  116.7261 44.3294 73.0362 0 CHG=1
M  V30 2079 H  116.5047 45.2191 72.6132 0
M  V30 2080 H  116.8853 44.4582 74.0254 0
M  V30 2081 H  117.5604 43.9516 72.6098 0
M  V30 2082 N  115.0384 41.7367 66.7142 0
M  V30 2083 H  115.8276 42.1043 67.2258 0
M  V30 2084 C  115.3368 41.1115 65.4279 0
M  V30 2085 H  116.0961 40.3441 65.5833 0
M  V30 2086 H  114.4687 40.6166 64.9907 0
M  V30 2087 C  115.8604 42.1812 64.4637 0
M  V30 2088 O  115.4941 43.3552 64.5551 0
M  V30 2089 N  116.7252 41.7454 63.5353 0
M  V30 2090 H  116.9503 40.7607 63.5038 0
M  V30 2091 C  117.4999 42.5971 62.6223 0 CFG=2
M  V30 2092 H  117.4375 43.6318 62.9637 0
M  V30 2093 C  116.9501 42.6037 61.1834 0
M  V30 2094 O  117.4577 43.3747 60.3676 0
M  V30 2095 C  119.0060 42.2217 62.6073 0
M  V30 2096 H  119.1150 41.2621 62.0980 0
M  V30 2097 H  119.5726 42.9580 62.0359 0
M  V30 2098 C  119.6673 42.0940 63.9870 0
M  V30 2099 O  119.2062 42.7800 64.9271 0
M  V30 2100 O  120.6808 41.3660 64.0576 0 CHG=-1
M  V30 2101 N  115.9337 41.7768 60.8892 0
M  V30 2102 H  115.5456 41.1821 61.6084 0
M  V30 2103 C  115.3453 41.6240 59.5543 0 CFG=2
M  V30 2104 H  115.3487 42.6031 59.0712 0
M  V30 2105 C  113.8641 41.2278 59.6639 0
M  V30 2106 O  113.4030 40.8551 60.7429 0
M  V30 2107 C  116.1374 40.6432 58.6417 0
M  V30 2108 H  115.6052 40.4578 57.7078 0
M  V30 2109 H  117.0689 41.1402 58.3682 0
M  V30 2110 C  116.5056 39.2878 59.2644 0
M  V30 2111 O  117.5460 38.7391 58.8435 0
M  V30 2112 O  115.7020 38.7763 60.0753 0 CHG=-1
M  V30 2113 N  113.1577 41.2930 58.5237 0
M  V30 2114 H  113.6190 41.5895 57.6704 0
M  V30 2115 C  111.7491 40.9244 58.3379 0 CFG=2
M  V30 2116 H  111.2041 41.5747 59.0248 0
M  V30 2117 C  111.4055 39.4872 58.7806 0
M  V30 2118 O  110.3091 39.2820 59.2997 0
M  V30 2119 C  111.1693 41.2154 56.9160 0
M  V30 2120 H  110.3667 40.5070 56.7016 0
M  V30 2121 H  110.6894 42.1941 56.9234 0
M  V30 2122 C  112.1258 41.1976 55.7078 0
M  V30 2123 O  113.2701 41.6888 55.8255 0
M  V30 2124 O  111.6488 40.7818 54.6287 0 CHG=-1
M  V30 2125 N  112.3458 38.5402 58.6040 0
M  V30 2126 H  113.2192 38.7890 58.1615 0
M  V30 2127 C  112.2279 37.1466 59.0489 0 CFG=2
M  V30 2128 H  111.2735 36.7789 58.6653 0
M  V30 2129 C  112.1632 37.0274 60.5787 0
M  V30 2130 O  111.1400 36.5845 61.0983 0
M  V30 2131 C  113.3274 36.2067 58.4928 0
M  V30 2132 H  114.2860 36.4859 58.9336 0
M  V30 2133 H  113.1148 35.1787 58.7897 0
M  V30 2134 C  113.5101 36.2303 56.9742 0
M  V30 2135 O  112.5465 36.5904 56.2644 0
M  V30 2136 O  114.5866 35.7708 56.5374 0 CHG=-1
M  V30 2137 N  113.2472 37.4295 61.2655 0
M  V30 2138 H  114.0440 37.8059 60.7642 0
M  V30 2139 C  113.3932 37.3216 62.7209 0 CFG=2
M  V30 2140 H  113.2017 36.2806 62.9877 0
M  V30 2141 C  112.3953 38.1922 63.5111 0
M  V30 2142 O  111.9558 37.7462 64.5675 0
M  V30 2143 C  114.8276 37.6802 63.1924 0 CFG=2
M  V30 2144 H  114.8666 37.6394 64.2825 0
M  V30 2145 O  115.1894 38.9989 62.8252 0
M  V30 2146 H  115.3781 38.9990 61.8766 0
M  V30 2147 C  115.8908 36.7094 62.6558 0
M  V30 2148 H  116.8896 37.0014 62.9815 0
M  V30 2149 H  115.7098 35.6985 63.0213 0
M  V30 2150 H  115.8981 36.6647 61.5671 0
M  V30 2151 N  112.0109 39.3660 62.9808 0
M  V30 2152 H  112.4245 39.6780 62.1110 0
M  V30 2153 C  111.0038 40.2506 63.5752 0 CFG=2
M  V30 2154 H  111.2567 40.3690 64.6307 0
M  V30 2155 C  109.5769 39.6573 63.5185 0
M  V30 2156 O  108.8369 39.8039 64.4916 0
M  V30 2157 C  111.0393 41.6656 62.9186 0 CFG=2
M  V30 2158 H  111.0587 41.5122 61.8383 0
M  V30 2159 C  112.3377 42.4123 63.3083 0
M  V30 2160 H  112.2613 42.7698 64.3358 0
M  V30 2161 H  113.1757 41.7171 63.3054 0
M  V30 2162 C  109.8212 42.5644 63.2123 0
M  V30 2163 H  109.9214 43.5307 62.7231 0
M  V30 2164 H  108.8996 42.1320 62.8317 0
M  V30 2165 H  109.6991 42.7383 64.2817 0
M  V30 2166 C  112.7071 43.5844 62.3844 0
M  V30 2167 H  113.7176 43.4614 61.9945 0
M  V30 2168 H  112.0371 43.6661 61.5284 0
M  V30 2169 H  112.6828 44.5311 62.9223 0
M  V30 2170 N  109.2291 38.9788 62.4087 0
M  V30 2171 H  109.8865 38.8994 61.6443 0
M  V30 2172 C  107.9467 38.2891 62.2295 0 CFG=2
M  V30 2173 H  107.1687 38.9583 62.5983 0
M  V30 2174 C  107.8512 36.9918 63.0581 0
M  V30 2175 O  106.7733 36.6972 63.5745 0
M  V30 2176 C  107.6974 38.0620 60.7183 0
M  V30 2177 H  107.7387 39.0267 60.2100 0
M  V30 2178 H  108.5260 37.4762 60.3166 0
M  V30 2179 C  106.3715 37.3615 60.3324 0
M  V30 2180 H  106.3771 36.3755 60.7924 0
M  V30 2181 C  105.1243 38.1049 60.8589 0
M  V30 2182 H  104.3168 38.1353 60.1297 0
M  V30 2183 H  104.7264 37.6109 61.7457 0
M  V30 2184 H  105.3438 39.1371 61.1295 0
M  V30 2185 C  106.3017 37.1069 58.8107 0
M  V30 2186 H  106.1572 36.0464 58.6031 0
M  V30 2187 H  105.4847 37.6428 58.3279 0
M  V30 2188 H  107.2184 37.4093 58.3026 0
M  V30 2189 N  108.9763 36.2685 63.2073 0
M  V30 2190 H  109.8170 36.5596 62.7250 0
M  V30 2191 C  109.0968 35.0757 64.0569 0 CFG=2
M  V30 2192 H  108.2657 34.4216 63.7905 0
M  V30 2193 C  108.9877 35.4208 65.5531 0
M  V30 2194 O  108.3184 34.6894 66.2826 0
M  V30 2195 C  110.4212 34.3361 63.7524 0
M  V30 2196 H  111.2670 35.0128 63.8838 0
M  V30 2197 H  110.5601 33.5276 64.4717 0
M  V30 2198 C  110.4856 33.6948 62.3591 0
M  V30 2199 O  109.4638 33.4388 61.7242 0
M  V30 2200 N  111.7005 33.4156 61.8825 0
M  V30 2201 H  111.7981 32.9940 60.9701 0
M  V30 2202 H  112.5275 33.6316 62.4192 0
M  V30 2203 N  109.5913 36.5512 65.9650 0
M  V30 2204 H  110.1476 37.0807 65.3063 0
M  V30 2205 C  109.4593 37.1370 67.3035 0 CFG=2
M  V30 2206 H  109.6686 36.3181 67.9947 0
M  V30 2207 C  108.0388 37.6569 67.5793 0
M  V30 2208 O  107.6147 37.5882 68.7328 0
M  V30 2209 C  110.5166 38.2583 67.4765 0
M  V30 2210 H  110.5181 38.9192 66.6087 0
M  V30 2211 H  110.2528 38.8960 68.3186 0
M  V30 2212 C  111.9373 37.7503 67.7643 0
M  V30 2213 O  112.1361 36.6350 68.2411 0
M  V30 2214 N  112.9424 38.5853 67.5026 0
M  V30 2215 H  113.8932 38.3006 67.6860 0
M  V30 2216 H  112.7631 39.5017 67.1113 0
M  V30 2217 N  107.3158 38.1232 66.5423 0
M  V30 2218 H  107.7240 38.1712 65.6189 0
M  V30 2219 C  105.9173 38.5272 66.6709 0 CFG=2
M  V30 2220 H  105.8664 39.1664 67.5524 0
M  V30 2221 C  104.9760 37.3450 66.9417 0
M  V30 2222 O  104.2328 37.4105 67.9141 0
M  V30 2223 C  105.4331 39.3944 65.4871 0
M  V30 2224 H  105.9769 40.3391 65.4582 0
M  V30 2225 H  105.6535 38.8938 64.5448 0
M  V30 2226 C  103.9378 39.6799 65.5461 0
M  V30 2227 C  103.4090 40.4373 66.6131 0
M  V30 2228 H  104.0700 40.8649 67.3518 0
M  V30 2229 C  103.0624 39.0880 64.6128 0
M  V30 2230 H  103.4512 38.4838 63.8064 0
M  V30 2231 C  102.0180 40.6100 66.7452 0
M  V30 2232 H  101.6253 41.1873 67.5694 0
M  V30 2233 C  101.6713 39.2396 64.7606 0
M  V30 2234 H  101.0034 38.7596 64.0632 0
M  V30 2235 C  101.1469 40.0028 65.8210 0
M  V30 2236 O  99.7964 40.1374 65.9595 0
M  V30 2237 H  99.5429 40.6725 66.7145 0
M  V30 2238 N  104.9932 36.3053 66.0922 0
M  V30 2239 H  105.6225 36.3000 65.3000 0
M  V30 2240 C  104.0549 35.1814 66.2084 0 CFG=2
M  V30 2241 H  103.0619 35.6150 66.3461 0
M  V30 2242 C  104.2933 34.2827 67.4409 0
M  V30 2243 O  103.3699 33.5779 67.8461 0
M  V30 2244 C  103.9978 34.4114 64.8774 0
M  V30 2245 H  103.1456 33.7306 64.9080 0
M  V30 2246 H  103.7689 35.1267 64.0880 0
M  V30 2247 C  105.2472 33.5902 64.5070 0
M  V30 2248 H  106.1393 34.2081 64.5862 0
M  V30 2249 H  105.3748 32.7802 65.2256 0
M  V30 2250 C  105.1433 32.9902 63.0941 0
M  V30 2251 H  105.8323 32.1494 63.0076 0
M  V30 2252 H  104.1445 32.5704 62.9618 0
M  V30 2253 C  105.4328 34.0050 61.9746 0
M  V30 2254 H  105.0078 34.9796 62.2111 0
M  V30 2255 H  106.5080 34.1468 61.8627 0
M  V30 2256 N  104.8465 33.5782 60.6926 0 CHG=1
M  V30 2257 H  105.1870 32.6628 60.4381 0
M  V30 2258 H  103.8386 33.5545 60.8030 0
M  V30 2259 H  105.0762 34.2441 59.9694 0
M  V30 2260 N  105.4897 34.3770 68.0478 0
M  V30 2261 H  106.2017 34.9647 67.6372 0
M  V30 2262 C  105.8277 33.7710 69.3345 0 CFG=2
M  V30 2263 H  105.4369 32.7517 69.3505 0
M  V30 2264 C  105.2413 34.5191 70.5505 0
M  V30 2265 O  105.0819 33.8913 71.5968 0
M  V30 2266 C  107.3585 33.6977 69.4470 0
M  V30 2267 H  107.6670 33.2366 70.3862 0
M  V30 2268 H  107.7819 33.1012 68.6381 0
M  V30 2269 H  107.8117 34.6892 69.3986 0
M  V30 2270 N  104.9466 35.8250 70.4056 0
M  V30 2271 H  105.0938 36.2686 69.5090 0
M  V30 2272 C  104.5059 36.7086 71.4936 0 CFG=2
M  V30 2273 H  104.5376 36.1644 72.4388 0
M  V30 2274 C  103.0410 37.1674 71.3231 0
M  V30 2275 O  102.4355 37.5784 72.3101 0
M  V30 2276 C  105.4580 37.9478 71.5950 0 CFG=2
M  V30 2277 H  106.4057 37.6158 71.1702 0
M  V30 2278 C  105.8176 38.3100 73.0509 0
M  V30 2279 H  106.0498 37.3945 73.5928 0
M  V30 2280 H  106.7484 38.8699 73.0360 0
M  V30 2281 C  105.1069 39.2008 70.7595 0
M  V30 2282 H  105.8931 39.9519 70.8408 0
M  V30 2283 H  105.0137 38.9584 69.7056 0
M  V30 2284 H  104.1757 39.6727 71.0672 0
M  V30 2285 C  104.7833 39.1178 73.8503 0
M  V30 2286 H  105.2348 39.5121 74.7586 0
M  V30 2287 H  104.4065 39.9752 73.2969 0
M  V30 2288 H  103.9398 38.5017 74.1563 0
M  V30 2289 N  102.4820 37.0584 70.1048 0
M  V30 2290 H  103.0527 36.7226 69.3402 0
M  V30 2291 C  101.1268 37.4762 69.7360 0 CFG=2
M  V30 2292 H  101.1009 38.5527 69.9107 0
M  V30 2293 C  99.9465 36.8857 70.5441 0
M  V30 2294 O  98.9954 37.6371 70.7658 0
M  V30 2295 C  100.9117 37.2801 68.2266 0
M  V30 2296 H  99.9216 37.6166 67.9165 0
M  V30 2297 H  101.6388 37.8515 67.6518 0
M  V30 2298 H  101.0145 36.2357 67.9322 0
M  V30 2299 N  100.0238 35.6220 71.0399 0
M  V30 2300 C  99.0095 35.0763 71.9670 0 CFG=2
M  V30 2301 H  98.0453 35.1225 71.4569 0
M  V30 2302 C  98.8876 35.7896 73.3279 0
M  V30 2303 O  97.8142 35.7295 73.9241 0
M  V30 2304 C  99.4101 33.6002 72.1414 0
M  V30 2305 H  100.0535 33.4747 73.0150 0
M  V30 2306 H  98.5495 32.9434 72.2712 0
M  V30 2307 C  100.2017 33.2683 70.8895 0
M  V30 2308 H  100.8586 32.4056 71.0048 0
M  V30 2309 H  99.5160 33.0646 70.0657 0
M  V30 2310 C  100.9497 34.5644 70.6209 0
M  V30 2311 H  101.8458 34.6019 71.2410 0
M  V30 2312 H  101.2507 34.6299 69.5756 0
M  V30 2313 N  99.9699 36.4423 73.7859 0
M  V30 2314 H  100.8196 36.4340 73.2385 0
M  V30 2315 C  100.0387 37.1763 75.0553 0 CFG=2
M  V30 2316 H  99.1988 36.8779 75.6843 0
M  V30 2317 C  99.8950 38.6923 74.8514 0
M  V30 2318 O  99.2825 39.3479 75.6937 0
M  V30 2319 C  101.3244 36.8719 75.8638 0
M  V30 2320 H  102.1850 37.2508 75.3109 0
M  V30 2321 H  101.2789 37.3982 76.8143 0
M  V30 2322 C  101.5845 35.3928 76.1738 0
M  V30 2323 O  100.6668 34.5677 75.9672 0
M  V30 2324 O  102.6843 35.1218 76.7002 0 CHG=-1
M  V30 2325 N  100.4359 39.2175 73.7376 0
M  V30 2326 H  100.9362 38.6081 73.1034 0
M  V30 2327 C  100.4296 40.6400 73.3794 0 CFG=2
M  V30 2328 H  100.7841 41.1815 74.2577 0
M  V30 2329 C  99.0278 41.1912 73.0442 0
M  V30 2330 O  98.8330 42.4024 73.1225 0
M  V30 2331 C  101.4259 40.8510 72.2134 0
M  V30 2332 H  102.3077 40.2373 72.3871 0
M  V30 2333 H  100.9776 40.4642 71.2972 0
M  V30 2334 C  101.9092 42.3029 71.9837 0
M  V30 2335 H  101.0302 42.9230 71.8113 0
M  V30 2336 C  102.6435 42.8791 73.2146 0
M  V30 2337 H  103.5686 43.3915 72.9524 0
M  V30 2338 H  102.0140 43.6050 73.7301 0
M  V30 2339 H  102.9062 42.1055 73.9367 0
M  V30 2340 C  102.7616 42.4052 70.6995 0
M  V30 2341 H  102.4240 43.2332 70.0760 0
M  V30 2342 H  103.8191 42.5670 70.9089 0
M  V30 2343 H  102.6976 41.5021 70.0913 0
M  V30 2344 N  98.0801 40.3031 72.6961 0
M  V30 2345 H  98.3268 39.3261 72.6226 0
M  V30 2346 C  96.6686 40.6275 72.4881 0 CFG=2
M  V30 2347 H  96.6260 41.5905 71.9760 0
M  V30 2348 C  95.8634 40.7955 73.7903 0
M  V30 2349 O  94.8800 41.5333 73.7713 0
M  V30 2350 C  96.0175 39.5426 71.5878 0
M  V30 2351 H  96.5464 38.5969 71.7153 0
M  V30 2352 H  95.0009 39.3208 71.9183 0
M  V30 2353 C  95.9644 39.8845 70.0807 0
M  V30 2354 H  96.9719 40.0644 69.7080 0
M  V30 2355 H  95.5950 39.0163 69.5343 0
M  V30 2356 C  95.0694 41.0766 69.7019 0
M  V30 2357 O  95.1881 41.6103 68.6016 0
M  V30 2358 N  94.1687 41.5029 70.5903 0
M  V30 2359 H  93.5796 42.3009 70.3878 0
M  V30 2360 H  94.0907 41.0632 71.4962 0
M  V30 2361 N  96.2562 40.0886 74.8665 0
M  V30 2362 H  97.1081 39.5473 74.8173 0
M  V30 2363 C  95.4594 39.9206 76.0906 0 CFG=2
M  V30 2364 H  94.4153 39.8379 75.7839 0
M  V30 2365 C  95.4930 41.1024 77.0807 0
M  V30 2366 O  94.7408 41.0700 78.0550 0
M  V30 2367 C  95.8242 38.5830 76.7717 0
M  V30 2368 H  96.8743 38.5670 77.0675 0
M  V30 2369 H  95.2475 38.4997 77.6938 0
M  V30 2370 C  95.4888 37.3606 75.8932 0
M  V30 2371 H  94.4999 37.4489 75.4421 0
M  V30 2372 H  96.1947 37.3652 75.0637 0
M  V30 2373 C  95.5777 36.0119 76.6281 0
M  V30 2374 H  95.1808 36.1947 77.6259 0
M  V30 2375 H  94.9388 35.2426 76.1937 0
M  V30 2376 N  96.9597 35.5608 76.8575 0
M  V30 2377 H  97.6106 35.7575 76.1074 0
M  V30 2378 C  97.3728 34.7629 77.8598 0
M  V30 2379 N  96.5395 34.3674 78.8332 0
M  V30 2380 H  96.8643 33.7664 79.5763 0
M  V30 2381 H  95.5768 34.6705 78.8246 0
M  V30 2382 N  98.6421 34.3408 77.8914 0 CHG=1
M  V30 2383 H  98.9674 33.7489 78.6408 0
M  V30 2384 H  99.2922 34.5623 77.1376 0
M  V30 2385 N  96.3067 42.1349 76.8098 0
M  V30 2386 H  96.8863 42.0974 75.9840 0
M  V30 2387 C  96.3033 43.4125 77.5317 0 CFG=2
M  V30 2388 H  96.2358 43.1757 78.5959 0
M  V30 2389 C  95.0545 44.2594 77.2021 0
M  V30 2390 O  94.4840 44.1265 76.1178 0
M  V30 2391 C  97.6507 44.1594 77.3374 0
M  V30 2392 H  97.5480 45.2106 77.6123 0
M  V30 2393 H  98.3334 43.7521 78.0803 0
M  V30 2394 C  98.3395 44.0292 75.9547 0
M  V30 2395 H  98.3718 42.9778 75.6720 0
M  V30 2396 C  97.5620 44.7758 74.8570 0
M  V30 2397 H  98.2122 45.3105 74.1655 0
M  V30 2398 H  96.9664 44.0795 74.2657 0
M  V30 2399 H  96.8777 45.5068 75.2833 0
M  V30 2400 C  99.8217 44.4524 76.0190 0
M  V30 2401 H  100.4736 43.5828 75.9293 0
M  V30 2402 H  100.1073 45.1333 75.2187 0
M  V30 2403 H  100.0622 44.9402 76.9634 0
M  V30 2404 N  94.6258 45.0645 78.1918 0
M  V30 2405 H  95.1650 45.0893 79.0531 0
M  V30 2406 C  93.3393 45.7768 78.2656 0 CFG=2
M  V30 2407 H  93.3816 46.3296 79.2034 0
M  V30 2408 C  92.1602 44.7813 78.4224 0
M  V30 2409 O  91.0526 45.0495 77.9588 0
M  V30 2410 C  93.1515 46.7932 77.1014 0
M  V30 2411 H  94.1033 47.2901 76.9153 0
M  V30 2412 H  92.8806 46.2411 76.2010 0
M  V30 2413 C  92.0878 47.8851 77.3054 0
M  V30 2414 O  91.6437 48.0865 78.4574 0
M  V30 2415 O  91.7680 48.5435 76.2907 0 CHG=-1
M  V30 2416 N  92.4238 43.6179 79.0473 0
M  V30 2417 H  93.3533 43.4643 79.4131 0
M  V30 2418 C  91.4688 42.5152 79.1900 0
M  V30 2419 H  91.8927 41.7751 79.8688 0
M  V30 2420 H  90.5490 42.8803 79.6495 0
M  V30 2421 C  91.1400 41.8251 77.8508 0
M  V30 2422 O  90.1318 41.1245 77.7741 0
M  V30 2423 N  91.9583 42.0381 76.8042 0
M  V30 2424 H  92.7768 42.6157 76.9392 0
M  V30 2425 C  91.7387 41.5285 75.4519 0
M  V30 2426 H  92.7056 41.3005 75.0126 0
M  V30 2427 H  91.1764 40.5936 75.4648 0
M  V30 2428 C  91.0206 42.5475 74.5508 0
M  V30 2429 O  90.7442 42.2178 73.3980 0
M  V30 2430 N  90.7136 43.7611 75.0488 0
M  V30 2431 H  90.9678 43.9838 76.0013 0
M  V30 2432 C  89.9854 44.8056 74.3150 0 CFG=2
M  V30 2433 H  89.1561 44.3268 73.7902 0
M  V30 2434 C  90.8401 45.5284 73.2459 0
M  V30 2435 O  90.2700 46.0640 72.2935 0
M  V30 2436 C  89.3843 45.8607 75.2859 0 CFG=2
M  V30 2437 H  90.1943 46.3453 75.8275 0
M  V30 2438 O  88.5764 45.2115 76.2493 0
M  V30 2439 H  89.1544 44.7507 76.8642 0
M  V30 2440 C  88.5256 46.9616 74.6421 0
M  V30 2441 H  88.0212 47.5583 75.4025 0
M  V30 2442 H  89.1370 47.6472 74.0581 0
M  V30 2443 H  87.7611 46.5427 73.9873 0
M  V30 2444 N  92.1796 45.4931 73.3862 0
M  V30 2445 H  92.5796 45.0217 74.1849 0
M  V30 2446 C  93.1362 46.0074 72.3997 0 CFG=2
M  V30 2447 H  92.8409 47.0393 72.2080 0
M  V30 2448 C  93.0809 45.2496 71.0579 0
M  V30 2449 O  92.8261 44.0460 71.0345 0
M  V30 2450 C  94.5917 46.0046 72.9701 0
M  V30 2451 H  94.6750 45.1561 73.6501 0
M  V30 2452 C  95.7564 45.8680 71.9621 0
M  V30 2453 H  96.7174 45.9587 72.4634 0
M  V30 2454 H  95.7576 44.8970 71.4654 0
M  V30 2455 H  95.7231 46.6464 71.1994 0
M  V30 2456 C  94.8193 47.2725 73.8027 0
M  V30 2457 H  95.7525 47.2255 74.3607 0
M  V30 2458 H  94.8731 48.1532 73.1637 0
M  V30 2459 H  94.0124 47.4334 74.5146 0
M  V30 2460 N  93.3460 45.9937 69.9753 0
M  V30 2461 H  93.5314 46.9815 70.0950 0
M  V30 2462 C  93.4154 45.5048 68.6043 0 CFG=2
M  V30 2463 H  93.2017 44.4353 68.5500 0
M  V30 2464 C  94.8438 45.7625 68.1039 0
M  V30 2465 O  95.2235 46.9248 67.9534 0
M  V30 2466 C  92.3811 46.2728 67.7462 0
M  V30 2467 H  92.6591 47.3258 67.6941 0
M  V30 2468 H  92.4124 45.9019 66.7207 0
M  V30 2469 C  90.9355 46.1944 68.2733 0
M  V30 2470 H  90.5991 45.1570 68.2736 0
M  V30 2471 H  90.8987 46.5260 69.3115 0
M  V30 2472 C  89.9629 47.0599 67.4603 0
M  V30 2473 H  90.3845 48.0575 67.3270 0
M  V30 2474 H  89.8531 46.6368 66.4608 0
M  V30 2475 C  88.5869 47.1691 68.1314 0
M  V30 2476 H  88.1338 46.1833 68.2405 0
M  V30 2477 H  88.6902 47.5890 69.1330 0
M  V30 2478 N  87.6797 48.0328 67.3580 0 CHG=1
M  V30 2479 H  87.5184 47.6303 66.4460 0
M  V30 2480 H  86.8026 48.1198 67.8527 0
M  V30 2481 H  88.0935 48.9483 67.2556 0
M  V30 2482 N  95.6180 44.6906 67.8609 0
M  V30 2483 H  95.2687 43.7542 68.0161 0
M  V30 2484 C  96.9554 44.8026 67.2757 0 CFG=2
M  V30 2485 H  97.4401 45.6976 67.6664 0
M  V30 2486 C  96.8456 44.9518 65.7494 0
M  V30 2487 O  96.4490 44.0032 65.0725 0
M  V30 2488 C  97.8351 43.5807 67.6367 0
M  V30 2489 H  97.3685 42.6772 67.2404 0
M  V30 2490 H  98.7867 43.6751 67.1098 0
M  V30 2491 C  98.1446 43.3641 69.1377 0
M  V30 2492 H  97.1950 43.1645 69.6341 0
M  V30 2493 C  99.0167 42.1061 69.3210 0
M  V30 2494 H  98.7017 41.5419 70.1959 0
M  V30 2495 H  98.9509 41.4329 68.4666 0
M  V30 2496 H  100.0708 42.3492 69.4506 0
M  V30 2497 C  98.7639 44.5874 69.8435 0
M  V30 2498 H  99.6703 44.3407 70.3955 0
M  V30 2499 H  99.0241 45.3813 69.1493 0
M  V30 2500 H  98.0653 45.0080 70.5648 0
M  V30 2501 N  97.2375 46.1324 65.2505 0
M  V30 2502 H  97.5397 46.8579 65.8879 0
M  V30 2503 C  97.4596 46.4157 63.8327 0 CFG=2
M  V30 2504 H  97.2691 45.5267 63.2285 0
M  V30 2505 C  98.9347 46.8008 63.6255 0
M  V30 2506 O  99.7216 46.7341 64.5688 0
M  V30 2507 C  96.4976 47.5272 63.3829 0
M  V30 2508 H  96.5403 47.6706 62.3038 0
M  V30 2509 H  95.4655 47.2801 63.6334 0
M  V30 2510 H  96.7361 48.4810 63.8501 0
M  V30 2511 N  99.2907 47.1755 62.3911 0
M  V30 2512 H  98.5884 47.2261 61.6655 0
M  V30 2513 C  100.6608 47.4667 61.9713 0
M  V30 2514 H  100.7029 48.4807 61.5734 0
M  V30 2515 H  101.3752 47.4124 62.7946 0
M  V30 2516 C  101.0553 46.4758 60.8704 0
M  V30 2517 O  100.2049 45.7871 60.3034 0
M  V30 2518 N  102.3602 46.4245 60.5602 0
M  V30 2519 H  103.0152 47.0130 61.0600 0
M  V30 2520 C  102.9310 45.5900 59.4994 0 CFG=2
M  V30 2521 H  102.2689 45.6466 58.6340 0
M  V30 2522 C  103.0424 44.1015 59.8745 0
M  V30 2523 O  102.8578 43.2652 58.9934 0
M  V30 2524 C  104.3157 46.1424 59.0935 0
M  V30 2525 H  104.9464 46.1791 59.9838 0
M  V30 2526 H  104.8089 45.4442 58.4146 0
M  V30 2527 C  104.2791 47.5358 58.4212 0
M  V30 2528 H  103.7296 48.2073 59.0813 0
M  V30 2529 C  105.6990 48.1291 58.2986 0
M  V30 2530 H  106.0310 48.2197 57.2644 0
M  V30 2531 H  105.7394 49.1248 58.7410 0
M  V30 2532 H  106.4434 47.5219 58.8147 0
M  V30 2533 C  103.5266 47.5222 57.0721 0
M  V30 2534 H  104.0558 48.0613 56.2866 0
M  V30 2535 H  103.3599 46.5089 56.7059 0
M  V30 2536 H  102.5489 47.9938 57.1746 0
M  V30 2537 N  103.3465 43.7883 61.1453 0
M  V30 2538 H  103.4733 44.5244 61.8275 0
M  V30 2539 C  103.5506 42.4124 61.6159 0 CFG=2
M  V30 2540 H  104.0407 41.8731 60.8056 0
M  V30 2541 C  102.2732 41.5788 61.8677 0
M  V30 2542 O  102.2920 40.4011 61.5089 0
M  V30 2543 C  104.5391 42.3860 62.8069 0
M  V30 2544 H  104.4506 43.3153 63.3683 0
M  V30 2545 H  104.2558 41.6022 63.5089 0
M  V30 2546 C  106.0287 42.1660 62.4611 0
M  V30 2547 H  106.6334 42.3351 63.3529 0
M  V30 2548 H  106.1779 41.1195 62.1970 0
M  V30 2549 C  106.5611 43.0053 61.2940 0
M  V30 2550 O  106.3852 42.6502 60.1312 0
M  V30 2551 N  107.2334 44.1147 61.5961 0
M  V30 2552 H  107.6101 44.6887 60.8563 0
M  V30 2553 H  107.3849 44.3761 62.5590 0
M  V30 2554 N  101.1740 42.1714 62.3949 0
M  V30 2555 C  99.8692 41.4848 62.4913 0 CFG=2
M  V30 2556 H  100.0147 40.5834 63.0832 0
M  V30 2557 C  99.2335 41.0766 61.1508 0
M  V30 2558 O  98.7006 39.9702 61.0629 0
M  V30 2559 C  98.9951 42.4557 63.3006 0
M  V30 2560 H  98.4664 43.1476 62.6426 0
M  V30 2561 H  98.2546 41.9454 63.9176 0
M  V30 2562 C  99.9924 43.2327 64.1354 0
M  V30 2563 H  99.5951 44.1642 64.5288 0
M  V30 2564 H  100.3113 42.6298 64.9848 0
M  V30 2565 C  101.1550 43.4102 63.1712 0
M  V30 2566 H  100.9607 44.2448 62.5024 0
M  V30 2567 H  102.0843 43.6044 63.7036 0
M  V30 2568 N  99.3265 41.9470 60.1303 0
M  V30 2569 H  99.7667 42.8458 60.2677 0
M  V30 2570 C  98.8398 41.6576 58.7779 0 CFG=2
M  V30 2571 H  97.8789 41.1460 58.8675 0
M  V30 2572 C  99.7797 40.7187 57.9884 0
M  V30 2573 O  99.2793 39.9553 57.1645 0
M  V30 2574 C  98.5999 42.9484 57.9472 0
M  V30 2575 H  98.2045 42.6372 56.9798 0
M  V30 2576 C  97.5071 43.8355 58.5701 0
M  V30 2577 H  97.2936 44.7006 57.9417 0
M  V30 2578 H  96.5738 43.2853 58.6881 0
M  V30 2579 H  97.8024 44.2087 59.5512 0
M  V30 2580 C  99.8698 43.7661 57.6519 0
M  V30 2581 H  99.6299 44.7373 57.2205 0
M  V30 2582 H  100.4225 43.9540 58.5666 0
M  V30 2583 H  100.5358 43.2550 56.9564 0
M  V30 2584 N  101.0970 40.7449 58.2756 0
M  V30 2585 H  101.4496 41.4107 58.9492 0
M  V30 2586 C  102.0832 39.8213 57.7023 0 CFG=2
M  V30 2587 H  101.9242 39.7902 56.6240 0
M  V30 2588 C  101.9444 38.3877 58.2398 0
M  V30 2589 O  102.1529 37.4434 57.4798 0
M  V30 2590 C  103.5067 40.3448 57.9378 0
M  V30 2591 H  104.2514 39.6602 57.5302 0
M  V30 2592 H  103.6568 41.3062 57.4470 0
M  V30 2593 H  103.7206 40.4684 58.9990 0
M  V30 2594 N  101.5560 38.2496 59.5196 0
M  V30 2595 H  101.4339 39.0745 60.0919 0
M  V30 2596 C  101.2229 36.9743 60.1556 0 CFG=2
M  V30 2597 H  102.0503 36.2961 59.9446 0
M  V30 2598 C  99.9593 36.3299 59.5581 0
M  V30 2599 O  99.9274 35.1104 59.4065 0
M  V30 2600 C  101.1495 37.1760 61.6895 0
M  V30 2601 H  102.1511 37.4067 62.0535 0
M  V30 2602 H  100.5593 38.0702 61.8921 0
M  V30 2603 C  100.5694 36.0261 62.5524 0
M  V30 2604 H  100.5874 36.3324 63.5988 0
M  V30 2605 H  99.5179 35.8689 62.3107 0
M  V30 2606 C  101.2931 34.6764 62.4641 0
M  V30 2607 O  102.3408 34.5972 61.7864 0
M  V30 2608 O  100.7830 33.7304 63.1013 0 CHG=-1
M  V30 2609 N  98.9687 37.1597 59.1885 0
M  V30 2610 H  99.0607 38.1514 59.3587 0
M  V30 2611 C  97.7591 36.7295 58.4911 0 CFG=2
M  V30 2612 H  97.3650 35.8544 59.0121 0
M  V30 2613 C  98.0195 36.3180 57.0299 0
M  V30 2614 O  97.4312 35.3330 56.5907 0
M  V30 2615 C  96.7016 37.8366 58.5871 0
M  V30 2616 H  95.7824 37.5569 58.0717 0
M  V30 2617 H  96.4434 38.0310 59.6280 0
M  V30 2618 H  97.0594 38.7708 58.1556 0
M  V30 2619 N  98.9074 37.0474 56.3261 0
M  V30 2620 H  99.3256 37.8567 56.7650 0
M  V30 2621 C  99.3337 36.7850 54.9443 0 CFG=2
M  V30 2622 H  98.4343 36.7010 54.3320 0
M  V30 2623 C  100.1074 35.4620 54.7933 0
M  V30 2624 O  99.7608 34.6634 53.9227 0
M  V30 2625 C  100.1865 37.9717 54.4326 0
M  V30 2626 H  100.8475 38.2859 55.2390 0
M  V30 2627 H  100.8537 37.6521 53.6297 0
M  V30 2628 C  99.3692 39.1795 53.9211 0
M  V30 2629 H  98.5392 39.3267 54.6126 0
M  V30 2630 C  100.1974 40.4830 53.9347 0
M  V30 2631 H  99.8106 41.1753 54.6830 0
M  V30 2632 H  101.2452 40.3029 54.1758 0
M  V30 2633 H  100.1771 41.0081 52.9800 0
M  V30 2634 C  98.7676 38.8904 52.5294 0
M  V30 2635 H  97.7163 39.1687 52.4798 0
M  V30 2636 H  99.2834 39.4258 51.7325 0
M  V30 2637 H  98.8295 37.8320 52.2819 0
M  V30 2638 N  101.1221 35.2461 55.6484 0
M  V30 2639 H  101.3609 35.9569 56.3272 0
M  V30 2640 C  101.9056 34.0049 55.7016 0 CFG=2
M  V30 2641 H  102.1522 33.7111 54.6793 0
M  V30 2642 C  101.1267 32.8352 56.3452 0
M  V30 2643 O  101.4360 31.6817 56.0458 0
M  V30 2644 C  103.2362 34.1961 56.4828 0 CFG=2
M  V30 2645 H  103.7740 33.2476 56.4889 0
M  V30 2646 O  103.0303 34.5331 57.8445 0
M  V30 2647 H  102.7108 35.4395 57.8899 0
M  V30 2648 C  104.1687 35.2354 55.8408 0
M  V30 2649 H  105.0977 35.3310 56.4035 0
M  V30 2650 H  104.4335 34.9398 54.8252 0
M  V30 2651 H  103.7124 36.2229 55.7851 0
M  V30 2652 N  100.1095 33.1414 57.1691 0
M  V30 2653 H  99.9240 34.1125 57.3789 0
M  V30 2654 C  99.2574 32.1615 57.8395 0
M  V30 2655 H  99.8743 31.4335 58.3690 0
M  V30 2656 H  98.6597 32.6779 58.5910 0
M  V30 2657 C  98.3085 31.4360 56.8713 0
M  V30 2658 O  97.8642 30.3372 57.2007 0
M  V30 2659 N  98.0215 32.0144 55.6868 0
M  V30 2660 H  98.4101 32.9226 55.4757 0
M  V30 2661 C  97.1599 31.4249 54.6541 0 CFG=2
M  V30 2662 H  96.1901 31.2342 55.1184 0
M  V30 2663 C  97.6857 30.0821 54.1065 0
M  V30 2664 O  96.8777 29.1763 53.9198 0
M  V30 2665 C  96.9303 32.3747 53.4419 0 CFG=2
M  V30 2666 H  96.1771 31.9166 52.7978 0
M  V30 2667 O  98.0844 32.5556 52.6382 0
M  V30 2668 H  98.6591 33.2004 53.0635 0
M  V30 2669 C  96.4026 33.7560 53.8419 0
M  V30 2670 H  96.0888 34.3245 52.9676 0
M  V30 2671 H  95.5493 33.6723 54.5152 0
M  V30 2672 H  97.1676 34.3420 54.3420 0
M  V30 2673 N  99.0122 29.9642 53.9130 0
M  V30 2674 H  99.6038 30.7560 54.1192 0
M  V30 2675 C  99.6871 28.8010 53.3274 0 CFG=2
M  V30 2676 H  99.2299 28.6331 52.3513 0
M  V30 2677 C  99.4900 27.4991 54.1342 0
M  V30 2678 O  99.3508 26.4369 53.5275 0
M  V30 2679 C  101.2131 29.0836 53.1379 0 CFG=2
M  V30 2680 H  101.5924 29.4100 54.1080 0
M  V30 2681 C  101.4711 30.2671 52.1719 0
M  V30 2682 H  100.9266 31.1507 52.5065 0
M  V30 2683 H  102.5234 30.5467 52.2354 0
M  V30 2684 C  102.0798 27.8681 52.7332 0
M  V30 2685 H  103.1092 28.1703 52.5372 0
M  V30 2686 H  102.1240 27.1132 53.5184 0
M  V30 2687 H  101.6983 27.3873 51.8324 0
M  V30 2688 C  101.1312 29.9991 50.6948 0
M  V30 2689 H  100.6233 30.8563 50.2520 0
M  V30 2690 H  102.0379 29.8202 50.1171 0
M  V30 2691 H  100.4848 29.1330 50.5579 0
M  V30 2692 N  99.4292 27.6159 55.4728 0
M  V30 2693 H  99.5323 28.5288 55.8923 0
M  V30 2694 C  99.1485 26.5126 56.3917 0 CFG=2
M  V30 2695 H  99.8151 25.6860 56.1369 0
M  V30 2696 C  97.7016 25.9956 56.2958 0
M  V30 2697 O  97.4994 24.7828 56.3630 0
M  V30 2698 C  99.4742 26.9592 57.8246 0
M  V30 2699 H  99.3014 26.1531 58.5388 0
M  V30 2700 H  100.5201 27.2548 57.9138 0
M  V30 2701 H  98.8627 27.8098 58.1289 0
M  V30 2702 N  96.7318 26.9119 56.1155 0
M  V30 2703 H  96.9738 27.8913 56.0597 0
M  V30 2704 C  95.3144 26.5787 55.9437 0 CFG=2
M  V30 2705 H  95.0637 25.8260 56.6943 0
M  V30 2706 C  95.0102 25.9627 54.5631 0
M  V30 2707 O  94.1644 25.0744 54.4978 0
M  V30 2708 C  94.3693 27.7948 56.1790 0 CFG=2
M  V30 2709 H  93.3695 27.3827 56.3241 0
M  V30 2710 O  94.2367 28.6704 55.0720 0
M  V30 2711 H  95.1057 29.0088 54.8335 0
M  V30 2712 C  94.6843 28.6002 57.4472 0
M  V30 2713 H  93.9359 29.3752 57.6154 0
M  V30 2714 H  94.6964 27.9564 58.3269 0
M  V30 2715 H  95.6526 29.0909 57.3806 0
M  V30 2716 N  95.7215 26.4072 53.5102 0
M  V30 2717 H  96.3819 27.1616 53.6438 0
M  V30 2718 C  95.6095 25.8878 52.1423 0 CFG=2
M  V30 2719 H  94.5449 25.7986 51.9270 0
M  V30 2720 C  96.1922 24.4771 52.0025 0
M  V30 2721 O  95.5709 23.6434 51.3442 0
M  V30 2722 C  96.2231 26.8136 51.0673 0
M  V30 2723 H  97.3104 26.7839 51.1591 0
M  V30 2724 H  95.9650 26.4419 50.0768 0
M  V30 2725 C  95.7904 28.2781 51.1395 0
M  V30 2726 O  94.6338 28.5285 51.5447 0
M  V30 2727 O  96.5911 29.1239 50.6882 0 CHG=-1
M  V30 2728 N  97.3364 24.2310 52.6662 0
M  V30 2729 H  97.7877 24.9874 53.1633 0
M  V30 2730 C  97.9724 22.9197 52.7929 0 CFG=2
M  V30 2731 H  98.1401 22.5513 51.7789 0
M  V30 2732 C  97.0751 21.8959 53.5110 0
M  V30 2733 O  97.0139 20.7508 53.0728 0
M  V30 2734 C  99.3500 23.0884 53.4798 0
M  V30 2735 H  99.9768 23.7207 52.8490 0
M  V30 2736 H  99.2205 23.6463 54.4082 0
M  V30 2737 C  100.1287 21.7920 53.8058 0
M  V30 2738 H  101.0862 22.0541 54.2564 0
M  V30 2739 H  99.5949 21.2113 54.5598 0
M  V30 2740 C  100.4129 20.9143 52.5828 0
M  V30 2741 O  100.8190 21.4112 51.5347 0
M  V30 2742 N  100.2283 19.5999 52.7200 0
M  V30 2743 H  100.4146 18.9742 51.9510 0
M  V30 2744 H  99.8576 19.2182 53.5864 0
M  V30 2745 N  96.3647 22.3290 54.5659 0
M  V30 2746 H  96.4671 23.2813 54.8890 0
M  V30 2747 C  95.4090 21.4868 55.2829 0 CFG=2
M  V30 2748 H  95.8666 20.5009 55.3749 0
M  V30 2749 C  94.0824 21.2935 54.5172 0
M  V30 2750 O  93.4266 20.2732 54.7232 0
M  V30 2751 C  95.2061 22.0467 56.7103 0
M  V30 2752 H  96.1836 22.2222 57.1621 0
M  V30 2753 H  94.7285 23.0258 56.6486 0
M  V30 2754 C  94.3930 21.1474 57.6671 0
M  V30 2755 H  94.2618 21.6116 58.6451 0
M  V30 2756 H  93.3893 21.0588 57.2512 0
M  V30 2757 C  94.9803 19.7322 57.8073 0
M  V30 2758 H  94.7344 19.1848 56.8975 0
M  V30 2759 H  96.0675 19.7307 57.8926 0
M  V30 2760 N  94.3138 18.9488 58.8542 0
M  V30 2761 H  93.7055 19.4624 59.4749 0
M  V30 2762 C  94.4772 17.6284 59.0510 0
M  V30 2763 N  95.3090 16.9003 58.2907 0
M  V30 2764 H  95.4203 15.9100 58.4476 0
M  V30 2765 H  95.8627 17.3407 57.5563 0
M  V30 2766 N  93.7943 17.0246 60.0317 0 CHG=1
M  V30 2767 H  93.9050 16.0344 60.1955 0
M  V30 2768 H  93.1625 17.5531 60.6155 0
M  V30 2769 N  93.7113 22.2436 53.6383 0
M  V30 2770 H  94.2818 23.0692 53.5168 0
M  V30 2771 C  92.4773 22.1752 52.8542 0 CFG=2
M  V30 2772 H  91.6859 21.8700 53.5427 0
M  V30 2773 C  92.5386 21.1055 51.7515 0
M  V30 2774 O  91.5643 20.3750 51.6078 0
M  V30 2775 C  92.0807 23.5669 52.3180 0
M  V30 2776 H  92.2064 24.2876 53.1236 0
M  V30 2777 H  92.7544 23.8803 51.5192 0
M  V30 2778 C  90.6106 23.6490 51.8543 0
M  V30 2779 H  90.5144 22.9408 51.0308 0
M  V30 2780 H  89.9102 23.3132 52.6201 0
M  V30 2781 C  90.1926 25.0165 51.2903 0
M  V30 2782 H  90.4290 25.1482 50.2391 0
M  V30 2783 H  89.1032 25.0277 51.3336 0
M  V30 2784 N  90.5390 26.1386 52.1780 0
M  V30 2785 H  89.9862 26.2214 53.0193 0
M  V30 2786 C  91.5919 26.9622 52.0270 0
M  V30 2787 N  91.8892 27.8479 52.9846 0
M  V30 2788 H  92.7122 28.4316 52.8883 0
M  V30 2789 H  91.3300 27.9230 53.8209 0
M  V30 2790 N  92.3666 26.9233 50.9369 0 CHG=1
M  V30 2791 H  93.1842 27.5273 50.8940 0
M  V30 2792 H  92.1468 26.3168 50.1573 0
M  V30 2793 N  93.6778 20.9796 51.0442 0
M  V30 2794 H  94.4453 21.6158 51.2133 0
M  V30 2795 C  93.9156 19.8987 50.0736 0 CFG=2
M  V30 2796 H  93.0024 19.7940 49.4842 0
M  V30 2797 C  94.1345 18.5120 50.7183 0
M  V30 2798 O  93.9071 17.5137 50.0381 0
M  V30 2799 C  95.0380 20.2458 49.0616 0
M  V30 2800 H  95.3809 19.3423 48.5551 0
M  V30 2801 H  94.5973 20.8445 48.2649 0
M  V30 2802 C  96.2430 21.0289 49.6103 0
M  V30 2803 H  96.1502 22.0743 49.3175 0
M  V30 2804 H  96.2522 21.0189 50.6959 0
M  V30 2805 S  97.8669 20.4476 49.0587 0
M  V30 2806 C  98.0183 18.9879 50.1175 0
M  V30 2807 H  99.0240 18.5786 50.0495 0
M  V30 2808 H  97.8405 19.2539 51.1558 0
M  V30 2809 H  97.2984 18.2219 49.8295 0
M  V30 2810 N  94.5073 18.4462 52.0091 0
M  V30 2811 H  94.7007 19.2935 52.5242 0
M  V30 2812 C  94.5320 17.1924 52.7748 0 CFG=2
M  V30 2813 H  95.0374 16.4353 52.1769 0
M  V30 2814 C  93.1238 16.6464 53.0778 0
M  V30 2815 O  92.9423 15.4294 53.0653 0
M  V30 2816 C  95.3337 17.3775 54.0777 0
M  V30 2817 H  94.9694 18.2575 54.6043 0
M  V30 2818 H  95.1480 16.5357 54.7475 0
M  V30 2819 C  96.8530 17.5032 53.8540 0
M  V30 2820 H  97.2518 16.5534 53.4970 0
M  V30 2821 H  97.0590 18.2291 53.0719 0
M  V30 2822 C  97.6276 17.9102 55.1118 0
M  V30 2823 O  97.0678 17.7713 56.2228 0
M  V30 2824 O  98.7798 18.3632 54.9378 0 CHG=-1
M  V30 2825 N  92.1658 17.5514 53.3382 0
M  V30 2826 H  92.4023 18.5338 53.3334 0
M  V30 2827 C  90.7890 17.2234 53.7095 0 CFG=2
M  V30 2828 H  90.7818 16.2657 54.2344 0
M  V30 2829 C  89.8696 17.0823 52.4783 0
M  V30 2830 O  89.1121 16.1156 52.4098 0
M  V30 2831 C  90.2170 18.3025 54.6797 0
M  V30 2832 H  90.4249 19.2836 54.2480 0
M  V30 2833 C  88.6928 18.2384 54.9230 0
M  V30 2834 H  88.3887 18.9500 55.6910 0
M  V30 2835 H  88.1204 18.4855 54.0286 0
M  V30 2836 H  88.3877 17.2455 55.2553 0
M  V30 2837 C  90.9471 18.2546 56.0360 0
M  V30 2838 H  90.6078 19.0532 56.6961 0
M  V30 2839 H  90.7704 17.3063 56.5445 0
M  V30 2840 H  92.0250 18.3678 55.9233 0
M  V30 2841 N  89.9392 18.0490 51.5483 0
M  V30 2842 H  90.5932 18.8117 51.6747 0
M  V30 2843 C  89.0647 18.1512 50.3799 0 CFG=2
M  V30 2844 H  88.0832 17.7585 50.6513 0
M  V30 2845 C  89.5893 17.3254 49.1974 0
M  V30 2846 O  88.8425 16.5058 48.6614 0
M  V30 2847 C  88.8990 19.6479 50.0038 0
M  V30 2848 H  88.5495 20.2003 50.8775 0
M  V30 2849 H  89.8820 20.0558 49.7683 0
M  V30 2850 C  87.9702 19.9611 48.8058 0
M  V30 2851 H  88.3422 19.4166 47.9371 0
M  V30 2852 C  86.5205 19.4907 49.0489 0
M  V30 2853 H  85.7798 20.2332 48.7526 0
M  V30 2854 H  86.3106 18.5875 48.4750 0
M  V30 2855 H  86.3363 19.2585 50.0981 0
M  V30 2856 C  88.0522 21.4563 48.4241 0
M  V30 2857 H  88.3291 21.5709 47.3757 0
M  V30 2858 H  87.1092 21.9834 48.5679 0
M  V30 2859 H  88.8013 21.9907 49.0095 0
M  V30 2860 N  90.8358 17.6056 48.7787 0
M  V30 2861 H  91.3987 18.2730 49.2853 0
M  V30 2862 C  91.3699 17.1335 47.5051 0 CFG=2
M  V30 2863 H  90.5600 17.2079 46.7790 0
M  V30 2864 C  91.8326 15.6729 47.5220 0
M  V30 2865 O  91.4418 14.9320 46.6248 0
M  V30 2866 C  92.4855 18.0658 47.0150 0
M  V30 2867 H  92.8113 17.7802 46.0152 0
M  V30 2868 H  92.1413 19.0994 46.9687 0
M  V30 2869 H  93.3658 18.0364 47.6521 0
M  V30 2870 N  92.6488 15.2851 48.5175 0
M  V30 2871 H  92.9292 15.9592 49.2184 0
M  V30 2872 C  93.2985 13.9704 48.5882 0 CFG=2
M  V30 2873 H  93.8477 13.8923 47.6499 0
M  V30 2874 C  92.3772 12.7265 48.6033 0
M  V30 2875 O  92.7234 11.7661 47.9123 0
M  V30 2876 C  94.3277 13.9347 49.7439 0
M  V30 2877 H  93.9230 14.4771 50.5990 0
M  V30 2878 H  94.4762 12.9112 50.0934 0
M  V30 2879 C  95.7102 14.5127 49.3725 0
M  V30 2880 H  95.5421 15.5025 48.9450 0
M  V30 2881 C  96.5899 14.7150 50.6262 0
M  V30 2882 H  96.8363 15.7693 50.7556 0
M  V30 2883 H  96.0876 14.3865 51.5366 0
M  V30 2884 H  97.5345 14.1739 50.5804 0
M  V30 2885 C  96.4125 13.6582 48.2922 0
M  V30 2886 H  97.3703 13.2618 48.6233 0
M  V30 2887 H  95.8188 12.7937 47.9938 0
M  V30 2888 H  96.5955 14.2483 47.3938 0
M  V30 2889 N  91.2098 12.7560 49.2928 0
M  V30 2890 C  90.2090 11.6762 49.1791 0 CFG=2
M  V30 2891 H  90.6977 10.7398 49.4560 0
M  V30 2892 C  89.5875 11.5320 47.7777 0
M  V30 2893 O  89.4196 10.4055 47.3138 0
M  V30 2894 C  89.1540 12.0251 50.2451 0
M  V30 2895 H  88.3312 12.5958 49.8101 0
M  V30 2896 H  88.7247 11.1403 50.7161 0
M  V30 2897 C  89.8917 12.9034 51.2404 0
M  V30 2898 H  89.2291 13.5263 51.8405 0
M  V30 2899 H  90.4718 12.2774 51.9201 0
M  V30 2900 C  90.8371 13.6965 50.3503 0
M  V30 2901 H  90.3139 14.5420 49.9060 0
M  V30 2902 H  91.6824 14.0768 50.9222 0
M  V30 2903 N  89.2793 12.6688 47.1292 0
M  V30 2904 H  89.4622 13.5591 47.5706 0
M  V30 2905 C  88.6710 12.7246 45.7991 0 CFG=2
M  V30 2906 H  87.8973 11.9566 45.7792 0
M  V30 2907 C  89.6611 12.3907 44.6631 0
M  V30 2908 O  89.2433 11.8000 43.6701 0
M  V30 2909 C  87.9774 14.0960 45.6333 0
M  V30 2910 H  87.2932 14.2397 46.4713 0
M  V30 2911 H  88.7256 14.8829 45.7341 0
M  V30 2912 C  87.1832 14.3044 44.3214 0
M  V30 2913 H  87.8915 14.2590 43.4933 0
M  V30 2914 C  86.1158 13.2153 44.0809 0
M  V30 2915 H  85.1875 13.6278 43.6850 0
M  V30 2916 H  86.4699 12.4802 43.3572 0
M  V30 2917 H  85.8612 12.6793 44.9953 0
M  V30 2918 C  86.5651 15.7151 44.2810 0
M  V30 2919 H  86.6110 16.1296 43.2748 0
M  V30 2920 H  85.5173 15.7107 44.5827 0
M  V30 2921 H  87.0847 16.4086 44.9432 0
M  V30 2922 N  90.9532 12.7136 44.8455 0
M  V30 2923 H  91.2113 13.2347 45.6738 0
M  V30 2924 C  92.0642 12.3225 43.9696 0 CFG=2
M  V30 2925 H  91.8259 12.6782 42.9649 0
M  V30 2926 C  92.2385 10.7911 43.8842 0
M  V30 2927 O  92.4419 10.2729 42.7860 0
M  V30 2928 C  93.3916 12.9995 44.4371 0
M  V30 2929 H  93.3802 13.0135 45.5266 0
M  V30 2930 C  94.7134 12.3079 44.0407 0
M  V30 2931 H  95.5647 12.9236 44.3294 0
M  V30 2932 H  94.8412 11.3480 44.5419 0
M  V30 2933 H  94.7771 12.1396 42.9663 0
M  V30 2934 C  93.4365 14.4695 43.9883 0
M  V30 2935 H  94.2906 14.9914 44.4206 0
M  V30 2936 H  93.5168 14.5428 42.9058 0
M  V30 2937 H  92.5395 15.0101 44.2826 0
M  V30 2938 N  92.1036 10.1029 45.0325 0
M  V30 2939 H  91.9401 10.6051 45.8944 0
M  V30 2940 C  92.1289 8.6433 45.1339 0 CFG=2
M  V30 2941 H  93.0168 8.2895 44.6080 0
M  V30 2942 C  90.9058 7.9633 44.4900 0
M  V30 2943 O  91.0552 6.8678 43.9521 0
M  V30 2944 C  92.2685 8.2440 46.6098 0
M  V30 2945 H  92.3344 7.1611 46.7211 0
M  V30 2946 H  93.1718 8.6721 47.0461 0
M  V30 2947 H  91.4206 8.5877 47.2028 0
M  V30 2948 N  89.7380 8.6304 44.5219 0
M  V30 2949 H  89.6930 9.5212 44.9970 0
M  V30 2950 C  88.5029 8.1894 43.8659 0 CFG=2
M  V30 2951 H  88.3696 7.1310 44.0990 0
M  V30 2952 C  88.5686 8.3015 42.3254 0
M  V30 2953 O  88.0223 7.4306 41.6494 0
M  V30 2954 C  87.2682 8.9610 44.4294 0
M  V30 2955 H  87.5464 10.0092 44.5239 0
M  V30 2956 C  85.9875 8.9337 43.5700 0
M  V30 2957 H  85.1553 9.4121 44.0874 0
M  V30 2958 H  86.1118 9.4621 42.6244 0
M  V30 2959 H  85.6929 7.9094 43.3537 0
M  V30 2960 C  86.9293 8.4676 45.8473 0
M  V30 2961 H  86.1358 9.0661 46.2956 0
M  V30 2962 H  86.5939 7.4301 45.8337 0
M  V30 2963 H  87.7913 8.5227 46.5105 0
M  V30 2964 N  89.2616 9.3291 41.8003 0
M  V30 2965 H  89.6693 10.0197 42.4165 0
M  V30 2966 C  89.4889 9.5273 40.3630 0 CFG=2
M  V30 2967 H  88.5430 9.3390 39.8524 0
M  V30 2968 C  90.5282 8.5381 39.7814 0
M  V30 2969 O  90.3795 8.1257 38.6301 0
M  V30 2970 C  89.9005 10.9961 40.0487 0
M  V30 2971 H  90.7129 11.2687 40.7246 0
M  V30 2972 C  90.3958 11.2402 38.6091 0
M  V30 2973 H  90.5772 12.3001 38.4416 0
M  V30 2974 H  91.3344 10.7294 38.3965 0
M  V30 2975 H  89.6587 10.9114 37.8759 0
M  V30 2976 C  88.7344 11.9644 40.3238 0
M  V30 2977 H  89.0582 13.0025 40.2419 0
M  V30 2978 H  87.9222 11.8136 39.6121 0
M  V30 2979 H  88.3154 11.8348 41.3194 0
M  V30 2980 N  91.5186 8.1258 40.5938 0
M  V30 2981 H  91.6017 8.5290 41.5172 0
M  V30 2982 C  92.4411 7.0275 40.2813 0 CFG=2
M  V30 2983 H  92.8742 7.2102 39.2962 0
M  V30 2984 C  91.7109 5.6731 40.2268 0
M  V30 2985 O  91.9380 4.8999 39.2981 0
M  V30 2986 C  93.5692 6.9805 41.3361 0
M  V30 2987 H  93.1123 7.0267 42.3244 0
M  V30 2988 H  94.0848 6.0204 41.2997 0
M  V30 2989 C  94.6267 8.0947 41.1965 0
M  V30 2990 H  94.0835 9.0131 40.9781 0
M  V30 2991 C  95.3777 8.3440 42.5204 0
M  V30 2992 H  95.2837 9.3862 42.8263 0
M  V30 2993 H  94.9882 7.7389 43.3381 0
M  V30 2994 H  96.4419 8.1244 42.4497 0
M  V30 2995 C  95.5849 7.8253 40.0159 0
M  V30 2996 H  96.5852 7.5444 40.3410 0
M  V30 2997 H  95.2275 7.0212 39.3739 0
M  V30 2998 H  95.6934 8.7085 39.3901 0
M  V30 2999 N  90.8226 5.4308 41.2052 0
M  V30 3000 H  90.6996 6.1178 41.9375 0
M  V30 3001 C  90.0256 4.2097 41.3363 0 CFG=2
M  V30 3002 H  90.7012 3.3636 41.1956 0
M  V30 3003 C  88.9074 4.0994 40.2725 0
M  V30 3004 O  88.4534 2.9901 39.9936 0
M  V30 3005 C  89.4847 4.1624 42.7791 0
M  V30 3006 H  90.2813 4.4487 43.4664 0
M  V30 3007 H  88.6939 4.9017 42.9161 0
M  V30 3008 C  89.0010 2.8070 43.2508 0
M  V30 3009 C  89.9385 1.8464 43.6835 0
M  V30 3010 H  90.9898 2.0899 43.7347 0
M  V30 3011 C  87.6449 2.4411 43.1326 0
M  V30 3012 H  86.9244 3.1470 42.7553 0
M  V30 3013 C  89.5074 0.5830 44.0546 0
M  V30 3014 H  90.2162 -0.1530 44.3957 0
M  V30 3015 C  87.2350 1.1705 43.5076 0
M  V30 3016 H  86.1932 0.8971 43.4305 0
M  V30 3017 C  88.1652 0.2494 43.9709 0
M  V30 3018 H  87.8581 -0.7437 44.2488 0
M  V30 3019 N  88.5167 5.2339 39.6634 0
M  V30 3020 H  88.9094 6.1106 39.9787 0
M  V30 3021 C  87.6454 5.3186 38.4883 0 CFG=2
M  V30 3022 H  86.7641 4.7100 38.6945 0
M  V30 3023 C  88.2642 4.7030 37.2190 0
M  V30 3024 O  87.5395 4.0731 36.4479 0
M  V30 3025 C  87.1485 6.7785 38.3187 0
M  V30 3026 H  86.3403 6.9630 39.0269 0
M  V30 3027 H  87.9364 7.4676 38.6101 0
M  V30 3028 C  86.6683 7.2106 36.9413 0
M  V30 3029 C  85.3567 6.9136 36.5157 0
M  V30 3030 H  84.6595 6.4460 37.1947 0
M  V30 3031 C  87.5770 7.7792 36.0214 0
M  V30 3032 H  88.5978 7.9765 36.3156 0
M  V30 3033 C  84.9594 7.2347 35.2239 0
M  V30 3034 H  83.9513 7.0249 34.9020 0
M  V30 3035 C  87.1602 8.0900 34.7345 0
M  V30 3036 H  87.8547 8.5368 34.0374 0
M  V30 3037 C  85.8558 7.8213 34.3388 0
M  V30 3038 H  85.5396 8.0637 33.3345 0
M  V30 3039 N  89.5868 4.8684 37.0478 0
M  V30 3040 H  90.1150 5.4005 37.7259 0
M  V30 3041 C  90.3584 4.2641 35.9623 0 CFG=2
M  V30 3042 H  89.7694 4.3131 35.0448 0
M  V30 3043 C  90.6630 2.7811 36.2536 0
M  V30 3044 O  90.4183 1.9405 35.3882 0
M  V30 3045 C  91.6970 5.0262 35.7140 0
M  V30 3046 H  92.2380 5.0871 36.6593 0
M  V30 3047 C  92.6537 4.3511 34.7063 0
M  V30 3048 H  93.5195 4.9818 34.5037 0
M  V30 3049 H  93.0441 3.4031 35.0763 0
M  V30 3050 H  92.1549 4.1612 33.7555 0
M  V30 3051 C  91.4337 6.4749 35.2693 0
M  V30 3052 H  92.3686 7.0103 35.1027 0
M  V30 3053 H  90.8626 6.5106 34.3412 0
M  V30 3054 H  90.8782 7.0300 36.0249 0
M  V30 3055 N  91.2010 2.4979 37.4530 0
M  V30 3056 H  91.3697 3.2489 38.1097 0
M  V30 3057 C  91.7770 1.1984 37.7966 0 CFG=2
M  V30 3058 H  92.1787 0.7587 36.8835 0
M  V30 3059 C  90.7550 0.1857 38.3330 0
M  V30 3060 O  90.6061 -0.8844 37.7423 0
M  V30 3061 C  92.9590 1.3934 38.7713 0
M  V30 3062 H  92.6099 1.8955 39.6756 0
M  V30 3063 H  93.3424 0.4250 39.0949 0
M  V30 3064 C  94.1205 2.1864 38.1934 0
M  V30 3065 C  94.7373 1.7781 36.9930 0
M  V30 3066 H  94.3871 0.9043 36.4678 0
M  V30 3067 C  94.6200 3.3221 38.8640 0
M  V30 3068 H  94.1739 3.6443 39.7914 0
M  V30 3069 C  95.7918 2.5098 36.4700 0
M  V30 3070 H  96.2515 2.1987 35.5463 0
M  V30 3071 C  95.6878 4.0326 38.3328 0
M  V30 3072 H  96.0735 4.8965 38.8526 0
M  V30 3073 C  96.2675 3.6283 37.1382 0
M  V30 3074 H  97.0996 4.1760 36.7284 0
M  V30 3075 N  90.0967 0.5208 39.4545 0
M  V30 3076 H  90.2523 1.4309 39.8646 0
M  V30 3077 C  89.2001 -0.3809 40.1861 0
M  V30 3078 H  88.5208 0.2230 40.7881 0
M  V30 3079 H  88.5820 -0.9576 39.4967 0
M  V30 3080 C  89.9610 -1.3422 41.1205 0
M  V30 3081 O  89.3165 -2.1120 41.8327 0
M  V30 3082 N  91.3047 -1.2855 41.1342 0
M  V30 3083 H  91.7600 -0.6247 40.5224 0
M  V30 3084 C  92.1736 -1.9792 42.0776 0
M  V30 3085 H  91.6690 -2.8060 42.5791 0
M  V30 3086 H  93.0236 -2.3918 41.5382 0
M  V30 3087 C  92.6864 -0.9348 43.0721 0
M  V30 3088 O  93.0841 0.1611 42.6729 0
M  V30 3089 N  92.6847 -1.2893 44.3664 0
M  V30 3090 H  92.3463 -2.2088 44.6249 0
M  V30 3091 C  93.0692 -0.4190 45.4810 0 CFG=2
M  V30 3092 H  92.5471 0.5314 45.3512 0
M  V30 3093 C  94.5791 -0.1087 45.5058 0
M  V30 3094 O  94.9436 1.0337 45.7794 0
M  V30 3095 C  92.6290 -1.0316 46.8471 0
M  V30 3096 H  92.9698 -2.0682 46.8756 0
M  V30 3097 C  93.2096 -0.3468 48.1044 0
M  V30 3098 H  92.7763 -0.7643 49.0138 0
M  V30 3099 H  94.2882 -0.4814 48.1881 0
M  V30 3100 H  93.0013 0.7237 48.1026 0
M  V30 3101 C  91.0935 -1.0679 46.9606 0
M  V30 3102 H  90.7779 -1.4753 47.9203 0
M  V30 3103 H  90.6668 -0.0680 46.8766 0
M  V30 3104 H  90.6439 -1.6886 46.1859 0
M  V30 3105 N  95.4179 -1.1121 45.1962 0
M  V30 3106 H  95.0451 -2.0228 44.9698 0
M  V30 3107 C  96.8761 -0.9756 45.1482 0 CFG=2
M  V30 3108 H  97.1892 -0.3252 45.9674 0
M  V30 3109 C  97.3554 -0.3069 43.8423 0
M  V30 3110 O  98.3408 0.4257 43.8842 0
M  V30 3111 C  97.5820 -2.3530 45.3246 0 CFG=2
M  V30 3112 H  97.2057 -3.0080 44.5429 0
M  V30 3113 C  97.1885 -3.0473 46.6479 0
M  V30 3114 H  96.1209 -3.2643 46.6265 0
M  V30 3115 H  97.6740 -4.0221 46.7064 0
M  V30 3116 C  99.1186 -2.3219 45.1661 0
M  V30 3117 H  99.5514 -3.2935 45.3991 0
M  V30 3118 H  99.4204 -2.0842 44.1466 0
M  V30 3119 H  99.5783 -1.5875 45.8275 0
M  V30 3120 C  97.4902 -2.2497 47.9260 0
M  V30 3121 H  97.4839 -2.9046 48.7975 0
M  V30 3122 H  98.4656 -1.7660 47.8872 0
M  V30 3123 H  96.7389 -1.4775 48.0932 0
M  V30 3124 N  96.6276 -0.5140 42.7299 0
M  V30 3125 H  95.8442 -1.1511 42.7644 0
M  V30 3126 C  96.8562 0.1557 41.4468 0 CFG=2
M  V30 3127 H  97.9134 0.0511 41.1945 0
M  V30 3128 C  96.5346 1.6605 41.4891 0
M  V30 3129 O  97.2238 2.4331 40.8260 0
M  V30 3130 C  96.0369 -0.5472 40.3542 0
M  V30 3131 H  96.1395 -0.0454 39.3910 0
M  V30 3132 H  96.3720 -1.5749 40.2188 0
M  V30 3133 H  94.9760 -0.5769 40.6041 0
M  V30 3134 N  95.5265 2.0436 42.2925 0
M  V30 3135 H  94.9910 1.3376 42.7792 0
M  V30 3136 C  95.1553 3.4307 42.5737 0 CFG=2
M  V30 3137 H  95.3285 4.0329 41.6815 0
M  V30 3138 C  95.9824 4.0661 43.7057 0
M  V30 3139 O  96.0498 5.2927 43.7652 0
M  V30 3140 C  93.6555 3.4770 42.9086 0
M  V30 3141 H  93.3223 4.4926 43.1254 0
M  V30 3142 H  93.0576 3.1101 42.0740 0
M  V30 3143 H  93.4225 2.8607 43.7782 0
M  V30 3144 N  96.5984 3.2397 44.5682 0
M  V30 3145 H  96.4778 2.2425 44.4596 0
M  V30 3146 C  97.3842 3.6830 45.7190 0
M  V30 3147 H  97.0093 4.6299 46.1118 0
M  V30 3148 H  97.2691 2.9467 46.5146 0
M  V30 3149 C  98.8794 3.8127 45.3902 0
M  V30 3150 O  99.5869 4.5003 46.1225 0
M  V30 3151 N  99.3675 3.1729 44.3126 0
M  V30 3152 H  98.7488 2.5932 43.7624 0
M  V30 3153 C  100.7657 3.2191 43.8724 0 CFG=2
M  V30 3154 H  101.3662 3.0344 44.7649 0
M  V30 3155 C  101.2273 4.5922 43.3288 0
M  V30 3156 O  102.3180 5.0161 43.7108 0
M  V30 3157 C  101.0397 2.0838 42.8552 0
M  V30 3158 H  100.1031 1.7723 42.3910 0
M  V30 3159 H  101.6457 2.4576 42.0332 0
M  V30 3160 C  101.7572 0.8546 43.4501 0
M  V30 3161 H  101.1613 0.5259 44.3032 0
M  V30 3162 C  101.7783 -0.3193 42.4478 0
M  V30 3163 H  101.4241 -1.2321 42.9255 0
M  V30 3164 H  101.1343 -0.1380 41.5866 0
M  V30 3165 H  102.7741 -0.5258 42.0555 0
M  V30 3166 C  103.1667 1.2070 43.9770 0
M  V30 3167 H  103.9541 0.6139 43.5167 0
M  V30 3168 H  103.4244 2.2505 43.7957 0
M  V30 3169 H  103.2278 1.0404 45.0528 0
M  V30 3170 N  100.4035 5.3006 42.5177 0
M  V30 3171 C  100.6759 6.7021 42.1453 0 CFG=2
M  V30 3172 H  101.6487 6.7301 41.6504 0
M  V30 3173 C  100.6767 7.6895 43.3275 0
M  V30 3174 O  101.4564 8.6404 43.3027 0
M  V30 3175 C  99.5806 7.0352 41.1193 0
M  V30 3176 H  98.7309 7.5196 41.6021 0
M  V30 3177 H  99.9410 7.6975 40.3361 0
M  V30 3178 C  99.1415 5.6915 40.5665 0
M  V30 3179 H  98.1479 5.7005 40.1185 0
M  V30 3180 H  99.8492 5.3557 39.8097 0
M  V30 3181 C  99.2551 4.7836 41.7763 0
M  V30 3182 H  98.3640 4.8690 42.3944 0
M  V30 3183 H  99.3715 3.7478 41.4645 0
M  V30 3184 N  99.8341 7.4280 44.3443 0
M  V30 3185 H  99.2204 6.6281 44.2852 0
M  V30 3186 C  99.7566 8.1999 45.5888 0 CFG=2
M  V30 3187 H  99.7435 9.2605 45.3299 0
M  V30 3188 C  100.9811 7.9553 46.4989 0
M  V30 3189 O  101.4267 8.8962 47.1533 0
M  V30 3190 C  98.4556 7.8760 46.3845 0
M  V30 3191 H  98.4487 6.8094 46.6080 0
M  V30 3192 C  98.3279 8.6098 47.7371 0
M  V30 3193 H  97.3550 8.4251 48.1935 0
M  V30 3194 H  99.0755 8.2804 48.4586 0
M  V30 3195 H  98.4328 9.6882 47.6118 0
M  V30 3196 C  97.1995 8.1532 45.5410 0
M  V30 3197 H  96.2889 7.9070 46.0878 0
M  V30 3198 H  97.1387 9.2013 45.2496 0
M  V30 3199 H  97.1954 7.5533 44.6329 0
M  V30 3200 N  101.5273 6.7239 46.4892 0
M  V30 3201 H  101.0817 5.9943 45.9492 0
M  V30 3202 C  102.7641 6.3439 47.1789 0 CFG=2
M  V30 3203 H  102.6675 6.6596 48.2196 0
M  V30 3204 C  103.9931 7.0501 46.5782 0
M  V30 3205 O  104.7923 7.5993 47.3327 0
M  V30 3206 C  102.9187 4.8079 47.1575 0
M  V30 3207 H  101.9920 4.3558 47.5133 0
M  V30 3208 H  103.0350 4.4594 46.1326 0
M  V30 3209 C  104.0715 4.2628 48.0213 0
M  V30 3210 H  104.9694 4.8720 47.9275 0
M  V30 3211 H  103.7840 4.3114 49.0718 0
M  V30 3212 S  104.5365 2.5517 47.6437 0
M  V30 3213 C  105.5536 2.8254 46.1677 0
M  V30 3214 H  105.9093 1.8732 45.7739 0
M  V30 3215 H  104.9836 3.3300 45.3881 0
M  V30 3216 H  106.4183 3.4407 46.4158 0
M  V30 3217 N  104.0808 7.0706 45.2359 0
M  V30 3218 H  103.3833 6.5752 44.6963 0
M  V30 3219 C  105.0582 7.8357 44.4524 0 CFG=2
M  V30 3220 H  106.0538 7.5133 44.7643 0
M  V30 3221 C  104.9672 9.3575 44.7012 0
M  V30 3222 O  106.0001 10.0254 44.7126 0
M  V30 3223 C  104.8816 7.5321 42.9308 0
M  V30 3224 H  103.8111 7.4912 42.7285 0
M  V30 3225 C  105.4540 8.5661 41.9364 0
M  V30 3226 H  105.3386 8.2133 40.9132 0
M  V30 3227 H  104.9343 9.5231 41.9888 0
M  V30 3228 H  106.5143 8.7449 42.1076 0
M  V30 3229 C  105.4324 6.1384 42.5879 0
M  V30 3230 H  105.2459 5.8978 41.5416 0
M  V30 3231 H  106.5083 6.0839 42.7545 0
M  V30 3232 H  104.9657 5.3591 43.1902 0
M  V30 3233 N  103.7423 9.8583 44.9312 0
M  V30 3234 H  102.9462 9.2373 44.8821 0
M  V30 3235 C  103.4579 11.2571 45.2263 0
M  V30 3236 H  103.9683 11.9048 44.5132 0
M  V30 3237 H  102.3860 11.4052 45.0985 0
M  V30 3238 C  103.8394 11.6422 46.6645 0
M  V30 3239 O  104.2780 12.7690 46.8887 0
M  V30 3240 N  103.7016 10.7129 47.6263 0
M  V30 3241 H  103.3106 9.8126 47.3818 0
M  V30 3242 C  104.0481 10.9186 49.0335 0
M  V30 3243 H  103.6692 11.8803 49.3844 0
M  V30 3244 H  103.5642 10.1454 49.6303 0
M  V30 3245 C  105.5662 10.8348 49.2465 0
M  V30 3246 O  106.1040 11.5850 50.0597 0
M  V30 3247 N  106.2557 9.9618 48.4902 0
M  V30 3248 H  105.7527 9.3493 47.8614 0
M  V30 3249 C  107.7161 9.8613 48.4515 0 CFG=2
M  V30 3250 H  108.0854 9.9014 49.4765 0
M  V30 3251 C  108.3578 11.0409 47.7014 0
M  V30 3252 O  109.4575 11.4465 48.0743 0
M  V30 3253 C  108.1312 8.5187 47.8136 0
M  V30 3254 H  107.6294 8.4256 46.8493 0
M  V30 3255 H  109.2005 8.5238 47.5954 0
M  V30 3256 C  107.8127 7.2689 48.6600 0
M  V30 3257 H  106.7731 7.3287 48.9808 0
M  V30 3258 C  107.9427 5.9944 47.8115 0
M  V30 3259 H  107.9683 5.1025 48.4373 0
M  V30 3260 H  107.0944 5.8892 47.1349 0
M  V30 3261 H  108.8483 6.0090 47.2038 0
M  V30 3262 C  108.6667 7.1839 49.9398 0
M  V30 3263 H  109.4084 6.3901 49.8785 0
M  V30 3264 H  109.2161 8.1010 50.1432 0
M  V30 3265 H  108.0414 6.9834 50.8099 0
M  V30 3266 N  107.6489 11.6012 46.7018 0
M  V30 3267 H  106.7672 11.1890 46.4292 0
M  V30 3268 C  108.0092 12.8491 46.0263 0 CFG=2
M  V30 3269 H  109.0338 12.7293 45.6717 0
M  V30 3270 C  108.0091 14.0290 47.0130 0
M  V30 3271 O  108.9861 14.7722 47.0379 0
M  V30 3272 C  107.1401 13.1183 44.7748 0
M  V30 3273 S  107.4496 14.7468 44.0205 0
M  V30 3274 H  107.3259 12.3533 44.0204 0
M  V30 3275 H  106.0816 13.0631 45.0216 0
M  V30 3276 H  106.9770 15.4699 45.0401 0
M  V30 3277 N  106.9459 14.1438 47.8298 0
M  V30 3278 H  106.1776 13.4918 47.7450 0
M  V30 3279 C  106.8100 15.1693 48.8662 0 CFG=2
M  V30 3280 H  106.9569 16.1204 48.3610 0
M  V30 3281 C  107.8892 15.0652 49.9581 0
M  V30 3282 O  108.5232 16.0733 50.2636 0
M  V30 3283 C  105.3855 15.1821 49.5025 0 CFG=2
M  V30 3284 H  105.1226 14.1460 49.7211 0
M  V30 3285 C  104.3588 15.7103 48.4800 0
M  V30 3286 H  104.4460 16.7942 48.4036 0
M  V30 3287 H  104.6046 15.3305 47.4914 0
M  V30 3288 C  105.2452 15.9771 50.8232 0
M  V30 3289 H  104.2102 16.0027 51.1636 0
M  V30 3290 H  105.8230 15.5377 51.6364 0
M  V30 3291 H  105.5711 17.0101 50.6970 0
M  V30 3292 C  102.9039 15.3260 48.7860 0
M  V30 3293 H  102.4668 14.8005 47.9384 0
M  V30 3294 H  102.8190 14.6688 49.6516 0
M  V30 3295 H  102.2964 16.2105 48.9789 0
M  V30 3296 N  108.0969 13.8484 50.4889 0
M  V30 3297 H  107.5284 13.0699 50.1816 0
M  V30 3298 C  109.0870 13.5518 51.5222 0 CFG=2
M  V30 3299 H  108.8675 14.1927 52.3784 0
M  V30 3300 C  110.5278 13.8462 51.0736 0
M  V30 3301 O  111.2296 14.5847 51.7620 0
M  V30 3302 C  108.9245 12.0910 51.9724 0
M  V30 3303 H  109.6033 11.8508 52.7903 0
M  V30 3304 H  107.9114 11.9011 52.3281 0
M  V30 3305 H  109.1250 11.3927 51.1589 0
M  V30 3306 N  110.9276 13.2974 49.9145 0
M  V30 3307 H  110.2836 12.7230 49.3856 0
M  V30 3308 C  112.2875 13.4135 49.3954 0
M  V30 3309 H  113.0023 13.1295 50.1699 0
M  V30 3310 H  112.4125 12.7021 48.5800 0
M  V30 3311 C  112.6065 14.8297 48.8919 0
M  V30 3312 O  113.7449 15.2648 49.0499 0
M  V30 3313 N  111.6256 15.5547 48.3180 0
M  V30 3314 H  110.7031 15.1555 48.2029 0
M  V30 3315 C  111.8127 16.9163 47.8039 0 CFG=2
M  V30 3316 H  112.7391 16.9256 47.2287 0
M  V30 3317 C  111.9527 17.9726 48.9086 0
M  V30 3318 O  112.6893 18.9336 48.7012 0
M  V30 3319 C  110.6865 17.2956 46.8369 0
M  V30 3320 H  110.8195 18.3080 46.4538 0
M  V30 3321 H  110.6584 16.6276 45.9759 0
M  V30 3322 H  109.7176 17.2529 47.3295 0
M  V30 3323 N  111.3165 17.7572 50.0754 0
M  V30 3324 H  110.7097 16.9548 50.1781 0
M  V30 3325 C  111.5532 18.5565 51.2832 0 CFG=2
M  V30 3326 H  111.4507 19.6094 51.0149 0
M  V30 3327 C  112.9817 18.3744 51.8305 0
M  V30 3328 O  113.5192 19.3290 52.3859 0
M  V30 3329 C  110.5113 18.2121 52.3715 0
M  V30 3330 H  110.4840 17.1282 52.4944 0
M  V30 3331 H  110.8320 18.6104 53.3349 0
M  V30 3332 C  109.0884 18.7472 52.0980 0
M  V30 3333 H  108.8092 18.4308 51.0966 0
M  V30 3334 C  108.0636 18.1066 53.0590 0
M  V30 3335 H  107.2572 17.6321 52.4999 0
M  V30 3336 H  108.5133 17.3347 53.6845 0
M  V30 3337 H  107.6074 18.8293 53.7353 0
M  V30 3338 C  109.0205 20.2897 52.1052 0
M  V30 3339 H  108.1876 20.6752 52.6927 0
M  V30 3340 H  109.9272 20.7351 52.5118 0
M  V30 3341 H  108.8960 20.6733 51.0920 0
M  V30 3342 N  113.5758 17.1822 51.6376 0
M  V30 3343 H  113.0554 16.4457 51.1812 0
M  V30 3344 C  114.9538 16.8729 52.0175 0
M  V30 3345 H  115.1496 17.2065 53.0378 0
M  V30 3346 H  115.0850 15.7914 52.0045 0
M  V30 3347 C  115.9646 17.4951 51.0417 0
M  V30 3348 O  117.0253 17.9367 51.4809 0
M  V30 3349 N  115.6314 17.5604 49.7382 0
M  V30 3350 H  114.7576 17.1532 49.4332 0
M  V30 3351 C  116.4363 18.2121 48.6972 0 CFG=2
M  V30 3352 H  117.4603 17.8449 48.7923 0
M  V30 3353 C  116.4730 19.7424 48.8810 0
M  V30 3354 O  117.5488 20.3302 48.7890 0
M  V30 3355 C  115.9310 17.8655 47.2596 0 CFG=2
M  V30 3356 H  114.8541 18.0354 47.2496 0
M  V30 3357 C  116.1622 16.3706 46.9359 0
M  V30 3358 H  117.2206 16.2069 46.7295 0
M  V30 3359 H  115.9450 15.7530 47.8058 0
M  V30 3360 C  116.5321 18.7333 46.1275 0
M  V30 3361 H  116.2309 18.3738 45.1440 0
M  V30 3362 H  116.2050 19.7715 46.1862 0
M  V30 3363 H  117.6221 18.7203 46.1570 0
M  V30 3364 C  115.3272 15.8464 45.7541 0
M  V30 3365 H  115.0168 14.8156 45.9256 0
M  V30 3366 H  114.4245 16.4354 45.5915 0
M  V30 3367 H  115.9030 15.8657 44.8286 0
M  V30 3368 N  115.3111 20.3454 49.1823 0
M  V30 3369 H  114.4621 19.7964 49.2262 0
M  V30 3370 C  115.1733 21.7732 49.4700 0 CFG=2
M  V30 3371 H  115.7441 22.3181 48.7173 0
M  V30 3372 C  115.7725 22.1806 50.8273 0
M  V30 3373 O  116.2628 23.3010 50.9391 0
M  V30 3374 C  113.6927 22.1860 49.3485 0
M  V30 3375 H  113.0833 21.5538 49.9961 0
M  V30 3376 H  113.5577 23.2025 49.7198 0
M  V30 3377 C  113.1420 22.1037 47.9129 0
M  V30 3378 H  113.2023 21.0829 47.5418 0
M  V30 3379 H  112.0826 22.3618 47.9114 0
M  V30 3380 S  113.9821 23.1406 46.6880 0
M  V30 3381 C  113.5266 24.7788 47.2985 0
M  V30 3382 H  113.7802 25.5524 46.5774 0
M  V30 3383 H  112.4601 24.8362 47.5101 0
M  V30 3384 H  114.0716 24.9786 48.2143 0
M  V30 3385 N  115.7784 21.2668 51.8126 0
M  V30 3386 H  115.3302 20.3727 51.6645 0
M  V30 3387 C  116.4662 21.4394 53.0945 0 CFG=2
M  V30 3388 H  116.2079 22.4296 53.4687 0
M  V30 3389 C  117.9982 21.3962 52.9565 0
M  V30 3390 O  118.6778 22.1242 53.6794 0
M  V30 3391 C  115.9219 20.4007 54.0926 0
M  V30 3392 H  114.8626 20.5930 54.2472 0
M  V30 3393 H  115.9874 19.4107 53.6408 0
M  V30 3394 C  116.6247 20.3257 55.4559 0
M  V30 3395 H  116.1471 19.4914 55.9655 0
M  V30 3396 H  117.6729 20.0493 55.3785 0
M  V30 3397 C  116.4431 21.5583 56.3490 0
M  V30 3398 H  116.5504 22.5115 55.8315 0
M  V30 3399 H  115.4229 21.5286 56.7310 0
M  V30 3400 N  117.2588 21.4385 57.5619 0
M  V30 3401 H  116.7643 21.0973 58.3790 0
M  V30 3402 C  118.5837 21.6417 57.6538 0
M  V30 3403 N  119.3036 22.0684 56.6067 0
M  V30 3404 H  120.2961 22.2273 56.6956 0
M  V30 3405 H  118.8585 22.2276 55.7112 0
M  V30 3406 N  119.2001 21.4017 58.8175 0 CHG=1
M  V30 3407 H  120.1915 21.5649 58.9155 0
M  V30 3408 H  118.6713 21.0829 59.6163 0
M  V30 3409 N  118.5047 20.5855 52.0122 0
M  V30 3410 H  117.8803 19.9948 51.4796 0
M  V30 3411 C  119.9075 20.5687 51.6028 0 CFG=2
M  V30 3412 H  120.5049 20.5035 52.5139 0
M  V30 3413 C  120.3460 21.8720 50.9052 0
M  V30 3414 O  121.4323 22.3645 51.2011 0
M  V30 3415 C  120.2023 19.2808 50.7988 0
M  V30 3416 H  120.1736 18.4323 51.4833 0
M  V30 3417 H  119.4082 19.0944 50.0770 0
M  V30 3418 C  121.5318 19.2271 50.0655 0
M  V30 3419 C  122.7192 18.9356 50.7696 0
M  V30 3420 H  122.6807 18.6797 51.8185 0
M  V30 3421 C  121.6151 19.6251 48.7134 0
M  V30 3422 H  120.7222 19.9039 48.1723 0
M  V30 3423 C  123.9420 18.9752 50.1127 0
M  V30 3424 H  124.8490 18.7399 50.6499 0
M  V30 3425 C  122.8478 19.6606 48.0758 0
M  V30 3426 H  122.9082 19.9559 47.0387 0
M  V30 3427 C  124.0046 19.3285 48.7703 0
M  V30 3428 H  124.9604 19.3628 48.2684 0
M  V30 3429 N  119.4756 22.4297 50.0430 0
M  V30 3430 H  118.6081 21.9527 49.8379 0
M  V30 3431 C  119.6761 23.7207 49.3742 0 CFG=2
M  V30 3432 H  120.6814 23.7215 48.9538 0
M  V30 3433 C  119.5942 24.9246 50.3328 0
M  V30 3434 O  120.2721 25.9204 50.0808 0
M  V30 3435 C  118.6617 23.8816 48.2203 0
M  V30 3436 H  117.6581 23.7220 48.6151 0
M  V30 3437 H  118.6714 24.9111 47.8571 0
M  V30 3438 C  118.9030 22.9432 47.0160 0
M  V30 3439 H  118.9643 21.9232 47.3926 0
M  V30 3440 C  117.7032 22.9788 46.0450 0
M  V30 3441 H  117.9800 23.2672 45.0312 0
M  V30 3442 H  117.2276 21.9999 45.9828 0
M  V30 3443 H  116.9391 23.6844 46.3709 0
M  V30 3444 C  120.2461 23.2302 46.3087 0
M  V30 3445 H  120.9695 22.4442 46.5287 0
M  V30 3446 H  120.1544 23.2805 45.2241 0
M  V30 3447 H  120.6860 24.1738 46.6326 0
M  V30 3448 N  118.8085 24.8037 51.4204 0
M  V30 3449 H  118.2669 23.9588 51.5404 0
M  V30 3450 C  118.6475 25.8204 52.4653 0 CFG=2
M  V30 3451 H  118.3658 26.7474 51.9706 0
M  V30 3452 C  119.9231 26.1000 53.2846 0
M  V30 3453 O  120.0125 27.1671 53.8908 0
M  V30 3454 C  117.4792 25.4349 53.3841 0
M  V30 3455 H  117.2601 26.2371 54.0885 0
M  V30 3456 H  116.5705 25.2588 52.8096 0
M  V30 3457 H  117.6915 24.5358 53.9613 0
M  V30 3458 N  120.8862 25.1600 53.2650 0
M  V30 3459 H  120.7258 24.3113 52.7406 0
M  V30 3460 C  122.2138 25.2850 53.8752 0 CFG=2
M  V30 3461 H  122.0837 25.6201 54.9061 0
M  V30 3462 C  123.0902 26.3229 53.1387 0
M  V30 3463 O  123.8056 27.0782 53.7961 0
M  V30 3464 C  122.9612 23.9122 53.8848 0 CFG=2
M  V30 3465 H  123.0098 23.5668 52.8518 0
M  V30 3466 C  122.1717 22.8499 54.6879 0
M  V30 3467 H  122.2368 23.0786 55.7521 0
M  V30 3468 H  121.1127 22.8957 54.4413 0
M  V30 3469 C  124.4221 23.9750 54.3910 0
M  V30 3470 H  124.8789 22.9860 54.4153 0
M  V30 3471 H  125.0604 24.5827 53.7497 0
M  V30 3472 H  124.4720 24.3855 55.3999 0
M  V30 3473 C  122.6331 21.4047 54.4458 0
M  V30 3474 H  121.8253 20.7022 54.6511 0
M  V30 3475 H  122.9479 21.2489 53.4133 0
M  V30 3476 H  123.4683 21.1421 55.0950 0
M  V30 3477 N  123.0012 26.3446 51.7971 0
M  V30 3478 H  122.3731 25.7022 51.3354 0
M  V30 3479 C  123.7592 27.2394 50.9165 0 CFG=2
M  V30 3480 H  124.7754 27.3277 51.3059 0
M  V30 3481 C  123.1710 28.6613 50.8471 0
M  V30 3482 O  123.9107 29.6000 50.5547 0
M  V30 3483 C  123.8395 26.6187 49.5063 0
M  V30 3484 H  122.8357 26.4984 49.0952 0
M  V30 3485 H  124.3587 27.3006 48.8310 0
M  V30 3486 C  124.5428 25.2735 49.4525 0
M  V30 3487 C  123.8093 24.0862 49.6548 0
M  V30 3488 H  122.7381 24.1282 49.7680 0
M  V30 3489 C  125.9501 25.2033 49.3819 0
M  V30 3490 H  126.5352 26.1056 49.2795 0
M  V30 3491 C  124.4627 22.8643 49.7207 0
M  V30 3492 H  123.8917 21.9607 49.8725 0
M  V30 3493 C  126.5866 23.9698 49.4435 0
M  V30 3494 H  127.6633 23.9167 49.3754 0
M  V30 3495 C  125.8456 22.8053 49.6074 0
M  V30 3496 H  126.3477 21.8505 49.6616 0
M  V30 3497 N  121.8665 28.7930 51.1277 0
M  V30 3498 H  121.3226 27.9676 51.3387 0
M  V30 3499 C  121.1526 30.0628 51.1562 0
M  V30 3500 H  121.5740 30.6822 51.9475 0
M  V30 3501 H  121.2667 30.5913 50.2089 0
M  V30 3502 C  119.6695 29.7302 51.3846 0
M  V30 3503 O  119.1806 28.7733 50.7821 0
M  V30 3504 N  118.9420 30.4903 52.2360 0
M  V30 3505 C  117.5812 30.1326 52.6778 0 CFG=2
M  V30 3506 H  117.5982 29.1303 53.1123 0
M  V30 3507 C  116.5322 30.1703 51.5517 0
M  V30 3508 O  116.4576 31.1436 50.8014 0
M  V30 3509 C  117.2816 31.1490 53.7911 0
M  V30 3510 H  116.2230 31.3904 53.8892 0
M  V30 3511 H  117.6042 30.7365 54.7481 0
M  V30 3512 C  118.1353 32.3588 53.4502 0
M  V30 3513 H  117.6376 32.9493 52.6797 0
M  V30 3514 H  118.3256 33.0110 54.3028 0
M  V30 3515 C  119.3976 31.7252 52.8761 0
M  V30 3516 H  119.8989 32.4020 52.1827 0
M  V30 3517 H  120.0929 31.4709 53.6775 0
M  V30 3518 N  115.7541 29.0824 51.4727 0
M  V30 3519 H  115.9013 28.3377 52.1376 0
M  V30 3520 C  114.6461 28.8695 50.5405 0 CFG=2
M  V30 3521 H  114.9871 29.1049 49.5310 0
M  V30 3522 C  113.4413 29.7674 50.8937 0
M  V30 3523 O  113.1960 30.0001 52.0737 0
M  V30 3524 C  114.2221 27.3726 50.6164 0
M  V30 3525 H  114.0888 27.1176 51.6693 0
M  V30 3526 C  112.8968 27.0057 49.9169 0
M  V30 3527 H  112.7274 25.9291 49.9389 0
M  V30 3528 H  112.0383 27.4510 50.4150 0
M  V30 3529 H  112.8924 27.3255 48.8745 0
M  V30 3530 C  115.3532 26.4670 50.0992 0
M  V30 3531 H  115.0775 25.4188 50.1925 0
M  V30 3532 H  115.5755 26.6668 49.0506 0
M  V30 3533 H  116.2763 26.6015 50.6616 0
M  V30 3534 N  112.7004 30.2555 49.8851 0
M  V30 3535 H  112.9615 30.0649 48.9270 0
M  V30 3536 C  111.5115 31.0871 50.0994 0 CFG=2
M  V30 3537 H  111.8199 31.8747 50.7882 0
M  V30 3538 C  110.3451 30.2960 50.7272 0
M  V30 3539 O  110.1189 29.1400 50.3735 0
M  V30 3540 C  111.0965 31.7696 48.7798 0
M  V30 3541 H  111.9879 32.0627 48.2245 0
M  V30 3542 H  110.5404 31.0846 48.1379 0
M  V30 3543 C  110.2900 33.0281 48.9856 0
M  V30 3544 N  108.9457 33.0090 49.3702 0
M  V30 3545 C  110.6998 34.3401 48.8791 0
M  V30 3546 H  111.6528 34.7658 48.6044 0
M  V30 3547 C  108.6178 34.2818 49.5309 0
M  V30 3548 H  107.6400 34.6013 49.8571 0
M  V30 3549 N  109.6161 35.1172 49.2447 0
M  V30 3550 N  109.6111 30.9627 51.6307 0
M  V30 3551 H  109.8925 31.9036 51.8749 0
M  V30 3552 C  108.4331 30.4573 52.3389 0 CFG=2
M  V30 3553 H  108.7586 29.5907 52.9175 0
M  V30 3554 C  107.2848 29.9925 51.4131 0
M  V30 3555 O  106.6186 29.0096 51.7376 0
M  V30 3556 C  107.9756 31.5534 53.3277 0
M  V30 3557 H  108.8210 31.8465 53.9527 0
M  V30 3558 H  107.6947 32.4541 52.7787 0
M  V30 3559 C  106.8333 31.1762 54.2554 0
M  V30 3560 C  105.4941 31.4042 53.8739 0
M  V30 3561 H  105.2691 31.8514 52.9165 0
M  V30 3562 C  107.1116 30.5948 55.5093 0
M  V30 3563 H  108.1331 30.4281 55.8147 0
M  V30 3564 C  104.4426 31.0352 54.7333 0
M  V30 3565 H  103.4218 31.2074 54.4278 0
M  V30 3566 C  106.0601 30.2280 56.3702 0
M  V30 3567 H  106.2809 29.7818 57.3288 0
M  V30 3568 C  104.7247 30.4478 55.9828 0
M  V30 3569 O  103.7091 30.0994 56.8239 0
M  V30 3570 H  102.8468 30.3949 56.5136 0
M  V30 3571 N  107.0901 30.6874 50.2775 0
M  V30 3572 H  107.6917 31.4754 50.0735 0
M  V30 3573 C  106.0673 30.3840 49.2697 0 CFG=2
M  V30 3574 H  105.1615 30.0751 49.7957 0
M  V30 3575 C  106.4657 29.2199 48.3324 0
M  V30 3576 O  105.5946 28.6867 47.6458 0
M  V30 3577 C  105.7412 31.6846 48.4990 0
M  V30 3578 H  105.5648 32.4844 49.2199 0
M  V30 3579 H  106.6090 31.9994 47.9174 0
M  V30 3580 C  104.5201 31.6369 47.5909 0
M  V30 3581 C  103.2258 31.7392 48.1443 0
M  V30 3582 H  103.1000 31.9186 49.2022 0
M  V30 3583 C  104.6519 31.3441 46.2162 0
M  V30 3584 H  105.6328 31.2185 45.7829 0
M  V30 3585 C  102.1077 31.6091 47.3308 0
M  V30 3586 H  101.1186 31.6932 47.7567 0
M  V30 3587 C  103.5220 31.2223 45.4174 0
M  V30 3588 H  103.6285 31.0106 44.3635 0
M  V30 3589 C  102.2556 31.3588 45.9725 0
M  V30 3590 H  101.3794 31.2573 45.3493 0
M  V30 3591 N  107.7476 28.8087 48.3464 0
M  V30 3592 H  108.4131 29.2753 48.9477 0
M  V30 3593 C  108.2516 27.6399 47.6198 0 CFG=2
M  V30 3594 H  107.7484 27.5945 46.6549 0
M  V30 3595 C  107.9872 26.2976 48.3343 0
M  V30 3596 O  108.2487 25.2539 47.7384 0
M  V30 3597 C  109.7471 27.8288 47.3344 0
M  V30 3598 H  110.1088 27.0580 46.6556 0
M  V30 3599 H  109.9370 28.7930 46.8623 0
M  V30 3600 H  110.3498 27.7708 48.2394 0
M  V30 3601 N  107.4729 26.3316 49.5771 0
M  V30 3602 H  107.2934 27.2268 50.0096 0
M  V30 3603 C  107.0813 25.1520 50.3543 0 CFG=2
M  V30 3604 H  107.9316 24.4669 50.3267 0
M  V30 3605 C  105.8757 24.3719 49.7697 0
M  V30 3606 O  106.0427 23.1739 49.5363 0
M  V30 3607 C  106.8690 25.5356 51.8342 0
M  V30 3608 H  106.1216 26.3231 51.9145 0
M  V30 3609 H  106.4617 24.6779 52.3728 0
M  V30 3610 C  108.1564 26.0030 52.5391 0
M  V30 3611 H  108.9252 25.2326 52.4655 0
M  V30 3612 H  108.5608 26.8921 52.0531 0
M  V30 3613 C  107.9113 26.3173 54.0151 0
M  V30 3614 O  108.3729 25.5932 54.8938 0
M  V30 3615 N  107.1850 27.4018 54.2924 0
M  V30 3616 H  106.9903 27.6520 55.2507 0
M  V30 3617 H  106.8197 27.9768 53.5439 0
M  V30 3618 N  104.7109 25.0203 49.4965 0
M  V30 3619 C  103.5508 24.3317 48.8872 0 CFG=2
M  V30 3620 H  103.3056 23.4501 49.4830 0
M  V30 3621 C  103.7261 23.8505 47.4325 0
M  V30 3622 O  102.9134 23.0374 47.0004 0
M  V30 3623 C  102.3969 25.3433 49.0106 0
M  V30 3624 H  101.6628 25.2858 48.2048 0
M  V30 3625 H  101.8614 25.1695 49.9454 0
M  V30 3626 C  103.0879 26.6929 49.0629 0
M  V30 3627 H  103.3737 26.9988 48.0553 0
M  V30 3628 H  102.4697 27.4809 49.4915 0
M  V30 3629 C  104.3329 26.3837 49.8816 0
M  V30 3630 H  105.0970 27.1369 49.7225 0
M  V30 3631 H  104.0791 26.3835 50.9417 0
M  V30 3632 N  104.7743 24.3047 46.7192 0
M  V30 3633 H  105.4005 24.9760 47.1396 0
M  V30 3634 C  105.1396 23.8555 45.3651 0 CFG=2
M  V30 3635 H  104.3031 24.0703 44.7007 0
M  V30 3636 C  105.4314 22.3412 45.2942 0
M  V30 3637 O  105.0836 21.6986 44.3033 0
M  V30 3638 C  106.3969 24.6116 44.8481 0
M  V30 3639 H  107.1882 24.4679 45.5809 0
M  V30 3640 C  106.9661 24.1135 43.5011 0
M  V30 3641 H  107.7397 24.7838 43.1269 0
M  V30 3642 H  107.4266 23.1297 43.5894 0
M  V30 3643 H  106.1889 24.0494 42.7407 0
M  V30 3644 C  106.1475 26.1241 44.7717 0
M  V30 3645 H  107.0646 26.6373 44.4877 0
M  V30 3646 H  105.3788 26.3676 44.0390 0
M  V30 3647 H  105.8319 26.5362 45.7298 0
M  V30 3648 N  106.0236 21.8072 46.3736 0
M  V30 3649 H  106.2627 22.4098 47.1487 0
M  V30 3650 C  106.3117 20.3901 46.5645 0 CFG=2
M  V30 3651 H  106.8475 20.0423 45.6807 0
M  V30 3652 C  105.0301 19.5323 46.6960 0
M  V30 3653 O  105.0005 18.4225 46.1646 0
M  V30 3654 C  107.2242 20.1961 47.8108 0
M  V30 3655 H  106.7529 20.6952 48.6588 0
M  V30 3656 C  107.4228 18.7314 48.2277 0
M  V30 3657 H  108.2498 18.6196 48.9267 0
M  V30 3658 H  106.5333 18.3373 48.7191 0
M  V30 3659 H  107.6367 18.1098 47.3585 0
M  V30 3660 C  108.5964 20.8729 47.6186 0
M  V30 3661 H  109.2260 20.7489 48.5003 0
M  V30 3662 H  109.1338 20.4498 46.7705 0
M  V30 3663 H  108.4972 21.9452 47.4472 0
M  V30 3664 N  103.9913 20.0770 47.3550 0
M  V30 3665 H  104.0893 20.9977 47.7582 0
M  V30 3666 C  102.6753 19.4491 47.5064 0 CFG=2
M  V30 3667 H  102.8144 18.3837 47.6981 0
M  V30 3668 C  101.8041 19.5525 46.2411 0
M  V30 3669 O  101.0511 18.6196 45.9682 0
M  V30 3670 C  101.9484 20.0629 48.7167 0
M  V30 3671 H  101.9936 21.1524 48.7078 0
M  V30 3672 H  100.8920 19.7910 48.7106 0
M  V30 3673 O  102.4984 19.5717 49.9209 0
M  V30 3674 H  102.1040 20.0641 50.6481 0
M  V30 3675 N  101.9362 20.6579 45.4831 0
M  V30 3676 H  102.5553 21.3938 45.7968 0
M  V30 3677 C  101.2723 20.8901 44.1945 0 CFG=2
M  V30 3678 H  100.1966 20.7910 44.3452 0
M  V30 3679 C  101.6890 19.8442 43.1442 0
M  V30 3680 O  100.8247 19.2193 42.5312 0
M  V30 3681 C  101.5967 22.3210 43.6904 0
M  V30 3682 H  102.6719 22.4717 43.7740 0
M  V30 3683 H  101.3869 22.4107 42.6240 0
M  V30 3684 C  100.8691 23.4706 44.4252 0
M  V30 3685 H  100.9002 23.2718 45.4953 0
M  V30 3686 C  101.5632 24.8280 44.1858 0
M  V30 3687 H  100.8703 25.5864 43.8196 0
M  V30 3688 H  101.9965 25.2099 45.1106 0
M  V30 3689 H  102.3673 24.7577 43.4525 0
M  V30 3690 C  99.3873 23.5571 44.0371 0
M  V30 3691 H  98.8918 24.3681 44.5711 0
M  V30 3692 H  99.2767 23.7550 42.9714 0
M  V30 3693 H  98.8505 22.6386 44.2717 0
M  V30 3694 N  103.0075 19.6626 42.9817 0
M  V30 3695 H  103.6534 20.2177 43.5277 0
M  V30 3696 C  103.6130 18.7267 42.0340 0 CFG=2
M  V30 3697 H  103.0748 18.8015 41.0862 0
M  V30 3698 C  103.5183 17.2635 42.5069 0
M  V30 3699 O  103.3233 16.3810 41.6735 0
M  V30 3700 C  105.0986 19.1134 41.7816 0 CFG=2
M  V30 3701 H  105.5615 19.2428 42.7621 0
M  V30 3702 C  105.1646 20.4789 41.0592 0
M  V30 3703 H  104.9449 20.3480 40.0016 0
M  V30 3704 H  104.3998 21.1611 41.4305 0
M  V30 3705 C  105.9524 18.0658 41.0268 0
M  V30 3706 H  106.9557 18.4391 40.8298 0
M  V30 3707 H  106.0743 17.1408 41.5912 0
M  V30 3708 H  105.5159 17.8114 40.0650 0
M  V30 3709 C  106.5095 21.1838 41.2112 0
M  V30 3710 H  106.4104 22.2494 41.0103 0
M  V30 3711 H  106.9083 21.0791 42.2202 0
M  V30 3712 H  107.2416 20.7830 40.5130 0
M  V30 3713 N  103.6186 17.0379 43.8271 0
M  V30 3714 H  103.7791 17.8170 44.4514 0
M  V30 3715 C  103.5823 15.7116 44.4382 0
M  V30 3716 H  104.2843 15.0454 43.9357 0
M  V30 3717 H  103.9221 15.8068 45.4659 0
M  V30 3718 C  102.1783 15.0869 44.4470 0
M  V30 3719 O  102.0780 13.8686 44.5485 0
M  V30 3720 N  101.1061 15.8882 44.3328 0
M  V30 3721 H  101.2367 16.8893 44.2850 0
M  V30 3722 C  99.7136 15.4171 44.3417 0 CFG=2
M  V30 3723 H  99.6817 14.3318 44.4269 0
M  V30 3724 C  98.9839 15.7313 43.0232 0
M  V30 3725 O  97.8108 15.3826 42.8917 0
M  V30 3726 C  98.9790 16.0110 45.5640 0
M  V30 3727 H  98.9228 17.0944 45.4488 0
M  V30 3728 H  97.9455 15.6609 45.5808 0
M  V30 3729 C  99.6440 15.6698 46.9186 0
M  V30 3730 H  100.6730 16.0266 46.8874 0
M  V30 3731 C  98.9868 16.4438 48.0723 0
M  V30 3732 H  98.5125 15.7898 48.8018 0
M  V30 3733 H  99.7398 17.0279 48.6002 0
M  V30 3734 H  98.2228 17.1371 47.7195 0
M  V30 3735 C  99.7023 14.1525 47.1900 0
M  V30 3736 H  99.6017 13.9160 48.2490 0
M  V30 3737 H  98.9182 13.6173 46.6563 0
M  V30 3738 H  100.6551 13.7336 46.8679 0
M  V30 3739 N  99.6923 16.3565 42.0708 0
M  V30 3740 H  100.6490 16.6098 42.2715 0
M  V30 3741 C  99.2148 16.6507 40.7300 0
M  V30 3742 H  98.1493 16.4483 40.6096 0
M  V30 3743 H  99.3700 17.7087 40.5145 0
M  V30 3744 C  100.0265 15.7806 39.7719 0
M  V30 3745 O  99.6097 14.6730 39.4363 0
M  V30 3746 N  101.1778 16.3151 39.3321 0
M  V30 3747 H  101.4476 17.2212 39.6859 0
M  V30 3748 C  102.0793 15.7618 38.3152 0 CFG=2
M  V30 3749 H  101.5120 15.7091 37.3841 0
M  V30 3750 C  102.5953 14.3396 38.6258 0
M  V30 3751 O  102.5907 13.5010 37.7267 0
M  V30 3752 C  103.3111 16.6955 38.0906 0 CFG=2
M  V30 3753 H  103.8263 16.7813 39.0458 0
M  V30 3754 C  102.8711 18.1236 37.6931 0
M  V30 3755 H  102.3477 18.0815 36.7400 0
M  V30 3756 H  102.1474 18.5181 38.4062 0
M  V30 3757 C  104.3377 16.1482 37.0706 0
M  V30 3758 H  105.1609 16.8396 36.8954 0
M  V30 3759 H  104.8020 15.2229 37.4100 0
M  V30 3760 H  103.8661 15.9545 36.1076 0
M  V30 3761 C  104.0218 19.1355 37.5902 0
M  V30 3762 H  103.7331 20.0898 38.0260 0
M  V30 3763 H  104.9200 18.8035 38.1079 0
M  V30 3764 H  104.2897 19.3136 36.5494 0
M  V30 3765 N  103.0211 14.0951 39.8776 0
M  V30 3766 H  103.0040 14.8433 40.5596 0
M  V30 3767 C  103.5887 12.8221 40.3313 0 CFG=2
M  V30 3768 H  104.3855 12.5585 39.6352 0
M  V30 3769 C  102.5851 11.6612 40.3346 0
M  V30 3770 O  102.9728 10.5330 40.0280 0
M  V30 3771 C  104.1838 13.0084 41.7337 0
M  V30 3772 H  104.7605 12.1350 42.0411 0
M  V30 3773 H  104.8442 13.8743 41.7757 0
M  V30 3774 H  103.3994 13.1618 42.4712 0
M  V30 3775 N  101.3149 11.9699 40.6435 0
M  V30 3776 H  101.0768 12.9225 40.8798 0
M  V30 3777 C  100.2023 11.0300 40.5487 0 CFG=2
M  V30 3778 H  100.5399 10.0778 40.9636 0
M  V30 3779 C  99.8055 10.7579 39.0829 0
M  V30 3780 O  99.4822 9.6156 38.7719 0
M  V30 3781 C  98.9770 11.4993 41.3918 0 CFG=2
M  V30 3782 H  98.7994 12.5532 41.1699 0
M  V30 3783 C  99.3179 11.3924 42.8971 0
M  V30 3784 H  99.4828 10.3463 43.1458 0
M  V30 3785 H  100.2571 11.9035 43.1125 0
M  V30 3786 C  97.6659 10.7396 41.0910 0
M  V30 3787 H  96.8454 11.0789 41.7217 0
M  V30 3788 H  97.3362 10.8855 40.0635 0
M  V30 3789 H  97.7891 9.6702 41.2523 0
M  V30 3790 C  98.2422 11.9353 43.8429 0
M  V30 3791 H  98.6693 12.1834 44.8134 0
M  V30 3792 H  97.7735 12.8311 43.4398 0
M  V30 3793 H  97.4609 11.1955 44.0130 0
M  V30 3794 N  99.8820 11.7735 38.2029 0
M  V30 3795 H  100.1450 12.6952 38.5250 0
M  V30 3796 C  99.6282 11.6300 36.7620 0 CFG=2
M  V30 3797 H  98.6756 11.1035 36.6676 0
M  V30 3798 C  100.6904 10.7820 36.0397 0
M  V30 3799 O  100.3201 9.9950 35.1699 0
M  V30 3800 C  99.4675 13.0063 36.0791 0
M  V30 3801 H  100.3573 13.6157 36.2384 0
M  V30 3802 H  99.3788 12.8682 35.0005 0
M  V30 3803 C  98.2487 13.8104 36.5398 0
M  V30 3804 O  97.4550 13.4541 37.4094 0
M  V30 3805 O  98.1216 14.9675 35.8328 0
M  V30 3806 N  101.9696 10.9103 36.4388 0
M  V30 3807 H  102.2028 11.6041 37.1380 0
M  V30 3808 C  103.0791 10.0744 35.9628 0 CFG=2
M  V30 3809 H  103.1244 10.1525 34.8752 0
M  V30 3810 C  102.8813 8.5884 36.2996 0
M  V30 3811 O  103.1424 7.7429 35.4441 0
M  V30 3812 C  104.4164 10.5578 36.5658 0
M  V30 3813 H  104.3439 10.5971 37.6535 0
M  V30 3814 H  105.1774 9.8086 36.3462 0
M  V30 3815 C  105.0164 11.8669 36.0777 0
M  V30 3816 C  104.4238 12.6434 35.0577 0
M  V30 3817 H  103.4862 12.3581 34.6064 0
M  V30 3818 C  106.2345 12.2914 36.6469 0
M  V30 3819 H  106.6907 11.7071 37.4306 0
M  V30 3820 C  105.0621 13.8090 34.5980 0
M  V30 3821 H  104.5882 14.3911 33.8234 0
M  V30 3822 C  106.8744 13.4567 36.1859 0
M  V30 3823 H  107.8106 13.7679 36.6248 0
M  V30 3824 C  106.2949 14.2110 35.1501 0
M  V30 3825 O  106.9233 15.3327 34.6942 0
M  V30 3826 H  106.5124 15.6846 33.8966 0
M  V30 3827 N  102.3919 8.3101 37.5205 0
M  V30 3828 H  102.2044 9.0669 38.1639 0
M  V30 3829 C  102.0961 6.9588 37.9807 0
M  V30 3830 H  102.9323 6.3052 37.7370 0
M  V30 3831 H  101.9940 6.9641 39.0657 0
M  V30 3832 C  100.8073 6.4106 37.3502 0
M  V30 3833 O  100.7196 5.2024 37.1432 0
M  V30 3834 N  99.8277 7.2779 37.0276 0
M  V30 3835 H  99.9485 8.2583 37.2440 0
M  V30 3836 C  98.5562 6.9150 36.3948 0 CFG=2
M  V30 3837 H  98.1260 6.1241 37.0094 0
M  V30 3838 C  98.7828 6.3588 34.9785 0
M  V30 3839 O  98.3405 5.2451 34.7053 0
M  V30 3840 C  97.5765 8.1176 36.4369 0
M  V30 3841 H  97.6477 8.5478 37.4346 0
M  V30 3842 H  97.9025 8.9019 35.7532 0
M  V30 3843 C  96.0747 7.8047 36.2067 0
M  V30 3844 H  95.8044 6.9980 36.8897 0
M  V30 3845 C  95.1996 9.0190 36.5876 0
M  V30 3846 H  94.3910 8.7213 37.2559 0
M  V30 3847 H  95.7735 9.7940 37.0952 0
M  V30 3848 H  94.7438 9.4971 35.7202 0
M  V30 3849 C  95.7423 7.3301 34.7816 0
M  V30 3850 H  94.7669 7.6800 34.4423 0
M  V30 3851 H  96.4794 7.6868 34.0626 0
M  V30 3852 H  95.7191 6.2413 34.7298 0
M  V30 3853 N  99.5044 7.1149 34.1300 0
M  V30 3854 H  99.8406 8.0195 34.4337 0
M  V30 3855 C  99.8744 6.7070 32.7705 0 CFG=2
M  V30 3856 H  98.9472 6.4285 32.2649 0
M  V30 3857 C  100.7721 5.4552 32.6910 0
M  V30 3858 O  100.6017 4.6751 31.7554 0
M  V30 3859 C  100.4883 7.8932 31.9887 0
M  V30 3860 H  101.1235 8.4884 32.6473 0
M  V30 3861 H  101.1538 7.5214 31.2072 0
M  V30 3862 C  99.4861 8.8096 31.3002 0
M  V30 3863 C  98.9224 8.4332 30.0613 0
M  V30 3864 H  99.2379 7.5204 29.5773 0
M  V30 3865 C  99.0099 9.9768 31.9351 0
M  V30 3866 H  99.3946 10.2714 32.8974 0
M  V30 3867 C  97.9700 9.2417 29.4522 0
M  V30 3868 H  97.5537 8.9584 28.4967 0
M  V30 3869 C  98.0597 10.7736 31.3092 0
M  V30 3870 H  97.7184 11.6793 31.7874 0
M  V30 3871 C  97.5463 10.4114 30.0705 0
M  V30 3872 H  96.8061 11.0357 29.5925 0
M  V30 3873 N  101.6883 5.2739 33.6600 0
M  V30 3874 H  101.7791 5.9591 34.3975 0
M  V30 3875 C  102.6108 4.1337 33.7160 0 CFG=2
M  V30 3876 H  102.9341 3.9396 32.6910 0
M  V30 3877 C  101.9492 2.8214 34.1861 0
M  V30 3878 O  102.2090 1.7856 33.5737 0
M  V30 3879 C  103.8973 4.4743 34.5351 0 CFG=2
M  V30 3880 H  103.5893 5.0838 35.3858 0
M  V30 3881 C  104.8253 5.3434 33.6495 0
M  V30 3882 H  105.2056 4.7388 32.8253 0
M  V30 3883 H  104.2525 6.1483 33.1873 0
M  V30 3884 C  104.6771 3.2720 35.1233 0
M  V30 3885 H  105.5514 3.5983 35.6834 0
M  V30 3886 H  104.0789 2.6880 35.8227 0
M  V30 3887 H  105.0268 2.6024 34.3413 0
M  V30 3888 C  106.0170 5.9725 34.3764 0
M  V30 3889 H  106.4525 6.7762 33.7848 0
M  V30 3890 H  105.7246 6.3890 35.3397 0
M  V30 3891 H  106.8027 5.2364 34.5399 0
M  V30 3892 N  101.0888 2.8759 35.2197 0
M  V30 3893 H  100.9172 3.7523 35.6957 0
M  V30 3894 C  100.3340 1.7087 35.6978 0 CFG=2
M  V30 3895 H  101.0299 0.8702 35.7663 0
M  V30 3896 C  99.2216 1.2980 34.7094 0
M  V30 3897 O  99.0146 0.0998 34.5209 0
M  V30 3898 C  99.7330 1.9296 37.1187 0
M  V30 3899 H  99.1741 2.8662 37.1053 0
M  V30 3900 C  98.7701 0.8238 37.6088 0
M  V30 3901 H  98.4491 1.0128 38.6336 0
M  V30 3902 H  97.8641 0.7577 37.0095 0
M  V30 3903 H  99.2513 -0.1548 37.5911 0
M  V30 3904 C  100.8521 2.0805 38.1615 0
M  V30 3905 H  100.4447 2.3313 39.1416 0
M  V30 3906 H  101.4202 1.1553 38.2639 0
M  V30 3907 H  101.5574 2.8652 37.8935 0
M  V30 3908 N  98.5745 2.2837 34.0574 0
M  V30 3909 H  98.7932 3.2484 34.2699 0
M  V30 3910 C  97.5861 2.0668 32.9960 0 CFG=2
M  V30 3911 H  96.8414 1.3691 33.3845 0
M  V30 3912 C  98.2024 1.4226 31.7408 0
M  V30 3913 O  97.5738 0.5345 31.1686 0
M  V30 3914 C  96.8634 3.3919 32.6728 0
M  V30 3915 H  96.4111 3.8054 33.5745 0
M  V30 3916 H  97.5663 4.1364 32.2964 0
M  V30 3917 O  95.8334 3.2166 31.7196 0
M  V30 3918 H  96.2259 2.9540 30.8826 0
M  V30 3919 N  99.4300 1.8364 31.3733 0
M  V30 3920 H  99.8809 2.5823 31.8853 0
M  V30 3921 C  100.2169 1.2234 30.3024 0 CFG=2
M  V30 3922 H  99.5735 1.1982 29.4204 0
M  V30 3923 C  100.6047 -0.2279 30.6312 0
M  V30 3924 O  100.3988 -1.0876 29.7809 0
M  V30 3925 C  101.4330 2.1164 29.9627 0
M  V30 3926 H  101.0782 3.0705 29.5720 0
M  V30 3927 H  101.9615 2.3529 30.8866 0
M  V30 3928 C  102.4645 1.5099 28.9872 0
M  V30 3929 H  103.2819 2.2290 28.9326 0
M  V30 3930 H  102.9220 0.6006 29.3727 0
M  V30 3931 C  101.9645 1.2804 27.5521 0
M  V30 3932 H  102.6408 0.5953 27.0435 0
M  V30 3933 H  100.9853 0.8018 27.5568 0
M  V30 3934 N  101.7792 2.5449 26.8240 0
M  V30 3935 H  101.5089 3.3394 27.3841 0
M  V30 3936 C  101.8614 2.6971 25.4898 0
M  V30 3937 N  101.6562 3.9056 24.9518 0
M  V30 3938 H  101.7128 4.0275 23.9409 0
M  V30 3939 H  101.4508 4.7038 25.5329 0
M  V30 3940 N  102.1517 1.6681 24.6815 0 CHG=1
M  V30 3941 H  102.2602 1.8200 23.6803 0
M  V30 3942 H  102.3085 0.7462 25.0648 0
M  V30 3943 N  101.1064 -0.4819 31.8539 0
M  V30 3944 H  101.2545 0.2836 32.4982 0
M  V30 3945 C  101.4769 -1.8156 32.3426 0 CFG=2
M  V30 3946 H  102.2137 -2.2072 31.6394 0
M  V30 3947 C  100.3278 -2.8445 32.3324 0
M  V30 3948 O  100.5724 -4.0076 32.0177 0
M  V30 3949 C  102.1898 -1.6939 33.7104 0
M  V30 3950 H  103.1404 -1.1802 33.5630 0
M  V30 3951 H  101.6098 -1.0556 34.3775 0
M  V30 3952 C  102.4897 -3.0013 34.4279 0
M  V30 3953 C  103.5749 -3.8033 34.0150 0
M  V30 3954 H  104.2467 -3.4531 33.2450 0
M  V30 3955 C  101.5887 -3.5093 35.3884 0
M  V30 3956 H  100.7227 -2.9331 35.6807 0
M  V30 3957 C  103.7732 -5.0514 34.5914 0
M  V30 3958 H  104.6034 -5.6660 34.2774 0
M  V30 3959 C  101.8107 -4.7553 35.9585 0
M  V30 3960 H  101.1251 -5.1345 36.7012 0
M  V30 3961 C  102.9005 -5.5209 35.5641 0
M  V30 3962 H  103.0628 -6.4931 36.0044 0
M  V30 3963 N  99.0974 -2.3898 32.6236 0
M  V30 3964 H  98.9805 -1.4202 32.8850 0
M  V30 3965 C  97.8705 -3.1852 32.5292 0 CFG=2
M  V30 3966 H  98.0291 -4.0988 33.1063 0
M  V30 3967 C  97.5284 -3.6021 31.0865 0
M  V30 3968 O  97.0645 -4.7263 30.9021 0
M  V30 3969 C  96.7098 -2.4016 33.1707 0
M  V30 3970 H  96.7119 -1.3787 32.7931 0
M  V30 3971 H  95.7551 -2.8336 32.8663 0
M  V30 3972 C  96.7538 -2.4000 34.7095 0
M  V30 3973 H  96.5569 -3.3828 35.1364 0
M  V30 3974 H  97.7809 -2.1701 34.9920 0
M  V30 3975 C  95.8999 -1.3008 35.3560 0
M  V30 3976 H  95.8494 -1.5181 36.4206 0
M  V30 3977 H  96.3746 -0.3226 35.2872 0
M  V30 3978 N  94.5153 -1.2888 34.8503 0
M  V30 3979 H  94.4310 -1.0696 33.8683 0
M  V30 3980 C  93.3771 -1.4820 35.5413 0
M  V30 3981 N  93.3710 -1.8411 36.8319 0
M  V30 3982 H  92.4957 -1.9545 37.3236 0
M  V30 3983 H  94.2362 -2.1018 37.2993 0
M  V30 3984 N  92.2048 -1.3101 34.9178 0 CHG=1
M  V30 3985 H  91.3381 -1.4359 35.4219 0
M  V30 3986 H  92.1723 -1.0458 33.9436 0
M  V30 3987 N  97.7905 -2.7269 30.0975 0
M  V30 3988 H  98.1742 -1.8181 30.3182 0
M  V30 3989 C  97.6309 -3.0315 28.6711 0 CFG=2
M  V30 3990 H  96.6551 -3.5028 28.5387 0
M  V30 3991 C  98.6831 -4.0282 28.1531 0
M  V30 3992 O  98.3308 -4.8893 27.3498 0
M  V30 3993 C  97.6376 -1.7389 27.8301 0
M  V30 3994 H  98.5684 -1.1947 27.9901 0
M  V30 3995 H  97.6294 -1.9989 26.7695 0
M  V30 3996 C  96.4453 -0.8111 28.1213 0
M  V30 3997 H  95.5097 -1.3396 27.9347 0
M  V30 3998 H  96.4258 -0.5172 29.1683 0
M  V30 3999 C  96.4892 0.4489 27.2604 0
M  V30 4000 O  95.6940 0.5078 26.2981 0
M  V30 4001 O  97.3242 1.3324 27.5562 0 CHG=-1
M  V30 4002 N  99.9308 -3.9257 28.6461 0
M  V30 4003 H  100.1488 -3.1765 29.2892 0
M  V30 4004 C  101.0229 -4.8522 28.3357 0 CFG=2
M  V30 4005 H  101.1027 -4.9192 27.2492 0
M  V30 4006 C  100.7556 -6.2769 28.8600 0
M  V30 4007 O  100.9318 -7.2400 28.1145 0
M  V30 4008 C  102.3526 -4.3157 28.9100 0
M  V30 4009 H  102.2673 -4.2220 29.9918 0
M  V30 4010 H  103.1196 -5.0689 28.7420 0
M  V30 4011 C  102.8544 -2.9625 28.3581 0
M  V30 4012 H  102.1253 -2.1802 28.5317 0
M  V30 4013 H  103.7533 -2.6653 28.8950 0
M  V30 4014 C  103.1935 -2.9568 26.8722 0
M  V30 4015 O  103.2425 -1.8468 26.2997 0
M  V30 4016 O  103.4416 -4.0539 26.3309 0 CHG=-1
M  V30 4017 N  100.2952 -6.3793 30.1186 0
M  V30 4018 H  100.1886 -5.5406 30.6745 0
M  V30 4019 C  99.8854 -7.6316 30.7609 0 CFG=2
M  V30 4020 H  100.7174 -8.3294 30.6533 0
M  V30 4021 C  98.6635 -8.2860 30.0770 0
M  V30 4022 O  98.6360 -9.5113 29.9597 0
M  V30 4023 C  99.6101 -7.4118 32.2836 0 CFG=2
M  V30 4024 H  99.0149 -6.4997 32.3603 0
M  V30 4025 C  100.9160 -7.1211 33.0623 0
M  V30 4026 H  101.5016 -6.3589 32.5498 0
M  V30 4027 H  100.6513 -6.6793 34.0233 0
M  V30 4028 C  98.7892 -8.5046 33.0080 0
M  V30 4029 H  98.7197 -8.2943 34.0757 0
M  V30 4030 H  97.7658 -8.5620 32.6370 0
M  V30 4031 H  99.2417 -9.4898 32.8941 0
M  V30 4032 C  101.8183 -8.3402 33.3180 0
M  V30 4033 H  102.8689 -8.0662 33.2307 0
M  V30 4034 H  101.6639 -8.7350 34.3224 0
M  V30 4035 H  101.6349 -9.1499 32.6129 0
M  V30 4036 N  97.7099 -7.4625 29.6019 0
M  V30 4037 H  97.8006 -6.4656 29.7449 0
M  V30 4038 C  96.5220 -7.8973 28.8617 0 CFG=2
M  V30 4039 H  96.0603 -8.7070 29.4301 0
M  V30 4040 C  96.8243 -8.4426 27.4525 0
M  V30 4041 O  96.1013 -9.3294 26.9994 0
M  V30 4042 C  95.5120 -6.7428 28.7935 0
M  V30 4043 H  94.6096 -7.0374 28.2565 0
M  V30 4044 H  95.2061 -6.4318 29.7926 0
M  V30 4045 H  95.9297 -5.8729 28.2869 0
M  V30 4046 N  97.8960 -7.9447 26.8071 0
M  V30 4047 H  98.4258 -7.1946 27.2299 0
M  V30 4048 C  98.4178 -8.4595 25.5343 0 CFG=2
M  V30 4049 H  97.5694 -8.6609 24.8771 0
M  V30 4050 C  99.1651 -9.8023 25.6658 0
M  V30 4051 O  99.3717 -10.4605 24.6470 0
M  V30 4052 C  99.2905 -7.3844 24.8525 0
M  V30 4053 H  99.9896 -6.9632 25.5768 0
M  V30 4054 H  99.9058 -7.8368 24.0723 0
M  V30 4055 C  98.4457 -6.2513 24.2340 0
M  V30 4056 H  97.7901 -6.6655 23.4674 0
M  V30 4057 H  97.7925 -5.8112 24.9867 0
M  V30 4058 C  99.2647 -5.1279 23.5907 0
M  V30 4059 O  100.4937 -5.3004 23.4285 0
M  V30 4060 O  98.6313 -4.1036 23.2555 0 CHG=-1
M  V30 4061 N  99.5110 -10.2065 26.8999 0
M  V30 4062 H  99.2950 -9.6109 27.6874 0
M  V30 4063 C  100.0683 -11.5217 27.2049 0
M  V30 4064 H  99.5465 -11.9125 28.0788 0
M  V30 4065 H  99.8947 -12.2351 26.3973 0
M  V30 4066 C  101.5685 -11.4736 27.5215 0
M  V30 4067 O  102.1621 -12.5411 27.6712 0
M  V30 4068 N  102.1893 -10.2837 27.6383 0
M  V30 4069 H  101.6670 -9.4277 27.5097 0
M  V30 4070 C  103.5860 -10.1406 28.0644 0 CFG=2
M  V30 4071 H  104.1889 -10.8279 27.4671 0
M  V30 4072 C  103.7703 -10.4995 29.5480 0
M  V30 4073 O  102.9424 -10.1193 30.3772 0
M  V30 4074 C  104.0846 -8.7028 27.8069 0
M  V30 4075 H  103.4476 -7.9826 28.3203 0
M  V30 4076 H  105.0756 -8.5758 28.2459 0
M  V30 4077 C  104.2146 -8.3238 26.3436 0
M  V30 4078 C  105.1565 -8.9841 25.5273 0
M  V30 4079 H  105.7738 -9.7714 25.9353 0
M  V30 4080 C  103.4101 -7.3049 25.7937 0
M  V30 4081 H  102.6953 -6.7769 26.4029 0
M  V30 4082 C  105.2935 -8.6261 24.1734 0
M  V30 4083 H  106.0027 -9.1490 23.5509 0
M  V30 4084 C  103.5429 -6.9498 24.4393 0
M  V30 4085 H  102.9254 -6.1634 24.0321 0
M  V30 4086 C  104.4903 -7.6049 23.6311 0
M  V30 4087 O  104.6240 -7.2540 22.3217 0
M  V30 4088 H  103.9702 -6.6062 22.0467 0
M  V30 4089 N  104.8923 -11.1803 29.8430 0
M  V30 4090 H  105.5052 -11.4556 29.0900 0
M  V30 4091 C  105.3804 -11.4886 31.1929 0 CFG=2
M  V30 4092 H  104.5735 -12.0028 31.7194 0
M  V30 4093 C  105.7141 -10.1887 31.9578 0
M  V30 4094 O  106.0098 -9.1771 31.3288 0
M  V30 4095 C  106.6135 -12.4258 31.1020 0
M  V30 4096 H  106.3806 -13.2668 30.4481 0
M  V30 4097 H  107.4315 -11.8712 30.6391 0
M  V30 4098 C  107.1272 -13.0003 32.4322 0
M  V30 4099 O  106.3383 -13.0585 33.4027 0
M  V30 4100 O  108.3010 -13.4273 32.4334 0 CHG=-1
M  V30 4101 N  105.6713 -10.2483 33.2959 0
M  V30 4102 H  105.4757 -11.1462 33.7197 0
M  V30 4103 C  105.8764 -9.1369 34.2295 0 CFG=2
M  V30 4104 H  105.0469 -8.4454 34.0755 0
M  V30 4105 C  107.1792 -8.3218 34.0392 0
M  V30 4106 O  107.1262 -7.1174 34.2833 0
M  V30 4107 C  105.8193 -9.6339 35.6981 0 CFG=2
M  V30 4108 H  105.9480 -8.7799 36.3663 0
M  V30 4109 O  106.8665 -10.5446 35.9819 0
M  V30 4110 H  106.7183 -11.3521 35.4800 0
M  V30 4111 C  104.4849 -10.3060 36.0555 0
M  V30 4112 H  104.4634 -10.5906 37.1078 0
M  V30 4113 H  103.6487 -9.6282 35.8815 0
M  V30 4114 H  104.3112 -11.2074 35.4669 0
M  V30 4115 N  108.2868 -8.9345 33.5704 0
M  V30 4116 H  108.2829 -9.9296 33.3964 0
M  V30 4117 C  109.5227 -8.2030 33.2539 0 CFG=2
M  V30 4118 H  109.6339 -7.4086 33.9941 0
M  V30 4119 C  109.4792 -7.5211 31.8769 0
M  V30 4120 O  110.0463 -6.4396 31.7361 0
M  V30 4121 C  110.7704 -9.1031 33.4042 0
M  V30 4122 H  111.6344 -8.4521 33.5517 0
M  V30 4123 H  110.6738 -9.6670 34.3308 0
M  V30 4124 C  111.0813 -10.1054 32.2693 0
M  V30 4125 H  110.3520 -10.9162 32.2661 0
M  V30 4126 H  111.0357 -9.6361 31.2878 0
M  V30 4127 C  112.4861 -10.6845 32.4247 0
M  V30 4128 O  113.3014 -10.4594 31.5016 0
M  V30 4129 O  112.7534 -11.2914 33.4836 0 CHG=-1
M  V30 4130 N  108.8299 -8.1654 30.8924 0
M  V30 4131 H  108.3565 -9.0336 31.0984 0
M  V30 4132 C  108.7179 -7.6726 29.5188 0 CFG=2
M  V30 4133 H  109.6703 -7.2246 29.2350 0
M  V30 4134 C  107.6377 -6.5844 29.3909 0
M  V30 4135 O  107.8355 -5.6329 28.6398 0
M  V30 4136 C  108.4104 -8.8202 28.5213 0 CFG=2
M  V30 4137 H  107.4869 -9.3224 28.8149 0
M  V30 4138 O  109.4497 -9.7781 28.5994 0
M  V30 4139 H  109.4206 -10.1927 29.4655 0
M  V30 4140 C  108.2919 -8.3920 27.0463 0
M  V30 4141 H  108.1928 -9.2588 26.3922 0
M  V30 4142 H  107.4183 -7.7637 26.8765 0
M  V30 4143 H  109.1715 -7.8338 26.7242 0
M  V30 4144 N  106.5559 -6.7101 30.1753 0
M  V30 4145 H  106.4580 -7.5420 30.7460 0
M  V30 4146 C  105.5164 -5.7048 30.3517 0 CFG=2
M  V30 4147 H  105.1576 -5.4408 29.3574 0
M  V30 4148 C  106.0552 -4.4264 31.0077 0
M  V30 4149 O  105.7602 -3.3434 30.5102 0
M  V30 4150 C  104.3587 -6.3070 31.1630 0
M  V30 4151 H  103.5954 -5.5622 31.3879 0
M  V30 4152 H  103.8742 -7.1169 30.6169 0
M  V30 4153 H  104.7087 -6.7152 32.1114 0
M  V30 4154 N  106.8881 -4.5784 32.0545 0
M  V30 4155 H  107.0708 -5.5073 32.4079 0
M  V30 4156 C  107.6618 -3.4987 32.6766 0 CFG=2
M  V30 4157 H  106.9482 -2.7259 32.9700 0
M  V30 4158 C  108.6617 -2.8383 31.7017 0
M  V30 4159 O  108.7874 -1.6157 31.7246 0
M  V30 4160 C  108.3920 -4.0053 33.9636 0
M  V30 4161 H  108.6800 -5.0415 33.7860 0
M  V30 4162 C  109.6942 -3.2861 34.3724 0
M  V30 4163 H  110.0497 -3.6527 35.3354 0
M  V30 4164 H  110.4957 -3.4634 33.6571 0
M  V30 4165 H  109.5538 -2.2099 34.4570 0
M  V30 4166 C  107.4280 -4.0209 35.1626 0
M  V30 4167 H  107.8863 -4.4901 36.0336 0
M  V30 4168 H  107.1293 -3.0112 35.4465 0
M  V30 4169 H  106.5234 -4.5807 34.9379 0
M  V30 4170 N  109.3240 -3.6418 30.8505 0
M  V30 4171 H  109.1859 -4.6419 30.9023 0
M  V30 4172 C  110.3112 -3.1724 29.8780 0 CFG=2
M  V30 4173 H  110.9842 -2.5181 30.4281 0
M  V30 4174 C  109.6985 -2.3223 28.7509 0
M  V30 4175 O  110.2424 -1.2605 28.4521 0
M  V30 4176 C  111.1453 -4.3661 29.3649 0
M  V30 4177 H  111.5387 -4.8931 30.2334 0
M  V30 4178 H  110.5033 -5.0751 28.8435 0
M  V30 4179 C  112.3263 -3.9853 28.4513 0
M  V30 4180 H  111.8861 -3.5524 27.5533 0
M  V30 4181 H  112.9589 -3.2086 28.8813 0
M  V30 4182 C  113.1737 -5.1814 27.9873 0
M  V30 4183 H  112.7377 -5.7464 27.1636 0
M  V30 4184 H  114.0891 -4.7499 27.5814 0
M  V30 4185 N  113.6855 -5.9879 29.1060 0
M  V30 4186 H  114.3775 -5.5299 29.6820 0
M  V30 4187 C  113.2589 -7.2093 29.4766 0
M  V30 4188 N  113.8004 -7.7917 30.5531 0
M  V30 4189 H  113.5114 -8.7252 30.8408 0
M  V30 4190 H  114.4935 -7.3079 31.1028 0
M  V30 4191 N  112.3120 -7.8641 28.7905 0 CHG=1
M  V30 4192 H  112.0052 -8.7807 29.0876 0
M  V30 4193 H  111.8839 -7.4396 27.9818 0
M  V30 4194 N  108.5680 -2.7764 28.1806 0
M  V30 4195 H  108.1806 -3.6629 28.4788 0
M  V30 4196 C  107.8066 -2.0454 27.1613 0 CFG=2
M  V30 4197 H  108.5172 -1.6930 26.4122 0
M  V30 4198 C  107.0898 -0.8045 27.7281 0
M  V30 4199 O  106.9454 0.1682 26.9899 0
M  V30 4200 C  106.8155 -2.9876 26.4454 0
M  V30 4201 H  106.1203 -3.3898 27.1841 0
M  V30 4202 H  106.2144 -2.4182 25.7352 0
M  V30 4203 C  107.4904 -4.1572 25.7016 0
M  V30 4204 H  108.1327 -3.7200 24.9361 0
M  V30 4205 H  108.1598 -4.7228 26.3459 0
M  V30 4206 C  106.4974 -5.1213 25.0271 0
M  V30 4207 H  106.8224 -6.1513 25.1570 0
M  V30 4208 H  105.5317 -5.0781 25.5207 0
M  V30 4209 N  106.2657 -4.8231 23.6021 0
M  V30 4210 H  106.8995 -5.2959 22.9692 0
M  V30 4211 C  105.3014 -4.0649 23.0496 0
M  V30 4212 N  105.2249 -3.9767 21.7169 0
M  V30 4213 H  104.4935 -3.4260 21.2911 0
M  V30 4214 H  105.8137 -4.5523 21.1217 0
M  V30 4215 N  104.3911 -3.4108 23.7781 0 CHG=1
M  V30 4216 H  103.6683 -2.8607 23.3383 0
M  V30 4217 H  104.3285 -3.5508 24.7850 0
M  V30 4218 N  106.7036 -0.8289 29.0188 0
M  V30 4219 H  106.8415 -1.6693 29.5635 0
M  V30 4220 C  106.1390 0.3222 29.7331 0 CFG=2
M  V30 4221 H  105.3345 0.7307 29.1196 0
M  V30 4222 C  107.1774 1.4395 29.9508 0
M  V30 4223 O  106.8392 2.6015 29.7393 0
M  V30 4224 C  105.5510 -0.0717 31.1169 0 CFG=2
M  V30 4225 H  106.2930 -0.6416 31.6760 0
M  V30 4226 O  104.4450 -0.9233 30.9204 0
M  V30 4227 H  104.7672 -1.7652 30.5803 0
M  V30 4228 C  105.0647 1.0851 32.0079 0
M  V30 4229 H  104.5927 0.6989 32.9112 0
M  V30 4230 H  105.8842 1.7263 32.3318 0
M  V30 4231 H  104.3335 1.7071 31.4914 0
M  V30 4232 N  108.4166 1.0783 30.3308 0
M  V30 4233 H  108.6235 0.1035 30.5056 0
M  V30 4234 C  109.5323 2.0158 30.5029 0 CFG=2
M  V30 4235 H  109.1639 2.8349 31.1203 0
M  V30 4236 C  110.0023 2.6355 29.1632 0
M  V30 4237 O  110.4099 3.7956 29.1542 0
M  V30 4238 C  110.7172 1.3484 31.2713 0
M  V30 4239 H  110.8894 0.3670 30.8254 0
M  V30 4240 C  112.0627 2.1028 31.2297 0
M  V30 4241 H  112.8174 1.5866 31.8238 0
M  V30 4242 H  112.4623 2.1762 30.2214 0
M  V30 4243 H  111.9630 3.1138 31.6262 0
M  V30 4244 C  110.3442 1.1198 32.7500 0
M  V30 4245 H  111.1102 0.5395 33.2656 0
M  V30 4246 H  110.2378 2.0670 33.2802 0
M  V30 4247 H  109.4027 0.5845 32.8603 0
M  V30 4248 N  109.8804 1.8796 28.0575 0
M  V30 4249 H  109.5483 0.9295 28.1512 0
M  V30 4250 C  110.1672 2.3228 26.6880 0 CFG=2
M  V30 4251 H  111.1047 2.8780 26.7057 0
M  V30 4252 C  109.1196 3.3022 26.1079 0
M  V30 4253 O  109.4910 4.1192 25.2654 0
M  V30 4254 C  110.3627 1.0886 25.7466 0 CFG=2
M  V30 4255 H  109.5696 0.3824 25.9922 0
M  V30 4256 C  111.7083 0.3879 26.0553 0
M  V30 4257 H  112.5272 0.9826 25.6498 0
M  V30 4258 H  111.8816 0.3554 27.1308 0
M  V30 4259 C  110.2537 1.3512 24.2253 0
M  V30 4260 H  110.4431 0.4453 23.6503 0
M  V30 4261 H  109.2584 1.6883 23.9348 0
M  V30 4262 H  110.9748 2.1021 23.9006 0
M  V30 4263 C  111.8110 -1.0456 25.5117 0
M  V30 4264 H  112.4738 -1.6468 26.1321 0
M  V30 4265 H  110.8415 -1.5438 25.4943 0
M  V30 4266 H  112.2120 -1.0544 24.4982 0
M  V30 4267 N  107.8560 3.2204 26.5607 0
M  V30 4268 H  107.6238 2.5354 27.2660 0
M  V30 4269 C  106.7412 4.0259 26.0508 0 CFG=2
M  V30 4270 H  107.0467 4.5565 25.1469 0
M  V30 4271 C  106.3374 5.1074 27.0781 0
M  V30 4272 O  106.7279 6.2600 26.8928 0
M  V30 4273 C  105.5252 3.1375 25.6550 0 CFG=2
M  V30 4274 H  104.6910 3.7811 25.3714 0
M  V30 4275 O  105.0713 2.3171 26.7167 0
M  V30 4276 H  105.6434 1.5432 26.7685 0
M  V30 4277 C  105.8408 2.2205 24.4623 0
M  V30 4278 H  104.9782 1.6109 24.1925 0
M  V30 4279 H  106.1117 2.8064 23.5837 0
M  V30 4280 H  106.6693 1.5446 24.6745 0
M  V30 4281 N  105.5775 4.7477 28.1269 0
M  V30 4282 H  105.2966 3.7793 28.2095 0
M  V30 4283 C  105.0869 5.6542 29.1684 0 CFG=2
M  V30 4284 H  104.6060 6.4962 28.6669 0
M  V30 4285 C  106.1876 6.2340 30.0754 0
M  V30 4286 O  106.0461 7.3745 30.5120 0
M  V30 4287 C  104.0137 4.9361 30.0001 0
M  V30 4288 H  103.6161 5.5851 30.7814 0
M  V30 4289 H  103.1727 4.6363 29.3749 0
M  V30 4290 H  104.4093 4.0399 30.4798 0
M  V30 4291 N  107.2686 5.4705 30.3155 0
M  V30 4292 H  107.2993 4.5312 29.9393 0
M  V30 4293 C  108.4247 5.9177 31.0947 0
M  V30 4294 H  108.0943 6.4025 32.0138 0
M  V30 4295 H  109.0209 5.0575 31.3925 0
M  V30 4296 C  109.3116 6.8776 30.2871 0
M  V30 4297 O  109.9088 7.7753 30.8776 0
M  V30 4298 N  109.3629 6.7233 28.9502 0
M  V30 4299 H  108.8657 5.9532 28.5264 0
M  V30 4300 C  110.0331 7.6415 28.0251 0 CFG=2
M  V30 4301 H  111.0133 7.8799 28.4403 0
M  V30 4302 C  109.2618 8.9650 27.8676 0
M  V30 4303 O  109.8980 10.0086 27.7345 0
M  V30 4304 C  110.2541 6.9313 26.6715 0
M  V30 4305 H  110.8173 6.0122 26.8427 0
M  V30 4306 H  109.2871 6.6257 26.2722 0
M  V30 4307 C  110.9798 7.7689 25.5983 0
M  V30 4308 H  110.4944 8.7219 25.3877 0
M  V30 4309 H  111.9555 8.0131 26.0196 0
M  V30 4310 C  111.2083 6.9881 24.2949 0
M  V30 4311 H  112.0314 6.2980 24.4844 0
M  V30 4312 H  110.3611 6.3702 23.9968 0
M  V30 4313 N  111.7294 7.8425 23.2163 0
M  V30 4314 H  112.7321 7.8270 23.0955 0
M  V30 4315 C  111.0059 8.6640 22.4339 0
M  V30 4316 N  111.6206 9.3811 21.4844 0
M  V30 4317 H  111.0879 10.0054 20.8928 0
M  V30 4318 H  112.6201 9.3179 21.3553 0
M  V30 4319 N  109.6787 8.7843 22.5795 0 CHG=1
M  V30 4320 H  109.1582 9.4231 21.9929 0
M  V30 4321 H  109.1983 8.2577 23.2947 0
M  V30 4322 N  107.9189 8.9012 27.9154 0
M  V30 4323 H  107.4729 8.0001 28.0177 0
M  V30 4324 C  107.0276 10.0648 27.8894 0 CFG=2
M  V30 4325 H  107.3377 10.7095 27.0648 0
M  V30 4326 C  107.1064 10.8853 29.1942 0
M  V30 4327 O  107.0614 12.1120 29.1313 0
M  V30 4328 C  105.5502 9.6495 27.6520 0 CFG=2
M  V30 4329 H  105.2303 8.9739 28.4462 0
M  V30 4330 O  105.4607 8.9293 26.4373 0
M  V30 4331 H  105.9515 8.1068 26.5281 0
M  V30 4332 C  104.5439 10.8138 27.5717 0
M  V30 4333 H  103.5496 10.4551 27.3034 0
M  V30 4334 H  104.4459 11.3347 28.5238 0
M  V30 4335 H  104.8443 11.5462 26.8216 0
M  V30 4336 N  107.2762 10.1970 30.3364 0
M  V30 4337 H  107.2749 9.1865 30.3077 0
M  V30 4338 C  107.5206 10.7921 31.6512 0 CFG=2
M  V30 4339 H  106.8067 11.6079 31.7755 0
M  V30 4340 C  108.9306 11.4088 31.7817 0
M  V30 4341 O  109.0632 12.4463 32.4295 0
M  V30 4342 C  107.2561 9.7487 32.7773 0
M  V30 4343 H  107.6024 8.7783 32.4195 0
M  V30 4344 C  107.9765 9.9785 34.1194 0
M  V30 4345 H  107.6735 9.2168 34.8307 0
M  V30 4346 H  109.0607 9.8991 34.0330 0
M  V30 4347 H  107.7351 10.9529 34.5440 0
M  V30 4348 C  105.7411 9.6161 33.0239 0
M  V30 4349 H  105.5177 8.8831 33.7984 0
M  V30 4350 H  105.3135 10.5649 33.3454 0
M  V30 4351 H  105.2119 9.3112 32.1217 0
M  V30 4352 N  109.9414 10.7959 31.1392 0
M  V30 4353 H  109.7659 9.9332 30.6430 0
M  V30 4354 C  111.3037 11.3347 31.0503 0 CFG=2
M  V30 4355 H  111.6085 11.6494 32.0511 0
M  V30 4356 C  111.3739 12.5711 30.1280 0
M  V30 4357 O  112.0986 13.5118 30.4520 0
M  V30 4358 C  112.3129 10.2661 30.5486 0 CFG=2
M  V30 4359 H  111.9602 9.8483 29.6049 0
M  V30 4360 O  112.3497 9.2035 31.4812 0
M  V30 4361 H  111.4918 8.7661 31.4812 0
M  V30 4362 C  113.7620 10.7516 30.3532 0
M  V30 4363 H  114.4292 9.9169 30.1373 0
M  V30 4364 H  113.8497 11.4508 29.5218 0
M  V30 4365 H  114.1352 11.2472 31.2499 0
M  V30 4366 N  110.5682 12.5772 29.0486 0
M  V30 4367 H  110.0241 11.7522 28.8347 0
M  V30 4368 C  110.3039 13.7479 28.2115 0 CFG=2
M  V30 4369 H  111.2743 14.1292 27.8916 0
M  V30 4370 C  109.6293 14.8980 28.9800 0
M  V30 4371 O  110.1033 16.0270 28.8925 0
M  V30 4372 C  109.5624 13.3495 26.9104 0
M  V30 4373 H  110.2866 12.9439 26.2025 0
M  V30 4374 H  108.8604 12.5408 27.1097 0
M  V30 4375 C  108.8037 14.4740 26.2208 0
M  V30 4376 C  109.5035 15.4652 25.4994 0
M  V30 4377 H  110.5682 15.3759 25.3410 0
M  V30 4378 C  107.4308 14.6655 26.4903 0
M  V30 4379 H  106.8885 13.9579 27.1003 0
M  V30 4380 C  108.8258 16.5703 25.0053 0
M  V30 4381 H  109.3595 17.3253 24.4503 0
M  V30 4382 C  106.7791 15.7897 26.0073 0
M  V30 4383 H  105.7353 15.9449 26.2367 0
M  V30 4384 C  107.4689 16.7262 25.2508 0
M  V30 4385 H  106.9491 17.5937 24.8759 0
M  V30 4386 N  108.5541 14.5806 29.7217 0
M  V30 4387 H  108.2114 13.6288 29.7079 0
M  V30 4388 C  107.7913 15.5149 30.5526 0 CFG=2
M  V30 4389 H  107.4002 16.2938 29.8949 0
M  V30 4390 C  108.6543 16.1981 31.6284 0
M  V30 4391 O  108.4787 17.3927 31.8662 0
M  V30 4392 C  106.5999 14.7638 31.1780 0
M  V30 4393 H  105.9505 14.3585 30.4016 0
M  V30 4394 H  106.9452 13.9215 31.7747 0
M  V30 4395 O  105.8330 15.5996 32.0171 0
M  V30 4396 H  105.1915 16.0841 31.4776 0
M  V30 4397 N  109.5921 15.4335 32.2168 0
M  V30 4398 H  109.6499 14.4534 31.9751 0
M  V30 4399 C  110.5657 15.9070 33.1930 0 CFG=2
M  V30 4400 H  109.9968 16.3224 34.0240 0
M  V30 4401 C  111.4692 17.0095 32.6257 0
M  V30 4402 O  111.4853 18.1006 33.1892 0
M  V30 4403 C  111.3859 14.7251 33.7285 0
M  V30 4404 H  111.9950 15.0242 34.5823 0
M  V30 4405 H  110.7299 13.9222 34.0576 0
M  V30 4406 H  112.0523 14.3096 32.9732 0
M  V30 4407 N  112.1547 16.7308 31.5016 0
M  V30 4408 H  112.0754 15.8189 31.0722 0
M  V30 4409 C  113.0432 17.6932 30.8436 0 CFG=2
M  V30 4410 H  113.6665 18.1349 31.6229 0
M  V30 4411 C  112.3066 18.8619 30.1530 0
M  V30 4412 O  112.9099 19.9237 30.0293 0
M  V30 4413 C  114.0081 17.0296 29.8199 0
M  V30 4414 H  114.6595 17.8177 29.4374 0
M  V30 4415 C  114.9423 16.0170 30.5041 0
M  V30 4416 H  115.6722 15.6171 29.7997 0
M  V30 4417 H  115.4963 16.4816 31.3202 0
M  V30 4418 H  114.3876 15.1736 30.9165 0
M  V30 4419 C  113.3323 16.4004 28.5884 0
M  V30 4420 H  114.0738 15.9834 27.9069 0
M  V30 4421 H  112.6784 15.5866 28.8879 0
M  V30 4422 H  112.7432 17.1189 28.0185 0
M  V30 4423 N  111.0352 18.6749 29.7501 0
M  V30 4424 H  110.6091 17.7638 29.8607 0
M  V30 4425 C  110.1990 19.7057 29.1258 0 CFG=2
M  V30 4426 H  110.8067 20.1998 28.3673 0
M  V30 4427 C  109.7429 20.7765 30.1343 0
M  V30 4428 O  109.8308 21.9665 29.8295 0
M  V30 4429 C  108.9890 19.0460 28.4228 0
M  V30 4430 H  109.3188 18.1937 27.8291 0
M  V30 4431 H  108.3289 18.6328 29.1877 0
M  V30 4432 C  108.1894 19.9948 27.5005 0
M  V30 4433 H  108.0486 20.9540 27.9985 0
M  V30 4434 C  108.9535 20.2697 26.1961 0
M  V30 4435 H  108.3082 20.7087 25.4355 0
M  V30 4436 H  109.7692 20.9653 26.3734 0
M  V30 4437 H  109.3900 19.3623 25.7800 0
M  V30 4438 C  106.7746 19.4631 27.2200 0
M  V30 4439 H  106.5356 19.4428 26.1572 0
M  V30 4440 H  106.6242 18.4553 27.6085 0
M  V30 4441 H  106.0373 20.1085 27.6940 0
M  V30 4442 N  109.2768 20.3345 31.3152 0
M  V30 4443 H  109.2131 19.3392 31.4873 0
M  V30 4444 C  108.8400 21.2068 32.4082 0 CFG=2
M  V30 4445 H  108.2188 21.9939 31.9749 0
M  V30 4446 C  110.0338 21.9012 33.1010 0
M  V30 4447 O  109.9016 23.0643 33.4791 0
M  V30 4448 C  107.9644 20.4334 33.4423 0 CFG=2
M  V30 4449 H  108.5148 19.5324 33.7175 0
M  V30 4450 C  106.6321 19.9802 32.7928 0
M  V30 4451 H  105.9791 20.8439 32.6594 0
M  V30 4452 H  106.8048 19.5928 31.7885 0
M  V30 4453 C  107.6662 21.2042 34.7501 0
M  V30 4454 H  107.0150 20.6311 35.4095 0
M  V30 4455 H  108.5691 21.4175 35.3219 0
M  V30 4456 H  107.1689 22.1525 34.5431 0
M  V30 4457 C  105.8831 18.8983 33.5856 0
M  V30 4458 H  105.2627 19.3394 34.3644 0
M  V30 4459 H  105.2243 18.3270 32.9313 0
M  V30 4460 H  106.5686 18.1944 34.0583 0
M  V30 4461 N  111.1878 21.2128 33.1881 0
M  V30 4462 H  111.2147 20.2516 32.8742 0
M  V30 4463 C  112.4691 21.7790 33.6257 0 CFG=2
M  V30 4464 H  112.2955 22.2837 34.5777 0
M  V30 4465 C  113.0131 22.8345 32.6345 0
M  V30 4466 O  113.5268 23.8545 33.0876 0
M  V30 4467 C  113.5305 20.6594 33.8599 0
M  V30 4468 H  113.4776 19.9872 33.0039 0
M  V30 4469 C  114.9993 21.1266 33.9619 0
M  V30 4470 H  115.6543 20.2983 34.2336 0
M  V30 4471 H  115.3739 21.5213 33.0169 0
M  V30 4472 H  115.1158 21.8997 34.7214 0
M  V30 4473 C  113.1876 19.8201 35.1067 0
M  V30 4474 H  113.7640 18.8949 35.1265 0
M  V30 4475 H  113.4062 20.3554 36.0261 0
M  V30 4476 H  112.1339 19.5511 35.1455 0
M  V30 4477 N  112.8494 22.6001 31.3184 0
M  V30 4478 H  112.4382 21.7259 31.0199 0
M  V30 4479 C  113.2177 23.5269 30.2403 0 CFG=2
M  V30 4480 H  114.2459 23.8489 30.4141 0
M  V30 4481 C  112.3505 24.7979 30.1751 0
M  V30 4482 O  112.8285 25.8185 29.6804 0
M  V30 4483 C  113.1826 22.7847 28.8964 0
M  V30 4484 H  113.3281 23.4617 28.0582 0
M  V30 4485 H  113.9747 22.0380 28.8453 0
M  V30 4486 H  112.2316 22.2787 28.7351 0
M  V30 4487 N  111.1152 24.7251 30.6966 0
M  V30 4488 H  110.7829 23.8416 31.0570 0
M  V30 4489 C  110.2302 25.8751 30.8771 0 CFG=2
M  V30 4490 H  110.3568 26.5688 30.0432 0
M  V30 4491 C  110.5541 26.6450 32.1714 0
M  V30 4492 O  110.4776 27.8736 32.1734 0
M  V30 4493 C  108.7684 25.3920 30.8910 0
M  V30 4494 H  108.6197 24.5688 31.5905 0
M  V30 4495 H  108.1073 26.1990 31.2031 0
M  V30 4496 O  108.3663 24.9943 29.5982 0
M  V30 4497 H  108.8262 24.1796 29.3755 0
M  V30 4498 N  110.9088 25.9081 33.2401 0
M  V30 4499 H  110.9383 24.9008 33.1561 0
M  V30 4500 C  111.1736 26.4392 34.5764 0 CFG=2
M  V30 4501 H  110.4079 27.1846 34.7935 0
M  V30 4502 C  112.5415 27.1242 34.7267 0
M  V30 4503 O  112.6357 28.0638 35.5097 0
M  V30 4504 C  111.0248 25.3099 35.6089 0
M  V30 4505 H  111.1688 25.6785 36.6252 0
M  V30 4506 H  110.0286 24.8686 35.5669 0
M  V30 4507 H  111.7496 24.5127 35.4395 0
M  V30 4508 N  113.5712 26.6616 33.9959 0
M  V30 4509 H  113.4242 25.8683 33.3850 0
M  V30 4510 C  114.9576 27.1411 34.0993 0 CFG=2
M  V30 4511 H  115.2271 27.0827 35.1560 0
M  V30 4512 C  115.1691 28.6117 33.6621 0
M  V30 4513 O  116.1205 29.2383 34.1288 0
M  V30 4514 C  115.9251 26.2135 33.3037 0 CFG=2
M  V30 4515 H  115.6993 25.2002 33.6373 0
M  V30 4516 C  117.4169 26.4505 33.6360 0
M  V30 4517 H  117.7746 27.3567 33.1462 0
M  V30 4518 H  117.5297 26.6238 34.7055 0
M  V30 4519 C  115.6956 26.2451 31.7781 0
M  V30 4520 H  116.2468 25.4497 31.2770 0
M  V30 4521 H  114.6438 26.1041 31.5408 0
M  V30 4522 H  116.0097 27.1905 31.3351 0
M  V30 4523 C  118.3303 25.2798 33.2456 0
M  V30 4524 H  119.2957 25.3610 33.7456 0
M  V30 4525 H  117.8953 24.3197 33.5248 0
M  V30 4526 H  118.5173 25.2649 32.1717 0
M  V30 4527 N  114.2605 29.1542 32.8293 0
M  V30 4528 H  113.4977 28.5795 32.4997 0
M  V30 4529 C  114.2790 30.5500 32.3829 0
M  V30 4530 H  115.2556 30.7895 31.9587 0
M  V30 4531 H  113.5497 30.6697 31.5818 0
M  V30 4532 C  113.9483 31.5427 33.5152 0
M  V30 4533 O  114.3124 32.7126 33.4072 0
M  V30 4534 N  113.3015 31.0859 34.6048 0
M  V30 4535 H  113.0338 30.1114 34.6450 0
M  V30 4536 C  113.0051 31.8738 35.8078 0 CFG=2
M  V30 4537 H  112.5552 32.8095 35.4824 0
M  V30 4538 C  114.2533 32.2202 36.6485 0
M  V30 4539 O  114.1745 33.1347 37.4678 0
M  V30 4540 C  111.9929 31.1071 36.6837 0
M  V30 4541 H  112.3865 30.1047 36.8013 0
M  V30 4542 H  111.9534 31.5221 37.6928 0
M  V30 4543 C  110.5547 31.0261 36.1304 0
M  V30 4544 H  110.6104 30.8272 35.0591 0
M  V30 4545 C  109.7703 29.8523 36.7554 0
M  V30 4546 H  109.7254 29.0125 36.0636 0
M  V30 4547 H  110.2335 29.4894 37.6718 0
M  V30 4548 H  108.7401 30.1085 37.0005 0
M  V30 4549 C  109.8195 32.3656 36.3194 0
M  V30 4550 H  108.9358 32.2793 36.9489 0
M  V30 4551 H  110.4484 33.1185 36.7904 0
M  V30 4552 H  109.4997 32.7603 35.3581 0
M  V30 4553 N  115.3756 31.5070 36.4400 0
M  V30 4554 H  115.3720 30.7663 35.7518 0
M  V30 4555 C  116.6491 31.7367 37.1335 0 CFG=2
M  V30 4556 H  116.4309 31.9110 38.1885 0
M  V30 4557 C  117.3999 32.9886 36.6416 0
M  V30 4558 O  118.2927 33.4541 37.3494 0
M  V30 4559 C  117.5457 30.4824 37.0164 0
M  V30 4560 H  117.8040 30.3223 35.9685 0
M  V30 4561 H  118.4904 30.6645 37.5315 0
M  V30 4562 C  116.9152 29.1948 37.5893 0
M  V30 4563 H  116.0220 28.9924 37.0002 0
M  V30 4564 C  117.8340 27.9740 37.3985 0
M  V30 4565 H  117.2713 27.1267 37.0062 0
M  V30 4566 H  118.6458 28.1781 36.6997 0
M  V30 4567 H  118.2900 27.6540 38.3357 0
M  V30 4568 C  116.4827 29.3524 39.0581 0
M  V30 4569 H  116.4575 28.3964 39.5804 0
M  V30 4570 H  117.1497 30.0142 39.6110 0
M  V30 4571 H  115.4789 29.7728 39.1116 0
M  V30 4572 N  117.0135 33.5263 35.4702 0
M  V30 4573 H  116.2730 33.0782 34.9484 0
M  V30 4574 C  117.5212 34.7799 34.9039 0 CFG=2
M  V30 4575 H  118.6111 34.7317 34.8868 0
M  V30 4576 C  117.1185 36.0128 35.7333 0
M  V30 4577 O  117.8790 36.9792 35.7807 0
M  V30 4578 C  116.9868 34.9397 33.4643 0
M  V30 4579 H  115.8970 34.9942 33.5042 0
M  V30 4580 H  117.3137 35.8960 33.0544 0
M  V30 4581 C  117.3980 33.8206 32.4842 0
M  V30 4582 H  117.0836 32.8659 32.9077 0
M  V30 4583 C  116.6322 33.9678 31.1567 0
M  V30 4584 H  116.0799 33.0557 30.9345 0
M  V30 4585 H  115.9094 34.7837 31.1835 0
M  V30 4586 H  117.2909 34.1644 30.3147 0
M  V30 4587 C  118.9258 33.7446 32.2792 0
M  V30 4588 H  119.2062 33.6086 31.2346 0
M  V30 4589 H  119.4304 34.6445 32.6315 0
M  V30 4590 H  119.3431 32.9008 32.8296 0
M  V30 4591 N  115.9358 35.9432 36.3666 0
M  V30 4592 H  115.3859 35.1001 36.2796 0
M  V30 4593 C  115.3602 36.9799 37.2182 0 CFG=2
M  V30 4594 H  115.4191 37.9137 36.6631 0
M  V30 4595 C  116.1106 37.0648 38.5661 0
M  V30 4596 O  116.3746 36.0147 39.1557 0
M  V30 4597 C  113.8858 36.6075 37.4658 0
M  V30 4598 H  113.8392 35.6540 37.9923 0
M  V30 4599 H  113.4325 37.3324 38.1375 0
M  V30 4600 C  113.0096 36.5309 36.2253 0
M  V30 4601 C  112.9848 37.5925 35.3013 0
M  V30 4602 H  113.6070 38.4590 35.4586 0
M  V30 4603 C  112.1251 35.4500 36.0369 0
M  V30 4604 H  112.0954 34.6493 36.7588 0
M  V30 4605 C  112.1509 37.5311 34.1951 0
M  V30 4606 H  112.1495 38.3373 33.4853 0
M  V30 4607 C  111.2922 35.4123 34.9264 0
M  V30 4608 H  110.6252 34.5800 34.7730 0
M  V30 4609 C  111.3112 36.4450 34.0023 0
M  V30 4610 H  110.6632 36.4074 33.1391 0
M  V30 4611 N  116.4508 38.2916 39.0304 0
M  V30 4612 C  117.2355 38.4884 40.2674 0 CFG=2
M  V30 4613 H  118.1348 37.8707 40.2331 0
M  V30 4614 C  116.5099 38.1631 41.5915 0
M  V30 4615 O  117.1850 38.0530 42.6142 0
M  V30 4616 C  117.6437 39.9679 40.1963 0
M  V30 4617 H  117.8049 40.4270 41.1726 0
M  V30 4618 H  118.5773 40.0615 39.6400 0
M  V30 4619 C  116.5186 40.6319 39.4197 0
M  V30 4620 H  115.6722 40.8042 40.0855 0
M  V30 4621 H  116.7989 41.5876 38.9764 0
M  V30 4622 C  116.1502 39.5747 38.3879 0
M  V30 4623 H  115.1066 39.6715 38.0857 0
M  V30 4624 H  116.7762 39.6798 37.5002 0
M  V30 4625 N  115.1756 38.0023 41.5560 0
M  V30 4626 H  114.6891 38.1309 40.6792 0
M  V30 4627 C  114.3258 37.6713 42.7003 0 CFG=2
M  V30 4628 H  114.5178 38.4104 43.4808 0
M  V30 4629 C  114.6362 36.2745 43.2630 0
M  V30 4630 O  114.5125 35.2903 42.5337 0
M  V30 4631 C  112.8296 37.7602 42.3046 0
M  V30 4632 H  112.6308 37.1375 41.4305 0
M  V30 4633 H  112.2349 37.3189 43.1056 0
M  V30 4634 C  112.2813 39.1872 42.0812 0
M  V30 4635 H  111.1912 39.1522 42.0784 0
M  V30 4636 H  112.5645 39.8219 42.9202 0
M  V30 4637 C  112.7137 39.8524 40.7713 0
M  V30 4638 O  113.1046 39.1873 39.8167 0
M  V30 4639 N  112.6216 41.1784 40.7094 0
M  V30 4640 H  112.8660 41.6667 39.8593 0
M  V30 4641 H  112.2319 41.7032 41.4811 0
M  V30 4642 N  114.9754 36.2172 44.5631 0
M  V30 4643 H  115.0521 37.0817 45.0806 0
M  V30 4644 C  115.1794 34.9784 45.3224 0
M  V30 4645 H  115.9351 34.3647 44.8325 0
M  V30 4646 H  115.5646 35.2320 46.3102 0
M  V30 4647 C  113.8768 34.1732 45.4904 0
M  V30 4648 O  113.9365 32.9587 45.6769 0
M  V30 4649 N  112.7164 34.8444 45.3779 0
M  V30 4650 H  112.7641 35.8475 45.2548 0
M  V30 4651 C  111.3741 34.2756 45.2826 0 CFG=2
M  V30 4652 H  111.2183 33.6682 46.1749 0
M  V30 4653 C  111.2083 33.3226 44.0859 0
M  V30 4654 O  110.8600 32.1618 44.2959 0
M  V30 4655 C  110.3461 35.4340 45.3281 0
M  V30 4656 H  110.3342 35.8449 46.3383 0
M  V30 4657 H  110.6887 36.2512 44.6919 0
M  V30 4658 C  108.9032 35.1328 44.9544 0
M  V30 4659 C  108.0645 34.4293 45.8416 0
M  V30 4660 H  108.4329 34.1198 46.8060 0
M  V30 4661 C  108.4104 35.4779 43.6786 0
M  V30 4662 H  109.0483 35.9922 42.9775 0
M  V30 4663 C  106.7510 34.1567 45.4848 0
M  V30 4664 H  106.1018 33.6526 46.1824 0
M  V30 4665 C  107.0999 35.1756 43.3310 0
M  V30 4666 H  106.7235 35.4433 42.3545 0
M  V30 4667 C  106.2690 34.5300 44.2369 0
M  V30 4668 H  105.2488 34.3029 43.9639 0
M  V30 4669 N  111.5187 33.8138 42.8719 0
M  V30 4670 H  111.8326 34.7696 42.7870 0
M  V30 4671 C  111.4531 33.0446 41.6243 0 CFG=2
M  V30 4672 H  110.4795 32.5545 41.5980 0
M  V30 4673 C  112.5059 31.9324 41.5317 0
M  V30 4674 O  112.1947 30.8830 40.9719 0
M  V30 4675 C  111.5745 33.9869 40.4090 0
M  V30 4676 H  112.4428 34.6324 40.5543 0
M  V30 4677 H  111.7822 33.4169 39.5009 0
M  V30 4678 C  110.3188 34.8449 40.1626 0
M  V30 4679 H  110.0533 35.3028 41.1129 0
M  V30 4680 C  110.6256 36.0003 39.1942 0
M  V30 4681 H  109.8719 36.1245 38.4167 0
M  V30 4682 H  110.7035 36.9453 39.7289 0
M  V30 4683 H  111.5793 35.8525 38.6994 0
M  V30 4684 C  109.1117 33.9927 39.7053 0
M  V30 4685 H  108.7443 34.2744 38.7193 0
M  V30 4686 H  109.3524 32.9312 39.6434 0
M  V30 4687 H  108.2794 34.0953 40.4023 0
M  V30 4688 N  113.7057 32.1578 42.0956 0
M  V30 4689 H  113.8972 33.0545 42.5214 0
M  V30 4690 C  114.7694 31.1543 42.1768 0 CFG=2
M  V30 4691 H  114.9475 30.7834 41.1668 0
M  V30 4692 C  114.3703 29.9537 43.0502 0
M  V30 4693 O  114.5673 28.8205 42.6209 0
M  V30 4694 C  116.0733 31.7949 42.6883 0
M  V30 4695 H  115.8852 32.2769 43.6481 0
M  V30 4696 H  116.8093 31.0136 42.8832 0
M  V30 4697 C  116.7019 32.8008 41.7088 0
M  V30 4698 H  116.9797 32.2851 40.7890 0
M  V30 4699 H  115.9676 33.5495 41.4173 0
M  V30 4700 C  117.9381 33.4910 42.3101 0
M  V30 4701 H  117.7290 33.7877 43.3381 0
M  V30 4702 H  118.7570 32.7729 42.3700 0
M  V30 4703 C  118.4019 34.7289 41.5300 0
M  V30 4704 H  117.5991 35.4636 41.4902 0
M  V30 4705 H  119.2377 35.2013 42.0468 0
M  V30 4706 N  118.8251 34.4005 40.1587 0 CHG=1
M  V30 4707 H  118.0465 34.0134 39.6434 0
M  V30 4708 H  119.1345 35.2408 39.6919 0
M  V30 4709 H  119.5801 33.7305 40.1813 0
M  V30 4710 N  113.7796 30.2239 44.2273 0
M  V30 4711 H  113.6433 31.1870 44.5037 0
M  V30 4712 C  113.3038 29.2112 45.1730 0 CFG=2
M  V30 4713 H  114.1138 28.5006 45.3497 0
M  V30 4714 C  112.1047 28.4046 44.6496 0
M  V30 4715 O  112.0756 27.1919 44.8558 0
M  V30 4716 C  112.9481 29.8843 46.5052 0
M  V30 4717 H  112.2928 30.7400 46.3418 0
M  V30 4718 H  112.4180 29.1925 47.1609 0
M  V30 4719 O  114.1207 30.2937 47.1763 0
M  V30 4720 H  114.4578 31.0830 46.7419 0
M  V30 4721 N  111.1695 29.0807 43.9539 0
M  V30 4722 H  111.2613 30.0831 43.8547 0
M  V30 4723 C  110.0450 28.4741 43.2308 0 CFG=2
M  V30 4724 H  109.4359 27.9199 43.9476 0
M  V30 4725 C  110.5154 27.4857 42.1507 0
M  V30 4726 O  109.9201 26.4180 42.0218 0
M  V30 4727 C  109.1911 29.5829 42.5724 0
M  V30 4728 H  109.8652 30.2934 42.0955 0
M  V30 4729 H  108.5938 29.1711 41.7574 0
M  V30 4730 C  108.2469 30.3369 43.5324 0
M  V30 4731 H  108.7951 30.5679 44.4461 0
M  V30 4732 C  107.8099 31.6830 42.9180 0
M  V30 4733 H  108.3565 32.5048 43.3765 0
M  V30 4734 H  108.0032 31.7295 41.8459 0
M  V30 4735 H  106.7519 31.8959 43.0615 0
M  V30 4736 C  107.0393 29.4673 43.9379 0
M  V30 4737 H  107.1029 29.1806 44.9875 0
M  V30 4738 H  106.0824 29.9695 43.8034 0
M  V30 4739 H  106.9881 28.5546 43.3457 0
M  V30 4740 N  111.5841 27.8540 41.4236 0
M  V30 4741 H  112.0164 28.7502 41.6009 0
M  V30 4742 C  112.1924 27.0440 40.3700 0 CFG=2
M  V30 4743 H  111.3934 26.6804 39.7201 0
M  V30 4744 C  112.9571 25.8307 40.9151 0
M  V30 4745 O  112.8376 24.7570 40.3311 0
M  V30 4746 C  113.1839 27.8634 39.5149 0 CFG=2
M  V30 4747 H  113.9638 28.2791 40.1512 0
M  V30 4748 O  112.4961 28.9535 38.9582 0
M  V30 4749 H  112.2631 29.5668 39.6636 0
M  V30 4750 C  113.8486 27.0891 38.3659 0
M  V30 4751 H  114.3175 27.7623 37.6525 0
M  V30 4752 H  114.6256 26.4208 38.7345 0
M  V30 4753 H  113.1176 26.4950 37.8184 0
M  V30 4754 N  113.6965 26.0070 42.0251 0
M  V30 4755 H  113.7738 26.9269 42.4394 0
M  V30 4756 C  114.4000 24.9219 42.7122 0 CFG=2
M  V30 4757 H  115.0247 24.4075 41.9800 0
M  V30 4758 C  113.4215 23.8797 43.2744 0
M  V30 4759 O  113.6846 22.6900 43.1241 0
M  V30 4760 C  115.3044 25.4723 43.8365 0
M  V30 4761 H  114.6707 25.9529 44.5807 0
M  V30 4762 H  115.7955 24.6424 44.3457 0
M  V30 4763 C  116.3891 26.4742 43.4645 0
M  V30 4764 C  116.9766 26.4997 42.1792 0
M  V30 4765 H  116.6790 25.7954 41.4176 0
M  V30 4766 C  116.8160 27.4048 44.4366 0
M  V30 4767 H  116.3834 27.3923 45.4265 0
M  V30 4768 C  117.9553 27.4632 41.8664 0
M  V30 4769 H  118.3933 27.4829 40.8794 0
M  V30 4770 C  117.7923 28.3692 44.1228 0
M  V30 4771 H  118.0980 29.0839 44.8727 0
M  V30 4772 C  118.3576 28.4037 42.8337 0
M  V30 4773 O  119.2933 29.3462 42.5209 0
M  V30 4774 H  119.5258 29.9058 43.2653 0
M  V30 4775 N  112.3000 24.3413 43.8597 0
M  V30 4776 H  112.1658 25.3394 43.9568 0
M  V30 4777 C  111.2113 23.4977 44.3554 0 CFG=2
M  V30 4778 H  111.6402 22.7416 45.0143 0
M  V30 4779 C  110.4645 22.7572 43.2379 0
M  V30 4780 O  110.0716 21.6100 43.4511 0
M  V30 4781 C  110.2365 24.3482 45.1807 0
M  V30 4782 H  109.4335 23.7341 45.5889 0
M  V30 4783 H  110.7398 24.8183 46.0231 0
M  V30 4784 H  109.7839 25.1415 44.5846 0
M  V30 4785 N  110.3095 23.4103 42.0710 0
M  V30 4786 H  110.6509 24.3572 41.9794 0
M  V30 4787 C  109.6948 22.8215 40.8838 0 CFG=2
M  V30 4788 H  108.7745 22.3528 41.2147 0
M  V30 4789 C  110.5852 21.7313 40.2682 0
M  V30 4790 O  110.1190 20.6060 40.1200 0
M  V30 4791 C  109.3381 23.8717 39.7938 0 CFG=2
M  V30 4792 H  110.2163 24.4791 39.5735 0
M  V30 4793 O  108.3529 24.7462 40.3055 0
M  V30 4794 H  108.7471 25.2698 41.0113 0
M  V30 4795 C  108.7958 23.3049 38.4655 0
M  V30 4796 H  108.4612 24.1073 37.8070 0
M  V30 4797 H  109.5542 22.7450 37.9175 0
M  V30 4798 H  107.9469 22.6415 38.6352 0
M  V30 4799 N  111.8455 22.0748 39.9577 0
M  V30 4800 H  112.1588 23.0217 40.1349 0
M  V30 4801 C  112.8286 21.1930 39.3264 0 CFG=2
M  V30 4802 H  112.3503 20.7836 38.4340 0
M  V30 4803 C  113.2187 19.9797 40.2048 0
M  V30 4804 O  113.3728 18.8873 39.6588 0
M  V30 4805 C  114.0829 22.0015 38.8568 0 CFG=2
M  V30 4806 H  114.3944 22.6314 39.6916 0
M  V30 4807 C  113.6982 22.9534 37.6918 0
M  V30 4808 H  113.3803 22.3730 36.8294 0
M  V30 4809 H  112.8282 23.5512 37.9628 0
M  V30 4810 C  115.3112 21.1439 38.4761 0
M  V30 4811 H  116.1312 21.7502 38.0940 0
M  V30 4812 H  115.7138 20.6236 39.3425 0
M  V30 4813 H  115.0657 20.4029 37.7156 0
M  V30 4814 C  114.8119 23.9104 37.2418 0
M  V30 4815 H  114.3963 24.7648 36.7078 0
M  V30 4816 H  115.3833 24.2861 38.0905 0
M  V30 4817 H  115.5072 23.4191 36.5617 0
M  V30 4818 N  113.3066 20.1716 41.5361 0
M  V30 4819 H  113.1777 21.1014 41.9136 0
M  V30 4820 C  113.5484 19.1107 42.5219 0 CFG=2
M  V30 4821 H  114.4511 18.5756 42.2240 0
M  V30 4822 C  112.4077 18.0858 42.6167 0
M  V30 4823 O  112.6885 16.8926 42.7174 0
M  V30 4824 C  113.8056 19.7238 43.9077 0
M  V30 4825 H  113.9325 18.9504 44.6662 0
M  V30 4826 H  114.7119 20.3298 43.9087 0
M  V30 4827 H  112.9764 20.3563 44.2281 0
M  V30 4828 N  111.1526 18.5640 42.5770 0
M  V30 4829 H  110.9953 19.5586 42.4914 0
M  V30 4830 C  109.9615 17.7178 42.6592 0 CFG=2
M  V30 4831 H  110.1344 16.9357 43.4024 0
M  V30 4832 C  109.6498 17.0174 41.3259 0
M  V30 4833 O  109.2329 15.8625 41.3492 0
M  V30 4834 C  108.7601 18.5555 43.1270 0
M  V30 4835 H  108.6084 19.4222 42.4834 0
M  V30 4836 H  107.8464 17.9622 43.1008 0
M  V30 4837 O  108.9408 18.9793 44.4598 0
M  V30 4838 H  109.5344 19.7360 44.4550 0
M  V30 4839 N  109.8726 17.7084 40.1937 0
M  V30 4840 H  110.1987 18.6651 40.2519 0
M  V30 4841 C  109.6599 17.1909 38.8390 0 CFG=2
M  V30 4842 H  108.6644 16.7433 38.8208 0
M  V30 4843 C  110.6591 16.0794 38.4606 0
M  V30 4844 O  110.2328 15.0985 37.8511 0
M  V30 4845 C  109.6732 18.3367 37.7812 0
M  V30 4846 H  110.5054 18.9992 38.0230 0
M  V30 4847 C  109.8632 17.9089 36.3114 0
M  V30 4848 H  109.7706 18.7640 35.6416 0
M  V30 4849 H  110.8480 17.4781 36.1283 0
M  V30 4850 H  109.1090 17.1782 36.0166 0
M  V30 4851 C  108.3798 19.1649 37.8834 0
M  V30 4852 H  108.4593 20.0864 37.3092 0
M  V30 4853 H  107.5209 18.6072 37.5081 0
M  V30 4854 H  108.1570 19.4446 38.9101 0
M  V30 4855 N  111.9390 16.2139 38.8630 0
M  V30 4856 H  112.2378 17.0483 39.3501 0
M  V30 4857 C  112.9441 15.1641 38.6664 0 CFG=2
M  V30 4858 H  112.8302 14.8172 37.6369 0
M  V30 4859 C  112.7007 13.9501 39.5808 0
M  V30 4860 O  112.8678 12.8263 39.1152 0
M  V30 4861 C  114.3856 15.7271 38.7707 0
M  V30 4862 H  115.0430 15.0651 38.2053 0
M  V30 4863 H  114.4332 16.6835 38.2495 0
M  V30 4864 C  114.9879 15.8777 40.1844 0
M  V30 4865 H  114.4292 16.6166 40.7545 0
M  V30 4866 H  114.9187 14.9415 40.7363 0
M  V30 4867 S  116.7479 16.3104 40.2248 0
M  V30 4868 C  116.6799 18.0536 39.7505 0
M  V30 4869 H  117.6856 18.4712 39.7080 0
M  V30 4870 H  116.2157 18.1718 38.7720 0
M  V30 4871 H  116.1056 18.6167 40.4847 0
M  V30 4872 N  112.3056 14.1889 40.8458 0
M  V30 4873 H  112.1844 15.1402 41.1652 0
M  V30 4874 C  112.0948 13.1371 41.8415 0 CFG=2
M  V30 4875 H  112.9385 12.4519 41.7531 0
M  V30 4876 C  110.8225 12.3169 41.5772 0
M  V30 4877 O  110.8659 11.0989 41.7353 0
M  V30 4878 C  112.1321 13.7460 43.2590 0
M  V30 4879 H  113.0532 14.3203 43.3694 0
M  V30 4880 H  111.3157 14.4645 43.3550 0
M  V30 4881 C  112.0567 12.7289 44.4215 0
M  V30 4882 H  111.1061 12.2034 44.3448 0
M  V30 4883 C  113.1802 11.6712 44.3721 0
M  V30 4884 H  113.5803 11.4420 45.3599 0
M  V30 4885 H  112.8088 10.7339 43.9579 0
M  V30 4886 H  114.0192 11.9930 43.7550 0
M  V30 4887 C  112.0262 13.4587 45.7729 0
M  V30 4888 H  111.2559 13.0450 46.4232 0
M  V30 4889 H  112.9768 13.3830 46.2999 0
M  V30 4890 H  111.8152 14.5214 45.6562 0
M  V30 4891 N  109.7394 12.9775 41.1328 0
M  V30 4892 H  109.7655 13.9857 41.0525 0
M  V30 4893 C  108.5148 12.3225 40.6706 0 CFG=2
M  V30 4894 H  108.1914 11.6556 41.4728 0
M  V30 4895 C  108.7328 11.4592 39.4188 0
M  V30 4896 O  108.2080 10.3478 39.3712 0
M  V30 4897 C  107.3924 13.3554 40.4635 0
M  V30 4898 H  106.4730 12.8218 40.2435 0
M  V30 4899 H  107.2151 13.9291 41.3684 0
M  V30 4900 O  107.6232 14.2489 39.3949 0
M  V30 4901 H  108.2746 14.8964 39.6790 0
M  V30 4902 N  109.5305 11.9661 38.4605 0
M  V30 4903 H  109.9080 12.8975 38.5695 0
M  V30 4904 C  109.9235 11.2533 37.2471 0 CFG=2
M  V30 4905 H  109.0117 10.9044 36.7604 0
M  V30 4906 C  110.7997 10.0266 37.5338 0
M  V30 4907 O  110.6106 9.0120 36.8701 0
M  V30 4908 C  110.6251 12.2166 36.2836 0
M  V30 4909 H  110.8966 11.7166 35.3527 0
M  V30 4910 H  109.9678 13.0462 36.0270 0
M  V30 4911 H  111.5342 12.6349 36.7164 0
M  V30 4912 N  111.6916 10.1260 38.5373 0
M  V30 4913 H  111.7992 11.0121 39.0128 0
M  V30 4914 C  112.5062 9.0237 39.0509 0 CFG=2
M  V30 4915 H  112.9961 8.5619 38.1911 0
M  V30 4916 C  111.6432 7.9368 39.7164 0
M  V30 4917 O  111.6735 6.8052 39.2486 0
M  V30 4918 C  113.6289 9.5193 40.0179 0 CFG=2
M  V30 4919 H  113.1783 10.2674 40.6700 0
M  V30 4920 C  114.7495 10.2241 39.2182 0
M  V30 4921 H  115.3801 9.4734 38.7402 0
M  V30 4922 H  114.3250 10.8017 38.3974 0
M  V30 4923 C  114.2530 8.4444 40.9417 0
M  V30 4924 H  115.0665 8.8593 41.5366 0
M  V30 4925 H  113.5354 8.0386 41.6550 0
M  V30 4926 H  114.6597 7.6146 40.3633 0
M  V30 4927 C  115.6263 11.1629 40.0627 0
M  V30 4928 H  116.0127 11.9817 39.4553 0
M  V30 4929 H  115.0712 11.6066 40.8892 0
M  V30 4930 H  116.4807 10.6314 40.4819 0
M  V30 4931 N  110.8672 8.2930 40.7547 0
M  V30 4932 H  110.8763 9.2549 41.0710 0
M  V30 4933 C  110.0281 7.3702 41.5336 0 CFG=2
M  V30 4934 H  110.6887 6.6207 41.9732 0
M  V30 4935 C  108.9827 6.6074 40.6974 0
M  V30 4936 O  108.7138 5.4436 40.9945 0
M  V30 4937 C  109.3337 8.1553 42.6652 0
M  V30 4938 H  108.8531 9.0315 42.2265 0
M  V30 4939 H  108.5258 7.5659 43.1029 0
M  V30 4940 C  110.2784 8.6045 43.7986 0
M  V30 4941 H  111.1693 9.0481 43.3553 0
M  V30 4942 C  109.6082 9.7021 44.6341 0
M  V30 4943 H  110.2356 10.0092 45.4705 0
M  V30 4944 H  109.4058 10.5884 44.0333 0
M  V30 4945 H  108.6548 9.3594 45.0313 0
M  V30 4946 C  110.7412 7.4271 44.6797 0
M  V30 4947 H  110.5363 7.5983 45.7367 0
M  V30 4948 H  110.2434 6.4971 44.4072 0
M  V30 4949 H  111.8150 7.2646 44.5815 0
M  V30 4950 N  108.4422 7.2612 39.6567 0
M  V30 4951 H  108.7106 8.2193 39.4784 0
M  V30 4952 C  107.4765 6.6767 38.7295 0 CFG=2
M  V30 4953 H  106.7868 6.0819 39.3287 0
M  V30 4954 C  108.0828 5.7236 37.6761 0
M  V30 4955 O  107.3026 4.9754 37.0927 0
M  V30 4956 C  106.6312 7.7969 38.0939 0
M  V30 4957 H  105.7879 7.3729 37.5477 0
M  V30 4958 H  106.2067 8.4503 38.8545 0
M  V30 4959 O  107.3907 8.5802 37.2033 0
M  V30 4960 H  107.9320 9.1848 37.7200 0
M  V30 4961 N  109.4147 5.7350 37.4551 0
M  V30 4962 H  110.0021 6.3862 37.9585 0
M  V30 4963 C  110.0998 4.8329 36.5104 0 CFG=2
M  V30 4964 H  109.3607 4.2084 36.0098 0
M  V30 4965 C  111.0750 3.8498 37.1996 0
M  V30 4966 O  111.5333 2.9227 36.5312 0
M  V30 4967 C  110.8656 5.5897 35.3782 0 CFG=2
M  V30 4968 H  111.1694 4.8306 34.6547 0
M  V30 4969 C  112.1790 6.2886 35.8185 0
M  V30 4970 H  111.9755 6.9632 36.6440 0
M  V30 4971 H  112.8884 5.5598 36.2096 0
M  V30 4972 C  109.9092 6.5191 34.6019 0
M  V30 4973 H  110.3779 6.9410 33.7132 0
M  V30 4974 H  109.0331 5.9689 34.2627 0
M  V30 4975 H  109.5554 7.3469 35.2141 0
M  V30 4976 C  112.8910 7.0670 34.7029 0
M  V30 4977 H  113.9375 7.2365 34.9568 0
M  V30 4978 H  112.8647 6.5257 33.7567 0
M  V30 4979 H  112.4297 8.0429 34.5476 0
M  V30 4980 N  111.3613 4.0368 38.5008 0
M  V30 4981 H  110.9840 4.8405 38.9844 0
M  V30 4982 C  112.2401 3.1737 39.2908 0 CFG=2
M  V30 4983 H  112.7244 2.4472 38.6375 0
M  V30 4984 C  111.4127 2.3536 40.3055 0
M  V30 4985 O  111.2424 1.1555 40.0843 0
M  V30 4986 C  113.3895 3.9663 39.9889 0 CFG=2
M  V30 4987 H  114.0361 3.2270 40.4614 0
M  V30 4988 O  112.9761 4.8328 41.0312 0
M  V30 4989 H  113.7475 5.3029 41.3586 0
M  V30 4990 C  114.2743 4.7720 39.0222 0
M  V30 4991 H  115.1356 5.1945 39.5402 0
M  V30 4992 H  114.6528 4.1510 38.2145 0
M  V30 4993 H  113.7375 5.5951 38.5562 0
M  V30 4994 N  110.9023 2.9862 41.3760 0
M  V30 4995 H  111.1032 3.9711 41.4880 0
M  V30 4996 C  110.1791 2.3531 42.4837 0 CFG=2
M  V30 4997 H  110.8086 1.5456 42.8617 0
M  V30 4998 C  108.8405 1.7143 42.0636 0
M  V30 4999 O  108.5004 0.6493 42.5809 0
M  V30 5000 C  109.9525 3.3740 43.6434 0
M  V30 5001 H  109.6041 4.3078 43.2018 0
M  V30 5002 C  108.9005 2.9898 44.7057 0
M  V30 5003 H  108.8571 3.7385 45.4965 0
M  V30 5004 H  107.8953 2.9301 44.2885 0
M  V30 5005 H  109.1355 2.0321 45.1692 0
M  V30 5006 C  111.2849 3.6919 44.3428 0
M  V30 5007 H  111.1535 4.4063 45.1557 0
M  V30 5008 H  111.7265 2.7916 44.7699 0
M  V30 5009 H  112.0081 4.1204 43.6489 0
M  V30 5010 N  108.1200 2.3624 41.1332 0
M  V30 5011 H  108.4596 3.2394 40.7616 0
M  V30 5012 C  106.8185 1.9057 40.6539 0 CFG=2
M  V30 5013 H  106.2792 1.5608 41.5391 0
M  V30 5014 C  106.9031 0.6686 39.7240 0
M  V30 5015 O  106.2763 -0.3264 40.0764 0
M  V30 5016 C  106.0111 3.1225 40.1434 0
M  V30 5017 H  105.7508 3.7272 41.0112 0
M  V30 5018 H  106.6546 3.7660 39.5488 0
M  V30 5019 C  104.7188 2.8267 39.3524 0
M  V30 5020 H  104.9987 2.2755 38.4543 0
M  V30 5021 C  103.7276 1.9569 40.1496 0
M  V30 5022 H  102.7196 2.3613 40.1295 0
M  V30 5023 H  103.6679 0.9534 39.7331 0
M  V30 5024 H  104.0095 1.8599 41.1973 0
M  V30 5025 C  104.0696 4.1358 38.8623 0
M  V30 5026 H  103.8229 4.0706 37.8033 0
M  V30 5027 H  103.1496 4.3764 39.3954 0
M  V30 5028 H  104.7306 4.9936 38.9819 0
M  V30 5029 N  107.7111 0.6727 38.6334 0
M  V30 5030 C  107.9904 -0.5439 37.8392 0 CFG=2
M  V30 5031 H  107.0327 -0.8953 37.4567 0
M  V30 5032 C  108.6860 -1.7000 38.5793 0
M  V30 5033 O  108.5108 -2.8447 38.1651 0
M  V30 5034 C  108.8266 -0.0510 36.6521 0
M  V30 5035 H  109.8944 -0.1138 36.8697 0
M  V30 5036 H  108.6342 -0.6170 35.7422 0
M  V30 5037 C  108.4247 1.3984 36.5053 0
M  V30 5038 H  109.1440 1.9802 35.9343 0
M  V30 5039 H  107.4662 1.4582 35.9871 0
M  V30 5040 C  108.2474 1.8434 37.9523 0
M  V30 5041 H  109.1958 2.1129 38.4104 0
M  V30 5042 H  107.5815 2.6943 37.9873 0
M  V30 5043 N  109.4176 -1.4011 39.6689 0
M  V30 5044 H  109.5635 -0.4356 39.9304 0
M  V30 5045 C  109.9347 -2.4073 40.5973 0 CFG=2
M  V30 5046 H  110.4489 -3.1736 40.0133 0
M  V30 5047 C  108.8057 -3.0978 41.3837 0
M  V30 5048 O  108.8297 -4.3203 41.4969 0
M  V30 5049 C  110.9705 -1.7756 41.5380 0
M  V30 5050 H  111.3157 -2.4928 42.2803 0
M  V30 5051 H  111.8457 -1.4385 40.9829 0
M  V30 5052 H  110.5665 -0.9191 42.0758 0
M  V30 5053 N  107.8121 -2.3198 41.8523 0
M  V30 5054 H  107.8670 -1.3188 41.7196 0
M  V30 5055 C  106.6006 -2.8099 42.5179 0 CFG=2
M  V30 5056 H  106.9333 -3.4993 43.2968 0
M  V30 5057 C  105.6838 -3.6113 41.5678 0
M  V30 5058 O  105.1785 -4.6560 41.9742 0
M  V30 5059 C  105.8394 -1.6642 43.2178 0
M  V30 5060 S  104.4958 -2.2824 44.2766 0
M  V30 5061 H  106.5195 -1.0837 43.8408 0
M  V30 5062 H  105.4229 -0.9721 42.4867 0
M  V30 5063 H  103.7424 -2.7650 43.2846 0
M  V30 5064 N  105.5309 -3.1474 40.3124 0
M  V30 5065 H  105.9608 -2.2672 40.0576 0
M  V30 5066 C  104.8233 -3.8553 39.2351 0 CFG=2
M  V30 5067 H  103.8321 -4.1233 39.6041 0
M  V30 5068 C  105.5227 -5.1649 38.8184 0
M  V30 5069 O  104.8521 -6.0477 38.2891 0
M  V30 5070 C  104.6790 -2.9432 37.9933 0
M  V30 5071 H  105.6801 -2.6591 37.6721 0
M  V30 5072 H  104.2655 -3.5147 37.1621 0
M  V30 5073 C  103.8190 -1.6705 38.1707 0
M  V30 5074 H  104.1780 -1.1610 39.0601 0
M  V30 5075 C  104.0234 -0.6957 36.9886 0
M  V30 5076 H  104.5465 0.2024 37.3165 0
M  V30 5077 H  104.6216 -1.1393 36.1917 0
M  V30 5078 H  103.0885 -0.3693 36.5342 0
M  V30 5079 C  102.3291 -1.9775 38.4324 0
M  V30 5080 H  101.6698 -1.5709 37.6661 0
M  V30 5081 H  102.1289 -3.0477 38.4804 0
M  V30 5082 H  102.0134 -1.5424 39.3803 0
M  V30 5083 N  106.8383 -5.2760 39.0704 0
M  V30 5084 H  107.3277 -4.4929 39.4810 0
M  V30 5085 C  107.6220 -6.4780 38.8098 0
M  V30 5086 H  107.3243 -6.9292 37.8621 0
M  V30 5087 H  108.6693 -6.1910 38.7165 0
M  V30 5088 C  107.4923 -7.4932 39.9569 0
M  V30 5089 O  107.5412 -8.6951 39.6991 0
M  V30 5090 N  107.3317 -7.0245 41.2095 0
M  V30 5091 H  107.3157 -6.0261 41.3662 0
M  V30 5092 C  107.1744 -7.8688 42.3991 0 CFG=2
M  V30 5093 H  107.8693 -8.7071 42.3154 0
M  V30 5094 C  105.7503 -8.4507 42.4894 0
M  V30 5095 O  105.6115 -9.6606 42.6676 0
M  V30 5096 C  107.5139 -7.1040 43.7199 0 CFG=2
M  V30 5097 H  106.9421 -6.1745 43.7105 0
M  V30 5098 C  109.0102 -6.7233 43.7708 0
M  V30 5099 H  109.6066 -7.6152 43.9621 0
M  V30 5100 H  109.3386 -6.3623 42.8027 0
M  V30 5101 C  107.1494 -7.8594 45.0210 0
M  V30 5102 H  107.4405 -7.2918 45.9047 0
M  V30 5103 H  106.0807 -8.0440 45.1171 0
M  V30 5104 H  107.6572 -8.8232 45.0694 0
M  V30 5105 C  109.3569 -5.6408 44.8025 0
M  V30 5106 H  110.0617 -4.9218 44.3843 0
M  V30 5107 H  108.4771 -5.0831 45.1236 0
M  V30 5108 H  109.8177 -6.0779 45.6884 0
M  V30 5109 N  104.7315 -7.5822 42.3630 0
M  V30 5110 H  104.9271 -6.5998 42.2170 0
M  V30 5111 C  103.3194 -7.9537 42.4532 0 CFG=2
M  V30 5112 H  103.2097 -8.7182 43.2252 0
M  V30 5113 C  102.7977 -8.5682 41.1453 0
M  V30 5114 O  102.0485 -9.5413 41.2129 0
M  V30 5115 C  102.4570 -6.7326 42.8615 0
M  V30 5116 H  102.7769 -5.8364 42.3287 0
M  V30 5117 H  101.4353 -6.9131 42.5225 0
M  V30 5118 C  102.3881 -6.4649 44.3846 0
M  V30 5119 H  102.1246 -7.4131 44.8557 0
M  V30 5120 C  103.7241 -6.0036 45.0032 0
M  V30 5121 H  103.6041 -5.1421 45.6600 0
M  V30 5122 H  104.1596 -6.7987 45.6073 0
M  V30 5123 H  104.4578 -5.7229 44.2509 0
M  V30 5124 C  101.2425 -5.4935 44.7303 0
M  V30 5125 H  101.6023 -4.4770 44.8912 0
M  V30 5126 H  100.4908 -5.4432 43.9439 0
M  V30 5127 H  100.7272 -5.8091 45.6378 0
M  V30 5128 N  103.1724 -7.9972 39.9868 0
M  V30 5129 H  103.8060 -7.2101 39.9940 0
M  V30 5130 C  102.6171 -8.3872 38.6907 0
M  V30 5131 H  103.1959 -7.9410 37.8844 0
M  V30 5132 H  102.6787 -9.4694 38.5635 0
M  V30 5133 C  101.1647 -7.8997 38.6059 0
M  V30 5134 O  100.8851 -6.7202 38.8241 0
M  V30 5135 N  100.2519 -8.8364 38.3039 0
M  V30 5136 H  100.5694 -9.7788 38.1300 0
M  V30 5137 C  98.7972 -8.6518 38.2593 0 CFG=2
M  V30 5138 H  98.5911 -7.8448 37.5536 0
M  V30 5139 C  98.1464 -8.2617 39.6060 0
M  V30 5140 O  97.0200 -7.7653 39.5922 0
M  V30 5141 C  98.1660 -9.9533 37.7090 0
M  V30 5142 H  97.1069 -9.7751 37.5162 0
M  V30 5143 H  98.6058 -10.1824 36.7372 0
M  V30 5144 C  98.2917 -11.1809 38.6408 0
M  V30 5145 H  99.3404 -11.3568 38.8832 0
M  V30 5146 H  97.7921 -10.9848 39.5902 0
M  V30 5147 C  97.6929 -12.4586 38.0393 0
M  V30 5148 H  96.6511 -12.2793 37.7702 0
M  V30 5149 H  98.2140 -12.7006 37.1121 0
M  V30 5150 C  97.7806 -13.6466 39.0083 0
M  V30 5151 H  98.8196 -13.8423 39.2758 0
M  V30 5152 H  97.2472 -13.4209 39.9325 0
M  V30 5153 N  97.2057 -14.8673 38.4192 0 CHG=1
M  V30 5154 H  97.7109 -15.1077 37.5781 0
M  V30 5155 H  97.2772 -15.6263 39.0819 0
M  V30 5156 H  96.2338 -14.7092 38.1945 0
M  V30 5157 N  98.8328 -8.5237 40.7350 0
M  V30 5158 H  99.7583 -8.9235 40.6666 0
M  V30 5159 C  98.2931 -8.3873 42.0922 0 CFG=2
M  V30 5160 H  97.2978 -8.8259 42.0646 0
M  V30 5161 C  98.0722 -6.9461 42.5875 0
M  V30 5162 O  97.4631 -6.7774 43.6442 0
M  V30 5163 C  99.1135 -9.2345 43.0827 0
M  V30 5164 H  100.1533 -8.9076 43.0928 0
M  V30 5165 H  98.7442 -9.0946 44.0995 0
M  V30 5166 C  99.0590 -10.7143 42.7873 0
M  V30 5167 N  100.0912 -11.3972 42.1703 0
M  V30 5168 H  100.9679 -10.9945 41.8574 0
M  V30 5169 C  98.0862 -11.6595 43.0292 0
M  V30 5170 H  97.1200 -11.5380 43.4965 0
M  V30 5171 C  99.7168 -12.6737 42.0633 0
M  V30 5172 H  100.3344 -13.4395 41.6170 0
M  V30 5173 N  98.5061 -12.9055 42.5564 0
M  V30 5174 N  98.4872 -5.9384 41.7996 0
M  V30 5175 H  98.9864 -6.1470 40.9463 0
M  V30 5176 C  98.1060 -4.5370 41.9970 0 CFG=2
M  V30 5177 H  98.2915 -4.2944 43.0431 0
M  V30 5178 C  96.6032 -4.2847 41.7124 0
M  V30 5179 O  96.0114 -3.4038 42.3348 0
M  V30 5180 C  98.9651 -3.5781 41.1232 0
M  V30 5181 H  98.6690 -2.5589 41.3787 0
M  V30 5182 C  100.4574 -3.6811 41.4814 0
M  V30 5183 H  101.0417 -2.9304 40.9526 0
M  V30 5184 H  100.6213 -3.5237 42.5465 0
M  V30 5185 H  100.8663 -4.6569 41.2187 0
M  V30 5186 C  98.7698 -3.7235 39.5998 0
M  V30 5187 H  99.4583 -3.0787 39.0530 0
M  V30 5188 H  98.9446 -4.7468 39.2669 0
M  V30 5189 H  97.7667 -3.4388 39.2901 0
M  V30 5190 N  96.0067 -5.0931 40.8192 0
M  V30 5191 H  96.5590 -5.7957 40.3459 0
M  V30 5192 C  94.5833 -5.0671 40.4672 0 CFG=2
M  V30 5193 H  94.2004 -4.0650 40.6570 0
M  V30 5194 C  93.7329 -6.0283 41.3188 0
M  V30 5195 O  92.5135 -5.8567 41.3437 0
M  V30 5196 C  94.3424 -5.3628 38.9665 0
M  V30 5197 H  94.6063 -6.4045 38.7748 0
M  V30 5198 H  93.2869 -5.2490 38.7161 0
M  V30 5199 C  95.1533 -4.4920 38.0019 0
M  V30 5200 O  95.3485 -3.2972 38.3196 0
M  V30 5201 O  95.4738 -5.0056 36.9095 0 CHG=-1
M  V30 5202 N  94.3663 -7.0229 41.9721 0
M  V30 5203 H  95.3728 -7.0787 41.9122 0
M  V30 5204 C  93.7034 -8.1211 42.6862 0 CFG=2
M  V30 5205 H  93.0164 -8.5855 41.9765 0
M  V30 5206 C  92.8652 -7.7113 43.9092 0
M  V30 5207 O  91.8574 -8.3703 44.1695 0
M  V30 5208 C  94.7355 -9.1870 43.0787 0
M  V30 5209 H  94.2736 -10.0023 43.6369 0
M  V30 5210 H  95.1919 -9.6281 42.1927 0
M  V30 5211 H  95.5265 -8.7699 43.7026 0
M  V30 5212 N  93.2615 -6.6347 44.6111 0
M  V30 5213 H  94.0979 -6.1397 44.3367 0
M  V30 5214 C  92.4986 -6.0616 45.7220 0 CFG=2
M  V30 5215 H  91.9743 -6.8588 46.2504 0
M  V30 5216 C  91.4327 -5.1112 45.1535 0
M  V30 5217 O  91.6903 -3.9198 44.9982 0
M  V30 5218 C  93.4512 -5.3624 46.7221 0
M  V30 5219 H  93.9584 -4.5317 46.2282 0
M  V30 5220 H  92.8501 -4.9159 47.5164 0
M  V30 5221 C  94.5177 -6.2829 47.3648 0
M  V30 5222 H  95.2024 -6.5909 46.5729 0
M  V30 5223 C  95.3617 -5.5087 48.3985 0
M  V30 5224 H  96.4239 -5.5799 48.1639 0
M  V30 5225 H  95.1044 -4.4496 48.4267 0
M  V30 5226 H  95.2294 -5.8858 49.4127 0
M  V30 5227 C  93.9280 -7.5717 47.9744 0
M  V30 5228 H  94.5018 -7.9244 48.8316 0
M  V30 5229 H  92.9021 -7.4316 48.3120 0
M  V30 5230 H  93.9284 -8.3791 47.2413 0
M  V30 5231 N  90.2723 -5.6865 44.8025 0
M  V30 5232 H  90.1638 -6.6778 44.9620 0
M  V30 5233 C  89.2046 -5.0284 44.0550 0
M  V30 5234 H  89.6208 -4.4347 43.2405 0
M  V30 5235 H  88.5912 -5.8082 43.6096 0
M  V30 5236 C  88.3011 -4.1522 44.9287 0
M  V30 5237 O  88.6214 -3.8184 46.0698 0
M  V30 5238 N  87.1425 -3.7911 44.3538 0
M  V30 5239 H  86.9476 -4.0975 43.4112 0
M  V30 5240 C  86.1051 -2.9513 44.9630 0 CFG=2
M  V30 5241 H  86.5778 -2.0465 45.3421 0
M  V30 5242 C  85.4121 -3.6217 46.1739 0
M  V30 5243 O  84.9123 -2.9169 47.0499 0
M  V30 5244 C  85.0103 -2.5637 43.9221 0
M  V30 5245 H  84.3737 -3.4331 43.7523 0
M  V30 5246 C  84.0961 -1.4280 44.4173 0
M  V30 5247 H  83.4491 -1.0638 43.6208 0
M  V30 5248 H  83.4484 -1.7452 45.2335 0
M  V30 5249 H  84.6773 -0.5748 44.7615 0
M  V30 5250 C  85.5823 -2.1788 42.5418 0
M  V30 5251 H  84.7920 -1.8608 41.8610 0
M  V30 5252 H  86.3005 -1.3658 42.6107 0
M  V30 5253 H  86.0822 -3.0195 42.0647 0
M  V30 5254 N  85.4415 -4.9663 46.2279 0
M  V30 5255 H  85.8800 -5.4664 45.4692 0
M  V30 5256 C  84.9582 -5.7855 47.3428 0 CFG=2
M  V30 5257 H  83.9302 -5.4826 47.5381 0
M  V30 5258 C  85.7345 -5.5647 48.6547 0
M  V30 5259 O  85.1324 -5.7042 49.7171 0
M  V30 5260 C  84.9393 -7.2659 46.8934 0
M  V30 5261 H  84.2448 -7.3546 46.0594 0
M  V30 5262 H  85.9199 -7.5445 46.5042 0
M  V30 5263 C  84.5275 -8.2930 47.9658 0
M  V30 5264 H  85.3080 -8.3002 48.7274 0
M  V30 5265 H  83.6066 -8.0081 48.4761 0
M  V30 5266 C  84.4182 -9.7180 47.4033 0
M  V30 5267 H  83.8913 -9.7681 46.4499 0
M  V30 5268 H  85.4360 -10.0627 47.2190 0
M  V30 5269 N  83.8853 -10.6472 48.4076 0
M  V30 5270 H  83.3252 -10.2171 49.1355 0
M  V30 5271 C  83.9722 -11.9875 48.3814 0
M  V30 5272 N  84.5543 -12.6318 47.3602 0
M  V30 5273 H  84.6183 -13.6397 47.3538 0
M  V30 5274 H  84.9322 -12.1074 46.5847 0
M  V30 5275 N  83.4645 -12.6935 49.3997 0 CHG=1
M  V30 5276 H  83.5260 -13.7021 49.4059 0
M  V30 5277 H  83.0673 -12.2195 50.1988 0
M  V30 5278 N  87.0273 -5.2048 48.5598 0
M  V30 5279 H  87.4405 -5.0789 47.6464 0
M  V30 5280 C  87.9156 -4.9579 49.7008 0 CFG=2
M  V30 5281 H  87.7252 -5.7389 50.4399 0
M  V30 5282 C  87.6725 -3.6070 50.4154 0
M  V30 5283 O  88.1943 -3.4265 51.5165 0
M  V30 5284 C  89.4137 -5.0562 49.2946 0 CFG=2
M  V30 5285 H  89.9943 -5.1317 50.2154 0
M  V30 5286 O  89.9045 -3.9047 48.6336 0
M  V30 5287 H  89.5118 -3.8563 47.7551 0
M  V30 5288 C  89.7483 -6.3037 48.4634 0
M  V30 5289 H  90.8215 -6.3750 48.2968 0
M  V30 5290 H  89.4346 -7.2124 48.9774 0
M  V30 5291 H  89.2643 -6.2870 47.4869 0
M  V30 5292 N  86.8505 -2.7163 49.8254 0
M  V30 5293 H  86.4578 -2.9313 48.9194 0
M  V30 5294 C  86.3763 -1.4732 50.4494 0 CFG=2
M  V30 5295 H  87.2419 -0.9598 50.8703 0
M  V30 5296 C  85.3984 -1.7155 51.6213 0
M  V30 5297 O  85.2137 -0.8139 52.4387 0
M  V30 5298 C  85.7247 -0.5672 49.3796 0
M  V30 5299 H  84.8675 -1.0912 48.9583 0
M  V30 5300 H  85.3175 0.3242 49.8577 0
M  V30 5301 C  86.6637 -0.1156 48.2364 0
M  V30 5302 H  87.0164 -1.0128 47.7258 0
M  V30 5303 C  85.8936 0.7059 47.1833 0
M  V30 5304 H  86.1846 0.4050 46.1785 0
M  V30 5305 H  84.8153 0.5701 47.2627 0
M  V30 5306 H  86.0853 1.7758 47.2701 0
M  V30 5307 C  87.9070 0.6415 48.7447 0
M  V30 5308 H  88.1795 1.4741 48.0956 0
M  V30 5309 H  87.7565 1.0488 49.7447 0
M  V30 5310 H  88.7699 -0.0235 48.7870 0
M  V30 5311 N  84.8263 -2.9285 51.7019 0
M  V30 5312 H  85.0463 -3.6146 50.9925 0
M  V30 5313 C  84.0602 -3.4383 52.8365 0 CFG=2
M  V30 5314 H  84.4702 -3.0008 53.7485 0
M  V30 5315 C  84.3232 -4.9570 52.9356 0
M  V30 5316 O  85.4138 -5.4002 52.5751 0
M  V30 5317 C  82.5786 -3.0044 52.6973 0
M  V30 5318 H  82.5439 -1.9412 52.4622 0
M  V30 5319 H  82.1263 -3.5066 51.8430 0
M  V30 5320 C  81.7008 -3.1936 53.9247 0
M  V30 5321 C  81.9452 -2.4345 55.0885 0
M  V30 5322 H  82.7296 -1.6923 55.0995 0
M  V30 5323 C  80.6897 -4.1787 53.9495 0
M  V30 5324 H  80.4989 -4.7911 53.0826 0
M  V30 5325 C  81.1815 -2.6457 56.2288 0
M  V30 5326 H  81.3686 -2.0624 57.1185 0
M  V30 5327 C  79.9386 -4.3757 55.1000 0
M  V30 5328 H  79.1655 -5.1301 55.1155 0
M  V30 5329 C  80.1821 -3.6108 56.2336 0
M  V30 5330 H  79.5949 -3.7716 57.1260 0
M  V30 5331 N  83.3595 -5.7347 53.4476 0
M  V30 5332 H  82.4952 -5.3127 53.7583 0
M  V30 5333 C  83.4415 -7.1911 53.5775 0 CFG=2
M  V30 5334 H  84.2313 -7.5837 52.9352 0
M  V30 5335 C  82.1441 -7.8379 53.0538 0
M  V30 5336 O  81.5720 -8.6951 53.7269 0
M  V30 5337 C  83.7658 -7.5815 55.0424 0
M  V30 5338 H  82.9305 -7.2816 55.6775 0
M  V30 5339 H  83.8250 -8.6682 55.1213 0
M  V30 5340 C  85.0577 -6.9847 55.6413 0
M  V30 5341 H  85.0723 -5.8946 55.6612 0
M  V30 5342 H  85.0298 -7.2887 56.6887 0
M  V30 5343 C  86.3554 -7.5723 55.0600 0
M  V30 5344 H  86.4258 -8.5871 55.4530 0
M  V30 5345 H  86.3639 -7.6821 53.9757 0
M  V30 5346 N  87.5590 -6.9400 55.6232 0
M  V30 5347 H  87.8654 -7.3183 56.5082 0
M  V30 5348 C  88.2429 -5.8983 55.1174 0
M  V30 5349 N  87.8760 -5.3003 53.9771 0
M  V30 5350 H  88.4051 -4.5281 53.5950 0
M  V30 5351 H  87.0393 -5.5999 53.4886 0
M  V30 5352 N  89.3229 -5.4479 55.7680 0 CHG=1
M  V30 5353 H  89.8508 -4.6685 55.4022 0
M  V30 5354 H  89.6236 -5.8851 56.6272 0
M  V30 5355 N  81.6984 -7.4102 51.8581 0
M  V30 5356 H  82.2266 -6.7128 51.3542 0
M  V30 5357 C  80.4844 -7.9002 51.1960 0 CFG=2
M  V30 5358 H  79.6678 -7.8521 51.9141 0
M  V30 5359 C  80.7134 -9.3269 50.6310 0
M  V30 5360 O  81.6691 -9.5017 49.8731 0
M  V30 5361 C  80.1066 -6.9852 49.9929 0
M  V30 5362 H  80.9356 -6.9723 49.2832 0
M  V30 5363 C  78.8559 -7.4656 49.2262 0
M  V30 5364 H  78.5676 -6.7475 48.4583 0
M  V30 5365 H  79.0200 -8.4162 48.7201 0
M  V30 5366 H  78.0046 -7.5878 49.8963 0
M  V30 5367 C  79.8836 -5.5308 50.4304 0
M  V30 5368 H  79.5311 -4.9218 49.5988 0
M  V30 5369 H  79.1391 -5.4631 51.2239 0
M  V30 5370 H  80.8085 -5.0817 50.7876 0
M  V30 5371 N  79.8506 -10.3130 50.9815 0
M  V30 5372 C  79.8417 -11.6436 50.3362 0 CFG=2
M  V30 5373 H  80.7964 -12.1211 50.5629 0
M  V30 5374 C  79.6155 -11.5982 48.8101 0
M  V30 5375 O  78.5280 -11.2292 48.3666 0
M  V30 5376 C  78.7187 -12.4089 51.0662 0
M  V30 5377 H  77.7716 -12.3452 50.5280 0
M  V30 5378 H  78.9479 -13.4678 51.1894 0
M  V30 5379 C  78.5677 -11.6995 52.3986 0
M  V30 5380 H  77.5951 -11.8535 52.8667 0
M  V30 5381 H  79.3340 -12.0579 53.0877 0
M  V30 5382 C  78.8472 -10.2466 52.0448 0
M  V30 5383 H  77.9516 -9.7589 51.6571 0
M  V30 5384 H  79.1818 -9.7094 52.9322 0
M  V30 5385 N  80.6626 -11.9776 48.0556 0
M  V30 5386 H  81.5086 -12.2422 48.5380 0
M  V30 5387 C  80.7479 -12.1200 46.5932 0 CFG=2
M  V30 5388 H  81.7447 -12.5271 46.4184 0
M  V30 5389 C  80.7068 -10.8079 45.7873 0
M  V30 5390 O  81.5629 -10.6166 44.9231 0
M  V30 5391 C  79.7411 -13.1594 46.0484 0
M  V30 5392 H  78.7192 -12.8797 46.3070 0
M  V30 5393 H  79.7739 -13.1670 44.9576 0
M  V30 5394 C  79.9921 -14.5754 46.5368 0
M  V30 5395 C  80.9901 -15.3664 45.9290 0
M  V30 5396 H  81.5213 -15.0004 45.0625 0
M  V30 5397 C  79.3580 -15.0505 47.7052 0
M  V30 5398 H  78.6252 -14.4410 48.2137 0
M  V30 5399 C  81.2907 -16.6207 46.4436 0
M  V30 5400 H  82.0449 -17.2307 45.9685 0
M  V30 5401 C  79.6733 -16.3072 48.2042 0
M  V30 5402 H  79.1767 -16.6741 49.0904 0
M  V30 5403 C  80.6313 -17.0906 47.5727 0
M  V30 5404 H  80.8721 -18.0666 47.9679 0
M  V30 5405 N  79.7380 -9.9292 46.0906 0
M  V30 5406 H  79.0838 -10.1717 46.8236 0
M  V30 5407 C  79.5673 -8.5983 45.5023 0 CFG=2
M  V30 5408 H  79.8432 -8.6460 44.4481 0
M  V30 5409 C  80.5300 -7.5751 46.1446 0
M  V30 5410 O  81.5239 -7.9686 46.7574 0
M  V30 5411 C  78.0739 -8.1916 45.6088 0
M  V30 5412 H  77.7857 -8.1874 46.6600 0
M  V30 5413 H  77.9270 -7.1706 45.2541 0
M  V30 5414 C  77.0993 -9.1022 44.8267 0
M  V30 5415 H  77.2420 -10.1243 45.1801 0
M  V30 5416 C  75.6326 -8.7417 45.1470 0
M  V30 5417 H  75.0984 -8.3411 44.2855 0
M  V30 5418 H  75.0846 -9.6207 45.4880 0
M  V30 5419 H  75.5569 -7.9930 45.9363 0
M  V30 5420 C  77.3828 -9.0998 43.3089 0
M  V30 5421 H  76.4733 -9.0530 42.7101 0
M  V30 5422 H  78.0044 -8.2555 43.0095 0
M  V30 5423 H  77.9069 -10.0101 43.0164 0
M  V30 5424 N  80.2492 -6.2745 45.9661 0
M  V30 5425 H  79.4164 -5.9923 45.4688 0
M  V30 5426 C  81.1422 -5.2000 46.3847 0 CFG=2
M  V30 5427 H  81.6992 -5.5169 47.2677 0
M  V30 5428 C  80.3841 -3.9295 46.7829 0
M  V30 5429 O  79.3717 -3.5939 46.1678 0
M  V30 5430 C  82.1272 -4.9233 45.2412 0
M  V30 5431 H  82.6689 -3.9923 45.3965 0
M  V30 5432 H  82.8579 -5.7240 45.1454 0
M  V30 5433 H  81.6086 -4.8541 44.2871 0
M  V30 5434 N  80.9381 -3.2327 47.7892 0
M  V30 5435 H  81.7843 -3.5800 48.2165 0
M  V30 5436 C  80.4977 -1.9204 48.2549 0 CFG=2
M  V30 5437 H  79.4534 -1.7269 47.9986 0
M  V30 5438 C  81.3576 -0.8714 47.5348 0
M  V30 5439 O  82.5019 -0.6512 47.9325 0
M  V30 5440 C  80.6617 -1.8503 49.7964 0
M  V30 5441 H  80.2319 -2.7525 50.2289 0
M  V30 5442 H  81.7138 -1.8516 50.0837 0
M  V30 5443 C  79.9485 -0.6749 50.4797 0
M  V30 5444 O  79.6565 0.3475 49.8637 0
M  V30 5445 N  79.6816 -0.8109 51.7808 0
M  V30 5446 H  79.2046 -0.0704 52.2748 0
M  V30 5447 H  79.9214 -1.6594 52.2728 0
M  V30 5448 N  80.7987 -0.2679 46.4734 0
M  V30 5449 H  79.8560 -0.5058 46.2016 0
M  V30 5450 C  81.4814 0.7241 45.6450 0 CFG=2
M  V30 5451 H  82.5427 0.4743 45.6296 0
M  V30 5452 C  81.3770 2.1277 46.2652 0
M  V30 5453 O  80.5825 2.9573 45.8249 0
M  V30 5454 C  81.0056 0.6022 44.1798 0
M  V30 5455 H  81.7075 1.1432 43.5485 0
M  V30 5456 H  81.1050 -0.4363 43.8780 0
M  V30 5457 C  79.6288 1.0507 43.7763 0
M  V30 5458 C  78.4583 0.6151 44.2964 0
M  V30 5459 H  78.3694 -0.1081 45.0931 0
M  V30 5460 C  79.2692 1.9885 42.7140 0
M  V30 5461 N  77.4075 1.2313 43.6489 0
M  V30 5462 H  76.4417 1.0539 43.8859 0
M  V30 5463 C  80.0003 2.7654 41.7833 0
M  V30 5464 H  81.0779 2.7139 41.7752 0
M  V30 5465 C  77.8458 2.0916 42.6637 0
M  V30 5466 C  79.3481 3.6160 40.8686 0
M  V30 5467 H  79.9304 4.2120 40.1824 0
M  V30 5468 C  77.1839 2.9292 41.7477 0
M  V30 5469 H  76.1053 2.9832 41.7362 0
M  V30 5470 C  77.9430 3.6991 40.8475 0
M  V30 5471 H  77.4512 4.3526 40.1417 0
M  V30 5472 N  82.2226 2.3608 47.2838 0
M  V30 5473 H  82.8170 1.6062 47.5981 0
M  V30 5474 C  82.3688 3.6266 48.0115 0 CFG=2
M  V30 5475 H  81.3715 3.9263 48.3393 0
M  V30 5476 C  82.9138 4.7881 47.1523 0
M  V30 5477 O  82.7569 5.9429 47.5457 0
M  V30 5478 C  83.2341 3.3856 49.2651 0
M  V30 5479 H  84.2129 2.9978 48.9778 0
M  V30 5480 H  83.4173 4.3391 49.7632 0
M  V30 5481 C  82.5683 2.4317 50.2741 0
M  V30 5482 H  81.5651 2.7923 50.5055 0
M  V30 5483 H  82.4395 1.4476 49.8224 0
M  V30 5484 C  83.3664 2.2794 51.5753 0
M  V30 5485 H  84.3579 1.8856 51.3504 0
M  V30 5486 H  83.5216 3.2618 52.0230 0
M  V30 5487 C  82.6594 1.3619 52.5815 0
M  V30 5488 H  81.6878 1.7756 52.8540 0
M  V30 5489 H  82.4799 0.3835 52.1365 0
M  V30 5490 N  83.4628 1.1842 53.8018 0 CHG=1
M  V30 5491 H  84.3343 0.7303 53.5577 0
M  V30 5492 H  83.6535 2.0835 54.2198 0
M  V30 5493 H  82.9591 0.6065 54.4589 0
M  V30 5494 N  83.4812 4.4588 45.9778 0
M  V30 5495 H  83.5843 3.4765 45.7716 0
M  V30 5496 C  83.7460 5.3481 44.8449 0 CFG=2
M  V30 5497 H  84.4842 6.0738 45.1916 0
M  V30 5498 C  82.5021 6.1488 44.3970 0
M  V30 5499 O  82.5788 7.3762 44.3499 0
M  V30 5500 C  84.3790 4.5716 43.6363 0 CFG=2
M  V30 5501 H  85.4376 4.4785 43.8797 0
M  V30 5502 C  84.3099 5.3105 42.2749 0
M  V30 5503 H  83.3256 5.1696 41.8289 0
M  V30 5504 H  84.4204 6.3826 42.4227 0
M  V30 5505 C  83.8308 3.1353 43.4726 0
M  V30 5506 H  84.2858 2.6167 42.6302 0
M  V30 5507 H  84.0266 2.5166 44.3484 0
M  V30 5508 H  82.7560 3.1487 43.3043 0
M  V30 5509 C  85.3720 4.8860 41.2575 0
M  V30 5510 H  86.3661 5.1844 41.5887 0
M  V30 5511 H  85.3783 3.8115 41.0823 0
M  V30 5512 H  85.1812 5.3670 40.2999 0
M  V30 5513 N  81.3932 5.4404 44.1030 0
M  V30 5514 H  81.4254 4.4357 44.2033 0
M  V30 5515 C  80.0767 5.9797 43.7276 0 CFG=2
M  V30 5516 H  79.4899 5.1363 43.3633 0
M  V30 5517 C  80.1050 6.9718 42.5379 0
M  V30 5518 O  79.3638 7.9549 42.5371 0
M  V30 5519 C  79.3653 6.5326 44.9875 0
M  V30 5520 H  80.0261 7.1549 45.5920 0
M  V30 5521 H  78.5031 7.1473 44.7284 0
M  V30 5522 O  78.8631 5.4631 45.7634 0
M  V30 5523 H  79.5957 4.8941 46.0172 0
M  V30 5524 N  80.9896 6.7065 41.5588 0
M  V30 5525 H  81.5590 5.8766 41.6291 0
M  V30 5526 C  81.2621 7.5734 40.4119 0 CFG=2
M  V30 5527 H  81.4901 8.5680 40.8011 0
M  V30 5528 C  80.0748 7.6923 39.4448 0
M  V30 5529 O  79.4725 6.6798 39.0844 0
M  V30 5530 C  82.5096 7.0605 39.6758 0
M  V30 5531 H  82.6701 7.5929 38.7373 0
M  V30 5532 H  83.4037 7.2049 40.2814 0
M  V30 5533 H  82.4294 5.9978 39.4464 0
M  V30 5534 N  79.7983 8.9385 39.0269 0
M  V30 5535 H  80.3509 9.7076 39.3768 0
M  V30 5536 C  78.7730 9.2943 38.0500 0 CFG=2
M  V30 5537 H  77.8845 8.6838 38.2241 0
M  V30 5538 C  79.2782 9.0275 36.6232 0
M  V30 5539 O  79.8541 9.9152 35.9932 0
M  V30 5540 C  78.3792 10.7664 38.2623 0
M  V30 5541 H  77.6272 11.0814 37.5375 0
M  V30 5542 H  77.9559 10.9171 39.2560 0
M  V30 5543 H  79.2359 11.4349 38.1644 0
M  V30 5544 N  79.0714 7.7862 36.1595 0
M  V30 5545 H  78.6156 7.1092 36.7549 0
M  V30 5546 C  79.4502 7.3165 34.8280 0 CFG=2
M  V30 5547 H  80.4780 7.6206 34.6215 0
M  V30 5548 C  78.5302 7.8879 33.7334 0
M  V30 5549 O  77.3595 8.1599 34.0034 0
M  V30 5550 C  79.3489 5.7764 34.7993 0
M  V30 5551 H  78.2962 5.4901 34.8493 0
M  V30 5552 H  79.7050 5.4107 33.8359 0
M  V30 5553 C  80.0918 5.0031 35.8798 0
M  V30 5554 C  81.4602 5.2362 36.1330 0
M  V30 5555 H  81.9876 6.0098 35.5974 0
M  V30 5556 C  79.4164 3.9961 36.6010 0
M  V30 5557 H  78.3672 3.8178 36.4256 0
M  V30 5558 C  82.1496 4.4497 37.0773 0
M  V30 5559 H  83.1988 4.6253 37.2617 0
M  V30 5560 C  80.1039 3.2088 37.5432 0
M  V30 5561 H  79.5756 2.4343 38.0814 0
M  V30 5562 C  81.4732 3.4342 37.7810 0
M  V30 5563 O  82.1448 2.6702 38.6909 0
M  V30 5564 H  81.5913 2.0000 39.1071 0
M  V30 5565 N  79.0489 7.9562 32.4929 0
M  V30 5566 H  80.0247 7.7468 32.3431 0
M  V30 5567 C  78.2339 8.1372 31.2809 0 CFG=2
M  V30 5568 H  77.4977 8.9135 31.4995 0
M  V30 5569 C  77.4201 6.8733 30.9165 0
M  V30 5570 O  76.4729 6.9760 30.1377 0
M  V30 5571 C  79.1093 8.6849 30.1229 0
M  V30 5572 H  78.4684 9.0062 29.3004 0
M  V30 5573 H  79.5705 9.6021 30.4925 0
M  V30 5574 C  80.2246 7.7606 29.5698 0
M  V30 5575 H  80.7107 7.2843 30.4200 0
M  V30 5576 C  79.6798 6.6422 28.6517 0
M  V30 5577 H  80.3009 6.4718 27.7744 0
M  V30 5578 H  79.6232 5.6945 29.1854 0
M  V30 5579 H  78.6779 6.8657 28.2853 0
M  V30 5580 C  81.3208 8.5874 28.8583 0
M  V30 5581 H  82.2182 8.6487 29.4738 0
M  V30 5582 H  81.6271 8.1662 27.9011 0
M  V30 5583 H  80.9999 9.6103 28.6592 0
M  V30 5584 N  77.7861 5.7202 31.5082 0
M  V30 5585 H  78.5810 5.7363 32.1284 0
M  V30 5586 C  77.0426 4.4646 31.4746 0 CFG=2
M  V30 5587 H  76.8005 4.2435 30.4324 0
M  V30 5588 C  75.7452 4.5943 32.2929 0
M  V30 5589 O  75.8014 4.8250 33.5013 0
M  V30 5590 C  77.9567 3.3454 32.0235 0
M  V30 5591 H  78.8809 3.3314 31.4490 0
M  V30 5592 H  78.2377 3.5636 33.0548 0
M  V30 5593 C  77.3684 1.9310 31.9539 0
M  V30 5594 O  76.4900 1.6417 31.1441 0
M  V30 5595 N  77.8692 1.0431 32.8126 0
M  V30 5596 H  77.5400 0.0811 32.8225 0
M  V30 5597 H  78.5887 1.3104 33.4660 0
M  V30 5598 N  74.6142 4.4159 31.5978 0
M  V30 5599 H  74.6794 4.2205 30.6092 0
M  V30 5600 C  73.2538 4.4554 32.1340 0 CFG=2
M  V30 5601 H  73.1613 5.3439 32.7616 0
M  V30 5602 C  72.9024 3.2406 33.0164 0
M  V30 5603 O  72.0200 3.3658 33.8646 0
M  V30 5604 C  72.2683 4.5970 30.9529 0
M  V30 5605 H  71.2451 4.6486 31.3287 0
M  V30 5606 H  72.4451 5.5532 30.4589 0
M  V30 5607 C  72.3359 3.5291 29.8952 0
M  V30 5608 C  71.5230 2.4510 29.8187 0
M  V30 5609 H  70.7024 2.2568 30.4941 0
M  V30 5610 C  73.3090 3.3726 28.8137 0
M  V30 5611 N  71.9186 1.6446 28.7720 0
M  V30 5612 H  71.4482 0.7807 28.5424 0
M  V30 5613 C  74.4166 4.1255 28.3521 0
M  V30 5614 H  74.6705 5.0547 28.8410 0
M  V30 5615 C  73.0208 2.1574 28.1202 0
M  V30 5616 C  75.1996 3.6859 27.2655 0
M  V30 5617 H  76.0424 4.2767 26.9378 0
M  V30 5618 C  73.7915 1.7110 27.0322 0
M  V30 5619 H  73.5477 0.7849 26.5330 0
M  V30 5620 C  74.8882 2.4816 26.6050 0
M  V30 5621 H  75.4914 2.1497 25.7729 0
M  V30 5622 N  73.5919 2.1034 32.8110 0
M  V30 5623 H  74.2946 2.0743 32.0855 0
M  V30 5624 C  73.4194 0.8749 33.5898 0 CFG=2
M  V30 5625 H  72.3516 0.7041 33.7376 0
M  V30 5626 C  74.0709 0.9772 34.9785 0
M  V30 5627 O  73.4772 0.5141 35.9515 0
M  V30 5628 C  74.0208 -0.3233 32.8191 0
M  V30 5629 H  75.0873 -0.1468 32.6763 0
M  V30 5630 H  73.9541 -1.2235 33.4329 0
M  V30 5631 C  73.3737 -0.6102 31.4460 0
M  V30 5632 H  73.4409 0.3018 30.8521 0
M  V30 5633 C  74.1768 -1.6782 30.6734 0
M  V30 5634 H  73.6137 -2.5982 30.5171 0
M  V30 5635 H  74.4689 -1.3047 29.6914 0
M  V30 5636 H  75.0936 -1.9580 31.1942 0
M  V30 5637 C  71.8777 -0.9723 31.5657 0
M  V30 5638 H  71.5899 -1.7966 30.9133 0
M  V30 5639 H  71.6075 -1.2598 32.5822 0
M  V30 5640 H  71.2532 -0.1215 31.2937 0
M  V30 5641 N  75.2805 1.5685 35.0283 0
M  V30 5642 H  75.6653 1.9268 34.1664 0
M  V30 5643 C  76.1388 1.7301 36.2082 0 CFG=2
M  V30 5644 H  77.0816 2.1134 35.8215 0
M  V30 5645 C  76.4925 0.4046 36.9188 0
M  V30 5646 O  76.6157 0.3742 38.1436 0
M  V30 5647 C  75.5492 2.7916 37.1580 0
M  V30 5648 H  76.2357 3.0211 37.9740 0
M  V30 5649 H  75.3577 3.7245 36.6266 0
M  V30 5650 H  74.6079 2.4616 37.5989 0
M  V30 5651 N  76.6567 -0.6642 36.1196 0
M  V30 5652 H  76.5659 -0.5452 35.1185 0
M  V30 5653 C  76.9249 -2.0472 36.5323 0 CFG=2
M  V30 5654 H  76.2115 -2.2537 37.3324 0
M  V30 5655 C  78.3133 -2.2752 37.1698 0
M  V30 5656 O  78.5223 -3.3373 37.7578 0
M  V30 5657 C  76.6392 -3.1047 35.4206 0
M  V30 5658 H  77.0615 -4.0661 35.7172 0
M  V30 5659 H  75.5601 -3.2517 35.3643 0
M  V30 5660 C  77.1207 -2.8115 33.9876 0
M  V30 5661 O  77.3402 -1.6314 33.6380 0
M  V30 5662 O  77.2090 -3.7953 33.2213 0 CHG=-1
M  V30 5663 N  79.2228 -1.2864 37.0801 0
M  V30 5664 H  78.9699 -0.4401 36.5918 0
M  V30 5665 C  80.5526 -1.3098 37.6929 0 CFG=2
M  V30 5666 H  80.9258 -2.3324 37.6315 0
M  V30 5667 C  80.4996 -0.9410 39.1926 0
M  V30 5668 O  81.0913 0.0545 39.6132 0
M  V30 5669 C  81.5101 -0.4346 36.8527 0
M  V30 5670 H  81.4065 -0.7358 35.8101 0
M  V30 5671 H  81.1807 0.6027 36.9069 0
M  V30 5672 C  83.0092 -0.5222 37.2214 0
M  V30 5673 H  83.2196 -0.3639 38.2786 0
M  V30 5674 H  83.3055 -1.5488 37.0055 0
M  V30 5675 C  83.8787 0.4092 36.3610 0
M  V30 5676 H  83.9466 -0.0619 35.3801 0
M  V30 5677 H  83.4444 1.3948 36.1913 0
M  V30 5678 N  85.2852 0.4450 36.7869 0
M  V30 5679 H  85.8936 -0.2174 36.3268 0
M  V30 5680 C  85.8185 1.2432 37.7289 0
M  V30 5681 N  85.0724 2.1100 38.4276 0
M  V30 5682 H  85.4972 2.6944 39.1326 0
M  V30 5683 H  84.0714 2.1661 38.2805 0
M  V30 5684 N  87.1327 1.1760 37.9728 0 CHG=1
M  V30 5685 H  87.5570 1.7753 38.6716 0
M  V30 5686 H  87.7223 0.5478 37.4458 0
M  V30 5687 N  79.8120 -1.7912 39.9738 0
M  V30 5688 H  79.2920 -2.5381 39.5320 0
M  V30 5689 C  79.9488 -1.8920 41.4304 0 CFG=2
M  V30 5690 H  80.1578 -0.8943 41.8138 0
M  V30 5691 C  81.1470 -2.7855 41.8178 0
M  V30 5692 O  81.6038 -2.7239 42.9547 0
M  V30 5693 C  78.6023 -2.3454 42.0480 0
M  V30 5694 H  78.6264 -2.2016 43.1293 0
M  V30 5695 H  77.8549 -1.6352 41.6907 0
M  V30 5696 C  78.1283 -3.7916 41.7317 0
M  V30 5697 H  78.4158 -4.0171 40.7038 0
M  V30 5698 C  78.7940 -4.8581 42.6351 0
M  V30 5699 H  78.0799 -5.5333 43.1054 0
M  V30 5700 H  79.4767 -5.4796 42.0560 0
M  V30 5701 H  79.3700 -4.4081 43.4428 0
M  V30 5702 C  76.5855 -3.8939 41.7677 0
M  V30 5703 H  76.1952 -4.1330 40.7779 0
M  V30 5704 H  76.2202 -4.6644 42.4461 0
M  V30 5705 H  76.1128 -2.9622 42.0793 0
M  V30 5706 N  81.6379 -3.5720 40.8495 0
M  V30 5707 H  81.1845 -3.5402 39.9475 0
M  V30 5708 C  82.8666 -4.3574 40.8646 0 CFG=2
M  V30 5709 H  83.5194 -3.9964 41.6575 0
M  V30 5710 C  83.5679 -4.1256 39.5100 0
M  V30 5711 O  82.9420 -3.6061 38.5853 0
M  V30 5712 C  82.4789 -5.8371 41.1175 0
M  V30 5713 H  81.9189 -5.8915 42.0521 0
M  V30 5714 H  81.7758 -6.1518 40.3443 0
M  V30 5715 C  83.6103 -6.8884 41.1836 0
M  V30 5716 H  83.1645 -7.8722 41.3376 0
M  V30 5717 H  84.1267 -6.9566 40.2261 0
M  V30 5718 C  84.6446 -6.6305 42.2839 0
M  V30 5719 O  85.4967 -5.7529 42.1601 0
M  V30 5720 N  84.5987 -7.4257 43.3534 0
M  V30 5721 H  85.2552 -7.3048 44.1093 0
M  V30 5722 H  83.8888 -8.1416 43.4249 0
M  V30 5723 N  84.8508 -4.5122 39.4098 0
M  V30 5724 H  85.2875 -4.9216 40.2238 0
M  V30 5725 C  85.6858 -4.4773 38.1978 0 CFG=2
M  V30 5726 H  85.8624 -3.4304 37.9442 0
M  V30 5727 C  84.9961 -5.1771 37.0058 0
M  V30 5728 O  84.9164 -6.4056 36.9905 0
M  V30 5729 C  87.0432 -5.1474 38.5117 0
M  V30 5730 H  86.8469 -6.1788 38.8092 0
M  V30 5731 H  87.6494 -5.2117 37.6069 0
M  V30 5732 C  87.8763 -4.4521 39.6104 0
M  V30 5733 H  88.3056 -3.5044 39.2845 0
M  V30 5734 H  87.1945 -4.1902 40.4173 0
M  V30 5735 C  88.9216 -5.3780 40.2518 0
M  V30 5736 H  89.4254 -5.9287 39.4567 0
M  V30 5737 H  89.6939 -4.8249 40.7872 0
M  V30 5738 N  88.2644 -6.4160 41.0608 0
M  V30 5739 H  87.2644 -6.3096 41.1725 0
M  V30 5740 C  88.8571 -7.4512 41.6761 0
M  V30 5741 N  90.1839 -7.6206 41.6400 0
M  V30 5742 H  90.6180 -8.3862 42.1363 0
M  V30 5743 H  90.7754 -6.9401 41.1785 0
M  V30 5744 N  88.1025 -8.3294 42.3481 0 CHG=1
M  V30 5745 H  88.5297 -9.1177 42.8134 0
M  V30 5746 H  87.0981 -8.2268 42.3698 0
M  V30 5747 N  84.4635 -4.3699 36.0725 0
M  V30 5748 H  84.5763 -3.3705 36.1557 0
M  V30 5749 C  83.6021 -4.8152 34.9750 0 CFG=2
M  V30 5750 H  83.7211 -5.8888 34.8124 0
M  V30 5751 C  84.0002 -4.0803 33.6818 0
M  V30 5752 O  84.1132 -2.8526 33.6895 0
M  V30 5753 C  82.1068 -4.5108 35.2828 0 CFG=2
M  V30 5754 H  81.9920 -3.4490 35.5071 0
M  V30 5755 O  81.7065 -5.2175 36.4394 0
M  V30 5756 H  82.1993 -4.8711 37.1895 0
M  V30 5757 C  81.1154 -4.8794 34.1676 0
M  V30 5758 H  80.0861 -4.6957 34.4792 0
M  V30 5759 H  81.2867 -4.2854 33.2738 0
M  V30 5760 H  81.1975 -5.9315 33.8926 0
M  V30 5761 N  84.2046 -4.8559 32.6018 0
M  V30 5762 H  84.0795 -5.8550 32.6808 0
M  V30 5763 C  84.7087 -4.3800 31.3095 0 CFG=2
M  V30 5764 H  85.4963 -3.6534 31.5213 0
M  V30 5765 C  83.6673 -3.6439 30.4396 0
M  V30 5766 O  84.0793 -2.9059 29.5477 0
M  V30 5767 C  85.3776 -5.5642 30.5702 0
M  V30 5768 H  86.1451 -5.9786 31.2256 0
M  V30 5769 H  84.6545 -6.3647 30.4065 0
M  V30 5770 C  86.0408 -5.1909 29.2295 0
M  V30 5771 H  85.2727 -4.9834 28.4836 0
M  V30 5772 H  86.5984 -4.2649 29.3572 0
M  V30 5773 C  86.9679 -6.2807 28.6720 0
M  V30 5774 H  87.7166 -6.5491 29.4184 0
M  V30 5775 H  86.3864 -7.1849 28.4888 0
M  V30 5776 C  87.6638 -5.8600 27.3671 0
M  V30 5777 H  88.2067 -6.7068 26.9464 0
M  V30 5778 H  86.9267 -5.5559 26.6239 0
M  V30 5779 N  88.6219 -4.7595 27.5797 0 CHG=1
M  V30 5780 H  88.1561 -3.9566 27.9880 0
M  V30 5781 H  89.3506 -5.0573 28.2115 0
M  V30 5782 H  89.0313 -4.4879 26.6979 0
M  V30 5783 N  82.3585 -3.8104 30.7105 0
M  V30 5784 H  82.0828 -4.4183 31.4677 0
M  V30 5785 C  81.2562 -3.1552 29.9830 0 CFG=2
M  V30 5786 H  81.3142 -3.4837 28.9436 0
M  V30 5787 C  81.3261 -1.6081 29.9877 0
M  V30 5788 O  80.8879 -0.9852 29.0201 0
M  V30 5789 C  79.8672 -3.5664 30.5497 0 CFG=2
M  V30 5790 H  79.1065 -3.1854 29.8661 0
M  V30 5791 O  79.5934 -2.9633 31.8014 0
M  V30 5792 H  78.7459 -3.2857 32.1351 0
M  V30 5793 C  79.6503 -5.0844 30.6499 0
M  V30 5794 H  78.6408 -5.3121 30.9942 0
M  V30 5795 H  79.7809 -5.5610 29.6781 0
M  V30 5796 H  80.3462 -5.5527 31.3455 0
M  V30 5797 N  81.9205 -1.0344 31.0496 0
M  V30 5798 H  82.2430 -1.6301 31.7988 0
M  V30 5799 C  82.2053 0.3903 31.1981 0 CFG=2
M  V30 5800 H  81.2661 0.9107 31.0049 0
M  V30 5801 C  83.2352 0.9132 30.1843 0
M  V30 5802 O  83.0834 2.0493 29.7441 0
M  V30 5803 C  82.6525 0.6670 32.6530 0
M  V30 5804 H  83.0057 -0.2627 33.1025 0
M  V30 5805 H  83.5103 1.3412 32.6975 0
M  V30 5806 C  81.5185 1.2493 33.5132 0
M  V30 5807 H  80.5555 0.7598 33.3705 0
M  V30 5808 H  81.8084 1.0015 34.5282 0
M  V30 5809 C  81.4512 2.7827 33.5439 0
M  V30 5810 H  80.4822 3.0723 33.9455 0
M  V30 5811 H  82.2091 3.1910 34.2121 0
M  V30 5812 N  81.4639 3.3690 32.2000 0
M  V30 5813 H  81.0618 2.7977 31.4700 0
M  V30 5814 C  81.9498 4.5708 31.8550 0
M  V30 5815 N  82.4601 5.4230 32.7538 0
M  V30 5816 H  82.8622 6.2985 32.4425 0
M  V30 5817 H  82.4401 5.2011 33.7377 0
M  V30 5818 N  81.9509 4.9152 30.5675 0 CHG=1
M  V30 5819 H  82.4452 5.7567 30.2748 0
M  V30 5820 H  81.6021 4.2842 29.8611 0
M  V30 5821 N  84.2300 0.0871 29.8178 0
M  V30 5822 H  84.2629 -0.8505 30.1945 0
M  V30 5823 C  85.2728 0.4113 28.8400 0 CFG=2
M  V30 5824 H  85.6955 1.3803 29.1117 0
M  V30 5825 C  84.7299 0.5116 27.4038 0
M  V30 5826 O  85.2174 1.3454 26.6414 0
M  V30 5827 C  86.4018 -0.6399 28.8974 0
M  V30 5828 H  86.0432 -1.5908 28.5001 0
M  V30 5829 H  87.1999 -0.3258 28.2221 0
M  V30 5830 C  87.0008 -0.8588 30.3041 0
M  V30 5831 H  87.4114 0.0785 30.6806 0
M  V30 5832 H  86.2240 -1.1655 31.0050 0
M  V30 5833 C  88.1023 -1.9227 30.3522 0
M  V30 5834 O  88.5118 -2.4092 29.2736 0
M  V30 5835 O  88.5138 -2.2455 31.4871 0 CHG=-1
M  V30 5836 N  83.7316 -0.3279 27.0740 0
M  V30 5837 H  83.4005 -0.9902 27.7612 0
M  V30 5838 C  83.1053 -0.4135 25.7531 0 CFG=2
M  V30 5839 H  83.9052 -0.5166 25.0173 0
M  V30 5840 C  82.3124 0.8533 25.3921 0
M  V30 5841 O  82.4625 1.3572 24.2795 0
M  V30 5842 C  82.1987 -1.6658 25.6755 0
M  V30 5843 H  81.3198 -1.5195 26.3051 0
M  V30 5844 H  81.8114 -1.7623 24.6598 0
M  V30 5845 C  82.8610 -3.0008 26.0842 0
M  V30 5846 H  83.1026 -2.9875 27.1456 0
M  V30 5847 H  82.1472 -3.8138 25.9511 0
M  V30 5848 C  84.1214 -3.3431 25.2860 0
M  V30 5849 O  85.1387 -3.6653 25.9386 0
M  V30 5850 O  84.0463 -3.2775 24.0397 0 CHG=-1
M  V30 5851 N  81.5094 1.3555 26.3463 0
M  V30 5852 H  81.4319 0.8789 27.2338 0
M  V30 5853 C  80.7190 2.5788 26.1900 0 CFG=2
M  V30 5854 H  80.3380 2.6074 25.1668 0
M  V30 5855 C  81.5463 3.8685 26.3908 0
M  V30 5856 O  81.1587 4.8987 25.8410 0
M  V30 5857 C  79.4916 2.6004 27.1441 0
M  V30 5858 H  78.9545 3.5342 26.9662 0
M  V30 5859 C  78.4976 1.4752 26.8097 0
M  V30 5860 H  77.6112 1.5336 27.4421 0
M  V30 5861 H  78.1650 1.5365 25.7732 0
M  V30 5862 H  78.9416 0.4906 26.9606 0
M  V30 5863 C  79.8376 2.5760 28.6425 0
M  V30 5864 H  78.9292 2.5770 29.2438 0
M  V30 5865 H  80.4026 1.6830 28.9040 0
M  V30 5866 H  80.4217 3.4433 28.9366 0
M  V30 5867 N  82.6781 3.7879 27.1198 0
M  V30 5868 H  82.9311 2.9023 27.5358 0
M  V30 5869 C  83.6536 4.8716 27.2826 0 CFG=2
M  V30 5870 H  83.1091 5.7681 27.5858 0
M  V30 5871 C  84.3614 5.1648 25.9493 0
M  V30 5872 O  84.1856 6.2505 25.4007 0
M  V30 5873 C  84.6584 4.5000 28.4015 0
M  V30 5874 H  84.1169 4.2254 29.3003 0
M  V30 5875 H  85.1953 3.5949 28.1193 0
M  V30 5876 C  85.7009 5.5692 28.7920 0
M  V30 5877 H  86.4183 5.1016 29.4636 0
M  V30 5878 H  86.2716 5.8918 27.9211 0
M  V30 5879 C  85.1411 6.7997 29.5183 0
M  V30 5880 O  84.0162 6.7137 30.0579 0
M  V30 5881 O  85.8811 7.8056 29.5647 0 CHG=-1
M  V30 5882 N  85.1099 4.1701 25.4396 0
M  V30 5883 H  85.1815 3.2979 25.9477 0
M  V30 5884 C  85.8411 4.2202 24.1711 0 CFG=2
M  V30 5885 H  86.5110 5.0814 24.2098 0
M  V30 5886 C  84.9414 4.3885 22.9330 0
M  V30 5887 O  85.3955 4.9665 21.9463 0
M  V30 5888 C  86.6976 2.9515 24.0476 0
M  V30 5889 H  87.2732 2.9448 23.1220 0
M  V30 5890 H  87.4076 2.8776 24.8721 0
M  V30 5891 H  86.0811 2.0514 24.0582 0
M  V30 5892 N  83.6830 3.9191 23.0196 0
M  V30 5893 H  83.4032 3.4266 23.8568 0
M  V30 5894 C  82.6588 4.0944 21.9916 0
M  V30 5895 H  83.0404 3.7722 21.0213 0
M  V30 5896 H  81.8066 3.4581 22.2312 0
M  V30 5897 C  82.1873 5.5551 21.9201 0
M  V30 5898 O  81.9715 6.0590 20.8199 0
M  V30 5899 N  82.0723 6.2413 23.0729 0
M  V30 5900 H  82.2599 5.7714 23.9483 0
M  V30 5901 C  81.7865 7.6752 23.1699 0 CFG=2
M  V30 5902 H  80.9106 7.8646 22.5459 0
M  V30 5903 C  82.9045 8.5604 22.5880 0
M  V30 5904 O  82.6111 9.4306 21.7700 0
M  V30 5905 C  81.3695 8.0456 24.6176 0
M  V30 5906 H  80.3450 7.7087 24.7807 0
M  V30 5907 H  81.9697 7.4929 25.3387 0
M  V30 5908 C  81.4381 9.5183 24.9949 0
M  V30 5909 C  80.4254 10.4078 24.5779 0
M  V30 5910 H  79.5547 10.0346 24.0590 0
M  V30 5911 C  82.5948 10.0385 25.6164 0
M  V30 5912 H  83.4032 9.3802 25.9009 0
M  V30 5913 C  80.5494 11.7677 24.8320 0
M  V30 5914 H  79.7678 12.4459 24.5237 0
M  V30 5915 C  82.6998 11.4012 25.8587 0
M  V30 5916 H  83.5821 11.7949 26.3409 0
M  V30 5917 C  81.6794 12.2609 25.4730 0
M  V30 5918 H  81.7710 13.3202 25.6630 0
M  V30 5919 N  84.1555 8.3047 23.0073 0
M  V30 5920 H  84.3073 7.5731 23.6893 0
M  V30 5921 C  85.3459 9.0419 22.5742 0 CFG=2
M  V30 5922 H  85.1359 10.1081 22.6776 0
M  V30 5923 C  85.7366 8.8205 21.1013 0
M  V30 5924 O  86.2830 9.7415 20.4958 0
M  V30 5925 C  86.5273 8.7049 23.4974 0
M  V30 5926 H  86.6393 7.6221 23.5337 0
M  V30 5927 H  87.4530 9.1062 23.0870 0
M  V30 5928 C  86.4337 9.1959 24.9077 0
M  V30 5929 C  86.3147 8.4153 26.0036 0
M  V30 5930 H  86.3142 7.3377 25.9881 0
M  V30 5931 C  86.4642 10.5697 25.3993 0
M  V30 5932 N  86.2226 9.2031 27.1279 0
M  V30 5933 H  86.1165 8.8083 28.0614 0
M  V30 5934 C  86.6068 11.8409 24.7944 0
M  V30 5935 H  86.7252 11.9087 23.7227 0
M  V30 5936 C  86.3168 10.5419 26.8197 0
M  V30 5937 C  86.6101 13.0181 25.5691 0
M  V30 5938 H  86.7364 13.9739 25.0862 0
M  V30 5939 C  86.2996 11.7089 27.5987 0
M  V30 5940 H  86.1775 11.6413 28.6687 0
M  V30 5941 C  86.4517 12.9558 26.9674 0
M  V30 5942 H  86.4500 13.8614 27.5552 0
M  V30 5943 N  85.4388 7.6338 20.5441 0
M  V30 5944 H  85.0190 6.9105 21.1130 0
M  V30 5945 C  85.6909 7.3091 19.1391 0
M  V30 5946 H  86.7060 7.5946 18.8561 0
M  V30 5947 H  85.6137 6.2298 19.0072 0
M  V30 5948 C  84.6657 8.0007 18.2263 0
M  V30 5949 O  85.0401 8.5045 17.1681 0
M  V30 5950 N  83.3908 8.0614 18.6545 0
M  V30 5951 H  83.1442 7.6263 19.5333 0
M  V30 5952 C  82.3048 8.7641 17.9627 0 CFG=2
M  V30 5953 H  82.3767 8.5236 16.9018 0
M  V30 5954 C  82.3869 10.2965 18.0760 0
M  V30 5955 O  81.8393 10.9777 17.2106 0
M  V30 5956 C  80.9455 8.2474 18.4723 0
M  V30 5957 H  80.9157 8.3003 19.5620 0
M  V30 5958 H  80.1465 8.9010 18.1181 0
M  V30 5959 C  80.6251 6.8221 17.9910 0
M  V30 5960 H  80.5554 6.8172 16.9025 0
M  V30 5961 H  81.4457 6.1495 18.2414 0
M  V30 5962 C  79.3184 6.2807 18.5881 0
M  V30 5963 H  79.3688 6.3335 19.6767 0
M  V30 5964 H  78.4909 6.9252 18.2881 0
M  V30 5965 C  79.0309 4.8367 18.1558 0
M  V30 5966 H  78.9577 4.7732 17.0695 0
M  V30 5967 H  79.8463 4.1812 18.4640 0
M  V30 5968 N  77.7769 4.3396 18.7464 0 CHG=1
M  V30 5969 H  77.8441 4.3662 19.7539 0
M  V30 5970 H  77.0068 4.9200 18.4457 0
M  V30 5971 H  77.6164 3.3884 18.4467 0
M  V30 5972 N  83.0805 10.8089 19.1077 0
M  V30 5973 H  83.4731 10.1801 19.7949 0
M  V30 5974 C  83.3484 12.2328 19.3186 0 CFG=2
M  V30 5975 H  82.3945 12.7525 19.2205 0
M  V30 5976 C  84.2928 12.8127 18.2460 0
M  V30 5977 O  84.0740 13.9444 17.8139 0
M  V30 5978 C  83.8278 12.4313 20.7781 0
M  V30 5979 H  83.0386 12.0158 21.4052 0
M  V30 5980 H  84.7081 11.8222 20.9804 0
M  V30 5981 C  84.0885 13.8864 21.2406 0
M  V30 5982 H  83.3258 14.5111 20.7741 0
M  V30 5983 C  83.8938 14.0377 22.7683 0
M  V30 5984 H  83.1584 14.8121 22.9878 0
M  V30 5985 H  83.5414 13.1199 23.2392 0
M  V30 5986 H  84.8090 14.3115 23.2909 0
M  V30 5987 C  85.4641 14.4194 20.7852 0
M  V30 5988 H  86.0524 14.8390 21.5988 0
M  V30 5989 H  86.0796 13.6446 20.3276 0
M  V30 5990 H  85.3350 15.2098 20.0461 0
M  V30 5991 N  85.2796 12.0125 17.7988 0
M  V30 5992 H  85.3974 11.0958 18.2071 0
M  V30 5993 C  86.1811 12.3431 16.6890 0 CFG=2
M  V30 5994 H  86.5564 13.3565 16.8479 0
M  V30 5995 C  85.4607 12.3149 15.3240 0
M  V30 5996 O  85.8210 13.1028 14.4533 0
M  V30 5997 C  87.3983 11.3710 16.6230 0
M  V30 5998 H  87.0148 10.3535 16.5285 0
M  V30 5999 C  88.3602 11.6004 15.4355 0
M  V30 6000 H  89.1909 10.8959 15.4706 0
M  V30 6001 H  87.8827 11.4607 14.4686 0
M  V30 6002 H  88.7774 12.6077 15.4543 0
M  V30 6003 C  88.2210 11.4248 17.9177 0
M  V30 6004 H  89.0699 10.7443 17.8623 0
M  V30 6005 H  88.6112 12.4267 18.1004 0
M  V30 6006 H  87.6304 11.1353 18.7844 0
M  V30 6007 N  84.4455 11.4449 15.1652 0
M  V30 6008 H  84.2025 10.8265 15.9262 0
M  V30 6009 C  83.6618 11.2942 13.9284 0 CFG=2
M  V30 6010 H  84.3777 11.2007 13.1098 0
M  V30 6011 C  82.7729 12.5129 13.6125 0
M  V30 6012 O  82.4331 12.7066 12.4457 0
M  V30 6013 C  82.8143 10.0006 13.9745 0
M  V30 6014 H  82.0979 10.0453 14.7943 0
M  V30 6015 H  82.2255 9.9206 13.0594 0
M  V30 6016 C  83.6294 8.7073 14.0913 0
M  V30 6017 O  84.8521 8.7075 13.9652 0
M  V30 6018 N  82.9454 7.5845 14.3180 0
M  V30 6019 H  83.4311 6.7034 14.4044 0
M  V30 6020 H  81.9400 7.6056 14.4066 0
M  V30 6021 N  82.4609 13.3379 14.6292 0
M  V30 6022 H  82.7711 13.1017 15.5613 0
M  V30 6023 C  81.8507 14.6628 14.4724 0 CFG=2
M  V30 6024 H  80.9358 14.5527 13.8872 0
M  V30 6025 C  82.7894 15.6282 13.7246 0
M  V30 6026 O  82.3362 16.3767 12.8596 0
M  V30 6027 C  81.4894 15.2691 15.8503 0
M  V30 6028 H  82.4019 15.5909 16.3559 0
M  V30 6029 H  80.8999 16.1729 15.6951 0
M  V30 6030 C  80.7234 14.3414 16.8077 0
M  V30 6031 H  79.7784 13.9888 16.3935 0
M  V30 6032 H  81.3435 13.4590 16.9472 0
M  V30 6033 C  80.5478 14.9596 18.2011 0
M  V30 6034 H  81.5307 14.9346 18.6719 0
M  V30 6035 H  80.2459 16.0073 18.1800 0
M  V30 6036 N  79.7106 14.1170 19.0666 0
M  V30 6037 H  79.0810 13.4880 18.5890 0
M  V30 6038 C  79.6728 14.1594 20.4102 0
M  V30 6039 N  80.4357 15.0147 21.1062 0
M  V30 6040 H  80.3988 15.0360 22.1150 0
M  V30 6041 H  81.0500 15.6507 20.6194 0
M  V30 6042 N  78.8550 13.3289 21.0687 0 CHG=1
M  V30 6043 H  78.8106 13.3480 22.0774 0
M  V30 6044 H  78.2714 12.6774 20.5641 0
M  V30 6045 N  84.0834 15.5630 14.0798 0
M  V30 6046 H  84.3631 14.8931 14.7826 0
M  V30 6047 C  85.1607 16.3923 13.5504 0 CFG=2
M  V30 6048 H  84.7852 17.4111 13.4410 0
M  V30 6049 C  85.6327 15.9153 12.1587 0
M  V30 6050 O  86.0772 16.7504 11.3778 0
M  V30 6051 C  86.3823 16.4176 14.5172 0
M  V30 6052 H  86.8754 15.4455 14.4973 0
M  V30 6053 C  87.4374 17.4623 14.1216 0
M  V30 6054 H  88.2318 17.5185 14.8655 0
M  V30 6055 H  87.9109 17.2412 13.1670 0
M  V30 6056 H  86.9872 18.4531 14.0498 0
M  V30 6057 C  85.9683 16.6842 15.9755 0
M  V30 6058 H  86.8389 16.7038 16.6311 0
M  V30 6059 H  85.4586 17.6440 16.0623 0
M  V30 6060 H  85.3051 15.9126 16.3649 0
M  V30 6061 N  85.4782 14.6162 11.8326 0
M  V30 6062 H  85.1336 13.9666 12.5259 0
M  V30 6063 C  85.6994 14.0845 10.4790 0 CFG=2
M  V30 6064 H  86.7055 14.3687 10.1637 0
M  V30 6065 C  84.7095 14.6591 9.4483 0
M  V30 6066 O  85.1053 14.9097 8.3107 0
M  V30 6067 C  85.6011 12.5444 10.4627 0
M  V30 6068 H  84.6336 12.2327 10.8576 0
M  V30 6069 H  85.6217 12.1935 9.4293 0
M  V30 6070 C  86.7130 11.8138 11.2233 0
M  V30 6071 H  87.6846 12.1443 10.8590 0
M  V30 6072 H  86.6705 12.0500 12.2840 0
M  V30 6073 S  86.6304 10.0159 11.0226 0
M  V30 6074 C  87.8951 9.4872 12.2037 0
M  V30 6075 H  88.8164 10.0541 12.0678 0
M  V30 6076 H  87.5402 9.6238 13.2237 0
M  V30 6077 H  88.1138 8.4290 12.0621 0
M  V30 6078 N  83.4503 14.8559 9.8735 0
M  V30 6079 H  83.2100 14.6173 10.8254 0
M  V30 6080 C  82.3641 15.3820 9.0490 0 CFG=2
M  V30 6081 H  82.4665 14.9807 8.0386 0
M  V30 6082 C  82.3739 16.9164 8.9419 0
M  V30 6083 O  81.9538 17.4379 7.9098 0
M  V30 6084 C  81.0197 14.8938 9.6278 0
M  V30 6085 H  80.9514 15.1730 10.6808 0
M  V30 6086 H  80.2025 15.4100 9.1235 0
M  V30 6087 C  80.8027 13.3767 9.4741 0
M  V30 6088 H  80.7443 13.1251 8.4145 0
M  V30 6089 H  81.6708 12.8392 9.8559 0
M  V30 6090 C  79.5509 12.8496 10.1956 0
M  V30 6091 H  79.5513 11.7602 10.1408 0
M  V30 6092 H  79.6225 13.0940 11.2566 0
M  V30 6093 C  78.2282 13.3911 9.6303 0
M  V30 6094 H  78.1654 14.4721 9.7561 0
M  V30 6095 H  78.1612 13.1843 8.5617 0
M  V30 6096 N  77.0696 12.7766 10.3007 0 CHG=1
M  V30 6097 H  77.1003 12.9834 11.2889 0
M  V30 6098 H  76.2153 13.1454 9.9076 0
M  V30 6099 H  77.0934 11.7756 10.1666 0
M  V30 6100 N  82.8154 17.6084 10.0060 0
M  V30 6101 H  83.1556 17.1062 10.8147 0
M  V30 6102 C  82.7123 19.0629 10.1547 0 CFG=2
M  V30 6103 H  82.5256 19.5316 9.1877 0
M  V30 6104 C  84.0343 19.6940 10.6684 0
M  V30 6105 O  83.9857 20.4140 11.6651 0
M  V30 6106 C  81.5040 19.3792 11.0810 0
M  V30 6107 H  81.7291 19.0142 12.0834 0
M  V30 6108 H  81.3868 20.4571 11.1792 0
M  V30 6109 C  80.1379 18.7883 10.6733 0
M  V30 6110 H  80.1222 17.6998 10.6189 0
M  V30 6111 H  79.4842 19.0385 11.5103 0
M  V30 6112 C  79.5127 19.4450 9.4322 0
M  V30 6113 H  79.1582 20.4206 9.7623 0
M  V30 6114 H  80.2079 19.6526 8.6189 0
M  V30 6115 N  78.2530 18.8018 9.0293 0
M  V30 6116 H  77.4419 19.0793 9.5635 0
M  V30 6117 C  78.0859 17.8808 8.0644 0
M  V30 6118 N  79.1135 17.4289 7.3338 0
M  V30 6119 H  78.9668 16.7592 6.5930 0
M  V30 6120 H  80.0561 17.7519 7.5212 0
M  V30 6121 N  76.8573 17.4072 7.8211 0 CHG=1
M  V30 6122 H  76.7052 16.7336 7.0843 0
M  V30 6123 H  76.0646 17.7480 8.3462 0
M  V30 6124 N  85.1996 19.4052 10.0329 0
M  V30 6125 C  86.5297 19.7436 10.5890 0 CFG=2
M  V30 6126 H  86.6563 19.2413 11.5491 0
M  V30 6127 C  86.7795 21.2400 10.8376 0
M  V30 6128 O  87.0765 21.6129 11.9732 0
M  V30 6129 C  87.5239 19.1443 9.5751 0
M  V30 6130 H  88.4492 19.7126 9.4697 0
M  V30 6131 H  87.8050 18.1397 9.8934 0
M  V30 6132 C  86.7498 19.0674 8.2690 0
M  V30 6133 H  86.7609 20.0400 7.7757 0
M  V30 6134 H  87.1524 18.3331 7.5708 0
M  V30 6135 C  85.3366 18.7437 8.7332 0
M  V30 6136 H  84.5930 19.0681 8.0043 0
M  V30 6137 H  85.2416 17.6671 8.8701 0
M  V30 6138 N  86.6428 22.0628 9.7860 0
M  V30 6139 H  86.4040 21.6821 8.8820 0
M  V30 6140 C  86.8419 23.5128 9.8439 0 CFG=2
M  V30 6141 H  87.8041 23.6943 10.3275 0
M  V30 6142 C  85.7693 24.2453 10.6761 0
M  V30 6143 O  86.0846 25.2708 11.2750 0
M  V30 6144 C  86.8873 24.1408 8.4229 0
M  V30 6145 H  87.0514 25.2130 8.5467 0
M  V30 6146 C  88.0972 23.6259 7.6241 0
M  V30 6147 H  88.1767 24.1314 6.6613 0
M  V30 6148 H  89.0285 23.8032 8.1629 0
M  V30 6149 H  88.0249 22.5556 7.4288 0
M  V30 6150 C  85.5865 23.9907 7.6049 0
M  V30 6151 H  85.7062 24.4097 6.6055 0
M  V30 6152 H  85.3047 22.9440 7.4881 0
M  V30 6153 H  84.7488 24.5141 8.0654 0
M  V30 6154 N  84.5482 23.6854 10.7331 0
M  V30 6155 H  84.3787 22.8295 10.2255 0
M  V30 6156 C  83.4261 24.1960 11.5196 0 CFG=2
M  V30 6157 H  83.3869 25.2753 11.3627 0
M  V30 6158 C  83.6066 23.9703 13.0342 0
M  V30 6159 O  83.1259 24.7963 13.8077 0
M  V30 6160 C  82.1249 23.5798 10.9565 0
M  V30 6161 H  82.0457 23.8405 9.8998 0
M  V30 6162 H  82.2282 22.4966 10.9837 0
M  V30 6163 C  80.8019 23.9659 11.6613 0
M  V30 6164 H  80.8650 23.6497 12.7031 0
M  V30 6165 C  80.5586 25.4917 11.6610 0
M  V30 6166 H  79.5349 25.7604 11.4015 0
M  V30 6167 H  80.7526 25.9108 12.6488 0
M  V30 6168 H  81.2085 26.0098 10.9558 0
M  V30 6169 C  79.6176 23.1829 11.0544 0
M  V30 6170 H  79.1735 22.5169 11.7949 0
M  V30 6171 H  78.8215 23.8287 10.6845 0
M  V30 6172 H  79.9322 22.5654 10.2134 0
M  V30 6173 N  84.3196 22.8996 13.4301 0
M  V30 6174 H  84.6623 22.2442 12.7410 0
M  V30 6175 C  84.7445 22.6719 14.8119 0 CFG=2
M  V30 6176 H  83.9435 23.0165 15.4692 0
M  V30 6177 C  85.9772 23.4994 15.2081 0
M  V30 6178 O  85.9564 24.1034 16.2767 0
M  V30 6179 C  84.9548 21.1659 15.0990 0
M  V30 6180 H  85.3597 20.6597 14.2210 0
M  V30 6181 H  85.7099 21.0375 15.8746 0
M  V30 6182 C  83.7139 20.4363 15.5875 0
M  V30 6183 C  83.1802 20.7292 16.8612 0
M  V30 6184 H  83.6715 21.4430 17.5061 0
M  V30 6185 C  83.0272 19.5297 14.7544 0
M  V30 6186 H  83.4055 19.2948 13.7739 0
M  V30 6187 C  82.0201 20.1009 17.2932 0
M  V30 6188 H  81.6240 20.3201 18.2739 0
M  V30 6189 C  81.8618 18.9213 15.1993 0
M  V30 6190 H  81.3381 18.2314 14.5553 0
M  V30 6191 C  81.3647 19.1984 16.4660 0
M  V30 6192 H  80.4594 18.7172 16.8057 0
M  V30 6193 N  87.0188 23.5121 14.3589 0
M  V30 6194 H  86.9591 22.9943 13.4920 0
M  V30 6195 C  88.3168 24.1245 14.6576 0 CFG=2
M  V30 6196 H  88.6265 23.7676 15.6417 0
M  V30 6197 C  88.3147 25.6621 14.7132 0
M  V30 6198 O  88.9262 26.2201 15.6249 0
M  V30 6199 C  89.3532 23.6248 13.6427 0
M  V30 6200 H  90.3347 24.0645 13.8239 0
M  V30 6201 H  89.4640 22.5450 13.7131 0
M  V30 6202 H  89.0627 23.8641 12.6188 0
M  V30 6203 N  87.6457 26.3102 13.7421 0
M  V30 6204 H  87.1593 25.7759 13.0340 0
M  V30 6205 C  87.5997 27.7672 13.5828 0 CFG=2
M  V30 6206 H  88.6373 28.0819 13.4529 0
M  V30 6207 C  87.0510 28.5707 14.7837 0
M  V30 6208 O  87.7594 29.4838 15.2079 0
M  V30 6209 C  86.8685 28.1357 12.2821 0
M  V30 6210 H  86.8176 29.2172 12.1498 0
M  V30 6211 H  87.3902 27.7297 11.4150 0
M  V30 6212 H  85.8486 27.7536 12.2606 0
M  V30 6213 N  85.8590 28.2386 15.3459 0
M  V30 6214 C  85.3098 28.9904 16.4929 0 CFG=2
M  V30 6215 H  85.2296 30.0427 16.2223 0
M  V30 6216 C  86.1321 28.9065 17.7920 0
M  V30 6217 O  86.0711 29.8487 18.5775 0
M  V30 6218 C  83.8868 28.4382 16.6741 0
M  V30 6219 H  83.5455 28.4198 17.7104 0
M  V30 6220 H  83.1855 29.0590 16.1146 0
M  V30 6221 C  83.9370 27.0523 16.0614 0
M  V30 6222 H  84.3705 26.3522 16.7767 0
M  V30 6223 H  82.9572 26.6731 15.7709 0
M  V30 6224 C  84.8893 27.2401 14.8878 0
M  V30 6225 H  85.3154 26.2843 14.6005 0
M  V30 6226 H  84.3488 27.6412 14.0299 0
M  V30 6227 N  86.8975 27.8171 17.9820 0
M  V30 6228 H  86.9030 27.0853 17.2855 0
M  V30 6229 C  87.7470 27.5929 19.1567 0 CFG=2
M  V30 6230 H  87.1543 27.8078 20.0471 0
M  V30 6231 C  88.9789 28.5215 19.1540 0
M  V30 6232 O  89.3283 29.0631 20.2026 0
M  V30 6233 C  88.2370 26.1188 19.2546 0 CFG=2
M  V30 6234 H  88.8504 25.9112 18.3767 0
M  V30 6235 C  87.0440 25.1366 19.2182 0
M  V30 6236 H  86.4753 25.2156 20.1419 0
M  V30 6237 H  86.3373 25.4147 18.4395 0
M  V30 6238 C  89.1098 25.8552 20.5065 0
M  V30 6239 H  89.4066 24.8104 20.5815 0
M  V30 6240 H  90.0330 26.4331 20.5067 0
M  V30 6241 H  88.5717 26.1122 21.4189 0
M  V30 6242 C  87.4412 23.6789 18.9572 0
M  V30 6243 H  86.5611 23.0923 18.6987 0
M  V30 6244 H  88.1384 23.6016 18.1234 0
M  V30 6245 H  87.9005 23.2151 19.8277 0
M  V30 6246 N  89.5818 28.7190 17.9693 0
M  V30 6247 H  89.2385 28.2355 17.1507 0
M  V30 6248 C  90.6703 29.6710 17.7470 0 CFG=2
M  V30 6249 H  91.4258 29.5062 18.5185 0
M  V30 6250 C  90.1839 31.1312 17.8687 0
M  V30 6251 O  90.8835 31.9381 18.4800 0
M  V30 6252 C  91.3331 29.4479 16.3548 0
M  V30 6253 H  90.5415 29.4346 15.6036 0
M  V30 6254 C  92.3337 30.5426 15.9223 0
M  V30 6255 H  92.8427 30.2661 14.9986 0
M  V30 6256 H  91.8432 31.4975 15.7315 0
M  V30 6257 H  93.0970 30.7041 16.6838 0
M  V30 6258 C  92.0211 28.0711 16.2914 0
M  V30 6259 H  92.4665 27.8956 15.3119 0
M  V30 6260 H  92.8138 27.9899 17.0358 0
M  V30 6261 H  91.3163 27.2594 16.4699 0
M  V30 6262 N  88.9847 31.4183 17.3267 0
M  V30 6263 H  88.4811 30.6858 16.8442 0
M  V30 6264 C  88.3292 32.7301 17.3411 0 CFG=2
M  V30 6265 H  89.0374 33.4310 16.8987 0
M  V30 6266 C  88.0045 33.2536 18.7568 0
M  V30 6267 O  88.1976 34.4457 18.9964 0
M  V30 6268 C  87.0573 32.7425 16.4360 0 CFG=2
M  V30 6269 H  86.5210 31.8187 16.6434 0
M  V30 6270 C  87.4672 32.7144 14.9438 0
M  V30 6271 H  87.8378 33.6984 14.6540 0
M  V30 6272 H  88.3078 32.0370 14.7937 0
M  V30 6273 C  86.0544 33.8963 16.6780 0
M  V30 6274 H  85.2247 33.8554 15.9727 0
M  V30 6275 H  85.6076 33.8545 17.6717 0
M  V30 6276 H  86.5348 34.8685 16.5633 0
M  V30 6277 C  86.3399 32.2969 13.9860 0
M  V30 6278 H  86.7440 31.7812 13.1145 0
M  V30 6279 H  85.6283 31.6226 14.4617 0
M  V30 6280 H  85.7873 33.1656 13.6278 0
M  V30 6281 N  87.5573 32.3736 19.6729 0
M  V30 6282 H  87.3945 31.4078 19.4211 0
M  V30 6283 C  87.2958 32.7553 21.0649 0 CFG=2
M  V30 6284 H  86.7936 33.7241 21.0434 0
M  V30 6285 C  88.5760 32.9466 21.9021 0
M  V30 6286 O  88.5386 33.7518 22.8264 0
M  V30 6287 C  86.3430 31.7849 21.8203 0 CFG=2
M  V30 6288 H  86.2455 32.1701 22.8371 0
M  V30 6289 C  86.8702 30.3373 21.9585 0
M  V30 6290 H  86.9165 29.8845 20.9732 0
M  V30 6291 H  87.8903 30.3269 22.3392 0
M  V30 6292 C  84.9240 31.8394 21.2228 0
M  V30 6293 H  84.2163 31.2563 21.8116 0
M  V30 6294 H  84.5501 32.8633 21.1975 0
M  V30 6295 H  84.8985 31.4589 20.2032 0
M  V30 6296 C  86.0236 29.4420 22.8731 0
M  V30 6297 H  86.6096 28.5969 23.2352 0
M  V30 6298 H  85.6580 29.9877 23.7434 0
M  V30 6299 H  85.1622 29.0389 22.3402 0
M  V30 6300 N  89.6833 32.2581 21.5669 0
M  V30 6301 H  89.6629 31.6130 20.7890 0
M  V30 6302 C  90.9623 32.4050 22.2718 0 CFG=2
M  V30 6303 H  90.7421 32.4644 23.3393 0
M  V30 6304 C  91.7020 33.7125 21.9309 0
M  V30 6305 O  92.3165 34.2912 22.8278 0
M  V30 6306 C  91.8452 31.1590 22.0601 0
M  V30 6307 H  91.8776 30.8904 21.0030 0
M  V30 6308 H  92.8742 31.3833 22.3447 0
M  V30 6309 C  91.3686 29.9598 22.8955 0
M  V30 6310 H  91.3113 30.2604 23.9417 0
M  V30 6311 H  90.3595 29.6679 22.6065 0
M  V30 6312 S  92.4358 28.4978 22.8026 0
M  V30 6313 C  91.9094 27.6446 24.3111 0
M  V30 6314 H  92.5380 26.7745 24.4921 0
M  V30 6315 H  92.0011 28.3063 25.1710 0
M  V30 6316 H  90.8724 27.3192 24.2283 0
M  V30 6317 N  91.5804 34.1906 20.6790 0
M  V30 6318 H  91.0746 33.6571 19.9847 0
M  V30 6319 C  92.0707 35.5108 20.2574 0 CFG=2
M  V30 6320 H  93.0155 35.7025 20.7699 0
M  V30 6321 C  91.1226 36.6706 20.6513 0
M  V30 6322 O  91.5072 37.8286 20.4895 0
M  V30 6323 C  92.3546 35.5750 18.7274 0 CFG=2
M  V30 6324 H  92.7698 36.5627 18.5196 0
M  V30 6325 C  91.0978 35.4269 17.8389 0
M  V30 6326 H  90.6769 34.4417 18.0090 0
M  V30 6327 H  90.3240 36.1373 18.1283 0
M  V30 6328 C  93.4517 34.5649 18.3384 0
M  V30 6329 H  93.7796 34.7026 17.3082 0
M  V30 6330 H  94.3318 34.6767 18.9721 0
M  V30 6331 H  93.1009 33.5379 18.4368 0
M  V30 6332 C  91.3577 35.5957 16.3359 0
M  V30 6333 H  90.4402 35.8679 15.8136 0
M  V30 6334 H  92.0939 36.3759 16.1407 0
M  V30 6335 H  91.7226 34.6677 15.8947 0
M  V30 6336 N  89.9314 36.3482 21.1872 0
M  V30 6337 H  89.6807 35.3731 21.2668 0
M  V30 6338 C  88.9821 37.3006 21.7635 0 CFG=2
M  V30 6339 H  89.1591 38.2881 21.3324 0
M  V30 6340 C  89.1864 37.4189 23.2848 0
M  V30 6341 O  89.2159 38.5367 23.7925 0
M  V30 6342 C  87.5488 36.8764 21.3602 0
M  V30 6343 H  87.5579 36.8039 20.2717 0
M  V30 6344 H  87.3298 35.8705 21.7150 0
M  V30 6345 C  86.3995 37.8330 21.7700 0
M  V30 6346 H  86.7646 38.8521 21.6327 0
M  V30 6347 C  85.1859 37.6797 20.8225 0
M  V30 6348 H  84.9679 38.6237 20.3223 0
M  V30 6349 H  85.3561 36.9379 20.0416 0
M  V30 6350 H  84.2756 37.3747 21.3380 0
M  V30 6351 C  85.9851 37.6858 23.2532 0
M  V30 6352 H  84.9059 37.6358 23.3943 0
M  V30 6353 H  86.4017 36.7871 23.7086 0
M  V30 6354 H  86.3357 38.5384 23.8354 0
M  V30 6355 N  89.3378 36.2772 23.9808 0
M  V30 6356 H  89.2811 35.3954 23.4874 0
M  V30 6357 C  89.4897 36.1682 25.4392 0 CFG=2
M  V30 6358 H  88.6698 36.7268 25.8935 0
M  V30 6359 C  90.7850 36.7766 26.0068 0
M  V30 6360 O  90.8311 37.0181 27.2110 0
M  V30 6361 C  89.3811 34.6811 25.8470 0
M  V30 6362 H  89.9452 34.0945 25.1215 0
M  V30 6363 H  89.8693 34.5008 26.8068 0
M  V30 6364 C  87.9335 34.1516 25.9462 0
M  V30 6365 H  87.4055 34.4729 25.0479 0
M  V30 6366 C  87.9013 32.6065 25.9456 0
M  V30 6367 H  87.4808 32.1878 26.8595 0
M  V30 6368 H  87.2991 32.2350 25.1161 0
M  V30 6369 H  88.8955 32.1732 25.8328 0
M  V30 6370 C  87.1794 34.7632 27.1481 0
M  V30 6371 H  86.7688 34.0115 27.8217 0
M  V30 6372 H  87.8221 35.4058 27.7509 0
M  V30 6373 H  86.3446 35.3752 26.8059 0
M  V30 6374 N  91.7917 37.0218 25.1523 0
M  V30 6375 H  91.6781 36.7729 24.1799 0
M  V30 6376 C  93.0423 37.7038 25.4941 0 CFG=2
M  V30 6377 H  93.3815 37.3193 26.4573 0
M  V30 6378 C  92.8912 39.2394 25.6322 0
M  V30 6379 O  93.7562 39.8587 26.2481 0
M  V30 6380 C  94.1380 37.3835 24.4304 0 CFG=2
M  V30 6381 H  94.1813 36.2941 24.3791 0
M  V30 6382 C  95.5561 37.8688 24.8198 0
M  V30 6383 H  95.6336 38.9473 24.6796 0
M  V30 6384 H  95.7294 37.6988 25.8822 0
M  V30 6385 C  93.7799 37.8787 23.0154 0
M  V30 6386 H  94.4727 37.4898 22.2692 0
M  V30 6387 H  92.7848 37.5456 22.7343 0
M  V30 6388 H  93.7967 38.9664 22.9436 0
M  V30 6389 C  96.6831 37.1959 24.0213 0
M  V30 6390 H  97.5552 37.0217 24.6518 0
M  V30 6391 H  96.3765 36.2343 23.6094 0
M  V30 6392 H  96.9985 37.8246 23.1885 0
M  V30 6393 N  91.8098 39.8331 25.0876 0
M  V30 6394 H  91.1069 39.2683 24.6298 0
M  V30 6395 C  91.6314 41.2885 24.9881 0 CFG=2
M  V30 6396 H  92.5644 41.6204 24.5315 0
M  V30 6397 C  91.5383 42.1261 26.2997 0
M  V30 6398 O  91.8626 43.3117 26.2187 0
M  V30 6399 C  90.4778 41.6813 24.0040 0 CFG=2
M  V30 6400 H  90.4810 40.9365 23.2064 0
M  V30 6401 C  90.6708 43.0509 23.3073 0
M  V30 6402 H  89.8421 43.2161 22.6175 0
M  V30 6403 H  90.6030 43.8611 24.0331 0
M  V30 6404 C  89.0655 41.6421 24.6281 0
M  V30 6405 H  88.3019 41.7889 23.8637 0
M  V30 6406 H  88.8543 40.6864 25.1008 0
M  V30 6407 H  88.9236 42.4216 25.3770 0
M  V30 6408 C  91.9777 43.1865 22.5114 0
M  V30 6409 H  91.8569 43.8854 21.6835 0
M  V30 6410 H  92.7838 43.5622 23.1423 0
M  V30 6411 H  92.2949 42.2311 22.0921 0
M  V30 6412 N  91.2285 41.5471 27.4912 0
M  V30 6413 C  91.3872 42.2740 28.7681 0 CFG=2
M  V30 6414 H  90.8486 43.2192 28.6778 0
M  V30 6415 C  92.8408 42.5779 29.1795 0
M  V30 6416 O  93.0294 43.4892 29.9818 0
M  V30 6417 C  90.6625 41.4041 29.8096 0
M  V30 6418 H  91.3746 40.7624 30.3272 0
M  V30 6419 H  90.1431 41.9923 30.5674 0
M  V30 6420 C  89.7131 40.5460 28.9927 0
M  V30 6421 H  89.4031 39.6307 29.4956 0
M  V30 6422 H  88.8166 41.1182 28.7505 0
M  V30 6423 C  90.5162 40.2923 27.7280 0
M  V30 6424 H  91.2496 39.5103 27.9134 0
M  V30 6425 H  89.8711 39.9747 26.9121 0
M  V30 6426 N  93.8379 41.8648 28.6167 0
M  V30 6427 H  93.6235 41.1386 27.9463 0
M  V30 6428 C  95.2621 42.1807 28.7860 0 CFG=2
M  V30 6429 H  95.4651 42.2365 29.8580 0
M  V30 6430 C  95.5772 43.5462 28.1369 0
M  V30 6431 O  95.1937 43.7815 26.9904 0
M  V30 6432 C  96.1964 41.0989 28.1651 0
M  V30 6433 H  95.9663 41.0141 27.1020 0
M  V30 6434 C  97.7005 41.4355 28.2637 0
M  V30 6435 H  98.3119 40.6126 27.8925 0
M  V30 6436 H  97.9690 42.3112 27.6727 0
M  V30 6437 H  97.9945 41.6238 29.2969 0
M  V30 6438 C  95.9524 39.7139 28.7902 0
M  V30 6439 H  96.6355 38.9660 28.3862 0
M  V30 6440 H  96.0822 39.7343 29.8729 0
M  V30 6441 H  94.9454 39.3620 28.5796 0
M  V30 6442 N  96.2315 44.4192 28.9150 0
M  V30 6443 H  96.5459 44.1176 29.8251 0
M  V30 6444 C  96.4061 45.8391 28.6107 0
M  V30 6445 H  97.4725 46.0638 28.5712 0
M  V30 6446 H  95.9793 46.1176 27.6461 0
M  V30 6447 C  95.7405 46.6771 29.7141 0
M  V30 6448 O  96.2294 47.7660 30.0112 0
M  V30 6449 N  94.6840 46.1521 30.3673 0
M  V30 6450 H  94.2946 45.2734 30.0519 0
M  V30 6451 C  94.1796 46.6417 31.6582 0 CFG=2
M  V30 6452 H  94.1602 47.7330 31.6514 0
M  V30 6453 C  95.0851 46.1723 32.8158 0
M  V30 6454 O  95.1329 46.8309 33.8540 0
M  V30 6455 C  92.7512 46.1195 31.9091 0
M  V30 6456 H  92.7823 45.0402 32.0619 0
M  V30 6457 H  92.3830 46.5349 32.8489 0
M  V30 6458 C  91.7306 46.4282 30.7998 0
M  V30 6459 H  91.6600 47.5057 30.6476 0
M  V30 6460 H  92.0570 46.0007 29.8516 0
M  V30 6461 C  90.3562 45.8580 31.1673 0
M  V30 6462 H  90.4706 44.8112 31.4532 0
M  V30 6463 H  89.9879 46.3823 32.0499 0
M  V30 6464 C  89.3098 45.9539 30.0551 0
M  V30 6465 H  89.1858 46.9871 29.7293 0
M  V30 6466 H  89.6272 45.3733 29.1884 0
M  V30 6467 N  88.0129 45.4414 30.5293 0 CHG=1
M  V30 6468 H  88.1299 44.5029 30.8956 0
M  V30 6469 H  87.6766 46.0285 31.2788 0
M  V30 6470 H  87.3423 45.4354 29.7749 0
M  V30 6471 N  95.7781 45.0405 32.5915 0
M  V30 6472 H  95.6354 44.5858 31.7030 0
M  V30 6473 C  96.7730 44.3988 33.4462 0 CFG=2
M  V30 6474 H  96.2571 44.0754 34.3517 0
M  V30 6475 C  97.9104 45.3587 33.8428 0
M  V30 6476 O  98.4044 46.1069 32.9984 0
M  V30 6477 C  97.2649 43.1422 32.6829 0
M  V30 6478 H  96.3740 42.5476 32.4752 0
M  V30 6479 H  97.6565 43.4172 31.7020 0
M  V30 6480 C  98.2803 42.2282 33.4105 0
M  V30 6481 H  98.0203 42.2217 34.4697 0
M  V30 6482 C  98.1526 40.7700 32.9152 0
M  V30 6483 H  99.1115 40.2562 32.8496 0
M  V30 6484 H  97.5311 40.1882 33.5958 0
M  V30 6485 H  97.6894 40.7111 31.9294 0
M  V30 6486 C  99.7347 42.7416 33.2918 0
M  V30 6487 H  100.1510 42.9598 34.2760 0
M  V30 6488 H  100.3984 42.0262 32.8089 0
M  V30 6489 H  99.8061 43.6540 32.7008 0
M  V30 6490 N  98.3079 45.2894 35.1208 0
M  V30 6491 H  97.8693 44.6280 35.7454 0
M  V30 6492 C  99.3657 46.1011 35.7191 0 CFG=2
M  V30 6493 H  100.1078 46.3446 34.9557 0
M  V30 6494 C  100.0751 45.2800 36.8087 0
M  V30 6495 O  99.4779 44.3456 37.3462 0
M  V30 6496 C  98.7412 47.4086 36.2573 0
M  V30 6497 H  98.2299 47.9424 35.4549 0
M  V30 6498 H  97.9912 47.1909 37.0192 0
M  V30 6499 O  99.7122 48.2746 36.8112 0
M  V30 6500 H  99.2705 49.0608 37.1412 0
M  V30 6501 N  101.3322 45.6484 37.1089 0
M  V30 6502 H  101.7355 46.4574 36.6578 0
M  V30 6503 C  102.1713 44.9866 38.1082 0 CFG=2
M  V30 6504 H  101.6362 44.1390 38.5276 0
M  V30 6505 C  102.4947 45.9259 39.2773 0
M  V30 6506 O  102.6553 47.1311 39.0826 0
M  V30 6507 C  103.4819 44.4940 37.4510 0
M  V30 6508 H  103.9682 45.3342 36.9523 0
M  V30 6509 H  104.1755 44.1746 38.2295 0
M  V30 6510 C  103.3166 43.3294 36.4495 0
M  V30 6511 H  102.6681 43.6873 35.6485 0
M  V30 6512 C  104.6663 42.9723 35.7913 0
M  V30 6513 H  104.5765 42.9772 34.7050 0
M  V30 6514 H  105.4506 43.6831 36.0541 0
M  V30 6515 H  105.0305 41.9863 36.0789 0
M  V30 6516 C  102.6259 42.0966 37.0708 0
M  V30 6517 H  101.6285 41.9839 36.6533 0
M  V30 6518 H  103.1614 41.1662 36.8841 0
M  V30 6519 H  102.5124 42.1729 38.1504 0
M  V30 6520 N  102.6295 45.3195 40.4647 0
M  V30 6521 H  102.4608 44.3240 40.5320 0
M  V30 6522 C  103.0382 45.9798 41.6981 0
M  V30 6523 H  103.8189 46.7186 41.5093 0
M  V30 6524 H  102.1843 46.4959 42.1390 0
M  V30 6525 C  103.5655 44.9183 42.6732 0
M  V30 6526 O  103.6314 43.7279 42.3568 0
M  V30 6527 N  103.9418 45.3710 43.8780 0
M  V30 6528 H  103.8783 46.3648 44.0756 0
M  V30 6529 C  104.3870 44.5205 44.9807 0
M  V30 6530 H  104.9782 43.6790 44.6147 0
M  V30 6531 H  105.0344 45.1062 45.6325 0
M  V30 6532 C  103.1917 44.0154 45.8038 0
M  V30 6533 O  102.0524 44.4500 45.6241 0
M  V30 6534 N  103.4840 43.0978 46.7389 0
M  V30 6535 H  104.4384 42.7868 46.8433 0
M  V30 6536 C  102.5285 42.5416 47.7012 0 CFG=2
M  V30 6537 H  101.6051 42.3050 47.1712 0
M  V30 6538 C  102.2123 43.5658 48.8121 0
M  V30 6539 O  103.1135 44.2748 49.2623 0
M  V30 6540 C  103.0870 41.2303 48.3370 0 CFG=2
M  V30 6541 H  104.0799 41.4617 48.7270 0
M  V30 6542 C  103.2610 40.1337 47.2582 0
M  V30 6543 H  102.2860 39.7308 46.9909 0
M  V30 6544 H  103.6650 40.5518 46.3363 0
M  V30 6545 C  102.2594 40.6719 49.5212 0
M  V30 6546 H  102.6671 39.7288 49.8840 0
M  V30 6547 H  102.2509 41.3450 50.3784 0
M  V30 6548 H  101.2247 40.4901 49.2300 0
M  V30 6549 C  104.1776 38.9812 47.6828 0
M  V30 6550 H  104.5709 38.4622 46.8084 0
M  V30 6551 H  105.0264 39.3400 48.2651 0
M  V30 6552 H  103.6421 38.2468 48.2847 0
M  V30 6553 N  100.9394 43.6016 49.2355 0
M  V30 6554 H  100.2639 42.9648 48.8371 0
M  V30 6555 C  100.4276 44.4859 50.2843 0 CFG=2
M  V30 6556 H  101.2565 44.8219 50.9103 0
M  V30 6557 C  99.4573 43.7315 51.2078 0
M  V30 6558 O  99.0430 42.6170 50.8923 0
M  V30 6559 C  99.7822 45.7266 49.6235 0
M  V30 6560 H  99.5675 46.4826 50.3800 0
M  V30 6561 H  100.4704 46.1879 48.9139 0
M  V30 6562 O  98.5695 45.4177 48.9602 0
M  V30 6563 H  98.7808 44.9692 48.1373 0
M  V30 6564 N  99.0873 44.3764 52.3262 0
M  V30 6565 H  99.4860 45.2841 52.5379 0
M  V30 6566 C  98.0860 43.9015 53.2869 0 CFG=2
M  V30 6567 H  98.3433 42.8671 53.5214 0
M  V30 6568 C  96.6426 43.8746 52.7431 0
M  V30 6569 O  95.8028 43.2065 53.3425 0
M  V30 6570 C  98.1926 44.7035 54.6056 0
M  V30 6571 H  97.5971 44.1855 55.3573 0
M  V30 6572 H  99.2189 44.6383 54.9664 0
M  V30 6573 C  97.7402 46.1863 54.6046 0
M  V30 6574 H  96.7125 46.2700 54.2494 0
M  V30 6575 H  97.7262 46.5434 55.6347 0
M  V30 6576 C  98.6240 47.1572 53.8136 0
M  V30 6577 O  99.8284 46.8608 53.6421 0
M  V30 6578 O  98.0865 48.2110 53.4138 0 CHG=-1
M  V30 6579 N  96.3855 44.5559 51.6122 0
M  V30 6580 H  97.1302 45.0839 51.1789 0
M  V30 6581 C  95.1174 44.5233 50.8765 0 CFG=2
M  V30 6582 H  94.3047 44.5337 51.6028 0
M  V30 6583 C  94.9291 43.2416 50.0342 0
M  V30 6584 O  93.8547 43.0632 49.4605 0
M  V30 6585 C  94.9916 45.8019 50.0240 0
M  V30 6586 H  95.8348 45.8677 49.3354 0
M  V30 6587 H  94.0962 45.7448 49.4028 0
M  V30 6588 C  94.9058 47.0842 50.8737 0
M  V30 6589 H  94.0278 47.0320 51.5182 0
M  V30 6590 H  95.7677 47.1464 51.5394 0
M  V30 6591 C  94.8519 48.3576 50.0162 0
M  V30 6592 H  95.7095 48.3686 49.3424 0
M  V30 6593 H  93.9695 48.3311 49.3753 0
M  V30 6594 C  94.8566 49.6538 50.8428 0
M  V30 6595 H  95.6773 49.6480 51.5615 0
M  V30 6596 H  95.0190 50.5062 50.1826 0
M  V30 6597 N  93.5833 49.8713 51.5511 0 CHG=1
M  V30 6598 H  93.3932 49.1088 52.1936 0
M  V30 6599 H  93.6320 50.7321 52.0766 0
M  V30 6600 H  92.8282 49.9314 50.8838 0
M  V30 6601 N  95.9420 42.3533 50.0108 0
M  V30 6602 H  96.8064 42.5839 50.4817 0
M  V30 6603 C  95.8580 40.9919 49.4698 0 CFG=2
M  V30 6604 H  95.3580 41.0430 48.5016 0
M  V30 6605 C  95.0233 40.0528 50.3612 0
M  V30 6606 O  94.5017 39.0618 49.8492 0
M  V30 6607 C  97.2751 40.4172 49.2672 0
M  V30 6608 H  97.8843 40.5659 50.1554 0
M  V30 6609 H  97.1874 39.3333 49.1765 0
M  V30 6610 C  98.0406 40.8627 48.0267 0
M  V30 6611 C  97.8333 42.1170 47.4051 0
M  V30 6612 H  97.1435 42.8378 47.8131 0
M  V30 6613 C  98.9600 39.9610 47.4554 0
M  V30 6614 H  99.1506 39.0061 47.9196 0
M  V30 6615 C  98.5102 42.4419 46.2127 0
M  V30 6616 H  98.3359 43.3957 45.7364 0
M  V30 6617 C  99.6226 40.2794 46.2606 0
M  V30 6618 H  100.3023 39.5576 45.8417 0
M  V30 6619 C  99.3971 41.5168 45.6307 0
M  V30 6620 O  100.0391 41.8180 44.4651 0
M  V30 6621 H  100.5797 41.0928 44.1353 0
M  V30 6622 N  94.8767 40.4033 51.6529 0
M  V30 6623 H  95.3539 41.2271 51.9913 0
M  V30 6624 C  93.8738 39.8453 52.5599 0 CFG=2
M  V30 6625 H  93.9782 38.7649 52.5268 0
M  V30 6626 C  92.4769 40.3426 52.1182 0
M  V30 6627 O  92.3753 41.5229 51.7806 0
M  V30 6628 C  94.1581 40.3518 53.9916 0
M  V30 6629 H  94.1040 41.4401 54.0053 0
M  V30 6630 H  93.3535 40.0179 54.6439 0
M  V30 6631 C  95.4998 39.8855 54.5974 0
M  V30 6632 H  96.2878 40.1997 53.9146 0
M  V30 6633 C  95.7989 40.6060 55.9269 0
M  V30 6634 H  96.8508 40.8852 55.9858 0
M  V30 6635 H  95.2198 41.5219 56.0378 0
M  V30 6636 H  95.5725 39.9853 56.7929 0
M  V30 6637 C  95.5776 38.3511 54.7405 0
M  V30 6638 H  96.0029 38.0477 55.6953 0
M  V30 6639 H  94.5968 37.8808 54.6641 0
M  V30 6640 H  96.2069 37.9190 53.9626 0
M  V30 6641 N  91.4295 39.4814 52.1207 0
M  V30 6642 C  90.0586 39.8813 51.7244 0 CFG=2
M  V30 6643 H  90.0987 40.1267 50.6621 0
M  V30 6644 C  89.4768 41.0599 52.5406 0
M  V30 6645 O  89.9584 41.3197 53.6433 0
M  V30 6646 C  89.2336 38.5980 51.9452 0
M  V30 6647 H  88.7582 38.6010 52.9281 0
M  V30 6648 H  88.4498 38.4725 51.2020 0
M  V30 6649 C  90.2333 37.4620 51.8793 0
M  V30 6650 H  89.8972 36.5513 52.3760 0
M  V30 6651 H  90.4378 37.2192 50.8352 0
M  V30 6652 C  91.4739 38.0737 52.5040 0
M  V30 6653 H  91.4456 37.9980 53.5915 0
M  V30 6654 H  92.3534 37.5533 52.1420 0
M  V30 6655 N  88.4308 41.7383 52.0163 0
M  V30 6656 C  87.8160 42.8919 52.7061 0 CFG=2
M  V30 6657 H  88.5890 43.6266 52.9419 0
M  V30 6658 C  87.0861 42.5637 54.0288 0
M  V30 6659 O  86.8018 43.4865 54.7905 0
M  V30 6660 C  86.8746 43.4832 51.6439 0
M  V30 6661 H  85.9959 43.9791 52.0590 0
M  V30 6662 H  87.4180 44.2260 51.0577 0
M  V30 6663 C  86.5076 42.3035 50.7564 0
M  V30 6664 H  85.7175 41.7230 51.2352 0
M  V30 6665 H  86.1577 42.5949 49.7659 0
M  V30 6666 C  87.7898 41.4817 50.7252 0
M  V30 6667 H  87.5685 40.4310 50.5464 0
M  V30 6668 H  88.4483 41.8279 49.9295 0
M  V30 6669 N  86.8294 41.2701 54.2871 0
M  V30 6670 H  87.0803 40.5741 53.5997 0
M  V30 6671 C  86.2359 40.7394 55.5156 0 CFG=2
M  V30 6672 H  85.5159 41.4597 55.9065 0
M  V30 6673 C  87.2757 40.4517 56.6282 0
M  V30 6674 O  86.8609 40.1684 57.7521 0
M  V30 6675 C  85.4828 39.4131 55.2128 0 CFG=2
M  V30 6676 H  84.9632 39.0994 56.1197 0
M  V30 6677 O  86.3632 38.3536 54.8737 0
M  V30 6678 H  86.8886 38.1343 55.6480 0
M  V30 6679 C  84.4167 39.5526 54.1145 0
M  V30 6680 H  83.8886 38.6116 53.9579 0
M  V30 6681 H  83.6758 40.3046 54.3859 0
M  V30 6682 H  84.8513 39.8476 53.1599 0
M  V30 6683 N  88.5838 40.5069 56.3104 0
M  V30 6684 H  88.8497 40.7709 55.3711 0
M  V30 6685 C  89.6939 40.2131 57.2235 0 CFG=2
M  V30 6686 H  89.4992 39.2283 57.6539 0
M  V30 6687 C  89.7789 41.2500 58.3628 0
M  V30 6688 O  89.9018 42.4424 58.0894 0
M  V30 6689 C  90.9918 40.1206 56.3878 0
M  V30 6690 H  90.8691 39.3830 55.5932 0
M  V30 6691 H  91.1852 41.0715 55.8910 0
M  V30 6692 C  92.2372 39.7601 57.1986 0
M  V30 6693 O  92.9119 40.6481 57.7092 0
M  V30 6694 N  92.5589 38.4691 57.2997 0
M  V30 6695 H  93.3804 38.1927 57.8176 0
M  V30 6696 H  91.9933 37.7587 56.8577 0
M  V30 6697 N  89.7091 40.7614 59.6118 0
M  V30 6698 H  89.6323 39.7642 59.7506 0
M  V30 6699 C  89.6129 41.5711 60.8283 0 CFG=2
M  V30 6700 H  88.7996 42.2791 60.6578 0
M  V30 6701 C  90.8615 42.4092 61.1694 0
M  V30 6702 O  90.6942 43.5129 61.6878 0
M  V30 6703 C  89.1732 40.6669 61.9982 0
M  V30 6704 H  88.9239 41.2781 62.8666 0
M  V30 6705 H  88.2693 40.1147 61.7379 0
M  V30 6706 O  90.1839 39.7515 62.3782 0
M  V30 6707 H  89.8611 39.2268 63.1150 0
M  V30 6708 N  92.0727 41.9011 60.8736 0
M  V30 6709 H  92.1483 40.9861 60.4531 0
M  V30 6710 C  93.3267 42.6207 61.1277 0 CFG=2
M  V30 6711 H  93.2021 43.1693 62.0637 0
M  V30 6712 C  93.6437 43.6769 60.0440 0
M  V30 6713 O  94.2643 44.6905 60.3681 0
M  V30 6714 C  94.5265 41.6551 61.3493 0
M  V30 6715 H  94.2161 40.9573 62.1284 0
M  V30 6716 C  94.9172 40.7995 60.1318 0
M  V30 6717 H  95.8002 40.2000 60.3512 0
M  V30 6718 H  94.1197 40.1042 59.8755 0
M  V30 6719 H  95.1475 41.4010 59.2531 0
M  V30 6720 C  95.7706 42.3667 61.9046 0
M  V30 6721 H  96.5109 41.6343 62.2222 0
M  V30 6722 H  96.2434 43.0126 61.1657 0
M  V30 6723 H  95.5231 42.9765 62.7730 0
M  V30 6724 N  93.1371 43.4744 58.8122 0
M  V30 6725 H  92.6574 42.6080 58.6082 0
M  V30 6726 C  93.1020 44.4946 57.7624 0 CFG=2
M  V30 6727 H  94.1052 44.9184 57.6807 0
M  V30 6728 C  92.1341 45.6393 58.1226 0
M  V30 6729 O  92.5019 46.7992 57.9531 0
M  V30 6730 C  92.7525 43.8534 56.3995 0
M  V30 6731 H  93.4863 43.0887 56.1456 0
M  V30 6732 H  91.7956 43.3393 56.4854 0
M  V30 6733 C  92.6521 44.8749 55.2518 0
M  V30 6734 H  91.9879 45.7059 55.4855 0
M  V30 6735 H  93.6475 45.3059 55.1329 0
M  V30 6736 C  92.2255 44.2789 53.9102 0
M  V30 6737 H  93.0851 43.7942 53.4487 0
M  V30 6738 H  91.4488 43.5223 54.0190 0
M  V30 6739 N  91.8530 45.3689 53.0017 0
M  V30 6740 H  91.8881 46.3044 53.3981 0
M  V30 6741 C  91.4281 45.2624 51.7381 0
M  V30 6742 N  91.0531 46.3692 51.0880 0
M  V30 6743 H  90.7047 46.3181 50.1415 0
M  V30 6744 H  91.0801 47.2580 51.5715 0
M  V30 6745 N  91.3631 44.0795 51.1234 0 CHG=1
M  V30 6746 H  91.0057 44.0191 50.1767 0
M  V30 6747 H  91.6968 43.2376 51.5808 0
M  V30 6748 N  90.9338 45.2967 58.6250 0
M  V30 6749 H  90.6919 44.3181 58.7072 0
M  V30 6750 C  89.9262 46.2506 59.1008 0 CFG=2
M  V30 6751 H  89.7056 46.9308 58.2752 0
M  V30 6752 C  90.4129 47.1132 60.2782 0
M  V30 6753 O  90.1263 48.3085 60.2965 0
M  V30 6754 C  88.6298 45.5042 59.4703 0
M  V30 6755 H  88.8830 44.6596 60.1109 0
M  V30 6756 H  87.9857 46.1504 60.0697 0
M  V30 6757 C  87.8222 45.0177 58.2503 0
M  V30 6758 H  87.4339 45.8772 57.7026 0
M  V30 6759 H  88.4654 44.4803 57.5547 0
M  V30 6760 C  86.6535 44.1012 58.6290 0
M  V30 6761 O  86.4375 43.7805 59.7963 0
M  V30 6762 N  85.8855 43.6676 57.6301 0
M  V30 6763 H  85.1015 43.0628 57.8246 0
M  V30 6764 H  86.0964 43.9190 56.6723 0
M  V30 6765 N  91.1743 46.5028 61.2048 0
M  V30 6766 H  91.3430 45.5091 61.1260 0
M  V30 6767 C  91.8246 47.1774 62.3293 0 CFG=2
M  V30 6768 H  91.0556 47.7343 62.8683 0
M  V30 6769 C  92.9104 48.1791 61.8990 0
M  V30 6770 O  93.0683 49.1918 62.5764 0
M  V30 6771 C  92.4099 46.1274 63.2865 0
M  V30 6772 H  92.8608 46.5984 64.1611 0
M  V30 6773 H  91.6370 45.4471 63.6451 0
M  V30 6774 H  93.1811 45.5284 62.8016 0
M  V30 6775 N  93.6106 47.8925 60.7857 0
M  V30 6776 H  93.4205 47.0296 60.2952 0
M  V30 6777 C  94.6106 48.7676 60.1727 0 CFG=2
M  V30 6778 H  95.2140 49.1889 60.9788 0
M  V30 6779 C  93.9735 49.9496 59.4183 0
M  V30 6780 O  94.3992 51.0839 59.6246 0
M  V30 6781 C  95.5485 47.9223 59.2717 0
M  V30 6782 H  96.0435 47.1708 59.8890 0
M  V30 6783 H  94.9537 47.3541 58.5578 0
M  V30 6784 C  96.6244 48.7007 58.4793 0
M  V30 6785 H  97.2129 47.9976 57.8890 0
M  V30 6786 H  96.1601 49.3766 57.7595 0
M  V30 6787 C  97.5884 49.4741 59.3810 0
M  V30 6788 O  98.2229 48.8917 60.2542 0
M  V30 6789 N  97.7146 50.7836 59.1724 0
M  V30 6790 H  98.3348 51.3344 59.7469 0
M  V30 6791 H  97.1562 51.2582 58.4695 0
M  V30 6792 N  92.9753 49.6654 58.5645 0
M  V30 6793 H  92.6870 48.7029 58.4422 0
M  V30 6794 C  92.3047 50.6485 57.7073 0 CFG=2
M  V30 6795 H  93.0840 51.2247 57.2034 0
M  V30 6796 C  91.4511 51.6710 58.4810 0
M  V30 6797 O  91.4623 52.8462 58.1134 0
M  V30 6798 C  91.4873 49.9179 56.6214 0
M  V30 6799 H  90.8394 49.1803 57.0994 0
M  V30 6800 H  90.8218 50.6216 56.1182 0
M  V30 6801 C  92.3807 49.2246 55.5678 0
M  V30 6802 H  93.0058 49.9716 55.0773 0
M  V30 6803 H  93.0635 48.5233 56.0462 0
M  V30 6804 C  91.6091 48.4593 54.4888 0
M  V30 6805 O  92.2201 48.2181 53.4236 0
M  V30 6806 O  90.4411 48.0892 54.7334 0 CHG=-1
M  V30 6807 N  90.7754 51.2294 59.5577 0
M  V30 6808 H  90.7870 50.2448 59.7899 0
M  V30 6809 C  90.0596 52.1078 60.4901 0 CFG=2
M  V30 6810 H  89.5280 52.8596 59.9049 0
M  V30 6811 C  91.0013 52.8904 61.4221 0
M  V30 6812 O  90.6328 53.9812 61.8519 0
M  V30 6813 C  89.0266 51.2973 61.3038 0
M  V30 6814 H  89.5256 50.4504 61.7763 0
M  V30 6815 H  88.6486 51.8989 62.1325 0
M  V30 6816 C  87.8307 50.7724 60.4781 0
M  V30 6817 H  88.1855 50.1291 59.6721 0
M  V30 6818 H  87.1993 50.1487 61.1108 0
M  V30 6819 C  86.9510 51.8783 59.8829 0
M  V30 6820 O  86.7591 52.9046 60.5722 0
M  V30 6821 O  86.4794 51.6765 58.7431 0 CHG=-1
M  V30 6822 N  92.2064 52.3584 61.6857 0
M  V30 6823 H  92.4458 51.4541 61.3038 0
M  V30 6824 C  93.2760 53.0649 62.3903 0 CFG=2
M  V30 6825 H  92.8272 53.5408 63.2648 0
M  V30 6826 C  93.8961 54.2144 61.5734 0
M  V30 6827 O  94.1711 55.2654 62.1469 0
M  V30 6828 C  94.2943 52.0484 62.9398 0
M  V30 6829 H  93.8428 51.5518 63.7973 0
M  V30 6830 H  94.4838 51.2689 62.2050 0
M  V30 6831 C  95.6366 52.5975 63.3727 0
M  V30 6832 C  95.7580 53.3114 64.5815 0
M  V30 6833 H  94.9111 53.4066 65.2452 0
M  V30 6834 C  96.7342 52.5360 62.4918 0
M  V30 6835 H  96.6446 52.0318 61.5403 0
M  V30 6836 C  96.9674 53.9041 64.9121 0
M  V30 6837 H  97.0574 54.4488 65.8369 0
M  V30 6838 C  97.9342 53.1271 62.8486 0
M  V30 6839 H  98.7741 53.0455 62.1804 0
M  V30 6840 C  98.0531 53.8105 64.0521 0
M  V30 6841 H  98.9916 54.2729 64.3191 0
M  V30 6842 N  94.0432 54.0178 60.2513 0
M  V30 6843 H  93.8302 53.1089 59.8616 0
M  V30 6844 C  94.4276 55.0547 59.2834 0 CFG=2
M  V30 6845 H  95.2736 55.5893 59.7183 0
M  V30 6846 C  93.3394 56.1210 59.0491 0
M  V30 6847 O  93.6598 57.1630 58.4808 0
M  V30 6848 C  94.9083 54.4709 57.9328 0
M  V30 6849 H  94.0746 53.9348 57.4759 0
M  V30 6850 H  95.1923 55.2623 57.2381 0
M  V30 6851 C  96.0869 53.5019 58.0512 0
M  V30 6852 O  96.0940 52.5109 57.2885 0
M  V30 6853 O  97.0151 53.8114 58.8311 0 CHG=-1
M  V30 6854 N  92.0973 55.8647 59.4961 0
M  V30 6855 H  91.9072 54.9729 59.9308 0
M  V30 6856 C  90.9903 56.8205 59.4788 0 CFG=2
M  V30 6857 H  91.1413 57.5246 58.6580 0
M  V30 6858 C  90.9354 57.6386 60.7854 0
M  V30 6859 O  90.7358 58.8512 60.7169 0
M  V30 6860 C  89.6804 56.0561 59.1925 0
M  V30 6861 H  89.8146 55.4737 58.2795 0
M  V30 6862 H  89.4877 55.3317 59.9824 0
M  V30 6863 C  88.4380 56.9455 59.0209 0
M  V30 6864 H  88.2295 57.4769 59.9501 0
M  V30 6865 H  88.6451 57.7069 58.2684 0
M  V30 6866 C  87.1985 56.1273 58.6223 0
M  V30 6867 H  87.3996 55.5786 57.7011 0
M  V30 6868 H  87.0138 55.3683 59.3831 0
M  V30 6869 C  85.9283 56.9725 58.4502 0
M  V30 6870 H  85.0767 56.3213 58.2507 0
M  V30 6871 H  85.7059 57.5167 59.3687 0
M  V30 6872 N  86.0527 57.9296 57.3369 0 CHG=1
M  V30 6873 H  86.8204 58.5598 57.5201 0
M  V30 6874 H  86.2289 57.4269 56.4785 0
M  V30 6875 H  85.1971 58.4588 57.2478 0
M  V30 6876 N  91.1435 56.9732 61.9381 0
M  V30 6877 H  91.2734 55.9707 61.9084 0
M  V30 6878 C  91.2207 57.5859 63.2725 0 CFG=2
M  V30 6879 H  90.3651 58.2525 63.3901 0
M  V30 6880 C  92.4894 58.4359 63.4720 0
M  V30 6881 O  92.4345 59.4335 64.1905 0
M  V30 6882 C  91.1665 56.4781 64.3515 0
M  V30 6883 H  91.9041 55.7162 64.0933 0
M  V30 6884 H  91.4864 56.8741 65.3171 0
M  V30 6885 C  89.7821 55.8171 64.5386 0
M  V30 6886 H  89.4123 55.5435 63.5504 0
M  V30 6887 C  89.8978 54.5020 65.3421 0
M  V30 6888 H  89.6153 53.6500 64.7227 0
M  V30 6889 H  90.9156 54.3203 65.6891 0
M  V30 6890 H  89.2576 54.4798 66.2236 0
M  V30 6891 C  88.7473 56.7932 65.1427 0
M  V30 6892 H  88.3176 56.4355 66.0782 0
M  V30 6893 H  89.1791 57.7716 65.3535 0
M  V30 6894 H  87.9198 56.9513 64.4508 0
M  V30 6895 N  93.5933 58.0209 62.8321 0
M  V30 6896 H  93.5483 57.1684 62.2888 0
M  V30 6897 C  94.9000 58.6700 62.8503 0 CFG=2
M  V30 6898 H  94.8396 59.6595 63.3027 0
M  V30 6899 C  95.3615 58.7856 61.3825 0
M  V30 6900 O  95.9983 57.8479 60.9004 0
M  V30 6901 C  95.8787 57.8499 63.7239 0
M  V30 6902 H  95.9982 56.8371 63.3359 0
M  V30 6903 H  96.8680 58.3067 63.6731 0
M  V30 6904 C  95.4861 57.7664 65.1892 0
M  V30 6905 C  95.6940 58.8720 66.0400 0
M  V30 6906 H  96.2021 59.7532 65.6761 0
M  V30 6907 C  94.7519 56.6614 65.6717 0
M  V30 6908 H  94.5251 55.8346 65.0153 0
M  V30 6909 C  95.2389 58.8329 67.3500 0
M  V30 6910 H  95.4029 59.6822 67.9944 0
M  V30 6911 C  94.3162 56.6362 66.9898 0
M  V30 6912 H  93.7696 55.7816 67.3608 0
M  V30 6913 C  94.5687 57.7143 67.8282 0
M  V30 6914 H  94.2240 57.6908 68.8511 0
M  V30 6915 N  94.9735 59.8891 60.6889 0
M  V30 6916 C  95.1459 60.0938 59.2330 0 CFG=2
M  V30 6917 H  94.3357 59.5483 58.7507 0
M  V30 6918 C  96.4797 59.6664 58.5891 0
M  V30 6919 O  97.4763 60.3796 58.7055 0
M  V30 6920 C  94.8516 61.5898 59.0428 0
M  V30 6921 H  95.7303 62.1981 59.2636 0
M  V30 6922 H  94.5231 61.8309 58.0313 0
M  V30 6923 C  93.7799 61.8675 60.0764 0
M  V30 6924 H  93.6677 62.9249 60.3175 0
M  V30 6925 H  92.8197 61.5008 59.7095 0
M  V30 6926 C  94.2282 61.0199 61.2598 0
M  V30 6927 H  94.8992 61.5934 61.9010 0
M  V30 6928 H  93.3632 60.7163 61.8490 0
M  V30 6929 N  96.4376 58.5205 57.8868 0
M  V30 6930 H  95.5763 57.9897 57.8873 0
M  V30 6931 C  97.4909 58.0494 56.9886 0
M  V30 6932 H  97.1157 57.1842 56.4415 0
M  V30 6933 H  97.7063 58.8204 56.2471 0
M  V30 6934 C  98.7866 57.6427 57.7039 0
M  V30 6935 O  99.8619 58.0171 57.2366 0
M  V30 6936 N  98.6998 56.8741 58.8072 0
M  V30 6937 H  97.7914 56.6070 59.1611 0
M  V30 6938 C  99.8652 56.2940 59.4965 0 CFG=2
M  V30 6939 H  100.5525 57.1119 59.7211 0
M  V30 6940 C  100.6312 55.2737 58.6207 0
M  V30 6941 O  101.8480 55.1550 58.7626 0
M  V30 6942 C  99.4100 55.6770 60.8380 0
M  V30 6943 H  98.7795 56.3981 61.3610 0
M  V30 6944 H  98.7631 54.8211 60.6449 0
M  V30 6945 C  100.5135 55.2551 61.8060 0
M  V30 6946 C  101.1574 54.0037 61.6740 0
M  V30 6947 H  100.8898 53.3401 60.8646 0
M  V30 6948 C  100.8713 56.1021 62.8768 0
M  V30 6949 H  100.3855 57.0590 62.9973 0
M  V30 6950 C  102.1379 53.6012 62.6026 0
M  V30 6951 H  102.6164 52.6385 62.4937 0
M  V30 6952 C  101.8500 55.6992 63.8076 0
M  V30 6953 H  102.1108 56.3510 64.6283 0
M  V30 6954 C  102.4821 54.4475 63.6745 0
M  V30 6955 O  103.4206 54.0578 64.5867 0
M  V30 6956 H  103.8340 53.2143 64.3792 0
M  V30 6957 N  99.9114 54.5916 57.7117 0
M  V30 6958 H  98.9091 54.7259 57.6944 0
M  V30 6959 C  100.4383 53.6836 56.6927 0 CFG=2
M  V30 6960 H  101.2547 53.1053 57.1285 0
M  V30 6961 C  101.0028 54.4798 55.4938 0
M  V30 6962 O  100.3636 54.5562 54.4444 0
M  V30 6963 C  99.2970 52.7105 56.3138 0
M  V30 6964 H  98.8857 52.2741 57.2230 0
M  V30 6965 H  98.4794 53.2822 55.8712 0
M  V30 6966 C  99.6672 51.5628 55.3576 0
M  V30 6967 H  98.7047 51.1367 55.0694 0
M  V30 6968 H  100.1281 51.8863 54.4240 0
M  V30 6969 C  100.4383 50.4219 56.0374 0
M  V30 6970 H  101.1998 50.7422 56.7483 0
M  V30 6971 H  99.7060 49.8634 56.6220 0
M  V30 6972 N  100.8872 49.4188 55.0657 0
M  V30 6973 H  100.2216 48.6875 54.8418 0
M  V30 6974 C  102.0270 49.4475 54.3585 0
M  V30 6975 N  102.9225 50.4350 54.5064 0
M  V30 6976 H  103.7693 50.4509 53.9571 0
M  V30 6977 H  102.7387 51.1892 55.1518 0
M  V30 6978 N  102.2580 48.4608 53.4852 0 CHG=1
M  V30 6979 H  103.0984 48.4373 52.9272 0
M  V30 6980 H  101.5561 47.7335 53.3738 0
M  V30 6981 N  102.1808 55.0921 55.6951 0
M  V30 6982 H  102.6331 55.0045 56.5952 0
M  V30 6983 C  102.8717 55.9481 54.7255 0 CFG=2
M  V30 6984 H  102.1311 56.5598 54.2061 0
M  V30 6985 C  103.6584 55.1361 53.6694 0
M  V30 6986 O  103.8826 53.9367 53.8429 0
M  V30 6987 C  103.8728 56.8880 55.4586 0 CFG=2
M  V30 6988 H  104.3450 57.5409 54.7229 0
M  V30 6989 O  104.9206 56.1731 56.0915 0
M  V30 6990 H  105.3994 55.6693 55.4294 0
M  V30 6991 C  103.2046 57.8029 56.4966 0
M  V30 6992 H  103.9291 58.4868 56.9395 0
M  V30 6993 H  102.4219 58.4069 56.0371 0
M  V30 6994 H  102.7513 57.2367 57.3094 0
M  V30 6995 N  104.0867 55.8397 52.6050 0
M  V30 6996 H  103.8482 56.8189 52.5401 0
M  V30 6997 C  104.8786 55.3137 51.4834 0 CFG=2
M  V30 6998 H  105.4130 54.4411 51.8632 0
M  V30 6999 C  105.9359 56.3467 51.0209 0
M  V30 7000 O  105.8017 56.8811 49.9187 0
M  V30 7001 C  103.9478 54.7938 50.3459 0
M  V30 7002 H  104.5137 54.5868 49.4363 0
M  V30 7003 H  103.5493 53.8274 50.6583 0
M  V30 7004 C  102.7272 55.6716 50.0187 0
M  V30 7005 O  101.6075 55.3557 50.4131 0
M  V30 7006 N  102.9351 56.7748 49.2974 0
M  V30 7007 H  102.1622 57.3790 49.0593 0
M  V30 7008 H  103.8721 57.0181 49.0041 0
M  V30 7009 N  106.9513 56.6587 51.8662 0
M  V30 7010 C  107.9424 57.7090 51.5562 0 CFG=2
M  V30 7011 H  107.4016 58.6314 51.3351 0
M  V30 7012 C  108.8781 57.3411 50.3919 0
M  V30 7013 O  109.4219 56.2360 50.3750 0
M  V30 7014 C  108.7353 57.8877 52.8704 0
M  V30 7015 H  109.7140 57.4069 52.8117 0
M  V30 7016 H  108.9121 58.9372 53.1092 0
M  V30 7017 C  107.9123 57.1915 53.9411 0
M  V30 7018 H  108.5056 56.8487 54.7893 0
M  V30 7019 H  107.1475 57.8729 54.3170 0
M  V30 7020 C  107.2484 56.0633 53.1697 0
M  V30 7021 H  107.9492 55.2410 53.0231 0
M  V30 7022 H  106.3976 55.6736 53.7187 0
M  V30 7023 N  109.0735 58.3015 49.4754 0
M  V30 7024 H  108.5872 59.1825 49.5764 0
M  V30 7025 C  110.1590 58.2984 48.4934 0 CFG=2
M  V30 7026 H  110.3695 57.2771 48.1745 0
M  V30 7027 C  111.4126 58.8816 49.1691 0
M  V30 7028 O  111.2863 59.7791 50.0039 0
M  V30 7029 C  109.7687 59.1267 47.2502 0
M  V30 7030 H  109.5088 60.1420 47.5475 0
M  V30 7031 H  110.6647 59.2203 46.6339 0
M  V30 7032 C  108.6471 58.5028 46.3802 0
M  V30 7033 H  108.8722 57.4399 46.2791 0
M  V30 7034 C  107.2497 58.6218 47.0223 0
M  V30 7035 H  106.4636 58.7524 46.2786 0
M  V30 7036 H  107.0044 57.7200 47.5823 0
M  V30 7037 H  107.1901 59.4611 47.7161 0
M  V30 7038 C  108.6495 59.0746 44.9455 0
M  V30 7039 H  108.5621 58.2756 44.2086 0
M  V30 7040 H  107.8234 59.7649 44.7742 0
M  V30 7041 H  109.5645 59.6200 44.7180 0
M  V30 7042 N  112.5910 58.3435 48.8209 0
M  V30 7043 H  112.6345 57.6356 48.0992 0
M  V30 7044 C  113.8409 58.6072 49.5393 0 CFG=2
M  V30 7045 H  113.7131 59.4256 50.2487 0
M  V30 7046 C  114.9725 59.0037 48.5712 0
M  V30 7047 O  115.0368 58.4771 47.4612 0
M  V30 7048 C  114.2809 57.3414 50.3271 0 CFG=2
M  V30 7049 H  114.5013 56.5333 49.6314 0
M  V30 7050 O  113.2243 56.9090 51.1641 0
M  V30 7051 H  112.4562 56.7285 50.6169 0
M  V30 7052 C  115.5001 57.5302 51.2374 0
M  V30 7053 H  115.7356 56.6107 51.7742 0
M  V30 7054 H  116.3911 57.8132 50.6812 0
M  V30 7055 H  115.3059 58.3048 51.9787 0
M  V30 7056 N  115.8483 59.9114 49.0331 0
M  V30 7057 H  115.7145 60.2870 49.9648 0
M  V30 7058 C  117.0700 60.3566 48.3627 0 CFG=2
M  V30 7059 H  117.2442 59.7852 47.4493 0
M  V30 7060 C  118.2431 60.1110 49.3239 0
M  V30 7061 O  118.2712 60.7158 50.3962 0
M  V30 7062 C  116.9603 61.8678 48.0369 0
M  V30 7063 H  116.7433 62.4096 48.9593 0
M  V30 7064 H  117.9298 62.2380 47.7000 0
M  V30 7065 C  115.8994 62.2464 46.9796 0
M  V30 7066 H  114.9419 61.8670 47.3343 0
M  V30 7067 C  115.7475 63.7781 46.8715 0
M  V30 7068 H  114.6977 64.0661 46.9169 0
M  V30 7069 H  116.2568 64.3012 47.6811 0
M  V30 7070 H  116.1500 64.1736 45.9395 0
M  V30 7071 C  116.1601 61.5918 45.6101 0
M  V30 7072 H  116.1131 62.3017 44.7847 0
M  V30 7073 H  117.1405 61.1203 45.5636 0
M  V30 7074 H  115.4146 60.8213 45.4111 0
M  V30 7075 N  119.1816 59.2332 48.9325 0
M  V30 7076 H  119.0882 58.7534 48.0462 0
M  V30 7077 C  120.3240 58.8348 49.7581 0 CFG=2
M  V30 7078 H  120.2351 59.2590 50.7584 0
M  V30 7079 C  121.6269 59.3585 49.1316 0
M  V30 7080 O  122.1378 58.7761 48.1762 0
M  V30 7081 C  120.4063 57.2933 49.9269 0
M  V30 7082 H  120.5147 56.8302 48.9472 0
M  V30 7083 C  121.6146 56.8300 50.7690 0
M  V30 7084 H  121.5437 55.7692 51.0021 0
M  V30 7085 H  122.5596 56.9759 50.2452 0
M  V30 7086 H  121.6775 57.3703 51.7130 0
M  V30 7087 C  119.0978 56.7414 50.5136 0
M  V30 7088 H  119.2025 55.7060 50.8285 0
M  V30 7089 H  118.7697 57.3177 51.3751 0
M  V30 7090 H  118.2975 56.7794 49.7750 0
M  V30 7091 N  122.1165 60.4698 49.6946 0
M  V30 7092 H  121.6415 60.8476 50.5023 0
M  V30 7093 C  123.3241 61.1881 49.2976 0 CFG=2
M  V30 7094 H  123.4208 61.1703 48.2105 0
M  V30 7095 C  124.5560 60.5249 49.9430 0
M  V30 7096 O  124.5364 60.2869 51.1479 0
M  V30 7097 C  123.2524 62.6689 49.7921 0 CFG=2
M  V30 7098 H  123.1857 62.6718 50.8810 0
M  V30 7099 C  121.9993 63.3944 49.2415 0
M  V30 7100 H  122.1774 64.4701 49.2108 0
M  V30 7101 H  121.8293 63.1066 48.2030 0
M  V30 7102 C  124.5122 63.4836 49.4386 0
M  V30 7103 H  124.4217 64.5216 49.7611 0
M  V30 7104 H  125.4119 63.0913 49.9115 0
M  V30 7105 H  124.6703 63.4809 48.3637 0
M  V30 7106 C  120.7205 63.1678 50.0690 0
M  V30 7107 H  119.9320 62.7337 49.4545 0
M  V30 7108 H  120.8750 62.5109 50.9251 0
M  V30 7109 H  120.3482 64.1108 50.4630 0
M  V30 7110 N  125.6077 60.2701 49.1488 0
M  V30 7111 H  125.5563 60.4698 48.1583 0
M  V30 7112 C  126.8623 59.6767 49.6169 0 CFG=2
M  V30 7113 H  127.0680 60.0519 50.6213 0
M  V30 7114 C  128.0287 60.1189 48.7236 0
M  V30 7115 O  127.8731 60.1561 47.5031 0
M  V30 7116 C  126.7162 58.1371 49.6924 0
M  V30 7117 H  125.9345 57.8984 50.4144 0
M  V30 7118 H  126.3596 57.7580 48.7329 0
M  V30 7119 C  128.0072 57.3873 50.0880 0
M  V30 7120 H  128.7479 57.4508 49.2905 0
M  V30 7121 H  128.4514 57.8581 50.9642 0
M  V30 7122 C  127.7690 55.9072 50.3872 0
M  V30 7123 O  127.0078 55.2379 49.6924 0
M  V30 7124 N  128.4471 55.3815 51.4096 0
M  V30 7125 H  128.3346 54.4061 51.6434 0
M  V30 7126 H  129.0766 55.9520 51.9564 0
M  V30 7127 N  129.1826 60.4097 49.3489 0
M  V30 7128 H  129.2414 60.3291 50.3549 0
M  V30 7129 C  130.4308 60.7314 48.6553 0 CFG=2
M  V30 7130 H  130.2004 61.1393 47.6712 0
M  V30 7131 C  131.2945 59.4704 48.4524 0
M  V30 7132 O  131.3672 58.6210 49.3422 0
M  V30 7133 C  131.2527 61.8106 49.4202 0 CFG=2
M  V30 7134 H  130.6691 62.7279 49.4790 0
M  V30 7135 O  132.4434 62.1397 48.7302 0
M  V30 7136 H  132.2069 62.6325 47.9365 0
M  V30 7137 C  131.6763 61.4361 50.8448 0
M  V30 7138 H  132.2510 62.2545 51.2752 0
M  V30 7139 H  130.8153 61.2580 51.4868 0
M  V30 7140 H  132.3031 60.5482 50.8785 0
M  V30 7141 N  131.9596 59.4029 47.2879 0
M  V30 7142 H  131.8488 60.1410 46.6072 0
M  V30 7143 C  132.9592 58.3872 46.9499 0 CFG=2
M  V30 7144 H  132.5883 57.4221 47.3006 0
M  V30 7145 C  134.3271 58.6219 47.6281 0
M  V30 7146 O  135.1184 57.6830 47.7050 0
M  V30 7147 C  133.0726 58.3091 45.4132 0
M  V30 7148 H  133.6906 57.4570 45.1271 0
M  V30 7149 H  132.0919 58.1462 44.9643 0
M  V30 7150 O  133.6474 59.4789 44.8600 0
M  V30 7151 H  133.7198 59.3656 43.9092 0
M  V30 7152 N  134.5731 59.8511 48.1174 0
M  V30 7153 H  133.8680 60.5692 48.0130 0
M  V30 7154 C  135.8007 60.2646 48.8089 0 CFG=2
M  V30 7155 H  136.6562 59.8112 48.3041 0
M  V30 7156 C  135.8536 59.8004 50.2801 0
M  V30 7157 O  136.9184 59.8945 50.8906 0
M  V30 7158 C  135.9547 61.8043 48.7376 0
M  V30 7159 H  135.1526 62.2889 49.2967 0
M  V30 7160 H  136.8842 62.1099 49.2205 0
M  V30 7161 C  135.9501 62.3621 47.3095 0
M  V30 7162 O  134.8952 62.6814 46.7654 0
M  V30 7163 N  137.1304 62.4903 46.7004 0
M  V30 7164 H  137.1728 62.8544 45.7596 0
M  V30 7165 H  137.9839 62.2226 47.1684 0
M  V30 7166 N  134.7153 59.3250 50.8215 0
M  V30 7167 H  133.8962 59.2835 50.2311 0
M  V30 7168 C  134.5122 58.8244 52.1892 0 CFG=2
M  V30 7169 H  133.4733 58.4917 52.1892 0
M  V30 7170 C  134.6203 59.9045 53.2940 0
M  V30 7171 O  134.6740 59.5577 54.4738 0
M  V30 7172 C  135.4077 57.5845 52.4562 0
M  V30 7173 H  135.7153 57.1367 51.5099 0
M  V30 7174 H  136.3341 57.8763 52.9535 0
M  V30 7175 C  134.7606 56.4746 53.2550 0
M  V30 7176 N  134.0444 56.6877 54.4211 0
M  V30 7177 H  133.8859 57.5817 54.8672 0
M  V30 7178 C  134.6962 55.1160 53.0332 0
M  V30 7179 H  135.1197 54.5374 52.2253 0
M  V30 7180 C  133.5908 55.5029 54.8360 0
M  V30 7181 H  132.9864 55.3741 55.7225 0
M  V30 7182 N  133.9531 54.5010 54.0440 0
M  V30 7183 N  134.6216 61.1912 52.9076 0
M  V30 7184 H  134.5568 61.4063 51.9234 0
M  V30 7185 C  134.6612 62.3425 53.8140 0 CFG=2
M  V30 7186 H  135.3312 62.0929 54.6354 0
M  V30 7187 C  133.2513 62.6499 54.3686 0
M  V30 7188 O  132.2759 62.2297 53.7505 0
M  V30 7189 C  135.2163 63.5591 53.0333 0
M  V30 7190 H  134.5087 63.8442 52.2527 0
M  V30 7191 H  135.2763 64.4207 53.6987 0
M  V30 7192 C  136.6006 63.3506 52.3799 0
M  V30 7193 H  136.5111 62.6478 51.5523 0
M  V30 7194 H  136.9417 64.2884 51.9407 0
M  V30 7195 C  137.6736 62.8549 53.3530 0
M  V30 7196 O  137.9202 63.4811 54.3809 0
M  V30 7197 N  138.3203 61.7331 53.0294 0
M  V30 7198 H  139.0389 61.3720 53.6394 0
M  V30 7199 H  138.0791 61.2229 52.1898 0
M  V30 7200 N  133.1373 63.4038 55.4882 0
M  V30 7201 C  131.8328 63.8894 55.9881 0 CFG=2
M  V30 7202 H  131.2554 63.0127 56.2816 0
M  V30 7203 C  131.0429 64.7290 54.9637 0
M  V30 7204 O  131.5446 65.7597 54.5126 0
M  V30 7205 C  132.1982 64.7036 57.2439 0
M  V30 7206 H  132.3287 65.7608 57.0064 0
M  V30 7207 H  131.4364 64.6376 58.0211 0
M  V30 7208 C  133.5306 64.1350 57.6971 0
M  V30 7209 H  134.1010 64.8151 58.3302 0
M  V30 7210 H  133.3584 63.2155 58.2587 0
M  V30 7211 C  134.2245 63.8045 56.3828 0
M  V30 7212 H  134.7142 64.6897 55.9753 0
M  V30 7213 H  134.9778 63.0333 56.5415 0
M  V30 7214 N  129.8341 64.2575 54.6087 0
M  V30 7215 H  129.4867 63.4065 55.0308 0
M  V30 7216 C  128.9021 64.9537 53.7186 0 CFG=2
M  V30 7217 H  129.4664 65.2799 52.8429 0
M  V30 7218 C  128.3256 66.1914 54.4297 0
M  V30 7219 O  127.6093 66.0525 55.4238 0
M  V30 7220 C  127.7545 64.0169 53.2289 0
M  V30 7221 H  127.3838 63.4633 54.0926 0
M  V30 7222 C  126.5367 64.7223 52.5885 0
M  V30 7223 H  125.8138 63.9925 52.2228 0
M  V30 7224 H  126.0016 65.3569 53.2946 0
M  V30 7225 H  126.8354 65.3408 51.7422 0
M  V30 7226 C  128.3043 62.9813 52.2344 0
M  V30 7227 H  127.5432 62.2510 51.9574 0
M  V30 7228 H  128.6564 63.4590 51.3199 0
M  V30 7229 H  129.1450 62.4372 52.6600 0
M  V30 7230 N  128.6950 67.3706 53.9076 0
M  V30 7231 H  129.2797 67.3775 53.0838 0
M  V30 7232 C  128.3239 68.6817 54.4342 0 CFG=2
M  V30 7233 H  128.4429 68.6493 55.5194 0
M  V30 7234 C  126.8543 69.0442 54.1271 0
M  V30 7235 O  126.2696 68.5237 53.1746 0
M  V30 7236 C  129.2842 69.7774 53.8736 0 CFG=2
M  V30 7237 H  130.2974 69.5445 54.2042 0
M  V30 7238 O  128.9848 71.0703 54.3705 0
M  V30 7239 H  129.1436 71.0815 55.3181 0
M  V30 7240 C  129.2973 69.9001 52.3398 0
M  V30 7241 H  129.9619 70.7016 52.0157 0
M  V30 7242 H  129.6585 68.9826 51.8790 0
M  V30 7243 H  128.3080 70.1126 51.9365 0
M  V30 7244 N  126.3067 69.9590 54.9439 0
M  V30 7245 H  126.8455 70.2943 55.7333 0
M  V30 7246 C  124.9732 70.5592 54.8455 0 CFG=2
M  V30 7247 H  124.2699 69.7375 54.9799 0
M  V30 7248 C  124.6757 71.1926 53.4716 0
M  V30 7249 O  123.5230 71.1632 53.0481 0
M  V30 7250 C  124.6621 71.6013 55.9568 0
M  V30 7251 H  125.0588 72.5832 55.6937 0
M  V30 7252 H  123.5781 71.7216 55.9982 0
M  V30 7253 C  125.1435 71.2805 57.3816 0
M  V30 7254 O  124.3446 71.5366 58.3080 0
M  V30 7255 O  126.3268 70.9054 57.5421 0 CHG=-1
M  V30 7256 N  125.7102 71.7297 52.7989 0
M  V30 7257 H  126.6291 71.7106 53.2194 0
M  V30 7258 C  125.6219 72.3424 51.4720 0 CFG=2
M  V30 7259 H  124.8204 73.0826 51.5029 0
M  V30 7260 C  125.2959 71.3511 50.3387 0
M  V30 7261 O  124.5889 71.7329 49.4077 0
M  V30 7262 C  126.9342 73.0842 51.1776 0
M  V30 7263 H  126.8991 73.5810 50.2071 0
M  V30 7264 H  127.1272 73.8509 51.9286 0
M  V30 7265 H  127.7875 72.4051 51.1715 0
M  V30 7266 N  125.7956 70.1064 50.4405 0
M  V30 7267 H  126.3456 69.8588 51.2513 0
M  V30 7268 C  125.5724 69.0370 49.4628 0 CFG=2
M  V30 7269 H  125.7374 69.4563 48.4676 0
M  V30 7270 C  124.1349 68.4953 49.4818 0
M  V30 7271 O  123.5463 68.3257 48.4143 0
M  V30 7272 C  126.6033 67.9108 49.6755 0
M  V30 7273 H  126.6233 67.6410 50.7316 0
M  V30 7274 H  126.2889 67.0106 49.1467 0
M  V30 7275 C  128.0146 68.2948 49.1893 0
M  V30 7276 H  128.0011 68.4234 48.1061 0
M  V30 7277 H  128.3107 69.2554 49.6102 0
M  V30 7278 C  129.0871 67.2721 49.5734 0
M  V30 7279 O  129.0133 66.6369 50.6229 0
M  V30 7280 N  130.1157 67.1319 48.7364 0
M  V30 7281 H  130.8588 66.4835 48.9517 0
M  V30 7282 H  130.1405 67.6480 47.8660 0
M  V30 7283 N  123.5859 68.2717 50.6887 0
M  V30 7284 H  124.1307 68.4299 51.5248 0
M  V30 7285 C  122.1938 67.8582 50.8806 0 CFG=2
M  V30 7286 H  121.9676 67.1034 50.1240 0
M  V30 7287 C  121.1825 69.0036 50.6646 0
M  V30 7288 O  120.0714 68.7207 50.2264 0
M  V30 7289 C  121.9472 67.2078 52.2717 0 CFG=2
M  V30 7290 H  120.8760 67.0212 52.3575 0
M  V30 7291 C  122.3360 68.1000 53.4724 0
M  V30 7292 H  123.4149 68.2513 53.4638 0
M  V30 7293 H  121.8893 69.0880 53.3766 0
M  V30 7294 C  122.6323 65.8326 52.3543 0
M  V30 7295 H  122.3424 65.3029 53.2603 0
M  V30 7296 H  122.3518 65.1994 51.5149 0
M  V30 7297 H  123.7184 65.9254 52.3507 0
M  V30 7298 C  121.9271 67.5283 54.8380 0
M  V30 7299 H  121.8540 68.3209 55.5829 0
M  V30 7300 H  120.9606 67.0261 54.7927 0
M  V30 7301 H  122.6627 66.8086 55.1990 0
M  V30 7302 N  121.5817 70.2664 50.9073 0
M  V30 7303 H  122.5048 70.4370 51.2840 0
M  V30 7304 C  120.7780 71.4559 50.6037 0 CFG=2
M  V30 7305 H  119.7694 71.2887 50.9857 0
M  V30 7306 C  120.6620 71.7403 49.0960 0
M  V30 7307 O  119.6424 72.2831 48.6694 0
M  V30 7308 C  121.3561 72.6756 51.3343 0
M  V30 7309 H  120.7900 73.5797 51.1067 0
M  V30 7310 H  121.3203 72.5379 52.4151 0
M  V30 7311 H  122.3938 72.8562 51.0522 0
M  V30 7312 N  121.6835 71.3418 48.3174 0
M  V30 7313 H  122.5038 70.9312 48.7417 0
M  V30 7314 C  121.6848 71.4198 46.8578 0 CFG=2
M  V30 7315 H  121.2450 72.3837 46.5926 0
M  V30 7316 C  120.7847 70.3209 46.2482 0
M  V30 7317 O  120.0936 70.6056 45.2723 0
M  V30 7318 C  123.1279 71.3919 46.2967 0
M  V30 7319 H  123.7495 72.0969 46.8487 0
M  V30 7320 H  123.5431 70.3995 46.4686 0
M  V30 7321 C  123.2581 71.7329 44.8046 0
M  V30 7322 O  122.3979 72.4798 44.2876 0
M  V30 7323 O  124.2595 71.2863 44.2042 0 CHG=-1
M  V30 7324 N  120.7443 69.1160 46.8556 0
M  V30 7325 H  121.3404 68.9334 47.6509 0
M  V30 7326 C  119.8063 68.0499 46.4715 0 CFG=2
M  V30 7327 H  119.8688 67.9756 45.3836 0
M  V30 7328 C  118.3430 68.4217 46.7951 0
M  V30 7329 O  117.4694 68.0934 45.9949 0
M  V30 7330 C  120.1802 66.6509 47.0808 0 CFG=2
M  V30 7331 H  121.1259 66.7815 47.6097 0
M  V30 7332 C  120.4578 65.6046 45.9760 0
M  V30 7333 H  121.1850 66.0039 45.2748 0
M  V30 7334 H  120.9355 64.7309 46.4211 0
M  V30 7335 C  119.2183 66.0428 48.1289 0
M  V30 7336 H  119.6064 65.0983 48.5007 0
M  V30 7337 H  119.0924 66.6992 48.9865 0
M  V30 7338 H  118.2292 65.8350 47.7207 0
M  V30 7339 C  119.2239 65.1421 45.1830 0
M  V30 7340 H  119.5243 64.6385 44.2652 0
M  V30 7341 H  118.6225 64.4407 45.7608 0
M  V30 7342 H  118.5826 65.9732 44.8942 0
M  V30 7343 N  118.1067 69.1340 47.9157 0
M  V30 7344 H  118.8720 69.3470 48.5412 0
M  V30 7345 C  116.8009 69.6999 48.2653 0 CFG=2
M  V30 7346 H  116.0813 68.8785 48.2720 0
M  V30 7347 C  116.3237 70.7306 47.2327 0
M  V30 7348 O  115.1624 70.6676 46.8462 0
M  V30 7349 C  116.8255 70.3408 49.6681 0
M  V30 7350 H  117.6729 71.0169 49.7640 0
M  V30 7351 H  115.9424 70.9700 49.7755 0
M  V30 7352 C  116.8178 69.3447 50.8358 0
M  V30 7353 H  115.9888 68.6691 50.6365 0
M  V30 7354 H  117.6999 68.7134 50.8863 0
M  V30 7355 C  116.5159 70.0408 52.1706 0
M  V30 7356 H  116.9594 71.0312 52.2766 0
M  V30 7357 H  115.4373 70.2025 52.1852 0
M  V30 7358 N  116.6984 69.1583 53.3283 0
M  V30 7359 H  115.9126 68.5557 53.5455 0
M  V30 7360 C  117.8208 69.0281 54.0543 0
M  V30 7361 N  118.9392 69.6976 53.7399 0
M  V30 7362 H  119.7745 69.5988 54.2986 0
M  V30 7363 H  118.9489 70.3080 52.9361 0
M  V30 7364 N  117.8153 68.2168 55.1186 0 CHG=1
M  V30 7365 H  118.6404 68.1103 55.6913 0
M  V30 7366 H  116.9771 67.7083 55.3611 0
M  V30 7367 N  117.2208 71.6196 46.7721 0
M  V30 7368 H  118.1654 71.6054 47.1316 0
M  V30 7369 C  116.9212 72.6539 45.7754 0 CFG=2
M  V30 7370 H  116.0893 73.2501 46.1571 0
M  V30 7371 C  116.4717 72.0911 44.4102 0
M  V30 7372 O  115.6277 72.7057 43.7586 0
M  V30 7373 C  118.1444 73.5772 45.6123 0
M  V30 7374 H  119.0518 73.0107 45.4051 0
M  V30 7375 H  118.0011 74.2609 44.7743 0
M  V30 7376 O  118.3310 74.3617 46.7731 0
M  V30 7377 H  118.6787 73.7990 47.4717 0
M  V30 7378 N  117.0120 70.9205 44.0294 0
M  V30 7379 H  117.7006 70.4804 44.6242 0
M  V30 7380 C  116.6715 70.2026 42.7999 0 CFG=2
M  V30 7381 H  116.4702 70.9297 42.0104 0
M  V30 7382 C  115.4149 69.3238 42.9566 0
M  V30 7383 O  114.6697 69.1808 41.9891 0
M  V30 7384 C  117.8787 69.3465 42.3635 0
M  V30 7385 H  118.1087 68.6233 43.1483 0
M  V30 7386 H  117.6089 68.7649 41.4811 0
M  V30 7387 C  119.1416 70.1701 42.0418 0
M  V30 7388 H  118.9332 70.8394 41.2065 0
M  V30 7389 H  119.3820 70.8202 42.8802 0
M  V30 7390 C  120.3623 69.2951 41.7006 0
M  V30 7391 H  120.2684 68.3205 42.1801 0
M  V30 7392 H  120.3763 69.1054 40.6267 0
M  V30 7393 C  121.7089 69.8987 42.1220 0
M  V30 7394 H  121.7389 69.9665 43.2063 0
M  V30 7395 H  122.5314 69.2480 41.8248 0
M  V30 7396 N  121.9350 71.2427 41.5656 0 CHG=1
M  V30 7397 H  121.1913 71.8563 41.8668 0
M  V30 7398 H  122.8087 71.5998 41.9301 0
M  V30 7399 H  121.9677 71.2055 40.5577 0
M  V30 7400 N  115.2023 68.7502 44.1546 0
M  V30 7401 H  115.8707 68.8963 44.8994 0
M  V30 7402 C  114.0836 67.8553 44.4657 0 CFG=2
M  V30 7403 H  113.8914 67.2287 43.5929 0
M  V30 7404 C  112.7752 68.5938 44.8020 0
M  V30 7405 O  111.7054 68.0241 44.5924 0
M  V30 7406 C  114.4964 66.9256 45.6131 0
M  V30 7407 H  113.7333 66.1705 45.7990 0
M  V30 7408 H  115.4172 66.3962 45.3691 0
M  V30 7409 H  114.6622 67.4755 46.5407 0
M  V30 7410 N  112.8758 69.8452 45.2843 0
M  V30 7411 H  113.7939 70.2236 45.4801 0
M  V30 7412 C  111.7522 70.7663 45.4881 0 CFG=2
M  V30 7413 H  110.9297 70.2153 45.9458 0
M  V30 7414 C  111.2260 71.3478 44.1651 0
M  V30 7415 O  110.0489 71.7018 44.1038 0
M  V30 7416 C  112.1749 71.9053 46.4389 0
M  V30 7417 H  113.0919 72.3729 46.0759 0
M  V30 7418 H  111.4183 72.6919 46.4265 0
M  V30 7419 C  112.3529 71.4606 47.8974 0
M  V30 7420 H  111.3775 71.3166 48.3569 0
M  V30 7421 H  112.8546 70.4953 47.9478 0
M  V30 7422 S  113.2854 72.6355 48.9125 0
M  V30 7423 C  113.3128 71.7070 50.4631 0
M  V30 7424 H  113.9565 72.2018 51.1894 0
M  V30 7425 H  112.3100 71.6347 50.8806 0
M  V30 7426 H  113.6878 70.6976 50.2962 0
M  V30 7427 N  112.0867 71.4033 43.1307 0
M  V30 7428 H  113.0412 71.1016 43.2643 0
M  V30 7429 C  111.7158 71.7732 41.7640 0 CFG=2
M  V30 7430 H  111.1105 72.6802 41.8162 0
M  V30 7431 C  110.8743 70.6950 41.0529 0
M  V30 7432 O  110.1568 71.0361 40.1127 0
M  V30 7433 C  112.9850 72.1031 40.9645 0
M  V30 7434 H  112.7355 72.4890 39.9755 0
M  V30 7435 H  113.5816 72.8634 41.4699 0
M  V30 7436 H  113.6154 71.2263 40.8236 0
M  V30 7437 N  110.9387 69.4371 41.5307 0
M  V30 7438 H  111.5442 69.2339 42.3128 0
M  V30 7439 C  110.0413 68.3587 41.1189 0 CFG=2
M  V30 7440 H  109.8215 68.4552 40.0535 0
M  V30 7441 C  108.7339 68.4899 41.9292 0
M  V30 7442 O  108.7728 68.4595 43.1606 0
M  V30 7443 C  110.6440 66.9426 41.3789 0 CFG=2
M  V30 7444 H  110.7048 66.7822 42.4562 0
M  V30 7445 C  112.0877 66.7785 40.8462 0
M  V30 7446 H  112.7534 67.4120 41.4307 0
M  V30 7447 H  112.4317 65.7602 41.0319 0
M  V30 7448 C  109.7451 65.8185 40.8250 0
M  V30 7449 H  110.1953 64.8370 40.9769 0
M  V30 7450 H  108.7649 65.8009 41.2995 0
M  V30 7451 H  109.5834 65.9445 39.7567 0
M  V30 7452 C  112.2892 67.1137 39.3604 0
M  V30 7453 H  113.2431 66.7215 39.0068 0
M  V30 7454 H  111.5083 66.6874 38.7322 0
M  V30 7455 H  112.2983 68.1918 39.1985 0
M  V30 7456 N  107.6077 68.6570 41.2174 0
M  V30 7457 H  107.6648 68.6865 40.2100 0
M  V30 7458 C  106.2885 68.8755 41.8136 0
M  V30 7459 H  106.3613 69.5713 42.6517 0
M  V30 7460 H  105.6436 69.3414 41.0681 0
M  V30 7461 C  105.6448 67.5604 42.2797 0
M  V30 7462 O  106.1468 66.4697 42.0087 0
M  V30 7463 N  104.5013 67.6852 42.9714 0
M  V30 7464 H  104.1497 68.6119 43.1662 0
M  V30 7465 C  103.6789 66.5695 43.4486 0
M  V30 7466 H  102.6436 66.9070 43.5035 0
M  V30 7467 H  103.6993 65.7397 42.7400 0
M  V30 7468 C  104.1020 66.0587 44.8363 0
M  V30 7469 O  103.3401 65.3142 45.4506 0
M  V30 7470 N  105.2834 66.4463 45.3448 0
M  V30 7471 H  105.8793 67.0579 44.8061 0
M  V30 7472 C  105.7488 66.1166 46.6926 0 CFG=2
M  V30 7473 H  105.4856 65.0792 46.9041 0
M  V30 7474 C  105.0382 66.9817 47.7446 0
M  V30 7475 O  104.8660 68.1804 47.5210 0
M  V30 7476 C  107.2865 66.2186 46.7448 0
M  V30 7477 H  107.6221 67.1677 46.3232 0
M  V30 7478 H  107.6308 66.2116 47.7783 0
M  V30 7479 C  107.9624 65.0736 46.0087 0
M  V30 7480 C  108.2436 65.1709 44.6285 0
M  V30 7481 H  108.0893 66.1028 44.1059 0
M  V30 7482 C  108.1016 63.8213 46.6435 0
M  V30 7483 H  107.8543 63.7084 47.6870 0
M  V30 7484 C  108.7003 64.0598 43.9318 0
M  V30 7485 H  108.9182 64.1305 42.8784 0
M  V30 7486 C  108.5423 62.7201 45.9244 0
M  V30 7487 H  108.6354 61.7652 46.4134 0
M  V30 7488 C  108.8498 62.8408 44.5769 0
M  V30 7489 H  109.1916 61.9800 44.0226 0
M  V30 7490 N  104.5978 66.3470 48.8450 0
M  V30 7491 H  104.7870 65.3619 48.9692 0
M  V30 7492 C  103.7537 66.9791 49.8639 0 CFG=2
M  V30 7493 H  102.9903 67.5618 49.3428 0
M  V30 7494 C  104.5489 67.9401 50.7649 0
M  V30 7495 O  105.6980 67.6577 51.1003 0
M  V30 7496 C  103.0231 65.9299 50.7576 0 CFG=2
M  V30 7497 H  102.3164 66.4887 51.3739 0
M  V30 7498 C  103.9300 65.1417 51.7416 0
M  V30 7499 H  104.7341 64.6583 51.1916 0
M  V30 7500 H  104.4186 65.8178 52.4425 0
M  V30 7501 C  102.1705 64.9950 49.8779 0
M  V30 7502 H  101.4888 64.3854 50.4705 0
M  V30 7503 H  101.5603 65.5598 49.1723 0
M  V30 7504 H  102.8025 64.3203 49.3035 0
M  V30 7505 C  103.1908 64.0864 52.5759 0
M  V30 7506 H  103.7918 63.7801 53.4322 0
M  V30 7507 H  102.2449 64.4721 52.9572 0
M  V30 7508 H  102.9786 63.1933 51.9878 0
M  V30 7509 N  103.8991 69.0474 51.1466 0
M  V30 7510 H  102.9562 69.2061 50.8224 0
M  V30 7511 C  104.4323 70.0616 52.0510 0 CFG=2
M  V30 7512 H  105.5067 70.1587 51.9103 0
M  V30 7513 C  104.0593 69.6693 53.4971 0
M  V30 7514 O  102.8707 69.7197 53.8197 0
M  V30 7515 C  103.7907 71.4107 51.6756 0
M  V30 7516 H  102.7045 71.3517 51.7700 0
M  V30 7517 H  104.1181 72.1510 52.4018 0
M  V30 7518 C  104.1482 71.9111 50.2613 0
M  V30 7519 H  105.2217 72.0845 50.1888 0
M  V30 7520 H  103.9047 71.1548 49.5145 0
M  V30 7521 C  103.4218 73.2042 49.8805 0
M  V30 7522 O  103.0135 73.9456 50.8013 0
M  V30 7523 O  103.2903 73.4335 48.6589 0 CHG=-1
M  V30 7524 N  105.0374 69.2498 54.3366 0
M  V30 7525 C  104.7281 68.7296 55.6832 0 CFG=2
M  V30 7526 H  103.9534 67.9630 55.6167 0
M  V30 7527 C  104.2474 69.8012 56.6808 0
M  V30 7528 O  103.3802 69.5042 57.5012 0
M  V30 7529 C  106.0436 68.0720 56.1274 0
M  V30 7530 H  106.1903 68.0663 57.2088 0
M  V30 7531 H  106.0580 67.0342 55.7915 0
M  V30 7532 C  107.1268 68.8547 55.4041 0
M  V30 7533 H  107.3465 69.7699 55.9564 0
M  V30 7534 H  108.0570 68.2967 55.2970 0
M  V30 7535 C  106.4782 69.2041 54.0686 0
M  V30 7536 H  106.8716 70.1460 53.6831 0
M  V30 7537 H  106.6833 68.4166 53.3447 0
M  V30 7538 N  104.8060 71.0174 56.5656 0
M  V30 7539 H  105.5197 71.1581 55.8660 0
M  V30 7540 C  104.5180 72.1815 57.4123 0 CFG=2
M  V30 7541 H  103.8401 71.8881 58.2158 0
M  V30 7542 C  103.7734 73.2830 56.6277 0
M  V30 7543 O  103.7220 74.4182 57.1015 0
M  V30 7544 C  105.8005 72.7535 58.0797 0
M  V30 7545 H  106.4050 73.2287 57.3048 0
M  V30 7546 H  105.5358 73.5238 58.8049 0
M  V30 7547 C  106.6940 71.7311 58.7964 0
M  V30 7548 O  106.1601 70.7022 59.2665 0
M  V30 7549 O  107.8978 72.0384 58.9317 0 CHG=-1
M  V30 7550 N  103.2263 72.9423 55.4422 0
M  V30 7551 H  103.2828 71.9755 55.1553 0
M  V30 7552 C  102.6074 73.8523 54.4620 0 CFG=2
M  V30 7553 H  102.3483 73.2249 53.6086 0
M  V30 7554 C  103.6220 74.8959 53.9493 0
M  V30 7555 O  103.3274 76.0908 53.9090 0
M  V30 7556 C  101.2940 74.4828 54.9980 0
M  V30 7557 H  101.4809 75.0847 55.8878 0
M  V30 7558 H  100.8808 75.1686 54.2564 0
M  V30 7559 C  100.2191 73.4403 55.3165 0
M  V30 7560 O  100.0851 73.0069 56.4582 0
M  V30 7561 N  99.4461 73.0364 54.3059 0
M  V30 7562 H  98.7244 72.3495 54.4669 0
M  V30 7563 H  99.5816 73.4081 53.3769 0
M  V30 7564 N  104.8132 74.3965 53.5860 0
M  V30 7565 H  104.9638 73.4008 53.6496 0
M  V30 7566 C  105.9580 75.1653 53.1205 0 CFG=2
M  V30 7567 H  105.5915 76.0337 52.5760 0
M  V30 7568 C  106.7886 74.2188 52.2230 0
M  V30 7569 O  107.2747 73.2067 52.7361 0
M  V30 7570 C  106.7752 75.6873 54.3307 0
M  V30 7571 H  106.1194 76.2847 54.9651 0
M  V30 7572 H  107.1189 74.8388 54.9231 0
M  V30 7573 C  107.9899 76.5577 53.9774 0
M  V30 7574 O  108.1648 76.9038 52.7883 0
M  V30 7575 O  108.7305 76.8785 54.9303 0 CHG=-1
M  V30 7576 N  106.9672 74.5608 50.9217 0
M  V30 7577 C  107.9142 73.8676 50.0229 0 CFG=2
M  V30 7578 H  107.5161 72.8670 49.8551 0
M  V30 7579 C  109.3743 73.7661 50.5099 0
M  V30 7580 O  110.0378 72.7904 50.1660 0
M  V30 7581 C  107.8335 74.6573 48.7055 0
M  V30 7582 H  108.5918 75.4421 48.6761 0
M  V30 7583 H  107.9791 74.0260 47.8282 0
M  V30 7584 C  106.4600 75.2983 48.7278 0
M  V30 7585 H  106.3726 76.1689 48.0776 0
M  V30 7586 H  105.7193 74.5654 48.4079 0
M  V30 7587 C  106.2572 75.6203 50.2016 0
M  V30 7588 H  106.7081 76.5818 50.4507 0
M  V30 7589 H  105.1932 75.6640 50.4367 0
M  V30 7590 N  109.8444 74.7504 51.2986 0
M  V30 7591 H  109.2376 75.5186 51.5603 0
M  V30 7592 C  111.2071 74.8020 51.8374 0 CFG=2
M  V30 7593 H  111.8944 74.5688 51.0221 0
M  V30 7594 C  111.4838 73.7950 52.9713 0
M  V30 7595 O  112.6525 73.4955 53.2135 0
M  V30 7596 C  111.5083 76.2342 52.3026 0
M  V30 7597 H  112.5506 76.3395 52.6052 0
M  V30 7598 H  111.3265 76.9539 51.5039 0
M  V30 7599 H  110.8895 76.5190 53.1534 0
M  V30 7600 N  110.4248 73.2796 53.6219 0
M  V30 7601 H  109.4962 73.5769 53.3549 0
M  V30 7602 C  110.4894 72.2554 54.6733 0 CFG=2
M  V30 7603 H  111.5110 72.2669 55.0588 0
M  V30 7604 C  110.2181 70.8358 54.1396 0
M  V30 7605 O  110.1301 69.9192 54.9545 0
M  V30 7606 C  109.5315 72.6588 55.8225 0
M  V30 7607 H  108.5843 73.0423 55.4417 0
M  V30 7608 H  109.2709 71.7910 56.4299 0
M  V30 7609 C  110.1911 73.6354 56.8007 0
M  V30 7610 O  111.0456 73.2321 57.5874 0
M  V30 7611 N  109.8142 74.9134 56.7681 0
M  V30 7612 H  110.2287 75.5720 57.4099 0
M  V30 7613 H  109.1493 75.2579 56.0855 0
M  V30 7614 N  110.1581 70.6387 52.8098 0
M  V30 7615 H  110.2423 71.4264 52.1825 0
M  V30 7616 C  110.1820 69.3054 52.1958 0 CFG=2
M  V30 7617 H  109.4954 68.6610 52.7485 0
M  V30 7618 C  111.5845 68.6723 52.2669 0
M  V30 7619 O  112.5794 69.3847 52.4100 0
M  V30 7620 C  109.6975 69.3797 50.7343 0
M  V30 7621 H  110.3698 70.0203 50.1634 0
M  V30 7622 H  109.7560 68.3929 50.2722 0
M  V30 7623 C  108.2601 69.8991 50.6011 0
M  V30 7624 H  107.6396 69.3952 51.3381 0
M  V30 7625 H  108.2131 70.9564 50.8506 0
M  V30 7626 S  107.4716 69.6383 48.9883 0
M  V30 7627 C  108.6390 70.4374 47.8611 0
M  V30 7628 H  108.2440 70.4289 46.8453 0
M  V30 7629 H  108.8163 71.4715 48.1531 0
M  V30 7630 H  109.5847 69.8978 47.8621 0
M  V30 7631 N  111.6290 67.3349 52.1445 0
M  V30 7632 H  110.7576 66.8288 52.0490 0
M  V30 7633 C  112.8444 66.5125 52.1268 0 CFG=2
M  V30 7634 H  112.5122 65.4762 52.0769 0
M  V30 7635 C  113.6484 66.5947 53.4353 0
M  V30 7636 O  114.8520 66.8571 53.4173 0
M  V30 7637 C  113.6748 66.7790 50.8502 0
M  V30 7638 H  113.9533 67.8291 50.7829 0
M  V30 7639 H  114.6080 66.2151 50.8829 0
M  V30 7640 C  112.9763 66.3898 49.5853 0
M  V30 7641 C  112.3315 67.2194 48.7330 0
M  V30 7642 H  112.2863 68.2931 48.8413 0
M  V30 7643 C  112.7487 65.0409 49.0854 0
M  V30 7644 N  111.7381 66.4773 47.7314 0
M  V30 7645 H  111.2088 66.8981 46.9794 0
M  V30 7646 C  113.1218 63.7492 49.5250 0
M  V30 7647 H  113.7232 63.6463 50.4158 0
M  V30 7648 C  111.9565 65.1244 47.9018 0
M  V30 7649 C  112.7133 62.5963 48.8280 0
M  V30 7650 H  113.0111 61.6223 49.1843 0
M  V30 7651 C  111.5604 63.9812 47.1875 0
M  V30 7652 H  110.9720 64.0813 46.2884 0
M  V30 7653 C  111.9299 62.7090 47.6646 0
M  V30 7654 H  111.6188 61.8172 47.1424 0
M  V30 7655 N  112.9420 66.3527 54.5516 0
M  V30 7656 H  111.9565 66.1472 54.4705 0
M  V30 7657 C  113.5022 66.2461 55.8976 0 CFG=2
M  V30 7658 H  114.1100 67.1346 56.0767 0
M  V30 7659 C  114.4092 65.0146 56.0440 0
M  V30 7660 O  114.1469 63.9823 55.4244 0
M  V30 7661 C  112.3472 66.1860 56.9233 0
M  V30 7662 H  111.6680 65.3775 56.6475 0
M  V30 7663 H  112.7360 65.9101 57.9055 0
M  V30 7664 C  111.5304 67.4893 57.0626 0
M  V30 7665 H  111.1170 67.7670 56.0932 0
M  V30 7666 H  110.6771 67.3081 57.7169 0
M  V30 7667 C  112.3144 68.6739 57.6425 0
M  V30 7668 O  113.3498 68.5010 58.2831 0
M  V30 7669 N  111.8020 69.8889 57.4422 0
M  V30 7670 H  112.2559 70.7073 57.8220 0
M  V30 7671 H  110.9524 70.0014 56.9046 0
M  V30 7672 N  115.4510 65.1526 56.8789 0
M  V30 7673 H  115.5784 66.0207 57.3785 0
M  V30 7674 C  116.4026 64.0873 57.1924 0 CFG=2
M  V30 7675 H  116.7204 63.6477 56.2484 0
M  V30 7676 C  115.7459 62.9769 58.0334 0
M  V30 7677 O  114.9308 63.2782 58.9070 0
M  V30 7678 C  117.6454 64.7194 57.8543 0
M  V30 7679 H  118.0205 65.5088 57.2006 0
M  V30 7680 H  117.3457 65.2144 58.7798 0
M  V30 7681 C  118.7964 63.7337 58.1546 0
M  V30 7682 H  118.4824 62.9957 58.8930 0
M  V30 7683 H  119.0497 63.1836 57.2480 0
M  V30 7684 C  120.0729 64.4081 58.6725 0
M  V30 7685 O  120.0224 65.6134 59.0008 0
M  V30 7686 O  121.1004 63.6966 58.7258 0 CHG=-1
M  V30 7687 N  116.1065 61.7184 57.7291 0
M  V30 7688 H  116.7868 61.5729 56.9941 0
M  V30 7689 C  115.5808 60.5022 58.3537 0 CFG=2
M  V30 7690 H  114.5073 60.4895 58.1548 0
M  V30 7691 C  115.7930 60.4728 59.8788 0
M  V30 7692 O  116.8910 60.7712 60.3485 0
M  V30 7693 C  116.2114 59.2818 57.6424 0
M  V30 7694 H  115.9228 59.3185 56.5920 0
M  V30 7695 H  117.2988 59.3706 57.6597 0
M  V30 7696 C  115.8256 57.9039 58.2178 0
M  V30 7697 H  116.1745 57.7505 59.2391 0
M  V30 7698 H  114.7355 57.8986 58.2638 0
M  V30 7699 C  116.2364 56.7391 57.3047 0
M  V30 7700 H  115.5064 56.7244 56.4954 0
M  V30 7701 H  117.2132 56.8698 56.8378 0
M  V30 7702 N  116.0680 55.4359 57.9670 0
M  V30 7703 H  116.1848 55.4378 58.9706 0
M  V30 7704 C  115.8881 54.2483 57.3606 0
M  V30 7705 N  115.7553 54.1426 56.0310 0
M  V30 7706 H  115.6251 53.2337 55.6076 0
M  V30 7707 H  115.7621 54.9688 55.4512 0
M  V30 7708 N  115.8469 53.1347 58.0995 0 CHG=1
M  V30 7709 H  115.7872 52.2251 57.6435 0
M  V30 7710 H  116.0029 53.1693 59.0997 0
M  V30 7711 N  114.7347 60.0874 60.6110 0
M  V30 7712 H  113.8644 59.8656 60.1506 0
M  V30 7713 C  114.7686 59.8640 62.0551 0 CFG=2
M  V30 7714 H  115.2699 60.7106 62.5289 0
M  V30 7715 C  115.5342 58.5721 62.3741 0
M  V30 7716 O  115.1930 57.5196 61.8304 0
M  V30 7717 C  113.3288 59.7962 62.5859 0
M  V30 7718 H  113.3142 59.6311 63.6639 0
M  V30 7719 H  112.7964 60.7276 62.3911 0
M  V30 7720 H  112.7642 58.9878 62.1188 0
M  V30 7721 N  116.5633 58.6834 63.2297 0
M  V30 7722 H  116.7796 59.5743 63.6520 0
M  V30 7723 C  117.4338 57.5640 63.5817 0 CFG=2
M  V30 7724 H  117.5581 56.9672 62.6793 0
M  V30 7725 C  116.8065 56.6625 64.6631 0
M  V30 7726 O  116.0878 57.1442 65.5394 0
M  V30 7727 C  118.8391 58.0856 63.9587 0
M  V30 7728 H  119.5337 57.2467 63.9213 0
M  V30 7729 H  119.1968 58.7770 63.1946 0
M  V30 7730 C  118.9961 58.7301 65.3262 0
M  V30 7731 C  119.4111 57.9576 66.4323 0
M  V30 7732 H  119.6091 56.9023 66.3136 0
M  V30 7733 C  118.7392 60.1067 65.4931 0
M  V30 7734 H  118.4252 60.7073 64.6520 0
M  V30 7735 C  119.5629 58.5562 67.6976 0
M  V30 7736 H  119.8770 57.9562 68.5389 0
M  V30 7737 C  118.8926 60.7057 66.7584 0
M  V30 7738 H  118.6938 61.7603 66.8812 0
M  V30 7739 C  119.3039 59.9314 67.8610 0
M  V30 7740 O  119.4506 60.5161 69.0849 0
M  V30 7741 H  119.7109 59.8996 69.7729 0
M  V30 7742 N  117.1278 55.3662 64.5655 0
M  V30 7743 H  117.7272 55.0782 63.8011 0
M  V30 7744 C  116.7038 54.2892 65.4538 0 CFG=2
M  V30 7745 H  115.9970 54.6633 66.1965 0
M  V30 7746 C  117.9128 53.7006 66.2050 0
M  V30 7747 O  119.0303 54.2062 66.0860 0
M  V30 7748 C  116.0044 53.2234 64.5907 0
M  V30 7749 H  115.5816 52.4228 65.1983 0
M  V30 7750 H  115.1824 53.6583 64.0205 0
M  V30 7751 H  116.6942 52.7721 63.8765 0
M  V30 7752 N  117.6571 52.6327 66.9793 0
M  V30 7753 H  116.7108 52.2851 67.0325 0
M  V30 7754 C  118.6362 51.9186 67.8090 0 CFG=2
M  V30 7755 H  119.0816 52.6537 68.4823 0
M  V30 7756 C  119.8024 51.2500 67.0400 0
M  V30 7757 O  120.8423 51.0026 67.6493 0
M  V30 7758 C  117.9415 50.8219 68.6686 0
M  V30 7759 H  118.7136 50.3400 69.2716 0
M  V30 7760 C  116.9541 51.4319 69.6786 0
M  V30 7761 H  116.5356 50.6645 70.3307 0
M  V30 7762 H  117.4470 52.1674 70.3150 0
M  V30 7763 H  116.1212 51.9280 69.1797 0
M  V30 7764 C  117.2625 49.7000 67.8537 0
M  V30 7765 H  116.7946 48.9704 68.5143 0
M  V30 7766 H  116.4841 50.0955 67.2012 0
M  V30 7767 H  117.9724 49.1515 67.2349 0
M  V30 7768 N  119.6224 50.9842 65.7339 0
M  V30 7769 H  118.7452 51.2384 65.3042 0
M  V30 7770 C  120.6170 50.3339 64.8771 0
M  V30 7771 H  121.2143 49.6168 65.4428 0
M  V30 7772 H  120.0866 49.7637 64.1139 0
M  V30 7773 C  121.5524 51.3341 64.1747 0
M  V30 7774 O  122.3461 50.9055 63.3387 0
M  V30 7775 N  121.4386 52.6444 64.4618 0
M  V30 7776 H  120.7665 52.9356 65.1583 0
M  V30 7777 C  122.1775 53.7223 63.8047 0 CFG=2
M  V30 7778 H  122.0345 53.6136 62.7286 0
M  V30 7779 C  123.6851 53.6990 64.1056 0
M  V30 7780 O  124.0773 53.9554 65.2452 0
M  V30 7781 C  121.5644 55.0657 64.2312 0
M  V30 7782 H  122.0392 55.9021 63.7187 0
M  V30 7783 H  120.5037 55.1022 63.9951 0
M  V30 7784 H  121.6556 55.2312 65.3044 0
M  V30 7785 N  124.4924 53.4378 63.0633 0
M  V30 7786 H  124.0816 53.1894 62.1727 0
M  V30 7787 C  125.9557 53.5470 63.0857 0 CFG=2
M  V30 7788 H  126.2968 53.1876 64.0586 0
M  V30 7789 C  126.4583 55.0011 62.9464 0
M  V30 7790 O  127.5601 55.2904 63.4106 0
M  V30 7791 C  126.5606 52.6009 62.0261 0
M  V30 7792 H  127.6397 52.5281 62.1671 0
M  V30 7793 H  126.1640 51.5916 62.1441 0
M  V30 7794 O  126.3242 53.0340 60.7011 0
M  V30 7795 H  125.4284 52.7825 60.4584 0
M  V30 7796 N  125.6237 55.8860 62.3667 0
M  V30 7797 H  124.7421 55.5431 62.0088 0
M  V30 7798 C  125.7734 57.3464 62.3026 0 CFG=2
M  V30 7799 H  124.9101 57.7080 61.7424 0
M  V30 7800 C  127.0069 57.8194 61.5037 0
M  V30 7801 O  127.6558 58.7836 61.9091 0
M  V30 7802 C  125.7007 57.9692 63.7225 0
M  V30 7803 H  126.5738 57.6672 64.3028 0
M  V30 7804 H  125.7490 59.0568 63.6497 0
M  V30 7805 C  124.4287 57.5901 64.5004 0
M  V30 7806 H  123.5482 57.8822 63.9267 0
M  V30 7807 H  124.3805 56.5090 64.6017 0
M  V30 7808 C  124.3658 58.2248 65.8977 0
M  V30 7809 H  125.3242 58.1071 66.4053 0
M  V30 7810 H  124.2139 59.2995 65.7911 0
M  V30 7811 C  123.2400 57.6478 66.7692 0
M  V30 7812 H  123.1156 58.2572 67.6647 0
M  V30 7813 H  122.2925 57.6732 66.2309 0
M  V30 7814 N  123.5296 56.2651 67.1925 0 CHG=1
M  V30 7815 H  122.7704 55.9160 67.7595 0
M  V30 7816 H  123.6407 55.6695 66.3816 0
M  V30 7817 H  124.3839 56.2482 67.7307 0
M  V30 7818 N  127.2936 57.1403 60.3775 0
M  V30 7819 H  126.7135 56.3526 60.1285 0
M  V30 7820 C  128.3687 57.4526 59.4272 0 CFG=2
M  V30 7821 H  129.3060 57.4017 59.9770 0
M  V30 7822 C  128.1293 58.8469 58.7860 0
M  V30 7823 O  127.1442 58.9859 58.0591 0
M  V30 7824 C  128.4338 56.3419 58.3469 0
M  V30 7825 H  128.5049 55.3758 58.8486 0
M  V30 7826 H  127.5078 56.3502 57.7726 0
M  V30 7827 C  129.6023 56.4356 57.3512 0
M  V30 7828 O  130.4194 57.3793 57.4501 0
M  V30 7829 O  129.6545 55.5444 56.4777 0 CHG=-1
M  V30 7830 N  129.0109 59.8464 59.0476 0
M  V30 7831 C  128.8994 61.1884 58.4356 0 CFG=2
M  V30 7832 H  127.9399 61.6076 58.7448 0
M  V30 7833 C  129.0015 61.2486 56.8992 0
M  V30 7834 O  128.4875 62.2047 56.3193 0
M  V30 7835 C  130.0386 61.9995 59.0826 0
M  V30 7836 H  130.9231 62.0060 58.4432 0
M  V30 7837 H  129.7625 63.0379 59.2684 0
M  V30 7838 C  130.3746 61.2571 60.3609 0
M  V30 7839 H  131.3825 61.4547 60.7267 0
M  V30 7840 H  129.6690 61.5419 61.1429 0
M  V30 7841 C  130.1429 59.8040 59.9770 0
M  V30 7842 H  131.0091 59.3956 59.4545 0
M  V30 7843 H  129.9753 59.2131 60.8757 0
M  V30 7844 N  129.6625 60.2552 56.2736 0
M  V30 7845 H  130.0367 59.4876 56.8174 0
M  V30 7846 C  129.9215 60.1943 54.8292 0 CFG=2
M  V30 7847 H  130.1885 61.2060 54.5325 0
M  V30 7848 C  128.7083 59.8326 53.9478 0
M  V30 7849 O  128.8685 59.7216 52.7317 0
M  V30 7850 C  131.1525 59.2976 54.5658 0
M  V30 7851 H  131.5468 59.5032 53.5701 0
M  V30 7852 H  131.9555 59.5265 55.2672 0
M  V30 7853 O  130.8613 57.9151 54.6233 0
M  V30 7854 H  130.7072 57.6610 55.5424 0
M  V30 7855 N  127.5266 59.6835 54.5618 0
M  V30 7856 H  127.4722 59.7962 55.5649 0
M  V30 7857 C  126.2730 59.3430 53.9054 0 CFG=2
M  V30 7858 H  126.2703 59.8509 52.9410 0
M  V30 7859 C  125.0922 59.8953 54.7235 0
M  V30 7860 O  125.0714 59.7701 55.9476 0
M  V30 7861 C  126.1472 57.8089 53.6458 0
M  V30 7862 H  126.8207 57.5865 52.8189 0
M  V30 7863 C  126.6236 56.9486 54.8305 0
M  V30 7864 H  126.4817 55.8872 54.6279 0
M  V30 7865 H  127.6879 57.0848 55.0209 0
M  V30 7866 H  126.0940 57.2012 55.7478 0
M  V30 7867 C  124.7508 57.3447 53.1783 0
M  V30 7868 H  124.7747 56.3030 52.8587 0
M  V30 7869 H  124.0059 57.4210 53.9711 0
M  V30 7870 H  124.3974 57.9306 52.3308 0
M  V30 7871 N  124.1418 60.5122 54.0068 0
M  V30 7872 H  124.2338 60.5361 52.9981 0
M  V30 7873 C  122.9187 61.1151 54.5314 0 CFG=2
M  V30 7874 H  122.8219 60.8954 55.5935 0
M  V30 7875 C  121.7018 60.5268 53.8056 0
M  V30 7876 O  121.8259 60.0840 52.6642 0
M  V30 7877 C  122.9648 62.6425 54.3072 0
M  V30 7878 H  123.0765 62.8370 53.2398 0
M  V30 7879 H  122.0099 63.0883 54.5919 0
M  V30 7880 C  124.0896 63.3796 55.0540 0
M  V30 7881 H  125.0845 62.9862 54.8441 0
M  V30 7882 H  124.0859 64.3898 54.6438 0
M  V30 7883 C  123.8247 63.5327 56.5574 0
M  V30 7884 H  123.0259 64.2688 56.6575 0
M  V30 7885 H  123.4708 62.6223 57.0395 0
M  V30 7886 N  124.9653 64.1496 57.2441 0
M  V30 7887 H  125.8500 64.1083 56.7571 0
M  V30 7888 C  124.9303 64.7167 58.4618 0
M  V30 7889 N  123.8040 64.7591 59.1909 0
M  V30 7890 H  123.7923 65.2019 60.0975 0
M  V30 7891 H  122.9382 64.3563 58.8403 0
M  V30 7892 N  126.0518 65.2561 58.9552 0 CHG=1
M  V30 7893 H  126.0525 65.6951 59.8643 0
M  V30 7894 H  126.9010 65.2505 58.4079 0
M  V30 7895 N  120.5393 60.5632 54.4750 0
M  V30 7896 H  120.5100 60.9381 55.4141 0
M  V30 7897 C  119.2630 60.1142 53.9222 0 CFG=2
M  V30 7898 H  119.3422 59.9746 52.8429 0
M  V30 7899 C  118.1996 61.1922 54.1844 0
M  V30 7900 O  117.9274 61.5053 55.3434 0
M  V30 7901 C  118.7879 58.7710 54.5533 0
M  V30 7902 H  118.7241 58.8948 55.6350 0
M  V30 7903 C  117.3948 58.3267 54.0664 0
M  V30 7904 H  117.1381 57.3327 54.4317 0
M  V30 7905 H  116.5981 58.9984 54.3849 0
M  V30 7906 H  117.3821 58.2925 52.9800 0
M  V30 7907 C  119.7889 57.6325 54.2882 0
M  V30 7908 H  119.4262 56.6922 54.6963 0
M  V30 7909 H  119.9490 57.4875 53.2240 0
M  V30 7910 H  120.7637 57.8229 54.7316 0
M  V30 7911 N  117.6093 61.7046 53.0933 0
M  V30 7912 H  117.8943 61.3728 52.1799 0
M  V30 7913 C  116.4582 62.6090 53.0896 0 CFG=2
M  V30 7914 H  116.2215 62.9321 54.1028 0
M  V30 7915 C  115.2440 61.8533 52.5286 0
M  V30 7916 O  115.4181 60.9528 51.7076 0
M  V30 7917 C  116.7593 63.8446 52.2100 0
M  V30 7918 H  116.8384 63.5374 51.1655 0
M  V30 7919 H  115.9001 64.5154 52.2583 0
M  V30 7920 C  118.0319 64.6401 52.5812 0
M  V30 7921 H  118.8916 64.0042 52.3682 0
M  V30 7922 C  118.1711 65.8940 51.6961 0
M  V30 7923 H  119.1455 65.9231 51.2120 0
M  V30 7924 H  117.4175 65.9303 50.9085 0
M  V30 7925 H  118.0722 66.8134 52.2725 0
M  V30 7926 C  118.1083 65.0055 54.0722 0
M  V30 7927 H  118.5147 64.1813 54.6576 0
M  V30 7928 H  118.7668 65.8559 54.2418 0
M  V30 7929 H  117.1259 65.2555 54.4714 0
M  V30 7930 N  114.0339 62.2320 52.9671 0
M  V30 7931 H  113.9453 62.9794 53.6445 0
M  V30 7932 C  112.7967 61.5331 52.6128 0 CFG=2
M  V30 7933 H  112.8820 61.2128 51.5743 0
M  V30 7934 C  111.5776 62.4650 52.6669 0
M  V30 7935 O  111.5496 63.4002 53.4684 0
M  V30 7936 C  112.6392 60.2660 53.4882 0
M  V30 7937 H  111.7237 59.7443 53.2040 0
M  V30 7938 H  113.4489 59.5776 53.2412 0
M  V30 7939 C  112.6200 60.5283 55.0126 0
M  V30 7940 H  113.4906 61.1132 55.3109 0
M  V30 7941 H  111.7432 61.1198 55.2794 0
M  V30 7942 C  112.6507 59.2396 55.8380 0
M  V30 7943 O  113.4100 58.3185 55.5439 0
M  V30 7944 N  111.8542 59.1851 56.9072 0
M  V30 7945 H  111.8441 58.3591 57.4879 0
M  V30 7946 H  111.2478 59.9594 57.1354 0
M  V30 7947 N  110.5914 62.1782 51.8006 0
M  V30 7948 H  110.6858 61.3874 51.1750 0
M  V30 7949 C  109.3545 62.9462 51.6661 0 CFG=2
M  V30 7950 H  108.9706 63.2231 52.6512 0
M  V30 7951 C  108.2540 62.0731 51.0366 0
M  V30 7952 O  108.5500 61.2098 50.2091 0
M  V30 7953 C  109.5927 64.2109 50.8011 0
M  V30 7954 H  110.6046 64.5790 50.9649 0
M  V30 7955 H  109.5346 63.9959 49.7322 0
M  V30 7956 C  108.6879 65.3785 51.1962 0
M  V30 7957 O  108.9333 66.0489 52.1955 0
M  V30 7958 N  107.6384 65.6254 50.4148 0
M  V30 7959 H  107.0116 66.3911 50.6374 0
M  V30 7960 H  107.4374 65.0387 49.6176 0
M  V30 7961 N  106.9943 62.3487 51.4142 0
M  V30 7962 H  106.8334 63.0865 52.0847 0
M  V30 7963 C  105.8068 61.6980 50.8603 0
M  V30 7964 H  105.9826 60.6300 50.7196 0
M  V30 7965 H  104.9890 61.7959 51.5738 0
M  V30 7966 C  105.3922 62.3456 49.5289 0
M  V30 7967 O  105.8571 63.4292 49.1713 0
M  V30 7968 N  104.4815 61.6691 48.8146 0
M  V30 7969 H  104.1068 60.8049 49.1787 0
M  V30 7970 C  103.9624 62.0725 47.5074 0 CFG=2
M  V30 7971 H  104.3009 63.0794 47.2633 0
M  V30 7972 C  102.4271 62.0922 47.5523 0
M  V30 7973 O  101.8250 61.2536 48.2248 0
M  V30 7974 C  104.5072 61.0757 46.4621 0
M  V30 7975 H  105.5858 60.9813 46.5933 0
M  V30 7976 H  104.0956 60.0904 46.6885 0
M  V30 7977 C  104.2451 61.4153 44.9784 0
M  V30 7978 H  103.1835 61.6339 44.8645 0
M  V30 7979 C  105.0382 62.6460 44.4992 0
M  V30 7980 H  105.8730 62.3753 43.8543 0
M  V30 7981 H  104.3969 63.3141 43.9260 0
M  V30 7982 H  105.4622 63.2168 45.3234 0
M  V30 7983 C  104.5286 60.1980 44.0915 0
M  V30 7984 H  103.9838 60.2658 43.1498 0
M  V30 7985 H  105.5901 60.1168 43.8637 0
M  V30 7986 H  104.2265 59.2682 44.5722 0
M  V30 7987 N  101.8319 63.0589 46.8322 0
M  V30 7988 H  102.4073 63.7062 46.3083 0
M  V30 7989 C  100.3915 63.3398 46.8029 0 CFG=2
M  V30 7990 H  100.0821 63.4909 47.8389 0
M  V30 7991 C  99.5198 62.1992 46.2251 0
M  V30 7992 O  98.3458 62.1108 46.5834 0
M  V30 7993 C  100.1137 64.6508 46.0046 0 CFG=2
M  V30 7994 H  100.8317 65.3814 46.3800 0
M  V30 7995 C  98.7117 65.2405 46.2842 0
M  V30 7996 H  97.9477 64.6549 45.7719 0
M  V30 7997 H  98.4861 65.1612 47.3483 0
M  V30 7998 C  100.3588 64.5264 44.4818 0
M  V30 7999 H  100.3657 65.5056 44.0033 0
M  V30 8000 H  101.3183 64.0573 44.2650 0
M  V30 8001 H  99.5871 63.9328 43.9909 0
M  V30 8002 C  98.5685 66.7129 45.8724 0
M  V30 8003 H  97.7096 67.1697 46.3646 0
M  V30 8004 H  99.4501 67.2946 46.1430 0
M  V30 8005 H  98.4197 66.8088 44.7967 0
M  V30 8006 N  100.1060 61.3491 45.3650 0
M  V30 8007 H  101.0795 61.4753 45.1285 0
M  V30 8008 C  99.4312 60.2313 44.7130 0 CFG=2
M  V30 8009 H  98.6270 59.8932 45.3629 0
M  V30 8010 C  100.4805 59.1262 44.4680 0
M  V30 8011 O  101.3900 59.3554 43.6683 0
M  V30 8012 C  98.7970 60.7454 43.3958 0
M  V30 8013 H  98.1221 61.5729 43.6182 0
M  V30 8014 H  99.5672 61.1504 42.7378 0
M  V30 8015 C  97.9692 59.6980 42.6380 0
M  V30 8016 O  97.5358 58.6943 43.2010 0
M  V30 8017 N  97.7395 59.9362 41.3469 0
M  V30 8018 H  97.2024 59.2847 40.7943 0
M  V30 8019 H  98.1567 60.7395 40.8921 0
M  V30 8020 N  100.3540 57.9532 45.1371 0
M  V30 8021 C  101.3054 56.8405 44.9567 0 CFG=2
M  V30 8022 H  102.3246 57.2143 45.0649 0
M  V30 8023 C  101.2229 56.1153 43.5967 0
M  V30 8024 O  102.1517 55.3764 43.2749 0
M  V30 8025 C  100.9973 55.9038 46.1330 0
M  V30 8026 H  101.2352 54.8565 45.9414 0
M  V30 8027 H  101.5813 56.2135 46.9986 0
M  V30 8028 C  99.5208 56.1222 46.4107 0
M  V30 8029 H  98.9322 55.5363 45.7032 0
M  V30 8030 H  99.2205 55.8325 47.4180 0
M  V30 8031 C  99.3264 57.6076 46.1243 0
M  V30 8032 H  98.3112 57.7884 45.7700 0
M  V30 8033 H  99.4930 58.1992 47.0260 0
M  V30 8034 N  100.1591 56.3580 42.8078 0
M  V30 8035 H  99.4167 56.9581 43.1390 0
M  V30 8036 C  100.0380 55.8882 41.4244 0 CFG=2
M  V30 8037 H  100.2719 54.8219 41.4068 0
M  V30 8038 C  101.0091 56.6025 40.4640 0
M  V30 8039 O  101.4820 55.9754 39.5168 0
M  V30 8040 C  98.5862 56.0628 40.9563 0
M  V30 8041 H  98.4441 55.6553 39.9547 0
M  V30 8042 H  97.8937 55.5454 41.6210 0
M  V30 8043 H  98.2980 57.1136 40.9282 0
M  V30 8044 N  101.3144 57.8804 40.7534 0
M  V30 8045 H  100.8791 58.3195 41.5521 0
M  V30 8046 C  102.2852 58.7092 40.0278 0 CFG=2
M  V30 8047 H  102.2483 58.4228 38.9746 0
M  V30 8048 C  103.7398 58.4744 40.4792 0
M  V30 8049 O  104.6385 59.0378 39.8555 0
M  V30 8050 C  101.9578 60.2245 40.0984 0
M  V30 8051 H  102.1191 60.5616 41.1238 0
M  V30 8052 H  102.6383 60.7869 39.4579 0
M  V30 8053 C  100.5269 60.6070 39.7040 0
M  V30 8054 O  100.0975 61.6974 40.1395 0
M  V30 8055 O  99.9009 59.8496 38.9304 0 CHG=-1
M  V30 8056 N  103.9620 57.6657 41.5342 0
M  V30 8057 H  103.1752 57.2203 41.9855 0
M  V30 8058 C  105.2769 57.4027 42.1270 0 CFG=2
M  V30 8059 H  105.6783 58.3623 42.4391 0
M  V30 8060 C  106.3105 56.7858 41.1757 0
M  V30 8061 O  107.4897 57.0999 41.3193 0
M  V30 8062 C  105.1268 56.5417 43.3841 0
M  V30 8063 H  106.0784 56.4661 43.9090 0
M  V30 8064 H  104.4106 56.9729 44.0809 0
M  V30 8065 H  104.7942 55.5324 43.1409 0
M  V30 8066 N  105.8504 55.9710 40.2099 0
M  V30 8067 H  104.8588 55.7844 40.1573 0
M  V30 8068 C  106.6600 55.3717 39.1464 0 CFG=2
M  V30 8069 H  107.4511 54.8070 39.6384 0
M  V30 8070 C  107.3486 56.4053 38.2325 0
M  V30 8071 O  108.5135 56.2117 37.8827 0
M  V30 8072 C  105.7887 54.3657 38.3647 0
M  V30 8073 H  106.4085 53.7937 37.6743 0
M  V30 8074 H  105.3313 53.6451 39.0433 0
M  V30 8075 O  104.7698 55.0021 37.6162 0
M  V30 8076 H  104.2301 54.3280 37.1955 0
M  V30 8077 N  106.6361 57.5002 37.9146 0
M  V30 8078 H  105.6844 57.5815 38.2447 0
M  V30 8079 C  107.1626 58.6422 37.1724 0 CFG=2
M  V30 8080 H  107.8156 58.2559 36.3885 0
M  V30 8081 C  108.0038 59.5653 38.0700 0
M  V30 8082 O  109.0266 60.0630 37.6094 0
M  V30 8083 C  105.9907 59.3993 36.5013 0
M  V30 8084 H  105.4314 58.7122 35.8648 0
M  V30 8085 H  105.2913 59.7188 37.2753 0
M  V30 8086 C  106.3819 60.6413 35.6709 0
M  V30 8087 H  105.4706 61.1853 35.4203 0
M  V30 8088 H  106.9670 61.3308 36.2774 0
M  V30 8089 C  107.1395 60.3097 34.3701 0
M  V30 8090 H  107.8964 59.5487 34.5567 0
M  V30 8091 H  106.4419 59.8624 33.6609 0
M  V30 8092 C  107.8257 61.5149 33.7047 0
M  V30 8093 H  108.6755 61.8414 34.3038 0
M  V30 8094 H  108.2200 61.2223 32.7314 0
M  V30 8095 N  106.9174 62.6610 33.5287 0 CHG=1
M  V30 8096 H  106.0884 62.3789 33.0262 0
M  V30 8097 H  106.6684 63.0160 34.4445 0
M  V30 8098 H  107.3941 63.3928 33.0221 0
M  V30 8099 N  107.5629 59.7871 39.3193 0
M  V30 8100 H  106.7067 59.3461 39.6292 0
M  V30 8101 C  108.1783 60.7341 40.2517 0 CFG=2
M  V30 8102 H  108.3632 61.6444 39.6814 0
M  V30 8103 C  109.5494 60.2977 40.7886 0
M  V30 8104 O  110.3978 61.1649 40.9881 0
M  V30 8105 C  107.1867 61.0624 41.3852 0
M  V30 8106 H  106.8410 60.1331 41.8320 0
M  V30 8107 H  107.6885 61.6072 42.1849 0
M  V30 8108 C  105.9842 61.8987 40.9098 0
M  V30 8109 H  105.5799 61.4668 39.9950 0
M  V30 8110 H  105.1766 61.8391 41.6384 0
M  V30 8111 C  106.3447 63.3711 40.6634 0
M  V30 8112 H  106.3479 63.8836 41.6254 0
M  V30 8113 H  107.3599 63.4703 40.2842 0
M  V30 8114 C  105.3599 64.0778 39.7237 0
M  V30 8115 H  105.1973 63.4807 38.8255 0
M  V30 8116 H  104.3924 64.2107 40.2091 0
M  V30 8117 N  105.8908 65.3817 39.2984 0 CHG=1
M  V30 8118 H  106.0492 65.9568 40.1159 0
M  V30 8119 H  106.7733 65.2276 38.8177 0
M  V30 8120 H  105.2401 65.8352 38.6743 0
M  V30 8121 N  109.7719 58.9818 40.9542 0
M  V30 8122 H  109.0206 58.3205 40.8037 0
M  V30 8123 C  111.0895 58.4173 41.2626 0 CFG=2
M  V30 8124 H  111.5396 59.0550 42.0252 0
M  V30 8125 C  112.0421 58.4540 40.0516 0
M  V30 8126 O  113.2478 58.5604 40.2596 0
M  V30 8127 C  110.9374 57.0212 41.9154 0
M  V30 8128 H  111.8662 56.7480 42.4180 0
M  V30 8129 H  110.2122 57.1375 42.7222 0
M  V30 8130 C  110.4925 55.8498 41.0028 0
M  V30 8131 H  109.7746 56.2391 40.2820 0
M  V30 8132 C  111.6617 55.2369 40.1948 0
M  V30 8133 H  111.7669 54.1614 40.3361 0
M  V30 8134 H  111.5192 55.4021 39.1267 0
M  V30 8135 H  112.6224 55.6753 40.4649 0
M  V30 8136 C  109.7474 54.7770 41.8252 0
M  V30 8137 H  108.6716 54.8307 41.6709 0
M  V30 8138 H  110.0370 53.7681 41.5511 0
M  V30 8139 H  109.9231 54.8814 42.8959 0
M  V30 8140 N  111.4990 58.4155 38.8200 0
M  V30 8141 H  110.4968 58.3417 38.7191 0
M  V30 8142 C  112.2676 58.5854 37.5822 0 CFG=2
M  V30 8143 H  113.1834 57.9971 37.6709 0
M  V30 8144 C  112.6796 60.0573 37.3503 0
M  V30 8145 O  113.7761 60.2908 36.8452 0
M  V30 8146 C  111.4924 58.0687 36.3381 0 CFG=2
M  V30 8147 H  110.5420 58.5916 36.2492 0
M  V30 8148 O  111.1863 56.6994 36.5179 0
M  V30 8149 H  110.5144 56.6161 37.2013 0
M  V30 8150 C  112.2305 58.2032 34.9929 0
M  V30 8151 H  111.6766 57.7113 34.1927 0
M  V30 8152 H  112.3533 59.2451 34.6972 0
M  V30 8153 H  113.2205 57.7482 35.0387 0
M  V30 8154 N  111.8361 61.0145 37.7813 0
M  V30 8155 H  110.9381 60.7449 38.1603 0
M  V30 8156 C  112.1311 62.4521 37.8044 0 CFG=2
M  V30 8157 H  112.5375 62.7259 36.8288 0
M  V30 8158 C  113.2009 62.8341 38.8480 0
M  V30 8159 O  113.9395 63.7885 38.6108 0
M  V30 8160 C  110.8272 63.2533 38.0161 0
M  V30 8161 H  110.2963 62.8567 38.8819 0
M  V30 8162 H  111.0671 64.2882 38.2652 0
M  V30 8163 C  109.8952 63.2397 36.7835 0
M  V30 8164 H  110.3958 63.7266 35.9464 0
M  V30 8165 H  109.7033 62.2171 36.4661 0
M  V30 8166 C  108.5431 63.9329 36.9940 0
M  V30 8167 O  107.7262 63.8720 36.0495 0
M  V30 8168 O  108.3252 64.5116 38.0797 0 CHG=-1
M  V30 8169 N  113.3002 62.0668 39.9493 0
M  V30 8170 H  112.6382 61.3168 40.0908 0
M  V30 8171 C  114.3622 62.1912 40.9534 0 CFG=2
M  V30 8172 H  114.5399 63.2518 41.1315 0
M  V30 8173 C  115.6988 61.5851 40.4840 0
M  V30 8174 O  116.7442 62.0627 40.9204 0
M  V30 8175 C  113.9105 61.5379 42.2768 0
M  V30 8176 H  113.5472 60.5331 42.0605 0
M  V30 8177 H  114.7639 61.3985 42.9414 0
M  V30 8178 C  112.8222 62.3244 43.0377 0
M  V30 8179 H  112.0497 62.6214 42.3290 0
M  V30 8180 C  112.1425 61.4232 44.0825 0
M  V30 8181 H  111.7136 62.0012 44.8977 0
M  V30 8182 H  111.3248 60.8636 43.6304 0
M  V30 8183 H  112.8376 60.7010 44.5126 0
M  V30 8184 C  113.3686 63.6248 43.6676 0
M  V30 8185 H  112.8531 64.4984 43.2673 0
M  V30 8186 H  113.2476 63.6468 44.7505 0
M  V30 8187 H  114.4323 63.7593 43.4738 0
M  V30 8188 N  115.6527 60.5673 39.6044 0
M  V30 8189 H  114.7554 60.2076 39.3106 0
M  V30 8190 C  116.8302 59.9736 38.9573 0 CFG=2
M  V30 8191 H  117.6428 59.9402 39.6863 0
M  V30 8192 C  117.3310 60.8087 37.7642 0
M  V30 8193 O  118.5037 60.6866 37.4126 0
M  V30 8194 C  116.5164 58.5226 38.5311 0
M  V30 8195 H  115.5990 58.4956 37.9422 0
M  V30 8196 H  117.3078 58.1506 37.8784 0
M  V30 8197 C  116.4130 57.5664 39.7288 0
M  V30 8198 H  117.3373 57.5308 40.3067 0
M  V30 8199 H  115.6670 57.9899 40.3952 0
M  V30 8200 C  115.9147 56.1606 39.3754 0
M  V30 8201 H  114.8382 56.2287 39.2137 0
M  V30 8202 H  116.3496 55.7634 38.4580 0
M  V30 8203 N  116.0528 55.2721 40.5349 0
M  V30 8204 H  116.7166 55.5791 41.2355 0
M  V30 8205 C  115.5107 54.0567 40.6969 0
M  V30 8206 N  114.7515 53.4947 39.7488 0
M  V30 8207 H  114.3841 52.5557 39.9029 0
M  V30 8208 H  114.5612 53.9758 38.8831 0
M  V30 8209 N  115.7465 53.3891 41.8326 0 CHG=1
M  V30 8210 H  115.4200 52.4309 41.9360 0
M  V30 8211 H  116.2726 53.8130 42.5858 0
M  V30 8212 N  116.4602 61.6585 37.1905 0
M  V30 8213 H  115.5058 61.6812 37.5209 0
M  V30 8214 C  116.7919 62.6123 36.1308 0 CFG=2
M  V30 8215 H  117.4252 62.1044 35.4008 0
M  V30 8216 C  117.5666 63.8473 36.6333 0
M  V30 8217 O  118.1475 64.5521 35.8081 0
M  V30 8218 C  115.4967 63.0334 35.4197 0
M  V30 8219 H  115.7054 63.6894 34.5738 0
M  V30 8220 H  114.9611 62.1659 35.0328 0
M  V30 8221 H  114.8241 63.5663 36.0913 0
M  V30 8222 N  117.5778 64.0814 37.9593 0
M  V30 8223 H  117.0764 63.4538 38.5713 0
M  V30 8224 C  118.3514 65.1330 38.6216 0 CFG=2
M  V30 8225 H  118.1272 66.0768 38.1198 0
M  V30 8226 C  119.8658 64.8617 38.5173 0
M  V30 8227 O  120.3139 63.7685 38.8649 0
M  V30 8228 C  117.9537 65.2658 40.1277 0 CFG=2
M  V30 8229 H  117.9516 64.2621 40.5501 0
M  V30 8230 C  116.5201 65.8295 40.2684 0
M  V30 8231 H  116.5114 66.8803 39.9757 0
M  V30 8232 H  115.8489 65.3268 39.5736 0
M  V30 8233 C  118.9299 66.0960 40.9918 0
M  V30 8234 H  118.5601 66.2376 42.0067 0
M  V30 8235 H  119.9043 65.6190 41.0960 0
M  V30 8236 H  119.0805 67.0789 40.5492 0
M  V30 8237 C  115.9311 65.6947 41.6808 0
M  V30 8238 H  114.8420 65.6912 41.6478 0
M  V30 8239 H  116.2518 64.7711 42.1627 0
M  V30 8240 H  116.2350 66.5242 42.3181 0
M  V30 8241 N  120.6150 65.8872 38.0810 0
M  V30 8242 H  120.1650 66.7492 37.8082 0
M  V30 8243 C  122.0779 65.9237 38.0831 0 CFG=2
M  V30 8244 H  122.4476 65.0200 37.6034 0
M  V30 8245 C  122.5777 66.0903 39.5456 0
M  V30 8246 O  122.2162 67.0856 40.1782 0
M  V30 8247 C  122.5754 67.1328 37.2379 0 CFG=2
M  V30 8248 H  123.6647 67.1657 37.2959 0
M  V30 8249 O  122.1057 68.3835 37.7128 0
M  V30 8250 H  122.3591 68.4642 38.6368 0
M  V30 8251 C  122.1929 67.0190 35.7538 0
M  V30 8252 H  122.6009 67.8509 35.1789 0
M  V30 8253 H  122.5830 66.0982 35.3194 0
M  V30 8254 H  121.1115 67.0202 35.6130 0
M  V30 8255 N  123.3415 65.1105 40.0927 0
M  V30 8256 C  123.8128 65.1754 41.4929 0 CFG=2
M  V30 8257 H  122.9157 65.0966 42.1051 0
M  V30 8258 C  124.6846 66.4158 41.8186 0
M  V30 8259 O  125.5260 66.7768 40.9933 0
M  V30 8260 C  124.6414 63.8874 41.6607 0
M  V30 8261 H  125.6980 64.0674 41.4521 0
M  V30 8262 H  124.5761 63.4816 42.6707 0
M  V30 8263 C  124.0918 62.9279 40.6245 0
M  V30 8264 H  124.7887 62.1346 40.3529 0
M  V30 8265 H  123.1843 62.4612 41.0082 0
M  V30 8266 C  123.7319 63.8449 39.4652 0
M  V30 8267 H  124.5974 64.0225 38.8255 0
M  V30 8268 H  122.9481 63.3795 38.8690 0
M  V30 8269 N  124.5098 67.0042 43.0275 0
M  V30 8270 C  125.4639 67.9520 43.6464 0 CFG=2
M  V30 8271 H  125.3495 68.9071 43.1304 0
M  V30 8272 C  126.9422 67.5174 43.6283 0
M  V30 8273 O  127.2340 66.3214 43.6424 0
M  V30 8274 C  124.9569 68.0747 45.0920 0
M  V30 8275 H  125.3993 67.3102 45.7293 0
M  V30 8276 H  125.1976 69.0388 45.5390 0
M  V30 8277 C  123.4637 67.8365 44.9941 0
M  V30 8278 H  123.0145 67.5115 45.9313 0
M  V30 8279 H  122.9731 68.7587 44.6908 0
M  V30 8280 C  123.3367 66.8107 43.8788 0
M  V30 8281 H  123.3419 65.7992 44.2803 0
M  V30 8282 H  122.4028 66.9539 43.3327 0
M  V30 8283 N  127.8429 68.5122 43.5928 0
M  V30 8284 H  127.5177 69.4679 43.6018 0
M  V30 8285 C  129.2959 68.3317 43.5283 0 CFG=2
M  V30 8286 H  129.5082 67.7814 42.6093 0
M  V30 8287 C  129.8624 67.5331 44.7177 0
M  V30 8288 O  129.5965 67.8812 45.8683 0
M  V30 8289 C  129.9785 69.7122 43.4365 0
M  V30 8290 H  129.6936 70.3253 44.2934 0
M  V30 8291 H  131.0597 69.5800 43.5060 0
M  V30 8292 C  129.6744 70.4685 42.1317 0
M  V30 8293 H  129.9501 69.8462 41.2793 0
M  V30 8294 H  128.6015 70.6455 42.0478 0
M  V30 8295 C  130.4165 71.8106 42.0478 0
M  V30 8296 H  130.1387 72.4296 42.9022 0
M  V30 8297 H  131.4900 71.6355 42.1332 0
M  V30 8298 C  130.1217 72.5687 40.7461 0
M  V30 8299 H  130.4094 71.9666 39.8835 0
M  V30 8300 H  129.0534 72.7697 40.6581 0
M  V30 8301 N  130.8500 73.8478 40.6942 0 CHG=1
M  V30 8302 H  131.8438 73.6741 40.7456 0
M  V30 8303 H  130.6375 74.3228 39.8284 0
M  V30 8304 H  130.5703 74.4285 41.4721 0
M  V30 8305 N  130.6534 66.4955 44.3995 0
M  V30 8306 H  130.8044 66.2779 43.4250 0
M  V30 8307 C  131.3683 65.6650 45.3689 0
M  V30 8308 H  132.2549 65.2588 44.8815 0
M  V30 8309 H  131.7240 66.2709 46.2038 0
M  V30 8310 C  130.5342 64.4924 45.9135 0
M  V30 8311 O  131.0631 63.7384 46.7288 0
M  V30 8312 N  129.2685 64.3227 45.4876 0
M  V30 8313 H  128.8761 64.9625 44.8100 0
M  V30 8314 C  128.3855 63.2303 45.9125 0 CFG=2
M  V30 8315 H  128.9914 62.4074 46.2895 0
M  V30 8316 C  127.5923 62.6511 44.7294 0
M  V30 8317 O  127.4441 63.2986 43.6928 0
M  V30 8318 C  127.3765 63.6620 47.0294 0 CFG=2
M  V30 8319 H  126.7373 62.8067 47.2543 0
M  V30 8320 C  126.4442 64.8425 46.6621 0
M  V30 8321 H  126.0874 65.3161 47.5759 0
M  V30 8322 H  127.0099 65.6206 46.1525 0
M  V30 8323 C  128.1042 63.9528 48.3492 0
M  V30 8324 H  127.4115 64.2303 49.1434 0
M  V30 8325 H  128.6412 63.0731 48.6891 0
M  V30 8326 H  128.8213 64.7618 48.2403 0
M  V30 8327 C  125.1956 64.4576 45.8521 0
M  V30 8328 H  124.3236 65.0030 46.2129 0
M  V30 8329 H  125.3280 64.6944 44.7974 0
M  V30 8330 H  124.9600 63.3963 45.9254 0
M  V30 8331 N  127.0714 61.4359 44.9460 0
M  V30 8332 H  127.2731 60.9628 45.8185 0
M  V30 8333 C  126.0829 60.7687 44.1057 0 CFG=2
M  V30 8334 H  125.7773 61.4116 43.2782 0
M  V30 8335 C  124.8542 60.4591 44.9814 0
M  V30 8336 O  125.0119 60.0725 46.1417 0
M  V30 8337 C  126.6331 59.4299 43.5377 0 CFG=2
M  V30 8338 H  125.8567 58.9795 42.9172 0
M  V30 8339 O  126.9440 58.4808 44.5453 0
M  V30 8340 H  126.1620 58.3335 45.0839 0
M  V30 8341 C  127.8752 59.6201 42.6541 0
M  V30 8342 H  128.1906 58.6745 42.2122 0
M  V30 8343 H  127.6704 60.3138 41.8383 0
M  V30 8344 H  128.7177 60.0149 43.2230 0
M  V30 8345 N  123.6550 60.6296 44.4030 0
M  V30 8346 H  123.5936 60.9349 43.4426 0
M  V30 8347 C  122.3858 60.3227 45.0610 0 CFG=2
M  V30 8348 H  122.5509 60.2134 46.1318 0
M  V30 8349 C  121.8179 58.9954 44.5198 0
M  V30 8350 O  121.8344 58.7670 43.3091 0
M  V30 8351 C  121.3542 61.4768 44.8816 0
M  V30 8352 H  121.8606 62.3911 45.1962 0
M  V30 8353 C  120.8864 61.7169 43.4308 0
M  V30 8354 H  120.2851 62.6224 43.3591 0
M  V30 8355 H  121.7325 61.8396 42.7561 0
M  V30 8356 H  120.2718 60.8989 43.0545 0
M  V30 8357 C  120.1351 61.3168 45.8099 0
M  V30 8358 H  119.4716 62.1771 45.7316 0
M  V30 8359 H  119.5484 60.4306 45.5669 0
M  V30 8360 H  120.4411 61.2377 46.8535 0
M  V30 8361 N  121.3280 58.1526 45.4418 0
M  V30 8362 H  121.3927 58.3994 46.4215 0
M  V30 8363 C  120.6468 56.8945 45.1503 0 CFG=2
M  V30 8364 H  120.6897 56.6716 44.0839 0
M  V30 8365 C  119.1768 57.0626 45.5510 0
M  V30 8366 O  118.8941 57.3081 46.7245 0
M  V30 8367 C  121.2944 55.7290 45.9399 0
M  V30 8368 H  121.0997 55.8614 47.0037 0
M  V30 8369 H  120.7906 54.8006 45.6673 0
M  V30 8370 C  122.8201 55.5410 45.7654 0
M  V30 8371 H  123.2956 56.4357 46.1706 0
M  V30 8372 C  123.3212 54.3620 46.6287 0
M  V30 8373 H  124.1454 54.6757 47.2701 0
M  V30 8374 H  122.5403 53.9706 47.2822 0
M  V30 8375 H  123.6761 53.5218 46.0318 0
M  V30 8376 C  123.2720 55.4274 44.2924 0
M  V30 8377 H  123.9145 54.5656 44.1125 0
M  V30 8378 H  122.4351 55.3437 43.6029 0
M  V30 8379 H  123.8391 56.3113 43.9987 0
M  V30 8380 N  118.2688 56.9389 44.5717 0
M  V30 8381 H  118.5615 56.7242 43.6280 0
M  V30 8382 C  116.8302 57.0694 44.7901 0 CFG=2
M  V30 8383 H  116.6598 57.8161 45.5672 0
M  V30 8384 C  116.2484 55.7167 45.2404 0
M  V30 8385 O  116.4371 54.7083 44.5559 0
M  V30 8386 C  116.0903 57.5486 43.5120 0
M  V30 8387 H  116.2505 56.8143 42.7247 0
M  V30 8388 C  114.5624 57.6838 43.6911 0
M  V30 8389 H  114.0975 58.0951 42.7958 0
M  V30 8390 H  114.0815 56.7236 43.8795 0
M  V30 8391 H  114.3196 58.3478 44.5215 0
M  V30 8392 C  116.6752 58.8789 43.0058 0
M  V30 8393 H  116.0840 59.2892 42.1908 0
M  V30 8394 H  116.6992 59.6261 43.7944 0
M  V30 8395 H  117.6941 58.7569 42.6373 0
M  V30 8396 N  115.5601 55.7451 46.3896 0
M  V30 8397 H  115.4379 56.6323 46.8615 0
M  V30 8398 C  114.9306 54.5870 47.0091 0
M  V30 8399 H  114.8273 53.7590 46.3090 0
M  V30 8400 H  115.5457 54.2468 47.8423 0
M  V30 8401 C  113.5333 54.9709 47.4996 0
M  V30 8402 O  112.8884 55.8729 46.9604 0
M  V30 8403 N  113.0706 54.2400 48.5239 0
M  V30 8404 H  113.6541 53.5087 48.9042 0
M  V30 8405 C  111.7310 54.3531 49.0931 0
M  V30 8406 H  111.8094 54.3723 50.1805 0
M  V30 8407 H  111.2381 55.2737 48.7867 0
M  V30 8408 C  110.8804 53.1537 48.6603 0
M  V30 8409 O  111.2901 52.3470 47.8230 0
M  V30 8410 N  109.6796 53.0442 49.2524 0
M  V30 8411 H  109.3859 53.7464 49.9171 0
M  V30 8412 C  108.7506 51.9270 49.0419 0 CFG=2
M  V30 8413 H  109.3514 51.0360 49.2373 0
M  V30 8414 C  108.2043 51.7334 47.6024 0
M  V30 8415 O  108.0958 50.5753 47.1990 0
M  V30 8416 C  107.5837 51.8718 50.0802 0 CFG=2
M  V30 8417 H  107.3672 50.8131 50.2326 0
M  V30 8418 O  106.3496 52.4174 49.6467 0
M  V30 8419 H  106.0042 51.8726 48.9338 0
M  V30 8420 C  107.9318 52.4335 51.4676 0
M  V30 8421 H  107.1144 52.2749 52.1717 0
M  V30 8422 H  108.8183 51.9480 51.8766 0
M  V30 8423 H  108.1227 53.5057 51.4253 0
M  V30 8424 N  107.9582 52.8142 46.8175 0
M  V30 8425 C  107.6057 52.6687 45.3915 0 CFG=2
M  V30 8426 H  106.7944 51.9415 45.3109 0
M  V30 8427 C  108.7753 52.2295 44.4946 0
M  V30 8428 O  108.5380 51.5272 43.5145 0
M  V30 8429 C  107.0769 54.0546 44.9827 0
M  V30 8430 H  107.8399 54.6268 44.4513 0
M  V30 8431 H  106.2095 53.9820 44.3269 0
M  V30 8432 C  106.7518 54.7591 46.2890 0
M  V30 8433 H  106.7626 55.8446 46.2057 0
M  V30 8434 H  105.7605 54.4571 46.6306 0
M  V30 8435 C  107.8040 54.2087 47.2386 0
M  V30 8436 H  108.7526 54.7293 47.0999 0
M  V30 8437 H  107.4948 54.3373 48.2755 0
M  V30 8438 N  110.0068 52.6442 44.8436 0
M  V30 8439 H  110.1259 53.2100 45.6715 0
M  V30 8440 C  111.2287 52.3178 44.1074 0 CFG=2
M  V30 8441 H  111.0519 52.5209 43.0535 0
M  V30 8442 C  111.6281 50.8386 44.2140 0
M  V30 8443 O  112.1733 50.3097 43.2489 0
M  V30 8444 C  112.3613 53.2433 44.5648 0
M  V30 8445 H  113.2310 53.1527 43.9137 0
M  V30 8446 H  112.0528 54.2891 44.5439 0
M  V30 8447 H  112.6738 53.0052 45.5800 0
M  V30 8448 N  111.3078 50.1878 45.3471 0
M  V30 8449 H  110.8720 50.6993 46.1017 0
M  V30 8450 C  111.4760 48.7460 45.5600 0 CFG=2
M  V30 8451 H  112.5170 48.4914 45.3666 0
M  V30 8452 C  110.6282 47.9094 44.5857 0
M  V30 8453 O  111.1421 46.9409 44.0271 0
M  V30 8454 C  111.1415 48.3994 47.0277 0
M  V30 8455 H  110.1621 48.8184 47.2625 0
M  V30 8456 H  111.0340 47.3203 47.1478 0
M  V30 8457 C  112.1853 48.9035 48.0513 0
M  V30 8458 H  112.4106 49.9415 47.8067 0
M  V30 8459 C  111.6088 48.9172 49.4840 0
M  V30 8460 H  112.1660 48.2846 50.1747 0
M  V30 8461 H  111.6251 49.9280 49.8932 0
M  V30 8462 H  110.5732 48.5771 49.5143 0
M  V30 8463 C  113.5159 48.1239 47.9528 0
M  V30 8464 H  113.8218 47.6760 48.8978 0
M  V30 8465 H  113.4657 47.3148 47.2235 0
M  V30 8466 H  114.3240 48.7842 47.6421 0
M  V30 8467 N  109.3700 48.3292 44.3674 0
M  V30 8468 H  109.0280 49.1422 44.8604 0
M  V30 8469 C  108.4378 47.7223 43.4161 0 CFG=2
M  V30 8470 H  108.4202 46.6461 43.6003 0
M  V30 8471 C  108.8615 47.9467 41.9541 0
M  V30 8472 O  108.8073 47.0048 41.1657 0
M  V30 8473 C  107.0177 48.2767 43.6517 0
M  V30 8474 H  106.9981 49.3462 43.4371 0
M  V30 8475 H  106.3346 47.8185 42.9336 0
M  V30 8476 C  106.4818 48.0401 45.0762 0
M  V30 8477 H  106.4287 46.9717 45.2820 0
M  V30 8478 H  107.1562 48.4641 45.8198 0
M  V30 8479 C  105.0947 48.6519 45.2689 0
M  V30 8480 O  104.1647 48.1863 44.5738 0
M  V30 8481 O  104.9890 49.5751 46.1057 0 CHG=-1
M  V30 8482 N  109.2836 49.1814 41.6290 0
M  V30 8483 H  109.2903 49.9009 42.3399 0
M  V30 8484 C  109.6760 49.6070 40.2835 0 CFG=2
M  V30 8485 H  108.8847 49.2843 39.6042 0
M  V30 8486 C  110.9729 48.9489 39.7925 0
M  V30 8487 O  111.0176 48.5550 38.6297 0
M  V30 8488 C  109.7885 51.1500 40.2270 0
M  V30 8489 H  109.9675 51.5368 41.2284 0
M  V30 8490 H  110.6740 51.4477 39.6615 0
M  V30 8491 C  108.5813 51.8754 39.5919 0
M  V30 8492 H  108.8281 52.9362 39.6317 0
M  V30 8493 C  108.4314 51.5373 38.0923 0
M  V30 8494 H  108.4214 52.4463 37.4905 0
M  V30 8495 H  109.2583 50.9272 37.7268 0
M  V30 8496 H  107.5149 50.9899 37.8726 0
M  V30 8497 C  107.2688 51.7016 40.3875 0
M  V30 8498 H  106.4428 51.3541 39.7676 0
M  V30 8499 H  107.3662 50.9907 41.2054 0
M  V30 8500 H  106.9597 52.6486 40.8306 0
M  V30 8501 N  111.9882 48.8313 40.6661 0
M  V30 8502 H  111.9013 49.2123 41.5998 0
M  V30 8503 C  113.2699 48.1943 40.3373 0 CFG=2
M  V30 8504 H  113.5245 48.5122 39.3256 0
M  V30 8505 C  113.1867 46.6603 40.2934 0
M  V30 8506 O  113.9593 46.0499 39.5551 0
M  V30 8507 C  114.4559 48.6314 41.2218 0
M  V30 8508 H  114.3118 48.2337 42.2279 0
M  V30 8509 H  115.3569 48.1881 40.7990 0
M  V30 8510 C  114.6974 50.1411 41.3327 0
M  V30 8511 O  114.0996 50.9075 40.5466 0
M  V30 8512 O  115.5446 50.5109 42.1763 0 CHG=-1
M  V30 8513 N  112.2284 46.0696 41.0298 0
M  V30 8514 H  111.6444 46.6349 41.6304 0
M  V30 8515 C  111.8633 44.6584 40.9120 0 CFG=2
M  V30 8516 H  112.7815 44.0732 40.9963 0
M  V30 8517 C  111.2423 44.3622 39.5338 0
M  V30 8518 O  111.6978 43.4375 38.8642 0
M  V30 8519 C  110.9481 44.2656 42.0889 0
M  V30 8520 H  111.4733 44.4474 43.0244 0
M  V30 8521 H  110.0451 44.8750 42.1071 0
M  V30 8522 O  110.5710 42.9037 42.0508 0
M  V30 8523 H  110.0635 42.6981 42.8414 0
M  V30 8524 N  110.2772 45.2002 39.1122 0
M  V30 8525 H  109.9641 45.9376 39.7298 0
M  V30 8526 C  109.6487 45.1775 37.7870 0 CFG=2
M  V30 8527 H  109.2568 44.1701 37.6375 0
M  V30 8528 C  110.6473 45.4462 36.6364 0
M  V30 8529 O  110.5302 44.8096 35.5922 0
M  V30 8530 C  108.4435 46.1711 37.7230 0 CFG=2
M  V30 8531 H  108.7853 47.1122 38.1550 0
M  V30 8532 C  107.2774 45.6610 38.6033 0
M  V30 8533 H  106.7625 44.8503 38.0864 0
M  V30 8534 H  107.6598 45.2207 39.5238 0
M  V30 8535 C  107.9085 46.4996 36.3098 0
M  V30 8536 H  107.0621 47.1844 36.3569 0
M  V30 8537 H  108.6545 46.9847 35.6805 0
M  V30 8538 H  107.5683 45.5973 35.8021 0
M  V30 8539 C  106.2577 46.7428 38.9906 0
M  V30 8540 H  106.7395 47.6999 39.1922 0
M  V30 8541 H  105.5220 46.8964 38.2014 0
M  V30 8542 H  105.7157 46.4540 39.8912 0
M  V30 8543 N  111.6352 46.3322 36.8533 0
M  V30 8544 H  111.6573 46.8444 37.7253 0
M  V30 8545 C  112.7097 46.6286 35.9000 0 CFG=2
M  V30 8546 H  112.2331 46.8462 34.9419 0
M  V30 8547 C  113.6657 45.4365 35.7020 0
M  V30 8548 O  114.0201 45.1439 34.5613 0
M  V30 8549 C  113.4666 47.8923 36.3576 0
M  V30 8550 H  112.7506 48.6726 36.6160 0
M  V30 8551 H  114.0260 47.6758 37.2673 0
M  V30 8552 C  114.4248 48.5004 35.3590 0
M  V30 8553 N  115.3668 49.4457 35.7268 0
M  V30 8554 H  115.5169 49.8125 36.6558 0
M  V30 8555 C  114.5983 48.3188 34.0025 0
M  V30 8556 H  114.0640 47.6680 33.3258 0
M  V30 8557 C  116.0459 49.7785 34.6259 0
M  V30 8558 H  116.8499 50.5000 34.6175 0
M  V30 8559 N  115.6339 49.1342 33.5411 0
M  V30 8560 N  114.0183 44.7447 36.8017 0
M  V30 8561 H  113.6937 45.0617 37.7060 0
M  V30 8562 C  114.8439 43.5338 36.7942 0
M  V30 8563 H  115.7740 43.7199 36.2550 0
M  V30 8564 H  115.1127 43.2880 37.8220 0
M  V30 8565 C  114.1097 42.3329 36.1709 0
M  V30 8566 O  114.7660 41.4120 35.6851 0
M  V30 8567 N  112.7647 42.3589 36.1542 0
M  V30 8568 H  112.2856 43.1335 36.5922 0
M  V30 8569 C  111.9156 41.3866 35.4729 0 CFG=2
M  V30 8570 H  112.3628 40.4003 35.5960 0
M  V30 8571 C  111.8585 41.6627 33.9652 0
M  V30 8572 O  112.2286 40.7753 33.2067 0
M  V30 8573 C  110.5178 41.3494 36.1228 0
M  V30 8574 H  110.1470 42.3668 36.2327 0
M  V30 8575 H  109.8003 40.8487 35.4704 0
M  V30 8576 C  110.5274 40.6532 37.4986 0
M  V30 8577 H  111.3986 40.9915 38.0579 0
M  V30 8578 C  109.3017 41.0537 38.3311 0
M  V30 8579 H  109.1232 40.3546 39.1454 0
M  V30 8580 H  109.4421 42.0298 38.7922 0
M  V30 8581 H  108.4038 41.1069 37.7159 0
M  V30 8582 C  110.6556 39.1244 37.3589 0
M  V30 8583 H  109.9516 38.5855 37.9867 0
M  V30 8584 H  110.4900 38.7879 36.3356 0
M  V30 8585 H  111.6518 38.7974 37.6487 0
M  V30 8586 N  111.4583 42.8757 33.5429 0
M  V30 8587 H  111.1788 43.5756 34.2191 0
M  V30 8588 C  111.3821 43.2668 32.1259 0 CFG=2
M  V30 8589 H  110.7788 42.5010 31.6333 0
M  V30 8590 C  112.7127 43.2563 31.3452 0
M  V30 8591 O  112.6769 43.0895 30.1264 0
M  V30 8592 C  110.6333 44.6081 31.9655 0
M  V30 8593 H  110.8706 45.2798 32.7922 0
M  V30 8594 H  110.9688 45.1258 31.0651 0
M  V30 8595 C  109.1263 44.4614 31.8464 0
M  V30 8596 C  108.5541 44.0973 30.6084 0
M  V30 8597 H  109.1771 43.9956 29.7316 0
M  V30 8598 C  108.2994 44.5200 32.9868 0
M  V30 8599 H  108.7182 44.7506 33.9510 0
M  V30 8600 C  107.1874 43.8700 30.5129 0
M  V30 8601 H  106.7518 43.6042 29.5610 0
M  V30 8602 C  106.9348 44.2948 32.8713 0
M  V30 8603 H  106.3049 44.3642 33.7450 0
M  V30 8604 C  106.3802 43.9751 31.6387 0
M  V30 8605 H  105.3181 43.7971 31.5575 0
M  V30 8606 N  113.8512 43.3857 32.0474 0
M  V30 8607 H  113.8025 43.5538 33.0435 0
M  V30 8608 C  115.1979 43.2565 31.4833 0 CFG=2
M  V30 8609 H  115.2385 43.8282 30.5542 0
M  V30 8610 C  115.6090 41.8060 31.1518 0
M  V30 8611 O  116.5843 41.6223 30.4241 0
M  V30 8612 C  116.1992 43.8784 32.4695 0
M  V30 8613 H  117.2225 43.8070 32.0993 0
M  V30 8614 H  115.9868 44.9365 32.6263 0
M  V30 8615 H  116.1617 43.3846 33.4419 0
M  V30 8616 N  114.8866 40.8156 31.7026 0
M  V30 8617 H  114.1014 41.0558 32.2927 0
M  V30 8618 C  115.2069 39.3884 31.6233 0 CFG=2
M  V30 8619 H  116.0739 39.2223 30.9826 0
M  V30 8620 C  114.0630 38.5485 31.0264 0
M  V30 8621 O  114.3263 37.4226 30.6080 0
M  V30 8622 C  115.5236 38.8874 33.0487 0
M  V30 8623 H  114.6554 39.0873 33.6721 0
M  V30 8624 H  115.6548 37.8042 33.0492 0
M  V30 8625 C  116.7459 39.5296 33.7285 0
M  V30 8626 H  116.6230 40.6119 33.7739 0
M  V30 8627 H  116.7713 39.1999 34.7672 0
M  V30 8628 C  118.0844 39.1940 33.0556 0
M  V30 8629 H  118.1813 38.1129 32.9539 0
M  V30 8630 H  118.0995 39.6025 32.0448 0
M  V30 8631 C  119.2788 39.7502 33.8406 0
M  V30 8632 H  119.2038 40.8349 33.9252 0
M  V30 8633 H  119.2875 39.3467 34.8539 0
M  V30 8634 N  120.5531 39.4112 33.1862 0 CHG=1
M  V30 8635 H  120.5689 39.8020 32.2548 0
M  V30 8636 H  121.3193 39.7921 33.7231 0
M  V30 8637 H  120.6478 38.4071 33.1319 0
M  V30 8638 N  112.8256 39.0773 31.0097 0
M  V30 8639 H  112.6786 39.9993 31.3975 0
M  V30 8640 C  111.6171 38.3649 30.5870 0 CFG=2
M  V30 8641 H  111.6582 37.4150 31.1178 0
M  V30 8642 C  111.5302 37.9980 29.0875 0
M  V30 8643 O  111.0503 36.8998 28.8066 0
M  V30 8644 C  110.3501 39.0633 31.1309 0
M  V30 8645 H  110.4667 39.2286 32.1990 0
M  V30 8646 H  110.2574 40.0563 30.6909 0
M  V30 8647 C  109.0371 38.2921 30.9067 0
M  V30 8648 H  108.7725 38.3108 29.8491 0
M  V30 8649 H  109.1666 37.2422 31.1728 0
M  V30 8650 S  107.6152 38.9352 31.8343 0
M  V30 8651 C  108.0382 38.4080 33.5185 0
M  V30 8652 H  107.2160 38.6320 34.1984 0
M  V30 8653 H  108.2231 37.3346 33.5450 0
M  V30 8654 H  108.9278 38.9232 33.8797 0
M  V30 8655 N  112.0719 38.8274 28.1598 0
M  V30 8656 C  112.2498 38.4189 26.7531 0 CFG=2
M  V30 8657 H  111.2651 38.1660 26.3547 0
M  V30 8658 C  113.1997 37.2231 26.5651 0
M  V30 8659 O  112.8811 36.3325 25.7807 0
M  V30 8660 C  112.7667 39.6885 26.0517 0
M  V30 8661 H  113.8577 39.7001 26.0176 0
M  V30 8662 H  112.4069 39.7769 25.0262 0
M  V30 8663 C  112.2857 40.8317 26.9288 0
M  V30 8664 H  112.8570 41.7515 26.7999 0
M  V30 8665 H  111.2403 41.0485 26.7042 0
M  V30 8666 C  112.3930 40.2460 28.3284 0
M  V30 8667 H  113.4161 40.3443 28.6938 0
M  V30 8668 H  111.7263 40.7609 29.0198 0
M  V30 8669 N  114.3184 37.2081 27.3129 0
M  V30 8670 H  114.5016 37.9714 27.9482 0
M  V30 8671 C  115.3102 36.1311 27.2985 0 CFG=2
M  V30 8672 H  115.5189 35.9105 26.2508 0
M  V30 8673 C  114.7898 34.8330 27.9475 0
M  V30 8674 O  115.1248 33.7553 27.4608 0
M  V30 8675 C  116.6142 36.6362 27.9587 0
M  V30 8676 H  116.8662 37.6186 27.5561 0
M  V30 8677 H  116.4273 36.7928 29.0222 0
M  V30 8678 C  117.8417 35.7099 27.7883 0
M  V30 8679 H  117.5693 34.7241 28.1597 0
M  V30 8680 C  118.2432 35.5268 26.3089 0
M  V30 8681 H  119.3200 35.5894 26.1531 0
M  V30 8682 H  117.9274 34.5479 25.9457 0
M  V30 8683 H  117.7833 36.2759 25.6640 0
M  V30 8684 C  119.0206 36.1837 28.6651 0
M  V30 8685 H  119.3813 35.3723 29.2979 0
M  V30 8686 H  119.8675 36.5365 28.0768 0
M  V30 8687 H  118.7361 37.0020 29.3273 0
M  V30 8688 N  113.9591 34.9589 28.9987 0
M  V30 8689 H  113.7614 35.8846 29.3548 0
M  V30 8690 C  113.2658 33.8569 29.6720 0 CFG=2
M  V30 8691 H  114.0160 33.1188 29.9576 0
M  V30 8692 C  112.2814 33.1290 28.7433 0
M  V30 8693 O  112.2946 31.9001 28.7170 0
M  V30 8694 C  112.6149 34.3799 30.9761 0
M  V30 8695 H  113.3976 34.6551 31.6840 0
M  V30 8696 H  112.0973 35.3083 30.7496 0
M  V30 8697 C  111.6037 33.4447 31.6709 0
M  V30 8698 H  111.8446 32.4019 31.4665 0
M  V30 8699 H  111.6958 33.5606 32.7501 0
M  V30 8700 S  109.8604 33.7412 31.2576 0
M  V30 8701 C  109.1219 32.2702 32.0113 0
M  V30 8702 H  108.0364 32.3035 31.9226 0
M  V30 8703 H  109.4823 31.3671 31.5184 0
M  V30 8704 H  109.3803 32.2149 33.0678 0
M  V30 8705 N  111.4821 33.9013 27.9871 0
M  V30 8706 H  111.5290 34.9066 28.0864 0
M  V30 8707 C  110.5297 33.4016 26.9942 0 CFG=2
M  V30 8708 H  109.9336 32.6257 27.4786 0
M  V30 8709 C  111.2244 32.7509 25.7788 0
M  V30 8710 O  110.7399 31.7238 25.3068 0
M  V30 8711 C  109.5600 34.5326 26.5344 0
M  V30 8712 H  110.1579 35.4256 26.3436 0
M  V30 8713 C  108.7600 34.2529 25.2432 0
M  V30 8714 H  108.0267 35.0383 25.0587 0
M  V30 8715 H  109.4023 34.2172 24.3631 0
M  V30 8716 H  108.2202 33.3074 25.3085 0
M  V30 8717 C  108.5780 34.8897 27.6662 0
M  V30 8718 H  107.9482 35.7362 27.3918 0
M  V30 8719 H  107.9224 34.0498 27.8985 0
M  V30 8720 H  109.0976 35.1596 28.5846 0
M  V30 8721 N  112.3551 33.3247 25.3272 0
M  V30 8722 H  112.6815 34.1808 25.7554 0
M  V30 8723 C  113.1944 32.7811 24.2548 0 CFG=2
M  V30 8724 H  112.5377 32.5753 23.4082 0
M  V30 8725 C  113.8532 31.4421 24.6400 0
M  V30 8726 O  113.7478 30.4916 23.8673 0
M  V30 8727 C  114.2627 33.8134 23.7800 0
M  V30 8728 H  114.6530 34.3144 24.6664 0
M  V30 8729 C  115.4832 33.2395 23.0253 0
M  V30 8730 H  116.1164 34.0401 22.6420 0
M  V30 8731 H  116.1154 32.6280 23.6699 0
M  V30 8732 H  115.1737 32.6298 22.1755 0
M  V30 8733 C  113.6016 34.8976 22.9098 0
M  V30 8734 H  114.2998 35.7044 22.6854 0
M  V30 8735 H  113.2566 34.4839 21.9617 0
M  V30 8736 H  112.7366 35.3414 23.4010 0
M  V30 8737 N  114.4729 31.3716 25.8322 0
M  V30 8738 H  114.5290 32.1955 26.4178 0
M  V30 8739 C  115.0660 30.1460 26.3809 0 CFG=2
M  V30 8740 H  115.7541 29.7651 25.6229 0
M  V30 8741 C  114.0240 29.0351 26.6174 0
M  V30 8742 O  114.3163 27.8787 26.3220 0
M  V30 8743 C  115.8935 30.4278 27.6761 0 CFG=2
M  V30 8744 H  115.3149 31.1227 28.2874 0
M  V30 8745 C  117.2145 31.1377 27.2920 0
M  V30 8746 H  117.8427 30.4455 26.7299 0
M  V30 8747 H  117.0119 31.9659 26.6121 0
M  V30 8748 C  116.1917 29.1949 28.5670 0
M  V30 8749 H  116.8078 29.4585 29.4261 0
M  V30 8750 H  115.2844 28.7520 28.9790 0
M  V30 8751 H  116.7208 28.4220 28.0085 0
M  V30 8752 C  118.0186 31.6780 28.4827 0
M  V30 8753 H  118.5769 32.5716 28.2047 0
M  V30 8754 H  117.3701 31.9359 29.3176 0
M  V30 8755 H  118.7383 30.9397 28.8370 0
M  V30 8756 N  112.8209 29.4141 27.0796 0
M  V30 8757 H  112.6658 30.3859 27.3128 0
M  V30 8758 C  111.6641 28.5337 27.2248 0 CFG=2
M  V30 8759 H  111.9870 27.6862 27.8326 0
M  V30 8760 C  111.2054 27.9430 25.8775 0
M  V30 8761 O  111.1941 26.7219 25.7476 0
M  V30 8762 C  110.5692 29.2692 28.0441 0
M  V30 8763 H  110.9471 29.3158 29.0662 0
M  V30 8764 H  110.5005 30.3087 27.7276 0
M  V30 8765 C  109.1401 28.6651 28.0467 0
M  V30 8766 H  109.2395 27.5804 27.9790 0
M  V30 8767 C  108.3998 28.9369 29.3740 0
M  V30 8768 H  107.8480 28.0508 29.6870 0
M  V30 8769 H  109.0736 29.1977 30.1894 0
M  V30 8770 H  107.6798 29.7516 29.2921 0
M  V30 8771 C  108.2975 29.1508 26.8471 0
M  V30 8772 H  107.2767 29.4112 27.1269 0
M  V30 8773 H  108.7260 30.0295 26.3660 0
M  V30 8774 H  108.2296 28.3719 26.0896 0
M  V30 8775 N  110.8507 28.7963 24.9007 0
M  V30 8776 H  110.9055 29.7951 25.0576 0
M  V30 8777 C  110.2028 28.3657 23.6568 0 CFG=2
M  V30 8778 H  109.4286 27.6570 23.9588 0
M  V30 8779 C  111.1254 27.5896 22.6979 0
M  V30 8780 O  110.6532 26.6332 22.0869 0
M  V30 8781 C  109.4350 29.5509 23.0147 0
M  V30 8782 H  108.6146 29.1604 22.4108 0
M  V30 8783 H  108.9389 30.0766 23.8313 0
M  V30 8784 C  110.2461 30.5593 22.1573 0
M  V30 8785 H  111.2253 30.6612 22.6256 0
M  V30 8786 C  110.4670 30.0651 20.7072 0
M  V30 8787 H  110.1338 30.7783 19.9540 0
M  V30 8788 H  111.5232 29.8834 20.5166 0
M  V30 8789 H  109.9423 29.1311 20.5055 0
M  V30 8790 C  109.6115 31.9702 22.1861 0
M  V30 8791 H  110.3424 32.7145 22.5013 0
M  V30 8792 H  109.2328 32.2891 21.2156 0
M  V30 8793 H  108.7736 32.0404 22.8794 0
M  V30 8794 N  112.4090 27.9799 22.5919 0
M  V30 8795 H  112.7446 28.7691 23.1276 0
M  V30 8796 C  113.3703 27.3349 21.6894 0 CFG=2
M  V30 8797 H  112.8867 27.2267 20.7160 0
M  V30 8798 C  113.7836 25.9247 22.1609 0
M  V30 8799 O  113.8069 25.0168 21.3302 0
M  V30 8800 C  114.6605 28.1760 21.4786 0 CFG=2
M  V30 8801 H  115.3372 27.6158 20.8308 0
M  V30 8802 O  115.3671 28.4003 22.6863 0
M  V30 8803 H  114.9130 29.0913 23.1799 0
M  V30 8804 C  114.4013 29.5280 20.7957 0
M  V30 8805 H  115.3281 30.0890 20.6716 0
M  V30 8806 H  113.9728 29.3830 19.8038 0
M  V30 8807 H  113.7116 30.1530 21.3597 0
M  V30 8808 N  114.0745 25.7511 23.4626 0
M  V30 8809 H  114.0320 26.5343 24.0993 0
M  V30 8810 C  114.5429 24.4768 24.0150 0 CFG=2
M  V30 8811 H  115.2710 24.0573 23.3171 0
M  V30 8812 C  113.4147 23.4376 24.1774 0
M  V30 8813 O  113.6878 22.2543 23.9813 0
M  V30 8814 C  115.2629 24.6509 25.3782 0 CFG=2
M  V30 8815 H  115.6436 23.6765 25.6892 0
M  V30 8816 O  114.3884 25.0720 26.4071 0
M  V30 8817 H  114.2848 26.0290 26.3561 0
M  V30 8818 C  116.4659 25.6055 25.3086 0
M  V30 8819 H  116.9467 25.7029 26.2824 0
M  V30 8820 H  117.2146 25.2328 24.6093 0
M  V30 8821 H  116.1819 26.6046 24.9791 0
M  V30 8822 N  112.1766 23.8759 24.4736 0
M  V30 8823 H  112.0123 24.8603 24.6320 0
M  V30 8824 C  111.0126 22.9884 24.5651 0 CFG=2
M  V30 8825 H  111.3051 22.1383 25.1834 0
M  V30 8826 C  110.5769 22.4400 23.1908 0
M  V30 8827 O  110.2474 21.2586 23.1238 0
M  V30 8828 C  109.7868 23.6671 25.2317 0 CFG=2
M  V30 8829 H  108.9275 22.9978 25.1777 0
M  V30 8830 O  109.3908 24.8398 24.5461 0
M  V30 8831 H  109.9708 25.5581 24.8194 0
M  V30 8832 C  110.0193 23.9935 26.7161 0
M  V30 8833 H  109.2155 24.6169 27.1062 0
M  V30 8834 H  110.0478 23.0840 27.3145 0
M  V30 8835 H  110.9615 24.5107 26.8900 0
M  V30 8836 N  110.6408 23.2561 22.1218 0
M  V30 8837 H  110.9083 24.2229 22.2472 0
M  V30 8838 C  110.3476 22.8350 20.7446 0 CFG=2
M  V30 8839 H  109.3737 22.3413 20.7645 0
M  V30 8840 C  111.3531 21.7958 20.1997 0
M  V30 8841 O  110.9372 20.8861 19.4814 0
M  V30 8842 C  110.2354 24.0624 19.7859 0 CFG=2
M  V30 8843 H  111.0599 24.7349 20.0296 0
M  V30 8844 C  108.9184 24.8230 20.0668 0
M  V30 8845 H  108.0818 24.2371 19.6849 0
M  V30 8846 H  108.7489 24.9033 21.1412 0
M  V30 8847 C  110.3413 23.7548 18.2723 0
M  V30 8848 H  110.1943 24.6525 17.6721 0
M  V30 8849 H  111.3215 23.3649 17.9972 0
M  V30 8850 H  109.5893 23.0287 17.9626 0
M  V30 8851 C  108.8623 26.2371 19.4669 0
M  V30 8852 H  108.3636 26.9256 20.1496 0
M  V30 8853 H  109.8571 26.6387 19.2719 0
M  V30 8854 H  108.3085 26.2425 18.5279 0
M  V30 8855 N  112.6345 21.9203 20.5898 0
M  V30 8856 H  112.8983 22.7024 21.1732 0
M  V30 8857 C  113.6981 20.9589 20.2840 0 CFG=2
M  V30 8858 H  113.6599 20.7627 19.2105 0
M  V30 8859 C  113.4986 19.6049 21.0004 0
M  V30 8860 O  113.6915 18.5672 20.3675 0
M  V30 8861 C  115.1009 21.5552 20.6133 0
M  V30 8862 H  115.0294 22.0569 21.5793 0
M  V30 8863 C  116.2610 20.5416 20.7280 0
M  V30 8864 H  117.2162 21.0533 20.8489 0
M  V30 8865 H  116.1497 19.8866 21.5926 0
M  V30 8866 H  116.3324 19.9181 19.8360 0
M  V30 8867 C  115.4765 22.6360 19.5834 0
M  V30 8868 H  116.3969 23.1481 19.8652 0
M  V30 8869 H  115.6273 22.2020 18.5945 0
M  V30 8870 H  114.6995 23.3936 19.4897 0
M  V30 8871 N  113.0766 19.6364 22.2779 0
M  V30 8872 H  112.9476 20.5287 22.7360 0
M  V30 8873 C  112.7473 18.4483 23.0748 0 CFG=2
M  V30 8874 H  113.5892 17.7575 23.0030 0
M  V30 8875 C  111.5119 17.6991 22.5451 0
M  V30 8876 O  111.5198 16.4685 22.5498 0
M  V30 8877 C  112.5521 18.8494 24.5542 0
M  V30 8878 H  111.8716 19.7008 24.5934 0
M  V30 8879 H  112.0501 18.0513 25.1047 0
M  V30 8880 C  113.8676 19.1968 25.2865 0
M  V30 8881 H  114.4316 19.8771 24.6488 0
M  V30 8882 C  113.5923 19.9640 26.5972 0
M  V30 8883 H  113.9508 19.4385 27.4813 0
M  V30 8884 H  114.0828 20.9376 26.5808 0
M  V30 8885 H  112.5293 20.1477 26.7508 0
M  V30 8886 C  114.7594 17.9542 25.4997 0
M  V30 8887 H  115.1249 17.8637 26.5222 0
M  V30 8888 H  114.2330 17.0281 25.2667 0
M  V30 8889 H  115.6367 17.9973 24.8536 0
M  V30 8890 N  110.4983 18.4456 22.0697 0
M  V30 8891 H  110.5596 19.4540 22.1280 0
M  V30 8892 C  109.3007 17.9110 21.4167 0 CFG=2
M  V30 8893 H  108.8771 17.1394 22.0622 0
M  V30 8894 C  109.6245 17.2472 20.0690 0
M  V30 8895 O  109.1021 16.1662 19.8121 0
M  V30 8896 C  108.2459 19.0235 21.2502 0
M  V30 8897 H  108.6770 19.8674 20.7109 0
M  V30 8898 H  107.4270 18.6580 20.6298 0
M  V30 8899 C  107.6414 19.5077 22.5760 0
M  V30 8900 H  106.8877 18.7994 22.9190 0
M  V30 8901 H  108.3999 19.5304 23.3554 0
M  V30 8902 S  106.8970 21.1576 22.4829 0
M  V30 8903 C  105.2115 20.7154 22.0018 0
M  V30 8904 H  104.6311 21.6188 21.8153 0
M  V30 8905 H  105.2137 20.1001 21.1057 0
M  V30 8906 H  104.7266 20.1491 22.7945 0
M  V30 8907 N  110.5042 17.8707 19.2625 0
M  V30 8908 H  110.8792 18.7673 19.5439 0
M  V30 8909 C  111.0029 17.3419 17.9876 0 CFG=2
M  V30 8910 H  110.1241 17.1711 17.3647 0
M  V30 8911 C  111.6931 15.9689 18.0981 0
M  V30 8912 O  111.4384 15.0985 17.2658 0
M  V30 8913 C  111.8554 18.4182 17.2649 0
M  V30 8914 H  111.1847 19.1595 16.8297 0
M  V30 8915 H  112.4565 18.9649 17.9912 0
M  V30 8916 C  112.7842 17.9384 16.1571 0
M  V30 8917 C  112.2618 17.5638 14.9015 0
M  V30 8918 H  111.2118 17.6899 14.6948 0
M  V30 8919 C  114.1529 17.7137 16.4212 0
M  V30 8920 H  114.5660 17.9565 17.3894 0
M  V30 8921 C  113.0956 17.0227 13.9319 0
M  V30 8922 H  112.6915 16.7376 12.9720 0
M  V30 8923 C  114.9729 17.1800 15.4353 0
M  V30 8924 H  116.0219 17.0221 15.6367 0
M  V30 8925 C  114.4466 16.8380 14.1957 0
M  V30 8926 H  115.0880 16.4181 13.4354 0
M  V30 8927 N  112.5248 15.8046 19.1392 0
M  V30 8928 H  112.6833 16.5794 19.7694 0
M  V30 8929 C  113.2474 14.5696 19.4453 0 CFG=2
M  V30 8930 H  113.6655 14.1805 18.5153 0
M  V30 8931 C  112.3354 13.4710 20.0254 0
M  V30 8932 O  112.5453 12.2990 19.7112 0
M  V30 8933 C  114.4026 14.8949 20.4188 0
M  V30 8934 H  113.9832 15.4072 21.2870 0
M  V30 8935 H  114.8416 13.9726 20.8033 0
M  V30 8936 C  115.5297 15.7596 19.8055 0
M  V30 8937 H  115.0649 16.6248 19.3349 0
M  V30 8938 C  116.4596 16.3239 20.9016 0
M  V30 8939 H  116.4994 17.4122 20.8483 0
M  V30 8940 H  116.1149 16.0688 21.9042 0
M  V30 8941 H  117.4832 15.9591 20.8203 0
M  V30 8942 C  116.3020 15.0165 18.6935 0
M  V30 8943 H  117.3833 15.0889 18.8070 0
M  V30 8944 H  116.0557 13.9549 18.6643 0
M  V30 8945 H  116.0573 15.4310 17.7154 0
M  V30 8946 N  111.3446 13.8608 20.8477 0
M  V30 8947 H  111.2428 14.8416 21.0728 0
M  V30 8948 C  110.3941 12.9509 21.4894 0 CFG=2
M  V30 8949 H  110.9580 12.1124 21.9013 0
M  V30 8950 C  109.3515 12.3835 20.5138 0
M  V30 8951 O  109.1603 11.1663 20.4855 0
M  V30 8952 C  109.7204 13.6656 22.6658 0
M  V30 8953 H  108.9914 13.0241 23.1623 0
M  V30 8954 H  110.4664 13.9453 23.4086 0
M  V30 8955 H  109.2068 14.5749 22.3501 0
M  V30 8956 N  108.7234 13.2715 19.7236 0
M  V30 8957 H  108.9314 14.2578 19.8244 0
M  V30 8958 C  107.7655 12.9288 18.6719 0 CFG=2
M  V30 8959 H  107.0326 12.2382 19.0904 0
M  V30 8960 C  108.4049 12.2198 17.4713 0
M  V30 8961 O  107.8048 11.2888 16.9341 0
M  V30 8962 C  107.0483 14.2013 18.1676 0
M  V30 8963 H  107.7977 14.9557 17.9239 0
M  V30 8964 H  106.5481 13.9938 17.2238 0
M  V30 8965 C  106.0065 14.8227 19.0832 0
M  V30 8966 C  104.9718 14.0391 19.6387 0
M  V30 8967 H  104.9479 12.9699 19.4911 0
M  V30 8968 C  105.9637 16.2237 19.2508 0
M  V30 8969 H  106.7202 16.8484 18.8023 0
M  V30 8970 C  103.9552 14.6450 20.3629 0
M  V30 8971 H  103.1703 14.0402 20.7920 0
M  V30 8972 C  104.9353 16.8117 19.9733 0
M  V30 8973 H  104.9042 17.8849 20.0902 0
M  V30 8974 C  103.9298 16.0249 20.5173 0
M  V30 8975 H  103.1167 16.4900 21.0534 0
M  V30 8976 N  109.5927 12.6909 17.0586 0
M  V30 8977 H  110.0356 13.4423 17.5709 0
M  V30 8978 C  110.2183 12.3095 15.7960 0
M  V30 8979 H  111.2592 12.6307 15.8184 0
M  V30 8980 H  110.2081 11.2256 15.6713 0
M  V30 8981 C  109.5154 12.9949 14.6117 0
M  V30 8982 O  109.3891 12.3836 13.5517 0
M  V30 8983 N  109.0295 14.2329 14.8077 0
M  V30 8984 H  109.1834 14.6909 15.6950 0
M  V30 8985 C  108.2829 15.0113 13.8230 0 CFG=2
M  V30 8986 H  108.5894 14.7069 12.8245 0
M  V30 8987 C  108.6088 16.5021 13.9799 0
M  V30 8988 O  108.7507 16.9796 15.1054 0
M  V30 8989 C  106.7767 14.7170 13.9713 0
M  V30 8990 H  106.5668 13.6691 13.7527 0
M  V30 8991 H  106.4614 14.8990 14.9970 0
M  V30 8992 O  105.9890 15.5224 13.1170 0
M  V30 8993 H  105.1538 15.0664 12.9618 0
M  V30 8994 N  108.6903 17.2043 12.8385 0
M  V30 8995 H  108.5471 16.7263 11.9586 0
M  V30 8996 C  108.9170 18.6500 12.7552 0 CFG=2
M  V30 8997 H  109.6302 18.9392 13.5293 0
M  V30 8998 C  107.6315 19.4677 12.9921 0
M  V30 8999 O  107.7227 20.5702 13.5320 0
M  V30 9000 C  109.5187 19.0273 11.3667 0
M  V30 9001 H  108.9210 18.5317 10.5997 0
M  V30 9002 C  109.5264 20.5316 11.0107 0
M  V30 9003 H  110.0687 20.7139 10.0826 0
M  V30 9004 H  108.5206 20.9250 10.8602 0
M  V30 9005 H  110.0075 21.1207 11.7922 0
M  V30 9006 C  110.9465 18.4758 11.2381 0
M  V30 9007 H  111.3712 18.7103 10.2628 0
M  V30 9008 H  111.6049 18.9040 11.9943 0
M  V30 9009 H  110.9652 17.3929 11.3545 0
M  V30 9010 N  106.4695 18.9186 12.6009 0
M  V30 9011 H  106.4687 17.9923 12.1969 0
M  V30 9012 C  105.1885 19.6279 12.5975 0 CFG=2
M  V30 9013 H  105.3764 20.7016 12.5635 0
M  V30 9014 C  104.3140 19.3782 13.8442 0
M  V30 9015 O  103.4131 20.1827 14.0868 0
M  V30 9016 C  104.3568 19.2625 11.3404 0
M  V30 9017 H  103.4120 19.8063 11.3968 0
M  V30 9018 C  105.0400 19.7454 10.0491 0
M  V30 9019 H  104.4155 19.5473 9.1772 0
M  V30 9020 H  105.2276 20.8191 10.0806 0
M  V30 9021 H  105.9961 19.2458 9.8881 0
M  V30 9022 C  104.0016 17.7701 11.2404 0
M  V30 9023 H  103.3600 17.5956 10.3802 0
M  V30 9024 H  104.8902 17.1515 11.1129 0
M  V30 9025 H  103.4683 17.4113 12.1193 0
M  V30 9026 N  104.5727 18.3056 14.6175 0
M  V30 9027 H  105.3148 17.6677 14.3640 0
M  V30 9028 C  103.8893 18.0551 15.8944 0 CFG=2
M  V30 9029 H  102.8283 18.2116 15.7057 0
M  V30 9030 C  104.2489 19.0487 17.0269 0
M  V30 9031 O  103.3240 19.4509 17.7343 0
M  V30 9032 C  104.0469 16.5872 16.3488 0
M  V30 9033 H  105.0970 16.3045 16.2988 0
M  V30 9034 H  103.7656 16.4956 17.3983 0
M  V30 9035 C  103.1983 15.5721 15.5578 0
M  V30 9036 H  103.4375 15.7051 14.5030 0
M  V30 9037 C  103.5796 14.1316 15.9331 0
M  V30 9038 H  103.0454 13.7973 16.8229 0
M  V30 9039 H  103.3484 13.4434 15.1211 0
M  V30 9040 H  104.6399 14.0293 16.1437 0
M  V30 9041 C  101.6841 15.7908 15.7329 0
M  V30 9042 H  101.1688 14.8758 16.0260 0
M  V30 9043 H  101.4567 16.5352 16.4963 0
M  V30 9044 H  101.2351 16.1222 14.7977 0
M  V30 9045 N  105.5199 19.5157 17.1311 0
M  V30 9046 C  105.8786 20.6805 17.9603 0 CFG=2
M  V30 9047 H  105.6349 20.4298 18.9906 0
M  V30 9048 C  105.1776 21.9913 17.5730 0
M  V30 9049 O  104.7882 22.7294 18.4736 0
M  V30 9050 C  107.4063 20.8026 17.8204 0
M  V30 9051 H  107.6735 21.4869 17.0128 0
M  V30 9052 H  107.8849 21.1677 18.7299 0
M  V30 9053 C  107.8644 19.4068 17.4522 0
M  V30 9054 H  108.8288 19.3852 16.9461 0
M  V30 9055 H  107.9396 18.8017 18.3518 0
M  V30 9056 C  106.7242 18.8863 16.5952 0
M  V30 9057 H  106.8622 19.2169 15.5729 0
M  V30 9058 H  106.6925 17.7989 16.6075 0
M  V30 9059 N  105.0299 22.2479 16.2597 0
M  V30 9060 H  105.3771 21.5816 15.5848 0
M  V30 9061 C  104.4574 23.4785 15.7049 0 CFG=2
M  V30 9062 H  105.0075 24.3090 16.1528 0
M  V30 9063 C  102.9739 23.6731 16.0758 0
M  V30 9064 O  102.6352 24.7290 16.6089 0
M  V30 9065 C  104.6487 23.5693 14.1569 0 CFG=2
M  V30 9066 H  104.2954 22.6320 13.7280 0
M  V30 9067 C  106.1506 23.6895 13.8055 0
M  V30 9068 H  106.5184 24.6632 14.1315 0
M  V30 9069 H  106.7297 22.9567 14.3670 0
M  V30 9070 C  103.8524 24.7040 13.4675 0
M  V30 9071 H  104.0760 24.7636 12.4027 0
M  V30 9072 H  102.7753 24.5534 13.5372 0
M  V30 9073 H  104.0871 25.6742 13.9066 0
M  V30 9074 C  106.4701 23.5068 12.3124 0
M  V30 9075 H  107.4299 23.0076 12.1779 0
M  V30 9076 H  105.7154 22.9093 11.8013 0
M  V30 9077 H  106.5283 24.4699 11.8050 0
M  V30 9078 N  102.1310 22.6537 15.8233 0
M  V30 9079 H  102.4799 21.8101 15.3898 0
M  V30 9080 C  100.6980 22.6905 16.1420 0 CFG=2
M  V30 9081 H  100.3097 23.6268 15.7350 0
M  V30 9082 C  100.4105 22.7209 17.6561 0
M  V30 9083 O  99.4476 23.3694 18.0630 0
M  V30 9084 C  99.9509 21.5477 15.4153 0
M  V30 9085 H  98.8810 21.6978 15.5608 0
M  V30 9086 H  100.1207 21.6490 14.3433 0
M  V30 9087 C  100.2962 20.1142 15.8712 0
M  V30 9088 H  101.3511 19.9227 15.6928 0
M  V30 9089 H  100.1610 20.0247 16.9488 0
M  V30 9090 C  99.4410 19.0169 15.2084 0
M  V30 9091 H  99.6917 18.0586 15.6628 0
M  V30 9092 H  98.3938 19.1829 15.4631 0
M  V30 9093 C  99.5727 18.8978 13.6787 0
M  V30 9094 H  98.8724 18.1471 13.3114 0
M  V30 9095 H  99.3121 19.8323 13.1835 0
M  V30 9096 N  100.9296 18.5037 13.2667 0 CHG=1
M  V30 9097 H  101.5962 19.2007 13.5723 0
M  V30 9098 H  101.1596 17.6119 13.6808 0
M  V30 9099 H  100.9638 18.4222 12.2604 0
M  V30 9100 N  101.2680 22.0633 18.4569 0
M  V30 9101 H  102.0383 21.5514 18.0501 0
M  V30 9102 C  101.1936 22.0641 19.9155 0 CFG=2
M  V30 9103 H  100.1588 21.8668 20.2005 0
M  V30 9104 C  101.5897 23.4157 20.5331 0
M  V30 9105 O  100.9119 23.8513 21.4595 0
M  V30 9106 C  102.0510 20.9188 20.4692 0
M  V30 9107 H  102.0729 20.9258 21.5600 0
M  V30 9108 H  101.6559 19.9512 20.1580 0
M  V30 9109 H  103.0773 20.9848 20.1085 0
M  V30 9110 N  102.6355 24.0679 19.9907 0
M  V30 9111 H  103.1432 23.6356 19.2299 0
M  V30 9112 C  103.1243 25.3877 20.4135 0 CFG=2
M  V30 9113 H  103.2783 25.3529 21.4933 0
M  V30 9114 C  102.1262 26.5243 20.1123 0
M  V30 9115 O  102.0038 27.4334 20.9332 0
M  V30 9116 C  104.4831 25.7300 19.7375 0 CFG=2
M  V30 9117 H  104.4145 25.5144 18.6701 0
M  V30 9118 O  105.4689 24.8673 20.2665 0
M  V30 9119 H  105.2897 23.9757 19.9516 0
M  V30 9120 C  105.0029 27.1735 19.8939 0
M  V30 9121 H  106.0142 27.2682 19.4989 0
M  V30 9122 H  104.3882 27.8903 19.3489 0
M  V30 9123 H  105.0250 27.4786 20.9394 0
M  V30 9124 N  101.4163 26.4417 18.9722 0
M  V30 9125 H  101.5843 25.6738 18.3361 0
M  V30 9126 C  100.3681 27.3885 18.5790 0 CFG=2
M  V30 9127 H  100.7907 28.3933 18.6318 0
M  V30 9128 C  99.1658 27.3588 19.5362 0
M  V30 9129 O  98.7041 28.4225 19.9448 0
M  V30 9130 C  99.9212 27.1009 17.1285 0
M  V30 9131 H  99.7459 26.0284 17.0279 0
M  V30 9132 H  98.9586 27.5750 16.9273 0
M  V30 9133 C  100.9263 27.5739 16.0546 0
M  V30 9134 H  101.9086 27.1959 16.3371 0
M  V30 9135 C  100.6029 26.9566 14.6770 0
M  V30 9136 H  101.4817 26.4623 14.2642 0
M  V30 9137 H  99.8141 26.2063 14.7363 0
M  V30 9138 H  100.2763 27.6971 13.9471 0
M  V30 9139 C  101.0423 29.1133 16.0002 0
M  V30 9140 H  100.9518 29.5108 14.9895 0
M  V30 9141 H  100.2776 29.6038 16.6035 0
M  V30 9142 H  102.0108 29.4378 16.3820 0
M  V30 9143 N  98.7168 26.1490 19.9105 0
M  V30 9144 H  99.1522 25.3173 19.5360 0
M  V30 9145 C  97.6350 25.9368 20.8751 0 CFG=2
M  V30 9146 H  96.8235 26.6213 20.6213 0
M  V30 9147 C  98.0487 26.2573 22.3226 0
M  V30 9148 O  97.1906 26.6861 23.0915 0
M  V30 9149 C  97.0876 24.5030 20.7375 0
M  V30 9150 H  97.8879 23.7803 20.9059 0
M  V30 9151 H  96.3416 24.3155 21.5115 0
M  V30 9152 C  96.4451 24.2524 19.3642 0
M  V30 9153 H  95.5949 24.9208 19.2257 0
M  V30 9154 H  97.1513 24.4982 18.5724 0
M  V30 9155 S  95.8704 22.5585 19.0888 0
M  V30 9156 C  95.9672 22.5251 17.2814 0
M  V30 9157 H  95.5153 21.6154 16.8916 0
M  V30 9158 H  95.4470 23.3828 16.8567 0
M  V30 9159 H  97.0066 22.5592 16.9571 0
M  V30 9160 N  99.3462 26.1022 22.6477 0
M  V30 9161 H  99.9847 25.7276 21.9595 0
M  V30 9162 C  99.9365 26.4636 23.9406 0 CFG=2
M  V30 9163 H  99.2971 26.0648 24.7267 0
M  V30 9164 C  100.0378 27.9840 24.1522 0
M  V30 9165 O  99.9411 28.4318 25.2933 0
M  V30 9166 C  101.3256 25.8207 24.0890 0
M  V30 9167 H  101.9790 26.0777 23.2575 0
M  V30 9168 H  101.8147 26.1690 24.9993 0
M  V30 9169 O  101.2089 24.4209 24.1895 0
M  V30 9170 H  100.9694 24.0748 23.3229 0
M  V30 9171 N  100.2109 28.7433 23.0568 0
M  V30 9172 H  100.3123 28.2957 22.1560 0
M  V30 9173 C  100.2186 30.2044 23.0504 0 CFG=2
M  V30 9174 H  100.7697 30.5544 23.9258 0
M  V30 9175 C  98.8003 30.7972 23.1133 0
M  V30 9176 O  98.6086 31.8038 23.7944 0
M  V30 9177 C  100.9622 30.6938 21.7987 0
M  V30 9178 H  101.0043 31.7831 21.7643 0
M  V30 9179 H  101.9890 30.3265 21.7869 0
M  V30 9180 H  100.4793 30.3505 20.8830 0
M  V30 9181 N  97.8373 30.1566 22.4247 0
M  V30 9182 H  98.0834 29.3466 21.8722 0
M  V30 9183 C  96.4239 30.5443 22.3980 0 CFG=2
M  V30 9184 H  96.3732 31.6126 22.1799 0
M  V30 9185 C  95.7253 30.3281 23.7503 0
M  V30 9186 O  95.0040 31.2237 24.1899 0
M  V30 9187 C  95.6907 29.7689 21.2806 0
M  V30 9188 H  95.9662 28.7166 21.3580 0
M  V30 9189 H  94.6136 29.7997 21.4419 0
M  V30 9190 C  95.9625 30.2876 19.8519 0
M  V30 9191 H  97.0399 30.4166 19.7482 0
M  V30 9192 C  95.5404 29.2446 18.7922 0
M  V30 9193 H  96.3876 28.9740 18.1613 0
M  V30 9194 H  95.1740 28.3224 19.2441 0
M  V30 9195 H  94.7500 29.6015 18.1331 0
M  V30 9196 C  95.3200 31.6721 19.6097 0
M  V30 9197 H  94.6985 31.7002 18.7153 0
M  V30 9198 H  94.6879 31.9851 20.4416 0
M  V30 9199 H  96.0882 32.4359 19.4857 0
M  V30 9200 N  95.9591 29.1673 24.3910 0
M  V30 9201 H  96.5474 28.4625 23.9657 0
M  V30 9202 C  95.3797 28.8328 25.6946 0 CFG=2
M  V30 9203 H  94.3152 29.0633 25.6394 0
M  V30 9204 C  95.9800 29.6761 26.8420 0
M  V30 9205 O  95.2303 30.0728 27.7296 0
M  V30 9206 C  95.4943 27.3162 26.0191 0 CFG=2
M  V30 9207 H  95.1124 26.7511 25.1676 0
M  V30 9208 O  94.7065 26.9727 27.1435 0
M  V30 9209 H  94.7977 26.0221 27.2859 0
M  V30 9210 C  96.9179 26.8301 26.3309 0
M  V30 9211 H  96.9848 25.7435 26.2912 0
M  V30 9212 H  97.6205 27.2276 25.6070 0
M  V30 9213 H  97.2555 27.1453 27.3190 0
M  V30 9214 N  97.2883 29.9928 26.7665 0
M  V30 9215 H  97.8414 29.6309 26.0023 0
M  V30 9216 C  97.9940 30.8590 27.7154 0 CFG=2
M  V30 9217 H  97.7204 30.5116 28.7120 0
M  V30 9218 C  97.5584 32.3298 27.6043 0
M  V30 9219 O  97.3434 32.9647 28.6353 0
M  V30 9220 C  99.5229 30.6773 27.5372 0
M  V30 9221 H  99.7736 29.6387 27.7507 0
M  V30 9222 H  99.7593 30.8228 26.4818 0
M  V30 9223 C  100.4677 31.5984 28.3554 0
M  V30 9224 H  100.2943 32.6128 27.9981 0
M  V30 9225 C  100.1871 31.6125 29.8753 0
M  V30 9226 H  100.0796 32.6357 30.2338 0
M  V30 9227 H  99.2752 31.0870 30.1465 0
M  V30 9228 H  100.9865 31.1573 30.4554 0
M  V30 9229 C  101.9476 31.2943 28.0389 0
M  V30 9230 H  102.4618 32.1932 27.6979 0
M  V30 9231 H  102.4986 30.9195 28.9011 0
M  V30 9232 H  102.0495 30.5492 27.2497 0
M  V30 9233 N  97.4153 32.8323 26.3653 0
M  V30 9234 H  97.6243 32.2440 25.5692 0
M  V30 9235 C  97.0005 34.2040 26.0709 0
M  V30 9236 H  97.6754 34.9134 26.5523 0
M  V30 9237 H  97.0735 34.3652 24.9958 0
M  V30 9238 C  95.5556 34.4545 26.5215 0
M  V30 9239 O  95.2905 35.4627 27.1763 0
M  V30 9240 N  94.6445 33.5121 26.2189 0
M  V30 9241 H  94.9234 32.7102 25.6694 0
M  V30 9242 C  93.2525 33.5302 26.6698 0 CFG=2
M  V30 9243 H  92.8493 34.5032 26.3827 0
M  V30 9244 C  93.1030 33.4141 28.1986 0
M  V30 9245 O  92.2592 34.1136 28.7518 0
M  V30 9246 C  92.4364 32.4698 25.9030 0
M  V30 9247 H  91.3736 32.6131 26.0881 0
M  V30 9248 H  92.5894 32.5740 24.8303 0
M  V30 9249 O  92.7450 31.1456 26.2787 0
M  V30 9250 H  93.5951 30.9124 25.8955 0
M  V30 9251 N  93.9472 32.5924 28.8519 0
M  V30 9252 H  94.6090 32.0416 28.3221 0
M  V30 9253 C  93.9821 32.4127 30.3073 0 CFG=2
M  V30 9254 H  92.9678 32.1687 30.6295 0
M  V30 9255 C  94.4121 33.6906 31.0535 0
M  V30 9256 O  93.7873 34.0054 32.0624 0
M  V30 9257 C  94.9199 31.2413 30.7202 0 CFG=2
M  V30 9258 H  95.8340 31.2909 30.1291 0
M  V30 9259 O  94.2824 30.0252 30.3872 0
M  V30 9260 H  94.2786 29.9384 29.4279 0
M  V30 9261 C  95.3314 31.1478 32.2012 0
M  V30 9262 H  95.9017 30.2382 32.3842 0
M  V30 9263 H  95.9746 31.9759 32.4973 0
M  V30 9264 H  94.4609 31.1369 32.8575 0
M  V30 9265 N  95.4228 34.4213 30.5475 0
M  V30 9266 H  95.9039 34.1104 29.7135 0
M  V30 9267 C  95.8774 35.6862 31.1393 0 CFG=2
M  V30 9268 H  96.0249 35.5149 32.2076 0
M  V30 9269 C  94.8475 36.8248 31.0255 0
M  V30 9270 O  94.7915 37.6540 31.9324 0
M  V30 9271 C  97.2344 36.1096 30.5440 0
M  V30 9272 H  97.1665 36.1044 29.4554 0
M  V30 9273 H  97.4600 37.1397 30.8260 0
M  V30 9274 C  98.4010 35.2200 31.0056 0
M  V30 9275 H  98.4118 35.1774 32.0951 0
M  V30 9276 H  98.2556 34.1956 30.6696 0
M  V30 9277 S  100.0515 35.7675 30.4846 0
M  V30 9278 C  99.8809 35.7000 28.6817 0
M  V30 9279 H  100.8516 35.8445 28.2079 0
M  V30 9280 H  99.4843 34.7353 28.3712 0
M  V30 9281 H  99.2083 36.4812 28.3279 0
M  V30 9282 N  94.0339 36.8290 29.9550 0
M  V30 9283 H  94.1434 36.1178 29.2448 0
M  V30 9284 C  92.9505 37.7939 29.7710 0
M  V30 9285 H  93.2763 38.7995 30.0411 0
M  V30 9286 H  92.6865 37.8230 28.7175 0
M  V30 9287 C  91.7211 37.4162 30.6101 0
M  V30 9288 O  91.0644 38.3085 31.1406 0
M  V30 9289 N  91.4414 36.1122 30.7845 0
M  V30 9290 H  91.9921 35.4189 30.2949 0
M  V30 9291 C  90.4092 35.5870 31.6863 0 CFG=2
M  V30 9292 H  89.4798 36.1113 31.4541 0
M  V30 9293 C  90.7268 35.8707 33.1708 0
M  V30 9294 O  89.8157 36.2244 33.9164 0
M  V30 9295 C  90.1718 34.0616 31.4475 0 CFG=2
M  V30 9296 H  91.1559 33.6063 31.3356 0
M  V30 9297 C  89.4100 33.8392 30.1182 0
M  V30 9298 H  88.3527 34.0633 30.2644 0
M  V30 9299 H  89.7481 34.5503 29.3643 0
M  V30 9300 C  89.4629 33.2925 32.5875 0
M  V30 9301 H  89.2893 32.2520 32.3127 0
M  V30 9302 H  90.0555 33.2702 33.5024 0
M  V30 9303 H  88.4949 33.7367 32.8219 0
M  V30 9304 C  89.5560 32.4218 29.5384 0
M  V30 9305 H  89.6137 32.4530 28.4503 0
M  V30 9306 H  90.4578 31.9229 29.8943 0
M  V30 9307 H  88.7030 31.7982 29.8058 0
M  V30 9308 N  92.0118 35.7747 33.5547 0
M  V30 9309 H  92.7042 35.4454 32.8942 0
M  V30 9310 C  92.5079 36.1477 34.8794 0 CFG=2
M  V30 9311 H  91.8552 35.6869 35.6224 0
M  V30 9312 C  92.4660 37.6631 35.1297 0
M  V30 9313 O  92.1648 38.0548 36.2529 0
M  V30 9314 C  93.9475 35.6351 35.0756 0
M  V30 9315 H  94.5433 35.9126 34.2047 0
M  V30 9316 H  94.3944 36.1563 35.9195 0
M  V30 9317 C  94.0848 34.1255 35.3552 0
M  V30 9318 H  93.5970 33.5852 34.5450 0
M  V30 9319 C  95.5743 33.7197 35.3355 0
M  V30 9320 H  95.7398 32.8846 34.6573 0
M  V30 9321 H  96.2174 34.5294 34.9909 0
M  V30 9322 H  95.9444 33.4274 36.3183 0
M  V30 9323 C  93.3752 33.7057 36.6595 0
M  V30 9324 H  93.9870 33.0570 37.2812 0
M  V30 9325 H  93.1053 34.5636 37.2736 0
M  V30 9326 H  92.4578 33.1597 36.4384 0
M  V30 9327 N  92.7363 38.4889 34.1031 0
M  V30 9328 H  92.9871 38.1085 33.2010 0
M  V30 9329 C  92.6226 39.9497 34.1980 0 CFG=2
M  V30 9330 H  93.1351 40.2687 35.1083 0
M  V30 9331 C  91.1505 40.4050 34.3115 0
M  V30 9332 O  90.8698 41.3525 35.0411 0
M  V30 9333 C  93.2952 40.6664 32.9960 0 CFG=2
M  V30 9334 H  92.8523 40.3122 32.0654 0
M  V30 9335 O  94.6646 40.3179 32.9572 0
M  V30 9336 H  94.7377 39.3826 32.7391 0
M  V30 9337 C  93.2321 42.2038 33.0212 0
M  V30 9338 H  93.8556 42.6293 32.2365 0
M  V30 9339 H  92.2193 42.5785 32.8700 0
M  V30 9340 H  93.6035 42.5973 33.9660 0
M  V30 9341 N  90.2286 39.6744 33.6626 0
M  V30 9342 H  90.5269 38.9129 33.0675 0
M  V30 9343 C  88.7833 39.8631 33.7835 0 CFG=2
M  V30 9344 H  88.5810 40.9183 33.6041 0
M  V30 9345 C  88.2404 39.5252 35.1906 0
M  V30 9346 O  87.2986 40.1771 35.6363 0
M  V30 9347 C  88.0941 39.0665 32.6589 0
M  V30 9348 H  88.5328 39.3551 31.7036 0
M  V30 9349 H  88.3065 38.0042 32.7697 0
M  V30 9350 C  86.6100 39.2200 32.5137 0
M  V30 9351 C  85.9933 40.2310 31.8613 0
M  V30 9352 H  86.5088 41.0389 31.3623 0
M  V30 9353 C  85.5427 38.3849 33.0595 0
M  V30 9354 N  84.6266 40.0578 31.9271 0
M  V30 9355 H  83.9731 40.7009 31.5035 0
M  V30 9356 C  85.5019 37.2131 33.8510 0
M  V30 9357 H  86.4280 36.7646 34.1746 0
M  V30 9358 C  84.2889 38.9363 32.6552 0
M  V30 9359 C  84.2763 36.6220 34.2219 0
M  V30 9360 H  84.2731 35.7291 34.8296 0
M  V30 9361 C  83.0605 38.3522 33.0111 0
M  V30 9362 H  82.1307 38.7983 32.6906 0
M  V30 9363 C  83.0572 37.1881 33.8002 0
M  V30 9364 H  82.1199 36.7319 34.0814 0
M  V30 9365 N  88.8605 38.5554 35.8848 0
M  V30 9366 H  89.6252 38.0485 35.4614 0
M  V30 9367 C  88.5059 38.1788 37.2555 0 CFG=2
M  V30 9368 H  87.4236 38.2640 37.3653 0
M  V30 9369 C  89.1567 39.1183 38.2941 0
M  V30 9370 O  88.4431 39.6530 39.1417 0
M  V30 9371 C  88.8902 36.6973 37.5700 0 CFG=2
M  V30 9372 H  89.9397 36.5751 37.2977 0
M  V30 9373 C  88.0753 35.7130 36.7001 0
M  V30 9374 H  87.0623 35.6277 37.0959 0
M  V30 9375 H  87.9557 36.1050 35.6931 0
M  V30 9376 C  88.7533 36.2868 39.0557 0
M  V30 9377 H  88.9969 35.2348 39.2025 0
M  V30 9378 H  89.4248 36.8448 39.7058 0
M  V30 9379 H  87.7363 36.4399 39.4170 0
M  V30 9380 C  88.7054 34.3157 36.5859 0
M  V30 9381 H  88.3711 33.8162 35.6763 0
M  V30 9382 H  89.7942 34.3640 36.5485 0
M  V30 9383 H  88.4260 33.6845 37.4297 0
M  V30 9384 N  90.4916 39.2714 38.2289 0
M  V30 9385 H  91.0074 38.8157 37.4858 0
M  V30 9386 C  91.3046 39.8748 39.2891 0 CFG=2
M  V30 9387 H  90.7618 39.7611 40.2267 0
M  V30 9388 C  91.5535 41.3868 39.1734 0
M  V30 9389 O  91.8577 41.9864 40.2030 0
M  V30 9390 C  92.6276 39.0938 39.4649 0
M  V30 9391 H  93.1220 38.9539 38.5036 0
M  V30 9392 H  93.3272 39.6725 40.0708 0
M  V30 9393 C  92.4548 37.7437 40.1411 0
M  V30 9394 C  92.3117 37.6799 41.5431 0
M  V30 9395 H  92.4136 38.5753 42.1384 0
M  V30 9396 C  92.2469 36.5728 39.3813 0
M  V30 9397 H  92.3059 36.6017 38.3052 0
M  V30 9398 C  92.0180 36.4720 42.1606 0
M  V30 9399 H  91.9104 36.4262 43.2340 0
M  V30 9400 C  91.9487 35.3747 40.0160 0
M  V30 9401 H  91.7898 34.4799 39.4323 0
M  V30 9402 C  91.8354 35.3266 41.3989 0
M  V30 9403 H  91.5942 34.3955 41.8855 0
M  V30 9404 N  91.4212 41.9830 37.9749 0
M  V30 9405 H  91.1731 41.4394 37.1593 0
M  V30 9406 C  91.5892 43.4297 37.7730 0 CFG=2
M  V30 9407 H  92.0051 43.8918 38.6707 0
M  V30 9408 C  90.2248 44.0974 37.5238 0
M  V30 9409 O  89.9258 45.0885 38.1902 0
M  V30 9410 C  92.5619 43.7697 36.6044 0
M  V30 9411 H  92.1860 43.3149 35.6918 0
M  V30 9412 C  92.6890 45.2761 36.2953 0
M  V30 9413 H  93.4489 45.4546 35.5348 0
M  V30 9414 H  91.7602 45.6968 35.9090 0
M  V30 9415 H  92.9718 45.8401 37.1844 0
M  V30 9416 C  93.9594 43.1774 36.8607 0
M  V30 9417 H  94.6510 43.4253 36.0558 0
M  V30 9418 H  94.3853 43.5562 37.7903 0
M  V30 9419 H  93.9247 42.0899 36.9287 0
M  V30 9420 N  89.4089 43.5276 36.6152 0
M  V30 9421 H  89.7360 42.7373 36.0752 0
M  V30 9422 C  88.0433 43.9972 36.3217 0 CFG=2
M  V30 9423 H  88.0822 45.0886 36.3281 0
M  V30 9424 C  87.0264 43.6190 37.4207 0
M  V30 9425 O  85.9534 44.2199 37.4664 0
M  V30 9426 C  87.5120 43.6045 34.9170 0
M  V30 9427 H  86.5872 44.1499 34.7256 0
M  V30 9428 H  87.2724 42.5455 34.9135 0
M  V30 9429 C  88.4532 43.8694 33.7347 0
M  V30 9430 O  89.4391 44.6168 33.9108 0
M  V30 9431 O  88.1255 43.3708 32.6345 0 CHG=-1
M  V30 9432 N  87.3968 42.6837 38.3132 0
M  V30 9433 H  88.2864 42.2224 38.1885 0
M  V30 9434 C  86.7076 42.4375 39.5776 0
M  V30 9435 H  86.4269 43.3817 40.0469 0
M  V30 9436 H  87.4172 41.9506 40.2443 0
M  V30 9437 C  85.4762 41.5305 39.4617 0
M  V30 9438 O  84.6664 41.5196 40.3898 0
M  V30 9439 N  85.3210 40.7715 38.3625 0
M  V30 9440 H  86.0111 40.8084 37.6256 0
M  V30 9441 C  84.2360 39.7995 38.1995 0 CFG=2
M  V30 9442 H  83.3006 40.2948 38.4700 0
M  V30 9443 C  84.4283 38.5940 39.1344 0
M  V30 9444 O  85.5139 38.0157 39.1689 0
M  V30 9445 C  84.1109 39.3675 36.7278 0
M  V30 9446 H  85.0414 38.9166 36.3815 0
M  V30 9447 H  83.3482 38.5935 36.6324 0
M  V30 9448 C  83.7346 40.4944 35.7968 0
M  V30 9449 N  84.6682 41.3347 35.2178 0
M  V30 9450 H  85.6732 41.2715 35.3248 0
M  V30 9451 C  82.5133 40.9216 35.3238 0
M  V30 9452 H  81.5283 40.5290 35.5282 0
M  V30 9453 C  84.0029 42.2077 34.4588 0
M  V30 9454 H  84.4863 42.9800 33.8786 0
M  V30 9455 N  82.6894 42.0151 34.4720 0
M  V30 9456 N  83.3645 38.2689 39.8898 0
M  V30 9457 H  82.5154 38.8032 39.7747 0
M  V30 9458 C  83.3024 37.2237 40.9214 0 CFG=2
M  V30 9459 H  82.2777 37.2539 41.2905 0
M  V30 9460 C  84.1626 37.4980 42.1774 0
M  V30 9461 O  84.3908 36.5755 42.9597 0
M  V30 9462 C  83.5217 35.8078 40.3243 0
M  V30 9463 H  83.5520 35.0602 41.1174 0
M  V30 9464 H  84.4896 35.7396 39.8276 0
M  V30 9465 C  82.4448 35.3760 39.3451 0
M  V30 9466 C  81.2241 34.8572 39.8252 0
M  V30 9467 H  81.0873 34.6837 40.8812 0
M  V30 9468 C  82.5790 35.6446 37.9659 0
M  V30 9469 H  83.4882 36.0842 37.5818 0
M  V30 9470 C  80.1947 34.5649 38.9412 0
M  V30 9471 H  79.2649 34.1601 39.3141 0
M  V30 9472 C  81.5398 35.3406 37.0966 0
M  V30 9473 H  81.6493 35.5318 36.0400 0
M  V30 9474 C  80.3549 34.8005 37.5815 0
M  V30 9475 H  79.5499 34.5717 36.8986 0
M  V30 9476 N  84.5978 38.7565 42.3792 0
M  V30 9477 H  84.3855 39.4711 41.6970 0
M  V30 9478 C  85.4088 39.1786 43.5269 0 CFG=2
M  V30 9479 H  86.2082 38.4494 43.6193 0
M  V30 9480 C  84.6720 39.1509 44.8775 0
M  V30 9481 O  85.3078 38.8710 45.8918 0
M  V30 9482 C  86.0763 40.5354 43.2309 0
M  V30 9483 H  86.8561 40.7318 43.9657 0
M  V30 9484 H  86.5735 40.5090 42.2609 0
M  V30 9485 O  85.1627 41.6156 43.2595 0
M  V30 9486 H  84.7615 41.6949 42.3879 0
M  V30 9487 N  83.3515 39.3929 44.8638 0
M  V30 9488 H  82.9018 39.6335 43.9929 0
M  V30 9489 C  82.4832 39.2868 46.0386 0 CFG=2
M  V30 9490 H  83.0209 39.6686 46.9092 0
M  V30 9491 C  82.0838 37.8309 46.3479 0
M  V30 9492 O  81.7869 37.5300 47.5029 0
M  V30 9493 C  81.2334 40.1643 45.8244 0
M  V30 9494 H  80.7022 39.8432 44.9268 0
M  V30 9495 H  80.5429 40.0138 46.6561 0
M  V30 9496 C  81.5549 41.6669 45.7304 0
M  V30 9497 H  82.0980 41.9767 46.6243 0
M  V30 9498 H  82.2240 41.8510 44.8889 0
M  V30 9499 C  80.2973 42.5331 45.5705 0
M  V30 9500 H  79.7536 42.2188 44.6785 0
M  V30 9501 H  79.6288 42.3583 46.4148 0
M  V30 9502 C  80.6246 44.0301 45.4744 0
M  V30 9503 H  81.1551 44.3601 46.3684 0
M  V30 9504 H  81.2781 44.2214 44.6224 0
M  V30 9505 N  79.4028 44.8387 45.3244 0 CHG=1
M  V30 9506 H  78.8010 44.6945 46.1227 0
M  V30 9507 H  79.6504 45.8162 45.2643 0
M  V30 9508 H  78.9161 44.5644 44.4829 0
M  V30 9509 N  82.0902 36.9633 45.3204 0
M  V30 9510 H  82.3725 37.2891 44.4080 0
M  V30 9511 C  81.7287 35.5481 45.4064 0 CFG=2
M  V30 9512 H  80.8572 35.4496 46.0571 0
M  V30 9513 C  82.8633 34.7073 46.0131 0
M  V30 9514 O  82.6058 33.9186 46.9214 0
M  V30 9515 C  81.3423 35.0087 44.0112 0
M  V30 9516 H  82.1837 35.1067 43.3256 0
M  V30 9517 H  81.1581 33.9365 44.0900 0
M  V30 9518 C  80.1446 35.6100 43.3274 0
M  V30 9519 C  79.9819 36.9117 42.9899 0
M  V30 9520 H  80.6923 37.6974 43.1965 0
M  V30 9521 C  78.9584 34.9215 42.8203 0
M  V30 9522 N  78.7830 37.0767 42.3299 0
M  V30 9523 H  78.4646 37.9726 41.9891 0
M  V30 9524 C  78.5150 33.5770 42.8157 0
M  V30 9525 H  79.1263 32.8149 43.2756 0
M  V30 9526 C  78.1087 35.8825 42.1913 0
M  V30 9527 C  77.2904 33.2115 42.2199 0
M  V30 9528 H  76.9758 32.1783 42.2306 0
M  V30 9529 C  76.8847 35.5308 41.5953 0
M  V30 9530 H  76.2676 36.2832 41.1270 0
M  V30 9531 C  76.4751 34.1851 41.6109 0
M  V30 9532 H  75.5382 33.8990 41.1561 0
M  V30 9533 N  84.0924 34.9047 45.5057 0
M  V30 9534 H  84.2144 35.5622 44.7467 0
M  V30 9535 C  85.3050 34.2207 45.9633 0 CFG=2
M  V30 9536 H  85.0324 33.2197 46.3010 0
M  V30 9537 C  85.9652 34.9099 47.1716 0
M  V30 9538 O  86.8084 34.2784 47.8076 0
M  V30 9539 C  86.3046 34.1010 44.7851 0
M  V30 9540 H  86.2491 34.9900 44.1562 0
M  V30 9541 H  87.3262 34.0949 45.1630 0
M  V30 9542 C  86.1481 32.8289 43.9234 0
M  V30 9543 H  86.9182 32.9143 43.1568 0
M  V30 9544 C  86.4564 31.5389 44.7176 0
M  V30 9545 H  87.2487 30.9631 44.2405 0
M  V30 9546 H  86.7974 31.7507 45.7314 0
M  V30 9547 H  85.5891 30.8841 44.8007 0
M  V30 9548 C  84.8080 32.7686 43.1642 0
M  V30 9549 H  84.9547 32.3915 42.1517 0
[truncated: 585,218 more chars]
