# Supplementary material for: Molecular insights into Mmpl3 lead to the development of novel indole-2-carboxamides as antitubercular agents
Source: Royal Society of Chemistry journal article supplement (doi:10.1039/d1me00122a), 2022-01-01
Supplement: d1me00122a5.sdf [file d1me00122a5.sdf]

GR-5
                    3D
 Structure written by MMmdl.
 42 44  0  0  1  0            999 V2000
   -3.3343    1.7168   -0.0363 C   0  0  0  0  0  0
   -2.1814    0.9240   -0.0524 C   0  0  0  0  0  0
   -2.2270   -0.4976   -0.0065 C   0  0  0  0  0  0
   -3.4843   -1.1233    0.0566 C   0  0  0  0  0  0
   -4.6357   -0.3382    0.0724 C   0  0  0  0  0  0
   -4.5584    1.0510    0.0270 C   0  0  0  0  0  0
   -0.8717   -0.9840   -0.0413 C   0  0  0  0  0  0
   -0.0440    0.1451   -0.0970 C   0  0  0  0  0  0
   -0.8521    1.2638   -0.1177 N   0  0  0  0  0  0
   -0.4971   -2.4542   -0.0164 C   0  0  0  0  0  0
    1.3973    0.2146   -0.2252 C   0  0  0  0  0  0
    1.9431    1.3913    0.1477 N   0  0  0  0  0  0
    3.3646    1.7564    0.0908 C   0  0  1  0  0  0
    3.8491    2.4200   -1.2353 C   0  0  1  0  0  0
    5.3907    2.5199   -1.2101 C   0  0  0  0  0  0
    5.8653    3.3975   -0.0354 C   0  0  0  0  0  0
    5.3291    2.8760    1.3141 C   0  0  0  0  0  0
    3.8050    2.6104    1.3042 C   0  0  0  0  0  0
    2.0537   -0.7373   -0.6489 O   0  0  0  0  0  0
    3.3596    1.7158   -2.5175 C   0  0  0  0  0  0
   -3.2887    2.7953   -0.0730 H   0  0  0  0  0  0
   -3.5629   -2.1998    0.0915 H   0  0  0  0  0  0
   -5.6040   -0.8150    0.1192 H   0  0  0  0  0  0
   -5.4713    1.6282    0.0398 H   0  0  0  0  0  0
   -0.4700    2.1960   -0.1822 H   0  0  0  0  0  0
    0.5667   -2.6310    0.1340 H   0  0  0  0  0  0
   -0.7767   -2.9503   -0.9459 H   0  0  0  0  0  0
   -1.0104   -2.9783    0.7902 H   0  0  0  0  0  0
    1.3246    2.1090    0.4952 H   0  0  0  0  0  0
    3.9082    0.8145    0.2059 H   0  0  0  0  0  0
    3.4785    3.4472   -1.2467 H   0  0  0  0  0  0
    5.8433    1.5270   -1.1874 H   0  0  0  0  0  0
    5.7425    2.9636   -2.1428 H   0  0  0  0  0  0
    6.9551    3.4340   -0.0132 H   0  0  0  0  0  0
    5.5293    4.4244   -0.1876 H   0  0  0  0  0  0
    5.8460    1.9479    1.5631 H   0  0  0  0  0  0
    5.5788    3.5797    2.1091 H   0  0  0  0  0  0
    3.2760    3.5647    1.2896 H   0  0  0  0  0  0
    3.5221    2.1166    2.2352 H   0  0  0  0  0  0
    3.6776    0.6730   -2.5450 H   0  0  0  0  0  0
    3.7519    2.2039   -3.4101 H   0  0  0  0  0  0
    2.2726    1.7374   -2.5977 H   0  0  0  0  0  0
  1  2  1  0  0  0
  1  6  2  0  0  0
  1 21  1  0  0  0
  2  3  2  0  0  0
  2  9  1  0  0  0
  3  4  1  0  0  0
  3  7  1  0  0  0
  4  5  2  0  0  0
  4 22  1  0  0  0
  5  6  1  0  0  0
  5 23  1  0  0  0
  6 24  1  0  0  0
  7  8  2  0  0  0
  7 10  1  0  0  0
  8  9  1  0  0  0
  8 11  1  0  0  0
  9 25  1  0  0  0
 10 26  1  0  0  0
 10 27  1  0  0  0
 10 28  1  0  0  0
 11 12  1  0  0  0
 11 19  2  0  0  0
 12 13  1  0  0  0
 12 29  1  0  0  0
 13 18  1  0  0  0
 13 14  1  0  0  0
 13 30  1  0  0  0
 14 15  1  0  0  0
 14 20  1  0  0  0
 14 31  1  0  0  0
 15 16  1  0  0  0
 15 32  1  0  0  0
 15 33  1  0  0  0
 16 17  1  0  0  0
 16 34  1  0  0  0
 16 35  1  0  0  0
 17 18  1  0  0  0
 17 36  1  0  0  0
 17 37  1  0  0  0
 18 38  1  0  0  0
 18 39  1  0  0  0
 20 40  1  0  0  0
 20 41  1  0  0  0
 20 42  1  0  0  0
M  END
> <s_m_entry_id>
8184

> <s_m_entry_name>
entry

> <i_f3d_flags>
0

> <s_m_job_name>
adme_1000

> <r_psp_Prime_Energy>
-34938.0432912752

> <r_psp_Prime_Solv_GB>
-5194.57681669906

> <r_psp_Prime_Coulomb>
-26462.7275459149

> <r_psp_Prime_vdW>
-4520.02530763364

> <r_psp_Prime_Covalent>
4021.76499359254

> <i_psp_model_num>
0

> <r_psp_Prime_Lipo>
-2136.12190494384

> <s_psp_Prime_Energy_Force_Field>
OPLS3e

> <s_psp_Prime_Energy_Solvent_Model>
VSGB2.1

> <r_psp_Prime_Hbond>
-550.104175688741

> <r_psp_Prime_Packing>
-55.8446424272089

> <r_psp_Prime_SelfCont>
-40.4078915603482

> <r_psp_Memb1_x>
103.457542316003

> <r_psp_Memb1_y>
39.4731108300965

> <r_psp_Memb1_z>
48.7987221124676

> <r_psp_Memb2_x>
99.8134167309003

> <r_psp_Memb2_y>
2.81176945184187

> <r_psp_Memb2_z>
23.8404289603493

> <r_psp_MembDummyRadius>
4.45

> <r_psp_Prime_Bond_Covalent>
467.14079144399

> <r_psp_Prime_Bond_SGB>
49990.9892542772

> <r_psp_Prime_Angle_Covalent>
2222.48534938499

> <r_psp_Prime_Angle_SGB>
-21642.6622885493

> <r_psp_Prime_Torsion_Covalent>
1332.13885276356

> <r_psp_Prime_NB14_LJ>
4077.67532522667

> <r_psp_Prime_NB14_Lipo>
0

> <r_psp_Prime_NB14_Elec>
25574.3506183625

> <r_psp_Prime_NB14_SGB>
-15626.0783021708

> <r_psp_Prime_NBShort_LJ>
-8189.94090669715

> <r_psp_Prime_NBShort_Lipo>
-2136.12190494384

> <r_psp_Prime_NBShort_Elec>
-53055.0066709594

> <r_psp_Prime_NBShort_SGB>
18025.373077635

> <r_psp_Prime_NBLong_LJ>
-407.759726163158

> <r_psp_Prime_NBLong_Lipo>
0

> <r_psp_Prime_NBLong_Elec>
1017.92850668197

> <r_psp_Prime_NBLong_SGB>
-1169.82127024442

> <r_psp_Prime_Self_SGB>
-34772.3772876467

> <s_m_Source_Path>
F:\Dekstop_files\DAC4,5\Molecular Systems Desgn and Engineering\supplementary_str

> <s_m_Source_File>
1000_str.mae

> <i_m_Source_File_Index>
598

> <i_lp_mmshare_version>
53156

> <s_epik_input>
W2NIXTFbY0hdW2NIXVtjSF1jKGMxMiljKFtDSDNdKWMoW25IXTIpQyg9TylbTkhdW0NASF0zW0NASF0oW0NIM10pW0NIMl1bQ0gyXVtDSDJdW0NIMl0z

> <s_epik_cmdline>
J2VwaWtfcHl0aG9uJywgJy1waHQnLCAnMC4wJywgJy1waCcsICc3LjAnLCAnLXRuJywgJzgnLCAnLW1hJywgJzUwMCcsICctaW1hZScsICc8aW5maWxlLm1hZT4nLCAnLW9tYWUnLCAnPG91dGZpbGUubWFlPic=

> <r_lp_tautomer_probability>
1

> <r_epik_Ionization_Penalty>
  0.0000

> <r_epik_Ionization_Penalty_Charging>
  0.0000

> <r_epik_Ionization_Penalty_Neutral>
  0.0000

> <r_epik_State_Penalty>
  0.0000

> <r_epik_Charging_Adjusted_Penalty>
0

> <i_epik_Tot_Q>
0

> <i_epik_Tot_abs_Q>
0

> <s_lp_Force_Field>
S-OPLS

> <r_lp_Energy>
26.159121

> <b_lp_Chiralities_Consistent>
1

> <s_lp_Variant>
GR-5-1

> <s_i_glide_gridfile>
glide-grid_1_oct_mmpl3_after_loop_refinement

> <i_i_glide_lignum>
1

> <i_i_glide_rotatable_bonds>
3

> <r_i_docking_score>
-8.55395205809026

> <r_i_glide_ligand_efficiency>
-0.427697602904513

> <r_i_glide_ligand_efficiency_sa>
-1.16094990674012

> <r_i_glide_ligand_efficiency_ln>
-2.14077207191912

> <r_glide_XP_GScore>
-8.55395205809026

> <r_i_glide_gscore>
-8.55395205809026

> <r_i_glide_evdw>
-38.4568176269531

> <r_i_glide_ecoul>
-0.993711650371552

> <r_i_glide_energy>
-39.4505292773247

> <r_i_glide_einternal>
3.87462186813354

> <r_i_glide_emodel>
-51.4731941223145

> <r_glide_XP_HBond>
0

> <r_glide_XP_PhobEn>
-2.24756940200945

> <r_glide_XP_PhobEnHB>
0

> <r_glide_XP_LowMW>
-0.5

> <r_glide_XP_RotPenal>
0.314570499084994

> <r_glide_XP_LipophilicEvdW>
-5.74948434161975

> <r_glide_XP_PhobEnPairHB>
0

> <r_glide_XP_Electro>
-0.0745283737778664

> <r_glide_XP_Sitemap>
-0.297225298955418

> <r_glide_XP_Penalties>
0.000284859187223831

> <r_glide_XP_PiStack>
0

> <r_glide_XP_HBPenal>
0

> <r_glide_XP_ExposPenal>
0

> <r_glide_XP_PiCat>
0

> <r_glide_XP_ClBr>
0

> <r_glide_XP_Zpotr>
0

> <i_i_glide_confnum>
1

> <i_i_glide_posenum>
9

> <r_i_glide_eff_state_penalty>
0

> <i_glide_XP_PoseRank>
1

> <r_i_glide_rmsd_to_input>
108.120928346084

> <s_psp_Prime_MMGBSA_Input_Structure_Hash>
bce579ad17085e927dd80ccadc2ab72f87e6ec48a470342ff1b940af

> <i_psp_number_heavy_atoms>
20

> <r_psp_MMGBSA_dG_Bind>
-40.9394065847955

> <r_psp_MMGBSA_dG_Bind_Coulomb>
-4.14784462538955

> <r_psp_MMGBSA_dG_Bind_Covalent>
0.745142539807148

> <r_psp_MMGBSA_dG_Bind_Hbond>
-0.00657060555965927

> <r_psp_MMGBSA_dG_Bind_Lipo>
-21.152623347778

> <r_psp_MMGBSA_dG_Bind_Packing>
4.9737991503207e-014

> <r_psp_MMGBSA_dG_Bind_SelfCont>
7.105427357601e-015

> <r_psp_MMGBSA_dG_Bind_Solv_GB>
23.5170871843875

> <r_psp_MMGBSA_dG_Bind_vdW>
-39.8945977303074

> <r_psp_Lig_Strain_Energy>
2.3443687207922

> <r_psp_Lig_Strain_Coulomb>
1.57410625096248

> <r_psp_Lig_Strain_Covalent>
0.745343407915311

> <r_psp_Lig_Strain_Hbond>
0

> <r_psp_Lig_Strain_Lipo>
-0.010120675895553

> <r_psp_Lig_Strain_Packing>
0

> <r_psp_Lig_Strain_SelfCont>
0

> <r_psp_Lig_Strain_Solv_GB>
-0.578768566136517

> <r_psp_Lig_Strain_vdW>
0.613808303946499

> <r_psp_Ligand_Energy>
16.6428921003678

> <r_psp_Ligand_Coulomb>
2.05872713656927

> <r_psp_Ligand_Covalent>
11.8645100835002

> <r_psp_Ligand_Hbond>
0

> <r_psp_Ligand_Lipo>
-1.48605344298646

> <r_psp_Ligand_Packing>
0

> <r_psp_Ligand_SelfCont>
0

> <r_psp_Ligand_Solv_GB>
-8.26957264543407

> <r_psp_Ligand_vdW>
12.4752809687189

> <r_psp_Complex_Energy>
-34938.0432912752

> <r_psp_Complex_Coulomb>
-26462.7275459149

> <r_psp_Complex_Covalent>
4021.76499359254

> <r_psp_Complex_Hbond>
-550.104175688741

> <r_psp_Complex_Lipo>
-2136.12190494384

> <r_psp_Complex_Packing>
-55.8446424272089

> <r_psp_Complex_SelfCont>
-40.4078915603482

> <r_psp_Complex_Solv_GB>
-5194.57681669906

> <r_psp_Complex_vdW>
-4520.02530763364

> <r_psp_Receptor_Energy>
-34913.7467767908

> <r_psp_Receptor_Coulomb>
-26460.6384284261

> <r_psp_Receptor_Covalent>
4009.15534096923

> <r_psp_Receptor_Hbond>
-550.097605083181

> <r_psp_Receptor_Lipo>
-2113.48322815308

> <r_psp_Receptor_Packing>
-55.8446424272089

> <r_psp_Receptor_SelfCont>
-40.4078915603482

> <r_psp_Receptor_Solv_GB>
-5209.82433123801

> <r_psp_Receptor_vdW>
-4492.60599087205

> <r_psp_MMGBSA_dG_Bind(NS)>
-43.2837753056374

> <r_psp_MMGBSA_dG_Bind(NS)_Coulomb>
-5.721950876341

> <r_psp_MMGBSA_dG_Bind(NS)_Covalent>
-0.000200868112187891

> <r_psp_MMGBSA_dG_Bind(NS)_Hbond>
-0.0065706055594319

> <r_psp_MMGBSA_dG_Bind(NS)_Lipo>
-21.1425026718794

> <r_psp_MMGBSA_dG_Bind(NS)_Packing>
0

> <r_psp_MMGBSA_dG_Bind(NS)_SelfCont>
0

> <r_psp_MMGBSA_dG_Bind(NS)_Solv_GB>
24.095855750521

> <r_psp_MMGBSA_dG_Bind(NS)_vdW>
-40.5084060342588

> <r_psp_Rec_Strain_Energy>
5.0931703299284e-011

> <r_psp_Rec_Strain_Coulomb>
-1.09139364212751e-011

> <r_psp_Rec_Strain_Covalent>
4.09272615797818e-012

> <r_psp_Rec_Strain_Hbond>
-2.27373675443232e-013

> <r_psp_Rec_Strain_Lipo>
-2.72848410531878e-012

> <r_psp_Rec_Strain_Packing>
4.9737991503207e-014

> <r_psp_Rec_Strain_SelfCont>
7.105427357601e-015

> <r_psp_Rec_Strain_Solv_GB>
2.72848410531878e-012

> <r_psp_Rec_Strain_vdW>
4.54747350886464e-012

> <r_psp_Prime_MMGBSA_ligand_efficiency>
-2.04697032923978

> <r_psp_Prime_MMGBSA_ligand_efficiency_sa>
-3.07045549385966

> <r_psp_Prime_MMGBSA_ligand_efficiency_ln>
-10.2457831961755

> <i_psp_ExecuteFunction_Internal_Entry_Index>
82

> <b_m_m_glide_XPvisualizer>
1

> <i_qp_#stars>
0

> <i_qp_#amine>
0

> <i_qp_#amidine>
0

> <i_qp_#acid>
0

> <i_qp_#amide>
0

> <i_qp_#rotor>
2

> <i_qp_#rtvFG>
0

> <i_qp_CNS>
1

> <r_qp_mol_MW>
   270.374

> <r_qp_dipole>
     5.657

> <r_qp_SASA>
   561.797

> <r_qp_FOSA>
   335.980

> <r_qp_FISA>
    43.387

> <r_qp_PISA>
   182.429

> <r_qp_WPSA>
     0.000

> <r_qp_volume>
   965.486

> <r_qp_donorHB>
     2.000

> <r_qp_accptHB>
     2.500

> <r_qp_dip^2/V>
   0.0331508

> <r_qp_ACxDN^.5/SA>
   0.0062933

> <r_qp_glob>
   0.8409107

> <r_qp_QPpolrz>
    32.943

> <r_qp_QPlogPC16>
     9.186

> <r_qp_QPlogPoct>
    14.972

> <r_qp_QPlogPw>
     7.558

> <r_qp_QPlogPo/w>
     3.969

> <r_qp_QPlogS>
    -5.055

> <r_qp_CIQPlogS>
    -4.074

> <r_qp_QPlogHERG>
    -4.976

> <r_qp_QPPCaco>
  3841.122

> <r_qp_QPlogBB>
     0.034

> <r_qp_QPPMDCK>
  2118.751

> <r_qp_QPlogKp>
    -1.484

> <r_qp_IP(eV)>
     8.335

> <r_qp_EA(eV)>
     0.366

> <i_qp_#metab>
1

> <r_qp_QPlogKhsa>
     0.570

> <i_qp_HumanOralAbsorption>
3

> <r_qp_PercentHumanOralAbsorption>
   100.000

> <r_qp_SAfluorine>
     0.000

> <r_qp_SAamideO>
     0.000

> <r_qp_PSA>
    45.833

> <i_qp_#NandO>
3

> <i_qp_RuleOfFive>
0

> <i_qp_RuleOfThree>
0

> <i_qp_#ringatoms>
15

> <i_qp_#in34>
0

> <i_qp_#in56>
15

> <i_qp_#noncon>
6

> <i_qp_#nonHatm>
20

> <r_qp_Jm>
0.0781582067663822

> <s_m_subgroupid>
100str_copy1

> <s_m_subgroup_title>
100str

> <b_m_subgroup_collapsed>
0

$$$$
GR-6
                    3D
 Structure written by MMmdl.
 42 44  0  0  1  0            999 V2000
   -3.2794    1.7293   -0.0000 C   0  0  0  0  0  0
   -2.1572    0.8932   -0.0000 C   0  0  0  0  0  0
   -2.2569   -0.5253    0.0000 C   0  0  0  0  0  0
   -3.5385   -1.1036    0.0000 C   0  0  0  0  0  0
   -4.6598   -0.2757    0.0000 C   0  0  0  0  0  0
   -4.5293    1.1101   -0.0000 C   0  0  0  0  0  0
   -0.9203   -1.0633    0.0000 C   0  0  0  0  0  0
   -0.0453    0.0349   -0.0000 C   0  0  0  0  0  0
   -0.8149    1.1824   -0.0000 N   0  0  0  0  0  0
   -0.6219   -2.5523    0.0000 C   0  0  0  0  0  0
    1.4088    0.0564   -0.0000 C   0  0  0  0  0  0
    1.9631    1.2859    0.0000 N   0  0  0  0  0  0
    3.3988    1.5939   -0.0000 C   0  0  1  0  0  0
    3.7839    2.4199   -1.2554 C   0  0  0  0  0  0
    3.1304    3.8214   -1.2634 C   0  0  0  0  0  0
    3.5227    4.6215   -0.0000 C   0  0  2  0  0  0
    3.1305    3.8214    1.2635 C   0  0  0  0  0  0
    3.7838    2.4200    1.2554 C   0  0  0  0  0  0
    2.0728   -0.9800   -0.0000 O   0  0  0  0  0  0
    2.9107    6.0325    0.0000 C   0  0  0  0  0  0
   -3.1921    2.8059   -0.0000 H   0  0  0  0  0  0
   -3.6586   -2.1770    0.0000 H   0  0  0  0  0  0
   -5.6463   -0.7161    0.0000 H   0  0  0  0  0  0
   -5.4198    1.7215   -0.0000 H   0  0  0  0  0  0
   -0.3990    2.1021   -0.0000 H   0  0  0  0  0  0
    0.4365   -2.8019    0.0000 H   0  0  0  0  0  0
   -1.0535   -3.0383   -0.8752 H   0  0  0  0  0  0
   -1.0536   -3.0383    0.8752 H   0  0  0  0  0  0
    1.3481    2.0854    0.0000 H   0  0  0  0  0  0
    3.9805    0.6695   -0.0000 H   0  0  0  0  0  0
    4.8691    2.5222   -1.3073 H   0  0  0  0  0  0
    3.4992    1.8757   -2.1572 H   0  0  0  0  0  0
    3.4233    4.3713   -2.1589 H   0  0  0  0  0  0
    2.0445    3.7370   -1.3320 H   0  0  0  0  0  0
    4.6104    4.7172    0.0000 H   0  0  0  0  0  0
    3.4233    4.3713    2.1589 H   0  0  0  0  0  0
    2.0445    3.7370    1.3320 H   0  0  0  0  0  0
    3.4992    1.8757    2.1572 H   0  0  0  0  0  0
    4.8692    2.5222    1.3073 H   0  0  0  0  0  0
    1.8206    5.9956   -0.0000 H   0  0  0  0  0  0
    3.2239    6.5976   -0.8785 H   0  0  0  0  0  0
    3.2239    6.5976    0.8785 H   0  0  0  0  0  0
  1  2  1  0  0  0
  1  6  2  0  0  0
  1 21  1  0  0  0
  2  3  2  0  0  0
  2  9  1  0  0  0
  3  4  1  0  0  0
  3  7  1  0  0  0
  4  5  2  0  0  0
  4 22  1  0  0  0
  5  6  1  0  0  0
  5 23  1  0  0  0
  6 24  1  0  0  0
  7  8  2  0  0  0
  7 10  1  0  0  0
  8  9  1  0  0  0
  8 11  1  0  0  0
  9 25  1  0  0  0
 10 26  1  0  0  0
 10 27  1  0  0  0
 10 28  1  0  0  0
 11 12  1  0  0  0
 11 19  2  0  0  0
 12 13  1  0  0  0
 12 29  1  0  0  0
 13 18  1  0  0  0
 13 14  1  0  0  0
 13 30  1  0  0  0
 14 15  1  0  0  0
 14 31  1  0  0  0
 14 32  1  0  0  0
 15 16  1  0  0  0
 15 33  1  0  0  0
 15 34  1  0  0  0
 16 17  1  0  0  0
 16 20  1  0  0  0
 16 35  1  0  0  0
 17 18  1  0  0  0
 17 36  1  0  0  0
 17 37  1  0  0  0
 18 38  1  0  0  0
 18 39  1  0  0  0
 20 40  1  0  0  0
 20 41  1  0  0  0
 20 42  1  0  0  0
M  END
> <s_m_entry_id>
8185

> <s_m_entry_name>
entry

> <i_f3d_flags>
0

> <s_m_job_name>
adme_1000

> <r_psp_Prime_Energy>
-34940.0934189624

> <r_psp_Prime_Solv_GB>
-5198.94955733755

> <r_psp_Prime_Coulomb>
-26471.3860962541

> <r_psp_Prime_vdW>
-4523.4282978913

> <r_psp_Prime_Covalent>
4035.55233438093

> <i_psp_model_num>
0

> <r_psp_Prime_Lipo>
-2135.52983087533

> <s_psp_Prime_Energy_Force_Field>
OPLS3e

> <s_psp_Prime_Energy_Solvent_Model>
VSGB2.1

> <r_psp_Prime_Hbond>
-550.099436997451

> <r_psp_Prime_Packing>
-55.8446424272089

> <r_psp_Prime_SelfCont>
-40.4078915603482

> <r_psp_Memb1_x>
103.457542316003

> <r_psp_Memb1_y>
39.4731108300965

> <r_psp_Memb1_z>
48.7987221124676

> <r_psp_Memb2_x>
99.8134167309003

> <r_psp_Memb2_y>
2.81176945184187

> <r_psp_Memb2_z>
23.8404289603493

> <r_psp_MembDummyRadius>
4.45

> <r_psp_Prime_Bond_Covalent>
467.391595726917

> <r_psp_Prime_Bond_SGB>
49992.5416125273

> <r_psp_Prime_Angle_Covalent>
2226.73651540184

> <r_psp_Prime_Angle_SGB>
-21644.991180766

> <r_psp_Prime_Torsion_Covalent>
1341.42422325217

> <r_psp_Prime_NB14_LJ>
4077.06177763995

> <r_psp_Prime_NB14_Lipo>
0

> <r_psp_Prime_NB14_Elec>
25553.894182228

> <r_psp_Prime_NB14_SGB>
-15622.4839565682

> <r_psp_Prime_NBShort_LJ>
-8192.6845362353

> <r_psp_Prime_NBShort_Lipo>
-2135.52983087533

> <r_psp_Prime_NBShort_Elec>
-53044.1503602425

> <r_psp_Prime_NBShort_SGB>
18022.4225771233

> <r_psp_Prime_NBLong_LJ>
-407.80553929595

> <r_psp_Prime_NBLong_Lipo>
0

> <r_psp_Prime_NBLong_Elec>
1018.87008176037

> <r_psp_Prime_NBLong_SGB>
-1173.41095088228

> <r_psp_Prime_Self_SGB>
-34773.0276587716

> <s_m_Source_Path>
F:\Dekstop_files\DAC4,5\Molecular Systems Desgn and Engineering\supplementary_str

> <s_m_Source_File>
1000_str.mae

> <i_m_Source_File_Index>
610

> <i_lp_mmshare_version>
53156

> <s_epik_input>
W2NIXTFbY0hdW2NIXVtjSF1jKGMxMiljKFtDSDNdKWMoW25IXTIpQyg9TylbTkhdW0NASF0zW0NIMl1bQ0gyXVtDQEBIXShbQ0gzXSlbQ0gyXVtDSDJdMw==

> <s_epik_cmdline>
J2VwaWtfcHl0aG9uJywgJy1waHQnLCAnMC4wJywgJy1waCcsICc3LjAnLCAnLXRuJywgJzgnLCAnLW1hJywgJzUwMCcsICctaW1hZScsICc8aW5maWxlLm1hZT4nLCAnLW9tYWUnLCAnPG91dGZpbGUubWFlPic=

> <r_lp_tautomer_probability>
1

> <r_epik_Ionization_Penalty>
  0.0000

> <r_epik_Ionization_Penalty_Charging>
  0.0000

> <r_epik_Ionization_Penalty_Neutral>
  0.0000

> <r_epik_State_Penalty>
  0.0000

> <r_epik_Charging_Adjusted_Penalty>
0

> <i_epik_Tot_Q>
0

> <i_epik_Tot_abs_Q>
0

> <s_lp_Force_Field>
S-OPLS

> <r_lp_Energy>
34.883759

> <b_lp_Chiralities_Consistent>
1

> <s_lp_Variant>
GR-6-1

> <s_i_glide_gridfile>
glide-grid_1_oct_mmpl3_after_loop_refinement

> <i_i_glide_lignum>
5

> <i_i_glide_rotatable_bonds>
3

> <r_i_docking_score>
-8.28107915429687

> <r_i_glide_ligand_efficiency>
-0.414053957714844

> <r_i_glide_ligand_efficiency_sa>
-1.1239153559197

> <r_i_glide_ligand_efficiency_ln>
-2.07248098405034

> <r_glide_XP_GScore>
-8.28107915429687

> <r_i_glide_gscore>
-8.28107915429687

> <r_i_glide_evdw>
-38.5055694580078

> <r_i_glide_ecoul>
0.343457579612732

> <r_i_glide_energy>
-38.1621118783951

> <r_i_glide_einternal>
1.12708747386932

> <r_i_glide_emodel>
-51.5746150523322

> <r_glide_XP_HBond>
0

> <r_glide_XP_PhobEn>
-2.558668618425

> <r_glide_XP_PhobEnHB>
0

> <r_glide_XP_LowMW>
-0.5

> <r_glide_XP_RotPenal>
0.314570499084994

> <r_glide_XP_LipophilicEvdW>
-5.16511997899426

> <r_glide_XP_PhobEnPairHB>
0

> <r_glide_XP_Electro>
0.0257593184709549

> <r_glide_XP_Sitemap>
-0.4

> <r_glide_XP_Penalties>
0.00237962556643707

> <r_glide_XP_PiStack>
0

> <r_glide_XP_HBPenal>
0

> <r_glide_XP_ExposPenal>
0

> <r_glide_XP_PiCat>
0

> <r_glide_XP_ClBr>
0

> <r_glide_XP_Zpotr>
0

> <i_i_glide_confnum>
1

> <i_i_glide_posenum>
16

> <r_i_glide_eff_state_penalty>
0

> <i_glide_XP_PoseRank>
1

> <r_i_glide_rmsd_to_input>
108.769835942052

> <s_psp_Prime_MMGBSA_Input_Structure_Hash>
53091072d382a02838fa9506b469272e70f7a64cceb9d1c94b504db7

> <i_psp_number_heavy_atoms>
20

> <r_psp_MMGBSA_dG_Bind>
-42.4312590523768

> <r_psp_MMGBSA_dG_Bind_Coulomb>
1.65583630429319

> <r_psp_MMGBSA_dG_Bind_Covalent>
3.80475387179831

> <r_psp_MMGBSA_dG_Bind_Hbond>
-0.00183191427004203

> <r_psp_MMGBSA_dG_Bind_Lipo>
-20.4215069829561

> <r_psp_MMGBSA_dG_Bind_Packing>
4.9737991503207e-014

> <r_psp_MMGBSA_dG_Bind_SelfCont>
7.105427357601e-015

> <r_psp_MMGBSA_dG_Bind_Solv_GB>
15.6885138573562

> <r_psp_MMGBSA_dG_Bind_vdW>
-43.1570241886629

> <r_psp_Lig_Strain_Energy>
4.2093386922966

> <r_psp_Lig_Strain_Coulomb>
-0.238179945955224

> <r_psp_Lig_Strain_Covalent>
3.80495473990869

> <r_psp_Lig_Strain_Hbond>
0

> <r_psp_Lig_Strain_Lipo>
0.0385280810851725

> <r_psp_Lig_Strain_Packing>
0

> <r_psp_Lig_Strain_SelfCont>
0

> <r_psp_Lig_Strain_Solv_GB>
0.195344228079506

> <r_psp_Lig_Strain_vdW>
0.408691589178487

> <r_psp_Ligand_Energy>
16.084616880827

> <r_psp_Ligand_Coulomb>
-12.4035041323038

> <r_psp_Ligand_Covalent>
22.5922395399045

> <r_psp_Ligand_Hbond>
0

> <r_psp_Ligand_Lipo>
-1.6250957392896

> <r_psp_Ligand_Packing>
0

> <r_psp_Ligand_SelfCont>
0

> <r_psp_Ligand_Solv_GB>
-4.81373995689614

> <r_psp_Ligand_vdW>
12.3347171694121

> <r_psp_Complex_Energy>
-34940.0934189624

> <r_psp_Complex_Coulomb>
-26471.3860962541

> <r_psp_Complex_Covalent>
4035.55233438093

> <r_psp_Complex_Hbond>
-550.099436997451

> <r_psp_Complex_Lipo>
-2135.52983087533

> <r_psp_Complex_Packing>
-55.8446424272089

> <r_psp_Complex_SelfCont>
-40.4078915603482

> <r_psp_Complex_Solv_GB>
-5198.94955733755

> <r_psp_Complex_vdW>
-4523.4282978913

> <r_psp_Receptor_Energy>
-34913.7467767908

> <r_psp_Receptor_Coulomb>
-26460.6384284261

> <r_psp_Receptor_Covalent>
4009.15534096923

> <r_psp_Receptor_Hbond>
-550.097605083181

> <r_psp_Receptor_Lipo>
-2113.48322815308

> <r_psp_Receptor_Packing>
-55.8446424272089

> <r_psp_Receptor_SelfCont>
-40.4078915603482

> <r_psp_Receptor_Solv_GB>
-5209.82433123801

> <r_psp_Receptor_vdW>
-4492.60599087205

> <r_psp_MMGBSA_dG_Bind(NS)>
-46.6405977447212

> <r_psp_MMGBSA_dG_Bind(NS)_Coulomb>
1.89401625025857

> <r_psp_MMGBSA_dG_Bind(NS)_Covalent>
-0.000200868114461628

> <r_psp_MMGBSA_dG_Bind(NS)_Hbond>
-0.00183191426981466

> <r_psp_MMGBSA_dG_Bind(NS)_Lipo>
-20.4600350640385

> <r_psp_MMGBSA_dG_Bind(NS)_Packing>
0

> <r_psp_MMGBSA_dG_Bind(NS)_SelfCont>
0

> <r_psp_MMGBSA_dG_Bind(NS)_Solv_GB>
15.4931696292742

> <r_psp_MMGBSA_dG_Bind(NS)_vdW>
-43.565715777846

> <r_psp_Rec_Strain_Energy>
5.0931703299284e-011

> <r_psp_Rec_Strain_Coulomb>
-1.09139364212751e-011

> <r_psp_Rec_Strain_Covalent>
4.09272615797818e-012

> <r_psp_Rec_Strain_Hbond>
-2.27373675443232e-013

> <r_psp_Rec_Strain_Lipo>
-2.72848410531878e-012

> <r_psp_Rec_Strain_Packing>
4.9737991503207e-014

> <r_psp_Rec_Strain_SelfCont>
7.105427357601e-015

> <r_psp_Rec_Strain_Solv_GB>
2.72848410531878e-012

> <r_psp_Rec_Strain_vdW>
4.54747350886464e-012

> <r_psp_Prime_MMGBSA_ligand_efficiency>
-2.12156295261884

> <r_psp_Prime_MMGBSA_ligand_efficiency_sa>
-3.18234442892826

> <r_psp_Prime_MMGBSA_ligand_efficiency_ln>
-10.6191446642236

> <i_psp_ExecuteFunction_Internal_Entry_Index>
101

> <b_m_m_glide_XPvisualizer>
1

> <i_qp_#stars>
0

> <i_qp_#amine>
0

> <i_qp_#amidine>
0

> <i_qp_#acid>
0

> <i_qp_#amide>
0

> <i_qp_#rotor>
2

> <i_qp_#rtvFG>
0

> <i_qp_CNS>
1

> <r_qp_mol_MW>
   270.374

> <r_qp_dipole>
     5.989

> <r_qp_SASA>
   564.244

> <r_qp_FOSA>
   335.564

> <r_qp_FISA>
    44.683

> <r_qp_PISA>
   183.997

> <r_qp_WPSA>
     0.000

> <r_qp_volume>
   971.030

> <r_qp_donorHB>
     2.000

> <r_qp_accptHB>
     2.500

> <r_qp_dip^2/V>
   0.0369356

> <r_qp_ACxDN^.5/SA>
   0.0062660

> <r_qp_glob>
   0.8404654

> <r_qp_QPpolrz>
    33.180

> <r_qp_QPlogPC16>
     9.260

> <r_qp_QPlogPoct>
    15.116

> <r_qp_QPlogPw>
     7.583

> <r_qp_QPlogPo/w>
     3.997

> <r_qp_QPlogS>
    -5.098

> <r_qp_CIQPlogS>
    -4.074

> <r_qp_QPlogHERG>
    -4.991

> <r_qp_QPPCaco>
  3733.992

> <r_qp_QPlogBB>
     0.021

> <r_qp_QPPMDCK>
  2054.952

> <r_qp_QPlogKp>
    -1.503

> <r_qp_IP(eV)>
     8.330

> <r_qp_EA(eV)>
     0.384

> <i_qp_#metab>
1

> <r_qp_QPlogKhsa>
     0.585

> <i_qp_HumanOralAbsorption>
3

> <r_qp_PercentHumanOralAbsorption>
   100.000

> <r_qp_SAfluorine>
     0.000

> <r_qp_SAamideO>
     0.000

> <r_qp_PSA>
    46.307

> <i_qp_#NandO>
3

> <i_qp_RuleOfFive>
0

> <i_qp_RuleOfThree>
0

> <i_qp_#ringatoms>
15

> <i_qp_#in34>
0

> <i_qp_#in56>
15

> <i_qp_#noncon>
6

> <i_qp_#nonHatm>
20

> <r_qp_Jm>
0.06776046561743

> <s_m_subgroupid>
100str_copy1

> <s_m_subgroup_title>
100str

> <b_m_subgroup_collapsed>
0

$$$$
GR-13
                    3D
 Structure written by MMmdl.
 55 58  0  0  1  0            999 V2000
   -3.4425    1.7274   -0.3440 C   0  0  0  0  0  0
   -2.3805    0.8253   -0.2162 C   0  0  0  0  0  0
   -1.0356    1.2465   -0.0160 C   0  0  0  0  0  0
   -0.7723    2.6256    0.0577 C   0  0  0  0  0  0
   -1.8275    3.5279   -0.0650 C   0  0  0  0  0  0
   -3.1323    3.0848   -0.2620 C   0  0  0  0  0  0
   -0.2118    0.0665    0.0627 C   0  0  0  0  0  0
   -1.0745   -1.0308   -0.0627 C   0  0  0  0  0  0
   -2.3534   -0.5481   -0.2501 N   0  0  0  0  0  0
    1.2919    0.0732    0.2675 C   0  0  0  0  0  0
    1.9495   -0.0807   -1.1111 N   0  3  0  0  0  0
   -0.7437   -2.4426   -0.0924 C   0  0  0  0  0  0
   -1.7890   -3.2798    0.0684 N   0  0  0  0  0  0
   -1.7162   -4.7421    0.1043 C   0  0  0  0  0  0
   -1.0155   -5.3292    1.3593 C   0  0  0  0  0  0
   -1.0097   -6.8699    1.4039 C   0  0  0  0  0  0
   -2.4094   -7.4658    1.1850 C   0  0  0  0  0  0
   -3.0298   -6.9592   -0.1269 C   0  0  0  0  0  0
   -3.0758   -5.4199   -0.1933 C   0  0  0  0  0  0
    0.4149   -2.8266   -0.2606 O   0  0  0  0  0  0
    4.0880   -0.3543   -2.4512 C   0  0  0  0  0  0
    4.2388   -1.6411   -2.9756 C   0  0  0  0  0  0
    4.8029   -1.8154   -4.2366 C   0  0  0  0  0  0
    5.2204   -0.7036   -4.9654 C   0  0  0  0  0  0
    5.0811    0.5810   -4.4440 C   0  0  0  0  0  0
    4.5168    0.7565   -3.1830 C   0  0  0  0  0  0
    3.4818   -0.1668   -1.0716 C   0  0  0  0  0  0
   -4.4595    1.3976   -0.4977 H   0  0  0  0  0  0
    0.2331    2.9899    0.2086 H   0  0  0  0  0  0
   -1.6303    4.5886   -0.0068 H   0  0  0  0  0  0
   -3.9255    3.8126   -0.3539 H   0  0  0  0  0  0
   -3.1408   -1.1644   -0.3899 H   0  0  0  0  0  0
    1.6853    1.0035    0.6793 H   0  0  0  0  0  0
    1.6601   -0.7664    0.8586 H   0  0  0  0  0  0
   -2.6891   -2.8822    0.2925 H   0  0  0  0  0  0
   -1.0855   -5.0372   -0.7385 H   0  0  0  0  0  0
    0.0121   -4.9698    1.4269 H   0  0  0  0  0  0
   -1.5337   -4.9709    2.2503 H   0  0  0  0  0  0
   -0.3317   -7.2501    0.6381 H   0  0  0  0  0  0
   -0.6072   -7.2106    2.3588 H   0  0  0  0  0  0
   -2.3524   -8.5549    1.1733 H   0  0  0  0  0  0
   -3.0560   -7.2022    2.0234 H   0  0  0  0  0  0
   -2.4520   -7.3399   -0.9706 H   0  0  0  0  0  0
   -4.0357   -7.3649   -0.2421 H   0  0  0  0  0  0
   -3.8080   -5.0782    0.5402 H   0  0  0  0  0  0
   -3.4435   -5.1136   -1.1739 H   0  0  0  0  0  0
    3.9161   -2.5043   -2.4112 H   0  0  0  0  0  0
    4.9167   -2.8079   -4.6474 H   0  0  0  0  0  0
    5.6580   -0.8391   -5.9436 H   0  0  0  0  0  0
    5.4105    1.4366   -5.0152 H   0  0  0  0  0  0
    4.4116    1.7532   -2.7796 H   0  0  0  0  0  0
    3.8078    0.7595   -0.5950 H   0  0  0  0  0  0
    3.7036   -1.0067   -0.4104 H   0  0  0  0  0  0
    1.5954   -0.9247   -1.5393 H   0  0  0  0  0  0
    1.6801    0.6995   -1.6931 H   0  0  0  0  0  0
  1  2  1  0  0  0
  1  6  2  0  0  0
  1 28  1  0  0  0
  2  3  2  0  0  0
  2  9  1  0  0  0
  3  4  1  0  0  0
  3  7  1  0  0  0
  4  5  2  0  0  0
  4 29  1  0  0  0
  5  6  1  0  0  0
  5 30  1  0  0  0
  6 31  1  0  0  0
  7  8  2  0  0  0
  7 10  1  0  0  0
  8  9  1  0  0  0
  8 12  1  0  0  0
  9 32  1  0  0  0
 10 11  1  0  0  0
 10 33  1  0  0  0
 10 34  1  0  0  0
 11 27  1  0  0  0
 11 54  1  0  0  0
 11 55  1  0  0  0
 12 13  1  0  0  0
 12 20  2  0  0  0
 13 14  1  0  0  0
 13 35  1  0  0  0
 14 19  1  0  0  0
 14 15  1  0  0  0
 14 36  1  0  0  0
 15 16  1  0  0  0
 15 37  1  0  0  0
 15 38  1  0  0  0
 16 17  1  0  0  0
 16 39  1  0  0  0
 16 40  1  0  0  0
 17 18  1  0  0  0
 17 41  1  0  0  0
 17 42  1  0  0  0
 18 19  1  0  0  0
 18 43  1  0  0  0
 18 44  1  0  0  0
 19 45  1  0  0  0
 19 46  1  0  0  0
 21 26  1  0  0  0
 21 22  2  0  0  0
 21 27  1  0  0  0
 22 23  1  0  0  0
 22 47  1  0  0  0
 23 24  2  0  0  0
 23 48  1  0  0  0
 24 25  1  0  0  0
 24 49  1  0  0  0
 25 26  2  0  0  0
 25 50  1  0  0  0
 26 51  1  0  0  0
 27 52  1  0  0  0
 27 53  1  0  0  0
M  CHG  1  11   1
M  END
> <s_m_entry_id>
8186

> <s_m_entry_name>
entry

> <i_f3d_flags>
0

> <s_m_job_name>
adme_1000

> <r_psp_Prime_Energy>
-34941.2653607464

> <r_psp_Prime_Solv_GB>
-5265.24738041892

> <r_psp_Prime_Coulomb>
-26398.0472781083

> <r_psp_Prime_vdW>
-4521.70294301224

> <r_psp_Prime_Covalent>
4038.6333305019

> <i_psp_model_num>
0

> <r_psp_Prime_Lipo>
-2148.55084217334

> <s_psp_Prime_Energy_Force_Field>
OPLS3e

> <s_psp_Prime_Energy_Solvent_Model>
VSGB2.1

> <r_psp_Prime_Hbond>
-550.097713489002

> <r_psp_Prime_Packing>
-55.8446424860814

> <r_psp_Prime_SelfCont>
-40.4078915603482

> <r_psp_Memb1_x>
103.457542316003

> <r_psp_Memb1_y>
39.4731108300965

> <r_psp_Memb1_z>
48.7987221124676

> <r_psp_Memb2_x>
99.8134167309003

> <r_psp_Memb2_y>
2.81176945184187

> <r_psp_Memb2_z>
23.8404289603493

> <r_psp_MembDummyRadius>
4.45

> <r_psp_Prime_Bond_Covalent>
467.641325616836

> <r_psp_Prime_Bond_SGB>
49977.9220808417

> <r_psp_Prime_Angle_Covalent>
2227.12565768845

> <r_psp_Prime_Angle_SGB>
-21641.3300360498

> <r_psp_Prime_Torsion_Covalent>
1343.86634719662

> <r_psp_Prime_NB14_LJ>
4086.28032789227

> <r_psp_Prime_NB14_Lipo>
0

> <r_psp_Prime_NB14_Elec>
25565.5703872017

> <r_psp_Prime_NB14_SGB>
-15608.064124936

> <r_psp_Prime_NBShort_LJ>
-8200.46696107385

> <r_psp_Prime_NBShort_Lipo>
-2148.55084217334

> <r_psp_Prime_NBShort_Elec>
-53034.0109233894

> <r_psp_Prime_NBShort_SGB>
17993.9414475049

> <r_psp_Prime_NBLong_LJ>
-407.516309830665

> <r_psp_Prime_NBLong_Lipo>
0

> <r_psp_Prime_NBLong_Elec>
1070.39325807938

> <r_psp_Prime_NBLong_SGB>
-1223.60714532714

> <r_psp_Prime_Self_SGB>
-34764.1096024525

> <s_m_Source_Path>
F:\Dekstop_files\DAC4,5\Molecular Systems Desgn and Engineering\supplementary_str

> <s_m_Source_File>
1000_str.mae

> <i_m_Source_File_Index>
862

> <i_lp_mmshare_version>
53156

> <s_epik_input>
W2NIXTFbY0hdW2NIXVtjSF1bY0hdYzFbQ0gyXVtOSF1bQ0gyXWMoYyhjMjMpW2NIXVtjSF1bY0hdW2NIXTIpYyhbbkhdMylDKD1PKVtOSF1bQ0hdNFtDSDJdW0NIMl1bQ0gyXVtDSDJdW0NIMl00

> <s_epik_cmdline>
J2VwaWtfcHl0aG9uJywgJy1waHQnLCAnMC4wJywgJy1waCcsICc3LjAnLCAnLXRuJywgJzgnLCAnLW1hJywgJzUwMCcsICctaW1hZScsICc8aW5maWxlLm1hZT4nLCAnLW9tYWUnLCAnPG91dGZpbGUubWFlPic=

> <r_epik_Ionization_Penalty>
  0.0879

> <r_epik_Ionization_Penalty_Charging>
  0.0879

> <r_epik_Ionization_Penalty_Neutral>
  0.0000

> <r_epik_State_Penalty>
  0.0783

> <r_epik_Charging_Adjusted_Penalty>
0.16621511207091

> <i_epik_Tot_Q>
1

> <i_epik_Tot_abs_Q>
1

> <s_lp_Force_Field>
S-OPLS

> <r_lp_Energy>
42.990421

> <b_lp_Chiralities_Consistent>
1

> <s_lp_Variant>
GR-13-1

> <s_i_glide_gridfile>
glide-grid_1_oct_mmpl3_after_loop_refinement

> <i_i_glide_lignum>
9

> <i_i_glide_rotatable_bonds>
7

> <r_i_docking_score>
-7.76957408746862

> <r_i_glide_ligand_efficiency>
-0.287762003239579

> <r_i_glide_ligand_efficiency_sa>
-0.863286008770319

> <r_i_glide_ligand_efficiency_ln>
-1.80862875612297

> <r_glide_XP_GScore>
-7.84787408746862

> <r_i_glide_gscore>
-7.84787408746862

> <r_i_glide_evdw>
-39.7540130615234

> <r_i_glide_ecoul>
-0.679929196834564

> <r_i_glide_energy>
-40.433942258358

> <r_i_glide_einternal>
3.87872505187988

> <r_i_glide_emodel>
-67.6460815089524

> <r_glide_XP_HBond>
0

> <r_glide_XP_PhobEn>
-2.7

> <r_glide_XP_PhobEnHB>
0

> <r_glide_XP_LowMW>
-0.291706933333333

> <r_glide_XP_RotPenal>
0.375791225104382

> <r_glide_XP_LipophilicEvdW>
-7.81045822621872

> <r_glide_XP_PhobEnPairHB>
0

> <r_glide_XP_Electro>
-0.0509946897625923

> <r_glide_XP_Sitemap>
-0.370523308557514

> <r_glide_XP_Penalties>
3.00001784529916

> <r_glide_XP_PiStack>
0

> <r_glide_XP_HBPenal>
0

> <r_glide_XP_ExposPenal>
0

> <r_glide_XP_PiCat>
0

> <r_glide_XP_ClBr>
0

> <r_glide_XP_Zpotr>
0

> <i_i_glide_confnum>
1

> <i_i_glide_posenum>
143

> <r_i_glide_eff_state_penalty>
0.0783

> <i_glide_XP_PoseRank>
1

> <r_i_glide_rmsd_to_input>
112.060859802965

> <s_psp_Prime_MMGBSA_Input_Structure_Hash>
91f734e1470177f158abe91f43157466a8fb2f0708555109d2a279f9

> <i_psp_number_heavy_atoms>
27

> <r_psp_MMGBSA_dG_Bind>
-53.066610691305

> <r_psp_MMGBSA_dG_Bind_Coulomb>
50.9026557964862

> <r_psp_MMGBSA_dG_Bind_Covalent>
5.73445893146845

> <r_psp_MMGBSA_dG_Bind_Hbond>
-0.000108405820924418

> <r_psp_MMGBSA_dG_Bind_Lipo>
-31.1075415158225

> <r_psp_MMGBSA_dG_Bind_Packing>
-5.88725299621728e-008

> <r_psp_MMGBSA_dG_Bind_SelfCont>
7.105427357601e-015

> <r_psp_MMGBSA_dG_Bind_Solv_GB>
-33.570793602561

> <r_psp_MMGBSA_dG_Bind_vdW>
-45.0252818362369

> <r_psp_Lig_Strain_Energy>
7.62949959741863

> <r_psp_Lig_Strain_Coulomb>
-2.76298566017301

> <r_psp_Lig_Strain_Covalent>
5.73465979958044

> <r_psp_Lig_Strain_Hbond>
0

> <r_psp_Lig_Strain_Lipo>
0.828733994349824

> <r_psp_Lig_Strain_Packing>
0

> <r_psp_Lig_Strain_SelfCont>
0

> <r_psp_Lig_Strain_Solv_GB>
1.29511070942195

> <r_psp_Lig_Strain_vdW>
2.53398075423941

> <r_psp_Ligand_Energy>
25.5480267357545

> <r_psp_Ligand_Coulomb>
11.6884945213015

> <r_psp_Ligand_Covalent>
23.7435306012028

> <r_psp_Ligand_Hbond>
0

> <r_psp_Ligand_Lipo>
-3.96007250444013

> <r_psp_Ligand_Packing>
0

> <r_psp_Ligand_SelfCont>
0

> <r_psp_Ligand_Solv_GB>
-21.8522555783537

> <r_psp_Ligand_vdW>
15.928329696044

> <r_psp_Complex_Energy>
-34941.2653607464

> <r_psp_Complex_Coulomb>
-26398.0472781083

> <r_psp_Complex_Covalent>
4038.6333305019

> <r_psp_Complex_Hbond>
-550.097713489002

> <r_psp_Complex_Lipo>
-2148.55084217334

> <r_psp_Complex_Packing>
-55.8446424860814

> <r_psp_Complex_SelfCont>
-40.4078915603482

> <r_psp_Complex_Solv_GB>
-5265.24738041892

> <r_psp_Complex_vdW>
-4521.70294301224

> <r_psp_Receptor_Energy>
-34913.7467767908

> <r_psp_Receptor_Coulomb>
-26460.6384284261

> <r_psp_Receptor_Covalent>
4009.15534096923

> <r_psp_Receptor_Hbond>
-550.097605083181

> <r_psp_Receptor_Lipo>
-2113.48322815308

> <r_psp_Receptor_Packing>
-55.8446424272089

> <r_psp_Receptor_SelfCont>
-40.4078915603482

> <r_psp_Receptor_Solv_GB>
-5209.82433123801

> <r_psp_Receptor_vdW>
-4492.60599087205

> <r_psp_MMGBSA_dG_Bind(NS)>
-60.6961102887726

> <r_psp_MMGBSA_dG_Bind(NS)_Coulomb>
53.6656414566714

> <r_psp_MMGBSA_dG_Bind(NS)_Covalent>
-0.00020086811582587

> <r_psp_MMGBSA_dG_Bind(NS)_Hbond>
-0.000108405820697044

> <r_psp_MMGBSA_dG_Bind(NS)_Lipo>
-31.9362755101697

> <r_psp_MMGBSA_dG_Bind(NS)_Packing>
-5.88725797001644e-008

> <r_psp_MMGBSA_dG_Bind(NS)_SelfCont>
0

> <r_psp_MMGBSA_dG_Bind(NS)_Solv_GB>
-34.865904311986

> <r_psp_MMGBSA_dG_Bind(NS)_vdW>
-47.559262590481

> <r_psp_Rec_Strain_Energy>
5.0931703299284e-011

> <r_psp_Rec_Strain_Coulomb>
-1.09139364212751e-011

> <r_psp_Rec_Strain_Covalent>
4.09272615797818e-012

> <r_psp_Rec_Strain_Hbond>
-2.27373675443232e-013

> <r_psp_Rec_Strain_Lipo>
-2.72848410531878e-012

> <r_psp_Rec_Strain_Packing>
4.9737991503207e-014

> <r_psp_Rec_Strain_SelfCont>
7.105427357601e-015

> <r_psp_Rec_Strain_Solv_GB>
2.72848410531878e-012

> <r_psp_Rec_Strain_vdW>
4.54747350886464e-012

> <r_psp_Prime_MMGBSA_ligand_efficiency>
-1.96543002560389

> <r_psp_Prime_MMGBSA_ligand_efficiency_sa>
-2.94814503840583

> <r_psp_Prime_MMGBSA_ligand_efficiency_ln>
-12.3530320974836

> <i_psp_ExecuteFunction_Internal_Entry_Index>
143

> <b_m_m_glide_XPvisualizer>
1

> <i_qp_#stars>
0

> <i_qp_#amine>
1

> <i_qp_#amidine>
0

> <i_qp_#acid>
0

> <i_qp_#amide>
0

> <i_qp_#rotor>
6

> <i_qp_#rtvFG>
0

> <i_qp_CNS>
1

> <r_qp_mol_MW>
   361.486

> <r_qp_dipole>
     6.173

> <r_qp_SASA>
   727.108

> <r_qp_FOSA>
   298.527

> <r_qp_FISA>
    49.197

> <r_qp_PISA>
   379.384

> <r_qp_WPSA>
     0.000

> <r_qp_volume>
  1264.736

> <r_qp_donorHB>
     3.000

> <r_qp_accptHB>
     4.000

> <r_qp_dip^2/V>
   0.0301326

> <r_qp_ACxDN^.5/SA>
   0.0095284

> <r_qp_glob>
   0.7778562

> <r_qp_QPpolrz>
    44.231

> <r_qp_QPlogPC16>
    13.777

> <r_qp_QPlogPoct>
    21.186

> <r_qp_QPlogPw>
    11.395

> <r_qp_QPlogPo/w>
     4.698

> <r_qp_QPlogS>
    -5.453

> <r_qp_CIQPlogS>
    -4.568

> <r_qp_QPlogHERG>
    -7.662

> <r_qp_QPPCaco>
   843.844

> <r_qp_QPlogBB>
     0.058

> <r_qp_QPPMDCK>
   455.541

> <r_qp_QPlogKp>
    -2.576

> <r_qp_IP(eV)>
     8.410

> <r_qp_EA(eV)>
     0.416

> <i_qp_#metab>
3

> <r_qp_QPlogKhsa>
     0.824

> <i_qp_HumanOralAbsorption>
3

> <r_qp_PercentHumanOralAbsorption>
   100.000

> <r_qp_SAfluorine>
     0.000

> <r_qp_SAamideO>
     0.000

> <r_qp_PSA>
    61.680

> <i_qp_#NandO>
4

> <i_qp_RuleOfFive>
0

> <i_qp_RuleOfThree>
0

> <i_qp_#ringatoms>
21

> <i_qp_#in34>
0

> <i_qp_#in56>
21

> <i_qp_#noncon>
6

> <i_qp_#nonHatm>
27

> <r_qp_Jm>
0.00338019155425328

> <s_m_subgroupid>
100str_copy1

> <s_m_subgroup_title>
100str

> <b_m_subgroup_collapsed>
0

$$$$
GR-14
                    3D
 Structure written by MMmdl.
 49 51  0  0  1  0            999 V2000
   -3.3457    1.6891   -0.1121 C   0  0  0  0  0  0
   -2.2736    0.7899   -0.0960 C   0  0  0  0  0  0
   -0.9190    1.2132    0.0141 C   0  0  0  0  0  0
   -0.6557    2.5908    0.1095 C   0  0  0  0  0  0
   -1.7205    3.4901    0.0954 C   0  0  0  0  0  0
   -3.0350    3.0453   -0.0128 C   0  0  0  0  0  0
   -0.0872    0.0366   -0.0043 C   0  0  0  0  0  0
   -0.9519   -1.0616   -0.1050 C   0  0  0  0  0  0
   -2.2435   -0.5816   -0.1772 N   0  0  0  0  0  0
    1.4269    0.0473    0.0964 C   0  0  0  0  0  0
    1.9952   -0.0184   -1.3303 N   0  3  0  0  0  0
   -0.6167   -2.4686   -0.2127 C   0  0  0  0  0  0
   -1.6399   -3.3216    0.0002 N   0  0  0  0  0  0
   -1.5633   -4.7831   -0.0678 C   0  0  0  0  0  0
   -2.7301   -5.4865    0.6674 C   0  0  0  0  0  0
   -2.6743   -7.0253    0.5890 C   0  0  0  0  0  0
   -2.5097   -7.5306   -0.8535 C   0  0  0  0  0  0
   -1.2776   -6.9036   -1.5249 C   0  0  0  0  0  0
   -1.3118   -5.3632   -1.4859 C   0  0  0  0  0  0
    0.5313   -2.8357   -0.4693 O   0  0  0  0  0  0
    3.5288   -0.0702   -1.4082 C   0  0  0  0  0  0
    4.1110   -1.3625   -0.8682 C   0  0  0  0  0  0
    4.8986   -1.4511    0.2150 C   0  0  0  0  0  0
   -4.3707    1.3583   -0.1963 H   0  0  0  0  0  0
    0.3571    2.9565    0.1936 H   0  0  0  0  0  0
   -1.5233    4.5498    0.1697 H   0  0  0  0  0  0
   -3.8355    3.7709   -0.0201 H   0  0  0  0  0  0
   -3.0369   -1.1978   -0.2776 H   0  0  0  0  0  0
    1.8392    0.9570    0.5350 H   0  0  0  0  0  0
    1.8363   -0.8181    0.6180 H   0  0  0  0  0  0
   -2.5615   -2.9387    0.1491 H   0  0  0  0  0  0
   -0.6790   -5.0631    0.5106 H   0  0  0  0  0  0
   -2.7547   -5.1808    1.7145 H   0  0  0  0  0  0
   -3.6729   -5.1646    0.2221 H   0  0  0  0  0  0
   -1.8419   -7.3869    1.1948 H   0  0  0  0  0  0
   -3.5762   -7.4516    1.0304 H   0  0  0  0  0  0
   -2.4233   -8.6178   -0.8595 H   0  0  0  0  0  0
   -3.4040   -7.2923   -1.4313 H   0  0  0  0  0  0
   -0.3750   -7.2562   -1.0234 H   0  0  0  0  0  0
   -1.2025   -7.2466   -2.5575 H   0  0  0  0  0  0
   -2.1098   -5.0271   -2.1499 H   0  0  0  0  0  0
   -0.3780   -4.9791   -1.8981 H   0  0  0  0  0  0
    3.7531    0.0412   -2.4695 H   0  0  0  0  0  0
    3.8784    0.8136   -0.8715 H   0  0  0  0  0  0
    3.8660   -2.2625   -1.4144 H   0  0  0  0  0  0
    5.1702   -0.5759    0.7874 H   0  0  0  0  0  0
    5.2834   -2.4051    0.5448 H   0  0  0  0  0  0
    1.6232   -0.8379   -1.7895 H   0  0  0  0  0  0
    1.6730    0.7929   -1.8383 H   0  0  0  0  0  0
  1  2  2  0  0  0
  1  6  1  0  0  0
  1 24  1  0  0  0
  2  3  1  0  0  0
  2  9  1  0  0  0
  3  4  2  0  0  0
  3  7  1  0  0  0
  4  5  1  0  0  0
  4 25  1  0  0  0
  5  6  2  0  0  0
  5 26  1  0  0  0
  6 27  1  0  0  0
  7  8  2  0  0  0
  7 10  1  0  0  0
  8  9  1  0  0  0
  8 12  1  0  0  0
  9 28  1  0  0  0
 10 11  1  0  0  0
 10 29  1  0  0  0
 10 30  1  0  0  0
 11 21  1  0  0  0
 11 48  1  0  0  0
 11 49  1  0  0  0
 12 13  1  0  0  0
 12 20  2  0  0  0
 13 14  1  0  0  0
 13 31  1  0  0  0
 14 15  1  0  0  0
 14 19  1  0  0  0
 14 32  1  0  0  0
 15 16  1  0  0  0
 15 33  1  0  0  0
 15 34  1  0  0  0
 16 17  1  0  0  0
 16 35  1  0  0  0
 16 36  1  0  0  0
 17 18  1  0  0  0
 17 37  1  0  0  0
 17 38  1  0  0  0
 18 19  1  0  0  0
 18 39  1  0  0  0
 18 40  1  0  0  0
 19 41  1  0  0  0
 19 42  1  0  0  0
 21 22  1  0  0  0
 21 43  1  0  0  0
 21 44  1  0  0  0
 22 23  2  0  0  0
 22 45  1  0  0  0
 23 46  1  0  0  0
 23 47  1  0  0  0
M  CHG  1  11   1
M  END
> <s_m_entry_id>
8187

> <s_m_entry_name>
entry

> <i_f3d_flags>
0

> <s_m_job_name>
adme_1000

> <r_psp_Prime_Energy>
-34944.2198335958

> <r_psp_Prime_Solv_GB>
-5282.82617861472

> <r_psp_Prime_Coulomb>
-26386.2173075582

> <r_psp_Prime_vdW>
-4525.31726159965

> <r_psp_Prime_Covalent>
4037.29151439382

> <i_psp_model_num>
0

> <r_psp_Prime_Lipo>
-2138.35066718779

> <s_psp_Prime_Energy_Force_Field>
OPLS3e

> <s_psp_Prime_Energy_Solvent_Model>
VSGB2.1

> <r_psp_Prime_Hbond>
-550.816287799627

> <r_psp_Prime_Packing>
-57.5757536692337

> <r_psp_Prime_SelfCont>
-40.4078915603482

> <r_psp_Memb1_x>
103.457542316003

> <r_psp_Memb1_y>
39.4731108300965

> <r_psp_Memb1_z>
48.7987221124676

> <r_psp_Memb2_x>
99.8134167309003

> <r_psp_Memb2_y>
2.81176945184187

> <r_psp_Memb2_z>
23.8404289603493

> <r_psp_MembDummyRadius>
4.45

> <r_psp_Prime_Bond_Covalent>
467.693876796887

> <r_psp_Prime_Bond_SGB>
49985.9622949943

> <r_psp_Prime_Angle_Covalent>
2225.42116086852

> <r_psp_Prime_Angle_SGB>
-21642.0777847109

> <r_psp_Prime_Torsion_Covalent>
1344.17647672841

> <r_psp_Prime_NB14_LJ>
4077.61900223664

> <r_psp_Prime_NB14_Lipo>
0

> <r_psp_Prime_NB14_Elec>
25568.854941233

> <r_psp_Prime_NB14_SGB>
-15617.3088797961

> <r_psp_Prime_NBShort_LJ>
-8195.53879905393

> <r_psp_Prime_NBShort_Lipo>
-2138.35066718779

> <r_psp_Prime_NBShort_Elec>
-53017.5499859173

> <r_psp_Prime_NBShort_SGB>
17983.232859351

> <r_psp_Prime_NBLong_LJ>
-407.397464782362

> <r_psp_Prime_NBLong_Lipo>
0

> <r_psp_Prime_NBLong_Elec>
1062.47773712613

> <r_psp_Prime_NBLong_SGB>
-1223.27417192178

> <r_psp_Prime_Self_SGB>
-34769.3604965312

> <s_m_Source_Path>
F:\Dekstop_files\DAC4,5\Molecular Systems Desgn and Engineering\supplementary_str

> <s_m_Source_File>
1000_str.mae

> <i_m_Source_File_Index>
424

> <i_lp_mmshare_version>
53156

> <s_epik_input>
W2NIXTFbY0hdW2NIXVtjSF1jKGMxMiljKFtDSDJdW05IXVtDSDJdW0NIXT1bQ0gyXSljKFtuSF0yKUMoPU8pW05IXVtDSF0zW0NIMl1bQ0gyXVtDSDJdW0NIMl1bQ0gyXTM=

> <s_epik_cmdline>
J2VwaWtfcHl0aG9uJywgJy1waHQnLCAnMC4wJywgJy1waCcsICc3LjAnLCAnLXRuJywgJzgnLCAnLW1hJywgJzUwMCcsICctaW1hZScsICc8aW5maWxlLm1hZT4nLCAnLW9tYWUnLCAnPG91dGZpbGUubWFlPic=

> <r_lp_tautomer_probability>
1

> <r_epik_Ionization_Penalty>
  0.0104

> <r_epik_Ionization_Penalty_Charging>
  0.0104

> <r_epik_Ionization_Penalty_Neutral>
  0.0000

> <r_epik_State_Penalty>
  0.0000

> <r_epik_Charging_Adjusted_Penalty>
0.0103731484996252

> <i_epik_Tot_Q>
1

> <i_epik_Tot_abs_Q>
1

> <s_lp_Force_Field>
S-OPLS

> <r_lp_Energy>
34.033231

> <b_lp_Chiralities_Consistent>
1

> <s_lp_Variant>
GR-14-1

> <s_i_glide_gridfile>
glide-grid_1_oct_mmpl3_after_loop_refinement

> <i_i_glide_lignum>
10

> <i_i_glide_rotatable_bonds>
7

> <r_i_docking_score>
-10.3235655618801

> <r_i_glide_ligand_efficiency>
-0.448850676603482

> <r_i_glide_ligand_efficiency_sa>
-1.27647161674255

> <r_i_glide_ligand_efficiency_ln>
-2.49633176177968

> <r_glide_XP_GScore>
-10.3235655618801

> <r_i_glide_gscore>
-10.3235655618801

> <r_i_glide_evdw>
-37.5262718200684

> <r_i_glide_ecoul>
-1.23227953910828

> <r_i_glide_energy>
-38.7585513591766

> <r_i_glide_einternal>
7.89662170410156

> <r_i_glide_emodel>
-48.6347114390998

> <r_glide_XP_HBond>
-0.238457394914232

> <r_glide_XP_PhobEn>
-2.08757023506589

> <r_glide_XP_PhobEnHB>
0

> <r_glide_XP_LowMW>
-0.4585692

> <r_glide_XP_RotPenal>
0.399286177554751

> <r_glide_XP_LipophilicEvdW>
-6.242253329208

> <r_glide_XP_PhobEnPairHB>
0

> <r_glide_XP_Electro>
-1.39242096543312

> <r_glide_XP_Sitemap>
-0.303711861703507

> <r_glide_XP_Penalties>
0.000131246889906304

> <r_glide_XP_PiStack>
0

> <r_glide_XP_HBPenal>
0

> <r_glide_XP_ExposPenal>
0

> <r_glide_XP_PiCat>
0

> <r_glide_XP_ClBr>
0

> <r_glide_XP_Zpotr>
0

> <i_i_glide_confnum>
1

> <i_i_glide_posenum>
2

> <r_i_glide_eff_state_penalty>
0

> <i_glide_XP_PoseRank>
1

> <r_i_glide_rmsd_to_input>
108.746103572228

> <s_psp_Prime_MMGBSA_Input_Structure_Hash>
2267a8844768fd95e901849ccd37bccad9d06b8deaec8e1157becd94

> <i_psp_number_heavy_atoms>
23

> <r_psp_MMGBSA_dG_Bind>
-52.3151266743371

> <r_psp_MMGBSA_dG_Bind_Coulomb>
60.5520855740797

> <r_psp_MMGBSA_dG_Bind_Covalent>
7.76950412008136

> <r_psp_MMGBSA_dG_Bind_Hbond>
-0.718682716446324

> <r_psp_MMGBSA_dG_Bind_Lipo>
-23.2453924584042

> <r_psp_MMGBSA_dG_Bind_Packing>
-1.73111124202475

> <r_psp_MMGBSA_dG_Bind_SelfCont>
7.105427357601e-015

> <r_psp_MMGBSA_dG_Bind_Solv_GB>
-51.7757363624169

> <r_psp_MMGBSA_dG_Bind_vdW>
-43.1657935892708

> <r_psp_Lig_Strain_Energy>
9.70231534151601

> <r_psp_Lig_Strain_Coulomb>
-0.3770415519243

> <r_psp_Lig_Strain_Covalent>
7.76970498819168

> <r_psp_Lig_Strain_Hbond>
0

> <r_psp_Lig_Strain_Lipo>
-0.322908796272788

> <r_psp_Lig_Strain_Packing>
0

> <r_psp_Lig_Strain_SelfCont>
0

> <r_psp_Lig_Strain_Solv_GB>
-0.263946354324787

> <r_psp_Lig_Strain_vdW>
2.89650705584616

> <r_psp_Ligand_Energy>
21.8420698693838

> <r_psp_Ligand_Coulomb>
13.8690352938065

> <r_psp_Ligand_Covalent>
20.3666693045049

> <r_psp_Ligand_Hbond>
0

> <r_psp_Ligand_Lipo>
-1.62204657630426

> <r_psp_Ligand_Packing>
0

> <r_psp_Ligand_SelfCont>
0

> <r_psp_Ligand_Solv_GB>
-21.2261110142965

> <r_psp_Ligand_vdW>
10.4545228616732

> <r_psp_Complex_Energy>
-34944.2198335958

> <r_psp_Complex_Coulomb>
-26386.2173075582

> <r_psp_Complex_Covalent>
4037.29151439382

> <r_psp_Complex_Hbond>
-550.816287799627

> <r_psp_Complex_Lipo>
-2138.35066718779

> <r_psp_Complex_Packing>
-57.5757536692337

> <r_psp_Complex_SelfCont>
-40.4078915603482

> <r_psp_Complex_Solv_GB>
-5282.82617861472

> <r_psp_Complex_vdW>
-4525.31726159965

> <r_psp_Receptor_Energy>
-34913.7467767908

> <r_psp_Receptor_Coulomb>
-26460.6384284261

> <r_psp_Receptor_Covalent>
4009.15534096923

> <r_psp_Receptor_Hbond>
-550.097605083181

> <r_psp_Receptor_Lipo>
-2113.48322815308

> <r_psp_Receptor_Packing>
-55.8446424272089

> <r_psp_Receptor_SelfCont>
-40.4078915603482

> <r_psp_Receptor_Solv_GB>
-5209.82433123801

> <r_psp_Receptor_vdW>
-4492.60599087205

> <r_psp_MMGBSA_dG_Bind(NS)>
-62.0174420159092

> <r_psp_MMGBSA_dG_Bind(NS)_Coulomb>
60.9291271260154

> <r_psp_MMGBSA_dG_Bind(NS)_Covalent>
-0.000200868114461628

> <r_psp_MMGBSA_dG_Bind(NS)_Hbond>
-0.718682716446096

> <r_psp_MMGBSA_dG_Bind(NS)_Lipo>
-22.9224836621288

> <r_psp_MMGBSA_dG_Bind(NS)_Packing>
-1.7311112420248

> <r_psp_MMGBSA_dG_Bind(NS)_SelfCont>
0

> <r_psp_MMGBSA_dG_Bind(NS)_Solv_GB>
-51.511790008095

> <r_psp_MMGBSA_dG_Bind(NS)_vdW>
-46.0623006451215

> <r_psp_Rec_Strain_Energy>
5.0931703299284e-011

> <r_psp_Rec_Strain_Coulomb>
-1.09139364212751e-011

> <r_psp_Rec_Strain_Covalent>
4.09272615797818e-012

> <r_psp_Rec_Strain_Hbond>
-2.27373675443232e-013

> <r_psp_Rec_Strain_Lipo>
-2.72848410531878e-012

> <r_psp_Rec_Strain_Packing>
4.9737991503207e-014

> <r_psp_Rec_Strain_SelfCont>
7.105427357601e-015

> <r_psp_Rec_Strain_Solv_GB>
2.72848410531878e-012

> <r_psp_Rec_Strain_vdW>
4.54747350886464e-012

> <r_psp_Prime_MMGBSA_ligand_efficiency>
-2.27457072497118

> <r_psp_Prime_MMGBSA_ligand_efficiency_sa>
-3.41185608745677

> <r_psp_Prime_MMGBSA_ligand_efficiency_ln>
-12.6502719971966

> <i_psp_ExecuteFunction_Internal_Entry_Index>
33

> <b_m_m_glide_XPvisualizer>
1

> <i_qp_#stars>
0

> <i_qp_#amine>
1

> <i_qp_#amidine>
0

> <i_qp_#acid>
0

> <i_qp_#amide>
0

> <i_qp_#rotor>
6

> <i_qp_#rtvFG>
0

> <i_qp_CNS>
0

> <r_qp_mol_MW>
   311.426

> <r_qp_dipole>
     5.961

> <r_qp_SASA>
   656.402

> <r_qp_FOSA>
   383.658

> <r_qp_FISA>
    58.531

> <r_qp_PISA>
   214.213

> <r_qp_WPSA>
     0.000

> <r_qp_volume>
  1123.961

> <r_qp_donorHB>
     3.000

> <r_qp_accptHB>
     4.000

> <r_qp_dip^2/V>
   0.0316174

> <r_qp_ACxDN^.5/SA>
   0.0105548

> <r_qp_glob>
   0.7964575

> <r_qp_QPpolrz>
    37.020

> <r_qp_QPlogPC16>
    11.255

> <r_qp_QPlogPoct>
    18.507

> <r_qp_QPlogPw>
    10.164

> <r_qp_QPlogPo/w>
     3.567

> <r_qp_QPlogS>
    -4.216

> <r_qp_CIQPlogS>
    -3.221

> <r_qp_QPlogHERG>
    -6.573

> <r_qp_QPPCaco>
   688.258

> <r_qp_QPlogBB>
    -0.015

> <r_qp_QPPMDCK>
   365.475

> <r_qp_QPlogKp>
    -3.330

> <r_qp_IP(eV)>
     8.389

> <r_qp_EA(eV)>
     0.399

> <i_qp_#metab>
3

> <r_qp_QPlogKhsa>
     0.459

> <i_qp_HumanOralAbsorption>
3

> <r_qp_PercentHumanOralAbsorption>
   100.000

> <r_qp_SAfluorine>
     0.000

> <r_qp_SAamideO>
     0.000

> <r_qp_PSA>
    62.351

> <i_qp_#NandO>
4

> <i_qp_RuleOfFive>
0

> <i_qp_RuleOfThree>
0

> <i_qp_#ringatoms>
15

> <i_qp_#in34>
0

> <i_qp_#in56>
15

> <i_qp_#noncon>
6

> <i_qp_#nonHatm>
23

> <r_qp_Jm>
0.00886376761983286

> <s_m_subgroupid>
100str_copy1

> <s_m_subgroup_title>
100str

> <b_m_subgroup_collapsed>
0

$$$$
GR-15
                    3D
 Structure written by MMmdl.
 59 62  0  0  1  0            999 V2000
   -1.2406    4.8812   -1.7324 C   0  0  0  0  0  0
   -1.1900    3.7343   -0.9324 C   0  0  0  0  0  0
   -0.5251    2.5439   -1.3390 C   0  0  0  0  0  0
    0.1016    2.5261   -2.5972 C   0  0  0  0  0  0
    0.0526    3.6654   -3.3987 C   0  0  0  0  0  0
   -0.6044    4.8160   -2.9720 C   0  0  0  0  0  0
   -0.6599    1.5775   -0.2778 C   0  0  0  0  0  0
   -1.4219    2.1930    0.7256 C   0  0  0  0  0  0
   -1.7030    3.4806    0.3164 N   0  0  0  0  0  0
   -0.0743    0.1725   -0.3160 C   0  0  0  0  0  0
    1.4438    0.2243   -0.0679 N   0  3  0  0  0  0
   -1.8045    1.6762    2.0253 C   0  0  0  0  0  0
   -2.8065    2.3424    2.6357 N   0  0  0  0  0  0
   -3.3555    2.0332    3.9581 C   0  0  0  0  0  0
   -2.4025    2.3300    5.1469 C   0  0  0  0  0  0
   -3.0251    2.0397    6.5268 C   0  0  0  0  0  0
   -4.3989    2.7070    6.7002 C   0  0  0  0  0  0
   -5.3595    2.3052    5.5693 C   0  0  0  0  0  0
   -4.7772    2.6059    4.1741 C   0  0  0  0  0  0
   -1.2508    0.6909    2.5141 O   0  0  0  0  0  0
    1.8807    0.7317    1.3166 C   0  0  0  0  0  0
    3.3900    0.7439    1.4831 C   0  0  0  0  0  0
    4.0366   -0.3407    2.0778 C   0  0  0  0  0  0
    5.4192   -0.3208    2.2386 C   0  0  0  0  0  0
    6.1685    0.7775    1.8139 C   0  0  0  0  0  0
    5.5105    1.8704    1.2266 C   0  0  0  0  0  0
    4.1275    1.8537    1.0673 C   0  0  0  0  0  0
    7.5342    0.7041    2.0098 O   0  0  0  0  0  0
    8.3568    1.7852    1.5837 C   0  0  0  0  0  0
   -1.7463    5.7810   -1.4133 H   0  0  0  0  0  0
    0.6181    1.6438   -2.9452 H   0  0  0  0  0  0
    0.5325    3.6564   -4.3666 H   0  0  0  0  0  0
   -0.6216    5.6814   -3.6187 H   0  0  0  0  0  0
   -2.2234    4.1228    0.8962 H   0  0  0  0  0  0
   -0.4578   -0.5196    0.4331 H   0  0  0  0  0  0
   -0.1645   -0.3018   -1.2937 H   0  0  0  0  0  0
   -3.1733    3.1710    2.1915 H   0  0  0  0  0  0
   -3.5015    0.9499    3.9785 H   0  0  0  0  0  0
   -1.4785    1.7586    5.0486 H   0  0  0  0  0  0
   -2.1246    3.3848    5.1194 H   0  0  0  0  0  0
   -3.1291    0.9611    6.6557 H   0  0  0  0  0  0
   -2.3484    2.3738    7.3144 H   0  0  0  0  0  0
   -4.8263    2.4329    7.6656 H   0  0  0  0  0  0
   -4.2814    3.7917    6.7150 H   0  0  0  0  0  0
   -5.5809    1.2396    5.6457 H   0  0  0  0  0  0
   -6.3128    2.8210    5.6918 H   0  0  0  0  0  0
   -4.7437    3.6899    4.0535 H   0  0  0  0  0  0
   -5.4577    2.2240    3.4113 H   0  0  0  0  0  0
    1.4576    1.7326    1.4139 H   0  0  0  0  0  0
    1.3901    0.0686    2.0309 H   0  0  0  0  0  0
    3.4727   -1.1989    2.4136 H   0  0  0  0  0  0
    5.9139   -1.1652    2.6965 H   0  0  0  0  0  0
    6.0546    2.7397    0.8896 H   0  0  0  0  0  0
    3.6324    2.7017    0.6159 H   0  0  0  0  0  0
    9.3981    1.5565    1.8104 H   0  0  0  0  0  0
    8.1021    2.7107    2.1020 H   0  0  0  0  0  0
    8.2814    1.9447    0.5069 H   0  0  0  0  0  0
    1.8151   -0.7072   -0.1891 H   0  0  0  0  0  0
    1.8645    0.8103   -0.7748 H   0  0  0  0  0  0
  1  2  1  0  0  0
  1  6  2  0  0  0
  1 30  1  0  0  0
  2  3  2  0  0  0
  2  9  1  0  0  0
  3  4  1  0  0  0
  3  7  1  0  0  0
  4  5  2  0  0  0
  4 31  1  0  0  0
  5  6  1  0  0  0
  5 32  1  0  0  0
  6 33  1  0  0  0
  7  8  2  0  0  0
  7 10  1  0  0  0
  8  9  1  0  0  0
  8 12  1  0  0  0
  9 34  1  0  0  0
 10 11  1  0  0  0
 10 35  1  0  0  0
 10 36  1  0  0  0
 11 21  1  0  0  0
 11 58  1  0  0  0
 11 59  1  0  0  0
 12 13  1  0  0  0
 12 20  2  0  0  0
 13 14  1  0  0  0
 13 37  1  0  0  0
 14 19  1  0  0  0
 14 15  1  0  0  0
 14 38  1  0  0  0
 15 16  1  0  0  0
 15 39  1  0  0  0
 15 40  1  0  0  0
 16 17  1  0  0  0
 16 41  1  0  0  0
 16 42  1  0  0  0
 17 18  1  0  0  0
 17 43  1  0  0  0
 17 44  1  0  0  0
 18 19  1  0  0  0
 18 45  1  0  0  0
 18 46  1  0  0  0
 19 47  1  0  0  0
 19 48  1  0  0  0
 21 22  1  0  0  0
 21 49  1  0  0  0
 21 50  1  0  0  0
 22 27  1  0  0  0
 22 23  2  0  0  0
 23 24  1  0  0  0
 23 51  1  0  0  0
 24 25  2  0  0  0
 24 52  1  0  0  0
 25 26  1  0  0  0
 25 28  1  0  0  0
 26 27  2  0  0  0
 26 53  1  0  0  0
 27 54  1  0  0  0
 28 29  1  0  0  0
 29 55  1  0  0  0
 29 56  1  0  0  0
 29 57  1  0  0  0
M  CHG  1  11   1
M  END
> <s_m_entry_id>
8188

> <s_m_entry_name>
entry

> <i_f3d_flags>
0

> <s_m_job_name>
adme_1000

> <r_psp_Prime_Energy>
-34966.4364962323

> <r_psp_Prime_Solv_GB>
-5261.55474361395

> <r_psp_Prime_Coulomb>
-26423.6412834893

> <r_psp_Prime_vdW>
-4530.34047560321

> <r_psp_Prime_Covalent>
4047.16782505344

> <i_psp_model_num>
0

> <r_psp_Prime_Lipo>
-2151.71767950855

> <s_psp_Prime_Energy_Force_Field>
OPLS3e

> <s_psp_Prime_Energy_Solvent_Model>
VSGB2.1

> <r_psp_Prime_Hbond>
-550.097605083181

> <r_psp_Prime_Packing>
-55.8446424272089

> <r_psp_Prime_SelfCont>
-40.4078915603482

> <r_psp_Memb1_x>
103.457542316003

> <r_psp_Memb1_y>
39.4731108300965

> <r_psp_Memb1_z>
48.7987221124676

> <r_psp_Memb2_x>
99.8134167309003

> <r_psp_Memb2_y>
2.81176945184187

> <r_psp_Memb2_z>
23.8404289603493

> <r_psp_MembDummyRadius>
4.45

> <r_psp_Prime_Bond_Covalent>
468.155894816051

> <r_psp_Prime_Bond_SGB>
49973.4365749614

> <r_psp_Prime_Angle_Covalent>
2226.1360175528

> <r_psp_Prime_Angle_SGB>
-21642.4573189026

> <r_psp_Prime_Torsion_Covalent>
1352.87591268458

> <r_psp_Prime_NB14_LJ>
4089.50608288726

> <r_psp_Prime_NB14_Lipo>
0

> <r_psp_Prime_NB14_Elec>
25547.0880110905

> <r_psp_Prime_NB14_SGB>
-15605.6280546479

> <r_psp_Prime_NBShort_LJ>
-8212.33852154897

> <r_psp_Prime_NBShort_Lipo>
-2151.71767950855

> <r_psp_Prime_NBShort_Elec>
-53026.1328031032

> <r_psp_Prime_NBShort_SGB>
17984.9329374961

> <r_psp_Prime_NBLong_LJ>
-407.508036941501

> <r_psp_Prime_NBLong_Lipo>
0

> <r_psp_Prime_NBLong_Elec>
1055.40350852345

> <r_psp_Prime_NBLong_SGB>
-1211.13369328283

> <r_psp_Prime_Self_SGB>
-34760.7051892381

> <s_m_Source_Path>
F:\Dekstop_files\DAC4,5\Molecular Systems Desgn and Engineering\supplementary_str

> <s_m_Source_File>
1000_str.mae

> <i_m_Source_File_Index>
849

> <i_lp_mmshare_version>
53156

> <s_epik_input>
W2NIXTFbY0hdYyhPW0NIM10pW2NIXVtjSF1jMVtDSDJdW05IXVtDSDJdYyhjKGMyMylbY0hdW2NIXVtjSF1bY0hdMiljKFtuSF0zKUMoPU8pW05IXVtDSF00W0NIMl1bQ0gyXVtDSDJdW0NIMl1bQ0gyXTQ=

> <s_epik_cmdline>
J2VwaWtfcHl0aG9uJywgJy1waHQnLCAnMC4wJywgJy1waCcsICc3LjAnLCAnLXRuJywgJzgnLCAnLW1hJywgJzUwMCcsICctaW1hZScsICc8aW5maWxlLm1hZT4nLCAnLW9tYWUnLCAnPG91dGZpbGUubWFlPic=

> <r_lp_tautomer_probability>
1

> <r_epik_Ionization_Penalty>
  0.0782

> <r_epik_Ionization_Penalty_Charging>
  0.0782

> <r_epik_Ionization_Penalty_Neutral>
  0.0000

> <r_epik_State_Penalty>
  0.0692

> <r_epik_Charging_Adjusted_Penalty>
0.147399602182074

> <i_epik_Tot_Q>
1

> <i_epik_Tot_abs_Q>
1

> <s_lp_Force_Field>
S-OPLS

> <r_lp_Energy>
46.82223

> <b_lp_Chiralities_Consistent>
1

> <s_lp_Variant>
GR-15-1

> <s_i_glide_gridfile>
glide-grid_1_oct_mmpl3_after_loop_refinement

> <i_i_glide_lignum>
11

> <i_i_glide_rotatable_bonds>
8

> <r_i_docking_score>
-8.51754361454118

> <r_i_glide_ligand_efficiency>
-0.29370840050142

> <r_i_glide_ligand_efficiency_sa>
-0.902365259692947

> <r_i_glide_ligand_efficiency_ln>
-1.95030150145967

> <r_glide_XP_GScore>
-8.58674361454118

> <r_i_glide_gscore>
-8.58674361454118

> <r_i_glide_evdw>
-47.0404319763184

> <r_i_glide_ecoul>
-2.55619931221008

> <r_i_glide_energy>
-49.5966312885284

> <r_i_glide_einternal>
15.0254545211792

> <r_i_glide_emodel>
-68.2011276267652

> <r_glide_XP_HBond>
0

> <r_glide_XP_PhobEn>
-2.7

> <r_glide_XP_PhobEnHB>
0

> <r_glide_XP_LowMW>
-0.191620333333333

> <r_glide_XP_RotPenal>
0.38020149787419

> <r_glide_XP_LipophilicEvdW>
-8.63918076634044

> <r_glide_XP_PhobEnPairHB>
0

> <r_glide_XP_Electro>
-0.191714948415756

> <r_glide_XP_Sitemap>
-0.244520296802794

> <r_glide_XP_Penalties>
3.00009123247695

> <r_glide_XP_PiStack>
0

> <r_glide_XP_HBPenal>
0

> <r_glide_XP_ExposPenal>
0

> <r_glide_XP_PiCat>
0

> <r_glide_XP_ClBr>
0

> <r_glide_XP_Zpotr>
0

> <i_i_glide_confnum>
1

> <i_i_glide_posenum>
30

> <r_i_glide_eff_state_penalty>
0.0692

> <i_glide_XP_PoseRank>
1

> <r_i_glide_rmsd_to_input>
109.403293345374

> <s_psp_Prime_MMGBSA_Input_Structure_Hash>
ce10ebbf821336b113a1c7f9843628c829487987ff79fe28d75acb08

> <i_psp_number_heavy_atoms>
29

> <r_psp_MMGBSA_dG_Bind>
-58.1559809960963

> <r_psp_MMGBSA_dG_Bind_Coulomb>
48.5873383519756

> <r_psp_MMGBSA_dG_Bind_Covalent>
12.8007195258606

> <r_psp_MMGBSA_dG_Bind_Hbond>
-2.27373675443232e-013

> <r_psp_MMGBSA_dG_Bind_Lipo>
-31.1726857873086

> <r_psp_MMGBSA_dG_Bind_Packing>
4.9737991503207e-014

> <r_psp_MMGBSA_dG_Bind_SelfCont>
7.105427357601e-015

> <r_psp_MMGBSA_dG_Bind_Solv_GB>
-34.1285546866138

> <r_psp_MMGBSA_dG_Bind_vdW>
-54.2427984000697

> <r_psp_Lig_Strain_Energy>
26.7127128539246

> <r_psp_Lig_Strain_Coulomb>
7.03055922454181

> <r_psp_Lig_Strain_Covalent>
12.8009203939719

> <r_psp_Lig_Strain_Hbond>
0

> <r_psp_Lig_Strain_Lipo>
4.01356617534806

> <r_psp_Lig_Strain_Packing>
0

> <r_psp_Lig_Strain_SelfCont>
0

> <r_psp_Lig_Strain_Solv_GB>
-4.24596899558746

> <r_psp_Lig_Strain_vdW>
7.11363605565036

> <r_psp_Ligand_Energy>
5.46626155460622

> <r_psp_Ligand_Coulomb>
-11.5901934151548

> <r_psp_Ligand_Covalent>
25.2117645583454

> <r_psp_Ligand_Hbond>
0

> <r_psp_Ligand_Lipo>
-7.0617655681655

> <r_psp_Ligand_Packing>
0

> <r_psp_Ligand_SelfCont>
0

> <r_psp_Ligand_Solv_GB>
-17.6018576893258

> <r_psp_Ligand_vdW>
16.5083136689069

> <r_psp_Complex_Energy>
-34966.4364962323

> <r_psp_Complex_Coulomb>
-26423.6412834893

> <r_psp_Complex_Covalent>
4047.16782505344

> <r_psp_Complex_Hbond>
-550.097605083181

> <r_psp_Complex_Lipo>
-2151.71767950855

> <r_psp_Complex_Packing>
-55.8446424272089

> <r_psp_Complex_SelfCont>
-40.4078915603482

> <r_psp_Complex_Solv_GB>
-5261.55474361395

> <r_psp_Complex_vdW>
-4530.34047560321

> <r_psp_Receptor_Energy>
-34913.7467767908

> <r_psp_Receptor_Coulomb>
-26460.6384284261

> <r_psp_Receptor_Covalent>
4009.15534096923

> <r_psp_Receptor_Hbond>
-550.097605083181

> <r_psp_Receptor_Lipo>
-2113.48322815308

> <r_psp_Receptor_Packing>
-55.8446424272089

> <r_psp_Receptor_SelfCont>
-40.4078915603482

> <r_psp_Receptor_Solv_GB>
-5209.82433123801

> <r_psp_Receptor_vdW>
-4492.60599087205

> <r_psp_MMGBSA_dG_Bind(NS)>
-84.8686938500759

> <r_psp_MMGBSA_dG_Bind(NS)_Coulomb>
41.5567791274443

> <r_psp_MMGBSA_dG_Bind(NS)_Covalent>
-0.000200868115371122

> <r_psp_MMGBSA_dG_Bind(NS)_Hbond>
0

> <r_psp_MMGBSA_dG_Bind(NS)_Lipo>
-35.1862519626538

> <r_psp_MMGBSA_dG_Bind(NS)_Packing>
0

> <r_psp_MMGBSA_dG_Bind(NS)_SelfCont>
0

> <r_psp_MMGBSA_dG_Bind(NS)_Solv_GB>
-29.8825856910289

> <r_psp_MMGBSA_dG_Bind(NS)_vdW>
-61.3564344557244

> <r_psp_Rec_Strain_Energy>
5.0931703299284e-011

> <r_psp_Rec_Strain_Coulomb>
-1.09139364212751e-011

> <r_psp_Rec_Strain_Covalent>
4.09272615797818e-012

> <r_psp_Rec_Strain_Hbond>
-2.27373675443232e-013

> <r_psp_Rec_Strain_Lipo>
-2.72848410531878e-012

> <r_psp_Rec_Strain_Packing>
4.9737991503207e-014

> <r_psp_Rec_Strain_SelfCont>
7.105427357601e-015

> <r_psp_Rec_Strain_Solv_GB>
2.72848410531878e-012

> <r_psp_Rec_Strain_vdW>
4.54747350886464e-012

> <r_psp_Prime_MMGBSA_ligand_efficiency>
-2.0053786550378

> <r_psp_Prime_MMGBSA_ligand_efficiency_sa>
-3.00806798255671

> <r_psp_Prime_MMGBSA_ligand_efficiency_ln>
-13.3162449396693

> <i_psp_ExecuteFunction_Internal_Entry_Index>
84

> <b_m_m_glide_XPvisualizer>
1

> <i_qp_#stars>
0

> <i_qp_#amine>
1

> <i_qp_#amidine>
0

> <i_qp_#acid>
0

> <i_qp_#amide>
0

> <i_qp_#rotor>
7

> <i_qp_#rtvFG>
0

> <i_qp_CNS>
0

> <r_qp_mol_MW>
   391.512

> <r_qp_dipole>
     8.288

> <r_qp_SASA>
   745.949

> <r_qp_FOSA>
   381.932

> <r_qp_FISA>
    55.235

> <r_qp_PISA>
   308.783

> <r_qp_WPSA>
     0.000

> <r_qp_volume>
  1324.186

> <r_qp_donorHB>
     3.000

> <r_qp_accptHB>
     4.750

> <r_qp_dip^2/V>
   0.0518763

> <r_qp_ACxDN^.5/SA>
   0.0110292

> <r_qp_glob>
   0.7817867

> <r_qp_QPpolrz>
    45.294

> <r_qp_QPlogPC16>
    13.879

> <r_qp_QPlogPoct>
    22.178

> <r_qp_QPlogPw>
    11.519

> <r_qp_QPlogPo/w>
     4.663

> <r_qp_QPlogS>
    -5.404

> <r_qp_CIQPlogS>
    -4.903

> <r_qp_QPlogHERG>
    -7.262

> <r_qp_QPPCaco>
   739.623

> <r_qp_QPlogBB>
    -0.062

> <r_qp_QPPMDCK>
   395.044

> <r_qp_QPlogKp>
    -2.840

> <r_qp_IP(eV)>
     8.536

> <r_qp_EA(eV)>
     0.573

> <i_qp_#metab>
4

> <r_qp_QPlogKhsa>
     0.818

> <i_qp_HumanOralAbsorption>
3

> <r_qp_PercentHumanOralAbsorption>
   100.000

> <r_qp_SAfluorine>
     0.000

> <r_qp_SAamideO>
     0.000

> <r_qp_PSA>
    69.956

> <i_qp_#NandO>
5

> <i_qp_RuleOfFive>
0

> <i_qp_RuleOfThree>
0

> <i_qp_#ringatoms>
21

> <i_qp_#in34>
0

> <i_qp_#in56>
21

> <i_qp_#noncon>
6

> <i_qp_#nonHatm>
29

> <r_qp_Jm>
0.00222878748756843

> <s_m_subgroupid>
100str_copy1

> <s_m_subgroup_title>
100str

> <b_m_subgroup_collapsed>
0

$$$$
GR-16
                    3D
 Structure written by MMmdl.
 56 59  0  0  1  0            999 V2000
   -3.4390    1.7545    0.3485 C   0  0  0  0  0  0
   -2.3559    0.8743    0.2485 C   0  0  0  0  0  0
   -1.0049    1.3207    0.2174 C   0  0  0  0  0  0
   -0.7567    2.7025    0.2927 C   0  0  0  0  0  0
   -1.8323    3.5830    0.3940 C   0  0  0  0  0  0
   -3.1432    3.1157    0.4206 C   0  0  0  0  0  0
   -0.1599    0.1593    0.0994 C   0  0  0  0  0  0
   -1.0107   -0.9537    0.0954 C   0  0  0  0  0  0
   -2.3109   -0.4961    0.1600 N   0  0  0  0  0  0
    1.3597    0.1953    0.0318 C   0  0  0  0  0  0
   -0.6655   -2.3556   -0.0407 C   0  0  0  0  0  0
   -1.6438   -3.2222    0.2937 N   0  0  0  0  0  0
   -1.5517   -4.6832    0.2384 C   0  0  0  0  0  0
   -2.6169   -5.3888    1.1126 C   0  0  0  0  0  0
   -2.5503   -6.9278    1.0507 C   0  0  0  0  0  0
   -2.5494   -7.4532   -0.3939 C   0  0  0  0  0  0
   -1.4125   -6.8232   -1.2147 C   0  0  0  0  0  0
   -1.4557   -5.2823   -1.1907 C   0  0  0  0  0  0
    0.4535   -2.7066   -0.4187 O   0  0  0  0  0  0
    1.8336   -0.0010   -1.4291 N   0  3  2  0  0  0
    3.3613   -0.2480   -1.4522 C   0  0  0  0  0  0
    3.8109   -0.5012   -2.9047 C   0  0  0  0  0  0
    3.4261    0.6481   -3.8580 C   0  0  1  0  0  0
    1.9118    0.9258   -3.7699 C   0  0  0  0  0  0
    1.4330    1.1948   -2.3296 C   0  0  0  0  0  0
    4.1665    1.8158   -3.5534 O   0  0  0  0  0  0
   -4.4612    1.4060    0.3705 H   0  0  0  0  0  0
    0.2530    3.0852    0.2711 H   0  0  0  0  0  0
   -1.6467    4.6458    0.4522 H   0  0  0  0  0  0
   -3.9528    3.8269    0.4995 H   0  0  0  0  0  0
   -3.1000   -1.1260    0.1448 H   0  0  0  0  0  0
    1.8038    1.1313    0.3752 H   0  0  0  0  0  0
    1.8093   -0.6222    0.5976 H   0  0  0  0  0  0
   -2.5514   -2.8515    0.5328 H   0  0  0  0  0  0
   -0.6034   -4.9428    0.7165 H   0  0  0  0  0  0
   -2.5261   -5.0672    2.1515 H   0  0  0  0  0  0
   -3.6087   -5.0854    0.7734 H   0  0  0  0  0  0
   -1.6485   -7.2710    1.5605 H   0  0  0  0  0  0
   -3.3892   -7.3566    1.6003 H   0  0  0  0  0  0
   -2.4501   -8.5394   -0.3948 H   0  0  0  0  0  0
   -3.5085   -7.2333   -0.8654 H   0  0  0  0  0  0
   -0.4530   -7.1626   -0.8211 H   0  0  0  0  0  0
   -1.4584   -7.1787   -2.2449 H   0  0  0  0  0  0
   -2.3268   -4.9623   -1.7647 H   0  0  0  0  0  0
   -0.5774   -4.8966   -1.7097 H   0  0  0  0  0  0
    3.8370    0.6303   -1.0124 H   0  0  0  0  0  0
    3.5542   -1.1170   -0.8212 H   0  0  0  0  0  0
    4.8911   -0.6531   -2.9253 H   0  0  0  0  0  0
    3.3761   -1.4356   -3.2629 H   0  0  0  0  0  0
    3.6858    0.3740   -4.8816 H   0  0  0  0  0  0
    1.6551    1.7794   -4.3994 H   0  0  0  0  0  0
    1.3604    0.0801   -4.1839 H   0  0  0  0  0  0
    0.3475    1.2841   -2.2933 H   0  0  0  0  0  0
    1.8829    2.0896   -1.8963 H   0  0  0  0  0  0
    3.9718    2.0775   -2.6508 H   0  0  0  0  0  0
    1.3893   -0.8326   -1.7937 H   0  0  0  0  0  0
  1  2  1  0  0  0
  1  6  2  0  0  0
  1 27  1  0  0  0
  2  3  2  0  0  0
  2  9  1  0  0  0
  3  4  1  0  0  0
  3  7  1  0  0  0
  4  5  2  0  0  0
  4 28  1  0  0  0
  5  6  1  0  0  0
  5 29  1  0  0  0
  6 30  1  0  0  0
  7  8  2  0  0  0
  7 10  1  0  0  0
  8  9  1  0  0  0
  8 11  1  0  0  0
  9 31  1  0  0  0
 10 20  1  0  0  0
 10 32  1  0  0  0
 10 33  1  0  0  0
 11 12  1  0  0  0
 11 19  2  0  0  0
 12 13  1  0  0  0
 12 34  1  0  0  0
 13 18  1  0  0  0
 13 14  1  0  0  0
 13 35  1  0  0  0
 14 15  1  0  0  0
 14 36  1  0  0  0
 14 37  1  0  0  0
 15 16  1  0  0  0
 15 38  1  0  0  0
 15 39  1  0  0  0
 16 17  1  0  0  0
 16 40  1  0  0  0
 16 41  1  0  0  0
 17 18  1  0  0  0
 17 42  1  0  0  0
 17 43  1  0  0  0
 18 44  1  0  0  0
 18 45  1  0  0  0
 20 25  1  0  0  0
 20 21  1  0  0  0
 20 56  1  0  0  0
 21 22  1  0  0  0
 21 46  1  0  0  0
 21 47  1  0  0  0
 22 23  1  0  0  0
 22 48  1  0  0  0
 22 49  1  0  0  0
 23 24  1  0  0  0
 23 26  1  0  0  0
 23 50  1  0  0  0
 24 25  1  0  0  0
 24 51  1  0  0  0
 24 52  1  0  0  0
 25 53  1  0  0  0
 25 54  1  0  0  0
 26 55  1  0  0  0
M  CHG  1  20   1
M  END
> <s_m_entry_id>
8189

> <s_m_entry_name>
entry

> <i_f3d_flags>
0

> <s_m_job_name>
adme_1000

> <r_psp_Prime_Energy>
-34948.772045584

> <r_psp_Prime_Solv_GB>
-5275.28191776366

> <r_psp_Prime_Coulomb>
-26408.9978216054

> <r_psp_Prime_vdW>
-4513.27561726617

> <r_psp_Prime_Covalent>
4040.63810796204

> <i_psp_model_num>
0

> <r_psp_Prime_Lipo>
-2145.50367258566

> <s_psp_Prime_Energy_Force_Field>
OPLS3e

> <s_psp_Prime_Energy_Solvent_Model>
VSGB2.1

> <r_psp_Prime_Hbond>
-550.098589918757

> <r_psp_Prime_Packing>
-55.8446428461123

> <r_psp_Prime_SelfCont>
-40.4078915603482

> <r_psp_Memb1_x>
103.457542316003

> <r_psp_Memb1_y>
39.4731108300965

> <r_psp_Memb1_z>
48.7987221124676

> <r_psp_Memb2_x>
99.8134167309003

> <r_psp_Memb2_y>
2.81176945184187

> <r_psp_Memb2_z>
23.8404289603493

> <r_psp_MembDummyRadius>
4.45

> <r_psp_Prime_Bond_Covalent>
467.287487372101

> <r_psp_Prime_Bond_SGB>
49991.3623261916

> <r_psp_Prime_Angle_Covalent>
2229.43812982804

> <r_psp_Prime_Angle_SGB>
-21652.2767217406

> <r_psp_Prime_Torsion_Covalent>
1343.91249076189

> <r_psp_Prime_NB14_LJ>
4083.51084486845

> <r_psp_Prime_NB14_Lipo>
0

> <r_psp_Prime_NB14_Elec>
25523.4229557479

> <r_psp_Prime_NB14_SGB>
-15597.5942673263

> <r_psp_Prime_NBShort_LJ>
-8189.33753695099

> <r_psp_Prime_NBShort_Lipo>
-2145.50367258566

> <r_psp_Prime_NBShort_Elec>
-53016.8074732925

> <r_psp_Prime_NBShort_SGB>
17996.2673772451

> <r_psp_Prime_NBLong_LJ>
-407.448925183629

> <r_psp_Prime_NBLong_Lipo>
0

> <r_psp_Prime_NBLong_Elec>
1084.38669593929

> <r_psp_Prime_NBLong_SGB>
-1241.03009443335

> <r_psp_Prime_Self_SGB>
-34772.0105377

> <s_m_Source_Path>
F:\Dekstop_files\DAC4,5\Molecular Systems Desgn and Engineering\supplementary_str

> <s_m_Source_File>
1000_str.mae

> <i_m_Source_File_Index>
198

> <i_lp_mmshare_version>
53156

> <s_epik_input>
W0NIMl0xW0NIMl1bQ0hdKFtPSF0pW0NIMl1bQ0gyXU4xW0NIMl1jKGMoYzIzKVtjSF1bY0hdW2NIXVtjSF0yKWMoW25IXTMpQyg9TylbTkhdW0NIXTRbQ0gyXVtDSDJdW0NIMl1bQ0gyXVtDSDJdNA==

> <s_epik_cmdline>
J2VwaWtfcHl0aG9uJywgJy1waHQnLCAnMC4wJywgJy1waCcsICc3LjAnLCAnLXRuJywgJzgnLCAnLW1hJywgJzUwMCcsICctaW1hZScsICc8aW5maWxlLm1hZT4nLCAnLW9tYWUnLCAnPG91dGZpbGUubWFlPic=

> <r_epik_Ionization_Penalty>
  0.0441

> <r_epik_Ionization_Penalty_Charging>
  0.0441

> <r_epik_Ionization_Penalty_Neutral>
  0.0000

> <r_epik_State_Penalty>
  0.0373

> <r_epik_Charging_Adjusted_Penalty>
0.0814057104876503

> <i_epik_Tot_Q>
1

> <i_epik_Tot_abs_Q>
1

> <s_lp_Force_Field>
S-OPLS

> <r_lp_Energy>
39.555147

> <b_lp_Chiralities_Consistent>
1

> <s_lp_Variant>
GR-16-1

> <s_i_glide_gridfile>
glide-grid_1_oct_mmpl3_after_loop_refinement

> <i_i_glide_lignum>
13

> <i_i_glide_rotatable_bonds>
6

> <r_i_docking_score>
-7.12219238267582

> <r_i_glide_ligand_efficiency>
-0.273930476256762

> <r_i_glide_ligand_efficiency_sa>
-0.811517958046282

> <r_i_glide_ligand_efficiency_ln>
-1.67262351125208

> <r_glide_XP_GScore>
-7.15949238267582

> <r_i_glide_gscore>
-7.15949238267582

> <r_i_glide_evdw>
-37.4572601318359

> <r_i_glide_ecoul>
-0.59072470664978

> <r_i_glide_energy>
-38.0479848384857

> <r_i_glide_einternal>
5.1046028137207

> <r_i_glide_emodel>
-52.9914353061745

> <r_glide_XP_HBond>
0

> <r_glide_XP_PhobEn>
-2.66417592119314

> <r_glide_XP_PhobEnHB>
0

> <r_glide_XP_LowMW>
-0.311727333333333

> <r_glide_XP_RotPenal>
0.322625352283035

> <r_glide_XP_LipophilicEvdW>
-7.06191678207598

> <r_glide_XP_PhobEnPairHB>
0

> <r_glide_XP_Electro>
-0.0443043529987335

> <r_glide_XP_Sitemap>
-0.4

> <r_glide_XP_Penalties>
3.00000665464233

> <r_glide_XP_PiStack>
0

> <r_glide_XP_HBPenal>
0

> <r_glide_XP_ExposPenal>
0

> <r_glide_XP_PiCat>
0

> <r_glide_XP_ClBr>
0

> <r_glide_XP_Zpotr>
0

> <i_i_glide_confnum>
1

> <i_i_glide_posenum>
283

> <r_i_glide_eff_state_penalty>
0.0373

> <i_glide_XP_PoseRank>
1

> <r_i_glide_rmsd_to_input>
112.686899690085

> <s_psp_Prime_MMGBSA_Input_Structure_Hash>
9e3d0ea7633d44ee35f2a8557d7d4a0dfb72a8a036520d533c856c21

> <i_psp_number_heavy_atoms>
26

> <r_psp_MMGBSA_dG_Bind>
-42.6960807682044

> <r_psp_MMGBSA_dG_Bind_Coulomb>
57.1779062943206

> <r_psp_MMGBSA_dG_Bind_Covalent>
8.01665344532012

> <r_psp_MMGBSA_dG_Bind_Hbond>
-0.000984835575991383

> <r_psp_MMGBSA_dG_Bind_Lipo>
-30.1652800028978

> <r_psp_MMGBSA_dG_Bind_Packing>
-4.18903432830575e-007

> <r_psp_MMGBSA_dG_Bind_SelfCont>
7.105427357601e-015

> <r_psp_MMGBSA_dG_Bind_Solv_GB>
-42.6609278240894

> <r_psp_MMGBSA_dG_Bind_vdW>
-35.0634474264334

> <r_psp_Lig_Strain_Energy>
11.9585644922821

> <r_psp_Lig_Strain_Coulomb>
0.00349611414789486

> <r_psp_Lig_Strain_Covalent>
8.01685431343154

> <r_psp_Lig_Strain_Hbond>
0

> <r_psp_Lig_Strain_Lipo>
-0.373927537548919

> <r_psp_Lig_Strain_Packing>
0

> <r_psp_Lig_Strain_SelfCont>
0

> <r_psp_Lig_Strain_Solv_GB>
-0.200304876953709

> <r_psp_Lig_Strain_vdW>
4.51244647920525

> <r_psp_Ligand_Energy>
7.67081197497839

> <r_psp_Ligand_Coulomb>
-5.53729947358008

> <r_psp_Ligand_Covalent>
23.4661135474859

> <r_psp_Ligand_Hbond>
0

> <r_psp_Ligand_Lipo>
-1.85516442967949

> <r_psp_Ligand_Packing>
0

> <r_psp_Ligand_SelfCont>
0

> <r_psp_Ligand_Solv_GB>
-22.796658701563

> <r_psp_Ligand_vdW>
14.3938210323151

> <r_psp_Complex_Energy>
-34948.772045584

> <r_psp_Complex_Coulomb>
-26408.9978216054

> <r_psp_Complex_Covalent>
4040.63810796204

> <r_psp_Complex_Hbond>
-550.098589918757

> <r_psp_Complex_Lipo>
-2145.50367258566

> <r_psp_Complex_Packing>
-55.8446428461123

> <r_psp_Complex_SelfCont>
-40.4078915603482

> <r_psp_Complex_Solv_GB>
-5275.28191776366

> <r_psp_Complex_vdW>
-4513.27561726617

> <r_psp_Receptor_Energy>
-34913.7467767908

> <r_psp_Receptor_Coulomb>
-26460.6384284261

> <r_psp_Receptor_Covalent>
4009.15534096923

> <r_psp_Receptor_Hbond>
-550.097605083181

> <r_psp_Receptor_Lipo>
-2113.48322815308

> <r_psp_Receptor_Packing>
-55.8446424272089

> <r_psp_Receptor_SelfCont>
-40.4078915603482

> <r_psp_Receptor_Solv_GB>
-5209.82433123801

> <r_psp_Receptor_vdW>
-4492.60599087205

> <r_psp_MMGBSA_dG_Bind(NS)>
-54.6546452605326

> <r_psp_MMGBSA_dG_Bind(NS)_Coulomb>
57.1744101801814

> <r_psp_MMGBSA_dG_Bind(NS)_Covalent>
-0.00020086811582587

> <r_psp_MMGBSA_dG_Bind(NS)_Hbond>
-0.000984835575764009

> <r_psp_MMGBSA_dG_Bind(NS)_Lipo>
-29.7913524653463

> <r_psp_MMGBSA_dG_Bind(NS)_Packing>
-4.18903482568567e-007

> <r_psp_MMGBSA_dG_Bind(NS)_SelfCont>
0

> <r_psp_MMGBSA_dG_Bind(NS)_Solv_GB>
-42.4606229471392

> <r_psp_MMGBSA_dG_Bind(NS)_vdW>
-39.5758939056432

> <r_psp_Rec_Strain_Energy>
5.0931703299284e-011

> <r_psp_Rec_Strain_Coulomb>
-1.09139364212751e-011

> <r_psp_Rec_Strain_Covalent>
4.09272615797818e-012

> <r_psp_Rec_Strain_Hbond>
-2.27373675443232e-013

> <r_psp_Rec_Strain_Lipo>
-2.72848410531878e-012

> <r_psp_Rec_Strain_Packing>
4.9737991503207e-014

> <r_psp_Rec_Strain_SelfCont>
7.105427357601e-015

> <r_psp_Rec_Strain_Solv_GB>
2.72848410531878e-012

> <r_psp_Rec_Strain_vdW>
4.54747350886464e-012

> <r_psp_Prime_MMGBSA_ligand_efficiency>
-1.64215695262325

> <r_psp_Prime_MMGBSA_ligand_efficiency_sa>
-2.46323542893487

> <r_psp_Prime_MMGBSA_ligand_efficiency_ln>
-10.027034471145

> <i_psp_ExecuteFunction_Internal_Entry_Index>
158

> <b_m_m_glide_XPvisualizer>
1

> <i_qp_#stars>
0

> <i_qp_#amine>
1

> <i_qp_#amidine>
0

> <i_qp_#acid>
0

> <i_qp_#amide>
0

> <i_qp_#rotor>
5

> <i_qp_#rtvFG>
0

> <i_qp_CNS>
0

> <r_qp_mol_MW>
   355.479

> <r_qp_dipole>
     7.739

> <r_qp_SASA>
   683.353

> <r_qp_FOSA>
   433.680

> <r_qp_FISA>
    84.113

> <r_qp_PISA>
   165.560

> <r_qp_WPSA>
     0.000

> <r_qp_volume>
  1208.889

> <r_qp_donorHB>
     3.000

> <r_qp_accptHB>
     6.200

> <r_qp_dip^2/V>
   0.0495421

> <r_qp_ACxDN^.5/SA>
   0.0157147

> <r_qp_glob>
   0.8031145

> <r_qp_QPpolrz>
    40.596

> <r_qp_QPlogPC16>
    11.911

> <r_qp_QPlogPoct>
    21.324

> <r_qp_QPlogPw>
    12.460

> <r_qp_QPlogPo/w>
     3.045

> <r_qp_QPlogS>
    -4.253

> <r_qp_CIQPlogS>
    -3.367

> <r_qp_QPlogHERG>
    -6.234

> <r_qp_QPPCaco>
   393.696

> <r_qp_QPlogBB>
    -0.209

> <r_qp_QPPMDCK>
   199.824

> <r_qp_QPlogKp>
    -4.069

> <r_qp_IP(eV)>
     8.457

> <r_qp_EA(eV)>
     0.462

> <i_qp_#metab>
3

> <r_qp_QPlogKhsa>
     0.384

> <i_qp_HumanOralAbsorption>
3

> <r_qp_PercentHumanOralAbsorption>
    91.221

> <r_qp_SAfluorine>
     0.000

> <r_qp_SAamideO>
     0.000

> <r_qp_PSA>
    74.311

> <i_qp_#NandO>
5

> <i_qp_RuleOfFive>
0

> <i_qp_RuleOfThree>
0

> <i_qp_#ringatoms>
21

> <i_qp_#in34>
0

> <i_qp_#in56>
21

> <i_qp_#noncon>
11

> <i_qp_#nonHatm>
26

> <r_qp_Jm>
0.00169365067624807

> <s_m_subgroupid>
100str_copy1

> <s_m_subgroup_title>
100str

> <b_m_subgroup_collapsed>
0

$$$$
GR-17
                    3D
 Structure written by MMmdl.
 55 58  0  0  1  0            999 V2000
   -3.3280    1.7629   -0.3206 C   0  0  0  0  0  0
   -2.2705    0.8512   -0.2273 C   0  0  0  0  0  0
   -0.9072    1.2577   -0.2095 C   0  0  0  0  0  0
   -0.6181    2.6309   -0.2938 C   0  0  0  0  0  0
   -1.6678    3.5426   -0.3909 C   0  0  0  0  0  0
   -2.9922    3.1143   -0.4023 C   0  0  0  0  0  0
   -0.0943    0.0738   -0.0915 C   0  0  0  0  0  0
   -0.9773   -1.0151   -0.0746 C   0  0  0  0  0  0
   -2.2639   -0.5195   -0.1336 N   0  0  0  0  0  0
    1.4264    0.0842   -0.0199 C   0  0  0  0  0  0
   -0.6801   -2.4262    0.0745 C   0  0  0  0  0  0
   -1.6718   -3.2624   -0.2962 N   0  0  0  0  0  0
   -1.6239   -4.7253   -0.2365 C   0  0  0  0  0  0
   -1.5923   -5.3243    1.1954 C   0  0  0  0  0  0
   -1.5858   -6.8656    1.2208 C   0  0  0  0  0  0
   -2.7088   -7.4690    0.3623 C   0  0  0  0  0  0
   -2.6490   -6.9443   -1.0816 C   0  0  0  0  0  0
   -2.6772   -5.4042   -1.1454 C   0  0  0  0  0  0
    0.4108   -2.8132    0.4947 O   0  0  0  0  0  0
    1.8891    0.5991    1.3651 N   0  3  0  0  0  0
    1.4800   -0.3632    2.5082 C   0  0  0  0  0  0
    1.9208    0.2383    3.8544 C   0  0  0  0  0  0
    3.4282    0.5412    3.8852 C   0  0  0  0  0  0
    3.8516    1.4285    2.7019 C   0  0  0  0  0  0
    3.4183    0.8349    1.3494 C   0  0  0  0  0  0
   -4.3603    1.4449   -0.3303 H   0  0  0  0  0  0
    0.4033    2.9821   -0.2838 H   0  0  0  0  0  0
   -1.4509    4.5989   -0.4568 H   0  0  0  0  0  0
   -3.7806    3.8492   -0.4767 H   0  0  0  0  0  0
   -3.0706   -1.1264   -0.1088 H   0  0  0  0  0  0
    1.9062   -0.8858   -0.1524 H   0  0  0  0  0  0
    1.8554    0.7736   -0.7486 H   0  0  0  0  0  0
   -2.5575   -2.8649   -0.5714 H   0  0  0  0  0  0
   -0.6672   -5.0111   -0.6819 H   0  0  0  0  0  0
   -0.7236   -4.9592    1.7446 H   0  0  0  0  0  0
   -2.4746   -4.9826    1.7389 H   0  0  0  0  0  0
   -0.6218   -7.2275    0.8596 H   0  0  0  0  0  0
   -1.6742   -7.2187    2.2490 H   0  0  0  0  0  0
   -2.6347   -8.5572    0.3658 H   0  0  0  0  0  0
   -3.6777   -7.2271    0.8018 H   0  0  0  0  0  0
   -1.7386   -7.3084   -1.5607 H   0  0  0  0  0  0
   -3.4785   -7.3537   -1.6595 H   0  0  0  0  0  0
   -3.6717   -5.0758   -0.8387 H   0  0  0  0  0  0
   -2.5449   -5.0851   -2.1804 H   0  0  0  0  0  0
    0.3976   -0.4850    2.4696 H   0  0  0  0  0  0
    1.9593   -1.3225    2.3057 H   0  0  0  0  0  0
    1.3563    1.1520    4.0467 H   0  0  0  0  0  0
    1.6669   -0.4495    4.6617 H   0  0  0  0  0  0
    3.6910    1.0262    4.8263 H   0  0  0  0  0  0
    3.9885   -0.3949    3.8585 H   0  0  0  0  0  0
    3.4225    2.4251    2.8159 H   0  0  0  0  0  0
    4.9338    1.5619    2.7114 H   0  0  0  0  0  0
    3.8895   -0.1296    1.1506 H   0  0  0  0  0  0
    3.6324    1.5186    0.5266 H   0  0  0  0  0  0
    1.4450    1.4905    1.5342 H   0  0  0  0  0  0
  1  2  1  0  0  0
  1  6  2  0  0  0
  1 26  1  0  0  0
  2  3  2  0  0  0
  2  9  1  0  0  0
  3  4  1  0  0  0
  3  7  1  0  0  0
  4  5  2  0  0  0
  4 27  1  0  0  0
  5  6  1  0  0  0
  5 28  1  0  0  0
  6 29  1  0  0  0
  7  8  2  0  0  0
  7 10  1  0  0  0
  8  9  1  0  0  0
  8 11  1  0  0  0
  9 30  1  0  0  0
 10 20  1  0  0  0
 10 31  1  0  0  0
 10 32  1  0  0  0
 11 12  1  0  0  0
 11 19  2  0  0  0
 12 13  1  0  0  0
 12 33  1  0  0  0
 13 18  1  0  0  0
 13 14  1  0  0  0
 13 34  1  0  0  0
 14 15  1  0  0  0
 14 35  1  0  0  0
 14 36  1  0  0  0
 15 16  1  0  0  0
 15 37  1  0  0  0
 15 38  1  0  0  0
 16 17  1  0  0  0
 16 39  1  0  0  0
 16 40  1  0  0  0
 17 18  1  0  0  0
 17 41  1  0  0  0
 17 42  1  0  0  0
 18 43  1  0  0  0
 18 44  1  0  0  0
 20 25  1  0  0  0
 20 21  1  0  0  0
 20 55  1  0  0  0
 21 22  1  0  0  0
 21 45  1  0  0  0
 21 46  1  0  0  0
 22 23  1  0  0  0
 22 47  1  0  0  0
 22 48  1  0  0  0
 23 24  1  0  0  0
 23 49  1  0  0  0
 23 50  1  0  0  0
 24 25  1  0  0  0
 24 51  1  0  0  0
 24 52  1  0  0  0
 25 53  1  0  0  0
 25 54  1  0  0  0
M  CHG  1  20   1
M  END
> <s_m_entry_id>
8190

> <s_m_entry_name>
entry

> <i_f3d_flags>
0

> <s_m_job_name>
adme_1000

> <r_psp_Prime_Energy>
-34931.6120755765

> <r_psp_Prime_Solv_GB>
-5281.71399156431

> <r_psp_Prime_Coulomb>
-26385.2543315736

> <r_psp_Prime_vdW>
-4519.81674742635

> <r_psp_Prime_Covalent>
4045.14804231227

> <i_psp_model_num>
0

> <r_psp_Prime_Lipo>
-2143.22833977759

> <s_psp_Prime_Energy_Force_Field>
OPLS3e

> <s_psp_Prime_Energy_Solvent_Model>
VSGB2.1

> <r_psp_Prime_Hbond>
-550.494173559436

> <r_psp_Prime_Packing>
-55.8446424272089

> <r_psp_Prime_SelfCont>
-40.4078915603482

> <r_psp_Memb1_x>
103.457542316003

> <r_psp_Memb1_y>
39.4731108300965

> <r_psp_Memb1_z>
48.7987221124676

> <r_psp_Memb2_x>
99.8134167309003

> <r_psp_Memb2_y>
2.81176945184187

> <r_psp_Memb2_z>
23.8404289603493

> <r_psp_MembDummyRadius>
4.45

> <r_psp_Prime_Bond_Covalent>
467.665321864229

> <r_psp_Prime_Bond_SGB>
49977.0713540652

> <r_psp_Prime_Angle_Covalent>
2228.43017986081

> <r_psp_Prime_Angle_SGB>
-21637.8011546912

> <r_psp_Prime_Torsion_Covalent>
1349.05254058723

> <r_psp_Prime_NB14_LJ>
4082.53099080521

> <r_psp_Prime_NB14_Lipo>
0

> <r_psp_Prime_NB14_Elec>
25562.5910485973

> <r_psp_Prime_NB14_SGB>
-15611.3063007902

> <r_psp_Prime_NBShort_LJ>
-8195.25720811045

> <r_psp_Prime_NBShort_Lipo>
-2143.22833977759

> <r_psp_Prime_NBShort_Elec>
-53013.8233844701

> <r_psp_Prime_NBShort_SGB>
17979.3142147239

> <r_psp_Prime_NBLong_LJ>
-407.090530121106

> <r_psp_Prime_NBLong_Lipo>
0

> <r_psp_Prime_NBLong_Elec>
1065.97800429919

> <r_psp_Prime_NBLong_SGB>
-1226.33225006486

> <r_psp_Prime_Self_SGB>
-34762.6598548072

> <s_m_Source_Path>
F:\Dekstop_files\DAC4,5\Molecular Systems Desgn and Engineering\supplementary_str

> <s_m_Source_File>
1000_str.mae

> <i_m_Source_File_Index>
644

> <i_lp_mmshare_version>
53156

> <s_epik_input>
W0NIMl0xW0NIMl1bQ0gyXVtDSDJdW0NIMl1OMVtDSDJdYyhjKGMyMylbY0hdW2NIXVtjSF1bY0hdMiljKFtuSF0zKUMoPU8pW05IXVtDSF00W0NIMl1bQ0gyXVtDSDJdW0NIMl1bQ0gyXTQ=

> <s_epik_cmdline>
J2VwaWtfcHl0aG9uJywgJy1waHQnLCAnMC4wJywgJy1waCcsICc3LjAnLCAnLXRuJywgJzgnLCAnLW1hJywgJzUwMCcsICctaW1hZScsICc8aW5maWxlLm1hZT4nLCAnLW9tYWUnLCAnPG91dGZpbGUubWFlPic=

> <r_lp_tautomer_probability>
1

> <r_epik_Ionization_Penalty>
  0.0118

> <r_epik_Ionization_Penalty_Charging>
  0.0118

> <r_epik_Ionization_Penalty_Neutral>
  0.0000

> <r_epik_State_Penalty>
  0.0000

> <r_epik_Charging_Adjusted_Penalty>
0.0117614320117395

> <i_epik_Tot_Q>
1

> <i_epik_Tot_abs_Q>
1

> <s_lp_Force_Field>
S-OPLS

> <r_lp_Energy>
42.598282

> <b_lp_Chiralities_Consistent>
1

> <s_lp_Variant>
GR-17-1

> <s_i_glide_gridfile>
glide-grid_1_oct_mmpl3_after_loop_refinement

> <i_i_glide_lignum>
14

> <i_i_glide_rotatable_bonds>
5

> <r_i_docking_score>
-6.34048346719644

> <r_i_glide_ligand_efficiency>
-0.253619338687858

> <r_i_glide_ligand_efficiency_sa>
-0.741587444281419

> <r_i_glide_ligand_efficiency_ln>
-1.50288459068229

> <r_glide_XP_GScore>
-6.34048346719644

> <r_i_glide_gscore>
-6.34048346719644

> <r_i_glide_evdw>
-38.9224853515625

> <r_i_glide_ecoul>
-1.30703663825989

> <r_i_glide_energy>
-40.2295219898224

> <r_i_glide_einternal>
11.4484977722168

> <r_i_glide_emodel>
-45.4965516608408

> <r_glide_XP_HBond>
0

> <r_glide_XP_PhobEn>
-2.44100021584475

> <r_glide_XP_PhobEnHB>
0

> <r_glide_XP_LowMW>
-0.365058666666666

> <r_glide_XP_RotPenal>
0.35005484484228

> <r_glide_XP_LipophilicEvdW>
-6.53631993527603

> <r_glide_XP_PhobEnPairHB>
0

> <r_glide_XP_Electro>
-0.0980277478694916

> <r_glide_XP_Sitemap>
-0.25344086589107

> <r_glide_XP_Penalties>
3.00330911950928

> <r_glide_XP_PiStack>
0

> <r_glide_XP_HBPenal>
0

> <r_glide_XP_ExposPenal>
0

> <r_glide_XP_PiCat>
0

> <r_glide_XP_ClBr>
0

> <r_glide_XP_Zpotr>
0

> <i_i_glide_confnum>
1

> <i_i_glide_posenum>
1

> <r_i_glide_eff_state_penalty>
0

> <i_glide_XP_PoseRank>
1

> <r_i_glide_rmsd_to_input>
109.563937269966

> <s_psp_Prime_MMGBSA_Input_Structure_Hash>
b539836638341e816bed1aebc3d083e96cccfd189f5f107b1d2a8df3

> <i_psp_number_heavy_atoms>
25

> <r_psp_MMGBSA_dG_Bind>
-54.200893260022

> <r_psp_MMGBSA_dG_Bind_Coulomb>
58.1176797425978

> <r_psp_MMGBSA_dG_Bind_Covalent>
9.57893435365895

> <r_psp_MMGBSA_dG_Bind_Hbond>
-0.39656847625497

> <r_psp_MMGBSA_dG_Bind_Lipo>
-28.0592133919718

> <r_psp_MMGBSA_dG_Bind_Packing>
4.9737991503207e-014

> <r_psp_MMGBSA_dG_Bind_SelfCont>
7.105427357601e-015

> <r_psp_MMGBSA_dG_Bind_Solv_GB>
-53.5455260661547

> <r_psp_MMGBSA_dG_Bind_vdW>
-39.896199421958

> <r_psp_Lig_Strain_Energy>
16.1714690987378

> <r_psp_Lig_Strain_Coulomb>
2.95043672430494

> <r_psp_Lig_Strain_Covalent>
9.57913522177137

> <r_psp_Lig_Strain_Hbond>
0

> <r_psp_Lig_Strain_Lipo>
-0.137761170241298

> <r_psp_Lig_Strain_Packing>
0

> <r_psp_Lig_Strain_SelfCont>
0

> <r_psp_Lig_Strain_Solv_GB>
-1.6254898145237

> <r_psp_Lig_Strain_vdW>
5.40514813742649

> <r_psp_Ligand_Energy>
36.3355944742893

> <r_psp_Ligand_Coulomb>
17.2664171099183

> <r_psp_Ligand_Covalent>
26.4137669893856

> <r_psp_Ligand_Hbond>
0

> <r_psp_Ligand_Lipo>
-1.68589823253618

> <r_psp_Ligand_Packing>
0

> <r_psp_Ligand_SelfCont>
0

> <r_psp_Ligand_Solv_GB>
-18.3441342601412

> <r_psp_Ligand_vdW>
12.6854428676628

> <r_psp_Complex_Energy>
-34931.6120755765

> <r_psp_Complex_Coulomb>
-26385.2543315736

> <r_psp_Complex_Covalent>
4045.14804231227

> <r_psp_Complex_Hbond>
-550.494173559436

> <r_psp_Complex_Lipo>
-2143.22833977759

> <r_psp_Complex_Packing>
-55.8446424272089

> <r_psp_Complex_SelfCont>
-40.4078915603482

> <r_psp_Complex_Solv_GB>
-5281.71399156431

> <r_psp_Complex_vdW>
-4519.81674742635

> <r_psp_Receptor_Energy>
-34913.7467767908

> <r_psp_Receptor_Coulomb>
-26460.6384284261

> <r_psp_Receptor_Covalent>
4009.15534096923

> <r_psp_Receptor_Hbond>
-550.097605083181

> <r_psp_Receptor_Lipo>
-2113.48322815308

> <r_psp_Receptor_Packing>
-55.8446424272089

> <r_psp_Receptor_SelfCont>
-40.4078915603482

> <r_psp_Receptor_Solv_GB>
-5209.82433123801

> <r_psp_Receptor_vdW>
-4492.60599087205

> <r_psp_MMGBSA_dG_Bind(NS)>
-70.3723623588157

> <r_psp_MMGBSA_dG_Bind(NS)_Coulomb>
55.1672430183025

> <r_psp_MMGBSA_dG_Bind(NS)_Covalent>
-0.000200868116280617

> <r_psp_MMGBSA_dG_Bind(NS)_Hbond>
-0.396568476254743

> <r_psp_MMGBSA_dG_Bind(NS)_Lipo>
-27.9214522217276

> <r_psp_MMGBSA_dG_Bind(NS)_Packing>
0

> <r_psp_MMGBSA_dG_Bind(NS)_SelfCont>
0

> <r_psp_MMGBSA_dG_Bind(NS)_Solv_GB>
-51.9200362516331

> <r_psp_MMGBSA_dG_Bind(NS)_vdW>
-45.3013475593898

> <r_psp_Rec_Strain_Energy>
5.0931703299284e-011

> <r_psp_Rec_Strain_Coulomb>
-1.09139364212751e-011

> <r_psp_Rec_Strain_Covalent>
4.09272615797818e-012

> <r_psp_Rec_Strain_Hbond>
-2.27373675443232e-013

> <r_psp_Rec_Strain_Lipo>
-2.72848410531878e-012

> <r_psp_Rec_Strain_Packing>
4.9737991503207e-014

> <r_psp_Rec_Strain_SelfCont>
7.105427357601e-015

> <r_psp_Rec_Strain_Solv_GB>
2.72848410531878e-012

> <r_psp_Rec_Strain_vdW>
4.54747350886464e-012

> <r_psp_Prime_MMGBSA_ligand_efficiency>
-2.16803573040088

> <r_psp_Prime_MMGBSA_ligand_efficiency_sa>
-3.25205359560132

> <r_psp_Prime_MMGBSA_ligand_efficiency_ln>
-12.8472359723257

> <i_psp_ExecuteFunction_Internal_Entry_Index>
176

> <b_m_m_glide_XPvisualizer>
1

> <i_qp_#stars>
0

> <i_qp_#amine>
1

> <i_qp_#amidine>
0

> <i_qp_#acid>
0

> <i_qp_#amide>
0

> <i_qp_#rotor>
4

> <i_qp_#rtvFG>
0

> <i_qp_CNS>
1

> <r_qp_mol_MW>
   339.480

> <r_qp_dipole>
     5.808

> <r_qp_SASA>
   675.413

> <r_qp_FOSA>
   466.115

> <r_qp_FISA>
    42.329

> <r_qp_PISA>
   166.969

> <r_qp_WPSA>
     0.000

> <r_qp_volume>
  1191.478

> <r_qp_donorHB>
     2.000

> <r_qp_accptHB>
     4.500

> <r_qp_dip^2/V>
   0.0283148

> <r_qp_ACxDN^.5/SA>
   0.0094223

> <r_qp_glob>
   0.8047356

> <r_qp_QPpolrz>
    40.555

> <r_qp_QPlogPC16>
    11.230

> <r_qp_QPlogPoct>
    18.477

> <r_qp_QPlogPw>
     9.248

> <r_qp_QPlogPo/w>
     4.071

> <r_qp_QPlogS>
    -4.928

> <r_qp_CIQPlogS>
    -3.741

> <r_qp_QPlogHERG>
    -6.214

> <r_qp_QPPCaco>
   980.381

> <r_qp_QPlogBB>
     0.285

> <r_qp_QPPMDCK>
   535.709

> <r_qp_QPlogKp>
    -3.390

> <r_qp_IP(eV)>
     8.331

> <r_qp_EA(eV)>
     0.375

> <i_qp_#metab>
2

> <r_qp_QPlogKhsa>
     0.742

> <i_qp_HumanOralAbsorption>
3

> <r_qp_PercentHumanOralAbsorption>
   100.000

> <r_qp_SAfluorine>
     0.000

> <r_qp_SAamideO>
     0.000

> <r_qp_PSA>
    52.640

> <i_qp_#NandO>
4

> <i_qp_RuleOfFive>
0

> <i_qp_RuleOfThree>
0

> <i_qp_#ringatoms>
21

> <i_qp_#in34>
0

> <i_qp_#in56>
21

> <i_qp_#noncon>
11

> <i_qp_#nonHatm>
25

> <r_qp_Jm>
0.0016322459026627

> <s_m_subgroupid>
100str_copy1

> <s_m_subgroup_title>
100str

> <b_m_subgroup_collapsed>
0

$$$$
GR-19
                    3D
 Structure written by MMmdl.
 54 56  0  0  1  0            999 V2000
   -1.6628    4.6827    1.7190 C   0  0  0  0  0  0
   -1.2917    3.6439    0.8579 C   0  0  0  0  0  0
   -0.9592    2.3416    1.3254 C   0  0  0  0  0  0
   -1.0124    2.0955    2.7087 C   0  0  0  0  0  0
   -1.3840    3.1261    3.5701 C   0  0  0  0  0  0
   -1.7005    4.3909    3.0825 C   0  0  0  0  0  0
   -0.6144    1.5366    0.1805 C   0  0  0  0  0  0
   -0.7804    2.3539   -0.9456 C   0  0  0  0  0  0
   -1.1612    3.6066   -0.5092 N   0  0  0  0  0  0
   -0.1931    0.0748    0.2455 C   0  0  0  0  0  0
   -0.5336    2.0372   -2.3397 C   0  0  0  0  0  0
   -1.0211    2.9291   -3.2265 N   0  0  0  0  0  0
   -0.8781    2.8555   -4.6821 C   0  0  0  0  0  0
   -1.9320    3.7028   -5.4355 C   0  0  0  0  0  0
   -1.7786    3.6658   -6.9688 C   0  0  0  0  0  0
   -0.3457    3.9939   -7.4180 C   0  0  0  0  0  0
    0.6755    3.0629   -6.7449 C   0  0  0  0  0  0
    0.5645    3.0850   -5.2076 C   0  0  0  0  0  0
    0.0704    1.0156   -2.6693 O   0  0  0  0  0  0
    1.3313   -0.0682   -0.0052 N   0  3  0  0  0  0
    1.7412   -1.5437   -0.2500 C   0  0  0  0  0  0
    1.2735   -2.0364   -1.6303 C   0  0  0  0  0  0
    2.1853    0.5996    1.1049 C   0  0  0  0  0  0
    3.6120    0.8953    0.6114 C   0  0  0  0  0  0
   -1.9109    5.6688    1.3548 H   0  0  0  0  0  0
   -0.7673    1.1222    3.1073 H   0  0  0  0  0  0
   -1.4262    2.9419    4.6337 H   0  0  0  0  0  0
   -1.9832    5.1666    3.7795 H   0  0  0  0  0  0
   -1.3166    4.3703   -1.1510 H   0  0  0  0  0  0
   -0.3786   -0.4035    1.2086 H   0  0  0  0  0  0
   -0.6924   -0.5090   -0.5255 H   0  0  0  0  0  0
   -1.4597    3.7662   -2.8727 H   0  0  0  0  0  0
   -1.1185    1.8259   -4.9603 H   0  0  0  0  0  0
   -2.9388    3.3780   -5.1676 H   0  0  0  0  0  0
   -1.8398    4.7429   -5.1180 H   0  0  0  0  0  0
   -2.0543    2.6756   -7.3353 H   0  0  0  0  0  0
   -2.4802    4.3637   -7.4278 H   0  0  0  0  0  0
   -0.2675    3.9099   -8.5027 H   0  0  0  0  0  0
   -0.1131    5.0318   -7.1746 H   0  0  0  0  0  0
    0.5242    2.0428   -7.1016 H   0  0  0  0  0  0
    1.6861    3.3412   -7.0465 H   0  0  0  0  0  0
    0.9127    4.0595   -4.8615 H   0  0  0  0  0  0
    1.2460    2.3413   -4.7924 H   0  0  0  0  0  0
    2.8278   -1.5806   -0.2043 H   0  0  0  0  0  0
    1.3350   -2.1246    0.5798 H   0  0  0  0  0  0
    1.6784   -3.0278   -1.8346 H   0  0  0  0  0  0
    1.6167   -1.3756   -2.4274 H   0  0  0  0  0  0
    0.1897   -2.1186   -1.7035 H   0  0  0  0  0  0
    1.6969    1.5389    1.3585 H   0  0  0  0  0  0
    2.1486   -0.0624    1.9716 H   0  0  0  0  0  0
    4.1570    1.4736    1.3578 H   0  0  0  0  0  0
    3.6003    1.4820   -0.3081 H   0  0  0  0  0  0
    4.1926   -0.0079    0.4286 H   0  0  0  0  0  0
    1.5243    0.4334   -0.8612 H   0  0  0  0  0  0
  1  2  1  0  0  0
  1  6  2  0  0  0
  1 25  1  0  0  0
  2  3  2  0  0  0
  2  9  1  0  0  0
  3  4  1  0  0  0
  3  7  1  0  0  0
  4  5  2  0  0  0
  4 26  1  0  0  0
  5  6  1  0  0  0
  5 27  1  0  0  0
  6 28  1  0  0  0
  7  8  2  0  0  0
  7 10  1  0  0  0
  8  9  1  0  0  0
  8 11  1  0  0  0
  9 29  1  0  0  0
 10 20  1  0  0  0
 10 30  1  0  0  0
 10 31  1  0  0  0
 11 12  1  0  0  0
 11 19  2  0  0  0
 12 13  1  0  0  0
 12 32  1  0  0  0
 13 18  1  0  0  0
 13 14  1  0  0  0
 13 33  1  0  0  0
 14 15  1  0  0  0
 14 34  1  0  0  0
 14 35  1  0  0  0
 15 16  1  0  0  0
 15 36  1  0  0  0
 15 37  1  0  0  0
 16 17  1  0  0  0
 16 38  1  0  0  0
 16 39  1  0  0  0
 17 18  1  0  0  0
 17 40  1  0  0  0
 17 41  1  0  0  0
 18 42  1  0  0  0
 18 43  1  0  0  0
 20 21  1  0  0  0
 20 23  1  0  0  0
 20 54  1  0  0  0
 21 22  1  0  0  0
 21 44  1  0  0  0
 21 45  1  0  0  0
 22 46  1  0  0  0
 22 47  1  0  0  0
 22 48  1  0  0  0
 23 24  1  0  0  0
 23 49  1  0  0  0
 23 50  1  0  0  0
 24 51  1  0  0  0
 24 52  1  0  0  0
 24 53  1  0  0  0
M  CHG  1  20   1
M  END
> <s_m_entry_id>
8191

> <s_m_entry_name>
entry

> <i_f3d_flags>
0

> <s_m_job_name>
adme_1000

> <r_psp_Prime_Energy>
-34944.1973638949

> <r_psp_Prime_Solv_GB>
-5293.42714362139

> <r_psp_Prime_Coulomb>
-26386.1343264428

> <r_psp_Prime_vdW>
-4524.50451823349

> <r_psp_Prime_Covalent>
4048.62858710176

> <i_psp_model_num>
0

> <r_psp_Prime_Lipo>
-2142.39128511239

> <s_psp_Prime_Energy_Force_Field>
OPLS3e

> <s_psp_Prime_Energy_Solvent_Model>
VSGB2.1

> <r_psp_Prime_Hbond>
-550.10834359243

> <r_psp_Prime_Packing>
-55.8524424338897

> <r_psp_Prime_SelfCont>
-40.4078915603482

> <r_psp_Memb1_x>
103.457542316003

> <r_psp_Memb1_y>
39.4731108300965

> <r_psp_Memb1_z>
48.7987221124676

> <r_psp_Memb2_x>
99.8134167309003

> <r_psp_Memb2_y>
2.81176945184187

> <r_psp_Memb2_z>
23.8404289603493

> <r_psp_MembDummyRadius>
4.45

> <r_psp_Prime_Bond_Covalent>
467.930834636483

> <r_psp_Prime_Bond_SGB>
49979.3626046222

> <r_psp_Prime_Angle_Covalent>
2236.25491839364

> <r_psp_Prime_Angle_SGB>
-21642.0880552529

> <r_psp_Prime_Torsion_Covalent>
1344.44283407164

> <r_psp_Prime_NB14_LJ>
4077.59019525183

> <r_psp_Prime_NB14_Lipo>
0

> <r_psp_Prime_NB14_Elec>
25560.9196696075

> <r_psp_Prime_NB14_SGB>
-15610.821841523

> <r_psp_Prime_NBShort_LJ>
-8194.56191972123

> <r_psp_Prime_NBShort_Lipo>
-2142.39128511239

> <r_psp_Prime_NBShort_Elec>
-53030.4150401276

> <r_psp_Prime_NBShort_SGB>
17989.6632444453

> <r_psp_Prime_NBLong_LJ>
-407.532793764093

> <r_psp_Prime_NBLong_Lipo>
0

> <r_psp_Prime_NBLong_Elec>
1083.36104407741

> <r_psp_Prime_NBLong_SGB>
-1246.00960965528

> <r_psp_Prime_Self_SGB>
-34763.5334862578

> <s_m_Source_Path>
F:\Dekstop_files\DAC4,5\Molecular Systems Desgn and Engineering\supplementary_str

> <s_m_Source_File>
1000_str.mae

> <i_m_Source_File_Index>
645

> <i_lp_mmshare_version>
53156

> <s_epik_input>
W2NIXTFbY0hdW2NIXVtjSF1jKGMxMiljKFtDSDJdTihbQ0gyXVtDSDNdKVtDSDJdW0NIM10pYyhbbkhdMilDKD1PKVtOSF1bQ0hdM1tDSDJdW0NIMl1bQ0gyXVtDSDJdW0NIMl0z

> <s_epik_cmdline>
J2VwaWtfcHl0aG9uJywgJy1waHQnLCAnMC4wJywgJy1waCcsICc3LjAnLCAnLXRuJywgJzgnLCAnLW1hJywgJzUwMCcsICctaW1hZScsICc8aW5maWxlLm1hZT4nLCAnLW9tYWUnLCAnPG91dGZpbGUubWFlPic=

> <r_lp_tautomer_probability>
1

> <r_epik_Ionization_Penalty>
  0.0239

> <r_epik_Ionization_Penalty_Charging>
  0.0239

> <r_epik_Ionization_Penalty_Neutral>
  0.0000

> <r_epik_State_Penalty>
  0.0000

> <r_epik_Charging_Adjusted_Penalty>
0.0238779594741381

> <i_epik_Tot_Q>
1

> <i_epik_Tot_abs_Q>
1

> <s_lp_Force_Field>
S-OPLS

> <r_lp_Energy>
39.885037

> <b_lp_Chiralities_Consistent>
1

> <s_lp_Variant>
GR-19-1

> <s_i_glide_gridfile>
glide-grid_1_oct_mmpl3_after_loop_refinement

> <i_i_glide_lignum>
16

> <i_i_glide_rotatable_bonds>
7

> <r_i_docking_score>
-5.98250577847747

> <r_i_glide_ligand_efficiency>
-0.249271074103228

> <r_i_glide_ligand_efficiency_sa>
-0.719022198269196

> <r_i_glide_ligand_efficiency_ln>
-1.43188815209191

> <r_glide_XP_GScore>
-5.98250577847747

> <r_i_glide_gscore>
-5.98250577847747

> <r_i_glide_evdw>
-36.7783012390137

> <r_i_glide_ecoul>
-0.931939840316772

> <r_i_glide_energy>
-37.7102410793304

> <r_i_glide_einternal>
7.06909370422363

> <r_i_glide_emodel>
-37.2467276226439

> <r_glide_XP_HBond>
0

> <r_glide_XP_PhobEn>
-2.32930140190346

> <r_glide_XP_PhobEnHB>
0

> <r_glide_XP_LowMW>
-0.405094333333332

> <r_glide_XP_RotPenal>
0.373026100128801

> <r_glide_XP_LipophilicEvdW>
-6.28797088278556

> <r_glide_XP_PhobEnPairHB>
0

> <r_glide_XP_Electro>
-0.0698954880237579

> <r_glide_XP_Sitemap>
-0.263430302946096

> <r_glide_XP_Penalties>
3.00016053038594

> <r_glide_XP_PiStack>
0

> <r_glide_XP_HBPenal>
0

> <r_glide_XP_ExposPenal>
0

> <r_glide_XP_PiCat>
0

> <r_glide_XP_ClBr>
0

> <r_glide_XP_Zpotr>
0

> <i_i_glide_confnum>
1

> <i_i_glide_posenum>
105

> <r_i_glide_eff_state_penalty>
0

> <i_glide_XP_PoseRank>
1

> <r_i_glide_rmsd_to_input>
110.713809555443

> <s_psp_Prime_MMGBSA_Input_Structure_Hash>
4474cae390a49b47326f302e70d835478b17f266d907c7497cbf9d3f

> <i_psp_number_heavy_atoms>
24

> <r_psp_MMGBSA_dG_Bind>
-52.8433160913264

> <r_psp_MMGBSA_dG_Bind_Coulomb>
71.0778495890809

> <r_psp_MMGBSA_dG_Bind_Covalent>
12.2085073969251

> <r_psp_MMGBSA_dG_Bind_Hbond>
-0.0107385092487675

> <r_psp_MMGBSA_dG_Bind_Lipo>
-26.1531487038237

> <r_psp_MMGBSA_dG_Bind_Packing>
-0.00780000668077463

> <r_psp_MMGBSA_dG_Bind_SelfCont>
7.105427357601e-015

> <r_psp_MMGBSA_dG_Bind_Solv_GB>
-67.6751214438927

> <r_psp_MMGBSA_dG_Bind_vdW>
-42.2828644137535

> <r_psp_Lig_Strain_Energy>
13.4569796197226

> <r_psp_Lig_Strain_Coulomb>
1.30912807471029

> <r_psp_Lig_Strain_Covalent>
12.2087082650373

> <r_psp_Lig_Strain_Hbond>
0

> <r_psp_Lig_Strain_Lipo>
-0.418157658595993

> <r_psp_Lig_Strain_Packing>
0

> <r_psp_Lig_Strain_SelfCont>
0

> <r_psp_Lig_Strain_Solv_GB>
-0.715185887381935

> <r_psp_Lig_Strain_vdW>
1.07248682595285

> <r_psp_Ligand_Energy>
22.3927289871984

> <r_psp_Ligand_Coulomb>
3.42625239425259

> <r_psp_Ligand_Covalent>
27.2647387356064

> <r_psp_Ligand_Hbond>
0

> <r_psp_Ligand_Lipo>
-2.75490825548758

> <r_psp_Ligand_Packing>
0

> <r_psp_Ligand_SelfCont>
0

> <r_psp_Ligand_Solv_GB>
-15.9276909394832

> <r_psp_Ligand_vdW>
10.3843370523102

> <r_psp_Complex_Energy>
-34944.1973638949

> <r_psp_Complex_Coulomb>
-26386.1343264428

> <r_psp_Complex_Covalent>
4048.62858710176

> <r_psp_Complex_Hbond>
-550.10834359243

> <r_psp_Complex_Lipo>
-2142.39128511239

> <r_psp_Complex_Packing>
-55.8524424338897

> <r_psp_Complex_SelfCont>
-40.4078915603482

> <r_psp_Complex_Solv_GB>
-5293.42714362139

> <r_psp_Complex_vdW>
-4524.50451823349

> <r_psp_Receptor_Energy>
-34913.7467767908

> <r_psp_Receptor_Coulomb>
-26460.6384284261

> <r_psp_Receptor_Covalent>
4009.15534096923

> <r_psp_Receptor_Hbond>
-550.097605083181

> <r_psp_Receptor_Lipo>
-2113.48322815308

> <r_psp_Receptor_Packing>
-55.8446424272089

> <r_psp_Receptor_SelfCont>
-40.4078915603482

> <r_psp_Receptor_Solv_GB>
-5209.82433123801

> <r_psp_Receptor_vdW>
-4492.60599087205

> <r_psp_MMGBSA_dG_Bind(NS)>
-66.3002957110948

> <r_psp_MMGBSA_dG_Bind(NS)_Coulomb>
69.7687215143815

> <r_psp_MMGBSA_dG_Bind(NS)_Covalent>
-0.000200868116280617

> <r_psp_MMGBSA_dG_Bind(NS)_Hbond>
-0.0107385092485401

> <r_psp_MMGBSA_dG_Bind(NS)_Lipo>
-25.7349910452249

> <r_psp_MMGBSA_dG_Bind(NS)_Packing>
-0.00780000668082437

> <r_psp_MMGBSA_dG_Bind(NS)_SelfCont>
0

> <r_psp_MMGBSA_dG_Bind(NS)_Solv_GB>
-66.9599355565133

> <r_psp_MMGBSA_dG_Bind(NS)_vdW>
-43.3553512397111

> <r_psp_Rec_Strain_Energy>
5.0931703299284e-011

> <r_psp_Rec_Strain_Coulomb>
-1.09139364212751e-011

> <r_psp_Rec_Strain_Covalent>
4.09272615797818e-012

> <r_psp_Rec_Strain_Hbond>
-2.27373675443232e-013

> <r_psp_Rec_Strain_Lipo>
-2.72848410531878e-012

> <r_psp_Rec_Strain_Packing>
4.9737991503207e-014

> <r_psp_Rec_Strain_SelfCont>
7.105427357601e-015

> <r_psp_Rec_Strain_Solv_GB>
2.72848410531878e-012

> <r_psp_Rec_Strain_vdW>
4.54747350886464e-012

> <r_psp_Prime_MMGBSA_ligand_efficiency>
-2.2018048371386

> <r_psp_Prime_MMGBSA_ligand_efficiency_sa>
-3.3027072557079

> <r_psp_Prime_MMGBSA_ligand_efficiency_ln>
-12.6478303624263

> <i_psp_ExecuteFunction_Internal_Entry_Index>
186

> <b_m_m_glide_XPvisualizer>
1

> <i_qp_#stars>
0

> <i_qp_#amine>
1

> <i_qp_#amidine>
0

> <i_qp_#acid>
0

> <i_qp_#amide>
0

> <i_qp_#rotor>
6

> <i_qp_#rtvFG>
0

> <i_qp_CNS>
1

> <r_qp_mol_MW>
   327.469

> <r_qp_dipole>
     5.736

> <r_qp_SASA>
   675.904

> <r_qp_FOSA>
   473.558

> <r_qp_FISA>
    34.454

> <r_qp_PISA>
   167.892

> <r_qp_WPSA>
     0.000

> <r_qp_volume>
  1183.380

> <r_qp_donorHB>
     2.000

> <r_qp_accptHB>
     4.500

> <r_qp_dip^2/V>
   0.0278049

> <r_qp_ACxDN^.5/SA>
   0.0094155

> <r_qp_glob>
   0.8005028

> <r_qp_QPpolrz>
    38.956

> <r_qp_QPlogPC16>
    11.109

> <r_qp_QPlogPoct>
    17.786

> <r_qp_QPlogPw>
     8.760

> <r_qp_QPlogPo/w>
     4.073

> <r_qp_QPlogS>
    -4.611

> <r_qp_CIQPlogS>
    -3.467

> <r_qp_QPlogHERG>
    -6.287

> <r_qp_QPPCaco>
  1164.327

> <r_qp_QPlogBB>
     0.242

> <r_qp_QPPMDCK>
   645.133

> <r_qp_QPlogKp>
    -3.050

> <r_qp_IP(eV)>
     8.364

> <r_qp_EA(eV)>
     0.379

> <i_qp_#metab>
2

> <r_qp_QPlogKhsa>
     0.634

> <i_qp_HumanOralAbsorption>
3

> <r_qp_PercentHumanOralAbsorption>
   100.000

> <r_qp_SAfluorine>
     0.000

> <r_qp_SAamideO>
     0.000

> <r_qp_PSA>
    51.532

> <i_qp_#NandO>
4

> <i_qp_RuleOfFive>
0

> <i_qp_RuleOfThree>
0

> <i_qp_#ringatoms>
15

> <i_qp_#in34>
0

> <i_qp_#in56>
15

> <i_qp_#noncon>
6

> <i_qp_#nonHatm>
24

> <r_qp_Jm>
0.00715362052656693

> <s_m_subgroupid>
100str_copy1

> <s_m_subgroup_title>
100str

> <b_m_subgroup_collapsed>
0

$$$$
GR-20
                    3D
 Structure written by MMmdl.
 51 53  0  0  1  0            999 V2000
   -0.7461    5.0345   -1.4377 C   0  0  0  0  0  0
   -0.8266    3.8355   -0.7209 C   0  0  0  0  0  0
   -0.2671    2.6171   -1.1988 C   0  0  0  0  0  0
    0.3904    2.6267   -2.4415 C   0  0  0  0  0  0
    0.4741    3.8190   -3.1585 C   0  0  0  0  0  0
   -0.0830    4.9950   -2.6642 C   0  0  0  0  0  0
   -0.5277    1.5970   -0.2146 C   0  0  0  0  0  0
   -1.2435    2.2145    0.8201 C   0  0  0  0  0  0
   -1.3948    3.5474    0.4965 N   0  0  0  0  0  0
   -0.0995    0.1465   -0.3425 C   0  0  0  0  0  0
   -1.6928    1.6434    2.0752 C   0  0  0  0  0  0
   -2.5835    2.3891    2.7611 N   0  0  0  0  0  0
   -3.1496    2.0565    4.0705 C   0  0  0  0  0  0
   -2.1381    2.0947    5.2479 C   0  0  0  0  0  0
   -2.7723    1.7920    6.6194 C   0  0  0  0  0  0
   -4.0125    2.6580    6.8915 C   0  0  0  0  0  0
   -5.0498    2.5102    5.7666 C   0  0  0  0  0  0
   -4.4557    2.8279    4.3800 C   0  0  0  0  0  0
   -1.2777    0.5514    2.4667 O   0  0  0  0  0  0
    1.2292   -0.0192    0.4134 N   0  3  0  0  0  0
    1.7727   -1.4585    0.5073 C   0  0  0  0  0  0
    2.9107   -1.4718    1.5415 C   0  0  0  0  0  0
    2.2244   -1.9502   -0.8811 C   0  0  0  0  0  0
   -1.1737    5.9545   -1.0665 H   0  0  0  0  0  0
    0.8298    1.7249   -2.8419 H   0  0  0  0  0  0
    0.9796    3.8320   -4.1133 H   0  0  0  0  0  0
    0.0012    5.9010   -3.2467 H   0  0  0  0  0  0
   -1.8669    4.1953    1.1102 H   0  0  0  0  0  0
   -0.7876   -0.5602    0.1231 H   0  0  0  0  0  0
    0.0916   -0.1622   -1.3699 H   0  0  0  0  0  0
   -2.8391    3.2925    2.3913 H   0  0  0  0  0  0
   -3.4674    1.0125    4.0058 H   0  0  0  0  0  0
   -1.3204    1.3941    5.0744 H   0  0  0  0  0  0
   -1.6943    3.0904    5.2962 H   0  0  0  0  0  0
   -3.0515    0.7380    6.6623 H   0  0  0  0  0  0
   -2.0349    1.9411    7.4091 H   0  0  0  0  0  0
   -4.4578    2.3801    7.8476 H   0  0  0  0  0  0
   -3.7171    3.7044    6.9840 H   0  0  0  0  0  0
   -5.4402    1.4912    5.7676 H   0  0  0  0  0  0
   -5.9034    3.1605    5.9619 H   0  0  0  0  0  0
   -4.2489    3.8988    4.3450 H   0  0  0  0  0  0
   -5.2050    2.6255    3.6132 H   0  0  0  0  0  0
    0.9304   -2.0446    0.8790 H   0  0  0  0  0  0
    3.2999   -2.4816    1.6770 H   0  0  0  0  0  0
    2.5704   -1.1254    2.5188 H   0  0  0  0  0  0
    3.7454   -0.8390    1.2352 H   0  0  0  0  0  0
    2.6516   -2.9515   -0.8152 H   0  0  0  0  0  0
    2.9860   -1.2992   -1.3129 H   0  0  0  0  0  0
    1.3949   -2.0102   -1.5857 H   0  0  0  0  0  0
    1.9299    0.5720   -0.0104 H   0  0  0  0  0  0
    1.0768    0.3109    1.3562 H   0  0  0  0  0  0
  1  2  1  0  0  0
  1  6  2  0  0  0
  1 24  1  0  0  0
  2  3  2  0  0  0
  2  9  1  0  0  0
  3  4  1  0  0  0
  3  7  1  0  0  0
  4  5  2  0  0  0
  4 25  1  0  0  0
  5  6  1  0  0  0
  5 26  1  0  0  0
  6 27  1  0  0  0
  7  8  2  0  0  0
  7 10  1  0  0  0
  8  9  1  0  0  0
  8 11  1  0  0  0
  9 28  1  0  0  0
 10 20  1  0  0  0
 10 29  1  0  0  0
 10 30  1  0  0  0
 11 12  1  0  0  0
 11 19  2  0  0  0
 12 13  1  0  0  0
 12 31  1  0  0  0
 13 18  1  0  0  0
 13 14  1  0  0  0
 13 32  1  0  0  0
 14 15  1  0  0  0
 14 33  1  0  0  0
 14 34  1  0  0  0
 15 16  1  0  0  0
 15 35  1  0  0  0
 15 36  1  0  0  0
 16 17  1  0  0  0
 16 37  1  0  0  0
 16 38  1  0  0  0
 17 18  1  0  0  0
 17 39  1  0  0  0
 17 40  1  0  0  0
 18 41  1  0  0  0
 18 42  1  0  0  0
 20 21  1  0  0  0
 20 50  1  0  0  0
 20 51  1  0  0  0
 21 22  1  0  0  0
 21 23  1  0  0  0
 21 43  1  0  0  0
 22 44  1  0  0  0
 22 45  1  0  0  0
 22 46  1  0  0  0
 23 47  1  0  0  0
 23 48  1  0  0  0
 23 49  1  0  0  0
M  CHG  1  20   1
M  END
> <s_m_entry_id>
8192

> <s_m_entry_name>
entry

> <i_f3d_flags>
0

> <s_m_job_name>
adme_1000

> <r_psp_Prime_Energy>
-34938.5970322005

> <r_psp_Prime_Solv_GB>
-5303.80950574645

> <r_psp_Prime_Coulomb>
-26380.6257202093

> <r_psp_Prime_vdW>
-4504.94964427065

> <r_psp_Prime_Covalent>
4039.90336526863

> <i_psp_model_num>
0

> <r_psp_Prime_Lipo>
-2140.20769918068

> <s_psp_Prime_Energy_Force_Field>
OPLS3e

> <s_psp_Prime_Energy_Solvent_Model>
VSGB2.1

> <r_psp_Prime_Hbond>
-550.669890081853

> <r_psp_Prime_Packing>
-57.8300464197999

> <r_psp_Prime_SelfCont>
-40.4078915603482

> <r_psp_Memb1_x>
103.457542316003

> <r_psp_Memb1_y>
39.4731108300965

> <r_psp_Memb1_z>
48.7987221124676

> <r_psp_Memb2_x>
99.8134167309003

> <r_psp_Memb2_y>
2.81176945184187

> <r_psp_Memb2_z>
23.8404289603493

> <r_psp_MembDummyRadius>
4.45

> <r_psp_Prime_Bond_Covalent>
467.797673506537

> <r_psp_Prime_Bond_SGB>
49983.2269592912

> <r_psp_Prime_Angle_Covalent>
2225.41045921882

> <r_psp_Prime_Angle_SGB>
-21645.3028756481

> <r_psp_Prime_Torsion_Covalent>
1346.69523254328

> <r_psp_Prime_NB14_LJ>
4080.12384067706

> <r_psp_Prime_NB14_Lipo>
0

> <r_psp_Prime_NB14_Elec>
25541.9768680013

> <r_psp_Prime_NB14_SGB>
-15610.7236403985

> <r_psp_Prime_NBShort_LJ>
-8177.55430684242

> <r_psp_Prime_NBShort_Lipo>
-2140.20769918068

> <r_psp_Prime_NBShort_Elec>
-53005.0057356207

> <r_psp_Prime_NBShort_SGB>
17980.2462927784

> <r_psp_Prime_NBLong_LJ>
-407.519178105286

> <r_psp_Prime_NBLong_Lipo>
0

> <r_psp_Prime_NBLong_Elec>
1082.40314741005

> <r_psp_Prime_NBLong_SGB>
-1246.17248963018

> <r_psp_Prime_Self_SGB>
-34765.0837521393

> <s_m_Source_Path>
F:\Dekstop_files\DAC4,5\Molecular Systems Desgn and Engineering\supplementary_str

> <s_m_Source_File>
1000_str.mae

> <i_m_Source_File_Index>
478

> <i_lp_mmshare_version>
53156

> <s_epik_input>
W2NIXTFbY0hdW2NIXVtjSF1jKGMxMiljKFtDSDJdW05IXVtDSF0oW0NIM10pW0NIM10pYyhbbkhdMilDKD1PKVtOSF1bQ0hdM1tDSDJdW0NIMl1bQ0gyXVtDSDJdW0NIMl0z

> <s_epik_cmdline>
J2VwaWtfcHl0aG9uJywgJy1waHQnLCAnMC4wJywgJy1waCcsICc3LjAnLCAnLXRuJywgJzgnLCAnLW1hJywgJzUwMCcsICctaW1hZScsICc8aW5maWxlLm1hZT4nLCAnLW9tYWUnLCAnPG91dGZpbGUubWFlPic=

> <r_lp_tautomer_probability>
1

> <r_epik_Ionization_Penalty>
  0.0025

> <r_epik_Ionization_Penalty_Charging>
  0.0025

> <r_epik_Ionization_Penalty_Neutral>
  0.0000

> <r_epik_State_Penalty>
  0.0000

> <r_epik_Charging_Adjusted_Penalty>
0.00246385191762543

> <i_epik_Tot_Q>
1

> <i_epik_Tot_abs_Q>
1

> <s_lp_Force_Field>
S-OPLS

> <r_lp_Energy>
35.301197

> <b_lp_Chiralities_Consistent>
1

> <s_lp_Variant>
GR-20-1

> <s_i_glide_gridfile>
glide-grid_1_oct_mmpl3_after_loop_refinement

> <i_i_glide_lignum>
17

> <i_i_glide_rotatable_bonds>
6

> <r_i_docking_score>
-7.91296331479883

> <r_i_glide_ligand_efficiency>
-0.344041883252123

> <r_i_glide_ligand_efficiency_sa>
-0.978409350444062

> <r_i_glide_ligand_efficiency_ln>
-1.91342628030275

> <r_glide_XP_GScore>
-7.91296331479883

> <r_i_glide_gscore>
-7.91296331479883

> <r_i_glide_evdw>
-30.1624164581299

> <r_i_glide_ecoul>
-0.293003439903259

> <r_i_glide_energy>
-30.4554198980331

> <r_i_glide_einternal>
5.2776083946228

> <r_i_glide_emodel>
-46.9461296042429

> <r_glide_XP_HBond>
-0.0174832475361205

> <r_glide_XP_PhobEn>
-2.36458805675735

> <r_glide_XP_PhobEnHB>
0

> <r_glide_XP_LowMW>
-0.4518496

> <r_glide_XP_RotPenal>
0.402853769098065

> <r_glide_XP_LipophilicEvdW>
-5.15441391955721

> <r_glide_XP_PhobEnPairHB>
0

> <r_glide_XP_Electro>
-0.0219752579927444

> <r_glide_XP_Sitemap>
-0.305508044627076

> <r_glide_XP_Penalties>
1.04257360121286e-006

> <r_glide_XP_PiStack>
0

> <r_glide_XP_HBPenal>
0

> <r_glide_XP_ExposPenal>
0

> <r_glide_XP_PiCat>
0

> <r_glide_XP_ClBr>
0

> <r_glide_XP_Zpotr>
0

> <i_i_glide_confnum>
1

> <i_i_glide_posenum>
1

> <r_i_glide_eff_state_penalty>
0

> <i_glide_XP_PoseRank>
1

> <r_i_glide_rmsd_to_input>
108.205490828101

> <s_psp_Prime_MMGBSA_Input_Structure_Hash>
74b361d9cc1dee66fc30f974b5cc7d044873de11b10bc4fa6b2f901e

> <i_psp_number_heavy_atoms>
23

> <r_psp_MMGBSA_dG_Bind>
-40.4396709137582

> <r_psp_MMGBSA_dG_Bind_Coulomb>
75.7498715641559

> <r_psp_MMGBSA_dG_Bind_Covalent>
8.45668341226337

> <r_psp_MMGBSA_dG_Bind_Hbond>
-0.572284998672444

> <r_psp_MMGBSA_dG_Bind_Lipo>
-25.1254065915487

> <r_psp_MMGBSA_dG_Bind_Packing>
-1.98540399259104

> <r_psp_MMGBSA_dG_Bind_SelfCont>
7.105427357601e-015

> <r_psp_MMGBSA_dG_Bind_Solv_GB>
-74.0817347749389

> <r_psp_MMGBSA_dG_Bind_vdW>
-22.8813955324958

> <r_psp_Lig_Strain_Energy>
14.5855353823502

> <r_psp_Lig_Strain_Coulomb>
-0.891719000892731

> <r_psp_Lig_Strain_Covalent>
8.45688428037496

> <r_psp_Lig_Strain_Hbond>
0

> <r_psp_Lig_Strain_Lipo>
-0.384906110846926

> <r_psp_Lig_Strain_Packing>
0

> <r_psp_Lig_Strain_SelfCont>
0

> <r_psp_Lig_Strain_Solv_GB>
-0.0834686114398835

> <r_psp_Lig_Strain_vdW>
7.48874482515483

> <r_psp_Ligand_Energy>
15.589415504091

> <r_psp_Ligand_Coulomb>
4.26283665260083

> <r_psp_Ligand_Covalent>
22.2913408871388

> <r_psp_Ligand_Hbond>
0

> <r_psp_Ligand_Lipo>
-1.59906443605127

> <r_psp_Ligand_Packing>
0

> <r_psp_Ligand_SelfCont>
0

> <r_psp_Ligand_Solv_GB>
-19.9034397334963

> <r_psp_Ligand_vdW>
10.5377421338989

> <r_psp_Complex_Energy>
-34938.5970322005

> <r_psp_Complex_Coulomb>
-26380.6257202093

> <r_psp_Complex_Covalent>
4039.90336526863

> <r_psp_Complex_Hbond>
-550.669890081853

> <r_psp_Complex_Lipo>
-2140.20769918068

> <r_psp_Complex_Packing>
-57.8300464197999

> <r_psp_Complex_SelfCont>
-40.4078915603482

> <r_psp_Complex_Solv_GB>
-5303.80950574645

> <r_psp_Complex_vdW>
-4504.94964427065

> <r_psp_Receptor_Energy>
-34913.7467767908

> <r_psp_Receptor_Coulomb>
-26460.6384284261

> <r_psp_Receptor_Covalent>
4009.15534096923

> <r_psp_Receptor_Hbond>
-550.097605083181

> <r_psp_Receptor_Lipo>
-2113.48322815308

> <r_psp_Receptor_Packing>
-55.8446424272089

> <r_psp_Receptor_SelfCont>
-40.4078915603482

> <r_psp_Receptor_Solv_GB>
-5209.82433123801

> <r_psp_Receptor_vdW>
-4492.60599087205

> <r_psp_MMGBSA_dG_Bind(NS)>
-55.025206296159

> <r_psp_MMGBSA_dG_Bind(NS)_Coulomb>
76.6415905650611

> <r_psp_MMGBSA_dG_Bind(NS)_Covalent>
-0.00020086811582587

> <r_psp_MMGBSA_dG_Bind(NS)_Hbond>
-0.572284998672217

> <r_psp_MMGBSA_dG_Bind(NS)_Lipo>
-24.7405004806992

> <r_psp_MMGBSA_dG_Bind(NS)_Packing>
-1.98540399259109

> <r_psp_MMGBSA_dG_Bind(NS)_SelfCont>
0

> <r_psp_MMGBSA_dG_Bind(NS)_Solv_GB>
-73.9982661635013

> <r_psp_MMGBSA_dG_Bind(NS)_vdW>
-30.3701403576551

> <r_psp_Rec_Strain_Energy>
5.0931703299284e-011

> <r_psp_Rec_Strain_Coulomb>
-1.09139364212751e-011

> <r_psp_Rec_Strain_Covalent>
4.09272615797818e-012

> <r_psp_Rec_Strain_Hbond>
-2.27373675443232e-013

> <r_psp_Rec_Strain_Lipo>
-2.72848410531878e-012

> <r_psp_Rec_Strain_Packing>
4.9737991503207e-014

> <r_psp_Rec_Strain_SelfCont>
7.105427357601e-015

> <r_psp_Rec_Strain_Solv_GB>
2.72848410531878e-012

> <r_psp_Rec_Strain_vdW>
4.54747350886464e-012

> <r_psp_Prime_MMGBSA_ligand_efficiency>
-1.75824656146775

> <r_psp_Prime_MMGBSA_ligand_efficiency_sa>
-2.63736984220162

> <r_psp_Prime_MMGBSA_ligand_efficiency_ln>
-9.77867911360923

> <i_psp_ExecuteFunction_Internal_Entry_Index>
131

> <b_m_m_glide_XPvisualizer>
1

> <i_qp_#stars>
0

> <i_qp_#amine>
1

> <i_qp_#amidine>
0

> <i_qp_#acid>
0

> <i_qp_#amide>
0

> <i_qp_#rotor>
5

> <i_qp_#rtvFG>
0

> <i_qp_CNS>
1

> <r_qp_mol_MW>
   313.442

> <r_qp_dipole>
     6.447

> <r_qp_SASA>
   656.101

> <r_qp_FOSA>
   429.147

> <r_qp_FISA>
    51.592

> <r_qp_PISA>
   175.362

> <r_qp_WPSA>
     0.000

> <r_qp_volume>
  1137.405

> <r_qp_donorHB>
     3.000

> <r_qp_accptHB>
     4.000

> <r_qp_dip^2/V>
   0.0365427

> <r_qp_ACxDN^.5/SA>
   0.0105597

> <r_qp_glob>
   0.8031646

> <r_qp_QPpolrz>
    37.829

> <r_qp_QPlogPC16>
    11.060

> <r_qp_QPlogPoct>
    18.825

> <r_qp_QPlogPw>
    10.073

> <r_qp_QPlogPo/w>
     3.658

> <r_qp_QPlogS>
    -4.373

> <r_qp_CIQPlogS>
    -3.260

> <r_qp_QPlogHERG>
    -6.279

> <r_qp_QPPCaco>
   800.851

> <r_qp_QPlogBB>
     0.127

> <r_qp_QPPMDCK>
   430.507

> <r_qp_QPlogKp>
    -3.435

> <r_qp_IP(eV)>
     8.356

> <r_qp_EA(eV)>
     0.418

> <i_qp_#metab>
2

> <r_qp_QPlogKhsa>
     0.541

> <i_qp_HumanOralAbsorption>
3

> <r_qp_PercentHumanOralAbsorption>
   100.000

> <r_qp_SAfluorine>
     0.000

> <r_qp_SAamideO>
     0.000

> <r_qp_PSA>
    60.987

> <i_qp_#NandO>
4

> <i_qp_RuleOfFive>
0

> <i_qp_RuleOfThree>
0

> <i_qp_#ringatoms>
15

> <i_qp_#in34>
0

> <i_qp_#in56>
15

> <i_qp_#noncon>
6

> <i_qp_#nonHatm>
23

> <r_qp_Jm>
0.00487366614812874

> <s_m_subgroupid>
100str_copy1

> <s_m_subgroup_title>
100str

> <b_m_subgroup_collapsed>
0

$$$$
GR-21
                    3D
 Structure written by MMmdl.
 54 56  0  0  1  0            999 V2000
   -3.0006    1.8528   -0.3720 C   0  0  0  0  0  0
   -2.0135    0.8814   -0.1730 C   0  0  0  0  0  0
   -0.6734    1.2079    0.1772 C   0  0  0  0  0  0
   -0.3392    2.5645    0.3364 C   0  0  0  0  0  0
   -1.3188    3.5360    0.1404 C   0  0  0  0  0  0
   -2.6197    3.1843   -0.2077 C   0  0  0  0  0  0
    0.0668   -0.0252    0.2880 C   0  0  0  0  0  0
   -0.8443   -1.0612    0.0303 C   0  0  0  0  0  0
   -2.0692   -0.4888   -0.2465 N   0  0  0  0  0  0
    1.5410   -0.1105    0.6560 C   0  0  0  0  0  0
   -0.6211   -2.4964    0.0522 C   0  0  0  0  0  0
   -1.6687   -3.2512   -0.3402 N   0  0  0  0  0  0
   -1.6970   -4.7147   -0.3971 C   0  0  0  0  0  0
   -1.6498   -5.4265    0.9818 C   0  0  0  0  0  0
   -1.7297   -6.9631    0.8877 C   0  0  0  0  0  0
   -2.9131   -7.4364    0.0283 C   0  0  0  0  0  0
   -2.8744   -6.8011   -1.3709 C   0  0  0  0  0  0
   -2.8196   -5.2618   -1.3115 C   0  0  0  0  0  0
    0.4634   -2.9720    0.3912 O   0  0  0  0  0  0
    2.3915   -0.6963   -0.4931 N   0  3  0  0  0  0
    2.6133    0.0796   -1.8173 C   0  0  0  0  0  0
    3.7419   -0.6728   -2.5540 C   0  0  0  0  0  0
    3.0549    1.5272   -1.5073 C   0  0  0  0  0  0
    1.3236    0.0430   -2.6672 C   0  0  0  0  0  0
   -4.0150    1.5934   -0.6379 H   0  0  0  0  0  0
    0.6631    2.8604    0.6083 H   0  0  0  0  0  0
   -1.0656    4.5793    0.2615 H   0  0  0  0  0  0
   -3.3537    3.9640   -0.3510 H   0  0  0  0  0  0
   -2.8819   -1.0472   -0.4630 H   0  0  0  0  0  0
    2.0072    0.8385    0.9195 H   0  0  0  0  0  0
    1.7232   -0.8064    1.4753 H   0  0  0  0  0  0
   -2.5487   -2.7915   -0.5207 H   0  0  0  0  0  0
   -0.7754   -5.0134   -0.9034 H   0  0  0  0  0  0
   -0.7439   -5.1527    1.5239 H   0  0  0  0  0  0
   -2.4924   -5.0822    1.5837 H   0  0  0  0  0  0
   -0.8001   -7.3464    0.4639 H   0  0  0  0  0  0
   -1.8042   -7.3910    1.8882 H   0  0  0  0  0  0
   -2.8999   -8.5237   -0.0565 H   0  0  0  0  0  0
   -3.8514   -7.1800    0.5227 H   0  0  0  0  0  0
   -2.0032   -7.1727   -1.9128 H   0  0  0  0  0  0
   -3.7451   -7.1186   -1.9460 H   0  0  0  0  0  0
   -3.7823   -4.9082   -0.9380 H   0  0  0  0  0  0
   -2.7093   -4.8669   -2.3227 H   0  0  0  0  0  0
    3.9742   -0.1987   -3.5087 H   0  0  0  0  0  0
    3.4692   -1.7076   -2.7695 H   0  0  0  0  0  0
    4.6665   -0.6915   -1.9744 H   0  0  0  0  0  0
    3.9289    1.5568   -0.8548 H   0  0  0  0  0  0
    2.2637    2.1035   -1.0287 H   0  0  0  0  0  0
    3.3177    2.0595   -2.4223 H   0  0  0  0  0  0
    1.5078    0.4332   -3.6690 H   0  0  0  0  0  0
    0.5280    0.6553   -2.2470 H   0  0  0  0  0  0
    0.9387   -0.9716   -2.7831 H   0  0  0  0  0  0
    3.3103   -0.8525   -0.1041 H   0  0  0  0  0  0
    2.0186   -1.6077   -0.7200 H   0  0  0  0  0  0
  1  2  1  0  0  0
  1  6  2  0  0  0
  1 25  1  0  0  0
  2  3  2  0  0  0
  2  9  1  0  0  0
  3  4  1  0  0  0
  3  7  1  0  0  0
  4  5  2  0  0  0
  4 26  1  0  0  0
  5  6  1  0  0  0
  5 27  1  0  0  0
  6 28  1  0  0  0
  7  8  2  0  0  0
  7 10  1  0  0  0
  8  9  1  0  0  0
  8 11  1  0  0  0
  9 29  1  0  0  0
 10 20  1  0  0  0
 10 30  1  0  0  0
 10 31  1  0  0  0
 11 12  1  0  0  0
 11 19  2  0  0  0
 12 13  1  0  0  0
 12 32  1  0  0  0
 13 18  1  0  0  0
 13 14  1  0  0  0
 13 33  1  0  0  0
 14 15  1  0  0  0
 14 34  1  0  0  0
 14 35  1  0  0  0
 15 16  1  0  0  0
 15 36  1  0  0  0
 15 37  1  0  0  0
 16 17  1  0  0  0
 16 38  1  0  0  0
 16 39  1  0  0  0
 17 18  1  0  0  0
 17 40  1  0  0  0
 17 41  1  0  0  0
 18 42  1  0  0  0
 18 43  1  0  0  0
 20 21  1  0  0  0
 20 53  1  0  0  0
 20 54  1  0  0  0
 21 22  1  0  0  0
 21 23  1  0  0  0
 21 24  1  0  0  0
 22 44  1  0  0  0
 22 45  1  0  0  0
 22 46  1  0  0  0
 23 47  1  0  0  0
 23 48  1  0  0  0
 23 49  1  0  0  0
 24 50  1  0  0  0
 24 51  1  0  0  0
 24 52  1  0  0  0
M  CHG  1  20   1
M  END
> <s_m_entry_id>
8193

> <s_m_entry_name>
entry

> <i_f3d_flags>
0

> <s_m_job_name>
adme_1000

> <r_psp_Prime_Energy>
-34965.1920766675

> <r_psp_Prime_Solv_GB>
-5300.2703073434

> <r_psp_Prime_Coulomb>
-26388.1866339969

> <r_psp_Prime_vdW>
-4525.04268323973

> <r_psp_Prime_Covalent>
4035.97078085173

> <i_psp_model_num>
0

> <r_psp_Prime_Lipo>
-2141.30413182526

> <s_psp_Prime_Energy_Force_Field>
OPLS3e

> <s_psp_Prime_Energy_Solvent_Model>
VSGB2.1

> <r_psp_Prime_Hbond>
-550.106567126347

> <r_psp_Prime_Packing>
-55.8446424272089

> <r_psp_Prime_SelfCont>
-40.4078915603482

> <r_psp_Memb1_x>
103.457542316003

> <r_psp_Memb1_y>
39.4731108300965

> <r_psp_Memb1_z>
48.7987221124676

> <r_psp_Memb2_x>
99.8134167309003

> <r_psp_Memb2_y>
2.81176945184187

> <r_psp_Memb2_z>
23.8404289603493

> <r_psp_MembDummyRadius>
4.45

> <r_psp_Prime_Bond_Covalent>
467.329121215336

> <r_psp_Prime_Bond_SGB>
49984.3687281249

> <r_psp_Prime_Angle_Covalent>
2225.37934640858

> <r_psp_Prime_Angle_SGB>
-21649.2962977924

> <r_psp_Prime_Torsion_Covalent>
1343.26231322781

> <r_psp_Prime_NB14_LJ>
4079.11420699709

> <r_psp_Prime_NB14_Lipo>
0

> <r_psp_Prime_NB14_Elec>
25512.5052825113

> <r_psp_Prime_NB14_SGB>
-15597.6555887038

> <r_psp_Prime_NBShort_LJ>
-8196.73375754152

> <r_psp_Prime_NBShort_Lipo>
-2141.30413182526

> <r_psp_Prime_NBShort_Elec>
-52981.1826227193

> <r_psp_Prime_NBShort_SGB>
17967.1924785189

> <r_psp_Prime_NBLong_LJ>
-407.423132695307

> <r_psp_Prime_NBLong_Lipo>
0

> <r_psp_Prime_NBLong_Elec>
1080.49070621109

> <r_psp_Prime_NBLong_SGB>
-1237.93803603317

> <r_psp_Prime_Self_SGB>
-34766.9415914578

> <s_m_Source_Path>
F:\Dekstop_files\DAC4,5\Molecular Systems Desgn and Engineering\supplementary_str

> <s_m_Source_File>
1000_str.mae

> <i_m_Source_File_Index>
547

> <i_lp_mmshare_version>
53156

> <s_epik_input>
W2NIXTFbY0hdW2NIXVtjSF1jKGMxMiljKFtDSDJdW05IXUMoW0NIM10pKFtDSDNdKVtDSDNdKWMoW25IXTIpQyg9TylbTkhdW0NIXTNbQ0gyXVtDSDJdW0NIMl1bQ0gyXVtDSDJdMw==

> <s_epik_cmdline>
J2VwaWtfcHl0aG9uJywgJy1waHQnLCAnMC4wJywgJy1waCcsICc3LjAnLCAnLXRuJywgJzgnLCAnLW1hJywgJzUwMCcsICctaW1hZScsICc8aW5maWxlLm1hZT4nLCAnLW9tYWUnLCAnPG91dGZpbGUubWFlPic=

> <r_lp_tautomer_probability>
1

> <r_epik_Ionization_Penalty>
  0.0025

> <r_epik_Ionization_Penalty_Charging>
  0.0025

> <r_epik_Ionization_Penalty_Neutral>
  0.0000

> <r_epik_State_Penalty>
  0.0000

> <r_epik_Charging_Adjusted_Penalty>
0.00246385191762543

> <i_epik_Tot_Q>
1

> <i_epik_Tot_abs_Q>
1

> <s_lp_Force_Field>
S-OPLS

> <r_lp_Energy>
35.287982

> <b_lp_Chiralities_Consistent>
1

> <s_lp_Variant>
GR-21-1

> <s_i_glide_gridfile>
glide-grid_1_oct_mmpl3_after_loop_refinement

> <i_i_glide_lignum>
18

> <i_i_glide_rotatable_bonds>
6

> <r_i_docking_score>
-6.28335995054992

> <r_i_glide_ligand_efficiency>
-0.261806664606247

> <r_i_glide_ligand_efficiency_sa>
-0.755181098263948

> <r_i_glide_ligand_efficiency_ln>
-1.50389636076724

> <r_glide_XP_GScore>
-6.28335995054992

> <r_i_glide_gscore>
-6.28335995054992

> <r_i_glide_evdw>
-37.5812644958496

> <r_i_glide_ecoul>
-1.50015068054199

> <r_i_glide_energy>
-39.0814151763916

> <r_i_glide_einternal>
7.58271074295044

> <r_i_glide_emodel>
-51.8317229743548

> <r_glide_XP_HBond>
0

> <r_glide_XP_PhobEn>
-2.2260013706116

> <r_glide_XP_PhobEnHB>
0

> <r_glide_XP_LowMW>
-0.405094333333332

> <r_glide_XP_RotPenal>
0.373026100128801

> <r_glide_XP_LipophilicEvdW>
-6.63195721892219

> <r_glide_XP_PhobEnPairHB>
0

> <r_glide_XP_Electro>
-0.112511301040649

> <r_glide_XP_Sitemap>
-0.281619469846638

> <r_glide_XP_Penalties>
3.00079764307568

> <r_glide_XP_PiStack>
0

> <r_glide_XP_HBPenal>
0

> <r_glide_XP_ExposPenal>
0

> <r_glide_XP_PiCat>
0

> <r_glide_XP_ClBr>
0

> <r_glide_XP_Zpotr>
0

> <i_i_glide_confnum>
1

> <i_i_glide_posenum>
146

> <r_i_glide_eff_state_penalty>
0

> <i_glide_XP_PoseRank>
1

> <r_i_glide_rmsd_to_input>
109.717536478219

> <s_psp_Prime_MMGBSA_Input_Structure_Hash>
c8e6e69b83fa95a57cc0ae38409219eeecefc6a80acc6cfa9c6c20fe

> <i_psp_number_heavy_atoms>
24

> <r_psp_MMGBSA_dG_Bind>
-59.6579771066099

> <r_psp_MMGBSA_dG_Bind_Coulomb>
79.5092033623223

> <r_psp_MMGBSA_dG_Bind_Covalent>
3.24389940928677

> <r_psp_MMGBSA_dG_Bind_Hbond>
-0.00896204316654803

> <r_psp_MMGBSA_dG_Bind_Lipo>
-26.4553981697572

> <r_psp_MMGBSA_dG_Bind_Packing>
4.9737991503207e-014

> <r_psp_MMGBSA_dG_Bind_SelfCont>
7.105427357601e-015

> <r_psp_MMGBSA_dG_Bind_Solv_GB>
-72.2977036327929

> <r_psp_MMGBSA_dG_Bind_vdW>
-43.6490160325602

> <r_psp_Lig_Strain_Energy>
7.54607482531249

> <r_psp_Lig_Strain_Coulomb>
4.20905573438129

> <r_psp_Lig_Strain_Covalent>
3.24410027739876

> <r_psp_Lig_Strain_Hbond>
0

> <r_psp_Lig_Strain_Lipo>
-0.0440591146220322

> <r_psp_Lig_Strain_Packing>
0

> <r_psp_Lig_Strain_SelfCont>
0

> <r_psp_Lig_Strain_Solv_GB>
-2.62653949257925

> <r_psp_Lig_Strain_vdW>
2.7635174207337

> <r_psp_Ligand_Energy>
8.21267722990471

> <r_psp_Ligand_Coulomb>
-7.05740893316753

> <r_psp_Ligand_Covalent>
23.5715404732135

> <r_psp_Ligand_Hbond>
0

> <r_psp_Ligand_Lipo>
-1.36550550242237

> <r_psp_Ligand_Packing>
0

> <r_psp_Ligand_SelfCont>
0

> <r_psp_Ligand_Solv_GB>
-18.1482724725996

> <r_psp_Ligand_vdW>
11.2123236648807

> <r_psp_Complex_Energy>
-34965.1920766675

> <r_psp_Complex_Coulomb>
-26388.1866339969

> <r_psp_Complex_Covalent>
4035.97078085173

> <r_psp_Complex_Hbond>
-550.106567126347

> <r_psp_Complex_Lipo>
-2141.30413182526

> <r_psp_Complex_Packing>
-55.8446424272089

> <r_psp_Complex_SelfCont>
-40.4078915603482

> <r_psp_Complex_Solv_GB>
-5300.2703073434

> <r_psp_Complex_vdW>
-4525.04268323973

> <r_psp_Receptor_Energy>
-34913.7467767908

> <r_psp_Receptor_Coulomb>
-26460.6384284261

> <r_psp_Receptor_Covalent>
4009.15534096923

> <r_psp_Receptor_Hbond>
-550.097605083181

> <r_psp_Receptor_Lipo>
-2113.48322815308

> <r_psp_Receptor_Packing>
-55.8446424272089

> <r_psp_Receptor_SelfCont>
-40.4078915603482

> <r_psp_Receptor_Solv_GB>
-5209.82433123801

> <r_psp_Receptor_vdW>
-4492.60599087205

> <r_psp_MMGBSA_dG_Bind(NS)>
-67.204051931978

> <r_psp_MMGBSA_dG_Bind(NS)_Coulomb>
75.3001476279533

> <r_psp_MMGBSA_dG_Bind(NS)_Covalent>
-0.00020086811582587

> <r_psp_MMGBSA_dG_Bind(NS)_Hbond>
-0.00896204316632065

> <r_psp_MMGBSA_dG_Bind(NS)_Lipo>
-26.4113390551324

> <r_psp_MMGBSA_dG_Bind(NS)_Packing>
0

> <r_psp_MMGBSA_dG_Bind(NS)_SelfCont>
0

> <r_psp_MMGBSA_dG_Bind(NS)_Solv_GB>
-69.6711641402162

> <r_psp_MMGBSA_dG_Bind(NS)_vdW>
-46.4125334532991

> <r_psp_Rec_Strain_Energy>
5.0931703299284e-011

> <r_psp_Rec_Strain_Coulomb>
-1.09139364212751e-011

> <r_psp_Rec_Strain_Covalent>
4.09272615797818e-012

> <r_psp_Rec_Strain_Hbond>
-2.27373675443232e-013

> <r_psp_Rec_Strain_Lipo>
-2.72848410531878e-012

> <r_psp_Rec_Strain_Packing>
4.9737991503207e-014

> <r_psp_Rec_Strain_SelfCont>
7.105427357601e-015

> <r_psp_Rec_Strain_Solv_GB>
2.72848410531878e-012

> <r_psp_Rec_Strain_vdW>
4.54747350886464e-012

> <r_psp_Prime_MMGBSA_ligand_efficiency>
-2.48574904610875

> <r_psp_Prime_MMGBSA_ligand_efficiency_sa>
-3.72862356916312

> <r_psp_Prime_MMGBSA_ligand_efficiency_ln>
-14.2788914478016

> <i_psp_ExecuteFunction_Internal_Entry_Index>
178

> <b_m_m_glide_XPvisualizer>
1

> <i_qp_#stars>
0

> <i_qp_#amine>
1

> <i_qp_#amidine>
0

> <i_qp_#acid>
0

> <i_qp_#amide>
0

> <i_qp_#rotor>
5

> <i_qp_#rtvFG>
0

> <i_qp_CNS>
1

> <r_qp_mol_MW>
   327.469

> <r_qp_dipole>
     7.111

> <r_qp_SASA>
   628.846

> <r_qp_FOSA>
   425.017

> <r_qp_FISA>
    48.933

> <r_qp_PISA>
   154.896

> <r_qp_WPSA>
     0.000

> <r_qp_volume>
  1135.792

> <r_qp_donorHB>
     3.000

> <r_qp_accptHB>
     3.500

> <r_qp_dip^2/V>
   0.0445199

> <r_qp_ACxDN^.5/SA>
   0.0096402

> <r_qp_glob>
   0.8371824

> <r_qp_QPpolrz>
    37.569

> <r_qp_QPlogPC16>
    10.887

> <r_qp_QPlogPoct>
    18.659

> <r_qp_QPlogPw>
     9.357

> <r_qp_QPlogPo/w>
     3.844

> <r_qp_QPlogS>
    -4.027

> <r_qp_CIQPlogS>
    -3.702

> <r_qp_QPlogHERG>
    -5.631

> <r_qp_QPPCaco>
   848.734

> <r_qp_QPlogBB>
     0.195

> <r_qp_QPPMDCK>
   458.396

> <r_qp_QPlogKp>
    -3.458

> <r_qp_IP(eV)>
     8.449

> <r_qp_EA(eV)>
     0.538

> <i_qp_#metab>
2

> <r_qp_QPlogKhsa>
     0.630

> <i_qp_HumanOralAbsorption>
3

> <r_qp_PercentHumanOralAbsorption>
   100.000

> <r_qp_SAfluorine>
     0.000

> <r_qp_SAamideO>
     0.000

> <r_qp_PSA>
    59.173

> <i_qp_#NandO>
4

> <i_qp_RuleOfFive>
0

> <i_qp_RuleOfThree>
0

> <i_qp_#ringatoms>
15

> <i_qp_#in34>
0

> <i_qp_#in56>
15

> <i_qp_#noncon>
6

> <i_qp_#nonHatm>
24

> <r_qp_Jm>
0.0107246771173437

> <s_m_subgroupid>
100str_copy1

> <s_m_subgroup_title>
100str

> <b_m_subgroup_collapsed>
0

$$$$
ind_1,25270
                    3D
 Structure written by MMmdl.
 47 50  0  0  1  0            999 V2000
   -3.3067   -1.6946    0.1408 C   0  0  0  0  0  0
   -2.2457   -0.7845    0.0779 C   0  0  0  0  0  0
   -0.8825   -1.1943    0.0617 C   0  0  0  0  0  0
   -0.6002   -2.5711    0.1210 C   0  0  0  0  0  0
   -1.6538   -3.4810    0.1857 C   0  0  0  0  0  0
   -2.9767   -3.0487    0.1936 C   0  0  0  0  0  0
   -0.0728   -0.0026   -0.0156 C   0  0  0  0  0  0
   -0.9527    1.0890   -0.0241 C   0  0  0  0  0  0
   -2.2384    0.5887    0.0154 N   0  0  0  0  0  0
   -0.6670    2.5025   -0.1688 C   0  0  0  0  0  0
   -1.6291    3.3249    0.2975 N   0  0  0  0  0  0
    0.3841    2.9006   -0.6726 O   0  0  0  0  0  0
   -1.6028    4.7884    0.2522 C   0  0  0  0  0  0
   -1.7263    5.4017   -1.1688 C   0  0  0  0  0  0
   -1.7525    6.9427   -1.1780 C   0  0  0  0  0  0
   -2.7947    7.5149   -0.2036 C   0  0  0  0  0  0
   -2.5745    6.9823    1.2214 C   0  0  0  0  0  0
   -2.5659    5.4417    1.2734 C   0  0  0  0  0  0
   -4.3378   -1.3729    0.1490 H   0  0  0  0  0  0
    0.4192   -2.9274    0.1196 H   0  0  0  0  0  0
   -1.4407   -4.5390    0.2309 H   0  0  0  0  0  0
   -3.7683   -3.7820    0.2434 H   0  0  0  0  0  0
   -3.0454    1.1948   -0.0097 H   0  0  0  0  0  0
   -2.4794    2.9116    0.6502 H   0  0  0  0  0  0
   -0.6091    5.0838    0.5995 H   0  0  0  0  0  0
   -0.9102    5.0583   -1.8062 H   0  0  0  0  0  0
   -2.6525    5.0481   -1.6245 H   0  0  0  0  0  0
   -0.7642    7.3206   -0.9116 H   0  0  0  0  0  0
   -1.9516    7.3037   -2.1878 H   0  0  0  0  0  0
   -2.7457    8.6044   -0.2053 H   0  0  0  0  0  0
   -3.7982    7.2532   -0.5430 H   0  0  0  0  0  0
   -1.6268    7.3617    1.6068 H   0  0  0  0  0  0
   -3.3475    7.3705    1.8859 H   0  0  0  0  0  0
   -3.5814    5.0970    1.0702 H   0  0  0  0  0  0
   -2.3185    5.1180    2.2857 H   0  0  0  0  0  0
    4.4720   -1.4901   -1.4424 C   0  0  0  0  0  0
    3.4610   -0.6492   -0.7011 C   0  0  0  0  0  0
    3.5991    0.4084    0.1858 C   0  0  0  0  0  0
    2.3220    0.8180    0.5803 C   0  0  0  0  0  0
    1.3877    0.0165   -0.0633 C   0  0  0  0  0  0
    2.1108   -0.8613   -0.8346 N   0  0  0  0  0  0
    1.7012   -1.5716   -1.4238 H   0  0  0  0  0  0
    5.4941   -1.1780   -1.2263 H   0  0  0  0  0  0
    4.3380   -1.4240   -2.5223 H   0  0  0  0  0  0
    4.3944   -2.5433   -1.1715 H   0  0  0  0  0  0
    4.5322    0.8398    0.5167 H   0  0  0  0  0  0
    2.0996    1.6204    1.2683 H   0  0  0  0  0  0
  1  2  2  0  0  0
  1  6  1  0  0  0
  1 19  1  0  0  0
  2  3  1  0  0  0
  2  9  1  0  0  0
  3  4  2  0  0  0
  3  7  1  0  0  0
  4  5  1  0  0  0
  4 20  1  0  0  0
  5  6  2  0  0  0
  5 21  1  0  0  0
  6 22  1  0  0  0
  7  8  2  0  0  0
  7 40  1  0  0  0
  8  9  1  0  0  0
  8 10  1  0  0  0
  9 23  1  0  0  0
 10 11  1  0  0  0
 10 12  2  0  0  0
 11 13  1  0  0  0
 11 24  1  0  0  0
 13 18  1  0  0  0
 13 14  1  0  0  0
 13 25  1  0  0  0
 14 15  1  0  0  0
 14 26  1  0  0  0
 14 27  1  0  0  0
 15 16  1  0  0  0
 15 28  1  0  0  0
 15 29  1  0  0  0
 16 17  1  0  0  0
 16 30  1  0  0  0
 16 31  1  0  0  0
 17 18  1  0  0  0
 17 32  1  0  0  0
 17 33  1  0  0  0
 18 34  1  0  0  0
 18 35  1  0  0  0
 36 37  1  0  0  0
 36 43  1  0  0  0
 36 44  1  0  0  0
 36 45  1  0  0  0
 37 41  1  0  0  0
 37 38  2  0  0  0
 38 39  1  0  0  0
 38 46  1  0  0  0
 39 40  2  0  0  0
 39 47  1  0  0  0
 40 41  1  0  0  0
 41 42  1  0  0  0
M  END
> <s_m_entry_id>
8157

> <s_m_entry_name>
entry

> <i_f3d_flags>
0

> <s_m_job_name>
adme_1000

> <r_psp_Prime_Energy>
-34127.2042339651

> <r_psp_Prime_Solv_GB>
-5188.38774603249

> <r_psp_Prime_Coulomb>
-26475.130858295

> <r_psp_Prime_vdW>
-4062.88214196321

> <r_psp_Prime_Covalent>
4420.30148612294

> <i_psp_model_num>
0

> <r_psp_Prime_Lipo>
-2174.75275069602

> <s_psp_Prime_Energy_Force_Field>
S-OPLS

> <s_psp_Prime_Energy_Solvent_Model>
VSGB2.1

> <r_psp_Prime_Hbond>
-550.099689113805

> <r_psp_Prime_Packing>
-55.8446424272089

> <r_psp_Prime_SelfCont>
-40.4078915603482

> <r_psp_Memb1_x>
103.457542316003

> <r_psp_Memb1_y>
39.4731108300965

> <r_psp_Memb1_z>
48.7987221124676

> <r_psp_Memb2_x>
99.8134167309003

> <r_psp_Memb2_y>
2.81176945184187

> <r_psp_Memb2_z>
23.8404289603493

> <r_psp_MembDummyRadius>
4.45

> <r_psp_Prime_Bond_Covalent>
467.27948794751

> <r_psp_Prime_Bond_SGB>
49972.3407764808

> <r_psp_Prime_Angle_Covalent>
2224.24568491188

> <r_psp_Prime_Angle_SGB>
-21649.295786375

> <r_psp_Prime_Torsion_Covalent>
1728.77631326355

> <r_psp_Prime_NB14_LJ>
4236.30983179948

> <r_psp_Prime_NB14_Lipo>
0

> <r_psp_Prime_NB14_Elec>
25555.6970908554

> <r_psp_Prime_NB14_SGB>
-15626.2300655935

> <r_psp_Prime_NBShort_LJ>
-7884.26482432656

> <r_psp_Prime_NBShort_Lipo>
-2174.75275069602

> <r_psp_Prime_NBShort_Elec>
-53047.8031593524

> <r_psp_Prime_NBShort_SGB>
18023.6537045139

> <r_psp_Prime_NBLong_LJ>
-414.927149436123

> <r_psp_Prime_NBLong_Lipo>
0

> <r_psp_Prime_NBLong_Elec>
1016.97521020205

> <r_psp_Prime_NBLong_SGB>
-1163.42520693162

> <r_psp_Prime_Self_SGB>
-34745.4311681271

> <s_m_Source_Path>
F:\Dekstop_files\DAC4,5\Molecular Systems Desgn and Engineering\supplementary_str

> <s_m_Source_File>
1000_str.mae

> <i_m_Source_File_Index>
834

> <i_lp_mmshare_version>
53156

> <s_epik_input>
W2NIXTFbY0hdW2NIXVtjSF1jKGMxMiljKC1jKFtuSF0zKVtjSF1bY0hdYzNbQ0gzXSljKFtuSF0yKUMoPU8pW05IXVtDSF00W0NIMl1bQ0gyXVtDSDJdW0NIMl1bQ0gyXTQ=

> <s_epik_cmdline>
J2VwaWtfcHl0aG9uJywgJy1waHQnLCAnMC4wJywgJy1waCcsICc3LjAnLCAnLXRuJywgJzgnLCAnLW1hJywgJzUwMCcsICctaW1hZScsICc8aW5maWxlLm1hZT4nLCAnLW9tYWUnLCAnPG91dGZpbGUubWFlPic=

> <r_lp_tautomer_probability>
1

> <r_epik_Ionization_Penalty>
  0.0000

> <r_epik_Ionization_Penalty_Charging>
  0.0000

> <r_epik_Ionization_Penalty_Neutral>
  0.0000

> <r_epik_State_Penalty>
  0.0000

> <r_epik_Charging_Adjusted_Penalty>
0

> <i_epik_Tot_Q>
0

> <i_epik_Tot_abs_Q>
0

> <s_lp_Force_Field>
S-OPLS

> <r_lp_Energy>
33.544698

> <b_lp_Chiralities_Consistent>
1

> <s_lp_Variant>
ind_1,25270-1

> <s_i_glide_gridfile>
glide-grid_mmpl3

> <i_i_glide_lignum>
1546

> <i_i_glide_rotatable_bonds>
4

> <r_i_docking_score>
-7.91587851705719

> <r_i_glide_ligand_efficiency>
-0.32982827154405

> <r_i_glide_ligand_efficiency_sa>
-0.951389364811426

> <r_i_glide_ligand_efficiency_ln>
-1.89463296512816

> <r_i_glide_gscore>
-7.91587851705719

> <r_i_glide_evdw>
-40.0361404418945

> <r_i_glide_ecoul>
-1.57200992107391

> <r_i_glide_energy>
-41.6081503629684

> <r_i_glide_einternal>
4.34126567840576

> <r_i_glide_emodel>
-56.5041509636507

> <i_i_glide_confnum>
37

> <i_i_glide_posenum>
337

> <r_i_glide_eff_state_penalty>
0

> <i_rge_num_r_groups>
1

> <r_rge_occupation_R1>
1

> <s_rge_R1>
25270

> <s_rge_R1_s_m_title>
25270

> <s_rge_R1_s_m_entry_id>
17269

> <s_rge_R1_s_m_entry_name>
eMol_BB_r-groups.657

> <s_rge_R1_s_m_smiles>
[*]c1ccc(C)[nH]1

> <b_rge_R1_b_sd_chiral_flag>
0

> <i_rge_R1_i_sd_version>
0

> <s_rge_R1_s_m_Source_File>
eMol_BB_r-groups-dedup.mae

> <i_rge_R1_i_m_Source_File_Index>
529

> <s_rge_R1_s_m_Source_Path>
/Users/konze/projects/pathfinder/r-groups

> <s_rge_R1_s_sd_Source_Path>
/Users/konze/projects/pathfinder/reactant sets/eMolecules

> <s_rge_R1_s_sd_Source_File>
eMol BB r-groups.mae

> <i_rge_R1_i_sd_Source_File_Index>
657

> <r_rge_R1_r_sd_MW>
81.1158

> <i_rge_R1_i_sd_RB>
0

> <i_rge_R1_i_sd_HeavyAtomCount>
6

> <i_rge_R1_i_sd_HBA>
0

> <i_rge_R1_i_sd_HBD>
1

> <r_rge_R1_r_sd_PSA>
15.79

> <i_rge_R1_i_sd_ChiralCenterCount>
0

> <i_rge_R1_i_sd_ChiralCenterCountAllPossible>
0

> <i_rge_R1_i_sd_RingCount>
1

> <r_rge_R1_r_sd_AlogP>
0.5534

> <s_rge_R1_s_sd_subgroup_title>
eMol BB r-groups

> <s_rge_R1_s_sd_subgroupid>
eMol BB r-groups

> <i_rge_R1_i_sd_subgroup_collapsed>
0

> <s_rge_R1_s_sd_Unique_SMILES_Stereo>
Cc1ccc[nH]1

> <i_rge_R1_i_sd_canvasUID>
598

> <s_rge_R1_s_canvas_Unique_SMILES_Stereo>
Cc1ccc[nH]1

> <s_psp_Prime_MMGBSA_Input_Structure_Hash>
c470da51a148b0e371611c0737e66871f5b19e2d5d0961d9f7b12bb7

> <i_psp_number_heavy_atoms>
24

> <r_psp_MMGBSA_dG_Bind>
-44.8863968464066

> <r_psp_MMGBSA_dG_Bind_Coulomb>
-1.2082974893965

> <r_psp_MMGBSA_dG_Bind_Covalent>
4.44937006329383

> <r_psp_MMGBSA_dG_Bind_Hbond>
-0.00208403062424622

> <r_psp_MMGBSA_dG_Bind_Lipo>
-22.8598686639471

> <r_psp_MMGBSA_dG_Bind_Packing>
4.9737991503207e-014

> <r_psp_MMGBSA_dG_Bind_SelfCont>
7.105427357601e-015

> <r_psp_MMGBSA_dG_Bind_Solv_GB>
25.9977389693995

> <r_psp_MMGBSA_dG_Bind_vdW>
-51.2632556950448

> <r_psp_Lig_Strain_Energy>
7.15971466630515

> <r_psp_Lig_Strain_Coulomb>
5.57405196187005

> <r_psp_Lig_Strain_Covalent>
4.44957093140763

> <r_psp_Lig_Strain_Hbond>
0

> <r_psp_Lig_Strain_Lipo>
0.0761873468218712

> <r_psp_Lig_Strain_Packing>
0

> <r_psp_Lig_Strain_SelfCont>
0

> <r_psp_Lig_Strain_Solv_GB>
-1.57341703915701

> <r_psp_Lig_Strain_vdW>
-1.3666785346374

> <r_psp_Ligand_Energy>
12.9332036150696

> <r_psp_Ligand_Coulomb>
-15.006746862586

> <r_psp_Ligand_Covalent>
25.4455902382342

> <r_psp_Ligand_Hbond>
0

> <r_psp_Ligand_Lipo>
-1.36824969459778

> <r_psp_Ligand_Packing>
0

> <r_psp_Ligand_SelfCont>
0

> <r_psp_Ligand_Solv_GB>
-7.83370463930446

> <r_psp_Ligand_vdW>
11.6963145733236

> <r_psp_Complex_Energy>
-34127.2042339651

> <r_psp_Complex_Coulomb>
-26475.130858295

> <r_psp_Complex_Covalent>
4420.30148612294

> <r_psp_Complex_Hbond>
-550.099689113805

> <r_psp_Complex_Lipo>
-2174.75275069602

> <r_psp_Complex_Packing>
-55.8446424272089

> <r_psp_Complex_SelfCont>
-40.4078915603482

> <r_psp_Complex_Solv_GB>
-5188.38774603249

> <r_psp_Complex_vdW>
-4062.88214196321

> <r_psp_Receptor_Energy>
-34095.2510407338

> <r_psp_Receptor_Coulomb>
-26458.915813943

> <r_psp_Receptor_Covalent>
4390.40652582141

> <r_psp_Receptor_Hbond>
-550.097605083181

> <r_psp_Receptor_Lipo>
-2150.52463233748

> <r_psp_Receptor_Packing>
-55.8446424272089

> <r_psp_Receptor_SelfCont>
-40.4078915603482

> <r_psp_Receptor_Solv_GB>
-5206.55178036259

> <r_psp_Receptor_vdW>
-4023.31520084149

> <r_psp_MMGBSA_dG_Bind(NS)>
-52.0461115126673

> <r_psp_MMGBSA_dG_Bind(NS)_Coulomb>
-6.7823494513068

> <r_psp_MMGBSA_dG_Bind(NS)_Covalent>
-0.000200868113097386

> <r_psp_MMGBSA_dG_Bind(NS)_Hbond>
-0.00208403062401885

> <r_psp_MMGBSA_dG_Bind(NS)_Lipo>
-22.9360560107639

> <r_psp_MMGBSA_dG_Bind(NS)_Packing>
0

> <r_psp_MMGBSA_dG_Bind(NS)_SelfCont>
0

> <r_psp_MMGBSA_dG_Bind(NS)_Solv_GB>
27.5711560085583

> <r_psp_MMGBSA_dG_Bind(NS)_vdW>
-49.8965771604121

> <r_psp_Rec_Strain_Energy>
-5.0931703299284e-011

> <r_psp_Rec_Strain_Coulomb>
4.00177668780088e-011

> <r_psp_Rec_Strain_Covalent>
-9.09494701772928e-013

> <r_psp_Rec_Strain_Hbond>
-2.27373675443232e-013

> <r_psp_Rec_Strain_Lipo>
-5.00222085975111e-012

> <r_psp_Rec_Strain_Packing>
4.9737991503207e-014

> <r_psp_Rec_Strain_SelfCont>
7.105427357601e-015

> <r_psp_Rec_Strain_Solv_GB>
-1.81898940354586e-012

> <r_psp_Rec_Strain_vdW>
4.54747350886464e-012

> <r_psp_Prime_MMGBSA_ligand_efficiency>
-1.87026653526694

> <r_psp_Prime_MMGBSA_ligand_efficiency_sa>
-2.80539980290041

> <r_psp_Prime_MMGBSA_ligand_efficiency_ln>
-10.7433744678844

> <r_i_glide_lipo>
-4.15449609177771

> <r_i_glide_hbond>
0

> <r_i_glide_metal>
0

> <r_i_glide_rewards>
-2.24728847840689

> <r_i_glide_erotb>
0.723514563383224

> <r_i_glide_esite>
0

> <i_psp_ExecuteFunction_Internal_Entry_Index>
1946

> <i_qp_#stars>
0

> <i_qp_#amine>
0

> <i_qp_#amidine>
0

> <i_qp_#acid>
0

> <i_qp_#amide>
0

> <i_qp_#rotor>
2

> <i_qp_#rtvFG>
0

> <i_qp_CNS>
-1

> <r_qp_mol_MW>
   321.421

> <r_qp_dipole>
     6.736

> <r_qp_SASA>
   644.022

> <r_qp_FOSA>
   330.959

> <r_qp_FISA>
    56.331

> <r_qp_PISA>
   256.731

> <r_qp_WPSA>
     0.000

> <r_qp_volume>
  1107.491

> <r_qp_donorHB>
     3.000

> <r_qp_accptHB>
     2.500

> <r_qp_dip^2/V>
   0.0409739

> <r_qp_ACxDN^.5/SA>
   0.0067236

> <r_qp_glob>
   0.8038187

> <r_qp_QPpolrz>
    39.335

> <r_qp_QPlogPC16>
    11.373

> <r_qp_QPlogPoct>
    18.855

> <r_qp_QPlogPw>
     9.814

> <r_qp_QPlogPo/w>
     4.612

> <r_qp_QPlogS>
    -6.254

> <r_qp_CIQPlogS>
    -5.261

> <r_qp_QPlogHERG>
    -5.931

> <r_qp_QPPCaco>
  2895.401

> <r_qp_QPlogBB>
    -0.138

> <r_qp_QPPMDCK>
  1560.999

> <r_qp_QPlogKp>
    -1.461

> <r_qp_IP(eV)>
     7.930

> <r_qp_EA(eV)>
     0.518

> <i_qp_#metab>
2

> <r_qp_QPlogKhsa>
     0.816

> <i_qp_HumanOralAbsorption>
1

> <r_qp_PercentHumanOralAbsorption>
   100.000

> <r_qp_SAfluorine>
     0.000

> <r_qp_SAamideO>
     0.000

> <r_qp_PSA>
    59.080

> <i_qp_#NandO>
4

> <i_qp_RuleOfFive>
0

> <i_qp_RuleOfThree>
1

> <i_qp_#ringatoms>
20

> <i_qp_#in34>
0

> <i_qp_#in56>
20

> <i_qp_#noncon>
6

> <i_qp_#nonHatm>
24

> <r_qp_Jm>
0.00619002361541285

> <s_m_subgroupid>
100str_copy1

> <s_m_subgroup_title>
100str

> <b_m_subgroup_collapsed>
0

$$$$
ind_1,25272
                    3D
 Structure written by MMmdl.
 50 53  0  0  1  0            999 V2000
   -3.2963   -1.7800    0.3605 C   0  0  0  0  0  0
   -2.2344   -0.8720    0.2817 C   0  0  0  0  0  0
   -0.8756   -1.2943    0.2278 C   0  0  0  0  0  0
   -0.5922   -2.6702    0.2548 C   0  0  0  0  0  0
   -1.6491   -3.5753    0.3332 C   0  0  0  0  0  0
   -2.9698   -3.1365    0.3848 C   0  0  0  0  0  0
   -0.0872   -0.0980    0.1537 C   0  0  0  0  0  0
   -0.9367    1.0108    0.1634 C   0  0  0  0  0  0
   -2.2226    0.5074    0.2336 N   0  0  0  0  0  0
   -0.6215    2.4219    0.0499 C   0  0  0  0  0  0
   -1.6434    3.2595    0.3206 N   0  0  0  0  0  0
    0.5090    2.8042   -0.2554 O   0  0  0  0  0  0
   -1.5881    4.7220    0.2692 C   0  0  0  0  0  0
   -1.4228    5.3238   -1.1522 C   0  0  0  0  0  0
   -1.4206    6.8652   -1.1755 C   0  0  0  0  0  0
   -2.6218    7.4633   -0.4257 C   0  0  0  0  0  0
   -2.6958    6.9369    1.0165 C   0  0  0  0  0  0
   -2.7238    5.3969    1.0759 C   0  0  0  0  0  0
   -4.3256   -1.4553    0.3997 H   0  0  0  0  0  0
    0.4274   -3.0248    0.2149 H   0  0  0  0  0  0
   -1.4405   -4.6350    0.3540 H   0  0  0  0  0  0
   -3.7633   -3.8671    0.4445 H   0  0  0  0  0  0
   -3.0297    1.1136    0.2395 H   0  0  0  0  0  0
   -2.5542    2.8614    0.4944 H   0  0  0  0  0  0
   -0.6784    5.0074    0.8039 H   0  0  0  0  0  0
   -0.5047    4.9622   -1.6168 H   0  0  0  0  0  0
   -2.2480    4.9802   -1.7779 H   0  0  0  0  0  0
   -0.4963    7.2308   -0.7253 H   0  0  0  0  0  0
   -1.4141    7.2192   -2.2070 H   0  0  0  0  0  0
   -2.5521    8.5518   -0.4206 H   0  0  0  0  0  0
   -3.5442    7.2186   -0.9548 H   0  0  0  0  0  0
   -1.8360    7.3038    1.5792 H   0  0  0  0  0  0
   -3.5775    7.3424    1.5144 H   0  0  0  0  0  0
   -3.6843    5.0660    0.6773 H   0  0  0  0  0  0
   -2.6873    5.0772    2.1186 H   0  0  0  0  0  0
    4.5916   -0.5623   -1.6023 C   0  0  0  0  0  0
    3.3977   -0.2620   -0.7252 C   0  0  0  0  0  0
    2.0458   -0.4183   -1.0517 C   0  0  0  0  0  0
    1.3985   -0.8483   -2.3554 C   0  0  0  0  0  0
    1.2869   -0.0880    0.0576 N   0  0  0  0  0  0
    2.1365    0.2504    1.0786 C   0  0  0  0  0  0
    3.4314    0.1236    0.6210 C   0  0  0  0  0  0
    4.4014   -1.4090   -2.2622 H   0  0  0  0  0  0
    5.4712   -0.8313   -1.0167 H   0  0  0  0  0  0
    4.8519    0.2852   -2.2363 H   0  0  0  0  0  0
    2.1267   -0.9621   -3.1582 H   0  0  0  0  0  0
    0.6624   -0.1206   -2.6990 H   0  0  0  0  0  0
    0.8837   -1.8036   -2.2545 H   0  0  0  0  0  0
    1.7472    0.5379    2.0446 H   0  0  0  0  0  0
    4.3238    0.3024    1.2024 H   0  0  0  0  0  0
  1  2  2  0  0  0
  1  6  1  0  0  0
  1 19  1  0  0  0
  2  3  1  0  0  0
  2  9  1  0  0  0
  3  4  2  0  0  0
  3  7  1  0  0  0
  4  5  1  0  0  0
  4 20  1  0  0  0
  5  6  2  0  0  0
  5 21  1  0  0  0
  6 22  1  0  0  0
  7  8  2  0  0  0
  7 40  1  0  0  0
  8  9  1  0  0  0
  8 10  1  0  0  0
  9 23  1  0  0  0
 10 11  1  0  0  0
 10 12  2  0  0  0
 11 13  1  0  0  0
 11 24  1  0  0  0
 13 18  1  0  0  0
 13 14  1  0  0  0
 13 25  1  0  0  0
 14 15  1  0  0  0
 14 26  1  0  0  0
 14 27  1  0  0  0
 15 16  1  0  0  0
 15 28  1  0  0  0
 15 29  1  0  0  0
 16 17  1  0  0  0
 16 30  1  0  0  0
 16 31  1  0  0  0
 17 18  1  0  0  0
 17 32  1  0  0  0
 17 33  1  0  0  0
 18 34  1  0  0  0
 18 35  1  0  0  0
 36 37  1  0  0  0
 36 43  1  0  0  0
 36 44  1  0  0  0
 36 45  1  0  0  0
 37 42  1  0  0  0
 37 38  2  0  0  0
 38 39  1  0  0  0
 38 40  1  0  0  0
 39 46  1  0  0  0
 39 47  1  0  0  0
 39 48  1  0  0  0
 40 41  1  0  0  0
 41 42  2  0  0  0
 41 49  1  0  0  0
 42 50  1  0  0  0
M  END
> <s_m_entry_id>
8110

> <s_m_entry_name>
entry

> <i_f3d_flags>
0

> <s_m_job_name>
adme_1000

> <r_psp_Prime_Energy>
-34141.0282320906

> <r_psp_Prime_Solv_GB>
-5194.07562892878

> <r_psp_Prime_Coulomb>
-26484.1837671828

> <r_psp_Prime_vdW>
-4052.6323950528

> <r_psp_Prime_Covalent>
4413.97552578627

> <i_psp_model_num>
0

> <r_psp_Prime_Lipo>
-2177.75318991267

> <s_psp_Prime_Energy_Force_Field>
S-OPLS

> <s_psp_Prime_Energy_Solvent_Model>
VSGB2.1

> <r_psp_Prime_Hbond>
-550.106206204025

> <r_psp_Prime_Packing>
-55.8446790354243

> <r_psp_Prime_SelfCont>
-40.4078915603482

> <r_psp_Memb1_x>
103.457542316003

> <r_psp_Memb1_y>
39.4731108300965

> <r_psp_Memb1_z>
48.7987221124676

> <r_psp_Memb2_x>
99.8134167309003

> <r_psp_Memb2_y>
2.81176945184187

> <r_psp_Memb2_z>
23.8404289603493

> <r_psp_MembDummyRadius>
4.45

> <r_psp_Prime_Bond_Covalent>
467.369095721967

> <r_psp_Prime_Bond_SGB>
49974.703498108

> <r_psp_Prime_Angle_Covalent>
2227.34067250068

> <r_psp_Prime_Angle_SGB>
-21655.6041120348

> <r_psp_Prime_Torsion_Covalent>
1719.26575756362

> <r_psp_Prime_NB14_LJ>
4237.64219376204

> <r_psp_Prime_NB14_Lipo>
0

> <r_psp_Prime_NB14_Elec>
25590.8054409657

> <r_psp_Prime_NB14_SGB>
-15631.9902777963

> <r_psp_Prime_NBShort_LJ>
-7875.17751763353

> <r_psp_Prime_NBShort_Lipo>
-2177.75318991267

> <r_psp_Prime_NBShort_Elec>
-53092.3966586094

> <r_psp_Prime_NBShort_SGB>
18030.4909419277

> <r_psp_Prime_NBLong_LJ>
-415.097071181311

> <r_psp_Prime_NBLong_Lipo>
0

> <r_psp_Prime_NBLong_Elec>
1017.40745046079

> <r_psp_Prime_NBLong_SGB>
-1169.23249398989

> <r_psp_Prime_Self_SGB>
-34742.4431851434

> <s_m_Source_Path>
F:\Dekstop_files\DAC4,5\Molecular Systems Desgn and Engineering\supplementary_str

> <s_m_Source_File>
1000_str.mae

> <i_m_Source_File_Index>
976

> <i_lp_mmshare_version>
53156

> <s_epik_input>
W2NIXTFbY0hdW2NIXVtjSF1jKGMxMiljKC1uKFtjSF1bY0hdMyljKFtDSDNdKWMzW0NIM10pYyhbbkhdMilDKD1PKVtOSF1bQ0hdNFtDSDJdW0NIMl1bQ0gyXVtDSDJdW0NIMl00

> <s_epik_cmdline>
J2VwaWtfcHl0aG9uJywgJy1waHQnLCAnMC4wJywgJy1waCcsICc3LjAnLCAnLXRuJywgJzgnLCAnLW1hJywgJzUwMCcsICctaW1hZScsICc8aW5maWxlLm1hZT4nLCAnLW9tYWUnLCAnPG91dGZpbGUubWFlPic=

> <r_lp_tautomer_probability>
1

> <r_epik_Ionization_Penalty>
  0.0000

> <r_epik_Ionization_Penalty_Charging>
  0.0000

> <r_epik_Ionization_Penalty_Neutral>
  0.0000

> <r_epik_State_Penalty>
  0.0000

> <r_epik_Charging_Adjusted_Penalty>
0

> <i_epik_Tot_Q>
0

> <i_epik_Tot_abs_Q>
0

> <s_lp_Force_Field>
S-OPLS

> <r_lp_Energy>
28.639954

> <b_lp_Chiralities_Consistent>
1

> <s_lp_Variant>
ind_1,25272-1

> <s_i_glide_gridfile>
glide-grid_mmpl3

> <i_i_glide_lignum>
560

> <i_i_glide_rotatable_bonds>
4

> <r_i_docking_score>
-9.40160062118733

> <r_i_glide_ligand_efficiency>
-0.376064024847493

> <r_i_glide_ligand_efficiency_sa>
-1.09961787817795

> <r_i_glide_ligand_efficiency_ln>
-2.22846109045673

> <r_i_glide_gscore>
-9.40160062118733

> <r_i_glide_evdw>
-41.8092346191406

> <r_i_glide_ecoul>
-0.1321881711483

> <r_i_glide_energy>
-41.9414227902889

> <r_i_glide_einternal>
0.425954282283783

> <r_i_glide_emodel>
-60.4492451509797

> <i_i_glide_confnum>
40

> <i_i_glide_posenum>
316

> <r_i_glide_eff_state_penalty>
0

> <i_rge_num_r_groups>
1

> <r_rge_occupation_R1>
1

> <s_rge_R1>
25272

> <s_rge_R1_s_m_title>
25272

> <s_rge_R1_s_m_entry_id>
16383

> <s_rge_R1_s_m_entry_name>
eMol_BB_r-groups.230

> <s_rge_R1_s_m_smiles>
c1cn([*])c(C)c1C

> <b_rge_R1_b_sd_chiral_flag>
0

> <i_rge_R1_i_sd_version>
0

> <s_rge_R1_s_m_Source_File>
eMol_BB_r-groups-dedup.mae

> <i_rge_R1_i_m_Source_File_Index>
157

> <s_rge_R1_s_m_Source_Path>
/Users/konze/projects/pathfinder/r-groups

> <s_rge_R1_s_sd_Source_Path>
/Users/konze/projects/pathfinder/reactant sets/eMolecules

> <s_rge_R1_s_sd_Source_File>
eMol BB r-groups.mae

> <i_rge_R1_i_sd_Source_File_Index>
230

> <r_rge_R1_r_sd_MW>
95.1424

> <i_rge_R1_i_sd_RB>
0

> <i_rge_R1_i_sd_HeavyAtomCount>
7

> <i_rge_R1_i_sd_HBA>
0

> <i_rge_R1_i_sd_HBD>
1

> <r_rge_R1_r_sd_PSA>
15.79

> <i_rge_R1_i_sd_ChiralCenterCount>
0

> <i_rge_R1_i_sd_ChiralCenterCountAllPossible>
0

> <i_rge_R1_i_sd_RingCount>
1

> <r_rge_R1_r_sd_AlogP>
1.0396

> <s_rge_R1_s_sd_subgroup_title>
eMol BB r-groups

> <s_rge_R1_s_sd_subgroupid>
eMol BB r-groups

> <i_rge_R1_i_sd_subgroup_collapsed>
0

> <s_rge_R1_s_sd_Unique_SMILES_Stereo>
Cc1c(C)[nH]cc1

> <i_rge_R1_i_sd_canvasUID>
175

> <s_rge_R1_s_canvas_Unique_SMILES_Stereo>
Cc1c(C)[nH]cc1

> <s_psp_Prime_MMGBSA_Input_Structure_Hash>
6bb7714222de195ca48144834f16611687754fff12fcf6ea1b91dc2d

> <i_psp_number_heavy_atoms>
25

> <r_psp_MMGBSA_dG_Bind>
-42.9147357049296

> <r_psp_MMGBSA_dG_Bind_Coulomb>
-1.40920962535893

> <r_psp_MMGBSA_dG_Bind_Covalent>
2.84092818796762

> <r_psp_MMGBSA_dG_Bind_Hbond>
-0.00860112084387765

> <r_psp_MMGBSA_dG_Bind_Lipo>
-24.0442011860764

> <r_psp_MMGBSA_dG_Bind_Packing>
-3.66082154386049e-005

> <r_psp_MMGBSA_dG_Bind_SelfCont>
7.105427357601e-015

> <r_psp_MMGBSA_dG_Bind_Solv_GB>
17.1759160567044

> <r_psp_MMGBSA_dG_Bind_vdW>
-37.4695314090277

> <r_psp_Lig_Strain_Energy>
6.61034038073691

> <r_psp_Lig_Strain_Coulomb>
0.117232647161721

> <r_psp_Lig_Strain_Covalent>
2.84112905608032

> <r_psp_Lig_Strain_Hbond>
0

> <r_psp_Lig_Strain_Lipo>
0.701988336218341

> <r_psp_Lig_Strain_Packing>
0

> <r_psp_Lig_Strain_SelfCont>
0

> <r_psp_Lig_Strain_Solv_GB>
0.192774039633832

> <r_psp_Lig_Strain_vdW>
2.75721630164266

> <r_psp_Ligand_Energy>
-2.86245565189452

> <r_psp_Ligand_Coulomb>
-23.8587436144834

> <r_psp_Ligand_Covalent>
20.7280717768879

> <r_psp_Ligand_Hbond>
0

> <r_psp_Ligand_Lipo>
-3.18435638911781

> <r_psp_Ligand_Packing>
0

> <r_psp_Ligand_SelfCont>
0

> <r_psp_Ligand_Solv_GB>
-4.69976462289648

> <r_psp_Ligand_vdW>
8.15233719771536

> <r_psp_Complex_Energy>
-34141.0282320906

> <r_psp_Complex_Coulomb>
-26484.1837671828

> <r_psp_Complex_Covalent>
4413.97552578627

> <r_psp_Complex_Hbond>
-550.106206204025

> <r_psp_Complex_Lipo>
-2177.75318991267

> <r_psp_Complex_Packing>
-55.8446790354243

> <r_psp_Complex_SelfCont>
-40.4078915603482

> <r_psp_Complex_Solv_GB>
-5194.07562892878

> <r_psp_Complex_vdW>
-4052.6323950528

> <r_psp_Receptor_Energy>
-34095.2510407338

> <r_psp_Receptor_Coulomb>
-26458.915813943

> <r_psp_Receptor_Covalent>
4390.40652582141

> <r_psp_Receptor_Hbond>
-550.097605083181

> <r_psp_Receptor_Lipo>
-2150.52463233748

> <r_psp_Receptor_Packing>
-55.8446424272089

> <r_psp_Receptor_SelfCont>
-40.4078915603482

> <r_psp_Receptor_Solv_GB>
-5206.55178036259

> <r_psp_Receptor_vdW>
-4023.31520084149

> <r_psp_MMGBSA_dG_Bind(NS)>
-49.5250760856143

> <r_psp_MMGBSA_dG_Bind(NS)_Coulomb>
-1.52644227256314

> <r_psp_MMGBSA_dG_Bind(NS)_Covalent>
-0.000200868111278396

> <r_psp_MMGBSA_dG_Bind(NS)_Hbond>
-0.00860112084365028

> <r_psp_MMGBSA_dG_Bind(NS)_Lipo>
-24.74618952229

> <r_psp_MMGBSA_dG_Bind(NS)_Packing>
-3.66082154883429e-005

> <r_psp_MMGBSA_dG_Bind(NS)_SelfCont>
0

> <r_psp_MMGBSA_dG_Bind(NS)_Solv_GB>
16.9831420170722

> <r_psp_MMGBSA_dG_Bind(NS)_vdW>
-40.2267477106748

> <r_psp_Rec_Strain_Energy>
-5.0931703299284e-011

> <r_psp_Rec_Strain_Coulomb>
4.00177668780088e-011

> <r_psp_Rec_Strain_Covalent>
-9.09494701772928e-013

> <r_psp_Rec_Strain_Hbond>
-2.27373675443232e-013

> <r_psp_Rec_Strain_Lipo>
-5.00222085975111e-012

> <r_psp_Rec_Strain_Packing>
4.9737991503207e-014

> <r_psp_Rec_Strain_SelfCont>
7.105427357601e-015

> <r_psp_Rec_Strain_Solv_GB>
-1.81898940354586e-012

> <r_psp_Rec_Strain_vdW>
4.54747350886464e-012

> <r_psp_Prime_MMGBSA_ligand_efficiency>
-1.71658942819719

> <r_psp_Prime_MMGBSA_ligand_efficiency_sa>
-2.57488414229578

> <r_psp_Prime_MMGBSA_ligand_efficiency_ln>
-10.1720784129195

> <r_i_glide_lipo>
-5.47888564107501

> <r_i_glide_hbond>
0

> <r_i_glide_metal>
0

> <r_i_glide_rewards>
-2.48335425883911

> <r_i_glide_erotb>
0.670929235356062

> <r_i_glide_esite>
0

> <i_psp_ExecuteFunction_Internal_Entry_Index>
84

> <i_qp_#stars>
1

> <i_qp_#amine>
0

> <i_qp_#amidine>
0

> <i_qp_#acid>
0

> <i_qp_#amide>
0

> <i_qp_#rotor>
2

> <i_qp_#rtvFG>
0

> <i_qp_CNS>
0

> <r_qp_mol_MW>
   335.448

> <r_qp_dipole>
     9.163

> <r_qp_SASA>
   662.009

> <r_qp_FOSA>
   381.344

> <r_qp_FISA>
    44.810

> <r_qp_PISA>
   235.855

> <r_qp_WPSA>
     0.000

> <r_qp_volume>
  1158.678

> <r_qp_donorHB>
     2.000

> <r_qp_accptHB>
     2.500

> <r_qp_dip^2/V>
   0.0724620

> <r_qp_ACxDN^.5/SA>
   0.0053406

> <r_qp_glob>
   0.8058911

> <r_qp_QPpolrz>
    41.185

> <r_qp_QPlogPC16>
    11.416

> <r_qp_QPlogPoct>
    18.410

> <r_qp_QPlogPw>
     8.172

> <r_qp_QPlogPo/w>
     5.240

> <r_qp_QPlogS>
    -6.858

> <r_qp_CIQPlogS>
    -5.694

> <r_qp_QPlogHERG>
    -5.798

> <r_qp_QPPCaco>
  3723.603

> <r_qp_QPlogBB>
    -0.017

> <r_qp_QPPMDCK>
  2048.773

> <r_qp_QPlogKp>
    -1.322

> <r_qp_IP(eV)>
     8.131

> <r_qp_EA(eV)>
     0.844

> <i_qp_#metab>
2

> <r_qp_QPlogKhsa>
     1.090

> <i_qp_HumanOralAbsorption>
1

> <r_qp_PercentHumanOralAbsorption>
   100.000

> <r_qp_SAfluorine>
     0.000

> <r_qp_SAamideO>
     0.000

> <r_qp_PSA>
    49.878

> <i_qp_#NandO>
4

> <i_qp_RuleOfFive>
1

> <i_qp_RuleOfThree>
1

> <i_qp_#ringatoms>
20

> <i_qp_#in34>
0

> <i_qp_#in56>
20

> <i_qp_#noncon>
6

> <i_qp_#nonHatm>
25

> <r_qp_Jm>
0.0022121605613703

> <s_m_subgroupid>
100str_copy1

> <s_m_subgroup_title>
100str

> <b_m_subgroup_collapsed>
0

$$$$
ind_1,25272
                    3D
 Structure written by MMmdl.
 50 53  0  0  1  0            999 V2000
   -3.3143   -1.7247    0.1116 C   0  0  0  0  0  0
   -2.2587   -0.8093    0.0346 C   0  0  0  0  0  0
   -0.8927   -1.2120    0.0255 C   0  0  0  0  0  0
   -0.6025   -2.5863    0.1020 C   0  0  0  0  0  0
   -1.6511   -3.5010    0.1806 C   0  0  0  0  0  0
   -2.9764   -3.0759    0.1848 C   0  0  0  0  0  0
   -0.0905   -0.0162   -0.0630 C   0  0  0  0  0  0
   -0.9771    1.0689   -0.0904 C   0  0  0  0  0  0
   -2.2600    0.5632   -0.0485 N   0  0  0  0  0  0
   -0.6970    2.4805   -0.2529 C   0  0  0  0  0  0
   -1.6332    3.3050    0.2592 N   0  0  0  0  0  0
    0.3327    2.8744   -0.8022 O   0  0  0  0  0  0
   -1.5906    4.7687    0.2296 C   0  0  0  0  0  0
   -1.7739    5.4034   -1.1750 C   0  0  0  0  0  0
   -1.7677    6.9450   -1.1618 C   0  0  0  0  0  0
   -2.7454    7.5250   -0.1271 C   0  0  0  0  0  0
   -2.4694    6.9634    1.2768 C   0  0  0  0  0  0
   -2.4931    5.4224    1.3038 C   0  0  0  0  0  0
   -4.3472   -1.4088    0.1168 H   0  0  0  0  0  0
    0.4188   -2.9373    0.1037 H   0  0  0  0  0  0
   -1.4322   -4.5571    0.2402 H   0  0  0  0  0  0
   -3.7640   -3.8126    0.2475 H   0  0  0  0  0  0
   -3.0702    1.1645   -0.0844 H   0  0  0  0  0  0
   -2.4746    2.8965    0.6381 H   0  0  0  0  0  0
   -0.5771    5.0452    0.5326 H   0  0  0  0  0  0
   -0.9985    5.0525   -1.8571 H   0  0  0  0  0  0
   -2.7287    5.0743   -1.5879 H   0  0  0  0  0  0
   -0.7590    7.2988   -0.9422 H   0  0  0  0  0  0
   -2.0106    7.3247   -2.1549 H   0  0  0  0  0  0
   -2.6697    8.6130   -0.1133 H   0  0  0  0  0  0
   -3.7702    7.2930   -0.4206 H   0  0  0  0  0  0
   -1.4959    7.3149    1.6219 H   0  0  0  0  0  0
   -3.2005    7.3572    1.9839 H   0  0  0  0  0  0
   -3.5233    5.1011    1.1420 H   0  0  0  0  0  0
   -2.2067    5.0761    2.2982 H   0  0  0  0  0  0
    4.8790    1.1217    0.6386 C   0  0  0  0  0  0
    3.5958    0.4934    0.1459 C   0  0  0  0  0  0
    3.4586   -0.6305   -0.6693 C   0  0  0  0  0  0
    4.4772   -1.5156   -1.3502 C   0  0  0  0  0  0
    2.1170   -0.8766   -0.8174 N   0  0  0  0  0  0
    1.3701    0.0193   -0.1003 C   0  0  0  0  0  0
    2.2910    0.8529    0.5169 C   0  0  0  0  0  0
    1.7311   -1.6269   -1.3720 H   0  0  0  0  0  0
    5.6676    0.3804    0.7683 H   0  0  0  0  0  0
    4.7505    1.5958    1.6119 H   0  0  0  0  0  0
    5.2531    1.8749   -0.0547 H   0  0  0  0  0  0
    5.4989   -1.1855   -1.1629 H   0  0  0  0  0  0
    4.3399   -1.5278   -2.4317 H   0  0  0  0  0  0
    4.4066   -2.5477   -1.0058 H   0  0  0  0  0  0
    2.0393    1.6696    1.1775 H   0  0  0  0  0  0
  1  2  2  0  0  0
  1  6  1  0  0  0
  1 19  1  0  0  0
  2  3  1  0  0  0
  2  9  1  0  0  0
  3  4  2  0  0  0
  3  7  1  0  0  0
  4  5  1  0  0  0
  4 20  1  0  0  0
  5  6  2  0  0  0
  5 21  1  0  0  0
  6 22  1  0  0  0
  7  8  2  0  0  0
  7 41  1  0  0  0
  8  9  1  0  0  0
  8 10  1  0  0  0
  9 23  1  0  0  0
 10 11  1  0  0  0
 10 12  2  0  0  0
 11 13  1  0  0  0
 11 24  1  0  0  0
 13 18  1  0  0  0
 13 14  1  0  0  0
 13 25  1  0  0  0
 14 15  1  0  0  0
 14 26  1  0  0  0
 14 27  1  0  0  0
 15 16  1  0  0  0
 15 28  1  0  0  0
 15 29  1  0  0  0
 16 17  1  0  0  0
 16 30  1  0  0  0
 16 31  1  0  0  0
 17 18  1  0  0  0
 17 32  1  0  0  0
 17 33  1  0  0  0
 18 34  1  0  0  0
 18 35  1  0  0  0
 36 37  1  0  0  0
 36 44  1  0  0  0
 36 45  1  0  0  0
 36 46  1  0  0  0
 37 42  1  0  0  0
 37 38  2  0  0  0
 38 39  1  0  0  0
 38 40  1  0  0  0
 39 47  1  0  0  0
 39 48  1  0  0  0
 39 49  1  0  0  0
 40 41  1  0  0  0
 40 43  1  0  0  0
 41 42  2  0  0  0
 42 50  1  0  0  0
M  END
> <s_m_entry_id>
8084

> <s_m_entry_name>
entry

> <i_f3d_flags>
0

> <s_m_job_name>
adme_1000

> <r_psp_Prime_Energy>
-34125.7512530948

> <r_psp_Prime_Solv_GB>
-5187.76936352762

> <r_psp_Prime_Coulomb>
-26475.8306877094

> <r_psp_Prime_vdW>
-4058.72759879012

> <r_psp_Prime_Covalent>
4420.34665353706

> <i_psp_model_num>
0

> <r_psp_Prime_Lipo>
-2177.4181119906

> <s_psp_Prime_Energy_Force_Field>
S-OPLS

> <s_psp_Prime_Energy_Solvent_Model>
VSGB2.1

> <r_psp_Prime_Hbond>
-550.099610626517

> <r_psp_Prime_Packing>
-55.8446424272089

> <r_psp_Prime_SelfCont>
-40.4078915603482

> <r_psp_Memb1_x>
103.457542316003

> <r_psp_Memb1_y>
39.4731108300965

> <r_psp_Memb1_z>
48.7987221124676

> <r_psp_Memb2_x>
99.8134167309003

> <r_psp_Memb2_y>
2.81176945184187

> <r_psp_Memb2_z>
23.8404289603493

> <r_psp_MembDummyRadius>
4.45

> <r_psp_Prime_Bond_Covalent>
468.115183399376

> <r_psp_Prime_Bond_SGB>
49963.2455866379

> <r_psp_Prime_Angle_Covalent>
2226.67615609618

> <r_psp_Prime_Angle_SGB>
-21649.6287362124

> <r_psp_Prime_Torsion_Covalent>
1725.5553140415

> <r_psp_Prime_NB14_LJ>
4238.12143243756

> <r_psp_Prime_NB14_Lipo>
0

> <r_psp_Prime_NB14_Elec>
25557.7682339936

> <r_psp_Prime_NB14_SGB>
-15620.8382532515

> <r_psp_Prime_NBShort_LJ>
-7881.80360428277

> <r_psp_Prime_NBShort_Lipo>
-2177.4181119906

> <r_psp_Prime_NBShort_Elec>
-53049.5360331404

> <r_psp_Prime_NBShort_SGB>
18018.7881744548

> <r_psp_Prime_NBLong_LJ>
-415.045426944903

> <r_psp_Prime_NBLong_Lipo>
0

> <r_psp_Prime_NBLong_Elec>
1015.93711143738

> <r_psp_Prime_NBLong_SGB>
-1162.12547539929

> <r_psp_Prime_Self_SGB>
-34737.2106597571

> <s_m_Source_Path>
F:\Dekstop_files\DAC4,5\Molecular Systems Desgn and Engineering\supplementary_str

> <s_m_Source_File>
1000_str.mae

> <i_m_Source_File_Index>
928

> <i_lp_mmshare_version>
53156

> <s_epik_input>
W2NIXTFbY0hdW2NIXVtjSF1jKGMxMiljKC1jKFtjSF0zKVtuSF1jKFtDSDNdKWMzW0NIM10pYyhbbkhdMilDKD1PKVtOSF1bQ0hdNFtDSDJdW0NIMl1bQ0gyXVtDSDJdW0NIMl00

> <s_epik_cmdline>
J2VwaWtfcHl0aG9uJywgJy1waHQnLCAnMC4wJywgJy1waCcsICc3LjAnLCAnLXRuJywgJzgnLCAnLW1hJywgJzUwMCcsICctaW1hZScsICc8aW5maWxlLm1hZT4nLCAnLW9tYWUnLCAnPG91dGZpbGUubWFlPic=

> <r_lp_tautomer_probability>
1

> <r_epik_Ionization_Penalty>
  0.0000

> <r_epik_Ionization_Penalty_Charging>
  0.0000

> <r_epik_Ionization_Penalty_Neutral>
  0.0000

> <r_epik_State_Penalty>
  0.0000

> <r_epik_Charging_Adjusted_Penalty>
0

> <i_epik_Tot_Q>
0

> <i_epik_Tot_abs_Q>
0

> <s_lp_Force_Field>
S-OPLS

> <r_lp_Energy>
30.47783

> <b_lp_Chiralities_Consistent>
1

> <s_lp_Variant>
ind_1,25272-1

> <s_i_glide_gridfile>
glide-grid_mmpl3

> <i_i_glide_lignum>
561

> <i_i_glide_rotatable_bonds>
4

> <r_i_docking_score>
-8.83678939923709

> <r_i_glide_ligand_efficiency>
-0.353471575969484

> <r_i_glide_ligand_efficiency_sa>
-1.03355715697986

> <r_i_glide_ligand_efficiency_ln>
-2.09458390482805

> <r_i_glide_gscore>
-8.83678939923709

> <r_i_glide_evdw>
-38.4603042602539

> <r_i_glide_ecoul>
-0.968554139137268

> <r_i_glide_energy>
-39.4288583993912

> <r_i_glide_einternal>
0.979997396469116

> <r_i_glide_emodel>
-56.4741373660041

> <i_i_glide_confnum>
5

> <i_i_glide_posenum>
330

> <r_i_glide_eff_state_penalty>
0

> <i_rge_num_r_groups>
1

> <r_rge_occupation_R1>
1

> <s_rge_R1>
25272

> <s_rge_R1_s_m_title>
25272

> <s_rge_R1_s_m_entry_id>
16384

> <s_rge_R1_s_m_entry_name>
eMol_BB_r-groups.230

> <s_rge_R1_s_m_smiles>
[*]c(c1)[nH]c(C)c1C

> <b_rge_R1_b_sd_chiral_flag>
0

> <i_rge_R1_i_sd_version>
0

> <s_rge_R1_s_m_Source_File>
eMol_BB_r-groups-dedup.mae

> <i_rge_R1_i_m_Source_File_Index>
157

> <s_rge_R1_s_m_Source_Path>
/Users/konze/projects/pathfinder/r-groups

> <s_rge_R1_s_sd_Source_Path>
/Users/konze/projects/pathfinder/reactant sets/eMolecules

> <s_rge_R1_s_sd_Source_File>
eMol BB r-groups.mae

> <i_rge_R1_i_sd_Source_File_Index>
230

> <r_rge_R1_r_sd_MW>
95.1424

> <i_rge_R1_i_sd_RB>
0

> <i_rge_R1_i_sd_HeavyAtomCount>
7

> <i_rge_R1_i_sd_HBA>
0

> <i_rge_R1_i_sd_HBD>
1

> <r_rge_R1_r_sd_PSA>
15.79

> <i_rge_R1_i_sd_ChiralCenterCount>
0

> <i_rge_R1_i_sd_ChiralCenterCountAllPossible>
0

> <i_rge_R1_i_sd_RingCount>
1

> <r_rge_R1_r_sd_AlogP>
1.0396

> <s_rge_R1_s_sd_subgroup_title>
eMol BB r-groups

> <s_rge_R1_s_sd_subgroupid>
eMol BB r-groups

> <i_rge_R1_i_sd_subgroup_collapsed>
0

> <s_rge_R1_s_sd_Unique_SMILES_Stereo>
Cc1c(C)[nH]cc1

> <i_rge_R1_i_sd_canvasUID>
175

> <s_rge_R1_s_canvas_Unique_SMILES_Stereo>
Cc1c(C)[nH]cc1

> <s_psp_Prime_MMGBSA_Input_Structure_Hash>
0576c080738f998537ebdc97d74b6a01862b7f0337a1f01fb72a3ba1

> <i_psp_number_heavy_atoms>
25

> <r_psp_MMGBSA_dG_Bind>
-40.5629404241918

> <r_psp_MMGBSA_dG_Bind_Coulomb>
-4.72180130058769

> <r_psp_MMGBSA_dG_Bind_Covalent>
6.03033400512504

> <r_psp_MMGBSA_dG_Bind_Hbond>
-0.0020055433357129

> <r_psp_MMGBSA_dG_Bind_Lipo>
-25.5405959056975

> <r_psp_MMGBSA_dG_Bind_Packing>
4.9737991503207e-014

> <r_psp_MMGBSA_dG_Bind_SelfCont>
7.105427357601e-015

> <r_psp_MMGBSA_dG_Bind_Solv_GB>
28.8979260605147

> <r_psp_MMGBSA_dG_Bind_vdW>
-45.2267977401111

> <r_psp_Lig_Strain_Energy>
10.1022988307664

> <r_psp_Lig_Strain_Coulomb>
0.529693390757433

> <r_psp_Lig_Strain_Covalent>
6.03053487323704

> <r_psp_Lig_Strain_Hbond>
0

> <r_psp_Lig_Strain_Lipo>
0.0886073212780902

> <r_psp_Lig_Strain_Packing>
0

> <r_psp_Lig_Strain_SelfCont>
0

> <r_psp_Lig_Strain_Solv_GB>
-0.575058730900111

> <r_psp_Lig_Strain_vdW>
4.0285219763939

> <r_psp_Ligand_Energy>
10.0627280632002

> <r_psp_Ligand_Coulomb>
-12.1930724658318

> <r_psp_Ligand_Covalent>
23.9097937105215

> <r_psp_Ligand_Hbond>
0

> <r_psp_Ligand_Lipo>
-1.35288374742317

> <r_psp_Ligand_Packing>
0

> <r_psp_Ligand_SelfCont>
0

> <r_psp_Ligand_Solv_GB>
-10.1155092255474

> <r_psp_Ligand_vdW>
9.81439979148102

> <r_psp_Complex_Energy>
-34125.7512530948

> <r_psp_Complex_Coulomb>
-26475.8306877094

> <r_psp_Complex_Covalent>
4420.34665353706

> <r_psp_Complex_Hbond>
-550.099610626517

> <r_psp_Complex_Lipo>
-2177.4181119906

> <r_psp_Complex_Packing>
-55.8446424272089

> <r_psp_Complex_SelfCont>
-40.4078915603482

> <r_psp_Complex_Solv_GB>
-5187.76936352762

> <r_psp_Complex_vdW>
-4058.72759879012

> <r_psp_Receptor_Energy>
-34095.2510407338

> <r_psp_Receptor_Coulomb>
-26458.915813943

> <r_psp_Receptor_Covalent>
4390.40652582141

> <r_psp_Receptor_Hbond>
-550.097605083181

> <r_psp_Receptor_Lipo>
-2150.52463233748

> <r_psp_Receptor_Packing>
-55.8446424272089

> <r_psp_Receptor_SelfCont>
-40.4078915603482

> <r_psp_Receptor_Solv_GB>
-5206.55178036259

> <r_psp_Receptor_vdW>
-4023.31520084149

> <r_psp_MMGBSA_dG_Bind(NS)>
-50.6652392549004

> <r_psp_MMGBSA_dG_Bind(NS)_Coulomb>
-5.25149469138341

> <r_psp_MMGBSA_dG_Bind(NS)_Covalent>
-0.000200868111278396

> <r_psp_MMGBSA_dG_Bind(NS)_Hbond>
-0.00200554333548553

> <r_psp_MMGBSA_dG_Bind(NS)_Lipo>
-25.6292032269707

> <r_psp_MMGBSA_dG_Bind(NS)_Packing>
0

> <r_psp_MMGBSA_dG_Bind(NS)_SelfCont>
0

> <r_psp_MMGBSA_dG_Bind(NS)_Solv_GB>
29.4729847914168

> <r_psp_MMGBSA_dG_Bind(NS)_vdW>
-49.2553197165098

> <r_psp_Rec_Strain_Energy>
-5.0931703299284e-011

> <r_psp_Rec_Strain_Coulomb>
4.00177668780088e-011

> <r_psp_Rec_Strain_Covalent>
-9.09494701772928e-013

> <r_psp_Rec_Strain_Hbond>
-2.27373675443232e-013

> <r_psp_Rec_Strain_Lipo>
-5.00222085975111e-012

> <r_psp_Rec_Strain_Packing>
4.9737991503207e-014

> <r_psp_Rec_Strain_SelfCont>
7.105427357601e-015

> <r_psp_Rec_Strain_Solv_GB>
-1.81898940354586e-012

> <r_psp_Rec_Strain_vdW>
4.54747350886464e-012

> <r_psp_Prime_MMGBSA_ligand_efficiency>
-1.62251761696767

> <r_psp_Prime_MMGBSA_ligand_efficiency_sa>
-2.43377642545151

> <r_psp_Prime_MMGBSA_ligand_efficiency_ln>
-9.61463245376722

> <r_i_glide_lipo>
-5.50988170394407

> <r_i_glide_hbond>
0

> <r_i_glide_metal>
0

> <r_i_glide_rewards>
-1.9295385967658

> <r_i_glide_erotb>
0.670929235356062

> <r_i_glide_esite>
0

> <i_psp_ExecuteFunction_Internal_Entry_Index>
511

> <i_qp_#stars>
2

> <i_qp_#amine>
0

> <i_qp_#amidine>
0

> <i_qp_#acid>
0

> <i_qp_#amide>
0

> <i_qp_#rotor>
2

> <i_qp_#rtvFG>
0

> <i_qp_CNS>
-1

> <r_qp_mol_MW>
   335.448

> <r_qp_dipole>
     6.465

> <r_qp_SASA>
   672.705

> <r_qp_FOSA>
   405.713

> <r_qp_FISA>
    56.237

> <r_qp_PISA>
   210.756

> <r_qp_WPSA>
     0.000

> <r_qp_volume>
  1164.148

> <r_qp_donorHB>
     3.000

> <r_qp_accptHB>
     2.500

> <r_qp_dip^2/V>
   0.0359079

> <r_qp_ACxDN^.5/SA>
   0.0064369

> <r_qp_glob>
   0.7955716

> <r_qp_QPpolrz>
    41.164

> <r_qp_QPlogPC16>
    11.611

> <r_qp_QPlogPoct>
    19.330

> <r_qp_QPlogPw>
     9.570

> <r_qp_QPlogPo/w>
     4.916

> <r_qp_QPlogS>
    -6.746

> <r_qp_CIQPlogS>
    -5.546

> <r_qp_QPlogHERG>
    -5.845

> <r_qp_QPPCaco>
  2901.390

> <r_qp_QPlogBB>
    -0.149

> <r_qp_QPPMDCK>
  1564.489

> <r_qp_QPlogKp>
    -1.621

> <r_qp_IP(eV)>
     7.878

> <r_qp_EA(eV)>
     0.507

> <i_qp_#metab>
3

> <r_qp_QPlogKhsa>
     0.968

> <i_qp_HumanOralAbsorption>
1

> <r_qp_PercentHumanOralAbsorption>
   100.000

> <r_qp_SAfluorine>
     0.000

> <r_qp_SAamideO>
     0.000

> <r_qp_PSA>
    58.939

> <i_qp_#NandO>
4

> <i_qp_RuleOfFive>
0

> <i_qp_RuleOfThree>
1

> <i_qp_#ringatoms>
20

> <i_qp_#in34>
0

> <i_qp_#in56>
20

> <i_qp_#noncon>
6

> <i_qp_#nonHatm>
25

> <r_qp_Jm>
0.00136501511919956

> <s_m_subgroupid>
100str_copy1

> <s_m_subgroup_title>
100str

> <b_m_subgroup_collapsed>
0

$$$$
ind_1,477183
                    3D
 Structure written by MMmdl.
 47 50  0  0  1  0            999 V2000
   -3.5077   -1.6696   -0.6068 C   0  0  0  0  0  0
   -2.4345   -0.7795   -0.4882 C   0  0  0  0  0  0
   -1.0967   -1.2134   -0.2593 C   0  0  0  0  0  0
   -0.8626   -2.5949   -0.1204 C   0  0  0  0  0  0
   -1.9293   -3.4841   -0.2344 C   0  0  0  0  0  0
   -3.2215   -3.0281   -0.4762 C   0  0  0  0  0  0
   -0.2677   -0.0288   -0.2168 C   0  0  0  0  0  0
   -1.1160    1.0749   -0.3536 C   0  0  0  0  0  0
   -2.3954    0.5940   -0.5466 N   0  0  0  0  0  0
   -0.7762    2.4863   -0.3733 C   0  0  0  0  0  0
   -1.8279    3.3315   -0.3621 N   0  0  0  0  0  0
    0.3966    2.8632   -0.4062 O   0  0  0  0  0  0
   -1.7509    4.7940   -0.3635 C   0  0  0  0  0  0
   -3.0626    5.4669   -0.8369 C   0  0  0  0  0  0
   -3.0089    7.0075   -0.8239 C   0  0  0  0  0  0
   -2.5324    7.5618    0.5283 C   0  0  0  0  0  0
   -1.1735    6.9638    0.9267 C   0  0  0  0  0  0
   -1.1930    5.4226    0.9418 C   0  0  0  0  0  0
   -4.5172   -1.3292   -0.7848 H   0  0  0  0  0  0
    0.1310   -2.9713    0.0728 H   0  0  0  0  0  0
   -1.7512   -4.5446   -0.1323 H   0  0  0  0  0  0
   -4.0244   -3.7460   -0.5586 H   0  0  0  0  0  0
   -3.1790    1.2121   -0.6983 H   0  0  0  0  0  0
   -2.7507    2.9416   -0.2394 H   0  0  0  0  0  0
   -1.0252    5.0567   -1.1379 H   0  0  0  0  0  0
   -3.3210    5.1248   -1.8403 H   0  0  0  0  0  0
   -3.8758    5.1569   -0.1781 H   0  0  0  0  0  0
   -2.3373    7.3517   -1.6122 H   0  0  0  0  0  0
   -3.9916    7.4143   -1.0658 H   0  0  0  0  0  0
   -2.4601    8.6490    0.4796 H   0  0  0  0  0  0
   -3.2724    7.3388    1.2986 H   0  0  0  0  0  0
   -0.4095    7.3067    0.2269 H   0  0  0  0  0  0
   -0.8756    7.3394    1.9064 H   0  0  0  0  0  0
   -1.8144    5.1025    1.7797 H   0  0  0  0  0  0
   -0.1843    5.0586    1.1408 H   0  0  0  0  0  0
    1.1003   -0.0379   -0.0309 N   0  0  0  0  0  0
    2.0586   -0.8526   -0.6546 C   0  0  0  0  0  0
    1.7735   -1.6368   -1.7836 C   0  0  0  0  0  0
    2.7969   -2.3923   -2.3590 C   0  0  0  0  0  0
    4.0789   -2.3431   -1.8109 C   0  0  0  0  0  0
    4.2944   -1.5266   -0.7007 C   0  0  0  0  0  0
    3.3102   -0.7857   -0.1301 N   0  0  0  0  0  0
    1.5268    0.6812    0.5361 H   0  0  0  0  0  0
    0.7868   -1.6586   -2.2216 H   0  0  0  0  0  0
    2.5987   -3.0054   -3.2258 H   0  0  0  0  0  0
    4.8861   -2.9181   -2.2401 H   0  0  0  0  0  0
    5.2737   -1.4547   -0.2511 H   0  0  0  0  0  0
  1  2  2  0  0  0
  1  6  1  0  0  0
  1 19  1  0  0  0
  2  3  1  0  0  0
  2  9  1  0  0  0
  3  4  2  0  0  0
  3  7  1  0  0  0
  4  5  1  0  0  0
  4 20  1  0  0  0
  5  6  2  0  0  0
  5 21  1  0  0  0
  6 22  1  0  0  0
  7  8  2  0  0  0
  7 36  1  0  0  0
  8  9  1  0  0  0
  8 10  1  0  0  0
  9 23  1  0  0  0
 10 11  1  0  0  0
 10 12  2  0  0  0
 11 13  1  0  0  0
 11 24  1  0  0  0
 13 18  1  0  0  0
 13 14  1  0  0  0
 13 25  1  0  0  0
 14 15  1  0  0  0
 14 26  1  0  0  0
 14 27  1  0  0  0
 15 16  1  0  0  0
 15 28  1  0  0  0
 15 29  1  0  0  0
 16 17  1  0  0  0
 16 30  1  0  0  0
 16 31  1  0  0  0
 17 18  1  0  0  0
 17 32  1  0  0  0
 17 33  1  0  0  0
 18 34  1  0  0  0
 18 35  1  0  0  0
 36 37  1  0  0  0
 36 43  1  0  0  0
 37 42  1  0  0  0
 37 38  2  0  0  0
 38 39  1  0  0  0
 38 44  1  0  0  0
 39 40  2  0  0  0
 39 45  1  0  0  0
 40 41  1  0  0  0
 40 46  1  0  0  0
 41 42  2  0  0  0
 41 47  1  0  0  0
M  END
> <s_m_entry_id>
8174

> <s_m_entry_name>
entry

> <i_f3d_flags>
0

> <s_m_job_name>
adme_1000

> <r_psp_Prime_Energy>
-34129.9477693675

> <r_psp_Prime_Solv_GB>
-5189.88752580966

> <r_psp_Prime_Coulomb>
-26490.9868185052

> <r_psp_Prime_vdW>
-4048.19138000071

> <r_psp_Prime_Covalent>
4422.04303902359

> <i_psp_model_num>
0

> <r_psp_Prime_Lipo>
-2176.31785873288

> <s_psp_Prime_Energy_Force_Field>
S-OPLS

> <s_psp_Prime_Energy_Solvent_Model>
VSGB2.1

> <r_psp_Prime_Hbond>
-550.354691355139

> <r_psp_Prime_Packing>
-55.8446424272089

> <r_psp_Prime_SelfCont>
-40.4078915603482

> <r_psp_Memb1_x>
103.457542316003

> <r_psp_Memb1_y>
39.4731108300965

> <r_psp_Memb1_z>
48.7987221124676

> <r_psp_Memb2_x>
99.8134167309003

> <r_psp_Memb2_y>
2.81176945184187

> <r_psp_Memb2_z>
23.8404289603493

> <r_psp_MembDummyRadius>
4.45

> <r_psp_Prime_Bond_Covalent>
467.896767676274

> <r_psp_Prime_Bond_SGB>
49980.1038035099

> <r_psp_Prime_Angle_Covalent>
2228.67806325784

> <r_psp_Prime_Angle_SGB>
-21661.3718874806

> <r_psp_Prime_Torsion_Covalent>
1725.46820808947

> <r_psp_Prime_NB14_LJ>
4248.16293467936

> <r_psp_Prime_NB14_Lipo>
0

> <r_psp_Prime_NB14_Elec>
25532.3665409345

> <r_psp_Prime_NB14_SGB>
-15615.3715553298

> <r_psp_Prime_NBShort_LJ>
-7881.6206967356

> <r_psp_Prime_NBShort_Lipo>
-2176.31785873288

> <r_psp_Prime_NBShort_Elec>
-53041.6565274562

> <r_psp_Prime_NBShort_SGB>
18018.3510340873

> <r_psp_Prime_NBLong_LJ>
-414.733617944462

> <r_psp_Prime_NBLong_Lipo>
0

> <r_psp_Prime_NBLong_Elec>
1018.30316801646

> <r_psp_Prime_NBLong_SGB>
-1165.48848230144

> <r_psp_Prime_Self_SGB>
-34746.1104382951

> <s_m_Source_Path>
F:\Dekstop_files\DAC4,5\Molecular Systems Desgn and Engineering\supplementary_str

> <s_m_Source_File>
1000_str.mae

> <i_m_Source_File_Index>
826

> <i_lp_mmshare_version>
53156

> <s_epik_input>
bjFbY0hdW2NIXVtjSF1bY0hdYzFbTkhdYyhjKGMyMylbY0hdW2NIXVtjSF1bY0hdMiljKFtuSF0zKUMoPU8pW05IXVtDSF00W0NIMl1bQ0gyXVtDSDJdW0NIMl1bQ0gyXTQ=

> <s_epik_cmdline>
J2VwaWtfcHl0aG9uJywgJy1waHQnLCAnMC4wJywgJy1waCcsICc3LjAnLCAnLXRuJywgJzgnLCAnLW1hJywgJzUwMCcsICctaW1hZScsICc8aW5maWxlLm1hZT4nLCAnLW9tYWUnLCAnPG91dGZpbGUubWFlPic=

> <r_lp_tautomer_probability>
1

> <r_epik_Ionization_Penalty>
  0.0174

> <r_epik_Ionization_Penalty_Charging>
  0.0000

> <r_epik_Ionization_Penalty_Neutral>
  0.0174

> <r_epik_State_Penalty>
  0.0000

> <r_epik_Charging_Adjusted_Penalty>
0

> <i_epik_Tot_Q>
0

> <i_epik_Tot_abs_Q>
0

> <s_lp_Force_Field>
S-OPLS

> <r_lp_Energy>
47.314565

> <b_lp_Chiralities_Consistent>
1

> <s_lp_Variant>
ind_1,477183-1

> <s_i_glide_gridfile>
glide-grid_mmpl3

> <i_i_glide_lignum>
572

> <i_i_glide_rotatable_bonds>
5

> <r_i_docking_score>
-8.4570046242463

> <r_i_glide_ligand_efficiency>
-0.338280184969852

> <r_i_glide_ligand_efficiency_sa>
-0.989137260276473

> <r_i_glide_ligand_efficiency_ln>
-2.00456353192393

> <r_i_glide_gscore>
-8.4570046242463

> <r_i_glide_evdw>
-46.2170867919922

> <r_i_glide_ecoul>
-1.25659000873566

> <r_i_glide_energy>
-47.4736768007278

> <r_i_glide_einternal>
11.9560241699219

> <r_i_glide_emodel>
-63.1447907994161

> <i_i_glide_confnum>
117

> <i_i_glide_posenum>
327

> <r_i_glide_eff_state_penalty>
0

> <i_rge_num_r_groups>
1

> <r_rge_occupation_R1>
1

> <s_rge_R1>
477183

> <s_rge_R1_s_m_title>
477183

> <s_rge_R1_s_m_entry_id>
16395

> <s_rge_R1_s_m_entry_name>
eMol_BB_r-groups.234

> <s_rge_R1_s_m_smiles>
[*]Nc1ccccn1

> <b_rge_R1_b_sd_chiral_flag>
0

> <i_rge_R1_i_sd_version>
0

> <s_rge_R1_s_m_Source_File>
eMol_BB_r-groups-dedup.mae

> <i_rge_R1_i_m_Source_File_Index>
161

> <s_rge_R1_s_m_Source_Path>
/Users/konze/projects/pathfinder/r-groups

> <s_rge_R1_s_sd_Source_Path>
/Users/konze/projects/pathfinder/reactant sets/eMolecules

> <s_rge_R1_s_sd_Source_File>
eMol BB r-groups.mae

> <i_rge_R1_i_sd_Source_File_Index>
234

> <r_rge_R1_r_sd_MW>
94.1145

> <i_rge_R1_i_sd_RB>
0

> <i_rge_R1_i_sd_HeavyAtomCount>
7

> <i_rge_R1_i_sd_HBA>
1

> <i_rge_R1_i_sd_HBD>
1

> <r_rge_R1_r_sd_PSA>
38.91

> <i_rge_R1_i_sd_ChiralCenterCount>
0

> <i_rge_R1_i_sd_ChiralCenterCountAllPossible>
0

> <i_rge_R1_i_sd_RingCount>
1

> <r_rge_R1_r_sd_AlogP>
0.4746

> <s_rge_R1_s_sd_subgroup_title>
eMol BB r-groups

> <s_rge_R1_s_sd_subgroupid>
eMol BB r-groups

> <i_rge_R1_i_sd_subgroup_collapsed>
0

> <s_rge_R1_s_sd_Unique_SMILES_Stereo>
Nc1ccccn1

> <i_rge_R1_i_sd_canvasUID>
179

> <s_rge_R1_s_canvas_Unique_SMILES_Stereo>
Nc1ccccn1

> <s_psp_Prime_MMGBSA_Input_Structure_Hash>
58350ff2358c2264bbaa7c797c4861d6242606f75120da6b6c785061

> <i_psp_number_heavy_atoms>
25

> <r_psp_MMGBSA_dG_Bind>
-45.5135415443438

> <r_psp_MMGBSA_dG_Bind_Coulomb>
-5.72339019829087

> <r_psp_MMGBSA_dG_Bind_Covalent>
4.57755893880949

> <r_psp_MMGBSA_dG_Bind_Hbond>
-0.257086271957746

> <r_psp_MMGBSA_dG_Bind_Lipo>
-24.1901682257785

> <r_psp_MMGBSA_dG_Bind_Packing>
4.9737991503207e-014

> <r_psp_MMGBSA_dG_Bind_SelfCont>
7.105427357601e-015

> <r_psp_MMGBSA_dG_Bind_Solv_GB>
27.7518410529101

> <r_psp_MMGBSA_dG_Bind_vdW>
-47.6722968399467

> <r_psp_Lig_Strain_Energy>
5.5507058019725

> <r_psp_Lig_Strain_Coulomb>
-1.41023834206743

> <r_psp_Lig_Strain_Covalent>
4.57775980692242

> <r_psp_Lig_Strain_Hbond>
0

> <r_psp_Lig_Strain_Lipo>
0.0485648064121715

> <r_psp_Lig_Strain_Packing>
0

> <r_psp_Lig_Strain_SelfCont>
0

> <r_psp_Lig_Strain_Solv_GB>
-0.026694774032336

> <r_psp_Lig_Strain_vdW>
2.36131430473769

> <r_psp_Ligand_Energy>
10.8168129106098

> <r_psp_Ligand_Coulomb>
-26.3476143638941

> <r_psp_Ligand_Covalent>
27.0589542633724

> <r_psp_Ligand_Hbond>
0

> <r_psp_Ligand_Lipo>
-1.60305816962022

> <r_psp_Ligand_Packing>
0

> <r_psp_Ligand_SelfCont>
0

> <r_psp_Ligand_Solv_GB>
-11.0875864999799

> <r_psp_Ligand_vdW>
22.7961176807317

> <r_psp_Complex_Energy>
-34129.9477693675

> <r_psp_Complex_Coulomb>
-26490.9868185052

> <r_psp_Complex_Covalent>
4422.04303902359

> <r_psp_Complex_Hbond>
-550.354691355139

> <r_psp_Complex_Lipo>
-2176.31785873288

> <r_psp_Complex_Packing>
-55.8446424272089

> <r_psp_Complex_SelfCont>
-40.4078915603482

> <r_psp_Complex_Solv_GB>
-5189.88752580966

> <r_psp_Complex_vdW>
-4048.19138000071

> <r_psp_Receptor_Energy>
-34095.2510407338

> <r_psp_Receptor_Coulomb>
-26458.915813943

> <r_psp_Receptor_Covalent>
4390.40652582141

> <r_psp_Receptor_Hbond>
-550.097605083181

> <r_psp_Receptor_Lipo>
-2150.52463233748

> <r_psp_Receptor_Packing>
-55.8446424272089

> <r_psp_Receptor_SelfCont>
-40.4078915603482

> <r_psp_Receptor_Solv_GB>
-5206.55178036259

> <r_psp_Receptor_vdW>
-4023.31520084149

> <r_psp_MMGBSA_dG_Bind(NS)>
-51.0642473462649

> <r_psp_MMGBSA_dG_Bind(NS)_Coulomb>
-4.31315185626227

> <r_psp_MMGBSA_dG_Bind(NS)_Covalent>
-0.000200868112187891

> <r_psp_MMGBSA_dG_Bind(NS)_Hbond>
-0.257086271957519

> <r_psp_MMGBSA_dG_Bind(NS)_Lipo>
-24.2387330321853

> <r_psp_MMGBSA_dG_Bind(NS)_Packing>
0

> <r_psp_MMGBSA_dG_Bind(NS)_SelfCont>
0

> <r_psp_MMGBSA_dG_Bind(NS)_Solv_GB>
27.7785358269448

> <r_psp_MMGBSA_dG_Bind(NS)_vdW>
-50.0336111446891

> <r_psp_Rec_Strain_Energy>
-5.0931703299284e-011

> <r_psp_Rec_Strain_Coulomb>
4.00177668780088e-011

> <r_psp_Rec_Strain_Covalent>
-9.09494701772928e-013

> <r_psp_Rec_Strain_Hbond>
-2.27373675443232e-013

> <r_psp_Rec_Strain_Lipo>
-5.00222085975111e-012

> <r_psp_Rec_Strain_Packing>
4.9737991503207e-014

> <r_psp_Rec_Strain_SelfCont>
7.105427357601e-015

> <r_psp_Rec_Strain_Solv_GB>
-1.81898940354586e-012

> <r_psp_Rec_Strain_vdW>
4.54747350886464e-012

> <r_psp_Prime_MMGBSA_ligand_efficiency>
-1.82054166177375

> <r_psp_Prime_MMGBSA_ligand_efficiency_sa>
-2.73081249266063

> <r_psp_Prime_MMGBSA_ligand_efficiency_ln>
-10.7880732767871

> <r_i_glide_lipo>
-4.81698774626034

> <r_i_glide_hbond>
0

> <r_i_glide_metal>
0

> <r_i_glide_rewards>
-1.93994686424269

> <r_i_glide_erotb>
0.843229521081175

> <r_i_glide_esite>
-0.0439566939144858

> <i_psp_ExecuteFunction_Internal_Entry_Index>
1147

> <i_qp_#stars>
1

> <i_qp_#amine>
0

> <i_qp_#amidine>
0

> <i_qp_#acid>
0

> <i_qp_#amide>
0

> <i_qp_#rotor>
4

> <i_qp_#rtvFG>
0

> <i_qp_CNS>
0

> <r_qp_mol_MW>
   334.420

> <r_qp_dipole>
     6.866

> <r_qp_SASA>
   650.732

> <r_qp_FOSA>
   237.581

> <r_qp_FISA>
    89.681

> <r_qp_PISA>
   323.471

> <r_qp_WPSA>
     0.000

> <r_qp_volume>
  1120.420

> <r_qp_donorHB>
     2.000

> <r_qp_accptHB>
     3.000

> <r_qp_dip^2/V>
   0.0420803

> <r_qp_ACxDN^.5/SA>
   0.0065198

> <r_qp_glob>
   0.8017090

> <r_qp_QPpolrz>
    39.206

> <r_qp_QPlogPC16>
    11.979

> <r_qp_QPlogPoct>
    17.842

> <r_qp_QPlogPw>
     9.097

> <r_qp_QPlogPo/w>
     4.591

> <r_qp_QPlogS>
    -6.175

> <r_qp_CIQPlogS>
    -5.552

> <r_qp_QPlogHERG>
    -6.283

> <r_qp_QPPCaco>
  1397.841

> <r_qp_QPlogBB>
    -0.608

> <r_qp_QPPMDCK>
   710.514

> <r_qp_QPlogKp>
    -1.649

> <r_qp_IP(eV)>
     7.711

> <r_qp_EA(eV)>
     0.600

> <i_qp_#metab>
3

> <r_qp_QPlogKhsa>
     0.811

> <i_qp_HumanOralAbsorption>
3

> <r_qp_PercentHumanOralAbsorption>
   100.000

> <r_qp_SAfluorine>
     0.000

> <r_qp_SAamideO>
     0.000

> <r_qp_PSA>
    72.861

> <i_qp_#NandO>
5

> <i_qp_RuleOfFive>
0

> <i_qp_RuleOfThree>
1

> <i_qp_#ringatoms>
21

> <i_qp_#in34>
0

> <i_qp_#in56>
21

> <i_qp_#noncon>
6

> <i_qp_#nonHatm>
25

> <r_qp_Jm>
0.00501666070012254

> <s_m_subgroupid>
100str_copy1

> <s_m_subgroup_title>
100str

> <b_m_subgroup_collapsed>
0

$$$$
ind_1,477532
                    3D
 Structure written by MMmdl.
 48 51  0  0  1  0            999 V2000
   -3.5073   -1.6663    0.6589 C   0  0  0  0  0  0
   -2.4328   -0.7780    0.5383 C   0  0  0  0  0  0
   -1.0942   -1.2141    0.3174 C   0  0  0  0  0  0
   -0.8614   -2.5970    0.1888 C   0  0  0  0  0  0
   -1.9292   -3.4845    0.3056 C   0  0  0  0  0  0
   -3.2217   -3.0258    0.5397 C   0  0  0  0  0  0
   -0.2643   -0.0294    0.2701 C   0  0  0  0  0  0
   -1.1136    1.0749    0.3956 C   0  0  0  0  0  0
   -2.3936    0.5957    0.5872 N   0  0  0  0  0  0
   -0.7746    2.4865    0.4084 C   0  0  0  0  0  0
   -1.8266    3.3302    0.3692 N   0  0  0  0  0  0
    0.3970    2.8646    0.4592 O   0  0  0  0  0  0
   -1.7529    4.7929    0.3592 C   0  0  0  0  0  0
   -1.1625    5.4112   -0.9368 C   0  0  0  0  0  0
   -1.1510    6.9527   -0.9380 C   0  0  0  0  0  0
   -2.5229    7.5475   -0.5825 C   0  0  0  0  0  0
   -3.0318    7.0055    0.7629 C   0  0  0  0  0  0
   -3.0790    5.4651    0.7906 C   0  0  0  0  0  0
   -4.5172   -1.3237    0.8303 H   0  0  0  0  0  0
    0.1319   -2.9767    0.0011 H   0  0  0  0  0  0
   -1.7515   -4.5459    0.2117 H   0  0  0  0  0  0
   -4.0256   -3.7424    0.6249 H   0  0  0  0  0  0
   -3.1773    1.2153    0.7318 H   0  0  0  0  0  0
   -2.7449    2.9376    0.2278 H   0  0  0  0  0  0
   -1.0493    5.0651    1.1503 H   0  0  0  0  0  0
   -0.1470    5.0503   -1.1050 H   0  0  0  0  0  0
   -1.7595    5.0794   -1.7878 H   0  0  0  0  0  0
   -0.4078    7.3078   -0.2223 H   0  0  0  0  0  0
   -0.8290    7.3195   -1.9134 H   0  0  0  0  0  0
   -2.4580    8.6356   -0.5444 H   0  0  0  0  0  0
   -3.2410    7.3111   -1.3692 H   0  0  0  0  0  0
   -2.3829    7.3611    1.5648 H   0  0  0  0  0  0
   -4.0225    7.4099    0.9741 H   0  0  0  0  0  0
   -3.8724    5.1451    0.1131 H   0  0  0  0  0  0
   -3.3630    5.1320    1.7899 H   0  0  0  0  0  0
    1.1051   -0.0355    0.0915 N   0  0  0  0  0  0
    2.0550   -0.8900    0.6760 C   0  0  0  0  0  0
    3.3293   -0.9352    0.1052 C   0  0  0  0  0  0
    4.3152   -1.7512    0.6542 C   0  0  0  0  0  0
    4.0292   -2.5146    1.7835 C   0  0  0  0  0  0
    2.7682   -2.4639    2.3722 C   0  0  0  0  0  0
    1.7829   -1.6478    1.8230 C   0  0  0  0  0  0
    1.5370    0.7323   -0.4027 H   0  0  0  0  0  0
    3.5597   -0.3436   -0.7694 H   0  0  0  0  0  0
    5.2973   -1.7900    0.2067 H   0  0  0  0  0  0
    4.7941   -3.1466    2.2102 H   0  0  0  0  0  0
    2.5564   -3.0506    3.2537 H   0  0  0  0  0  0
    0.8153   -1.6043    2.3005 H   0  0  0  0  0  0
  1  2  2  0  0  0
  1  6  1  0  0  0
  1 19  1  0  0  0
  2  3  1  0  0  0
  2  9  1  0  0  0
  3  4  2  0  0  0
  3  7  1  0  0  0
  4  5  1  0  0  0
  4 20  1  0  0  0
  5  6  2  0  0  0
  5 21  1  0  0  0
  6 22  1  0  0  0
  7  8  2  0  0  0
  7 36  1  0  0  0
  8  9  1  0  0  0
  8 10  1  0  0  0
  9 23  1  0  0  0
 10 11  1  0  0  0
 10 12  2  0  0  0
 11 13  1  0  0  0
 11 24  1  0  0  0
 13 18  1  0  0  0
 13 14  1  0  0  0
 13 25  1  0  0  0
 14 15  1  0  0  0
 14 26  1  0  0  0
 14 27  1  0  0  0
 15 16  1  0  0  0
 15 28  1  0  0  0
 15 29  1  0  0  0
 16 17  1  0  0  0
 16 30  1  0  0  0
 16 31  1  0  0  0
 17 18  1  0  0  0
 17 32  1  0  0  0
 17 33  1  0  0  0
 18 34  1  0  0  0
 18 35  1  0  0  0
 36 37  1  0  0  0
 36 43  1  0  0  0
 37 42  1  0  0  0
 37 38  2  0  0  0
 38 39  1  0  0  0
 38 44  1  0  0  0
 39 40  2  0  0  0
 39 45  1  0  0  0
 40 41  1  0  0  0
 40 46  1  0  0  0
 41 42  2  0  0  0
 41 47  1  0  0  0
 42 48  1  0  0  0
M  END
> <s_m_entry_id>
8130

> <s_m_entry_name>
entry

> <i_f3d_flags>
0

> <s_m_job_name>
adme_1000

> <r_psp_Prime_Energy>
-34113.5797423511

> <r_psp_Prime_Solv_GB>
-5186.87528134503

> <r_psp_Prime_Coulomb>
-26475.8000691548

> <r_psp_Prime_vdW>
-4050.48855716984

> <r_psp_Prime_Covalent>
4424.04413939383

> <i_psp_model_num>
0

> <r_psp_Prime_Lipo>
-2178.08024308445

> <s_psp_Prime_Energy_Force_Field>
S-OPLS

> <s_psp_Prime_Energy_Solvent_Model>
VSGB2.1

> <r_psp_Prime_Hbond>
-550.127197003285

> <r_psp_Prime_Packing>
-55.8446424272089

> <r_psp_Prime_SelfCont>
-40.4078915603482

> <r_psp_Memb1_x>
103.457542316003

> <r_psp_Memb1_y>
39.4731108300965

> <r_psp_Memb1_z>
48.7987221124676

> <r_psp_Memb2_x>
99.8134167309003

> <r_psp_Memb2_y>
2.81176945184187

> <r_psp_Memb2_z>
23.8404289603493

> <r_psp_MembDummyRadius>
4.45

> <r_psp_Prime_Bond_Covalent>
467.557091343948

> <r_psp_Prime_Bond_SGB>
49980.965365366

> <r_psp_Prime_Angle_Covalent>
2223.58168208058

> <r_psp_Prime_Angle_SGB>
-21657.4619684581

> <r_psp_Prime_Torsion_Covalent>
1732.9053659693

> <r_psp_Prime_NB14_LJ>
4246.56301675716

> <r_psp_Prime_NB14_Lipo>
0

> <r_psp_Prime_NB14_Elec>
25544.3138156392

> <r_psp_Prime_NB14_SGB>
-15621.6512135386

> <r_psp_Prime_NBShort_LJ>
-7882.24586173444

> <r_psp_Prime_NBShort_Lipo>
-2178.08024308445

> <r_psp_Prime_NBShort_Elec>
-53038.0913959224

> <r_psp_Prime_NBShort_SGB>
18021.8012179009

> <r_psp_Prime_NBLong_LJ>
-414.80571219256

> <r_psp_Prime_NBLong_Lipo>
0

> <r_psp_Prime_NBLong_Elec>
1017.97751112845

> <r_psp_Prime_NBLong_SGB>
-1161.88281655186

> <r_psp_Prime_Self_SGB>
-34748.6458660634

> <s_m_Source_Path>
F:\Dekstop_files\DAC4,5\Molecular Systems Desgn and Engineering\supplementary_str

> <s_m_Source_File>
1000_str.mae

> <i_m_Source_File_Index>
981

> <i_lp_mmshare_version>
53156

> <s_epik_input>
W2NIXTFbY0hdW2NIXVtjSF1bY0hdYzFbTkhdYyhjKGMyMylbY0hdW2NIXVtjSF1bY0hdMiljKFtuSF0zKUMoPU8pW05IXVtDSF00W0NIMl1bQ0gyXVtDSDJdW0NIMl1bQ0gyXTQ=

> <s_epik_cmdline>
J2VwaWtfcHl0aG9uJywgJy1waHQnLCAnMC4wJywgJy1waCcsICc3LjAnLCAnLXRuJywgJzgnLCAnLW1hJywgJzUwMCcsICctaW1hZScsICc8aW5maWxlLm1hZT4nLCAnLW9tYWUnLCAnPG91dGZpbGUubWFlPic=

> <r_lp_tautomer_probability>
1

> <r_epik_Ionization_Penalty>
  0.0000

> <r_epik_Ionization_Penalty_Charging>
  0.0000

> <r_epik_Ionization_Penalty_Neutral>
  0.0000

> <r_epik_State_Penalty>
  0.0000

> <r_epik_Charging_Adjusted_Penalty>
0

> <i_epik_Tot_Q>
0

> <i_epik_Tot_abs_Q>
0

> <s_lp_Force_Field>
S-OPLS

> <r_lp_Energy>
45.940903

> <b_lp_Chiralities_Consistent>
1

> <s_lp_Variant>
ind_1,477532-1

> <s_i_glide_gridfile>
glide-grid_mmpl3

> <i_i_glide_lignum>
582

> <i_i_glide_rotatable_bonds>
5

> <r_i_docking_score>
-8.30214177096555

> <r_i_glide_ligand_efficiency>
-0.332085670838622

> <r_i_glide_ligand_efficiency_sa>
-0.971024391096581

> <r_i_glide_ligand_efficiency_ln>
-1.96785639483118

> <r_i_glide_gscore>
-8.30214177096555

> <r_i_glide_evdw>
-39.6240119934082

> <r_i_glide_ecoul>
-0.633990287780762

> <r_i_glide_energy>
-40.258002281189

> <r_i_glide_einternal>
4.34546089172363

> <r_i_glide_emodel>
-57.6759878918319

> <i_i_glide_confnum>
68

> <i_i_glide_posenum>
373

> <r_i_glide_eff_state_penalty>
0

> <i_rge_num_r_groups>
1

> <r_rge_occupation_R1>
1

> <s_rge_R1>
477532

> <s_rge_R1_s_m_title>
477532

> <s_rge_R1_s_m_entry_id>
16405

> <s_rge_R1_s_m_entry_name>
eMol_BB_r-groups.236

> <s_rge_R1_s_m_smiles>
[*]Nc1ccccc1

> <b_rge_R1_b_sd_chiral_flag>
0

> <i_rge_R1_i_sd_version>
0

> <s_rge_R1_s_m_Source_File>
eMol_BB_r-groups-dedup.mae

> <i_rge_R1_i_m_Source_File_Index>
163

> <s_rge_R1_s_m_Source_Path>
/Users/konze/projects/pathfinder/r-groups

> <s_rge_R1_s_sd_Source_Path>
/Users/konze/projects/pathfinder/reactant sets/eMolecules

> <s_rge_R1_s_sd_Source_File>
eMol BB r-groups.mae

> <i_rge_R1_i_sd_Source_File_Index>
236

> <r_rge_R1_r_sd_MW>
93.1265

> <i_rge_R1_i_sd_RB>
0

> <i_rge_R1_i_sd_HeavyAtomCount>
7

> <i_rge_R1_i_sd_HBA>
0

> <i_rge_R1_i_sd_HBD>
1

> <r_rge_R1_r_sd_PSA>
26.02

> <i_rge_R1_i_sd_ChiralCenterCount>
0

> <i_rge_R1_i_sd_ChiralCenterCountAllPossible>
0

> <i_rge_R1_i_sd_RingCount>
1

> <r_rge_R1_r_sd_AlogP>
1.0834

> <s_rge_R1_s_sd_subgroup_title>
eMol BB r-groups

> <s_rge_R1_s_sd_subgroupid>
eMol BB r-groups

> <i_rge_R1_i_sd_subgroup_collapsed>
0

> <s_rge_R1_s_sd_Unique_SMILES_Stereo>
Nc1ccccc1

> <i_rge_R1_i_sd_canvasUID>
181

> <s_rge_R1_s_canvas_Unique_SMILES_Stereo>
Nc1ccccc1

> <s_psp_Prime_MMGBSA_Input_Structure_Hash>
ba1f2cab97f45913f734aab4df40dfaaeca85ede0db2213925572567

> <i_psp_number_heavy_atoms>
25

> <r_psp_MMGBSA_dG_Bind>
-43.8800911093131

> <r_psp_MMGBSA_dG_Bind_Coulomb>
-4.44215381972754

> <r_psp_MMGBSA_dG_Bind_Covalent>
5.51200260702808

> <r_psp_MMGBSA_dG_Bind_Hbond>
-0.0295919201039396

> <r_psp_MMGBSA_dG_Bind_Lipo>
-25.6769208290684

> <r_psp_MMGBSA_dG_Bind_Packing>
4.9737991503207e-014

> <r_psp_MMGBSA_dG_Bind_SelfCont>
7.105427357601e-015

> <r_psp_MMGBSA_dG_Bind_Solv_GB>
28.4271481311671

> <r_psp_MMGBSA_dG_Bind_vdW>
-47.6705752785183

> <r_psp_Lig_Strain_Energy>
7.01843327760997

> <r_psp_Lig_Strain_Coulomb>
0.464538428016962

> <r_psp_Lig_Strain_Covalent>
5.51220347514339

> <r_psp_Lig_Strain_Hbond>
0

> <r_psp_Lig_Strain_Lipo>
0.0975107128448616

> <r_psp_Lig_Strain_Packing>
0

> <r_psp_Lig_Strain_SelfCont>
0

> <r_psp_Lig_Strain_Solv_GB>
-0.108915886700714

> <r_psp_Lig_Strain_vdW>
1.05309654830545

> <r_psp_Ligand_Energy>
25.5513894920001

> <r_psp_Ligand_Coulomb>
-12.442101392055

> <r_psp_Ligand_Covalent>
28.1256109653886

> <r_psp_Ligand_Hbond>
0

> <r_psp_Ligand_Lipo>
-1.87868991789671

> <r_psp_Ligand_Packing>
0

> <r_psp_Ligand_SelfCont>
0

> <r_psp_Ligand_Solv_GB>
-8.75064911360357

> <r_psp_Ligand_vdW>
20.4972189501668

> <r_psp_Complex_Energy>
-34113.5797423511

> <r_psp_Complex_Coulomb>
-26475.8000691548

> <r_psp_Complex_Covalent>
4424.04413939383

> <r_psp_Complex_Hbond>
-550.127197003285

> <r_psp_Complex_Lipo>
-2178.08024308445

> <r_psp_Complex_Packing>
-55.8446424272089

> <r_psp_Complex_SelfCont>
-40.4078915603482

> <r_psp_Complex_Solv_GB>
-5186.87528134503

> <r_psp_Complex_vdW>
-4050.48855716984

> <r_psp_Receptor_Energy>
-34095.2510407338

> <r_psp_Receptor_Coulomb>
-26458.915813943

> <r_psp_Receptor_Covalent>
4390.40652582141

> <r_psp_Receptor_Hbond>
-550.097605083181

> <r_psp_Receptor_Lipo>
-2150.52463233748

> <r_psp_Receptor_Packing>
-55.8446424272089

> <r_psp_Receptor_SelfCont>
-40.4078915603482

> <r_psp_Receptor_Solv_GB>
-5206.55178036259

> <r_psp_Receptor_vdW>
-4023.31520084149

> <r_psp_MMGBSA_dG_Bind(NS)>
-50.8985243868738

> <r_psp_MMGBSA_dG_Bind(NS)_Coulomb>
-4.90669224778321

> <r_psp_MMGBSA_dG_Bind(NS)_Covalent>
-0.00020086811400688

> <r_psp_MMGBSA_dG_Bind(NS)_Hbond>
-0.0295919201037123

> <r_psp_MMGBSA_dG_Bind(NS)_Lipo>
-25.7744315419081

> <r_psp_MMGBSA_dG_Bind(NS)_Packing>
0

> <r_psp_MMGBSA_dG_Bind(NS)_SelfCont>
0

> <r_psp_MMGBSA_dG_Bind(NS)_Solv_GB>
28.5360640178696

> <r_psp_MMGBSA_dG_Bind(NS)_vdW>
-48.7236718268282

> <r_psp_Rec_Strain_Energy>
-5.0931703299284e-011

> <r_psp_Rec_Strain_Coulomb>
4.00177668780088e-011

> <r_psp_Rec_Strain_Covalent>
-9.09494701772928e-013

> <r_psp_Rec_Strain_Hbond>
-2.27373675443232e-013

> <r_psp_Rec_Strain_Lipo>
-5.00222085975111e-012

> <r_psp_Rec_Strain_Packing>
4.9737991503207e-014

> <r_psp_Rec_Strain_SelfCont>
7.105427357601e-015

> <r_psp_Rec_Strain_Solv_GB>
-1.81898940354586e-012

> <r_psp_Rec_Strain_vdW>
4.54747350886464e-012

> <r_psp_Prime_MMGBSA_ligand_efficiency>
-1.75520364437252

> <r_psp_Prime_MMGBSA_ligand_efficiency_sa>
-2.63280546655878

> <r_psp_Prime_MMGBSA_ligand_efficiency_ln>
-10.4008965731254

> <r_i_glide_lipo>
-5.03137210094046

> <r_i_glide_hbond>
0

> <r_i_glide_metal>
0

> <r_i_glide_rewards>
-2.04129938143478

> <r_i_glide_erotb>
0.847656266053496

> <r_i_glide_esite>
-0.000827411806280429

> <i_psp_ExecuteFunction_Internal_Entry_Index>
1390

> <i_qp_#stars>
2

> <i_qp_#amine>
0

> <i_qp_#amidine>
0

> <i_qp_#acid>
0

> <i_qp_#amide>
0

> <i_qp_#rotor>
4

> <i_qp_#rtvFG>
0

> <i_qp_CNS>
0

> <r_qp_mol_MW>
   333.432

> <r_qp_dipole>
     5.981

> <r_qp_SASA>
   657.872

> <r_qp_FOSA>
   238.454

> <r_qp_FISA>
    65.351

> <r_qp_PISA>
   354.067

> <r_qp_WPSA>
     0.000

> <r_qp_volume>
  1133.721

> <r_qp_donorHB>
     2.000

> <r_qp_accptHB>
     2.000

> <r_qp_dip^2/V>
   0.0315568

> <r_qp_ACxDN^.5/SA>
   0.0042994

> <r_qp_glob>
   0.7992720

> <r_qp_QPpolrz>
    40.030

> <r_qp_QPlogPC16>
    12.156

> <r_qp_QPlogPoct>
    17.368

> <r_qp_QPlogPw>
     8.172

> <r_qp_QPlogPo/w>
     5.271

> <r_qp_QPlogS>
    -6.612

> <r_qp_CIQPlogS>
    -5.892

> <r_qp_QPlogHERG>
    -6.469

> <r_qp_QPPCaco>
  2377.789

> <r_qp_QPlogBB>
    -0.360

> <r_qp_QPPMDCK>
  1261.679

> <r_qp_QPlogKp>
    -1.093

> <r_qp_IP(eV)>
     7.532

> <r_qp_EA(eV)>
     0.481

> <i_qp_#metab>
3

> <r_qp_QPlogKhsa>
     1.021

> <i_qp_HumanOralAbsorption>
1

> <r_qp_PercentHumanOralAbsorption>
   100.000

> <r_qp_SAfluorine>
     0.000

> <r_qp_SAamideO>
     0.000

> <r_qp_PSA>
    60.535

> <i_qp_#NandO>
4

> <i_qp_RuleOfFive>
1

> <i_qp_RuleOfThree>
1

> <i_qp_#ringatoms>
21

> <i_qp_#in34>
0

> <i_qp_#in56>
21

> <i_qp_#noncon>
6

> <i_qp_#nonHatm>
25

> <r_qp_Jm>
0.0065819760394102

> <s_m_subgroupid>
100str_copy1

> <s_m_subgroup_title>
100str

> <b_m_subgroup_collapsed>
0

$$$$
ind_1,478031
                    3D
 Structure written by MMmdl.
 53 56  0  0  1  0            999 V2000
   -3.5290   -1.3713    0.0777 C   0  0  0  0  0  0
   -2.3615   -0.6001    0.0725 C   0  0  0  0  0  0
   -1.0653   -1.1811   -0.0343 C   0  0  0  0  0  0
   -0.9578   -2.5772   -0.1432 C   0  0  0  0  0  0
   -2.1198   -3.3468   -0.1420 C   0  0  0  0  0  0
   -3.3751   -2.7538   -0.0329 C   0  0  0  0  0  0
   -0.1199   -0.1026    0.0155 C   0  0  0  0  0  0
   -0.8397    1.0940    0.0754 C   0  0  0  0  0  0
   -2.1743    0.7628    0.1626 N   0  0  0  0  0  0
   -0.3751    2.4557    0.1898 C   0  0  0  0  0  0
    0.8824    2.6505   -0.2493 N   0  0  0  0  0  0
   -1.0932    3.3477    0.6463 O   0  0  0  0  0  0
    1.6328    3.9041   -0.1803 C   0  0  0  0  0  0
    2.0906    4.2957    1.2501 C   0  0  0  0  0  0
    2.9394    5.5809    1.2995 C   0  0  0  0  0  0
    4.1098    5.5456    0.3036 C   0  0  0  0  0  0
    3.6163    5.2693   -1.1258 C   0  0  0  0  0  0
    2.7829    3.9758   -1.2145 C   0  0  0  0  0  0
   -4.5094   -0.9256    0.1614 H   0  0  0  0  0  0
    0.0096   -3.0508   -0.2234 H   0  0  0  0  0  0
   -2.0459   -4.4212   -0.2254 H   0  0  0  0  0  0
   -4.2533   -3.3826   -0.0338 H   0  0  0  0  0  0
   -2.8905    1.4682    0.2601 H   0  0  0  0  0  0
    1.4016    1.8414   -0.5595 H   0  0  0  0  0  0
    0.9462    4.6960   -0.4913 H   0  0  0  0  0  0
    1.2277    4.4133    1.9071 H   0  0  0  0  0  0
    2.6908    3.4824    1.6617 H   0  0  0  0  0  0
    2.3040    6.4404    1.0798 H   0  0  0  0  0  0
    3.3174    5.7359    2.3109 H   0  0  0  0  0  0
    4.6516    6.4917    0.3334 H   0  0  0  0  0  0
    4.8222    4.7746    0.6017 H   0  0  0  0  0  0
    3.0135    6.1113   -1.4697 H   0  0  0  0  0  0
    4.4666    5.2091   -1.8064 H   0  0  0  0  0  0
    3.4593    3.1355   -1.0511 H   0  0  0  0  0  0
    2.3874    3.8706   -2.2260 H   0  0  0  0  0  0
    1.2429   -0.2429   -0.0405 O   0  0  0  0  0  0
    1.8920   -0.1560    1.2291 C   0  0  0  0  0  0
    1.8210   -1.4854    2.0161 C   0  0  0  0  0  0
    2.5449   -1.3579    3.3732 C   0  0  0  0  0  0
    4.0007   -0.8710    3.2089 C   0  0  0  0  0  0
    4.0980    0.4101    2.3536 C   0  0  0  0  0  0
    3.3618    0.2562    1.0071 C   0  0  0  0  0  0
    1.4244    0.6298    1.8297 H   0  0  0  0  0  0
    0.7849   -1.7720    2.1979 H   0  0  0  0  0  0
    2.3011   -2.2819    1.4457 H   0  0  0  0  0  0
    2.0000   -0.6599    4.0108 H   0  0  0  0  0  0
    2.5318   -2.3165    3.8931 H   0  0  0  0  0  0
    4.4475   -0.6981    4.1885 H   0  0  0  0  0  0
    4.5923   -1.6597    2.7413 H   0  0  0  0  0  0
    3.6736    1.2499    2.9065 H   0  0  0  0  0  0
    5.1447    0.6611    2.1785 H   0  0  0  0  0  0
    3.8789   -0.5043    0.4197 H   0  0  0  0  0  0
    3.4150    1.1996    0.4638 H   0  0  0  0  0  0
  1  2  2  0  0  0
  1  6  1  0  0  0
  1 19  1  0  0  0
  2  3  1  0  0  0
  2  9  1  0  0  0
  3  4  2  0  0  0
  3  7  1  0  0  0
  4  5  1  0  0  0
  4 20  1  0  0  0
  5  6  2  0  0  0
  5 21  1  0  0  0
  6 22  1  0  0  0
  7  8  2  0  0  0
  7 36  1  0  0  0
  8  9  1  0  0  0
  8 10  1  0  0  0
  9 23  1  0  0  0
 10 11  1  0  0  0
 10 12  2  0  0  0
 11 13  1  0  0  0
 11 24  1  0  0  0
 13 18  1  0  0  0
 13 14  1  0  0  0
 13 25  1  0  0  0
 14 15  1  0  0  0
 14 26  1  0  0  0
 14 27  1  0  0  0
 15 16  1  0  0  0
 15 28  1  0  0  0
 15 29  1  0  0  0
 16 17  1  0  0  0
 16 30  1  0  0  0
 16 31  1  0  0  0
 17 18  1  0  0  0
 17 32  1  0  0  0
 17 33  1  0  0  0
 18 34  1  0  0  0
 18 35  1  0  0  0
 36 37  1  0  0  0
 37 42  1  0  0  0
 37 38  1  0  0  0
 37 43  1  0  0  0
 38 39  1  0  0  0
 38 44  1  0  0  0
 38 45  1  0  0  0
 39 40  1  0  0  0
 39 46  1  0  0  0
 39 47  1  0  0  0
 40 41  1  0  0  0
 40 48  1  0  0  0
 40 49  1  0  0  0
 41 42  1  0  0  0
 41 50  1  0  0  0
 41 51  1  0  0  0
 42 52  1  0  0  0
 42 53  1  0  0  0
M  END
> <s_m_entry_id>
8121

> <s_m_entry_name>
entry

> <i_f3d_flags>
0

> <s_m_job_name>
adme_1000

> <r_psp_Prime_Energy>
-34115.6144562319

> <r_psp_Prime_Solv_GB>
-5188.50822192705

> <r_psp_Prime_Coulomb>
-26469.0803929457

> <r_psp_Prime_vdW>
-4051.48815010572

> <r_psp_Prime_Covalent>
4419.39359518516

> <i_psp_model_num>
0

> <r_psp_Prime_Lipo>
-2179.54609073387

> <s_psp_Prime_Energy_Force_Field>
S-OPLS

> <s_psp_Prime_Energy_Solvent_Model>
VSGB2.1

> <r_psp_Prime_Hbond>
-550.132661717197

> <r_psp_Prime_Packing>
-55.8446424272089

> <r_psp_Prime_SelfCont>
-40.4078915603482

> <r_psp_Memb1_x>
103.457542316003

> <r_psp_Memb1_y>
39.4731108300965

> <r_psp_Memb1_z>
48.7987221124676

> <r_psp_Memb2_x>
99.8134167309003

> <r_psp_Memb2_y>
2.81176945184187

> <r_psp_Memb2_z>
23.8404289603493

> <r_psp_MembDummyRadius>
4.45

> <r_psp_Prime_Bond_Covalent>
467.555337291295

> <r_psp_Prime_Bond_SGB>
49969.6342487386

> <r_psp_Prime_Angle_Covalent>
2225.43026896658

> <r_psp_Prime_Angle_SGB>
-21653.6258330155

> <r_psp_Prime_Torsion_Covalent>
1726.40798892728

> <r_psp_Prime_NB14_LJ>
4241.7985802547

> <r_psp_Prime_NB14_Lipo>
0

> <r_psp_Prime_NB14_Elec>
25556.8034019602

> <r_psp_Prime_NB14_SGB>
-15619.5468406559

> <r_psp_Prime_NBShort_LJ>
-7878.72091841996

> <r_psp_Prime_NBShort_Lipo>
-2179.54609073387

> <r_psp_Prime_NBShort_Elec>
-53042.8532505325

> <r_psp_Prime_NBShort_SGB>
18018.9522366925

> <r_psp_Prime_NBLong_LJ>
-414.565811940463

> <r_psp_Prime_NBLong_Lipo>
0

> <r_psp_Prime_NBLong_Elec>
1016.96945562658

> <r_psp_Prime_NBLong_SGB>
-1164.1553066797

> <r_psp_Prime_Self_SGB>
-34739.7667270071

> <s_m_Source_Path>
F:\Dekstop_files\DAC4,5\Molecular Systems Desgn and Engineering\supplementary_str

> <s_m_Source_File>
1000_str.mae

> <i_m_Source_File_Index>
814

> <i_lp_mmshare_version>
53156

> <s_epik_input>
W0NIMl0xW0NIMl1bQ0gyXVtDSDJdW0NIMl1bQ0hdMU9jKGMoYzIzKVtjSF1bY0hdW2NIXVtjSF0yKWMoW25IXTMpQyg9TylbTkhdW0NIXTRbQ0gyXVtDSDJdW0NIMl1bQ0gyXVtDSDJdNA==

> <s_epik_cmdline>
J2VwaWtfcHl0aG9uJywgJy1waHQnLCAnMC4wJywgJy1waCcsICc3LjAnLCAnLXRuJywgJzgnLCAnLW1hJywgJzUwMCcsICctaW1hZScsICc8aW5maWxlLm1hZT4nLCAnLW9tYWUnLCAnPG91dGZpbGUubWFlPic=

> <r_lp_tautomer_probability>
1

> <r_epik_Ionization_Penalty>
  0.0000

> <r_epik_Ionization_Penalty_Charging>
  0.0000

> <r_epik_Ionization_Penalty_Neutral>
  0.0000

> <r_epik_State_Penalty>
  0.0000

> <r_epik_Charging_Adjusted_Penalty>
0

> <i_epik_Tot_Q>
0

> <i_epik_Tot_abs_Q>
0

> <s_lp_Force_Field>
S-OPLS

> <r_lp_Energy>
35.964449

> <b_lp_Chiralities_Consistent>
1

> <s_lp_Variant>
ind_1,478031-1

> <s_i_glide_gridfile>
glide-grid_mmpl3

> <i_i_glide_lignum>
586

> <i_i_glide_rotatable_bonds>
5

> <r_i_docking_score>
-8.42717068258252

> <r_i_glide_ligand_efficiency>
-0.337086827303301

> <r_i_glide_ligand_efficiency_sa>
-0.98564786129519

> <r_i_glide_ligand_efficiency_ln>
-1.99749199369853

> <r_i_glide_gscore>
-8.42717068258252

> <r_i_glide_evdw>
-43.5445213317871

> <r_i_glide_ecoul>
-1.02404010295868

> <r_i_glide_energy>
-44.5685614347458

> <r_i_glide_einternal>
5.67204666137695

> <r_i_glide_emodel>
-65.3949393030363

> <i_i_glide_confnum>
267

> <i_i_glide_posenum>
133

> <r_i_glide_eff_state_penalty>
0

> <i_rge_num_r_groups>
1

> <r_rge_occupation_R1>
1

> <s_rge_R1>
478031

> <s_rge_R1_s_m_title>
478031

> <s_rge_R1_s_m_entry_id>
16409

> <s_rge_R1_s_m_entry_name>
eMol_BB_r-groups.237

> <s_rge_R1_s_m_smiles>
[*]OC1CCCCC1

> <b_rge_R1_b_sd_chiral_flag>
0

> <i_rge_R1_i_sd_version>
0

> <s_rge_R1_s_m_Source_File>
eMol_BB_r-groups-dedup.mae

> <i_rge_R1_i_m_Source_File_Index>
164

> <s_rge_R1_s_m_Source_Path>
/Users/konze/projects/pathfinder/r-groups

> <s_rge_R1_s_sd_Source_Path>
/Users/konze/projects/pathfinder/reactant sets/eMolecules

> <s_rge_R1_s_sd_Source_File>
eMol BB r-groups.mae

> <i_rge_R1_i_sd_Source_File_Index>
237

> <r_rge_R1_r_sd_MW>
100.1589

> <i_rge_R1_i_sd_RB>
0

> <i_rge_R1_i_sd_HeavyAtomCount>
7

> <i_rge_R1_i_sd_HBA>
1

> <i_rge_R1_i_sd_HBD>
1

> <r_rge_R1_r_sd_PSA>
20.23

> <i_rge_R1_i_sd_ChiralCenterCount>
0

> <i_rge_R1_i_sd_ChiralCenterCountAllPossible>
0

> <i_rge_R1_i_sd_RingCount>
1

> <r_rge_R1_r_sd_AlogP>
1.5003

> <s_rge_R1_s_sd_subgroup_title>
eMol BB r-groups

> <s_rge_R1_s_sd_subgroupid>
eMol BB r-groups

> <i_rge_R1_i_sd_subgroup_collapsed>
0

> <s_rge_R1_s_sd_Unique_SMILES_Stereo>
OC1CCCCC1

> <i_rge_R1_i_sd_canvasUID>
182

> <s_rge_R1_s_canvas_Unique_SMILES_Stereo>
OC1CCCCC1

> <s_psp_Prime_MMGBSA_Input_Structure_Hash>
c569136c682d1a6f4a7efd9296d6179525782e45240f0ef1fbfab611

> <i_psp_number_heavy_atoms>
25

> <r_psp_MMGBSA_dG_Bind>
-43.5810515689955

> <r_psp_MMGBSA_dG_Bind_Coulomb>
-5.37201841469869

> <r_psp_MMGBSA_dG_Bind_Covalent>
1.78345329504918

> <r_psp_MMGBSA_dG_Bind_Hbond>
-0.0350566340160867

> <r_psp_MMGBSA_dG_Bind_Lipo>
-26.7618710245374

> <r_psp_MMGBSA_dG_Bind_Packing>
4.9737991503207e-014

> <r_psp_MMGBSA_dG_Bind_SelfCont>
7.105427357601e-015

> <r_psp_MMGBSA_dG_Bind_Solv_GB>
27.7692846757591

> <r_psp_MMGBSA_dG_Bind_vdW>
-40.9648434664637

> <r_psp_Lig_Strain_Energy>
5.62513413991564

> <r_psp_Lig_Strain_Coulomb>
0.0263585901059393

> <r_psp_Lig_Strain_Covalent>
1.78365416316192

> <r_psp_Lig_Strain_Hbond>
0

> <r_psp_Lig_Strain_Lipo>
0.173606691401265

> <r_psp_Lig_Strain_Packing>
0

> <r_psp_Lig_Strain_SelfCont>
0

> <r_psp_Lig_Strain_Solv_GB>
-1.00103660564307

> <r_psp_Lig_Strain_vdW>
4.64255130088955

> <r_psp_Ligand_Energy>
23.2176360708993

> <r_psp_Ligand_Coulomb>
-4.7925605879566

> <r_psp_Ligand_Covalent>
27.2036160687017

> <r_psp_Ligand_Hbond>
0

> <r_psp_Ligand_Lipo>
-2.25958737185646

> <r_psp_Ligand_Packing>
0

> <r_psp_Ligand_SelfCont>
0

> <r_psp_Ligand_Solv_GB>
-9.72572624022062

> <r_psp_Ligand_vdW>
12.7918942022313

> <r_psp_Complex_Energy>
-34115.6144562319

> <r_psp_Complex_Coulomb>
-26469.0803929457

> <r_psp_Complex_Covalent>
4419.39359518516

> <r_psp_Complex_Hbond>
-550.132661717197

> <r_psp_Complex_Lipo>
-2179.54609073387

> <r_psp_Complex_Packing>
-55.8446424272089

> <r_psp_Complex_SelfCont>
-40.4078915603482

> <r_psp_Complex_Solv_GB>
-5188.50822192705

> <r_psp_Complex_vdW>
-4051.48815010572

> <r_psp_Receptor_Energy>
-34095.2510407338

> <r_psp_Receptor_Coulomb>
-26458.915813943

> <r_psp_Receptor_Covalent>
4390.40652582141

> <r_psp_Receptor_Hbond>
-550.097605083181

> <r_psp_Receptor_Lipo>
-2150.52463233748

> <r_psp_Receptor_Packing>
-55.8446424272089

> <r_psp_Receptor_SelfCont>
-40.4078915603482

> <r_psp_Receptor_Solv_GB>
-5206.55178036259

> <r_psp_Receptor_vdW>
-4023.31520084149

> <r_psp_MMGBSA_dG_Bind(NS)>
-49.2061857088629

> <r_psp_MMGBSA_dG_Bind(NS)_Coulomb>
-5.3983770048435

> <r_psp_MMGBSA_dG_Bind(NS)_Covalent>
-0.000200868111278396

> <r_psp_MMGBSA_dG_Bind(NS)_Hbond>
-0.0350566340158593

> <r_psp_MMGBSA_dG_Bind(NS)_Lipo>
-26.9354777159338

> <r_psp_MMGBSA_dG_Bind(NS)_Packing>
0

> <r_psp_MMGBSA_dG_Bind(NS)_SelfCont>
0

> <r_psp_MMGBSA_dG_Bind(NS)_Solv_GB>
28.770321281404

> <r_psp_MMGBSA_dG_Bind(NS)_vdW>
-45.6073947673581

> <r_psp_Rec_Strain_Energy>
-5.0931703299284e-011

> <r_psp_Rec_Strain_Coulomb>
4.00177668780088e-011

> <r_psp_Rec_Strain_Covalent>
-9.09494701772928e-013

> <r_psp_Rec_Strain_Hbond>
-2.27373675443232e-013

> <r_psp_Rec_Strain_Lipo>
-5.00222085975111e-012

> <r_psp_Rec_Strain_Packing>
4.9737991503207e-014

> <r_psp_Rec_Strain_SelfCont>
7.105427357601e-015

> <r_psp_Rec_Strain_Solv_GB>
-1.81898940354586e-012

> <r_psp_Rec_Strain_vdW>
4.54747350886464e-012

> <r_psp_Prime_MMGBSA_ligand_efficiency>
-1.74324206275982

> <r_psp_Prime_MMGBSA_ligand_efficiency_sa>
-2.61486309413973

> <r_psp_Prime_MMGBSA_ligand_efficiency_ln>
-10.3300152405782

> <r_i_glide_lipo>
-5.0776305146995

> <r_i_glide_hbond>
0

> <r_i_glide_metal>
0

> <r_i_glide_rewards>
-1.83560129070966

> <r_i_glide_erotb>
0.816893204859796

> <r_i_glide_esite>
0

> <i_psp_ExecuteFunction_Internal_Entry_Index>
1198

> <i_qp_#stars>
1

> <i_qp_#amine>
0

> <i_qp_#amidine>
0

> <i_qp_#acid>
0

> <i_qp_#amide>
0

> <i_qp_#rotor>
4

> <i_qp_#rtvFG>
0

> <i_qp_CNS>
0

> <r_qp_mol_MW>
   340.464

> <r_qp_dipole>
     2.505

> <r_qp_SASA>
   606.834

> <r_qp_FOSA>
   375.686

> <r_qp_FISA>
    60.763

> <r_qp_PISA>
   170.385

> <r_qp_WPSA>
     0.000

> <r_qp_volume>
  1121.819

> <r_qp_donorHB>
     2.000

> <r_qp_accptHB>
     3.250

> <r_qp_dip^2/V>
   0.0055916

> <r_qp_ACxDN^.5/SA>
   0.0075741

> <r_qp_glob>
   0.8604194

> <r_qp_QPpolrz>
    37.800

> <r_qp_QPlogPC16>
    10.760

> <r_qp_QPlogPoct>
    16.813

> <r_qp_QPlogPw>
     8.000

> <r_qp_QPlogPo/w>
     4.546

> <r_qp_QPlogS>
    -5.318

> <r_qp_CIQPlogS>
    -5.196

> <r_qp_QPlogHERG>
    -4.603

> <r_qp_QPPCaco>
  2628.344

> <r_qp_QPlogBB>
    -0.225

> <r_qp_QPPMDCK>
  1405.972

> <r_qp_QPlogKp>
    -1.655

> <r_qp_IP(eV)>
     8.396

> <r_qp_EA(eV)>
     0.510

> <i_qp_#metab>
0

> <r_qp_QPlogKhsa>
     0.794

> <i_qp_HumanOralAbsorption>
3

> <r_qp_PercentHumanOralAbsorption>
   100.000

> <r_qp_SAfluorine>
     0.000

> <r_qp_SAamideO>
     0.000

> <r_qp_PSA>
    55.509

> <i_qp_#NandO>
4

> <i_qp_RuleOfFive>
0

> <i_qp_RuleOfThree>
0

> <i_qp_#ringatoms>
21

> <i_qp_#in34>
0

> <i_qp_#in56>
21

> <i_qp_#noncon>
12

> <i_qp_#nonHatm>
25

> <r_qp_Jm>
0.0362451183809287

> <s_m_subgroupid>
100str_copy1

> <s_m_subgroup_title>
100str

> <b_m_subgroup_collapsed>
0

$$$$
ind_1,478540
                    3D
 Structure written by MMmdl.
 55 57  0  0  1  0            999 V2000
   -0.5344   -4.3784    3.1520 C   0  0  0  0  0  0
    0.4318   -3.5077    2.6358 C   0  0  0  0  0  0
    0.3738   -3.0094    1.3029 C   0  0  0  0  0  0
   -0.6892   -3.4109    0.4774 C   0  0  0  0  0  0
   -1.6506   -4.2810    0.9884 C   0  0  0  0  0  0
   -1.5721   -4.7515    2.2968 C   0  0  0  0  0  0
    1.5017   -2.1379    1.1338 C   0  0  0  0  0  0
    2.2539   -2.1813    2.3110 C   0  0  0  0  0  0
    1.5597   -2.9614    3.2097 N   0  0  0  0  0  0
    3.4514   -1.4659    2.6807 C   0  0  0  0  0  0
    4.1952   -1.0539    1.6373 N   0  0  0  0  0  0
    3.7502   -1.2726    3.8611 O   0  0  0  0  0  0
    5.4123   -0.2464    1.7164 C   0  0  0  0  0  0
    6.3051   -0.3769    0.4586 C   0  0  0  0  0  0
    7.5704    0.5021    0.5036 C   0  0  0  0  0  0
    7.2477    1.9694    0.8299 C   0  0  0  0  0  0
    6.4559    2.0865    2.1421 C   0  0  0  0  0  0
    5.1742    1.2308    2.1300 C   0  0  0  0  0  0
   -0.4860   -4.7516    4.1645 H   0  0  0  0  0  0
   -0.7663   -3.0493   -0.5375 H   0  0  0  0  0  0
   -2.4716   -4.5944    0.3602 H   0  0  0  0  0  0
   -2.3362   -5.4235    2.6594 H   0  0  0  0  0  0
    1.8894   -3.1028    4.1540 H   0  0  0  0  0  0
    3.8356   -1.2214    0.7084 H   0  0  0  0  0  0
    6.0191   -0.6765    2.5176 H   0  0  0  0  0  0
    6.5950   -1.4182    0.3086 H   0  0  0  0  0  0
    5.7269   -0.0805   -0.4181 H   0  0  0  0  0  0
    8.2572    0.1071    1.2540 H   0  0  0  0  0  0
    8.0970    0.4418   -0.4499 H   0  0  0  0  0  0
    8.1707    2.5460    0.9011 H   0  0  0  0  0  0
    6.6734    2.4103    0.0134 H   0  0  0  0  0  0
    7.0887    1.7749    2.9747 H   0  0  0  0  0  0
    6.2021    3.1307    2.3297 H   0  0  0  0  0  0
    4.4749    1.6840    1.4248 H   0  0  0  0  0  0
    4.7051    1.2795    3.1137 H   0  0  0  0  0  0
   -0.2079    2.3761    1.1715 C   0  0  0  0  0  0
   -0.5675    1.6189   -0.1224 C   0  0  0  0  0  0
   -2.0832    1.6797   -0.3856 C   0  0  0  0  0  0
   -0.0682    0.1517   -0.1197 C   0  0  0  0  0  0
    1.4627   -0.0524    0.0329 C   0  0  2  0  0  0
    2.2793    0.6105   -1.0889 C   0  0  0  0  0  0
    1.7958   -1.4431   -0.0118 O   0  0  0  0  0  0
   -0.6190    1.8798    2.0515 H   0  0  0  0  0  0
   -0.5982    3.3943    1.1540 H   0  0  0  0  0  0
    0.8707    2.4548    1.3071 H   0  0  0  0  0  0
   -0.0889    2.1412   -0.9514 H   0  0  0  0  0  0
   -2.6466    1.1818    0.4047 H   0  0  0  0  0  0
   -2.3405    1.1977   -1.3296 H   0  0  0  0  0  0
   -2.4343    2.7107   -0.4436 H   0  0  0  0  0  0
   -0.5786   -0.3752    0.6873 H   0  0  0  0  0  0
   -0.3917   -0.3390   -1.0391 H   0  0  0  0  0  0
    1.7965    0.3746    0.9807 H   0  0  0  0  0  0
    2.1732    1.6950   -1.0774 H   0  0  0  0  0  0
    1.9696    0.2521   -2.0713 H   0  0  0  0  0  0
    3.3418    0.3938   -0.9772 H   0  0  0  0  0  0
  1  2  2  0  0  0
  1  6  1  0  0  0
  1 19  1  0  0  0
  2  3  1  0  0  0
  2  9  1  0  0  0
  3  4  2  0  0  0
  3  7  1  0  0  0
  4  5  1  0  0  0
  4 20  1  0  0  0
  5  6  2  0  0  0
  5 21  1  0  0  0
  6 22  1  0  0  0
  7  8  2  0  0  0
  7 42  1  0  0  0
  8  9  1  0  0  0
  8 10  1  0  0  0
  9 23  1  0  0  0
 10 11  1  0  0  0
 10 12  2  0  0  0
 11 13  1  0  0  0
 11 24  1  0  0  0
 13 18  1  0  0  0
 13 14  1  0  0  0
 13 25  1  0  0  0
 14 15  1  0  0  0
 14 26  1  0  0  0
 14 27  1  0  0  0
 15 16  1  0  0  0
 15 28  1  0  0  0
 15 29  1  0  0  0
 16 17  1  0  0  0
 16 30  1  0  0  0
 16 31  1  0  0  0
 17 18  1  0  0  0
 17 32  1  0  0  0
 17 33  1  0  0  0
 18 34  1  0  0  0
 18 35  1  0  0  0
 36 37  1  0  0  0
 36 43  1  0  0  0
 36 44  1  0  0  0
 36 45  1  0  0  0
 37 38  1  0  0  0
 37 39  1  0  0  0
 37 46  1  0  0  0
 38 47  1  0  0  0
 38 48  1  0  0  0
 38 49  1  0  0  0
 39 40  1  0  0  0
 39 50  1  0  0  0
 39 51  1  0  0  0
 40 41  1  0  0  0
 40 42  1  0  0  0
 40 52  1  0  0  0
 41 53  1  0  0  0
 41 54  1  0  0  0
 41 55  1  0  0  0
M  END
> <s_m_entry_id>
8113

> <s_m_entry_name>
entry

> <i_f3d_flags>
0

> <s_m_job_name>
adme_1000

> <r_psp_Prime_Energy>
-34130.8144831863

> <r_psp_Prime_Solv_GB>
-5188.32821052292

> <r_psp_Prime_Coulomb>
-26482.4774832716

> <r_psp_Prime_vdW>
-4053.86554418645

> <r_psp_Prime_Covalent>
4418.46883704022

> <i_psp_model_num>
0

> <r_psp_Prime_Lipo>
-2178.15471530338

> <s_psp_Prime_Energy_Force_Field>
S-OPLS

> <s_psp_Prime_Energy_Solvent_Model>
VSGB2.1

> <r_psp_Prime_Hbond>
-550.204832954616

> <r_psp_Prime_Packing>
-55.8446424272089

> <r_psp_Prime_SelfCont>
-40.4078915603482

> <r_psp_Memb1_x>
103.457542316003

> <r_psp_Memb1_y>
39.4731108300965

> <r_psp_Memb1_z>
48.7987221124676

> <r_psp_Memb2_x>
99.8134167309003

> <r_psp_Memb2_y>
2.81176945184187

> <r_psp_Memb2_z>
23.8404289603493

> <r_psp_MembDummyRadius>
4.45

> <r_psp_Prime_Bond_Covalent>
466.936108212311

> <r_psp_Prime_Bond_SGB>
49964.8774033113

> <r_psp_Prime_Angle_Covalent>
2224.27676897723

> <r_psp_Prime_Angle_SGB>
-21655.5304999608

> <r_psp_Prime_Torsion_Covalent>
1727.25595985068

> <r_psp_Prime_NB14_LJ>
4240.44630700062

> <r_psp_Prime_NB14_Lipo>
0

> <r_psp_Prime_NB14_Elec>
25524.8592170822

> <r_psp_Prime_NB14_SGB>
-15609.7871789287

> <r_psp_Prime_NBShort_LJ>
-7879.12145597424

> <r_psp_Prime_NBShort_Lipo>
-2178.15471530338

> <r_psp_Prime_NBShort_Elec>
-53024.4356405205

> <r_psp_Prime_NBShort_SGB>
18011.4736400293

> <r_psp_Prime_NBLong_LJ>
-415.190395212836

> <r_psp_Prime_NBLong_Lipo>
0

> <r_psp_Prime_NBLong_Elec>
1017.09894016671

> <r_psp_Prime_NBLong_SGB>
-1164.04676420365

> <r_psp_Prime_Self_SGB>
-34735.3148107704

> <s_m_Source_Path>
F:\Dekstop_files\DAC4,5\Molecular Systems Desgn and Engineering\supplementary_str

> <s_m_Source_File>
1000_str.mae

> <i_m_Source_File_Index>
920

> <i_lp_mmshare_version>
53156

> <s_epik_input>
W2NIXTFbY0hdW2NIXVtjSF1jKGMxMiljKE9bQ0BASF0oW0NIM10pW0NIMl1bQ0hdKFtDSDNdKVtDSDNdKWMoW25IXTIpQyg9TylbTkhdW0NIXTNbQ0gyXVtDSDJdW0NIMl1bQ0gyXVtDSDJdMw==

> <s_epik_cmdline>
J2VwaWtfcHl0aG9uJywgJy1waHQnLCAnMC4wJywgJy1waCcsICc3LjAnLCAnLXRuJywgJzgnLCAnLW1hJywgJzUwMCcsICctaW1hZScsICc8aW5maWxlLm1hZT4nLCAnLW9tYWUnLCAnPG91dGZpbGUubWFlPic=

> <r_lp_tautomer_probability>
1

> <r_epik_Ionization_Penalty>
  0.0000

> <r_epik_Ionization_Penalty_Charging>
  0.0000

> <r_epik_Ionization_Penalty_Neutral>
  0.0000

> <r_epik_State_Penalty>
  0.0000

> <r_epik_Charging_Adjusted_Penalty>
0

> <i_epik_Tot_Q>
0

> <i_epik_Tot_abs_Q>
0

> <s_lp_Force_Field>
S-OPLS

> <r_lp_Energy>
31.9886

> <b_lp_Chiralities_Consistent>
1

> <s_lp_Variant>
ind_1,478540-1

> <s_i_glide_gridfile>
glide-grid_mmpl3

> <i_i_glide_lignum>
1937

> <i_i_glide_rotatable_bonds>
7

> <r_i_docking_score>
-8.16555972171764

> <r_i_glide_ligand_efficiency>
-0.326622388868706

> <r_i_glide_ligand_efficiency_sa>
-0.955049657724827

> <r_i_glide_ligand_efficiency_ln>
-1.93548235612569

> <r_i_glide_gscore>
-8.16555972171764

> <r_i_glide_evdw>
-39.7341156005859

> <r_i_glide_ecoul>
-1.08070719242096

> <r_i_glide_energy>
-40.8148227930069

> <r_i_glide_einternal>
10.4325981140137

> <r_i_glide_emodel>
-54.8363670236441

> <i_i_glide_confnum>
39

> <i_i_glide_posenum>
142

> <r_i_glide_eff_state_penalty>
0

> <i_rge_num_r_groups>
1

> <r_rge_occupation_R1>
1

> <s_rge_R1>
478540

> <s_rge_R1_s_m_title>
478540

> <s_rge_R1_s_m_entry_id>
17596

> <s_rge_R1_s_m_entry_name>
eMol_BB_r-groups.829

> <s_rge_R1_s_m_smiles>
[*]O[C@@H](C)CC(C)C

> <b_rge_R1_b_sd_chiral_flag>
0

> <i_rge_R1_i_sd_version>
0

> <s_rge_R1_s_m_Source_File>
eMol_BB_r-groups-dedup.mae

> <i_rge_R1_i_m_Source_File_Index>
684

> <s_rge_R1_s_m_Source_Path>
/Users/konze/projects/pathfinder/r-groups

> <s_rge_R1_s_sd_Source_Path>
/Users/konze/projects/pathfinder/reactant sets/eMolecules

> <s_rge_R1_s_sd_Source_File>
eMol BB r-groups.mae

> <i_rge_R1_i_sd_Source_File_Index>
829

> <r_rge_R1_r_sd_MW>
102.1748

> <i_rge_R1_i_sd_RB>
2

> <i_rge_R1_i_sd_HeavyAtomCount>
7

> <i_rge_R1_i_sd_HBA>
1

> <i_rge_R1_i_sd_HBD>
1

> <r_rge_R1_r_sd_PSA>
20.23

> <i_rge_R1_i_sd_ChiralCenterCount>
0

> <i_rge_R1_i_sd_ChiralCenterCountAllPossible>
1

> <i_rge_R1_i_sd_RingCount>
0

> <r_rge_R1_r_sd_AlogP>
1.6

> <s_rge_R1_s_sd_subgroup_title>
eMol BB r-groups

> <s_rge_R1_s_sd_subgroupid>
eMol BB r-groups

> <i_rge_R1_i_sd_subgroup_collapsed>
0

> <s_rge_R1_s_sd_Unique_SMILES_Stereo>
CC(C)C[C@H](C)O

> <i_rge_R1_i_sd_canvasUID>
770

> <s_rge_R1_s_canvas_Unique_SMILES_Stereo>
CC(C)C[C@H](C)O

> <s_psp_Prime_MMGBSA_Input_Structure_Hash>
bab7d29120f6d9a96e0ea7427349d6aff5a037ea56c242f879d144d1

> <i_psp_number_heavy_atoms>
25

> <r_psp_MMGBSA_dG_Bind>
-43.0642244612463

> <r_psp_MMGBSA_dG_Bind_Coulomb>
-5.25182627190952

> <r_psp_MMGBSA_dG_Bind_Covalent>
2.24404809189491

> <r_psp_MMGBSA_dG_Bind_Hbond>
-0.107227871435043

> <r_psp_MMGBSA_dG_Bind_Lipo>
-25.83853425701

> <r_psp_MMGBSA_dG_Bind_Packing>
4.9737991503207e-014

> <r_psp_MMGBSA_dG_Bind_SelfCont>
7.105427357601e-015

> <r_psp_MMGBSA_dG_Bind_Solv_GB>
28.0490527748561

> <r_psp_MMGBSA_dG_Bind_vdW>
-42.1597369275601

> <r_psp_Lig_Strain_Energy>
6.72720892444383

> <r_psp_Lig_Strain_Coulomb>
0.604817395426174

> <r_psp_Lig_Strain_Covalent>
2.24424896000847

> <r_psp_Lig_Strain_Hbond>
0

> <r_psp_Lig_Strain_Lipo>
0.0481760266903744

> <r_psp_Lig_Strain_Packing>
0

> <r_psp_Lig_Strain_SelfCont>
0

> <r_psp_Lig_Strain_Solv_GB>
0.034259715746586

> <r_psp_Lig_Strain_vdW>
3.79570682657223

> <r_psp_Ligand_Energy>
7.50078200874098

> <r_psp_Ligand_Coulomb>
-18.3098430566943

> <r_psp_Ligand_Covalent>
25.8182631269179

> <r_psp_Ligand_Hbond>
0

> <r_psp_Ligand_Lipo>
-1.79154870889379

> <r_psp_Ligand_Packing>
0

> <r_psp_Ligand_SelfCont>
0

> <r_psp_Ligand_Solv_GB>
-9.82548293518883

> <r_psp_Ligand_vdW>
11.6093935826

> <r_psp_Complex_Energy>
-34130.8144831863

> <r_psp_Complex_Coulomb>
-26482.4774832716

> <r_psp_Complex_Covalent>
4418.46883704022

> <r_psp_Complex_Hbond>
-550.204832954616

> <r_psp_Complex_Lipo>
-2178.15471530338

> <r_psp_Complex_Packing>
-55.8446424272089

> <r_psp_Complex_SelfCont>
-40.4078915603482

> <r_psp_Complex_Solv_GB>
-5188.32821052292

> <r_psp_Complex_vdW>
-4053.86554418645

> <r_psp_Receptor_Energy>
-34095.2510407338

> <r_psp_Receptor_Coulomb>
-26458.915813943

> <r_psp_Receptor_Covalent>
4390.40652582141

> <r_psp_Receptor_Hbond>
-550.097605083181

> <r_psp_Receptor_Lipo>
-2150.52463233748

> <r_psp_Receptor_Packing>
-55.8446424272089

> <r_psp_Receptor_SelfCont>
-40.4078915603482

> <r_psp_Receptor_Solv_GB>
-5206.55178036259

> <r_psp_Receptor_vdW>
-4023.31520084149

> <r_psp_MMGBSA_dG_Bind(NS)>
-49.7914333856388

> <r_psp_MMGBSA_dG_Bind(NS)_Coulomb>
-5.85664366737547

> <r_psp_MMGBSA_dG_Bind(NS)_Covalent>
-0.000200868112187891

> <r_psp_MMGBSA_dG_Bind(NS)_Hbond>
-0.107227871434816

> <r_psp_MMGBSA_dG_Bind(NS)_Lipo>
-25.8867102836957

> <r_psp_MMGBSA_dG_Bind(NS)_Packing>
0

> <r_psp_MMGBSA_dG_Bind(NS)_SelfCont>
0

> <r_psp_MMGBSA_dG_Bind(NS)_Solv_GB>
28.0147930591111

> <r_psp_MMGBSA_dG_Bind(NS)_vdW>
-45.9554437541369

> <r_psp_Rec_Strain_Energy>
-5.0931703299284e-011

> <r_psp_Rec_Strain_Coulomb>
4.00177668780088e-011

> <r_psp_Rec_Strain_Covalent>
-9.09494701772928e-013

> <r_psp_Rec_Strain_Hbond>
-2.27373675443232e-013

> <r_psp_Rec_Strain_Lipo>
-5.00222085975111e-012

> <r_psp_Rec_Strain_Packing>
4.9737991503207e-014

> <r_psp_Rec_Strain_SelfCont>
7.105427357601e-015

> <r_psp_Rec_Strain_Solv_GB>
-1.81898940354586e-012

> <r_psp_Rec_Strain_vdW>
4.54747350886464e-012

> <r_psp_Prime_MMGBSA_ligand_efficiency>
-1.72256897844985

> <r_psp_Prime_MMGBSA_ligand_efficiency_sa>
-2.58385346767478

> <r_psp_Prime_MMGBSA_ligand_efficiency_ln>
-10.2075117279831

> <r_i_glide_lipo>
-5.13488106882736

> <r_i_glide_hbond>
0

> <r_i_glide_metal>
0

> <r_i_glide_rewards>
-1.85192880540058

> <r_i_glide_erotb>
0.970062011402747

> <r_i_glide_esite>
0

> <i_psp_ExecuteFunction_Internal_Entry_Index>
1645

> <s_rge_R1_s_st_Chirality_1>
5_S_7_4_6_17

> <i_qp_#stars>
0

> <i_qp_#amine>
0

> <i_qp_#amidine>
0

> <i_qp_#acid>
0

> <i_qp_#amide>
0

> <i_qp_#rotor>
6

> <i_qp_#rtvFG>
0

> <i_qp_CNS>
0

> <r_qp_mol_MW>
   342.480

> <r_qp_dipole>
     2.442

> <r_qp_SASA>
   637.860

> <r_qp_FOSA>
   409.086

> <r_qp_FISA>
    60.448

> <r_qp_PISA>
   168.326

> <r_qp_WPSA>
     0.000

> <r_qp_volume>
  1175.326

> <r_qp_donorHB>
     2.000

> <r_qp_accptHB>
     3.250

> <r_qp_dip^2/V>
   0.0050746

> <r_qp_ACxDN^.5/SA>
   0.0072056

> <r_qp_glob>
   0.8443944

> <r_qp_QPpolrz>
    38.637

> <r_qp_QPlogPC16>
    11.209

> <r_qp_QPlogPoct>
    16.989

> <r_qp_QPlogPw>
     7.617

> <r_qp_QPlogPo/w>
     4.879

> <r_qp_QPlogS>
    -5.543

> <r_qp_CIQPlogS>
    -5.266

> <r_qp_QPlogHERG>
    -4.853

> <r_qp_QPPCaco>
  2646.515

> <r_qp_QPlogBB>
    -0.363

> <r_qp_QPPMDCK>
  1416.482

> <r_qp_QPlogKp>
    -1.465

> <r_qp_IP(eV)>
     8.387

> <r_qp_EA(eV)>
     0.504

> <i_qp_#metab>
1

> <r_qp_QPlogKhsa>
     0.849

> <i_qp_HumanOralAbsorption>
3

> <r_qp_PercentHumanOralAbsorption>
   100.000

> <r_qp_SAfluorine>
     0.000

> <r_qp_SAamideO>
     0.000

> <r_qp_PSA>
    55.196

> <i_qp_#NandO>
4

> <i_qp_RuleOfFive>
0

> <i_qp_RuleOfThree>
0

> <i_qp_#ringatoms>
15

> <i_qp_#in34>
0

> <i_qp_#in56>
15

> <i_qp_#noncon>
6

> <i_qp_#nonHatm>
25

> <r_qp_Jm>
0.0336420946200148

> <s_m_subgroupid>
100str_copy1

> <s_m_subgroup_title>
100str

> <b_m_subgroup_collapsed>
0

$$$$
ind_1,480335
                    3D
 Structure written by MMmdl.
 55 57  0  0  1  0            999 V2000
    3.1639   -4.5132    1.6781 C   0  0  0  0  0  0
    2.7580   -3.5135    0.7869 C   0  0  0  0  0  0
    2.2730   -2.2471    1.2242 C   0  0  0  0  0  0
    2.2363   -1.9881    2.6056 C   0  0  0  0  0  0
    2.6420   -2.9805    3.4958 C   0  0  0  0  0  0
    3.0901   -4.2165    3.0389 C   0  0  0  0  0  0
    1.9266   -1.5010    0.0414 C   0  0  0  0  0  0
    2.2749   -2.2775   -1.0653 C   0  0  0  0  0  0
    2.7461   -3.4843   -0.5892 N   0  0  0  0  0  0
    2.2453   -1.9173   -2.4669 C   0  0  0  0  0  0
    2.3824   -2.9474   -3.3266 N   0  0  0  0  0  0
    2.0907   -0.7483   -2.8235 O   0  0  0  0  0  0
    2.4019   -2.8472   -4.7876 C   0  0  0  0  0  0
    3.6382   -2.1191   -5.3807 C   0  0  0  0  0  0
    3.6516   -2.0772   -6.9214 C   0  0  0  0  0  0
    3.4394   -3.4653   -7.5462 C   0  0  0  0  0  0
    2.1470   -4.1166   -7.0284 C   0  0  0  0  0  0
    2.1076   -4.1954   -5.4894 C   0  0  0  0  0  0
    3.5289   -5.4709    1.3369 H   0  0  0  0  0  0
    1.9021   -1.0343    2.9828 H   0  0  0  0  0  0
    2.6105   -2.7866    4.5581 H   0  0  0  0  0  0
    3.3979   -4.9617    3.7579 H   0  0  0  0  0  0
    3.0608   -4.2156   -1.2098 H   0  0  0  0  0  0
    2.5716   -3.8632   -2.9477 H   0  0  0  0  0  0
    1.5496   -2.2176   -5.0564 H   0  0  0  0  0  0
    3.7011   -1.0989   -5.0002 H   0  0  0  0  0  0
    4.5415   -2.6346   -5.0510 H   0  0  0  0  0  0
    2.8684   -1.4017   -7.2693 H   0  0  0  0  0  0
    4.5931   -1.6528   -7.2720 H   0  0  0  0  0  0
    3.4037   -3.3821   -8.6331 H   0  0  0  0  0  0
    4.2922   -4.1060   -7.3164 H   0  0  0  0  0  0
    1.2882   -3.5441   -7.3825 H   0  0  0  0  0  0
    2.0398   -5.1155   -7.4529 H   0  0  0  0  0  0
    2.8548   -4.9264   -5.1755 H   0  0  0  0  0  0
    1.1364   -4.5804   -5.1745 H   0  0  0  0  0  0
   -0.4962   -0.3845    1.5296 C   0  0  0  0  0  0
    0.0008   -0.0282    0.1047 C   0  0  0  0  0  0
   -0.7857   -0.9224   -0.8960 C   0  0  0  0  0  0
    1.4303   -0.2186    0.0068 O   0  0  0  0  0  0
   -0.2415    1.4913   -0.2029 C   0  0  0  0  0  0
    0.1896    1.9129   -1.6272 C   0  0  0  0  0  0
    0.4086    2.4465    0.8257 C   0  0  0  0  0  0
   -1.5355   -0.0869    1.6738 H   0  0  0  0  0  0
    0.0920    0.1095    2.3013 H   0  0  0  0  0  0
   -0.4397   -1.4556    1.7243 H   0  0  0  0  0  0
   -1.8488   -0.6789   -0.8953 H   0  0  0  0  0  0
   -0.6980   -1.9816   -0.6516 H   0  0  0  0  0  0
   -0.4303   -0.8111   -1.9185 H   0  0  0  0  0  0
   -1.3172    1.6671   -0.1444 H   0  0  0  0  0  0
    1.2562    1.7512   -1.7875 H   0  0  0  0  0  0
   -0.0088    2.9710   -1.8022 H   0  0  0  0  0  0
   -0.3502    1.3678   -2.4004 H   0  0  0  0  0  0
    1.4881    2.3015    0.8824 H   0  0  0  0  0  0
    0.0006    2.3111    1.8268 H   0  0  0  0  0  0
    0.2328    3.4900    0.5624 H   0  0  0  0  0  0
  1  2  2  0  0  0
  1  6  1  0  0  0
  1 19  1  0  0  0
  2  3  1  0  0  0
  2  9  1  0  0  0
  3  4  2  0  0  0
  3  7  1  0  0  0
  4  5  1  0  0  0
  4 20  1  0  0  0
  5  6  2  0  0  0
  5 21  1  0  0  0
  6 22  1  0  0  0
  7  8  2  0  0  0
  7 39  1  0  0  0
  8  9  1  0  0  0
  8 10  1  0  0  0
  9 23  1  0  0  0
 10 11  1  0  0  0
 10 12  2  0  0  0
 11 13  1  0  0  0
 11 24  1  0  0  0
 13 18  1  0  0  0
 13 14  1  0  0  0
 13 25  1  0  0  0
 14 15  1  0  0  0
 14 26  1  0  0  0
 14 27  1  0  0  0
 15 16  1  0  0  0
 15 28  1  0  0  0
 15 29  1  0  0  0
 16 17  1  0  0  0
 16 30  1  0  0  0
 16 31  1  0  0  0
 17 18  1  0  0  0
 17 32  1  0  0  0
 17 33  1  0  0  0
 18 34  1  0  0  0
 18 35  1  0  0  0
 36 37  1  0  0  0
 36 43  1  0  0  0
 36 44  1  0  0  0
 36 45  1  0  0  0
 37 38  1  0  0  0
 37 39  1  0  0  0
 37 40  1  0  0  0
 38 46  1  0  0  0
 38 47  1  0  0  0
 38 48  1  0  0  0
 40 41  1  0  0  0
 40 42  1  0  0  0
 40 49  1  0  0  0
 41 50  1  0  0  0
 41 51  1  0  0  0
 41 52  1  0  0  0
 42 53  1  0  0  0
 42 54  1  0  0  0
 42 55  1  0  0  0
M  END
> <s_m_entry_id>
8172

> <s_m_entry_name>
entry

> <i_f3d_flags>
0

> <s_m_job_name>
adme_1000

> <r_psp_Prime_Energy>
-34129.3090415719

> <r_psp_Prime_Solv_GB>
-5187.03181208957

> <r_psp_Prime_Coulomb>
-26486.7298333016

> <r_psp_Prime_vdW>
-4053.54926538148

> <r_psp_Prime_Covalent>
4421.97775467528

> <i_psp_model_num>
0

> <r_psp_Prime_Lipo>
-2177.60509263538

> <s_psp_Prime_Energy_Force_Field>
S-OPLS

> <s_psp_Prime_Energy_Solvent_Model>
VSGB2.1

> <r_psp_Prime_Hbond>
-550.118258851598

> <r_psp_Prime_Packing>
-55.8446424272089

> <r_psp_Prime_SelfCont>
-40.4078915603482

> <r_psp_Memb1_x>
103.457542316003

> <r_psp_Memb1_y>
39.4731108300965

> <r_psp_Memb1_z>
48.7987221124676

> <r_psp_Memb2_x>
99.8134167309003

> <r_psp_Memb2_y>
2.81176945184187

> <r_psp_Memb2_z>
23.8404289603493

> <r_psp_MembDummyRadius>
4.45

> <r_psp_Prime_Bond_Covalent>
467.038168230686

> <r_psp_Prime_Bond_SGB>
49970.0752034957

> <r_psp_Prime_Angle_Covalent>
2225.37120230444

> <r_psp_Prime_Angle_SGB>
-21658.3465863859

> <r_psp_Prime_Torsion_Covalent>
1729.56838414016

> <r_psp_Prime_NB14_LJ>
4242.2782623982

> <r_psp_Prime_NB14_Lipo>
0

> <r_psp_Prime_NB14_Elec>
25558.9049240494

> <r_psp_Prime_NB14_SGB>
-15618.9187085166

> <r_psp_Prime_NBShort_LJ>
-7880.87425501209

> <r_psp_Prime_NBShort_Lipo>
-2177.60509263538

> <r_psp_Prime_NBShort_Elec>
-53063.8329978528

> <r_psp_Prime_NBShort_SGB>
18021.3186592466

> <r_psp_Prime_NBLong_LJ>
-414.953272767592

> <r_psp_Prime_NBLong_Lipo>
0

> <r_psp_Prime_NBLong_Elec>
1018.19824050184

> <r_psp_Prime_NBLong_SGB>
-1163.71606341684

> <r_psp_Prime_Self_SGB>
-34737.4443165125

> <s_m_Source_Path>
F:\Dekstop_files\DAC4,5\Molecular Systems Desgn and Engineering\supplementary_str

> <s_m_Source_File>
1000_str.mae

> <i_m_Source_File_Index>
963

> <i_lp_mmshare_version>
53156

> <s_epik_input>
W2NIXTFbY0hdW2NIXVtjSF1jKGMxMiljKE9DKFtDSDNdKShbQ0gzXSlbQ0hdKFtDSDNdKVtDSDNdKWMoW25IXTIpQyg9TylbTkhdW0NIXTNbQ0gyXVtDSDJdW0NIMl1bQ0gyXVtDSDJdMw==

> <s_epik_cmdline>
J2VwaWtfcHl0aG9uJywgJy1waHQnLCAnMC4wJywgJy1waCcsICc3LjAnLCAnLXRuJywgJzgnLCAnLW1hJywgJzUwMCcsICctaW1hZScsICc8aW5maWxlLm1hZT4nLCAnLW9tYWUnLCAnPG91dGZpbGUubWFlPic=

> <r_lp_tautomer_probability>
1

> <r_epik_Ionization_Penalty>
  0.0000

> <r_epik_Ionization_Penalty_Charging>
  0.0000

> <r_epik_Ionization_Penalty_Neutral>
  0.0000

> <r_epik_State_Penalty>
  0.0000

> <r_epik_Charging_Adjusted_Penalty>
0

> <i_epik_Tot_Q>
0

> <i_epik_Tot_abs_Q>
0

> <s_lp_Force_Field>
S-OPLS

> <r_lp_Energy>
38.46349

> <b_lp_Chiralities_Consistent>
1

> <s_lp_Variant>
ind_1,480335-1

> <s_i_glide_gridfile>
glide-grid_mmpl3

> <i_i_glide_lignum>
1944

> <i_i_glide_rotatable_bonds>
6

> <r_i_docking_score>
-8.1981915541347

> <r_i_glide_ligand_efficiency>
-0.327927662165388

> <r_i_glide_ligand_efficiency_sa>
-0.958866299993447

> <r_i_glide_ligand_efficiency_ln>
-1.94321707830564

> <r_i_glide_gscore>
-8.1981915541347

> <r_i_glide_evdw>
-36.8672752380371

> <r_i_glide_ecoul>
-1.14347362518311

> <r_i_glide_energy>
-38.0107488632202

> <r_i_glide_einternal>
6.73044490814209

> <r_i_glide_emodel>
-52.2991008132023

> <i_i_glide_confnum>
119

> <i_i_glide_posenum>
333

> <r_i_glide_eff_state_penalty>
0

> <i_rge_num_r_groups>
1

> <r_rge_occupation_R1>
1

> <s_rge_R1>
480335

> <s_rge_R1_s_m_title>
480335

> <s_rge_R1_s_m_entry_id>
17601

> <s_rge_R1_s_m_entry_name>
eMol_BB_r-groups.831

> <s_rge_R1_s_m_smiles>
[*]OC(C)(C)C(C)C

> <b_rge_R1_b_sd_chiral_flag>
0

> <i_rge_R1_i_sd_version>
0

> <s_rge_R1_s_m_Source_File>
eMol_BB_r-groups-dedup.mae

> <i_rge_R1_i_m_Source_File_Index>
686

> <s_rge_R1_s_m_Source_Path>
/Users/konze/projects/pathfinder/r-groups

> <s_rge_R1_s_sd_Source_Path>
/Users/konze/projects/pathfinder/reactant sets/eMolecules

> <s_rge_R1_s_sd_Source_File>
eMol BB r-groups.mae

> <i_rge_R1_i_sd_Source_File_Index>
831

> <r_rge_R1_r_sd_MW>
102.1748

> <i_rge_R1_i_sd_RB>
1

> <i_rge_R1_i_sd_HeavyAtomCount>
7

> <i_rge_R1_i_sd_HBA>
1

> <i_rge_R1_i_sd_HBD>
1

> <r_rge_R1_r_sd_PSA>
20.23

> <i_rge_R1_i_sd_ChiralCenterCount>
0

> <i_rge_R1_i_sd_ChiralCenterCountAllPossible>
0

> <i_rge_R1_i_sd_RingCount>
0

> <r_rge_R1_r_sd_AlogP>
1.4163

> <s_rge_R1_s_sd_subgroup_title>
eMol BB r-groups

> <s_rge_R1_s_sd_subgroupid>
eMol BB r-groups

> <i_rge_R1_i_sd_subgroup_collapsed>
0

> <s_rge_R1_s_sd_Unique_SMILES_Stereo>
CC(C)(O)C(C)C

> <i_rge_R1_i_sd_canvasUID>
772

> <s_rge_R1_s_canvas_Unique_SMILES_Stereo>
CC(C)(O)C(C)C

> <s_psp_Prime_MMGBSA_Input_Structure_Hash>
2987234eabb0d74ea86a6137bd38b6b52e0ad2b2c0598ceb276e6b78

> <i_psp_number_heavy_atoms>
25

> <r_psp_MMGBSA_dG_Bind>
-45.381360269399

> <r_psp_MMGBSA_dG_Bind_Coulomb>
-6.17720389803071

> <r_psp_MMGBSA_dG_Bind_Covalent>
2.18812258879916

> <r_psp_MMGBSA_dG_Bind_Hbond>
-0.0206537684168779

> <r_psp_MMGBSA_dG_Bind_Lipo>
-25.1410091662801

> <r_psp_MMGBSA_dG_Bind_Packing>
4.9737991503207e-014

> <r_psp_MMGBSA_dG_Bind_SelfCont>
7.105427357601e-015

> <r_psp_MMGBSA_dG_Bind_Solv_GB>
27.8505601158877

> <r_psp_MMGBSA_dG_Bind_vdW>
-44.0811761412656

> <r_psp_Lig_Strain_Energy>
3.83281419131083

> <r_psp_Lig_Strain_Coulomb>
-0.533882255396005

> <r_psp_Lig_Strain_Covalent>
2.18832345691203

> <r_psp_Lig_Strain_Hbond>
0

> <r_psp_Lig_Strain_Lipo>
-0.00956581216064123

> <r_psp_Lig_Strain_Packing>
0

> <r_psp_Lig_Strain_SelfCont>
0

> <r_psp_Lig_Strain_Solv_GB>
0.067669285956157

> <r_psp_Lig_Strain_vdW>
2.1202695159993

> <r_psp_Ligand_Energy>
11.3233594313137

> <r_psp_Ligand_Coulomb>
-21.6368154605432

> <r_psp_Ligand_Covalent>
29.3831062650741

> <r_psp_Ligand_Hbond>
0

> <r_psp_Ligand_Lipo>
-1.93945113162167

> <r_psp_Ligand_Packing>
0

> <r_psp_Ligand_SelfCont>
0

> <r_psp_Ligand_Solv_GB>
-8.33059184286924

> <r_psp_Ligand_vdW>
13.8471116012737

> <r_psp_Complex_Energy>
-34129.3090415719

> <r_psp_Complex_Coulomb>
-26486.7298333016

> <r_psp_Complex_Covalent>
4421.97775467528

> <r_psp_Complex_Hbond>
-550.118258851598

> <r_psp_Complex_Lipo>
-2177.60509263538

> <r_psp_Complex_Packing>
-55.8446424272089

> <r_psp_Complex_SelfCont>
-40.4078915603482

> <r_psp_Complex_Solv_GB>
-5187.03181208957

> <r_psp_Complex_vdW>
-4053.54926538148

> <r_psp_Receptor_Energy>
-34095.2510407338

> <r_psp_Receptor_Coulomb>
-26458.915813943

> <r_psp_Receptor_Covalent>
4390.40652582141

> <r_psp_Receptor_Hbond>
-550.097605083181

> <r_psp_Receptor_Lipo>
-2150.52463233748

> <r_psp_Receptor_Packing>
-55.8446424272089

> <r_psp_Receptor_SelfCont>
-40.4078915603482

> <r_psp_Receptor_Solv_GB>
-5206.55178036259

> <r_psp_Receptor_vdW>
-4023.31520084149

> <r_psp_MMGBSA_dG_Bind(NS)>
-49.2141744606561

> <r_psp_MMGBSA_dG_Bind(NS)_Coulomb>
-5.64332164267762

> <r_psp_MMGBSA_dG_Bind(NS)_Covalent>
-0.000200868112187891

> <r_psp_MMGBSA_dG_Bind(NS)_Hbond>
-0.0206537684166506

> <r_psp_MMGBSA_dG_Bind(NS)_Lipo>
-25.1314433541147

> <r_psp_MMGBSA_dG_Bind(NS)_Packing>
0

> <r_psp_MMGBSA_dG_Bind(NS)_SelfCont>
0

> <r_psp_MMGBSA_dG_Bind(NS)_Solv_GB>
27.7828908299334

> <r_psp_MMGBSA_dG_Bind(NS)_vdW>
-46.2014456572692

> <r_psp_Rec_Strain_Energy>
-5.0931703299284e-011

> <r_psp_Rec_Strain_Coulomb>
4.00177668780088e-011

> <r_psp_Rec_Strain_Covalent>
-9.09494701772928e-013

> <r_psp_Rec_Strain_Hbond>
-2.27373675443232e-013

> <r_psp_Rec_Strain_Lipo>
-5.00222085975111e-012

> <r_psp_Rec_Strain_Packing>
4.9737991503207e-014

> <r_psp_Rec_Strain_SelfCont>
7.105427357601e-015

> <r_psp_Rec_Strain_Solv_GB>
-1.81898940354586e-012

> <r_psp_Rec_Strain_vdW>
4.54747350886464e-012

> <r_psp_Prime_MMGBSA_ligand_efficiency>
-1.81525441077596

> <r_psp_Prime_MMGBSA_ligand_efficiency_sa>
-2.72288161616394

> <r_psp_Prime_MMGBSA_ligand_efficiency_ln>
-10.756742353472

> <r_i_glide_lipo>
-5.00800404354611

> <r_i_glide_hbond>
0

> <r_i_glide_metal>
0

> <r_i_glide_rewards>
-1.98368771441156

> <r_i_glide_erotb>
0.808385009502289

> <r_i_glide_esite>
0

> <i_psp_ExecuteFunction_Internal_Entry_Index>
1591

> <i_qp_#stars>
0

> <i_qp_#amine>
0

> <i_qp_#amidine>
0

> <i_qp_#acid>
0

> <i_qp_#amide>
0

> <i_qp_#rotor>
5

> <i_qp_#rtvFG>
0

> <i_qp_CNS>
0

> <r_qp_mol_MW>
   342.480

> <r_qp_dipole>
     6.797

> <r_qp_SASA>
   660.081

> <r_qp_FOSA>
   462.044

> <r_qp_FISA>
    35.453

> <r_qp_PISA>
   162.585

> <r_qp_WPSA>
     0.000

> <r_qp_volume>
  1183.834

> <r_qp_donorHB>
     2.000

> <r_qp_accptHB>
     3.250

> <r_qp_dip^2/V>
   0.0390248

> <r_qp_ACxDN^.5/SA>
   0.0069631

> <r_qp_glob>
   0.8199016

> <r_qp_QPpolrz>
    39.565

> <r_qp_QPlogPC16>
    11.066

> <r_qp_QPlogPoct>
    17.587

> <r_qp_QPlogPw>
     7.682

> <r_qp_QPlogPo/w>
     5.090

> <r_qp_QPlogS>
    -6.103

> <r_qp_CIQPlogS>
    -5.266

> <r_qp_QPlogHERG>
    -5.222

> <r_qp_QPPCaco>
  4567.728

> <r_qp_QPlogBB>
    -0.089

> <r_qp_QPPMDCK>
  2555.100

> <r_qp_QPlogKp>
    -1.120

> <r_qp_IP(eV)>
     8.355

> <r_qp_EA(eV)>
     0.439

> <i_qp_#metab>
1

> <r_qp_QPlogKhsa>
     0.905

> <i_qp_HumanOralAbsorption>
3

> <r_qp_PercentHumanOralAbsorption>
   100.000

> <r_qp_SAfluorine>
     0.000

> <r_qp_SAamideO>
     0.000

> <r_qp_PSA>
    53.614

> <i_qp_#NandO>
4

> <i_qp_RuleOfFive>
1

> <i_qp_RuleOfThree>
1

> <i_qp_#ringatoms>
15

> <i_qp_#in34>
0

> <i_qp_#in56>
15

> <i_qp_#noncon>
6

> <i_qp_#nonHatm>
25

> <r_qp_Jm>
0.0204955042860468

> <s_m_subgroupid>
100str_copy1

> <s_m_subgroup_title>
100str

> <b_m_subgroup_collapsed>
0

$$$$
ind_1,480335
                    3D
 Structure written by MMmdl.
 55 57  0  0  1  0            999 V2000
   -1.9984    4.4248    1.7262 C   0  0  0  0  0  0
   -1.5653    3.4611    0.8087 C   0  0  0  0  0  0
   -0.9527    2.2404    1.2081 C   0  0  0  0  0  0
   -0.7806    2.0007    2.5832 C   0  0  0  0  0  0
   -1.2080    2.9583    3.5011 C   0  0  0  0  0  0
   -1.8034    4.1432    3.0781 C   0  0  0  0  0  0
   -0.6371    1.4925    0.0155 C   0  0  0  0  0  0
   -1.0526    2.2808   -1.0674 C   0  0  0  0  0  0
   -1.6156    3.4353   -0.5633 N   0  0  0  0  0  0
   -1.0182    1.9768   -2.4846 C   0  0  0  0  0  0
   -1.1163    3.0487   -3.2976 N   0  0  0  0  0  0
   -0.9100    0.8211   -2.8960 O   0  0  0  0  0  0
   -1.0738    3.0205   -4.7610 C   0  0  0  0  0  0
   -1.6835    4.2891   -5.4063 C   0  0  0  0  0  0
   -1.6173    4.2965   -6.9466 C   0  0  0  0  0  0
   -0.2024    4.0037   -7.4708 C   0  0  0  0  0  0
    0.3366    2.6795   -6.9065 C   0  0  0  0  0  0
    0.3058    2.6449   -5.3659 C   0  0  0  0  0  0
   -2.4634    5.3474    1.4114 H   0  0  0  0  0  0
   -0.3214    1.0873    2.9311 H   0  0  0  0  0  0
   -1.0759    2.7784    4.5580 H   0  0  0  0  0  0
   -2.1242    4.8631    3.8170 H   0  0  0  0  0  0
   -2.0052    4.1451   -1.1665 H   0  0  0  0  0  0
   -1.1075    3.9657   -2.8766 H   0  0  0  0  0  0
   -1.7485    2.2173   -5.0692 H   0  0  0  0  0  0
   -2.7207    4.4109   -5.0903 H   0  0  0  0  0  0
   -1.1384    5.1637   -5.0473 H   0  0  0  0  0  0
   -2.3098    3.5517   -7.3415 H   0  0  0  0  0  0
   -1.9605    5.2595   -7.3269 H   0  0  0  0  0  0
   -0.2099    3.9674   -8.5608 H   0  0  0  0  0  0
    0.4679    4.8197   -7.1966 H   0  0  0  0  0  0
   -0.2573    1.8519   -7.2976 H   0  0  0  0  0  0
    1.3551    2.5134   -7.2597 H   0  0  0  0  0  0
    1.0538    3.3498   -4.9996 H   0  0  0  0  0  0
    0.6151    1.6553   -5.0270 H   0  0  0  0  0  0
    0.0310    0.1177    0.0093 C   0  0  0  0  0  0
    1.5896    0.1173   -0.1212 C   0  0  2  0  0  0
    2.2381    1.0174    0.9625 C   0  0  0  0  0  0
    1.9305    0.7030   -1.3676 O   0  0  0  0  0  0
    2.1691   -1.3452   -0.0848 C   0  0  0  0  0  0
    1.5817   -2.2888   -1.1634 C   0  0  0  0  0  0
    3.7148   -1.4202   -0.1391 C   0  0  0  0  0  0
   -0.2445   -0.4198    0.9175 H   0  0  0  0  0  0
   -0.4083   -0.4756   -0.7897 H   0  0  0  0  0  0
    2.0566    0.6250    1.9634 H   0  0  0  0  0  0
    1.8527    2.0369    0.9350 H   0  0  0  0  0  0
    3.3164    1.1110    0.8359 H   0  0  0  0  0  0
    2.8859    0.6907   -1.4567 H   0  0  0  0  0  0
    1.8833   -1.7732    0.8776 H   0  0  0  0  0  0
    1.7453   -1.9022   -2.1699 H   0  0  0  0  0  0
    0.5115   -2.4461   -1.0355 H   0  0  0  0  0  0
    2.0390   -3.2779   -1.1169 H   0  0  0  0  0  0
    4.1107   -0.9480   -1.0386 H   0  0  0  0  0  0
    4.0610   -2.4544   -0.1352 H   0  0  0  0  0  0
    4.1785   -0.9427    0.7236 H   0  0  0  0  0  0
  1  2  2  0  0  0
  1  6  1  0  0  0
  1 19  1  0  0  0
  2  3  1  0  0  0
  2  9  1  0  0  0
  3  4  2  0  0  0
  3  7  1  0  0  0
  4  5  1  0  0  0
  4 20  1  0  0  0
  5  6  2  0  0  0
  5 21  1  0  0  0
  6 22  1  0  0  0
  7  8  2  0  0  0
  7 36  1  0  0  0
  8  9  1  0  0  0
  8 10  1  0  0  0
  9 23  1  0  0  0
 10 11  1  0  0  0
 10 12  2  0  0  0
 11 13  1  0  0  0
 11 24  1  0  0  0
 13 18  1  0  0  0
 13 14  1  0  0  0
 13 25  1  0  0  0
 14 15  1  0  0  0
 14 26  1  0  0  0
 14 27  1  0  0  0
 15 16  1  0  0  0
 15 28  1  0  0  0
 15 29  1  0  0  0
 16 17  1  0  0  0
 16 30  1  0  0  0
 16 31  1  0  0  0
 17 18  1  0  0  0
 17 32  1  0  0  0
 17 33  1  0  0  0
 18 34  1  0  0  0
 18 35  1  0  0  0
 36 37  1  0  0  0
 36 43  1  0  0  0
 36 44  1  0  0  0
 37 38  1  0  0  0
 37 39  1  0  0  0
 37 40  1  0  0  0
 38 45  1  0  0  0
 38 46  1  0  0  0
 38 47  1  0  0  0
 39 48  1  0  0  0
 40 41  1  0  0  0
 40 42  1  0  0  0
 40 49  1  0  0  0
 41 50  1  0  0  0
 41 51  1  0  0  0
 41 52  1  0  0  0
 42 53  1  0  0  0
 42 54  1  0  0  0
 42 55  1  0  0  0
M  END
> <s_m_entry_id>
8144

> <s_m_entry_name>
entry

> <i_f3d_flags>
0

> <s_m_job_name>
adme_1000

> <r_psp_Prime_Energy>
-34143.669227996

> <r_psp_Prime_Solv_GB>
-5186.71365856626

> <r_psp_Prime_Coulomb>
-26496.371758971

> <r_psp_Prime_vdW>
-4056.47577844463

> <r_psp_Prime_Covalent>
4420.85386554866

> <i_psp_model_num>
0

> <r_psp_Prime_Lipo>
-2178.60695651645

> <s_psp_Prime_Energy_Force_Field>
S-OPLS

> <s_psp_Prime_Energy_Solvent_Model>
VSGB2.1

> <r_psp_Prime_Hbond>
-550.102407058727

> <r_psp_Prime_Packing>
-55.8446424272089

> <r_psp_Prime_SelfCont>
-40.4078915603482

> <r_psp_Memb1_x>
103.457542316003

> <r_psp_Memb1_y>
39.4731108300965

> <r_psp_Memb1_z>
48.7987221124676

> <r_psp_Memb2_x>
99.8134167309003

> <r_psp_Memb2_y>
2.81176945184187

> <r_psp_Memb2_z>
23.8404289603493

> <r_psp_MembDummyRadius>
4.45

> <r_psp_Prime_Bond_Covalent>
468.626280429741

> <r_psp_Prime_Bond_SGB>
49973.365064312

> <r_psp_Prime_Angle_Covalent>
2225.96386041881

> <r_psp_Prime_Angle_SGB>
-21658.1568988586

> <r_psp_Prime_Torsion_Covalent>
1726.26372470012

> <r_psp_Prime_NB14_LJ>
4242.40319056602

> <r_psp_Prime_NB14_Lipo>
0

> <r_psp_Prime_NB14_Elec>
25569.3083834045

> <r_psp_Prime_NB14_SGB>
-15621.0992497046

> <r_psp_Prime_NBShort_LJ>
-7883.93029513032

> <r_psp_Prime_NBShort_Lipo>
-2178.60695651645

> <r_psp_Prime_NBShort_Elec>
-53086.0398818405

> <r_psp_Prime_NBShort_SGB>
18022.881445189

> <r_psp_Prime_NBLong_LJ>
-414.948673880329

> <r_psp_Prime_NBLong_Lipo>
0

> <r_psp_Prime_NBLong_Elec>
1020.35973946506

> <r_psp_Prime_NBLong_SGB>
-1162.06098464502

> <r_psp_Prime_Self_SGB>
-34741.643034859

> <s_m_Source_Path>
F:\Dekstop_files\DAC4,5\Molecular Systems Desgn and Engineering\supplementary_str

> <s_m_Source_File>
1000_str.mae

> <i_m_Source_File_Index>
859

> <i_lp_mmshare_version>
53156

> <s_epik_input>
W2NIXTFbY0hdW2NIXVtjSF1jKGMxMiljKFtDSDJdW0NAXShbQ0gzXSkoW09IXSlbQ0hdKFtDSDNdKVtDSDNdKWMoW25IXTIpQyg9TylbTkhdW0NIXTNbQ0gyXVtDSDJdW0NIMl1bQ0gyXVtDSDJdMw==

> <s_epik_cmdline>
J2VwaWtfcHl0aG9uJywgJy1waHQnLCAnMC4wJywgJy1waCcsICc3LjAnLCAnLXRuJywgJzgnLCAnLW1hJywgJzUwMCcsICctaW1hZScsICc8aW5maWxlLm1hZT4nLCAnLW9tYWUnLCAnPG91dGZpbGUubWFlPic=

> <r_lp_tautomer_probability>
1

> <r_epik_Ionization_Penalty>
  0.0000

> <r_epik_Ionization_Penalty_Charging>
  0.0000

> <r_epik_Ionization_Penalty_Neutral>
  0.0000

> <r_epik_State_Penalty>
  0.0000

> <r_epik_Charging_Adjusted_Penalty>
0

> <i_epik_Tot_Q>
0

> <i_epik_Tot_abs_Q>
0

> <s_lp_Force_Field>
S-OPLS

> <r_lp_Energy>
34.759692

> <b_lp_Chiralities_Consistent>
1

> <s_lp_Variant>
ind_1,480335-1

> <s_i_glide_gridfile>
glide-grid_mmpl3

> <i_i_glide_lignum>
1943

> <i_i_glide_rotatable_bonds>
7

> <r_i_docking_score>
-8.30104372581488

> <r_i_glide_ligand_efficiency>
-0.332041749032595

> <r_i_glide_ligand_efficiency_sa>
-0.970895962956802

> <r_i_glide_ligand_efficiency_ln>
-1.96759612522471

> <r_i_glide_gscore>
-8.30104372581488

> <r_i_glide_evdw>
-40.0401039123535

> <r_i_glide_ecoul>
-1.07957088947296

> <r_i_glide_energy>
-41.1196748018265

> <r_i_glide_einternal>
9.72823715209961

> <r_i_glide_emodel>
-55.4543298070175

> <i_i_glide_confnum>
40

> <i_i_glide_posenum>
123

> <r_i_glide_eff_state_penalty>
0

> <i_rge_num_r_groups>
1

> <r_rge_occupation_R1>
1

> <s_rge_R1>
480335

> <s_rge_R1_s_m_title>
480335

> <s_rge_R1_s_m_entry_id>
17600

> <s_rge_R1_s_m_entry_name>
eMol_BB_r-groups.831

> <s_rge_R1_s_m_smiles>
[*]CC(C)(O)C(C)C

> <b_rge_R1_b_sd_chiral_flag>
0

> <i_rge_R1_i_sd_version>
0

> <s_rge_R1_s_m_Source_File>
eMol_BB_r-groups-dedup.mae

> <i_rge_R1_i_m_Source_File_Index>
686

> <s_rge_R1_s_m_Source_Path>
/Users/konze/projects/pathfinder/r-groups

> <s_rge_R1_s_sd_Source_Path>
/Users/konze/projects/pathfinder/reactant sets/eMolecules

> <s_rge_R1_s_sd_Source_File>
eMol BB r-groups.mae

> <i_rge_R1_i_sd_Source_File_Index>
831

> <r_rge_R1_r_sd_MW>
102.1748

> <i_rge_R1_i_sd_RB>
1

> <i_rge_R1_i_sd_HeavyAtomCount>
7

> <i_rge_R1_i_sd_HBA>
1

> <i_rge_R1_i_sd_HBD>
1

> <r_rge_R1_r_sd_PSA>
20.23

> <i_rge_R1_i_sd_ChiralCenterCount>
0

> <i_rge_R1_i_sd_ChiralCenterCountAllPossible>
0

> <i_rge_R1_i_sd_RingCount>
0

> <r_rge_R1_r_sd_AlogP>
1.4163

> <s_rge_R1_s_sd_subgroup_title>
eMol BB r-groups

> <s_rge_R1_s_sd_subgroupid>
eMol BB r-groups

> <i_rge_R1_i_sd_subgroup_collapsed>
0

> <s_rge_R1_s_sd_Unique_SMILES_Stereo>
CC(C)(O)C(C)C

> <i_rge_R1_i_sd_canvasUID>
772

> <s_rge_R1_s_canvas_Unique_SMILES_Stereo>
CC(C)(O)C(C)C

> <s_psp_Prime_MMGBSA_Input_Structure_Hash>
ae04769b8f7cefe1f1c582b5bce56da3085e01249866aea32bbd1723

> <i_psp_number_heavy_atoms>
25

> <r_psp_MMGBSA_dG_Bind>
-44.3460092645473

> <r_psp_MMGBSA_dG_Bind_Coulomb>
-4.63096869376022

> <r_psp_MMGBSA_dG_Bind_Covalent>
6.49675783929979

> <r_psp_MMGBSA_dG_Bind_Hbond>
-0.00480197554622919

> <r_psp_MMGBSA_dG_Bind_Lipo>
-26.2118522540641

> <r_psp_MMGBSA_dG_Bind_Packing>
4.9737991503207e-014

> <r_psp_MMGBSA_dG_Bind_SelfCont>
7.105427357601e-015

> <r_psp_MMGBSA_dG_Bind_Solv_GB>
27.1522986734899

> <r_psp_MMGBSA_dG_Bind_vdW>
-47.1474428538759

> <r_psp_Lig_Strain_Energy>
9.14641536529703

> <r_psp_Lig_Strain_Coulomb>
-0.064056498772878

> <r_psp_Lig_Strain_Covalent>
6.49695870741192

> <r_psp_Lig_Strain_Hbond>
0

> <r_psp_Lig_Strain_Lipo>
0.00348962387118723

> <r_psp_Lig_Strain_Packing>
0

> <r_psp_Lig_Strain_SelfCont>
0

> <r_psp_Lig_Strain_Solv_GB>
-0.629180430386015

> <r_psp_Lig_Strain_vdW>
3.33920396317279

> <r_psp_Ligand_Energy>
-4.07217799762893

> <r_psp_Ligand_Coulomb>
-32.8249763342495

> <r_psp_Ligand_Covalent>
23.9505818879531

> <r_psp_Ligand_Hbond>
0

> <r_psp_Ligand_Lipo>
-1.87047192490732

> <r_psp_Ligand_Packing>
0

> <r_psp_Ligand_SelfCont>
0

> <r_psp_Ligand_Solv_GB>
-7.31417687716262

> <r_psp_Ligand_vdW>
13.9868652507374

> <r_psp_Complex_Energy>
-34143.669227996

> <r_psp_Complex_Coulomb>
-26496.371758971

> <r_psp_Complex_Covalent>
4420.85386554866

> <r_psp_Complex_Hbond>
-550.102407058727

> <r_psp_Complex_Lipo>
-2178.60695651645

> <r_psp_Complex_Packing>
-55.8446424272089

> <r_psp_Complex_SelfCont>
-40.4078915603482

> <r_psp_Complex_Solv_GB>
-5186.71365856626

> <r_psp_Complex_vdW>
-4056.47577844463

> <r_psp_Receptor_Energy>
-34095.2510407338

> <r_psp_Receptor_Coulomb>
-26458.915813943

> <r_psp_Receptor_Covalent>
4390.40652582141

> <r_psp_Receptor_Hbond>
-550.097605083181

> <r_psp_Receptor_Lipo>
-2150.52463233748

> <r_psp_Receptor_Packing>
-55.8446424272089

> <r_psp_Receptor_SelfCont>
-40.4078915603482

> <r_psp_Receptor_Solv_GB>
-5206.55178036259

> <r_psp_Receptor_vdW>
-4023.31520084149

> <r_psp_MMGBSA_dG_Bind(NS)>
-53.492424629796

> <r_psp_MMGBSA_dG_Bind(NS)_Coulomb>
-4.56691219502682

> <r_psp_MMGBSA_dG_Bind(NS)_Covalent>
-0.000200868111278396

> <r_psp_MMGBSA_dG_Bind(NS)_Hbond>
-0.00480197554600181

> <r_psp_MMGBSA_dG_Bind(NS)_Lipo>
-26.2153418779303

> <r_psp_MMGBSA_dG_Bind(NS)_Packing>
0

> <r_psp_MMGBSA_dG_Bind(NS)_SelfCont>
0

> <r_psp_MMGBSA_dG_Bind(NS)_Solv_GB>
27.7814791038772

> <r_psp_MMGBSA_dG_Bind(NS)_vdW>
-50.486646817053

> <r_psp_Rec_Strain_Energy>
-5.0931703299284e-011

> <r_psp_Rec_Strain_Coulomb>
4.00177668780088e-011

> <r_psp_Rec_Strain_Covalent>
-9.09494701772928e-013

> <r_psp_Rec_Strain_Hbond>
-2.27373675443232e-013

> <r_psp_Rec_Strain_Lipo>
-5.00222085975111e-012

> <r_psp_Rec_Strain_Packing>
4.9737991503207e-014

> <r_psp_Rec_Strain_SelfCont>
7.105427357601e-015

> <r_psp_Rec_Strain_Solv_GB>
-1.81898940354586e-012

> <r_psp_Rec_Strain_vdW>
4.54747350886464e-012

> <r_psp_Prime_MMGBSA_ligand_efficiency>
-1.77384037058189

> <r_psp_Prime_MMGBSA_ligand_efficiency_sa>
-2.66076055587284

> <r_psp_Prime_MMGBSA_ligand_efficiency_ln>
-10.5113331383563

> <r_i_glide_lipo>
-5.05455336762742

> <r_i_glide_hbond>
0

> <r_i_glide_metal>
0

> <r_i_glide_rewards>
-1.89093453865113

> <r_i_glide_erotb>
0.808385009502289

> <r_i_glide_esite>
0

> <i_psp_ExecuteFunction_Internal_Entry_Index>
1392

> <i_qp_#stars>
0

> <i_qp_#amine>
0

> <i_qp_#amidine>
0

> <i_qp_#acid>
0

> <i_qp_#amide>
0

> <i_qp_#rotor>
6

> <i_qp_#rtvFG>
0

> <i_qp_CNS>
-1

> <r_qp_mol_MW>
   342.480

> <r_qp_dipole>
     4.870

> <r_qp_SASA>
   654.815

> <r_qp_FOSA>
   437.276

> <r_qp_FISA>
    56.534

> <r_qp_PISA>
   161.006

> <r_qp_WPSA>
     0.000

> <r_qp_volume>
  1180.777

> <r_qp_donorHB>
     3.000

> <r_qp_accptHB>
     3.250

> <r_qp_dip^2/V>
   0.0200874

> <r_qp_ACxDN^.5/SA>
   0.0085966

> <r_qp_glob>
   0.8250712

> <r_qp_QPpolrz>
    38.786

> <r_qp_QPlogPC16>
    11.400

> <r_qp_QPlogPoct>
    18.597

> <r_qp_QPlogPw>
     9.046

> <r_qp_QPlogPo/w>
     4.695

> <r_qp_QPlogS>
    -5.602

> <r_qp_CIQPlogS>
    -5.134

> <r_qp_QPlogHERG>
    -5.130

> <r_qp_QPPCaco>
  2882.647

> <r_qp_QPlogBB>
    -0.352

> <r_qp_QPPMDCK>
  1553.567

> <r_qp_QPlogKp>
    -1.418

> <r_qp_IP(eV)>
     8.288

> <r_qp_EA(eV)>
     0.290

> <i_qp_#metab>
2

> <r_qp_QPlogKhsa>
     0.740

> <i_qp_HumanOralAbsorption>
3

> <r_qp_PercentHumanOralAbsorption>
   100.000

> <r_qp_SAfluorine>
     0.000

> <r_qp_SAamideO>
     0.000

> <r_qp_PSA>
    63.389

> <i_qp_#NandO>
4

> <i_qp_RuleOfFive>
0

> <i_qp_RuleOfThree>
0

> <i_qp_#ringatoms>
15

> <i_qp_#in34>
0

> <i_qp_#in56>
15

> <i_qp_#noncon>
6

> <i_qp_#nonHatm>
25

> <r_qp_Jm>
0.0326958043845446

> <s_m_subgroupid>
100str_copy1

> <s_m_subgroup_title>
100str

> <b_m_subgroup_collapsed>
0

$$$$
ind_1,480335
                    3D
 Structure written by MMmdl.
 55 57  0  0  1  0            999 V2000
   -1.8624    4.5113   -1.5511 C   0  0  0  0  0  0
   -1.4403    3.4954   -0.6862 C   0  0  0  0  0  0
   -0.8803    2.2733   -1.1522 C   0  0  0  0  0  0
   -0.7512    2.0868   -2.5401 C   0  0  0  0  0  0
   -1.1670    3.0965   -3.4059 C   0  0  0  0  0  0
   -1.7105    4.2814   -2.9183 C   0  0  0  0  0  0
   -0.5619    1.4641   -0.0012 C   0  0  0  0  0  0
   -0.9241    2.2179    1.1256 C   0  0  0  0  0  0
   -1.4573    3.4120    0.6842 N   0  0  0  0  0  0
   -0.8640    1.8531    2.5290 C   0  0  0  0  0  0
   -0.9818    2.8858    3.3904 N   0  0  0  0  0  0
   -0.7319    0.6820    2.8854 O   0  0  0  0  0  0
   -0.9486    2.7922    4.8523 C   0  0  0  0  0  0
   -2.0555    1.9235    5.5110 C   0  0  0  0  0  0
   -1.9937    1.9162    7.0510 C   0  0  0  0  0  0
   -0.5895    1.5713    7.5736 C   0  0  0  0  0  0
    0.4686    2.5288    7.0012 C   0  0  0  0  0  0
    0.4588    2.5617    5.4598 C   0  0  0  0  0  0
   -2.2884    5.4345   -1.1863 H   0  0  0  0  0  0
   -0.3326    1.1743   -2.9380 H   0  0  0  0  0  0
   -1.0674    2.9569   -4.4723 H   0  0  0  0  0  0
   -2.0239    5.0421   -3.6184 H   0  0  0  0  0  0
   -1.8069    4.1078    1.3267 H   0  0  0  0  0  0
   -0.7623    3.7983    3.0194 H   0  0  0  0  0  0
   -1.2133    3.8063    5.1573 H   0  0  0  0  0  0
   -3.0415    2.2610    5.1887 H   0  0  0  0  0  0
   -1.9527    0.8898    5.1794 H   0  0  0  0  0  0
   -2.2893    2.8960    7.4292 H   0  0  0  0  0  0
   -2.7214    1.2069    7.4474 H   0  0  0  0  0  0
   -0.5778    1.6136    8.6634 H   0  0  0  0  0  0
   -0.3394    0.5436    7.3047 H   0  0  0  0  0  0
    0.2881    3.5345    7.3841 H   0  0  0  0  0  0
    1.4589    2.2431    7.3581 H   0  0  0  0  0  0
    0.8438    1.6044    5.1047 H   0  0  0  0  0  0
    1.1511    3.3293    5.1109 H   0  0  0  0  0  0
    0.0534    0.0665   -0.0744 C   0  0  0  0  0  0
    1.6148    0.0022   -0.0120 C   0  0  1  0  0  0
    2.2505    0.9096   -1.0967 C   0  0  0  0  0  0
    2.0305    0.5348    1.2354 O   0  0  0  0  0  0
    2.1350   -1.4792   -0.1194 C   0  0  0  0  0  0
    3.6774   -1.6155   -0.1279 C   0  0  0  0  0  0
    1.5519   -2.4377    0.9485 C   0  0  0  0  0  0
   -0.3755   -0.5416    0.7189 H   0  0  0  0  0  0
   -0.2801   -0.4245   -0.9896 H   0  0  0  0  0  0
    2.0044    0.5574   -2.0988 H   0  0  0  0  0  0
    3.3366    0.9540   -1.0211 H   0  0  0  0  0  0
    1.9106    1.9426   -1.0190 H   0  0  0  0  0  0
    2.9877    0.4846    1.2819 H   0  0  0  0  0  0
    1.7967   -1.8620   -1.0839 H   0  0  0  0  0  0
    4.1253   -1.1952    0.7730 H   0  0  0  0  0  0
    4.1279   -1.1236   -0.9892 H   0  0  0  0  0  0
    3.9813   -2.6613   -0.1848 H   0  0  0  0  0  0
    1.7650   -2.0921    1.9607 H   0  0  0  0  0  0
    1.9706   -3.4401    0.8520 H   0  0  0  0  0  0
    0.4729   -2.5529    0.8537 H   0  0  0  0  0  0
  1  2  2  0  0  0
  1  6  1  0  0  0
  1 19  1  0  0  0
  2  3  1  0  0  0
  2  9  1  0  0  0
  3  4  2  0  0  0
  3  7  1  0  0  0
  4  5  1  0  0  0
  4 20  1  0  0  0
  5  6  2  0  0  0
  5 21  1  0  0  0
  6 22  1  0  0  0
  7  8  2  0  0  0
  7 36  1  0  0  0
  8  9  1  0  0  0
  8 10  1  0  0  0
  9 23  1  0  0  0
 10 11  1  0  0  0
 10 12  2  0  0  0
 11 13  1  0  0  0
 11 24  1  0  0  0
 13 18  1  0  0  0
 13 14  1  0  0  0
 13 25  1  0  0  0
 14 15  1  0  0  0
 14 26  1  0  0  0
 14 27  1  0  0  0
 15 16  1  0  0  0
 15 28  1  0  0  0
 15 29  1  0  0  0
 16 17  1  0  0  0
 16 30  1  0  0  0
 16 31  1  0  0  0
 17 18  1  0  0  0
 17 32  1  0  0  0
 17 33  1  0  0  0
 18 34  1  0  0  0
 18 35  1  0  0  0
 36 37  1  0  0  0
 36 43  1  0  0  0
 36 44  1  0  0  0
 37 38  1  0  0  0
 37 39  1  0  0  0
 37 40  1  0  0  0
 38 45  1  0  0  0
 38 46  1  0  0  0
 38 47  1  0  0  0
 39 48  1  0  0  0
 40 41  1  0  0  0
 40 42  1  0  0  0
 40 49  1  0  0  0
 41 50  1  0  0  0
 41 51  1  0  0  0
 41 52  1  0  0  0
 42 53  1  0  0  0
 42 54  1  0  0  0
 42 55  1  0  0  0
M  END
> <s_m_entry_id>
8146

> <s_m_entry_name>
entry

> <i_f3d_flags>
0

> <s_m_job_name>
adme_1000

> <r_psp_Prime_Energy>
-34140.5399409139

> <r_psp_Prime_Solv_GB>
-5192.45028121697

> <r_psp_Prime_Coulomb>
-26491.628277814

> <r_psp_Prime_vdW>
-4047.91997948137

> <r_psp_Prime_Covalent>
4417.73325316285

> <i_psp_model_num>
0

> <r_psp_Prime_Lipo>
-2179.91034459195

> <s_psp_Prime_Energy_Force_Field>
S-OPLS

> <s_psp_Prime_Energy_Solvent_Model>
VSGB2.1

> <r_psp_Prime_Hbond>
-550.111776984885

> <r_psp_Prime_Packing>
-55.8446424272089

> <r_psp_Prime_SelfCont>
-40.4078915603482

> <r_psp_Memb1_x>
103.457542316003

> <r_psp_Memb1_y>
39.4731108300965

> <r_psp_Memb1_z>
48.7987221124676

> <r_psp_Memb2_x>
99.8134167309003

> <r_psp_Memb2_y>
2.81176945184187

> <r_psp_Memb2_z>
23.8404289603493

> <r_psp_MembDummyRadius>
4.45

> <r_psp_Prime_Bond_Covalent>
467.461342755333

> <r_psp_Prime_Bond_SGB>
49974.2382678068

> <r_psp_Prime_Angle_Covalent>
2226.75431214923

> <r_psp_Prime_Angle_SGB>
-21657.3173189598

> <r_psp_Prime_Torsion_Covalent>
1723.51759825829

> <r_psp_Prime_NB14_LJ>
4242.00668477394

> <r_psp_Prime_NB14_Lipo>
0

> <r_psp_Prime_NB14_Elec>
25575.4448581858

> <r_psp_Prime_NB14_SGB>
-15626.0766335895

> <r_psp_Prime_NBShort_LJ>
-7874.93146866649

> <r_psp_Prime_NBShort_Lipo>
-2179.91034459195

> <r_psp_Prime_NBShort_Elec>
-53084.614866127

> <r_psp_Prime_NBShort_SGB>
18027.6003053342

> <r_psp_Prime_NBLong_LJ>
-414.995195588828

> <r_psp_Prime_NBLong_Lipo>
0

> <r_psp_Prime_NBLong_Elec>
1017.54173012724

> <r_psp_Prime_NBLong_SGB>
-1168.47196638828

> <r_psp_Prime_Self_SGB>
-34742.4229354203

> <s_m_Source_Path>
F:\Dekstop_files\DAC4,5\Molecular Systems Desgn and Engineering\supplementary_str

> <s_m_Source_File>
1000_str.mae

> <i_m_Source_File_Index>
856

> <i_lp_mmshare_version>
53156

> <s_epik_input>
W2NIXTFbY0hdW2NIXVtjSF1jKGMxMiljKFtDSDJdW0NAQF0oW0NIM10pKFtPSF0pW0NIXShbQ0gzXSlbQ0gzXSljKFtuSF0yKUMoPU8pW05IXVtDSF0zW0NIMl1bQ0gyXVtDSDJdW0NIMl1bQ0gyXTM=

> <s_epik_cmdline>
J2VwaWtfcHl0aG9uJywgJy1waHQnLCAnMC4wJywgJy1waCcsICc3LjAnLCAnLXRuJywgJzgnLCAnLW1hJywgJzUwMCcsICctaW1hZScsICc8aW5maWxlLm1hZT4nLCAnLW9tYWUnLCAnPG91dGZpbGUubWFlPic=

> <r_lp_tautomer_probability>
1

> <r_epik_Ionization_Penalty>
  0.0000

> <r_epik_Ionization_Penalty_Charging>
  0.0000

> <r_epik_Ionization_Penalty_Neutral>
  0.0000

> <r_epik_State_Penalty>
  0.0000

> <r_epik_Charging_Adjusted_Penalty>
0

> <i_epik_Tot_Q>
0

> <i_epik_Tot_abs_Q>
0

> <s_lp_Force_Field>
S-OPLS

> <r_lp_Energy>
34.59218

> <b_lp_Chiralities_Consistent>
1

> <s_lp_Variant>
ind_1,480335-1

> <s_i_glide_gridfile>
glide-grid_mmpl3

> <i_i_glide_lignum>
1942

> <i_i_glide_rotatable_bonds>
7

> <r_i_docking_score>
-8.47861549877843

> <r_i_glide_ligand_efficiency>
-0.339144619951137

> <r_i_glide_ligand_efficiency_sa>
-0.991664883492571

> <r_i_glide_ligand_efficiency_ln>
-2.0096859568137

> <r_i_glide_gscore>
-8.47861549877843

> <r_i_glide_evdw>
-36.0102157592773

> <r_i_glide_ecoul>
-0.432531625032425

> <r_i_glide_energy>
-36.4427473843098

> <r_i_glide_einternal>
4.43049573898315

> <r_i_glide_emodel>
-52.1632424014514

> <i_i_glide_confnum>
95

> <i_i_glide_posenum>
288

> <r_i_glide_eff_state_penalty>
0

> <i_rge_num_r_groups>
1

> <r_rge_occupation_R1>
1

> <s_rge_R1>
480335

> <s_rge_R1_s_m_title>
480335

> <s_rge_R1_s_m_entry_id>
17600

> <s_rge_R1_s_m_entry_name>
eMol_BB_r-groups.831

> <s_rge_R1_s_m_smiles>
[*]CC(C)(O)C(C)C

> <b_rge_R1_b_sd_chiral_flag>
0

> <i_rge_R1_i_sd_version>
0

> <s_rge_R1_s_m_Source_File>
eMol_BB_r-groups-dedup.mae

> <i_rge_R1_i_m_Source_File_Index>
686

> <s_rge_R1_s_m_Source_Path>
/Users/konze/projects/pathfinder/r-groups

> <s_rge_R1_s_sd_Source_Path>
/Users/konze/projects/pathfinder/reactant sets/eMolecules

> <s_rge_R1_s_sd_Source_File>
eMol BB r-groups.mae

> <i_rge_R1_i_sd_Source_File_Index>
831

> <r_rge_R1_r_sd_MW>
102.1748

> <i_rge_R1_i_sd_RB>
1

> <i_rge_R1_i_sd_HeavyAtomCount>
7

> <i_rge_R1_i_sd_HBA>
1

> <i_rge_R1_i_sd_HBD>
1

> <r_rge_R1_r_sd_PSA>
20.23

> <i_rge_R1_i_sd_ChiralCenterCount>
0

> <i_rge_R1_i_sd_ChiralCenterCountAllPossible>
0

> <i_rge_R1_i_sd_RingCount>
0

> <r_rge_R1_r_sd_AlogP>
1.4163

> <s_rge_R1_s_sd_subgroup_title>
eMol BB r-groups

> <s_rge_R1_s_sd_subgroupid>
eMol BB r-groups

> <i_rge_R1_i_sd_subgroup_collapsed>
0

> <s_rge_R1_s_sd_Unique_SMILES_Stereo>
CC(C)(O)C(C)C

> <i_rge_R1_i_sd_canvasUID>
772

> <s_rge_R1_s_canvas_Unique_SMILES_Stereo>
CC(C)(O)C(C)C

> <s_psp_Prime_MMGBSA_Input_Structure_Hash>
2a6f6c03940f9bbf8a459ca8552b0f04c1da7045dca6a97252e85ba9

> <i_psp_number_heavy_atoms>
25

> <r_psp_MMGBSA_dG_Bind>
-44.4262482824779

> <r_psp_MMGBSA_dG_Bind_Coulomb>
-5.42753105481097

> <r_psp_MMGBSA_dG_Bind_Covalent>
3.08472018615157

> <r_psp_MMGBSA_dG_Bind_Hbond>
-0.0141719017036621

> <r_psp_MMGBSA_dG_Bind_Lipo>
-27.3111365237723

> <r_psp_MMGBSA_dG_Bind_Packing>
4.9737991503207e-014

> <r_psp_MMGBSA_dG_Bind_SelfCont>
7.105427357601e-015

> <r_psp_MMGBSA_dG_Bind_Solv_GB>
23.3474718333309

> <r_psp_MMGBSA_dG_Bind_vdW>
-38.1056008215833

> <r_psp_Lig_Strain_Energy>
5.17755481769819

> <r_psp_Lig_Strain_Coulomb>
-1.06559539922161

> <r_psp_Lig_Strain_Covalent>
3.08492105426346

> <r_psp_Lig_Strain_Hbond>
0

> <r_psp_Lig_Strain_Lipo>
-0.0569685054394804

> <r_psp_Lig_Strain_Packing>
0

> <r_psp_Lig_Strain_SelfCont>
0

> <r_psp_Lig_Strain_Solv_GB>
0.191981284757901

> <r_psp_Lig_Strain_vdW>
3.02321638333788

> <r_psp_Ligand_Energy>
-0.862651897594446

> <r_psp_Ligand_Coulomb>
-27.2849328161872

> <r_psp_Ligand_Covalent>
24.2420071552935

> <r_psp_Ligand_Hbond>
0

> <r_psp_Ligand_Lipo>
-2.07457573069332

> <r_psp_Ligand_Packing>
0

> <r_psp_Ligand_SelfCont>
0

> <r_psp_Ligand_Solv_GB>
-9.24597268770745

> <r_psp_Ligand_vdW>
13.5008221817

> <r_psp_Complex_Energy>
-34140.5399409139

> <r_psp_Complex_Coulomb>
-26491.628277814

> <r_psp_Complex_Covalent>
4417.73325316285

> <r_psp_Complex_Hbond>
-550.111776984885

> <r_psp_Complex_Lipo>
-2179.91034459195

> <r_psp_Complex_Packing>
-55.8446424272089

> <r_psp_Complex_SelfCont>
-40.4078915603482

> <r_psp_Complex_Solv_GB>
-5192.45028121697

> <r_psp_Complex_vdW>
-4047.91997948137

> <r_psp_Receptor_Energy>
-34095.2510407338

> <r_psp_Receptor_Coulomb>
-26458.915813943

> <r_psp_Receptor_Covalent>
4390.40652582141

> <r_psp_Receptor_Hbond>
-550.097605083181

> <r_psp_Receptor_Lipo>
-2150.52463233748

> <r_psp_Receptor_Packing>
-55.8446424272089

> <r_psp_Receptor_SelfCont>
-40.4078915603482

> <r_psp_Receptor_Solv_GB>
-5206.55178036259

> <r_psp_Receptor_vdW>
-4023.31520084149

> <r_psp_MMGBSA_dG_Bind(NS)>
-49.6038031001226

> <r_psp_MMGBSA_dG_Bind(NS)_Coulomb>
-4.36193565563008

> <r_psp_MMGBSA_dG_Bind(NS)_Covalent>
-0.000200868111278396

> <r_psp_MMGBSA_dG_Bind(NS)_Hbond>
-0.0141719017034347

> <r_psp_MMGBSA_dG_Bind(NS)_Lipo>
-27.2541680183276

> <r_psp_MMGBSA_dG_Bind(NS)_Packing>
0

> <r_psp_MMGBSA_dG_Bind(NS)_SelfCont>
0

> <r_psp_MMGBSA_dG_Bind(NS)_Solv_GB>
23.1554905485746

> <r_psp_MMGBSA_dG_Bind(NS)_vdW>
-41.1288172049253

> <r_psp_Rec_Strain_Energy>
-5.0931703299284e-011

> <r_psp_Rec_Strain_Coulomb>
4.00177668780088e-011

> <r_psp_Rec_Strain_Covalent>
-9.09494701772928e-013

> <r_psp_Rec_Strain_Hbond>
-2.27373675443232e-013

> <r_psp_Rec_Strain_Lipo>
-5.00222085975111e-012

> <r_psp_Rec_Strain_Packing>
4.9737991503207e-014

> <r_psp_Rec_Strain_SelfCont>
7.105427357601e-015

> <r_psp_Rec_Strain_Solv_GB>
-1.81898940354586e-012

> <r_psp_Rec_Strain_vdW>
4.54747350886464e-012

> <r_psp_Prime_MMGBSA_ligand_efficiency>
-1.77704993129912

> <r_psp_Prime_MMGBSA_ligand_efficiency_sa>
-2.66557489694867

> <r_psp_Prime_MMGBSA_ligand_efficiency_ln>
-10.5303521901752

> <r_i_glide_lipo>
-5.39363444605935

> <r_i_glide_hbond>
0

> <r_i_glide_metal>
0

> <r_i_glide_rewards>
-2.02797553050264

> <r_i_glide_erotb>
0.808385009502289

> <r_i_glide_esite>
0

> <i_psp_ExecuteFunction_Internal_Entry_Index>
1111

> <i_qp_#stars>
0

> <i_qp_#amine>
0

> <i_qp_#amidine>
0

> <i_qp_#acid>
0

> <i_qp_#amide>
0

> <i_qp_#rotor>
6

> <i_qp_#rtvFG>
0

> <i_qp_CNS>
-1

> <r_qp_mol_MW>
   342.480

> <r_qp_dipole>
     4.488

> <r_qp_SASA>
   651.862

> <r_qp_FOSA>
   436.712

> <r_qp_FISA>
    54.210

> <r_qp_PISA>
   160.941

> <r_qp_WPSA>
     0.000

> <r_qp_volume>
  1177.252

> <r_qp_donorHB>
     3.000

> <r_qp_accptHB>
     3.250

> <r_qp_dip^2/V>
   0.0171120

> <r_qp_ACxDN^.5/SA>
   0.0086355

> <r_qp_glob>
   0.8271586

> <r_qp_QPpolrz>
    38.644

> <r_qp_QPlogPC16>
    11.350

> <r_qp_QPlogPoct>
    18.502

> <r_qp_QPlogPw>
     9.023

> <r_qp_QPlogPo/w>
     4.689

> <r_qp_QPlogS>
    -5.550

> <r_qp_CIQPlogS>
    -5.134

> <r_qp_QPlogHERG>
    -5.096

> <r_qp_QPPCaco>
  3032.708

> <r_qp_QPlogBB>
    -0.326

> <r_qp_QPPMDCK>
  1641.164

> <r_qp_QPlogKp>
    -1.376

> <r_qp_IP(eV)>
     8.282

> <r_qp_EA(eV)>
     0.301

> <i_qp_#metab>
2

> <r_qp_QPlogKhsa>
     0.731

> <i_qp_HumanOralAbsorption>
3

> <r_qp_PercentHumanOralAbsorption>
   100.000

> <r_qp_SAfluorine>
     0.000

> <r_qp_SAamideO>
     0.000

> <r_qp_PSA>
    62.528

> <i_qp_#NandO>
4

> <i_qp_RuleOfFive>
0

> <i_qp_RuleOfThree>
0

> <i_qp_#ringatoms>
15

> <i_qp_#in34>
0

> <i_qp_#in56>
15

> <i_qp_#noncon>
6

> <i_qp_#nonHatm>
25

> <r_qp_Jm>
0.0406594835286031

> <s_m_subgroupid>
100str_copy1

> <s_m_subgroup_title>
100str

> <b_m_subgroup_collapsed>
0

$$$$
ind_1,480335
                    3D
 Structure written by MMmdl.
 55 57  0  0  1  0            999 V2000
    6.8882   -0.9457    1.2592 C   0  0  0  0  0  0
    5.8074   -0.0577    1.2305 C   0  0  0  0  0  0
    4.4549   -0.4923    1.3024 C   0  0  0  0  0  0
    4.2021   -1.8715    1.4068 C   0  0  0  0  0  0
    5.2752   -2.7602    1.4391 C   0  0  0  0  0  0
    6.5882   -2.3036    1.3665 C   0  0  0  0  0  0
    3.6117    0.6752    1.2433 C   0  0  0  0  0  0
    4.4686    1.7824    1.1561 C   0  0  0  0  0  0
    5.7660    1.3116    1.1320 N   0  0  0  0  0  0
    4.1355    3.1887    1.0220 C   0  0  0  0  0  0
    5.1604    4.0417    1.2269 N   0  0  0  0  0  0
    2.9935    3.5594    0.7486 O   0  0  0  0  0  0
    5.0961    5.5010    1.1211 C   0  0  0  0  0  0
    6.2597    6.2119    1.8540 C   0  0  0  0  0  0
    6.2219    7.7482    1.7338 C   0  0  0  0  0  0
    6.0889    8.2151    0.2754 C   0  0  0  0  0  0
    4.8608    7.5844   -0.4003 C   0  0  0  0  0  0
    4.8706    6.0453   -0.3154 C   0  0  0  0  0  0
    7.9116   -0.6049    1.2024 H   0  0  0  0  0  0
    3.1899   -2.2442    1.4624 H   0  0  0  0  0  0
    5.0856   -3.8204    1.5213 H   0  0  0  0  0  0
    7.3959   -3.0206    1.3937 H   0  0  0  0  0  0
    6.5568    1.9336    1.0492 H   0  0  0  0  0  0
    6.0769    3.6547    1.3955 H   0  0  0  0  0  0
    4.2064    5.8035    1.6797 H   0  0  0  0  0  0
    6.2668    5.9337    2.9090 H   0  0  0  0  0  0
    7.2049    5.8686    1.4302 H   0  0  0  0  0  0
    5.3833    8.1354    2.3146 H   0  0  0  0  0  0
    7.1208    8.1762    2.1793 H   0  0  0  0  0  0
    6.0160    9.3028    0.2385 H   0  0  0  0  0  0
    6.9902    7.9503   -0.2794 H   0  0  0  0  0  0
    3.9540    7.9652    0.0722 H   0  0  0  0  0  0
    4.8108    7.8964   -1.4443 H   0  0  0  0  0  0
    5.6714    5.6790   -0.9596 H   0  0  0  0  0  0
    3.9358    5.6631   -0.7276 H   0  0  0  0  0  0
   -0.5406   -0.9961    1.1817 C   0  0  0  0  0  0
   -0.1232   -0.0358    0.0424 C   0  0  0  0  0  0
   -0.7406   -0.5406   -1.2836 C   0  0  0  0  0  0
   -0.7342    1.2128    0.3191 O   0  0  0  0  0  0
    1.4342    0.1560   -0.0533 C   0  0  2  0  0  0
    2.0885    0.6288    1.2808 C   0  0  0  0  0  0
    1.8649    1.0621   -1.2374 C   0  0  0  0  0  0
   -0.0336   -1.9575    1.0927 H   0  0  0  0  0  0
   -1.6140   -1.1925    1.1694 H   0  0  0  0  0  0
   -0.3185   -0.5957    2.1708 H   0  0  0  0  0  0
   -0.2678   -1.4667   -1.6121 H   0  0  0  0  0  0
   -0.6432    0.1846   -2.0918 H   0  0  0  0  0  0
   -1.8084   -0.7397   -1.1811 H   0  0  0  0  0  0
   -0.3653    1.5566    1.1359 H   0  0  0  0  0  0
    1.8485   -0.8310   -0.2661 H   0  0  0  0  0  0
    1.8005   -0.0337    2.0954 H   0  0  0  0  0  0
    1.6711    1.5943    1.5628 H   0  0  0  0  0  0
    1.4593    2.0694   -1.1399 H   0  0  0  0  0  0
    1.5391    0.6635   -2.1972 H   0  0  0  0  0  0
    2.9487    1.1526   -1.3077 H   0  0  0  0  0  0
  1  2  2  0  0  0
  1  6  1  0  0  0
  1 19  1  0  0  0
  2  3  1  0  0  0
  2  9  1  0  0  0
  3  4  2  0  0  0
  3  7  1  0  0  0
  4  5  1  0  0  0
  4 20  1  0  0  0
  5  6  2  0  0  0
  5 21  1  0  0  0
  6 22  1  0  0  0
  7  8  2  0  0  0
  7 41  1  0  0  0
  8  9  1  0  0  0
  8 10  1  0  0  0
  9 23  1  0  0  0
 10 11  1  0  0  0
 10 12  2  0  0  0
 11 13  1  0  0  0
 11 24  1  0  0  0
 13 18  1  0  0  0
 13 14  1  0  0  0
 13 25  1  0  0  0
 14 15  1  0  0  0
 14 26  1  0  0  0
 14 27  1  0  0  0
 15 16  1  0  0  0
 15 28  1  0  0  0
 15 29  1  0  0  0
 16 17  1  0  0  0
 16 30  1  0  0  0
 16 31  1  0  0  0
 17 18  1  0  0  0
 17 32  1  0  0  0
 17 33  1  0  0  0
 18 34  1  0  0  0
 18 35  1  0  0  0
 36 37  1  0  0  0
 36 43  1  0  0  0
 36 44  1  0  0  0
 36 45  1  0  0  0
 37 38  1  0  0  0
 37 39  1  0  0  0
 37 40  1  0  0  0
 38 46  1  0  0  0
 38 47  1  0  0  0
 38 48  1  0  0  0
 39 49  1  0  0  0
 40 41  1  0  0  0
 40 42  1  0  0  0
 40 50  1  0  0  0
 41 51  1  0  0  0
 41 52  1  0  0  0
 42 53  1  0  0  0
 42 54  1  0  0  0
 42 55  1  0  0  0
M  END
> <s_m_entry_id>
8083

> <s_m_entry_name>
entry

> <i_f3d_flags>
0

> <s_m_job_name>
adme_1000

> <r_psp_Prime_Energy>
-34145.3836936256

> <r_psp_Prime_Solv_GB>
-5185.99775023179

> <r_psp_Prime_Coulomb>
-26502.8983005032

> <r_psp_Prime_vdW>
-4048.5670253396

> <r_psp_Prime_Covalent>
4418.78816370754

> <i_psp_model_num>
0

> <r_psp_Prime_Lipo>
-2179.95158400915

> <s_psp_Prime_Energy_Force_Field>
S-OPLS

> <s_psp_Prime_Energy_Solvent_Model>
VSGB2.1

> <r_psp_Prime_Hbond>
-550.50466326183

> <r_psp_Prime_Packing>
-55.8446424272089

> <r_psp_Prime_SelfCont>
-40.4078915603482

> <r_psp_Memb1_x>
103.457542316003

> <r_psp_Memb1_y>
39.4731108300965

> <r_psp_Memb1_z>
48.7987221124676

> <r_psp_Memb2_x>
99.8134167309003

> <r_psp_Memb2_y>
2.81176945184187

> <r_psp_Memb2_z>
23.8404289603493

> <r_psp_MembDummyRadius>
4.45

> <r_psp_Prime_Bond_Covalent>
467.339485932605

> <r_psp_Prime_Bond_SGB>
49977.3994308569

> <r_psp_Prime_Angle_Covalent>
2226.6205283946

> <r_psp_Prime_Angle_SGB>
-21662.3653486117

> <r_psp_Prime_Torsion_Covalent>
1724.82814938034

> <r_psp_Prime_NB14_LJ>
4242.53972504032

> <r_psp_Prime_NB14_Lipo>
0

> <r_psp_Prime_NB14_Elec>
25538.9470476586

> <r_psp_Prime_NB14_SGB>
-15613.2096179141

> <r_psp_Prime_NBShort_LJ>
-7876.05299850084

> <r_psp_Prime_NBShort_Lipo>
-2179.95158400915

> <r_psp_Prime_NBShort_Elec>
-53056.4229463561

> <r_psp_Prime_NBShort_SGB>
18019.8129581123

> <r_psp_Prime_NBLong_LJ>
-415.053751879084

> <r_psp_Prime_NBLong_Lipo>
0

> <r_psp_Prime_NBLong_Elec>
1014.57759819426

> <r_psp_Prime_NBLong_SGB>
-1163.12092988014

> <r_psp_Prime_Self_SGB>
-34744.5142427951

> <s_m_Source_Path>
F:\Dekstop_files\DAC4,5\Molecular Systems Desgn and Engineering\supplementary_str

> <s_m_Source_File>
1000_str.mae

> <i_m_Source_File_Index>
828

> <i_lp_mmshare_version>
53156

> <s_epik_input>
W2NIXTFbY0hdW2NIXVtjSF1jKGMxMiljKFtDSDJdW0NASF0oW0NIM10pQyhbQ0gzXSkoW0NIM10pW09IXSljKFtuSF0yKUMoPU8pW05IXVtDSF0zW0NIMl1bQ0gyXVtDSDJdW0NIMl1bQ0gyXTM=

> <s_epik_cmdline>
J2VwaWtfcHl0aG9uJywgJy1waHQnLCAnMC4wJywgJy1waCcsICc3LjAnLCAnLXRuJywgJzgnLCAnLW1hJywgJzUwMCcsICctaW1hZScsICc8aW5maWxlLm1hZT4nLCAnLW9tYWUnLCAnPG91dGZpbGUubWFlPic=

> <r_lp_tautomer_probability>
1

> <r_epik_Ionization_Penalty>
  0.0000

> <r_epik_Ionization_Penalty_Charging>
  0.0000

> <r_epik_Ionization_Penalty_Neutral>
  0.0000

> <r_epik_State_Penalty>
  0.0000

> <r_epik_Charging_Adjusted_Penalty>
0

> <i_epik_Tot_Q>
0

> <i_epik_Tot_abs_Q>
0

> <s_lp_Force_Field>
S-OPLS

> <r_lp_Energy>
33.337673

> <b_lp_Chiralities_Consistent>
1

> <s_lp_Variant>
ind_1,480335-1

> <s_i_glide_gridfile>
glide-grid_mmpl3

> <i_i_glide_lignum>
1945

> <i_i_glide_rotatable_bonds>
7

> <r_i_docking_score>
-8.68653188861639

> <r_i_glide_ligand_efficiency>
-0.347461275544656

> <r_i_glide_ligand_efficiency_sa>
-1.01598293194453

> <r_i_glide_ligand_efficiency_ln>
-2.05896837195671

> <r_i_glide_gscore>
-8.68653188861639

> <r_i_glide_evdw>
-38.6260643005371

> <r_i_glide_ecoul>
-1.08756721019745

> <r_i_glide_energy>
-39.7136315107346

> <r_i_glide_einternal>
4.71944999694824

> <r_i_glide_emodel>
-57.9649606267746

> <i_i_glide_confnum>
201

> <i_i_glide_posenum>
316

> <r_i_glide_eff_state_penalty>
0

> <i_rge_num_r_groups>
1

> <r_rge_occupation_R1>
1

> <s_rge_R1>
480335

> <s_rge_R1_s_m_title>
480335

> <s_rge_R1_s_m_entry_id>
17602

> <s_rge_R1_s_m_entry_name>
eMol_BB_r-groups.831

> <s_rge_R1_s_m_smiles>
[*]CC(C)C(C)(C)O

> <b_rge_R1_b_sd_chiral_flag>
0

> <i_rge_R1_i_sd_version>
0

> <s_rge_R1_s_m_Source_File>
eMol_BB_r-groups-dedup.mae

> <i_rge_R1_i_m_Source_File_Index>
686

> <s_rge_R1_s_m_Source_Path>
/Users/konze/projects/pathfinder/r-groups

> <s_rge_R1_s_sd_Source_Path>
/Users/konze/projects/pathfinder/reactant sets/eMolecules

> <s_rge_R1_s_sd_Source_File>
eMol BB r-groups.mae

> <i_rge_R1_i_sd_Source_File_Index>
831

> <r_rge_R1_r_sd_MW>
102.1748

> <i_rge_R1_i_sd_RB>
1

> <i_rge_R1_i_sd_HeavyAtomCount>
7

> <i_rge_R1_i_sd_HBA>
1

> <i_rge_R1_i_sd_HBD>
1

> <r_rge_R1_r_sd_PSA>
20.23

> <i_rge_R1_i_sd_ChiralCenterCount>
0

> <i_rge_R1_i_sd_ChiralCenterCountAllPossible>
0

> <i_rge_R1_i_sd_RingCount>
0

> <r_rge_R1_r_sd_AlogP>
1.4163

> <s_rge_R1_s_sd_subgroup_title>
eMol BB r-groups

> <s_rge_R1_s_sd_subgroupid>
eMol BB r-groups

> <i_rge_R1_i_sd_subgroup_collapsed>
0

> <s_rge_R1_s_sd_Unique_SMILES_Stereo>
CC(C)(O)C(C)C

> <i_rge_R1_i_sd_canvasUID>
772

> <s_rge_R1_s_canvas_Unique_SMILES_Stereo>
CC(C)(O)C(C)C

> <s_psp_Prime_MMGBSA_Input_Structure_Hash>
89739f8897b8ed932adefb29cdaf7fdde3c1a14f157290f24d348376

> <i_psp_number_heavy_atoms>
25

> <r_psp_MMGBSA_dG_Bind>
-40.3961173834614

> <r_psp_MMGBSA_dG_Bind_Coulomb>
-9.98870618386354

> <r_psp_MMGBSA_dG_Bind_Covalent>
4.01231474690667

> <r_psp_MMGBSA_dG_Bind_Hbond>
-0.407058178648981

> <r_psp_MMGBSA_dG_Bind_Lipo>
-27.26140931695

> <r_psp_MMGBSA_dG_Bind_Packing>
4.9737991503207e-014

> <r_psp_MMGBSA_dG_Bind_SelfCont>
7.105427357601e-015

> <r_psp_MMGBSA_dG_Bind_Solv_GB>
31.4078936699616

> <r_psp_MMGBSA_dG_Bind_vdW>
-38.1591521207683

> <r_psp_Lig_Strain_Energy>
7.14025197902228

> <r_psp_Lig_Strain_Coulomb>
-1.0160146553723

> <r_psp_Lig_Strain_Covalent>
4.01251561501932

> <r_psp_Lig_Strain_Hbond>
0

> <r_psp_Lig_Strain_Lipo>
-0.00377867809948285

> <r_psp_Lig_Strain_Packing>
0

> <r_psp_Lig_Strain_SelfCont>
0

> <r_psp_Lig_Strain_Solv_GB>
0.114102394175177

> <r_psp_Lig_Strain_vdW>
4.03342730329958

> <r_psp_Ligand_Energy>
-9.7365355083588

> <r_psp_Ligand_Coulomb>
-33.9937803763601

> <r_psp_Ligand_Covalent>
24.3693231392268

> <r_psp_Ligand_Hbond>
0

> <r_psp_Ligand_Lipo>
-2.16554235471925

> <r_psp_Ligand_Packing>
0

> <r_psp_Ligand_SelfCont>
0

> <r_psp_Ligand_Solv_GB>
-10.8538635391646

> <r_psp_Ligand_vdW>
12.9073276226584

> <r_psp_Complex_Energy>
-34145.3836936256

> <r_psp_Complex_Coulomb>
-26502.8983005032

> <r_psp_Complex_Covalent>
4418.78816370754

> <r_psp_Complex_Hbond>
-550.50466326183

> <r_psp_Complex_Lipo>
-2179.95158400915

> <r_psp_Complex_Packing>
-55.8446424272089

> <r_psp_Complex_SelfCont>
-40.4078915603482

> <r_psp_Complex_Solv_GB>
-5185.99775023179

> <r_psp_Complex_vdW>
-4048.5670253396

> <r_psp_Receptor_Energy>
-34095.2510407338

> <r_psp_Receptor_Coulomb>
-26458.915813943

> <r_psp_Receptor_Covalent>
4390.40652582141

> <r_psp_Receptor_Hbond>
-550.097605083181

> <r_psp_Receptor_Lipo>
-2150.52463233748

> <r_psp_Receptor_Packing>
-55.8446424272089

> <r_psp_Receptor_SelfCont>
-40.4078915603482

> <r_psp_Receptor_Solv_GB>
-5206.55178036259

> <r_psp_Receptor_vdW>
-4023.31520084149

> <r_psp_MMGBSA_dG_Bind(NS)>
-47.5363693624313

> <r_psp_MMGBSA_dG_Bind(NS)_Coulomb>
-8.97269152853187

> <r_psp_MMGBSA_dG_Bind(NS)_Covalent>
-0.000200868111278396

> <r_psp_MMGBSA_dG_Bind(NS)_Hbond>
-0.407058178648754

> <r_psp_MMGBSA_dG_Bind(NS)_Lipo>
-27.2576306388455

> <r_psp_MMGBSA_dG_Bind(NS)_Packing>
0

> <r_psp_MMGBSA_dG_Bind(NS)_SelfCont>
0

> <r_psp_MMGBSA_dG_Bind(NS)_Solv_GB>
31.2937912757889

> <r_psp_MMGBSA_dG_Bind(NS)_vdW>
-42.1925794240728

> <r_psp_Rec_Strain_Energy>
-5.0931703299284e-011

> <r_psp_Rec_Strain_Coulomb>
4.00177668780088e-011

> <r_psp_Rec_Strain_Covalent>
-9.09494701772928e-013

> <r_psp_Rec_Strain_Hbond>
-2.27373675443232e-013

> <r_psp_Rec_Strain_Lipo>
-5.00222085975111e-012

> <r_psp_Rec_Strain_Packing>
4.9737991503207e-014

> <r_psp_Rec_Strain_SelfCont>
7.105427357601e-015

> <r_psp_Rec_Strain_Solv_GB>
-1.81898940354586e-012

> <r_psp_Rec_Strain_vdW>
4.54747350886464e-012

> <r_psp_Prime_MMGBSA_ligand_efficiency>
-1.61584469533846

> <r_psp_Prime_MMGBSA_ligand_efficiency_sa>
-2.42376704300768

> <r_psp_Prime_MMGBSA_ligand_efficiency_ln>
-9.57509039383101

> <r_i_glide_lipo>
-5.47816733212054

> <r_i_glide_hbond>
0

> <r_i_glide_metal>
0

> <r_i_glide_rewards>
-2.08398827134212

> <r_i_glide_erotb>
0.970062011402747

> <r_i_glide_esite>
0

> <i_psp_ExecuteFunction_Internal_Entry_Index>
729

> <i_qp_#stars>
0

> <i_qp_#amine>
0

> <i_qp_#amidine>
0

> <i_qp_#acid>
0

> <i_qp_#amide>
0

> <i_qp_#rotor>
6

> <i_qp_#rtvFG>
0

> <i_qp_CNS>
-1

> <r_qp_mol_MW>
   342.480

> <r_qp_dipole>
     7.596

> <r_qp_SASA>
   655.233

> <r_qp_FOSA>
   423.679

> <r_qp_FISA>
    74.449

> <r_qp_PISA>
   157.105

> <r_qp_WPSA>
     0.000

> <r_qp_volume>
  1185.682

> <r_qp_donorHB>
     3.000

> <r_qp_accptHB>
     3.250

> <r_qp_dip^2/V>
   0.0486652

> <r_qp_ACxDN^.5/SA>
   0.0085911

> <r_qp_glob>
   0.8268280

> <r_qp_QPpolrz>
    38.945

> <r_qp_QPlogPC16>
    11.545

> <r_qp_QPlogPoct>
    19.136

> <r_qp_QPlogPw>
     9.143

> <r_qp_QPlogPo/w>
     4.598

> <r_qp_QPlogS>
    -5.609

> <r_qp_CIQPlogS>
    -5.134

> <r_qp_QPlogHERG>
    -5.083

> <r_qp_QPPCaco>
  1949.390

> <r_qp_QPlogBB>
    -0.524

> <r_qp_QPPMDCK>
  1017.879

> <r_qp_QPlogKp>
    -1.762

> <r_qp_IP(eV)>
     8.448

> <r_qp_EA(eV)>
     0.479

> <i_qp_#metab>
2

> <r_qp_QPlogKhsa>
     0.754

> <i_qp_HumanOralAbsorption>
3

> <r_qp_PercentHumanOralAbsorption>
   100.000

> <r_qp_SAfluorine>
     0.000

> <r_qp_SAamideO>
     0.000

> <r_qp_PSA>
    66.586

> <i_qp_#NandO>
4

> <i_qp_RuleOfFive>
0

> <i_qp_RuleOfThree>
0

> <i_qp_#ringatoms>
15

> <i_qp_#in34>
0

> <i_qp_#in56>
15

> <i_qp_#noncon>
6

> <i_qp_#nonHatm>
25

> <r_qp_Jm>
0.0145615482240677

> <s_m_subgroupid>
100str_copy1

> <s_m_subgroup_title>
100str

> <b_m_subgroup_collapsed>
0

$$$$
ind_1,490699
                    3D
 Structure written by MMmdl.
 48 51  0  0  1  0            999 V2000
   -3.4963   -1.2754    0.0000 C   0  0  0  0  0  0
   -2.2753   -0.5920   -0.0000 C   0  0  0  0  0  0
   -0.9836   -1.2041    0.0000 C   0  0  0  0  0  0
   -1.0305   -2.6238    0.0000 C   0  0  0  0  0  0
   -2.2344   -3.3244    0.0000 C   0  0  0  0  0  0
   -3.4469   -2.6603    0.0000 C   0  0  0  0  0  0
    0.0440   -0.1215    0.0000 C   0  0  0  0  0  0
   -0.7500    1.1032   -0.0000 C   0  0  0  0  0  0
   -2.0743    0.7415   -0.0000 N   0  0  0  0  0  0
   -0.4781    2.5692   -0.0001 C   0  0  0  0  0  0
   -1.5736    3.3682    0.0001 N   0  0  0  0  0  0
    0.6395    3.0745   -0.0004 O   0  0  0  0  0  0
   -1.6015    4.8345    0.0000 C   0  0  0  0  0  0
   -2.2451    5.4194   -1.2816 C   0  0  0  0  0  0
   -2.3612    6.9566   -1.2688 C   0  0  0  0  0  0
   -3.0568    7.4759    0.0000 C   0  0  0  0  0  0
   -2.3612    6.9566    1.2688 C   0  0  0  0  0  0
   -2.2451    5.4195    1.2816 C   0  0  0  0  0  0
   -4.4431   -0.7558   -0.0000 H   0  0  0  0  0  0
   -0.1870   -3.2628    0.0000 H   0  0  0  0  0  0
   -2.2233   -4.4049    0.0000 H   0  0  0  0  0  0
   -4.3657   -3.2279    0.0000 H   0  0  0  0  0  0
   -2.8043    1.4378   -0.0000 H   0  0  0  0  0  0
   -2.4804    2.9277    0.0001 H   0  0  0  0  0  0
   -0.5771    5.2142    0.0000 H   0  0  0  0  0  0
   -1.6751    5.1107   -2.1592 H   0  0  0  0  0  0
   -3.2480    5.0050   -1.3986 H   0  0  0  0  0  0
   -1.3637    7.3935   -1.3390 H   0  0  0  0  0  0
   -2.9019    7.2950   -2.1535 H   0  0  0  0  0  0
   -3.0655    8.5665   -0.0000 H   0  0  0  0  0  0
   -4.1016    7.1614   -0.0000 H   0  0  0  0  0  0
   -1.3637    7.3935    1.3390 H   0  0  0  0  0  0
   -2.9019    7.2950    2.1535 H   0  0  0  0  0  0
   -3.2481    5.0050    1.3986 H   0  0  0  0  0  0
   -1.6751    5.1107    2.1592 H   0  0  0  0  0  0
    2.1319   -2.8244   -0.0000 C   0  0  0  0  0  0
    2.5100   -1.3646   -0.0000 C   0  0  0  0  0  0
    3.8990   -1.1432   -0.0000 C   0  0  0  0  0  0
    4.4178    0.1418    0.0000 C   0  0  0  0  0  0
    3.5161    1.1877    0.0001 C   0  0  0  0  0  0
    2.1809    0.9807    0.0001 N   0  0  0  0  0  0
    1.6098   -0.2508    0.0000 C   0  0  0  0  0  0
    2.9967   -3.4900   -0.0000 H   0  0  0  0  0  0
    1.5805   -3.0559   -0.9101 H   0  0  0  0  0  0
    1.5805   -3.0559    0.9101 H   0  0  0  0  0  0
    4.5942   -1.9707   -0.0000 H   0  0  0  0  0  0
    5.4833    0.3180    0.0000 H   0  0  0  0  0  0
    3.8503    2.2147    0.0001 H   0  0  0  0  0  0
  1  2  2  0  0  0
  1  6  1  0  0  0
  1 19  1  0  0  0
  2  3  1  0  0  0
  2  9  1  0  0  0
  3  4  2  0  0  0
  3  7  1  0  0  0
  4  5  1  0  0  0
  4 20  1  0  0  0
  5  6  2  0  0  0
  5 21  1  0  0  0
  6 22  1  0  0  0
  7  8  2  0  0  0
  7 42  1  0  0  0
  8  9  1  0  0  0
  8 10  1  0  0  0
  9 23  1  0  0  0
 10 11  1  0  0  0
 10 12  2  0  0  0
 11 13  1  0  0  0
 11 24  1  0  0  0
 13 18  1  0  0  0
 13 14  1  0  0  0
 13 25  1  0  0  0
 14 15  1  0  0  0
 14 26  1  0  0  0
 14 27  1  0  0  0
 15 16  1  0  0  0
 15 28  1  0  0  0
 15 29  1  0  0  0
 16 17  1  0  0  0
 16 30  1  0  0  0
 16 31  1  0  0  0
 17 18  1  0  0  0
 17 32  1  0  0  0
 17 33  1  0  0  0
 18 34  1  0  0  0
 18 35  1  0  0  0
 36 37  1  0  0  0
 36 43  1  0  0  0
 36 44  1  0  0  0
 36 45  1  0  0  0
 37 42  1  0  0  0
 37 38  2  0  0  0
 38 39  1  0  0  0
 38 46  1  0  0  0
 39 40  2  0  0  0
 39 47  1  0  0  0
 40 41  1  0  0  0
 40 48  1  0  0  0
 41 42  2  0  0  0
M  END
> <s_m_entry_id>
8088

> <s_m_entry_name>
entry

> <i_f3d_flags>
0

> <s_m_job_name>
adme_1000

> <r_psp_Prime_Energy>
-34111.7833064495

> <r_psp_Prime_Solv_GB>
-5188.23882559964

> <r_psp_Prime_Coulomb>
-26471.0056340611

> <r_psp_Prime_vdW>
-4047.29831805287

> <r_psp_Prime_Covalent>
4419.67930974384

> <i_psp_model_num>
0

> <r_psp_Prime_Lipo>
-2178.56019536946

> <s_psp_Prime_Energy_Force_Field>
S-OPLS

> <s_psp_Prime_Energy_Solvent_Model>
VSGB2.1

> <r_psp_Prime_Hbond>
-550.107109122677

> <r_psp_Prime_Packing>
-55.8446424272089

> <r_psp_Prime_SelfCont>
-40.4078915603482

> <r_psp_Memb1_x>
103.457542316003

> <r_psp_Memb1_y>
39.4731108300965

> <r_psp_Memb1_z>
48.7987221124676

> <r_psp_Memb2_x>
99.8134167309003

> <r_psp_Memb2_y>
2.81176945184187

> <r_psp_Memb2_z>
23.8404289603493

> <r_psp_MembDummyRadius>
4.45

> <r_psp_Prime_Bond_Covalent>
467.907165892779

> <r_psp_Prime_Bond_SGB>
49972.5835207183

> <r_psp_Prime_Angle_Covalent>
2225.31605112684

> <r_psp_Prime_Angle_SGB>
-21653.1578600274

> <r_psp_Prime_Torsion_Covalent>
1726.45609272422

> <r_psp_Prime_NB14_LJ>
4248.23423201707

> <r_psp_Prime_NB14_Lipo>
0

> <r_psp_Prime_NB14_Elec>
25579.8366889496

> <r_psp_Prime_NB14_SGB>
-15630.5261800357

> <r_psp_Prime_NBShort_LJ>
-7880.33609901605

> <r_psp_Prime_NBShort_Lipo>
-2178.56019536946

> <r_psp_Prime_NBShort_Elec>
-53068.5481732928

> <r_psp_Prime_NBShort_SGB>
18032.237888778

> <r_psp_Prime_NBLong_LJ>
-415.196451053895

> <r_psp_Prime_NBLong_Lipo>
0

> <r_psp_Prime_NBLong_Elec>
1017.7058502821

> <r_psp_Prime_NBLong_SGB>
-1166.6594034063

> <r_psp_Prime_Self_SGB>
-34742.7167916265

> <s_m_Source_Path>
F:\Dekstop_files\DAC4,5\Molecular Systems Desgn and Engineering\supplementary_str

> <s_m_Source_File>
1000_str.mae

> <i_m_Source_File_Index>
867

> <i_lp_mmshare_version>
53156

> <s_epik_input>
W0NIM11jMVtjSF1bY0hdW2NIXW5jMS1jKGMoYzIzKVtjSF1bY0hdW2NIXVtjSF0yKWMoW25IXTMpQyg9TylbTkhdW0NIXTRbQ0gyXVtDSDJdW0NIMl1bQ0gyXVtDSDJdNA==

> <s_epik_cmdline>
J2VwaWtfcHl0aG9uJywgJy1waHQnLCAnMC4wJywgJy1waCcsICc3LjAnLCAnLXRuJywgJzgnLCAnLW1hJywgJzUwMCcsICctaW1hZScsICc8aW5maWxlLm1hZT4nLCAnLW9tYWUnLCAnPG91dGZpbGUubWFlPic=

> <r_lp_tautomer_probability>
1

> <r_epik_Ionization_Penalty>
  0.0043

> <r_epik_Ionization_Penalty_Charging>
  0.0000

> <r_epik_Ionization_Penalty_Neutral>
  0.0043

> <r_epik_State_Penalty>
  0.0000

> <r_epik_Charging_Adjusted_Penalty>
0

> <i_epik_Tot_Q>
0

> <i_epik_Tot_abs_Q>
0

> <s_lp_Force_Field>
S-OPLS

> <r_lp_Energy>
73.041382

> <b_lp_Chiralities_Consistent>
1

> <s_lp_Variant>
ind_1,490699-1

> <s_i_glide_gridfile>
glide-grid_mmpl3

> <i_i_glide_lignum>
631

> <i_i_glide_rotatable_bonds>
4

> <r_i_docking_score>
-9.4973183250938

> <r_i_glide_ligand_efficiency>
-0.379892733003752

> <r_i_glide_ligand_efficiency_sa>
-1.11081308872928

> <r_i_glide_ligand_efficiency_ln>
-2.25114905471068

> <r_i_glide_gscore>
-9.4973183250938

> <r_i_glide_evdw>
-40.6480026245117

> <r_i_glide_ecoul>
-1.32116031646729

> <r_i_glide_energy>
-41.969162940979

> <r_i_glide_einternal>
3.11787581443787

> <r_i_glide_emodel>
-57.6508634242365

> <i_i_glide_confnum>
71

> <i_i_glide_posenum>
365

> <r_i_glide_eff_state_penalty>
0

> <i_rge_num_r_groups>
1

> <r_rge_occupation_R1>
1

> <s_rge_R1>
490699

> <s_rge_R1_s_m_title>
490699

> <s_rge_R1_s_m_entry_id>
16452

> <s_rge_R1_s_m_entry_name>
eMol_BB_r-groups.252

> <s_rge_R1_s_m_smiles>
[*]c1c(C)cccn1

> <b_rge_R1_b_sd_chiral_flag>
0

> <i_rge_R1_i_sd_version>
0

> <s_rge_R1_s_m_Source_File>
eMol_BB_r-groups-dedup.mae

> <i_rge_R1_i_m_Source_File_Index>
179

> <s_rge_R1_s_m_Source_Path>
/Users/konze/projects/pathfinder/r-groups

> <s_rge_R1_s_sd_Source_Path>
/Users/konze/projects/pathfinder/reactant sets/eMolecules

> <s_rge_R1_s_sd_Source_File>
eMol BB r-groups.mae

> <i_rge_R1_i_sd_Source_File_Index>
252

> <r_rge_R1_r_sd_MW>
93.1265

> <i_rge_R1_i_sd_RB>
0

> <i_rge_R1_i_sd_HeavyAtomCount>
7

> <i_rge_R1_i_sd_HBA>
1

> <i_rge_R1_i_sd_HBD>
0

> <r_rge_R1_r_sd_PSA>
12.89

> <i_rge_R1_i_sd_ChiralCenterCount>
0

> <i_rge_R1_i_sd_ChiralCenterCountAllPossible>
0

> <i_rge_R1_i_sd_RingCount>
1

> <r_rge_R1_r_sd_AlogP>
1.1656

> <s_rge_R1_s_sd_subgroup_title>
eMol BB r-groups

> <s_rge_R1_s_sd_subgroupid>
eMol BB r-groups

> <i_rge_R1_i_sd_subgroup_collapsed>
0

> <s_rge_R1_s_sd_Unique_SMILES_Stereo>
Cc1cccnc1

> <i_rge_R1_i_sd_canvasUID>
197

> <s_rge_R1_s_canvas_Unique_SMILES_Stereo>
Cc1cccnc1

> <s_psp_Prime_MMGBSA_Input_Structure_Hash>
1ed32b87700bd77bd46c7151e8c135c70d368d30f75009be84355ef0

> <i_psp_number_heavy_atoms>
25

> <r_psp_MMGBSA_dG_Bind>
-40.85538256984

> <r_psp_MMGBSA_dG_Bind_Coulomb>
-4.42479541843204

> <r_psp_MMGBSA_dG_Bind_Covalent>
4.71650623693313

> <r_psp_MMGBSA_dG_Bind_Hbond>
-0.00950403949570955

> <r_psp_MMGBSA_dG_Bind_Lipo>
-25.9485745615689

> <r_psp_MMGBSA_dG_Bind_Packing>
4.9737991503207e-014

> <r_psp_MMGBSA_dG_Bind_SelfCont>
7.105427357601e-015

> <r_psp_MMGBSA_dG_Bind_Solv_GB>
28.9534966282299

> <r_psp_MMGBSA_dG_Bind_vdW>
-44.1425114154131

> <r_psp_Lig_Strain_Energy>
7.63955623588032

> <r_psp_Lig_Strain_Coulomb>
2.08035742093081

> <r_psp_Lig_Strain_Covalent>
4.71670710504636

> <r_psp_Lig_Strain_Hbond>
0

> <r_psp_Lig_Strain_Lipo>
0.226709673343605

> <r_psp_Lig_Strain_Packing>
0

> <r_psp_Lig_Strain_SelfCont>
0

> <r_psp_Lig_Strain_Solv_GB>
-0.634059046019459

> <r_psp_Lig_Strain_vdW>
1.24984108257902

> <r_psp_Ligand_Energy>
24.3231168541515

> <r_psp_Ligand_Coulomb>
-7.66502469968966

> <r_psp_Ligand_Covalent>
24.5562776855019

> <r_psp_Ligand_Hbond>
0

> <r_psp_Ligand_Lipo>
-2.08698847041128

> <r_psp_Ligand_Packing>
0

> <r_psp_Ligand_SelfCont>
0

> <r_psp_Ligand_Solv_GB>
-10.6405418652815

> <r_psp_Ligand_vdW>
20.159394204032

> <r_psp_Complex_Energy>
-34111.7833064495

> <r_psp_Complex_Coulomb>
-26471.0056340611

> <r_psp_Complex_Covalent>
4419.67930974384

> <r_psp_Complex_Hbond>
-550.107109122677

> <r_psp_Complex_Lipo>
-2178.56019536946

> <r_psp_Complex_Packing>
-55.8446424272089

> <r_psp_Complex_SelfCont>
-40.4078915603482

> <r_psp_Complex_Solv_GB>
-5188.23882559964

> <r_psp_Complex_vdW>
-4047.29831805287

> <r_psp_Receptor_Energy>
-34095.2510407338

> <r_psp_Receptor_Coulomb>
-26458.915813943

> <r_psp_Receptor_Covalent>
4390.40652582141

> <r_psp_Receptor_Hbond>
-550.097605083181

> <r_psp_Receptor_Lipo>
-2150.52463233748

> <r_psp_Receptor_Packing>
-55.8446424272089

> <r_psp_Receptor_SelfCont>
-40.4078915603482

> <r_psp_Receptor_Solv_GB>
-5206.55178036259

> <r_psp_Receptor_vdW>
-4023.31520084149

> <r_psp_MMGBSA_dG_Bind(NS)>
-48.4949388056702

> <r_psp_MMGBSA_dG_Bind(NS)_Coulomb>
-6.50515283940331

> <r_psp_MMGBSA_dG_Bind(NS)_Covalent>
-0.000200868112187891

> <r_psp_MMGBSA_dG_Bind(NS)_Hbond>
-0.00950403949548217

> <r_psp_MMGBSA_dG_Bind(NS)_Lipo>
-26.1752842349074

> <r_psp_MMGBSA_dG_Bind(NS)_Packing>
0

> <r_psp_MMGBSA_dG_Bind(NS)_SelfCont>
0

> <r_psp_MMGBSA_dG_Bind(NS)_Solv_GB>
29.5875556742512

> <r_psp_MMGBSA_dG_Bind(NS)_vdW>
-45.3923524979964

> <r_psp_Rec_Strain_Energy>
-5.0931703299284e-011

> <r_psp_Rec_Strain_Coulomb>
4.00177668780088e-011

> <r_psp_Rec_Strain_Covalent>
-9.09494701772928e-013

> <r_psp_Rec_Strain_Hbond>
-2.27373675443232e-013

> <r_psp_Rec_Strain_Lipo>
-5.00222085975111e-012

> <r_psp_Rec_Strain_Packing>
4.9737991503207e-014

> <r_psp_Rec_Strain_SelfCont>
7.105427357601e-015

> <r_psp_Rec_Strain_Solv_GB>
-1.81898940354586e-012

> <r_psp_Rec_Strain_vdW>
4.54747350886464e-012

> <r_psp_Prime_MMGBSA_ligand_efficiency>
-1.6342153027936

> <r_psp_Prime_MMGBSA_ligand_efficiency_sa>
-2.4513229541904

> <r_psp_Prime_MMGBSA_ligand_efficiency_ln>
-9.68395000606977

> <r_i_glide_lipo>
-5.66277334008316

> <r_i_glide_hbond>
0

> <r_i_glide_metal>
0

> <r_i_glide_rewards>
-2.28209581915775

> <r_i_glide_erotb>
0.678125012842797

> <r_i_glide_esite>
0

> <i_psp_ExecuteFunction_Internal_Entry_Index>
51

> <i_qp_#stars>
0

> <i_qp_#amine>
0

> <i_qp_#amidine>
0

> <i_qp_#acid>
0

> <i_qp_#amide>
0

> <i_qp_#rotor>
2

> <i_qp_#rtvFG>
0

> <i_qp_CNS>
0

> <r_qp_mol_MW>
   333.432

> <r_qp_dipole>
     4.903

> <r_qp_SASA>
   644.353

> <r_qp_FOSA>
   299.433

> <r_qp_FISA>
    46.499

> <r_qp_PISA>
   298.421

> <r_qp_WPSA>
     0.000

> <r_qp_volume>
  1126.923

> <r_qp_donorHB>
     2.000

> <r_qp_accptHB>
     3.500

> <r_qp_dip^2/V>
   0.0213336

> <r_qp_ACxDN^.5/SA>
   0.0076817

> <r_qp_glob>
   0.8127763

> <r_qp_QPpolrz>
    40.511

> <r_qp_QPlogPC16>
    11.559

> <r_qp_QPlogPoct>
    18.142

> <r_qp_QPlogPw>
     9.552

> <r_qp_QPlogPo/w>
     4.711

> <r_qp_QPlogS>
    -6.234

> <r_qp_CIQPlogS>
    -5.353

> <r_qp_QPlogHERG>
    -5.985

> <r_qp_QPPCaco>
  3588.835

> <r_qp_QPlogBB>
    -0.026

> <r_qp_QPPMDCK>
  1968.743

> <r_qp_QPlogKp>
    -1.133

> <r_qp_IP(eV)>
     8.181

> <r_qp_EA(eV)>
     0.601

> <i_qp_#metab>
2

> <r_qp_QPlogKhsa>
     0.832

> <i_qp_HumanOralAbsorption>
1

> <r_qp_PercentHumanOralAbsorption>
   100.000

> <r_qp_SAfluorine>
     0.000

> <r_qp_SAamideO>
     0.000

> <r_qp_PSA>
    52.198

> <i_qp_#NandO>
4

> <i_qp_RuleOfFive>
0

> <i_qp_RuleOfThree>
1

> <i_qp_#ringatoms>
21

> <i_qp_#in34>
0

> <i_qp_#in56>
21

> <i_qp_#noncon>
6

> <i_qp_#nonHatm>
25

> <r_qp_Jm>
0.0143106478469308

> <s_m_subgroupid>
100str_copy1

> <s_m_subgroup_title>
100str

> <b_m_subgroup_collapsed>
0

$$$$
ind_1,490752
                    3D
 Structure written by MMmdl.
 50 53  0  0  1  0            999 V2000
   -3.3002   -1.7007    0.8401 C   0  0  0  0  0  0
   -2.2791   -0.7661    0.6350 C   0  0  0  0  0  0
   -0.9358   -1.1509    0.3577 C   0  0  0  0  0  0
   -0.6321   -2.5207    0.2761 C   0  0  0  0  0  0
   -1.6483   -3.4533    0.4771 C   0  0  0  0  0  0
   -2.9514   -3.0487    0.7545 C   0  0  0  0  0  0
   -0.1758    0.0635    0.2202 C   0  0  0  0  0  0
   -1.0498    1.1363    0.3759 C   0  0  0  0  0  0
   -2.2984    0.6116    0.6451 N   0  0  0  0  0  0
   -0.7446    2.5506    0.3515 C   0  0  0  0  0  0
   -1.8176    3.3674    0.3276 N   0  0  0  0  0  0
    0.4198    2.9533    0.3644 O   0  0  0  0  0  0
   -1.7792    4.8310    0.2943 C   0  0  0  0  0  0
   -1.2341    5.4442   -1.0238 C   0  0  0  0  0  0
   -1.2556    6.9854   -1.0443 C   0  0  0  0  0  0
   -2.6312    7.5558   -0.6630 C   0  0  0  0  0  0
   -3.0983    7.0193    0.6996 C   0  0  0  0  0  0
   -3.1106    5.4786    0.7465 C   0  0  0  0  0  0
   -4.3160   -1.4015    1.0528 H   0  0  0  0  0  0
    0.3721   -2.8533    0.0589 H   0  0  0  0  0  0
   -1.4216   -4.5077    0.4164 H   0  0  0  0  0  0
   -3.7129   -3.8001    0.9051 H   0  0  0  0  0  0
   -3.0983    1.2022    0.8197 H   0  0  0  0  0  0
   -2.7294    2.9508    0.2130 H   0  0  0  0  0  0
   -1.0644    5.1306    1.0653 H   0  0  0  0  0  0
   -0.2155    5.1026   -1.2126 H   0  0  0  0  0  0
   -1.8441    5.0883   -1.8557 H   0  0  0  0  0  0
   -0.5033    7.3648   -0.3508 H   0  0  0  0  0  0
   -0.9650    7.3461   -2.0318 H   0  0  0  0  0  0
   -2.5882    8.6454   -0.6386 H   0  0  0  0  0  0
   -3.3620    7.2957   -1.4306 H   0  0  0  0  0  0
   -2.4401    7.3989    1.4827 H   0  0  0  0  0  0
   -4.0928    7.4045    0.9285 H   0  0  0  0  0  0
   -3.9108    5.1325    0.0901 H   0  0  0  0  0  0
   -3.3662    5.1517    1.7556 H   0  0  0  0  0  0
    1.1645    0.1588   -0.0455 O   0  0  0  0  0  0
    1.9886   -0.3173    1.0126 C   0  0  0  0  0  0
    3.4588   -0.0197    0.6633 C   0  0  0  0  0  0
    4.0243   -0.8021   -0.5351 C   0  0  0  0  0  0
    3.9347    1.4013    0.8618 C   0  0  0  0  0  0
    4.3953    0.3050    1.8048 C   0  0  0  0  0  0
    1.7090    0.1707    1.9500 H   0  0  0  0  0  0
    1.8572   -1.3896    1.1627 H   0  0  0  0  0  0
    5.0651   -0.5452   -0.7369 H   0  0  0  0  0  0
    3.4559   -0.5930   -1.4416 H   0  0  0  0  0  0
    3.9820   -1.8764   -0.3538 H   0  0  0  0  0  0
    4.6439    1.8213    0.1479 H   0  0  0  0  0  0
    3.2220    2.1463    1.2182 H   0  0  0  0  0  0
    4.0103    0.2875    2.8249 H   0  0  0  0  0  0
    5.4278   -0.0413    1.7504 H   0  0  0  0  0  0
  1  2  2  0  0  0
  1  6  1  0  0  0
  1 19  1  0  0  0
  2  3  1  0  0  0
  2  9  1  0  0  0
  3  4  2  0  0  0
  3  7  1  0  0  0
  4  5  1  0  0  0
  4 20  1  0  0  0
  5  6  2  0  0  0
  5 21  1  0  0  0
  6 22  1  0  0  0
  7  8  2  0  0  0
  7 36  1  0  0  0
  8  9  1  0  0  0
  8 10  1  0  0  0
  9 23  1  0  0  0
 10 11  1  0  0  0
 10 12  2  0  0  0
 11 13  1  0  0  0
 11 24  1  0  0  0
 13 18  1  0  0  0
 13 14  1  0  0  0
 13 25  1  0  0  0
 14 15  1  0  0  0
 14 26  1  0  0  0
 14 27  1  0  0  0
 15 16  1  0  0  0
 15 28  1  0  0  0
 15 29  1  0  0  0
 16 17  1  0  0  0
 16 30  1  0  0  0
 16 31  1  0  0  0
 17 18  1  0  0  0
 17 32  1  0  0  0
 17 33  1  0  0  0
 18 34  1  0  0  0
 18 35  1  0  0  0
 36 37  1  0  0  0
 37 38  1  0  0  0
 37 42  1  0  0  0
 37 43  1  0  0  0
 38 41  1  0  0  0
 38 39  1  0  0  0
 38 40  1  0  0  0
 39 44  1  0  0  0
 39 45  1  0  0  0
 39 46  1  0  0  0
 40 41  1  0  0  0
 40 47  1  0  0  0
 40 48  1  0  0  0
 41 49  1  0  0  0
 41 50  1  0  0  0
M  END
> <s_m_entry_id>
8111

> <s_m_entry_name>
entry

> <i_f3d_flags>
0

> <s_m_job_name>
adme_1000

> <r_psp_Prime_Energy>
-34111.1011654376

> <r_psp_Prime_Solv_GB>
-5185.75368239239

> <r_psp_Prime_Coulomb>
-26456.8188576264

> <r_psp_Prime_vdW>
-4057.06416380088

> <r_psp_Prime_Covalent>
4411.78715839328

> <i_psp_model_num>
0

> <r_psp_Prime_Lipo>
-2176.90114603161

> <s_psp_Prime_Energy_Force_Field>
S-OPLS

> <s_psp_Prime_Energy_Solvent_Model>
VSGB2.1

> <r_psp_Prime_Hbond>
-550.097939992007

> <r_psp_Prime_Packing>
-55.8446424272089

> <r_psp_Prime_SelfCont>
-40.4078915603482

> <r_psp_Memb1_x>
103.457542316003

> <r_psp_Memb1_y>
39.4731108300965

> <r_psp_Memb1_z>
48.7987221124676

> <r_psp_Memb2_x>
99.8134167309003

> <r_psp_Memb2_y>
2.81176945184187

> <r_psp_Memb2_z>
23.8404289603493

> <r_psp_MembDummyRadius>
4.45

> <r_psp_Prime_Bond_Covalent>
466.505976232431

> <r_psp_Prime_Bond_SGB>
49966.9979026811

> <r_psp_Prime_Angle_Covalent>
2220.68341348249

> <r_psp_Prime_Angle_SGB>
-21645.6201360762

> <r_psp_Prime_Torsion_Covalent>
1724.59776867836

> <r_psp_Prime_NB14_LJ>
4239.66166031949

> <r_psp_Prime_NB14_Lipo>
0

> <r_psp_Prime_NB14_Elec>
25582.2216998566

> <r_psp_Prime_NB14_SGB>
-15628.904550115

> <r_psp_Prime_NBShort_LJ>
-7881.84704894372

> <r_psp_Prime_NBShort_Lipo>
-2176.90114603161

> <r_psp_Prime_NBShort_Elec>
-53056.4364030337

> <r_psp_Prime_NBShort_SGB>
18022.8705008921

> <r_psp_Prime_NBLong_LJ>
-414.878775176638

> <r_psp_Prime_NBLong_Lipo>
0

> <r_psp_Prime_NBLong_Elec>
1017.39584555073

> <r_psp_Prime_NBLong_SGB>
-1161.51631510753

> <r_psp_Prime_Self_SGB>
-34739.5810846669

> <s_m_Source_Path>
F:\Dekstop_files\DAC4,5\Molecular Systems Desgn and Engineering\supplementary_str

> <s_m_Source_File>
1000_str.mae

> <i_m_Source_File_Index>
898

> <i_lp_mmshare_version>
53156

> <s_epik_input>
W2NIXTFbY0hdW2NIXVtjSF1jKGMxMiljKE9bQ0gyXUMzKFtDSDNdKVtDSDJdW0NIMl0zKWMoW25IXTIpQyg9TylbTkhdW0NIXTRbQ0gyXVtDSDJdW0NIMl1bQ0gyXVtDSDJdNA==

> <s_epik_cmdline>
J2VwaWtfcHl0aG9uJywgJy1waHQnLCAnMC4wJywgJy1waCcsICc3LjAnLCAnLXRuJywgJzgnLCAnLW1hJywgJzUwMCcsICctaW1hZScsICc8aW5maWxlLm1hZT4nLCAnLW9tYWUnLCAnPG91dGZpbGUubWFlPic=

> <r_lp_tautomer_probability>
1

> <r_epik_Ionization_Penalty>
  0.0000

> <r_epik_Ionization_Penalty_Charging>
  0.0000

> <r_epik_Ionization_Penalty_Neutral>
  0.0000

> <r_epik_State_Penalty>
  0.0000

> <r_epik_Charging_Adjusted_Penalty>
0

> <i_epik_Tot_Q>
0

> <i_epik_Tot_abs_Q>
0

> <s_lp_Force_Field>
S-OPLS

> <r_lp_Energy>
29.862928

> <b_lp_Chiralities_Consistent>
1

> <s_lp_Variant>
ind_1,490752-1

> <s_i_glide_gridfile>
glide-grid_mmpl3

> <i_i_glide_lignum>
1567

> <i_i_glide_rotatable_bonds>
6

> <r_i_docking_score>
-7.88862177533974

> <r_i_glide_ligand_efficiency>
-0.328692573972489

> <r_i_glide_ligand_efficiency_sa>
-0.948113446145732

> <r_i_glide_ligand_efficiency_ln>
-1.88810917610479

> <r_i_glide_gscore>
-7.88862177533974

> <r_i_glide_evdw>
-41.5869407653809

> <r_i_glide_ecoul>
-1.40294778347015

> <r_i_glide_energy>
-42.989888548851

> <r_i_glide_einternal>
6.19103956222534

> <r_i_glide_emodel>
-58.8502967545398

> <i_i_glide_confnum>
141

> <i_i_glide_posenum>
356

> <r_i_glide_eff_state_penalty>
0

> <i_rge_num_r_groups>
1

> <r_rge_occupation_R1>
1

> <s_rge_R1>
490752

> <s_rge_R1_s_m_title>
490752

> <s_rge_R1_s_m_entry_id>
17289

> <s_rge_R1_s_m_entry_name>
eMol_BB_r-groups.666

> <s_rge_R1_s_m_smiles>
[*]OCC1(C)CC1

> <b_rge_R1_b_sd_chiral_flag>
0

> <i_rge_R1_i_sd_version>
0

> <s_rge_R1_s_m_Source_File>
eMol_BB_r-groups-dedup.mae

> <i_rge_R1_i_m_Source_File_Index>
538

> <s_rge_R1_s_m_Source_Path>
/Users/konze/projects/pathfinder/r-groups

> <s_rge_R1_s_sd_Source_Path>
/Users/konze/projects/pathfinder/reactant sets/eMolecules

> <s_rge_R1_s_sd_Source_File>
eMol BB r-groups.mae

> <i_rge_R1_i_sd_Source_File_Index>
666

> <r_rge_R1_r_sd_MW>
86.1323

> <i_rge_R1_i_sd_RB>
1

> <i_rge_R1_i_sd_HeavyAtomCount>
6

> <i_rge_R1_i_sd_HBA>
1

> <i_rge_R1_i_sd_HBD>
1

> <r_rge_R1_r_sd_PSA>
20.23

> <i_rge_R1_i_sd_ChiralCenterCount>
0

> <i_rge_R1_i_sd_ChiralCenterCountAllPossible>
0

> <i_rge_R1_i_sd_RingCount>
1

> <r_rge_R1_r_sd_AlogP>
0.7359

> <s_rge_R1_s_sd_subgroup_title>
eMol BB r-groups

> <s_rge_R1_s_sd_subgroupid>
eMol BB r-groups

> <i_rge_R1_i_sd_subgroup_collapsed>
0

> <s_rge_R1_s_sd_Unique_SMILES_Stereo>
OCC1(C)CC1

> <i_rge_R1_i_sd_canvasUID>
607

> <s_rge_R1_s_canvas_Unique_SMILES_Stereo>
OCC1(C)CC1

> <s_psp_Prime_MMGBSA_Input_Structure_Hash>
0238ceeb4a756f34b851c182dea320e965d043699c978f823dda6129

> <i_psp_number_heavy_atoms>
24

> <r_psp_MMGBSA_dG_Bind>
-42.9546652987847

> <r_psp_MMGBSA_dG_Bind_Coulomb>
-6.35753518119236

> <r_psp_MMGBSA_dG_Bind_Covalent>
2.2356023905395

> <r_psp_MMGBSA_dG_Bind_Hbond>
-0.000334908825720959

> <r_psp_MMGBSA_dG_Bind_Lipo>
-24.3904590556081

> <r_psp_MMGBSA_dG_Bind_Packing>
4.9737991503207e-014

> <r_psp_MMGBSA_dG_Bind_SelfCont>
7.105427357601e-015

> <r_psp_MMGBSA_dG_Bind_Solv_GB>
30.1381117076671

> <r_psp_MMGBSA_dG_Bind_vdW>
-44.5800502512684

> <r_psp_Lig_Strain_Energy>
4.44151282373659

> <r_psp_Lig_Strain_Coulomb>
-0.0733923191658832

> <r_psp_Lig_Strain_Covalent>
2.23580325865169

> <r_psp_Lig_Strain_Hbond>
0

> <r_psp_Lig_Strain_Lipo>
-0.0310728475607305

> <r_psp_Lig_Strain_Packing>
0

> <r_psp_Lig_Strain_SelfCont>
0

> <r_psp_Lig_Strain_Solv_GB>
0.056310804885868

> <r_psp_Lig_Strain_vdW>
2.25386392692566

> <r_psp_Ligand_Energy>
27.1045405949993

> <r_psp_Ligand_Coulomb>
8.45449149778089

> <r_psp_Ligand_Covalent>
19.1450301813328

> <r_psp_Ligand_Hbond>
0

> <r_psp_Ligand_Lipo>
-1.9860546385254

> <r_psp_Ligand_Packing>
0

> <r_psp_Ligand_SelfCont>
0

> <r_psp_Ligand_Solv_GB>
-9.34001373747162

> <r_psp_Ligand_vdW>
10.8310872918826

> <r_psp_Complex_Energy>
-34111.1011654376

> <r_psp_Complex_Coulomb>
-26456.8188576264

> <r_psp_Complex_Covalent>
4411.78715839328

> <r_psp_Complex_Hbond>
-550.097939992007

> <r_psp_Complex_Lipo>
-2176.90114603161

> <r_psp_Complex_Packing>
-55.8446424272089

> <r_psp_Complex_SelfCont>
-40.4078915603482

> <r_psp_Complex_Solv_GB>
-5185.75368239239

> <r_psp_Complex_vdW>
-4057.06416380088

> <r_psp_Receptor_Energy>
-34095.2510407338

> <r_psp_Receptor_Coulomb>
-26458.915813943

> <r_psp_Receptor_Covalent>
4390.40652582141

> <r_psp_Receptor_Hbond>
-550.097605083181

> <r_psp_Receptor_Lipo>
-2150.52463233748

> <r_psp_Receptor_Packing>
-55.8446424272089

> <r_psp_Receptor_SelfCont>
-40.4078915603482

> <r_psp_Receptor_Solv_GB>
-5206.55178036259

> <r_psp_Receptor_vdW>
-4023.31520084149

> <r_psp_MMGBSA_dG_Bind(NS)>
-47.3961781224716

> <r_psp_MMGBSA_dG_Bind(NS)_Coulomb>
-6.2841428620668

> <r_psp_MMGBSA_dG_Bind(NS)_Covalent>
-0.000200868111278396

> <r_psp_MMGBSA_dG_Bind(NS)_Hbond>
-0.000334908825493585

> <r_psp_MMGBSA_dG_Bind(NS)_Lipo>
-24.359386208042

> <r_psp_MMGBSA_dG_Bind(NS)_Packing>
0

> <r_psp_MMGBSA_dG_Bind(NS)_SelfCont>
0

> <r_psp_MMGBSA_dG_Bind(NS)_Solv_GB>
30.0818009027826

> <r_psp_MMGBSA_dG_Bind(NS)_vdW>
-46.8339141781985

> <r_psp_Rec_Strain_Energy>
-5.0931703299284e-011

> <r_psp_Rec_Strain_Coulomb>
4.00177668780088e-011

> <r_psp_Rec_Strain_Covalent>
-9.09494701772928e-013

> <r_psp_Rec_Strain_Hbond>
-2.27373675443232e-013

> <r_psp_Rec_Strain_Lipo>
-5.00222085975111e-012

> <r_psp_Rec_Strain_Packing>
4.9737991503207e-014

> <r_psp_Rec_Strain_SelfCont>
7.105427357601e-015

> <r_psp_Rec_Strain_Solv_GB>
-1.81898940354586e-012

> <r_psp_Rec_Strain_vdW>
4.54747350886464e-012

> <r_psp_Prime_MMGBSA_ligand_efficiency>
-1.78977772078269

> <r_psp_Prime_MMGBSA_ligand_efficiency_sa>
-2.68466658117404

> <r_psp_Prime_MMGBSA_ligand_efficiency_ln>
-10.2810224671537

> <r_i_glide_lipo>
-4.72030724691748

> <r_i_glide_hbond>
0

> <r_i_glide_metal>
0

> <r_i_glide_rewards>
-1.93454817960101

> <r_i_glide_erotb>
1.05602285696832

> <r_i_glide_esite>
0

> <i_psp_ExecuteFunction_Internal_Entry_Index>
1964

> <i_qp_#stars>
0

> <i_qp_#amine>
0

> <i_qp_#amidine>
0

> <i_qp_#acid>
0

> <i_qp_#amide>
0

> <i_qp_#rotor>
5

> <i_qp_#rtvFG>
0

> <i_qp_CNS>
0

> <r_qp_mol_MW>
   326.438

> <r_qp_dipole>
     6.580

> <r_qp_SASA>
   657.572

> <r_qp_FOSA>
   439.945

> <r_qp_FISA>
    44.621

> <r_qp_PISA>
   173.006

> <r_qp_WPSA>
     0.000

> <r_qp_volume>
  1149.342

> <r_qp_donorHB>
     2.000

> <r_qp_accptHB>
     3.250

> <r_qp_dip^2/V>
   0.0376689

> <r_qp_ACxDN^.5/SA>
   0.0069896

> <r_qp_glob>
   0.8069644

> <r_qp_QPpolrz>
    38.284

> <r_qp_QPlogPC16>
    10.880

> <r_qp_QPlogPoct>
    17.121

> <r_qp_QPlogPw>
     7.810

> <r_qp_QPlogPo/w>
     4.815

> <r_qp_QPlogS>
    -6.058

> <r_qp_CIQPlogS>
    -4.747

> <r_qp_QPlogHERG>
    -5.481

> <r_qp_QPPCaco>
  3739.051

> <r_qp_QPlogBB>
    -0.195

> <r_qp_QPPMDCK>
  2057.961

> <r_qp_QPlogKp>
    -1.252

> <r_qp_IP(eV)>
     8.384

> <r_qp_EA(eV)>
     0.467

> <i_qp_#metab>
1

> <r_qp_QPlogKhsa>
     0.806

> <i_qp_HumanOralAbsorption>
3

> <r_qp_PercentHumanOralAbsorption>
   100.000

> <r_qp_SAfluorine>
     0.000

> <r_qp_SAamideO>
     0.000

> <r_qp_PSA>
    57.322

> <i_qp_#NandO>
4

> <i_qp_RuleOfFive>
0

> <i_qp_RuleOfThree>
1

> <i_qp_#ringatoms>
18

> <i_qp_#in34>
3

> <i_qp_#in56>
15

> <i_qp_#noncon>
9

> <i_qp_#nonHatm>
24

> <r_qp_Jm>
0.0159755453457023

> <s_m_subgroupid>
100str_copy1

> <s_m_subgroup_title>
100str

> <b_m_subgroup_collapsed>
0

$$$$
ind_1,491019
                    3D
 Structure written by MMmdl.
 53 55  0  0  1  0            999 V2000
   -1.0185    5.0616   -0.0135 C   0  0  0  0  0  0
   -1.2086    3.6754   -0.0150 C   0  0  0  0  0  0
   -0.1267    2.7455   -0.0192 C   0  0  0  0  0  0
    1.1840    3.2643   -0.0252 C   0  0  0  0  0  0
    1.3770    4.6442   -0.0250 C   0  0  0  0  0  0
    0.2973    5.5208   -0.0185 C   0  0  0  0  0  0
   -0.7118    1.4191   -0.0160 C   0  0  0  0  0  0
   -2.1025    1.5796   -0.0163 C   0  0  0  0  0  0
   -2.3655    2.9338   -0.0140 N   0  0  0  0  0  0
   -3.1385    0.5593   -0.0175 C   0  0  0  0  0  0
   -4.4050    1.0249   -0.0066 N   0  0  0  0  0  0
   -2.8554   -0.6400   -0.0269 O   0  0  0  0  0  0
   -5.6280    0.2180   -0.0045 C   0  0  0  0  0  0
   -6.4739    0.4184    1.2775 C   0  0  0  0  0  0
   -7.8068   -0.3564    1.2669 C   0  0  0  0  0  0
   -8.6294   -0.0786   -0.0015 C   0  0  0  0  0  0
   -7.8090   -0.3617   -1.2703 C   0  0  0  0  0  0
   -6.4757    0.4123   -1.2864 C   0  0  0  0  0  0
   -1.8479    5.7537   -0.0091 H   0  0  0  0  0  0
    2.0461    2.6168   -0.0308 H   0  0  0  0  0  0
    2.3819    5.0408   -0.0301 H   0  0  0  0  0  0
    0.4843    6.5847   -0.0179 H   0  0  0  0  0  0
   -3.3089    3.2925   -0.0121 H   0  0  0  0  0  0
   -4.5439    2.0242   -0.0006 H   0  0  0  0  0  0
   -5.3567   -0.8408   -0.0018 H   0  0  0  0  0  0
   -5.8956    0.1251    2.1550 H   0  0  0  0  0  0
   -6.7010    1.4795    1.3929 H   0  0  0  0  0  0
   -7.6024   -1.4260    1.3378 H   0  0  0  0  0  0
   -8.3915   -0.1012    2.1516 H   0  0  0  0  0  0
   -9.5338   -0.6882    0.0006 H   0  0  0  0  0  0
   -8.9613    0.9608   -0.0033 H   0  0  0  0  0  0
   -7.6055   -1.4315   -1.3375 H   0  0  0  0  0  0
   -8.3953   -0.1093   -2.1548 H   0  0  0  0  0  0
   -6.7027    1.4732   -1.4066 H   0  0  0  0  0  0
   -5.8989    0.1147   -2.1633 H   0  0  0  0  0  0
   -0.0054    0.2358   -0.0129 N   0  0  0  0  0  0
    1.4338    0.0345    0.0569 C   0  0  0  0  0  0
    1.8487   -1.4539    0.1160 C   0  0  2  0  0  0
    1.2719   -2.1682    1.3598 C   0  0  0  0  0  0
    3.3891   -1.5832    0.0327 C   0  0  0  0  0  0
    3.9056   -3.0196   -0.1527 C   0  0  0  0  0  0
    1.4334   -1.9433   -0.7672 H   0  0  0  0  0  0
   -0.5097   -0.6397   -0.0343 H   0  0  0  0  0  0
    1.8768    0.4943   -0.8272 H   0  0  0  0  0  0
    1.8212    0.5540    0.9341 H   0  0  0  0  0  0
    1.6652   -1.7396    2.2825 H   0  0  0  0  0  0
    1.5075   -3.2320    1.3609 H   0  0  0  0  0  0
    0.1849   -2.0915    1.3992 H   0  0  0  0  0  0
    3.7547   -0.9865   -0.8047 H   0  0  0  0  0  0
    3.8447   -1.1495    0.9243 H   0  0  0  0  0  0
    4.9875   -3.0256   -0.2874 H   0  0  0  0  0  0
    3.4620   -3.4900   -1.0309 H   0  0  0  0  0  0
    3.6850   -3.6451    0.7121 H   0  0  0  0  0  0
  1  2  2  0  0  0
  1  6  1  0  0  0
  1 19  1  0  0  0
  2  3  1  0  0  0
  2  9  1  0  0  0
  3  4  2  0  0  0
  3  7  1  0  0  0
  4  5  1  0  0  0
  4 20  1  0  0  0
  5  6  2  0  0  0
  5 21  1  0  0  0
  6 22  1  0  0  0
  7  8  2  0  0  0
  7 36  1  0  0  0
  8  9  1  0  0  0
  8 10  1  0  0  0
  9 23  1  0  0  0
 10 11  1  0  0  0
 10 12  2  0  0  0
 11 13  1  0  0  0
 11 24  1  0  0  0
 13 18  1  0  0  0
 13 14  1  0  0  0
 13 25  1  0  0  0
 14 15  1  0  0  0
 14 26  1  0  0  0
 14 27  1  0  0  0
 15 16  1  0  0  0
 15 28  1  0  0  0
 15 29  1  0  0  0
 16 17  1  0  0  0
 16 30  1  0  0  0
 16 31  1  0  0  0
 17 18  1  0  0  0
 17 32  1  0  0  0
 17 33  1  0  0  0
 18 34  1  0  0  0
 18 35  1  0  0  0
 36 37  1  0  0  0
 36 43  1  0  0  0
 37 38  1  0  0  0
 37 44  1  0  0  0
 37 45  1  0  0  0
 38 39  1  0  0  0
 38 40  1  0  0  0
 38 42  1  0  0  0
 39 46  1  0  0  0
 39 47  1  0  0  0
 39 48  1  0  0  0
 40 41  1  0  0  0
 40 49  1  0  0  0
 40 50  1  0  0  0
 41 51  1  0  0  0
 41 52  1  0  0  0
 41 53  1  0  0  0
M  END
> <s_m_entry_id>
8100

> <s_m_entry_name>
entry

> <i_f3d_flags>
0

> <s_m_job_name>
adme_1000

> <r_psp_Prime_Energy>
-34109.4564642347

> <r_psp_Prime_Solv_GB>
-5187.99466267054

> <r_psp_Prime_Coulomb>
-26462.0517398036

> <r_psp_Prime_vdW>
-4053.44660689585

> <r_psp_Prime_Covalent>
4418.34642668448

> <i_psp_model_num>
0

> <r_psp_Prime_Lipo>
-2177.94838859281

> <s_psp_Prime_Energy_Force_Field>
S-OPLS

> <s_psp_Prime_Energy_Solvent_Model>
VSGB2.1

> <r_psp_Prime_Hbond>
-550.108958968819

> <r_psp_Prime_Packing>
-55.8446424272089

> <r_psp_Prime_SelfCont>
-40.4078915603482

> <r_psp_Memb1_x>
103.457542316003

> <r_psp_Memb1_y>
39.4731108300965

> <r_psp_Memb1_z>
48.7987221124676

> <r_psp_Memb2_x>
99.8134167309003

> <r_psp_Memb2_y>
2.81176945184187

> <r_psp_Memb2_z>
23.8404289603493

> <r_psp_MembDummyRadius>
4.45

> <r_psp_Prime_Bond_Covalent>
467.21243413428

> <r_psp_Prime_Bond_SGB>
49964.8058125107

> <r_psp_Prime_Angle_Covalent>
2222.97695788165

> <r_psp_Prime_Angle_SGB>
-21647.9381044205

> <r_psp_Prime_Torsion_Covalent>
1728.15703466856

> <r_psp_Prime_NB14_LJ>
4241.4386208066

> <r_psp_Prime_NB14_Lipo>
0

> <r_psp_Prime_NB14_Elec>
25573.3799758984

> <r_psp_Prime_NB14_SGB>
-15623.2156111065

> <r_psp_Prime_NBShort_LJ>
-7879.75935233846

> <r_psp_Prime_NBShort_Lipo>
-2177.94838859281

> <r_psp_Prime_NBShort_Elec>
-53053.1330638495

> <r_psp_Prime_NBShort_SGB>
18019.611627537

> <r_psp_Prime_NBLong_LJ>
-415.125875363989

> <r_psp_Prime_NBLong_Lipo>
0

> <r_psp_Prime_NBLong_Elec>
1017.7013481476

> <r_psp_Prime_NBLong_SGB>
-1163.4515768354

> <r_psp_Prime_Self_SGB>
-34737.8068103558

> <s_m_Source_Path>
F:\Dekstop_files\DAC4,5\Molecular Systems Desgn and Engineering\supplementary_str

> <s_m_Source_File>
1000_str.mae

> <i_m_Source_File_Index>
878

> <i_lp_mmshare_version>
53156

> <s_epik_input>
W2NIXTFbY0hdW2NIXVtjSF1jKGMxMiljKFtOSF1bQ0gyXVtDQEhdKFtDSDNdKVtDSDJdW0NIM10pYyhbbkhdMilDKD1PKVtOSF1bQ0hdM1tDSDJdW0NIMl1bQ0gyXVtDSDJdW0NIMl0z

> <s_epik_cmdline>
J2VwaWtfcHl0aG9uJywgJy1waHQnLCAnMC4wJywgJy1waCcsICc3LjAnLCAnLXRuJywgJzgnLCAnLW1hJywgJzUwMCcsICctaW1hZScsICc8aW5maWxlLm1hZT4nLCAnLW9tYWUnLCAnPG91dGZpbGUubWFlPic=

> <r_lp_tautomer_probability>
1

> <r_epik_Ionization_Penalty>
  0.0000

> <r_epik_Ionization_Penalty_Charging>
  0.0000

> <r_epik_Ionization_Penalty_Neutral>
  0.0000

> <r_epik_State_Penalty>
  0.0000

> <r_epik_Charging_Adjusted_Penalty>
0

> <i_epik_Tot_Q>
0

> <i_epik_Tot_abs_Q>
0

> <s_lp_Force_Field>
S-OPLS

> <r_lp_Energy>
37.163791

> <b_lp_Chiralities_Consistent>
1

> <s_lp_Variant>
ind_1,491019-1

> <s_i_glide_gridfile>
glide-grid_mmpl3

> <i_i_glide_lignum>
2286

> <i_i_glide_rotatable_bonds>
7

> <r_i_docking_score>
-7.49127419709154

> <r_i_glide_ligand_efficiency>
-0.312136424878814

> <r_i_glide_ligand_efficiency_sa>
-0.900357248363726

> <r_i_glide_ligand_efficiency_ln>
-1.79300566753772

> <r_i_glide_gscore>
-7.49127419709154

> <r_i_glide_evdw>
-40.2004127502441

> <r_i_glide_ecoul>
-0.809924960136414

> <r_i_glide_energy>
-41.0103377103806

> <r_i_glide_einternal>
1.89794027805328

> <r_i_glide_emodel>
-58.2881200210842

> <i_i_glide_confnum>
124

> <i_i_glide_posenum>
183

> <r_i_glide_eff_state_penalty>
0

> <i_rge_num_r_groups>
1

> <r_rge_occupation_R1>
1

> <s_rge_R1>
491019

> <s_rge_R1_s_m_title>
491019

> <s_rge_R1_s_m_entry_id>
17866

> <s_rge_R1_s_m_entry_name>
eMol_BB_r-groups.944

> <s_rge_R1_s_m_smiles>
[*]NCC(C)CC

> <b_rge_R1_b_sd_chiral_flag>
0

> <i_rge_R1_i_sd_version>
0

> <s_rge_R1_s_m_Source_File>
eMol_BB_r-groups-dedup.mae

> <i_rge_R1_i_m_Source_File_Index>
779

> <s_rge_R1_s_m_Source_Path>
/Users/konze/projects/pathfinder/r-groups

> <s_rge_R1_s_sd_Source_Path>
/Users/konze/projects/pathfinder/reactant sets/eMolecules

> <s_rge_R1_s_sd_Source_File>
eMol BB r-groups.mae

> <i_rge_R1_i_sd_Source_File_Index>
944

> <r_rge_R1_r_sd_MW>
87.1634

> <i_rge_R1_i_sd_RB>
2

> <i_rge_R1_i_sd_HeavyAtomCount>
6

> <i_rge_R1_i_sd_HBA>
0

> <i_rge_R1_i_sd_HBD>
0

> <r_rge_R1_r_sd_PSA>
26.02

> <i_rge_R1_i_sd_ChiralCenterCount>
1

> <i_rge_R1_i_sd_ChiralCenterCountAllPossible>
1

> <i_rge_R1_i_sd_RingCount>
0

> <r_rge_R1_r_sd_AlogP>
1.0004

> <s_rge_R1_s_sd_subgroup_title>
eMol BB r-groups

> <s_rge_R1_s_sd_subgroupid>
eMol BB r-groups

> <i_rge_R1_i_sd_subgroup_collapsed>
0

> <s_rge_R1_s_sd_Unique_SMILES_Stereo>
NCC(C)CC

> <i_rge_R1_i_sd_canvasUID>
885

> <s_rge_R1_s_canvas_Unique_SMILES_Stereo>
NCC(C)CC

> <s_psp_Prime_MMGBSA_Input_Structure_Hash>
f67e2adbf37426f0a130796c13fac888a0cde51c0bcbf2a1f645a191

> <i_psp_number_heavy_atoms>
24

> <r_psp_MMGBSA_dG_Bind>
-41.8460505099065

> <r_psp_MMGBSA_dG_Bind_Coulomb>
-3.47936673591175

> <r_psp_MMGBSA_dG_Bind_Covalent>
4.59368915321738

> <r_psp_MMGBSA_dG_Bind_Hbond>
-0.0113538856383002

> <r_psp_MMGBSA_dG_Bind_Lipo>
-25.2514094166563

> <r_psp_MMGBSA_dG_Bind_Packing>
4.9737991503207e-014

> <r_psp_MMGBSA_dG_Bind_SelfCont>
7.105427357601e-015

> <r_psp_MMGBSA_dG_Bind_Solv_GB>
25.9138380786726

> <r_psp_MMGBSA_dG_Bind_vdW>
-43.6114477034962

> <r_psp_Lig_Strain_Energy>
7.94444214385395

> <r_psp_Lig_Strain_Coulomb>
0.221728269726093

> <r_psp_Lig_Strain_Covalent>
4.59389002132962

> <r_psp_Lig_Strain_Hbond>
0

> <r_psp_Lig_Strain_Lipo>
-0.117566146118666

> <r_psp_Lig_Strain_Packing>
0

> <r_psp_Lig_Strain_SelfCont>
0

> <r_psp_Lig_Strain_Solv_GB>
-0.100206521968843

> <r_psp_Lig_Strain_vdW>
3.34659652088574

> <r_psp_Ligand_Energy>
27.6406270090217

> <r_psp_Ligand_Coulomb>
0.343440875328454

> <r_psp_Ligand_Covalent>
23.3462117098579

> <r_psp_Ligand_Hbond>
0

> <r_psp_Ligand_Lipo>
-2.17234683867176

> <r_psp_Ligand_Packing>
0

> <r_psp_Ligand_SelfCont>
0

> <r_psp_Ligand_Solv_GB>
-7.3567203866254

> <r_psp_Ligand_vdW>
13.4800416491325

> <r_psp_Complex_Energy>
-34109.4564642347

> <r_psp_Complex_Coulomb>
-26462.0517398036

> <r_psp_Complex_Covalent>
4418.34642668448

> <r_psp_Complex_Hbond>
-550.108958968819

> <r_psp_Complex_Lipo>
-2177.94838859281

> <r_psp_Complex_Packing>
-55.8446424272089

> <r_psp_Complex_SelfCont>
-40.4078915603482

> <r_psp_Complex_Solv_GB>
-5187.99466267054

> <r_psp_Complex_vdW>
-4053.44660689585

> <r_psp_Receptor_Energy>
-34095.2510407338

> <r_psp_Receptor_Coulomb>
-26458.915813943

> <r_psp_Receptor_Covalent>
4390.40652582141

> <r_psp_Receptor_Hbond>
-550.097605083181

> <r_psp_Receptor_Lipo>
-2150.52463233748

> <r_psp_Receptor_Packing>
-55.8446424272089

> <r_psp_Receptor_SelfCont>
-40.4078915603482

> <r_psp_Receptor_Solv_GB>
-5206.55178036259

> <r_psp_Receptor_vdW>
-4023.31520084149

> <r_psp_MMGBSA_dG_Bind(NS)>
-49.7904926537085

> <r_psp_MMGBSA_dG_Bind(NS)_Coulomb>
-3.70109500567924

> <r_psp_MMGBSA_dG_Bind(NS)_Covalent>
-0.000200868111278396

> <r_psp_MMGBSA_dG_Bind(NS)_Hbond>
-0.0113538856380728

> <r_psp_MMGBSA_dG_Bind(NS)_Lipo>
-25.1338432705325

> <r_psp_MMGBSA_dG_Bind(NS)_Packing>
0

> <r_psp_MMGBSA_dG_Bind(NS)_SelfCont>
0

> <r_psp_MMGBSA_dG_Bind(NS)_Solv_GB>
26.0140446006435

> <r_psp_MMGBSA_dG_Bind(NS)_vdW>
-46.9580442243864

> <r_psp_Rec_Strain_Energy>
-5.0931703299284e-011

> <r_psp_Rec_Strain_Coulomb>
4.00177668780088e-011

> <r_psp_Rec_Strain_Covalent>
-9.09494701772928e-013

> <r_psp_Rec_Strain_Hbond>
-2.27373675443232e-013

> <r_psp_Rec_Strain_Lipo>
-5.00222085975111e-012

> <r_psp_Rec_Strain_Packing>
4.9737991503207e-014

> <r_psp_Rec_Strain_SelfCont>
7.105427357601e-015

> <r_psp_Rec_Strain_Solv_GB>
-1.81898940354586e-012

> <r_psp_Rec_Strain_vdW>
4.54747350886464e-012

> <r_psp_Prime_MMGBSA_ligand_efficiency>
-1.74358543791277

> <r_psp_Prime_MMGBSA_ligand_efficiency_sa>
-2.61537815686916

> <r_psp_Prime_MMGBSA_ligand_efficiency_ln>
-10.0156800771573

> <r_i_glide_lipo>
-4.45666364980272

> <r_i_glide_hbond>
0

> <r_i_glide_metal>
0

> <r_i_glide_rewards>
-1.95325951378261

> <r_i_glide_erotb>
1.05015834802646

> <r_i_glide_esite>
0

> <i_psp_ExecuteFunction_Internal_Entry_Index>
2273

> <i_qp_#stars>
1

> <i_qp_#amine>
1

> <i_qp_#amidine>
0

> <i_qp_#acid>
0

> <i_qp_#amide>
0

> <i_qp_#rotor>
6

> <i_qp_#rtvFG>
0

> <i_qp_CNS>
1

> <r_qp_mol_MW>
   327.469

> <r_qp_dipole>
     3.330

> <r_qp_SASA>
   686.457

> <r_qp_FOSA>
   456.036

> <r_qp_FISA>
    57.559

> <r_qp_PISA>
   172.861

> <r_qp_WPSA>
     0.000

> <r_qp_volume>
  1189.244

> <r_qp_donorHB>
     2.000

> <r_qp_accptHB>
     2.500

> <r_qp_dip^2/V>
   0.0093242

> <r_qp_ACxDN^.5/SA>
   0.0051504

> <r_qp_glob>
   0.7907989

> <r_qp_QPpolrz>
    39.238

> <r_qp_QPlogPC16>
    11.380

> <r_qp_QPlogPoct>
    16.634

> <r_qp_QPlogPw>
     7.007

> <r_qp_QPlogPo/w>
     4.742

> <r_qp_QPlogS>
    -5.432

> <r_qp_CIQPlogS>
    -4.183

> <r_qp_QPlogHERG>
    -6.468

> <r_qp_QPPCaco>
   703.023

> <r_qp_QPlogBB>
    -0.013

> <r_qp_QPPMDCK>
   373.957

> <r_qp_QPlogKp>
    -3.458

> <r_qp_IP(eV)>
     7.318

> <r_qp_EA(eV)>
     0.162

> <i_qp_#metab>
2

> <r_qp_QPlogKhsa>
     1.001

> <i_qp_HumanOralAbsorption>
3

> <r_qp_PercentHumanOralAbsorption>
   100.000

> <r_qp_SAfluorine>
     0.000

> <r_qp_SAamideO>
     0.000

> <r_qp_PSA>
    59.465

> <i_qp_#NandO>
4

> <i_qp_RuleOfFive>
0

> <i_qp_RuleOfThree>
0

> <i_qp_#ringatoms>
15

> <i_qp_#in34>
0

> <i_qp_#in56>
15

> <i_qp_#noncon>
6

> <i_qp_#nonHatm>
24

> <r_qp_Jm>
0.000422058664469406

> <s_m_subgroupid>
100str_copy1

> <s_m_subgroup_title>
100str

> <b_m_subgroup_collapsed>
0

$$$$
ind_1,500549
                    3D
 Structure written by MMmdl.
 50 53  0  0  1  0            999 V2000
   -3.2877    1.6819    0.0763 C   0  0  0  0  0  0
   -2.2415    0.7536    0.0311 C   0  0  0  0  0  0
   -0.8728    1.1413   -0.0073 C   0  0  0  0  0  0
   -0.5675    2.5138   -0.0008 C   0  0  0  0  0  0
   -1.6061    3.4423    0.0453 C   0  0  0  0  0  0
   -2.9357    3.0316    0.0834 C   0  0  0  0  0  0
   -0.0755   -0.0585   -0.0487 C   0  0  0  0  0  0
   -0.9728   -1.1338   -0.0235 C   0  0  0  0  0  0
   -2.2532   -0.6199    0.0069 N   0  0  0  0  0  0
   -0.6922   -2.5525   -0.1148 C   0  0  0  0  0  0
   -1.6878   -3.3572    0.3102 N   0  0  0  0  0  0
    0.3873   -2.9703   -0.5360 O   0  0  0  0  0  0
   -1.6636   -4.8214    0.3154 C   0  0  0  0  0  0
   -2.6951   -5.4384    1.2908 C   0  0  0  0  0  0
   -2.7027   -6.9800    1.2925 C   0  0  0  0  0  0
   -2.8272   -7.5632   -0.1241 C   0  0  0  0  0  0
   -1.7234   -7.0226   -1.0472 C   0  0  0  0  0  0
   -1.6964   -5.4820   -1.0889 C   0  0  0  0  0  0
   -4.3236    1.3773    0.1042 H   0  0  0  0  0  0
    0.4583    2.8505   -0.0306 H   0  0  0  0  0  0
   -1.3760    4.4978    0.0513 H   0  0  0  0  0  0
   -3.7150    3.7788    0.1183 H   0  0  0  0  0  0
   -3.0673   -1.2168    0.0045 H   0  0  0  0  0  0
   -2.5637   -2.9324    0.5756 H   0  0  0  0  0  0
   -0.6965   -5.1060    0.7386 H   0  0  0  0  0  0
   -2.5168   -5.0791    2.3054 H   0  0  0  0  0  0
   -3.6934   -5.1015    1.0071 H   0  0  0  0  0  0
   -1.7837   -7.3451    1.7538 H   0  0  0  0  0  0
   -3.5194   -7.3455    1.9164 H   0  0  0  0  0  0
   -2.7772   -8.6520   -0.0832 H   0  0  0  0  0  0
   -3.8061   -7.3173   -0.5385 H   0  0  0  0  0  0
   -0.7550   -7.3899   -0.7040 H   0  0  0  0  0  0
   -1.8562   -7.4176   -2.0550 H   0  0  0  0  0  0
   -2.5905   -5.1446   -1.6153 H   0  0  0  0  0  0
   -0.8406   -5.1590   -1.6832 H   0  0  0  0  0  0
    1.4436   -0.0790   -0.1042 C   0  0  0  0  0  0
    1.9665    0.0894   -1.5428 C   0  0  0  0  0  0
    3.4794    0.0795   -1.6072 C   0  0  0  0  0  0
    4.3815   -0.8356   -2.1405 C   0  0  0  0  0  0
    5.6802   -0.3614   -1.9246 C   0  0  0  0  0  0
    5.5698    0.8443   -1.2546 C   0  0  0  0  0  0
    4.2348    1.0958   -1.0715 N   0  0  0  0  0  0
    3.8584    1.9105   -0.6081 H   0  0  0  0  0  0
    1.8386    0.7170    0.5285 H   0  0  0  0  0  0
    1.8310   -1.0080    0.3150 H   0  0  0  0  0  0
    1.5712   -0.7141   -2.1664 H   0  0  0  0  0  0
    1.5903    1.0224   -1.9651 H   0  0  0  0  0  0
    4.1217   -1.7586   -2.6374 H   0  0  0  0  0  0
    6.5975   -0.8470   -2.2234 H   0  0  0  0  0  0
    6.3137    1.5396   -0.8944 H   0  0  0  0  0  0
  1  2  2  0  0  0
  1  6  1  0  0  0
  1 19  1  0  0  0
  2  3  1  0  0  0
  2  9  1  0  0  0
  3  4  2  0  0  0
  3  7  1  0  0  0
  4  5  1  0  0  0
  4 20  1  0  0  0
  5  6  2  0  0  0
  5 21  1  0  0  0
  6 22  1  0  0  0
  7  8  2  0  0  0
  7 36  1  0  0  0
  8  9  1  0  0  0
  8 10  1  0  0  0
  9 23  1  0  0  0
 10 11  1  0  0  0
 10 12  2  0  0  0
 11 13  1  0  0  0
 11 24  1  0  0  0
 13 18  1  0  0  0
 13 14  1  0  0  0
 13 25  1  0  0  0
 14 15  1  0  0  0
 14 26  1  0  0  0
 14 27  1  0  0  0
 15 16  1  0  0  0
 15 28  1  0  0  0
 15 29  1  0  0  0
 16 17  1  0  0  0
 16 30  1  0  0  0
 16 31  1  0  0  0
 17 18  1  0  0  0
 17 32  1  0  0  0
 17 33  1  0  0  0
 18 34  1  0  0  0
 18 35  1  0  0  0
 36 37  1  0  0  0
 36 44  1  0  0  0
 36 45  1  0  0  0
 37 38  1  0  0  0
 37 46  1  0  0  0
 37 47  1  0  0  0
 38 42  1  0  0  0
 38 39  2  0  0  0
 39 40  1  0  0  0
 39 48  1  0  0  0
 40 41  2  0  0  0
 40 49  1  0  0  0
 41 42  1  0  0  0
 41 50  1  0  0  0
 42 43  1  0  0  0
M  END
> <s_m_entry_id>
8133

> <s_m_entry_name>
entry

> <i_f3d_flags>
0

> <s_m_job_name>
adme_1000

> <r_psp_Prime_Energy>
-34119.4008372216

> <r_psp_Prime_Solv_GB>
-5185.84838308794

> <r_psp_Prime_Coulomb>
-26470.1677972702

> <r_psp_Prime_vdW>
-4058.36930443602

> <r_psp_Prime_Covalent>
4418.87744716381

> <i_psp_model_num>
0

> <r_psp_Prime_Lipo>
-2177.02058442488

> <s_psp_Prime_Energy_Force_Field>
S-OPLS

> <s_psp_Prime_Energy_Solvent_Model>
VSGB2.1

> <r_psp_Prime_Hbond>
-550.619630344085

> <r_psp_Prime_Packing>
-55.844693261951

> <r_psp_Prime_SelfCont>
-40.4078915603482

> <r_psp_Memb1_x>
103.457542316003

> <r_psp_Memb1_y>
39.4731108300965

> <r_psp_Memb1_z>
48.7987221124676

> <r_psp_Memb2_x>
99.8134167309003

> <r_psp_Memb2_y>
2.81176945184187

> <r_psp_Memb2_z>
23.8404289603493

> <r_psp_MembDummyRadius>
4.45

> <r_psp_Prime_Bond_Covalent>
467.082903165332

> <r_psp_Prime_Bond_SGB>
49963.831997273

> <r_psp_Prime_Angle_Covalent>
2224.69040626353

> <r_psp_Prime_Angle_SGB>
-21645.1319964187

> <r_psp_Prime_Torsion_Covalent>
1727.10413773494

> <r_psp_Prime_NB14_LJ>
4239.26805428164

> <r_psp_Prime_NB14_Lipo>
0

> <r_psp_Prime_NB14_Elec>
25568.9769861238

> <r_psp_Prime_NB14_SGB>
-15621.8905828921

> <r_psp_Prime_NBShort_LJ>
-7882.73739750542

> <r_psp_Prime_NBShort_Lipo>
-2177.02058442488

> <r_psp_Prime_NBShort_Elec>
-53058.0688520875

> <r_psp_Prime_NBShort_SGB>
18018.4610516826

> <r_psp_Prime_NBLong_LJ>
-414.89996121224

> <r_psp_Prime_NBLong_Lipo>
0

> <r_psp_Prime_NBLong_Elec>
1018.92406869352

> <r_psp_Prime_NBLong_SGB>
-1161.02100060296

> <r_psp_Prime_Self_SGB>
-34740.0978521298

> <s_m_Source_Path>
F:\Dekstop_files\DAC4,5\Molecular Systems Desgn and Engineering\supplementary_str

> <s_m_Source_File>
1000_str.mae

> <i_m_Source_File_Index>
944

> <i_lp_mmshare_version>
53156

> <s_epik_input>
W25IXTFbY0hdW2NIXVtjSF1jMVtDSDJdW0NIMl1jKGMoYzIzKVtjSF1bY0hdW2NIXVtjSF0yKWMoW25IXTMpQyg9TylbTkhdW0NIXTRbQ0gyXVtDSDJdW0NIMl1bQ0gyXVtDSDJdNA==

> <s_epik_cmdline>
J2VwaWtfcHl0aG9uJywgJy1waHQnLCAnMC4wJywgJy1waCcsICc3LjAnLCAnLXRuJywgJzgnLCAnLW1hJywgJzUwMCcsICctaW1hZScsICc8aW5maWxlLm1hZT4nLCAnLW9tYWUnLCAnPG91dGZpbGUubWFlPic=

> <r_lp_tautomer_probability>
1

> <r_epik_Ionization_Penalty>
  0.0000

> <r_epik_Ionization_Penalty_Charging>
  0.0000

> <r_epik_Ionization_Penalty_Neutral>
  0.0000

> <r_epik_State_Penalty>
  0.0000

> <r_epik_Charging_Adjusted_Penalty>
0

> <i_epik_Tot_Q>
0

> <i_epik_Tot_abs_Q>
0

> <s_lp_Force_Field>
S-OPLS

> <r_lp_Energy>
36.228636

> <b_lp_Chiralities_Consistent>
1

> <s_lp_Variant>
ind_1,500549-1

> <s_i_glide_gridfile>
glide-grid_mmpl3

> <i_i_glide_lignum>
894

> <i_i_glide_rotatable_bonds>
6

> <r_i_docking_score>
-9.41535999154335

> <r_i_glide_ligand_efficiency>
-0.376614399661734

> <r_i_glide_ligand_efficiency_sa>
-1.10122718389573

> <r_i_glide_ligand_efficiency_ln>
-2.23172247356616

> <r_i_glide_gscore>
-9.41535999154335

> <r_i_glide_evdw>
-40.0493392944336

> <r_i_glide_ecoul>
-2.77266764640808

> <r_i_glide_energy>
-42.8220069408417

> <r_i_glide_einternal>
1.50594401359558

> <r_i_glide_emodel>
-63.0601021836429

> <i_i_glide_confnum>
52

> <i_i_glide_posenum>
283

> <r_i_glide_eff_state_penalty>
0

> <i_rge_num_r_groups>
1

> <r_rge_occupation_R1>
1

> <s_rge_R1>
500549

> <s_rge_R1_s_m_title>
500549

> <s_rge_R1_s_m_entry_id>
16649

> <s_rge_R1_s_m_entry_name>
eMol_BB_r-groups.367

> <s_rge_R1_s_m_smiles>
[*]CCc1ccc[nH]1

> <b_rge_R1_b_sd_chiral_flag>
0

> <i_rge_R1_i_sd_version>
0

> <s_rge_R1_s_m_Source_File>
eMol_BB_r-groups-dedup.mae

> <i_rge_R1_i_m_Source_File_Index>
274

> <s_rge_R1_s_m_Source_Path>
/Users/konze/projects/pathfinder/r-groups

> <s_rge_R1_s_sd_Source_Path>
/Users/konze/projects/pathfinder/reactant sets/eMolecules

> <s_rge_R1_s_sd_Source_File>
eMol BB r-groups.mae

> <i_rge_R1_i_sd_Source_File_Index>
367

> <r_rge_R1_r_sd_MW>
95.1424

> <i_rge_R1_i_sd_RB>
1

> <i_rge_R1_i_sd_HeavyAtomCount>
7

> <i_rge_R1_i_sd_HBA>
0

> <i_rge_R1_i_sd_HBD>
1

> <r_rge_R1_r_sd_PSA>
15.79

> <i_rge_R1_i_sd_ChiralCenterCount>
0

> <i_rge_R1_i_sd_ChiralCenterCountAllPossible>
0

> <i_rge_R1_i_sd_RingCount>
1

> <r_rge_R1_r_sd_AlogP>
1.2203

> <s_rge_R1_s_sd_subgroup_title>
eMol BB r-groups

> <s_rge_R1_s_sd_subgroupid>
eMol BB r-groups

> <i_rge_R1_i_sd_subgroup_collapsed>
0

> <s_rge_R1_s_sd_Unique_SMILES_Stereo>
CCc1ccc[nH]1

> <i_rge_R1_i_sd_canvasUID>
312

> <s_rge_R1_s_canvas_Unique_SMILES_Stereo>
CCc1ccc[nH]1

> <s_psp_Prime_MMGBSA_Input_Structure_Hash>
77a030b6653dcca94f661d1cb9092de642944444be9a4fc70fda9c83

> <i_psp_number_heavy_atoms>
25

> <r_psp_MMGBSA_dG_Bind>
-44.0482889385385

> <r_psp_MMGBSA_dG_Bind_Coulomb>
-6.57137681912354

> <r_psp_MMGBSA_dG_Bind_Covalent>
2.82010717668072

> <r_psp_MMGBSA_dG_Bind_Hbond>
-0.522025260904456

> <r_psp_MMGBSA_dG_Bind_Lipo>
-24.5153386409706

> <r_psp_MMGBSA_dG_Bind_Packing>
-5.0834742118866e-005

> <r_psp_MMGBSA_dG_Bind_SelfCont>
7.105427357601e-015

> <r_psp_MMGBSA_dG_Bind_Solv_GB>
31.1686266982251

> <r_psp_MMGBSA_dG_Bind_vdW>
-46.428231257622

> <r_psp_Lig_Strain_Energy>
6.418214292548

> <r_psp_Lig_Strain_Coulomb>
1.07904359744304

> <r_psp_Lig_Strain_Covalent>
2.8203080447931

> <r_psp_Lig_Strain_Hbond>
0

> <r_psp_Lig_Strain_Lipo>
0.00256138480901735

> <r_psp_Lig_Strain_Packing>
0

> <r_psp_Lig_Strain_SelfCont>
0

> <r_psp_Lig_Strain_Solv_GB>
-0.0299584507089321

> <r_psp_Lig_Strain_vdW>
2.54625971621178

> <r_psp_Ligand_Energy>
19.8984924507386

> <r_psp_Ligand_Coulomb>
-4.68060650806171

> <r_psp_Ligand_Covalent>
25.6508141657159

> <r_psp_Ligand_Hbond>
0

> <r_psp_Ligand_Lipo>
-1.98061344642998

> <r_psp_Ligand_Packing>
0

> <r_psp_Ligand_SelfCont>
0

> <r_psp_Ligand_Solv_GB>
-10.465229423577

> <r_psp_Ligand_vdW>
11.3741276630914

> <r_psp_Complex_Energy>
-34119.4008372216

> <r_psp_Complex_Coulomb>
-26470.1677972702

> <r_psp_Complex_Covalent>
4418.87744716381

> <r_psp_Complex_Hbond>
-550.619630344085

> <r_psp_Complex_Lipo>
-2177.02058442488

> <r_psp_Complex_Packing>
-55.844693261951

> <r_psp_Complex_SelfCont>
-40.4078915603482

> <r_psp_Complex_Solv_GB>
-5185.84838308794

> <r_psp_Complex_vdW>
-4058.36930443602

> <r_psp_Receptor_Energy>
-34095.2510407338

> <r_psp_Receptor_Coulomb>
-26458.915813943

> <r_psp_Receptor_Covalent>
4390.40652582141

> <r_psp_Receptor_Hbond>
-550.097605083181

> <r_psp_Receptor_Lipo>
-2150.52463233748

> <r_psp_Receptor_Packing>
-55.8446424272089

> <r_psp_Receptor_SelfCont>
-40.4078915603482

> <r_psp_Receptor_Solv_GB>
-5206.55178036259

> <r_psp_Receptor_vdW>
-4023.31520084149

> <r_psp_MMGBSA_dG_Bind(NS)>
-50.4665032310368

> <r_psp_MMGBSA_dG_Bind(NS)_Coulomb>
-7.6504204166049

> <r_psp_MMGBSA_dG_Bind(NS)_Covalent>
-0.000200868111278396

> <r_psp_MMGBSA_dG_Bind(NS)_Hbond>
-0.522025260904229

> <r_psp_MMGBSA_dG_Bind(NS)_Lipo>
-24.5179000257749

> <r_psp_MMGBSA_dG_Bind(NS)_Packing>
-5.0834742168604e-005

> <r_psp_MMGBSA_dG_Bind(NS)_SelfCont>
0

> <r_psp_MMGBSA_dG_Bind(NS)_Solv_GB>
31.1985851489362

> <r_psp_MMGBSA_dG_Bind(NS)_vdW>
-48.9744909738383

> <r_psp_Rec_Strain_Energy>
-5.0931703299284e-011

> <r_psp_Rec_Strain_Coulomb>
4.00177668780088e-011

> <r_psp_Rec_Strain_Covalent>
-9.09494701772928e-013

> <r_psp_Rec_Strain_Hbond>
-2.27373675443232e-013

> <r_psp_Rec_Strain_Lipo>
-5.00222085975111e-012

> <r_psp_Rec_Strain_Packing>
4.9737991503207e-014

> <r_psp_Rec_Strain_SelfCont>
7.105427357601e-015

> <r_psp_Rec_Strain_Solv_GB>
-1.81898940354586e-012

> <r_psp_Rec_Strain_vdW>
4.54747350886464e-012

> <r_psp_Prime_MMGBSA_ligand_efficiency>
-1.76193155754154

> <r_psp_Prime_MMGBSA_ligand_efficiency_sa>
-2.64289733631231

> <r_psp_Prime_MMGBSA_ligand_efficiency_ln>
-10.440764499134

> <r_i_glide_lipo>
-4.98834892602663

> <r_i_glide_hbond>
-0.32

> <r_i_glide_metal>
0

> <r_i_glide_rewards>
-2.69503780686792

> <r_i_glide_erotb>
1.00639385303409

> <r_i_glide_esite>
0

> <i_psp_ExecuteFunction_Internal_Entry_Index>
79

> <i_qp_#stars>
0

> <i_qp_#amine>
0

> <i_qp_#amidine>
0

> <i_qp_#acid>
0

> <i_qp_#amide>
0

> <i_qp_#rotor>
5

> <i_qp_#rtvFG>
0

> <i_qp_CNS>
-1

> <r_qp_mol_MW>
   335.448

> <r_qp_dipole>
     8.002

> <r_qp_SASA>
   669.823

> <r_qp_FOSA>
   290.096

> <r_qp_FISA>
    62.906

> <r_qp_PISA>
   316.821

> <r_qp_WPSA>
     0.000

> <r_qp_volume>
  1162.630

> <r_qp_donorHB>
     3.000

> <r_qp_accptHB>
     2.500

> <r_qp_dip^2/V>
   0.0550698

> <r_qp_ACxDN^.5/SA>
   0.0064646

> <r_qp_glob>
   0.7983001

> <r_qp_QPpolrz>
    40.190

> <r_qp_QPlogPC16>
    12.388

> <r_qp_QPlogPoct>
    19.367

> <r_qp_QPlogPw>
     9.668

> <r_qp_QPlogPo/w>
     4.985

> <r_qp_QPlogS>
    -6.229

> <r_qp_CIQPlogS>
    -5.546

> <r_qp_QPlogHERG>
    -6.307

> <r_qp_QPPCaco>
  2508.183

> <r_qp_QPlogBB>
    -0.396

> <r_qp_QPPMDCK>
  1336.627

> <r_qp_QPlogKp>
    -1.083

> <r_qp_IP(eV)>
     8.415

> <r_qp_EA(eV)>
     0.488

> <i_qp_#metab>
2

> <r_qp_QPlogKhsa>
     0.838

> <i_qp_HumanOralAbsorption>
1

> <r_qp_PercentHumanOralAbsorption>
   100.000

> <r_qp_SAfluorine>
     0.000

> <r_qp_SAamideO>
     0.000

> <r_qp_PSA>
    61.812

> <i_qp_#NandO>
4

> <i_qp_RuleOfFive>
0

> <i_qp_RuleOfThree>
1

> <i_qp_#ringatoms>
20

> <i_qp_#in34>
0

> <i_qp_#in56>
20

> <i_qp_#noncon>
6

> <i_qp_#nonHatm>
25

> <r_qp_Jm>
0.0163732626070588

> <s_m_subgroupid>
100str_copy1

> <s_m_subgroup_title>
100str

> <b_m_subgroup_collapsed>
0

$$$$
ind_1,503848
                    3D
 Structure written by MMmdl.
 50 53  0  0  1  0            999 V2000
   -3.2787    1.7157    0.2751 C   0  0  0  0  0  0
   -2.2254    0.7994    0.1792 C   0  0  0  0  0  0
   -0.8596    1.2002    0.1508 C   0  0  0  0  0  0
   -0.5663    2.5731    0.2340 C   0  0  0  0  0  0
   -1.6121    3.4891    0.3326 C   0  0  0  0  0  0
   -2.9379    3.0660    0.3510 C   0  0  0  0  0  0
   -0.0613    0.0052    0.0390 C   0  0  0  0  0  0
   -0.9481   -1.0812    0.0289 C   0  0  0  0  0  0
   -2.2295   -0.5725    0.0922 N   0  0  0  0  0  0
   -0.6685   -2.4950   -0.1327 C   0  0  0  0  0  0
   -1.6503   -3.3198    0.2854 N   0  0  0  0  0  0
    0.3999   -2.8920   -0.5999 O   0  0  0  0  0  0
   -1.6215   -4.7828    0.2296 C   0  0  0  0  0  0
   -2.6337   -5.4443    1.1962 C   0  0  0  0  0  0
   -2.6310   -6.9846    1.1381 C   0  0  0  0  0  0
   -2.7735   -7.5131   -0.2983 C   0  0  0  0  0  0
   -1.6880   -6.9291   -1.2168 C   0  0  0  0  0  0
   -1.6723   -5.3877   -1.1992 C   0  0  0  0  0  0
   -4.3118    1.4009    0.2916 H   0  0  0  0  0  0
    0.4561    2.9205    0.2250 H   0  0  0  0  0  0
   -1.3905    4.5445    0.3963 H   0  0  0  0  0  0
   -3.7235    3.8035    0.4275 H   0  0  0  0  0  0
   -3.0416   -1.1717    0.0683 H   0  0  0  0  0  0
   -2.5185   -2.9094    0.5955 H   0  0  0  0  0  0
   -0.6462   -5.0786    0.6252 H   0  0  0  0  0  0
   -2.4413   -5.1232    2.2212 H   0  0  0  0  0  0
   -3.6387   -5.1036    0.9413 H   0  0  0  0  0  0
   -1.7023   -7.3603    1.5710 H   0  0  0  0  0  0
   -3.4354   -7.3795    1.7602 H   0  0  0  0  0  0
   -2.7162   -8.6023   -0.3010 H   0  0  0  0  0  0
   -3.7604   -7.2580   -0.6875 H   0  0  0  0  0  0
   -0.7116   -7.3021   -0.9033 H   0  0  0  0  0  0
   -1.8333   -7.2862   -2.2371 H   0  0  0  0  0  0
   -2.5773   -5.0362   -1.6976 H   0  0  0  0  0  0
   -0.8284   -5.0361   -1.7943 H   0  0  0  0  0  0
    1.9427    1.6190   -2.0048 C   0  0  0  0  0  0
    2.2830    0.6774   -0.8718 C   0  0  0  0  0  0
    3.5635    0.2154   -0.5275 C   0  0  0  0  0  0
    3.4801   -0.6897    0.5178 C   0  0  0  0  0  0
    4.5252   -1.4711    1.2766 C   0  0  0  0  0  0
    2.1457   -0.8092    0.7941 N   0  0  0  0  0  0
    1.3986   -0.0188   -0.0438 C   0  0  0  0  0  0
    1.7596   -1.4166    1.5023 H   0  0  0  0  0  0
    2.6473    1.5195   -2.8308 H   0  0  0  0  0  0
    1.9627    2.6619   -1.6886 H   0  0  0  0  0  0
    0.9577    1.4137   -2.4248 H   0  0  0  0  0  0
    4.4815    0.5242   -1.0052 H   0  0  0  0  0  0
    5.5267   -1.2938    0.8841 H   0  0  0  0  0  0
    4.3446   -2.5450    1.2208 H   0  0  0  0  0  0
    4.5411   -1.2019    2.3329 H   0  0  0  0  0  0
  1  2  2  0  0  0
  1  6  1  0  0  0
  1 19  1  0  0  0
  2  3  1  0  0  0
  2  9  1  0  0  0
  3  4  2  0  0  0
  3  7  1  0  0  0
  4  5  1  0  0  0
  4 20  1  0  0  0
  5  6  2  0  0  0
  5 21  1  0  0  0
  6 22  1  0  0  0
  7  8  2  0  0  0
  7 42  1  0  0  0
  8  9  1  0  0  0
  8 10  1  0  0  0
  9 23  1  0  0  0
 10 11  1  0  0  0
 10 12  2  0  0  0
 11 13  1  0  0  0
 11 24  1  0  0  0
 13 18  1  0  0  0
 13 14  1  0  0  0
 13 25  1  0  0  0
 14 15  1  0  0  0
 14 26  1  0  0  0
 14 27  1  0  0  0
 15 16  1  0  0  0
 15 28  1  0  0  0
 15 29  1  0  0  0
 16 17  1  0  0  0
 16 30  1  0  0  0
 16 31  1  0  0  0
 17 18  1  0  0  0
 17 32  1  0  0  0
 17 33  1  0  0  0
 18 34  1  0  0  0
 18 35  1  0  0  0
 36 37  1  0  0  0
 36 44  1  0  0  0
 36 45  1  0  0  0
 36 46  1  0  0  0
 37 42  2  0  0  0
 37 38  1  0  0  0
 38 39  2  0  0  0
 38 47  1  0  0  0
 39 40  1  0  0  0
 39 41  1  0  0  0
 40 48  1  0  0  0
 40 49  1  0  0  0
 40 50  1  0  0  0
 41 42  1  0  0  0
 41 43  1  0  0  0
M  END
> <s_m_entry_id>
8102

> <s_m_entry_name>
entry

> <i_f3d_flags>
0

> <s_m_job_name>
adme_1000

> <r_psp_Prime_Energy>
-34130.8107947186

> <r_psp_Prime_Solv_GB>
-5192.706338448

> <r_psp_Prime_Coulomb>
-26473.8290173537

> <r_psp_Prime_vdW>
-4056.14069209458

> <r_psp_Prime_Covalent>
4415.87646754135

> <i_psp_model_num>
0

> <r_psp_Prime_Lipo>
-2177.57874584292

> <s_psp_Prime_Energy_Force_Field>
S-OPLS

> <s_psp_Prime_Energy_Solvent_Model>
VSGB2.1

> <r_psp_Prime_Hbond>
-550.179934533259

> <r_psp_Prime_Packing>
-55.8446424272089

> <r_psp_Prime_SelfCont>
-40.4078915603482

> <r_psp_Memb1_x>
103.457542316003

> <r_psp_Memb1_y>
39.4731108300965

> <r_psp_Memb1_z>
48.7987221124676

> <r_psp_Memb2_x>
99.8134167309003

> <r_psp_Memb2_y>
2.81176945184187

> <r_psp_Memb2_z>
23.8404289603493

> <r_psp_MembDummyRadius>
4.45

> <r_psp_Prime_Bond_Covalent>
468.138999727662

> <r_psp_Prime_Bond_SGB>
49969.2694581007

> <r_psp_Prime_Angle_Covalent>
2226.6873195907

> <r_psp_Prime_Angle_SGB>
-21652.0560344835

> <r_psp_Prime_Torsion_Covalent>
1721.050148223

> <r_psp_Prime_NB14_LJ>
4236.033089107

> <r_psp_Prime_NB14_Lipo>
0

> <r_psp_Prime_NB14_Elec>
25559.3240131159

> <r_psp_Prime_NB14_SGB>
-15623.566528417

> <r_psp_Prime_NBShort_LJ>
-7877.02098892251

> <r_psp_Prime_NBShort_Lipo>
-2177.57874584292

> <r_psp_Prime_NBShort_Elec>
-53053.172656847

> <r_psp_Prime_NBShort_SGB>
18020.8530882871

> <r_psp_Prime_NBLong_LJ>
-415.152792279069

> <r_psp_Prime_NBLong_Lipo>
0

> <r_psp_Prime_NBLong_Elec>
1020.01962637741

> <r_psp_Prime_NBLong_SGB>
-1166.12697565878

> <r_psp_Prime_Self_SGB>
-34741.0793462766

> <s_m_Source_Path>
F:\Dekstop_files\DAC4,5\Molecular Systems Desgn and Engineering\supplementary_str

> <s_m_Source_File>
1000_str.mae

> <i_m_Source_File_Index>
914

> <i_lp_mmshare_version>
53156

> <s_epik_input>
W0NIM11jMVtjSF1jKFtDSDNdKVtuSF1jMS1jKGMoYzIzKVtjSF1bY0hdW2NIXVtjSF0yKWMoW25IXTMpQyg9TylbTkhdW0NIXTRbQ0gyXVtDSDJdW0NIMl1bQ0gyXVtDSDJdNA==

> <s_epik_cmdline>
J2VwaWtfcHl0aG9uJywgJy1waHQnLCAnMC4wJywgJy1waCcsICc3LjAnLCAnLXRuJywgJzgnLCAnLW1hJywgJzUwMCcsICctaW1hZScsICc8aW5maWxlLm1hZT4nLCAnLW9tYWUnLCAnPG91dGZpbGUubWFlPic=

> <r_lp_tautomer_probability>
1

> <r_epik_Ionization_Penalty>
  0.0000

> <r_epik_Ionization_Penalty_Charging>
  0.0000

> <r_epik_Ionization_Penalty_Neutral>
  0.0000

> <r_epik_State_Penalty>
  0.0000

> <r_epik_Charging_Adjusted_Penalty>
0

> <i_epik_Tot_Q>
0

> <i_epik_Tot_abs_Q>
0

> <s_lp_Force_Field>
S-OPLS

> <r_lp_Energy>
30.074189

> <b_lp_Chiralities_Consistent>
1

> <s_lp_Variant>
ind_1,503848-1

> <s_i_glide_gridfile>
glide-grid_mmpl3

> <i_i_glide_lignum>
903

> <i_i_glide_rotatable_bonds>
4

> <r_i_docking_score>
-8.10868965692089

> <r_i_glide_ligand_efficiency>
-0.324347586276835

> <r_i_glide_ligand_efficiency_sa>
-0.948398094602403

> <r_i_glide_ligand_efficiency_ln>
-1.92200244651055

> <r_i_glide_gscore>
-8.10868965692089

> <r_i_glide_evdw>
-41.9200820922852

> <r_i_glide_ecoul>
-1.02116715908051

> <r_i_glide_energy>
-42.9412492513657

> <r_i_glide_einternal>
1.59953451156616

> <r_i_glide_emodel>
-61.8200614394379

> <i_i_glide_confnum>
23

> <i_i_glide_posenum>
285

> <r_i_glide_eff_state_penalty>
0

> <i_rge_num_r_groups>
1

> <r_rge_occupation_R1>
1

> <s_rge_R1>
503848

> <s_rge_R1_s_m_title>
503848

> <s_rge_R1_s_m_entry_id>
16658

> <s_rge_R1_s_m_entry_name>
eMol_BB_r-groups.368

> <s_rge_R1_s_m_smiles>
[*]c1c(C)cc(C)[nH]1

> <b_rge_R1_b_sd_chiral_flag>
0

> <i_rge_R1_i_sd_version>
0

> <s_rge_R1_s_m_Source_File>
eMol_BB_r-groups-dedup.mae

> <i_rge_R1_i_m_Source_File_Index>
275

> <s_rge_R1_s_m_Source_Path>
/Users/konze/projects/pathfinder/r-groups

> <s_rge_R1_s_sd_Source_Path>
/Users/konze/projects/pathfinder/reactant sets/eMolecules

> <s_rge_R1_s_sd_Source_File>
eMol BB r-groups.mae

> <i_rge_R1_i_sd_Source_File_Index>
368

> <r_rge_R1_r_sd_MW>
95.1424

> <i_rge_R1_i_sd_RB>
0

> <i_rge_R1_i_sd_HeavyAtomCount>
7

> <i_rge_R1_i_sd_HBA>
0

> <i_rge_R1_i_sd_HBD>
1

> <r_rge_R1_r_sd_PSA>
15.79

> <i_rge_R1_i_sd_ChiralCenterCount>
0

> <i_rge_R1_i_sd_ChiralCenterCountAllPossible>
0

> <i_rge_R1_i_sd_RingCount>
1

> <r_rge_R1_r_sd_AlogP>
1.0396

> <s_rge_R1_s_sd_subgroup_title>
eMol BB r-groups

> <s_rge_R1_s_sd_subgroupid>
eMol BB r-groups

> <i_rge_R1_i_sd_subgroup_collapsed>
0

> <s_rge_R1_s_sd_Unique_SMILES_Stereo>
Cc1cc(C)[nH]c1

> <i_rge_R1_i_sd_canvasUID>
313

> <s_rge_R1_s_canvas_Unique_SMILES_Stereo>
Cc1cc(C)[nH]c1

> <s_psp_Prime_MMGBSA_Input_Structure_Hash>
9502d1b1d1e1b78904b5864df0c08cb48f7bcd18bd65295122986f9d

> <i_psp_number_heavy_atoms>
25

> <r_psp_MMGBSA_dG_Bind>
-41.9725680592455

> <r_psp_MMGBSA_dG_Bind_Coulomb>
3.97664889074804

> <r_psp_MMGBSA_dG_Bind_Covalent>
1.62726071808538

> <r_psp_MMGBSA_dG_Bind_Hbond>
-0.0823294500784186

> <r_psp_MMGBSA_dG_Bind_Lipo>
-25.2932702150629

> <r_psp_MMGBSA_dG_Bind_Packing>
4.9737991503207e-014

> <r_psp_MMGBSA_dG_Bind_SelfCont>
7.105427357601e-015

> <r_psp_MMGBSA_dG_Bind_Solv_GB>
21.0031044440511

> <r_psp_MMGBSA_dG_Bind_vdW>
-43.2039824468943

> <r_psp_Lig_Strain_Energy>
4.065321873315

> <r_psp_Lig_Strain_Coulomb>
1.52907698561761

> <r_psp_Lig_Strain_Covalent>
1.62746158619783

> <r_psp_Lig_Strain_Hbond>
0

> <r_psp_Lig_Strain_Lipo>
0.0736015452095327

> <r_psp_Lig_Strain_Packing>
0

> <r_psp_Lig_Strain_SelfCont>
0

> <r_psp_Lig_Strain_Solv_GB>
-0.847205464866761

> <r_psp_Lig_Strain_vdW>
1.68238722115677

> <r_psp_Ligand_Energy>
6.41281407442155

> <r_psp_Ligand_Coulomb>
-18.8898523014103

> <r_psp_Ligand_Covalent>
23.8426810018584

> <r_psp_Ligand_Hbond>
0

> <r_psp_Ligand_Lipo>
-1.7608432903741

> <r_psp_Ligand_Packing>
0

> <r_psp_Ligand_SelfCont>
0

> <r_psp_Ligand_Solv_GB>
-7.15766252946034

> <r_psp_Ligand_vdW>
10.3784911938079

> <r_psp_Complex_Energy>
-34130.8107947186

> <r_psp_Complex_Coulomb>
-26473.8290173537

> <r_psp_Complex_Covalent>
4415.87646754135

> <r_psp_Complex_Hbond>
-550.179934533259

> <r_psp_Complex_Lipo>
-2177.57874584292

> <r_psp_Complex_Packing>
-55.8446424272089

> <r_psp_Complex_SelfCont>
-40.4078915603482

> <r_psp_Complex_Solv_GB>
-5192.706338448

> <r_psp_Complex_vdW>
-4056.14069209458

> <r_psp_Receptor_Energy>
-34095.2510407338

> <r_psp_Receptor_Coulomb>
-26458.915813943

> <r_psp_Receptor_Covalent>
4390.40652582141

> <r_psp_Receptor_Hbond>
-550.097605083181

> <r_psp_Receptor_Lipo>
-2150.52463233748

> <r_psp_Receptor_Packing>
-55.8446424272089

> <r_psp_Receptor_SelfCont>
-40.4078915603482

> <r_psp_Receptor_Solv_GB>
-5206.55178036259

> <r_psp_Receptor_vdW>
-4023.31520084149

> <r_psp_MMGBSA_dG_Bind(NS)>
-46.0378899325078

> <r_psp_MMGBSA_dG_Bind(NS)_Coulomb>
2.44757190508972

> <r_psp_MMGBSA_dG_Bind(NS)_Covalent>
-0.000200868112187891

> <r_psp_MMGBSA_dG_Bind(NS)_Hbond>
-0.0823294500781913

> <r_psp_MMGBSA_dG_Bind(NS)_Lipo>
-25.3668717602673

> <r_psp_MMGBSA_dG_Bind(NS)_Packing>
0

> <r_psp_MMGBSA_dG_Bind(NS)_SelfCont>
0

> <r_psp_MMGBSA_dG_Bind(NS)_Solv_GB>
21.8503099089203

> <r_psp_MMGBSA_dG_Bind(NS)_vdW>
-44.8863696680555

> <r_psp_Rec_Strain_Energy>
-5.0931703299284e-011

> <r_psp_Rec_Strain_Coulomb>
4.00177668780088e-011

> <r_psp_Rec_Strain_Covalent>
-9.09494701772928e-013

> <r_psp_Rec_Strain_Hbond>
-2.27373675443232e-013

> <r_psp_Rec_Strain_Lipo>
-5.00222085975111e-012

> <r_psp_Rec_Strain_Packing>
4.9737991503207e-014

> <r_psp_Rec_Strain_SelfCont>
7.105427357601e-015

> <r_psp_Rec_Strain_Solv_GB>
-1.81898940354586e-012

> <r_psp_Rec_Strain_vdW>
4.54747350886464e-012

> <r_psp_Prime_MMGBSA_ligand_efficiency>
-1.67890272236982

> <r_psp_Prime_MMGBSA_ligand_efficiency_sa>
-2.51835408355473

> <r_psp_Prime_MMGBSA_ligand_efficiency_ln>
-9.94875644640638

> <r_i_glide_lipo>
-4.32358115682304

> <r_i_glide_hbond>
0

> <r_i_glide_metal>
0

> <r_i_glide_rewards>
-2.20685855697757

> <r_i_glide_erotb>
0.670929235356062

> <r_i_glide_esite>
0

> <i_psp_ExecuteFunction_Internal_Entry_Index>
1724

> <i_qp_#stars>
1

> <i_qp_#amine>
0

> <i_qp_#amidine>
0

> <i_qp_#acid>
0

> <i_qp_#amide>
0

> <i_qp_#rotor>
2

> <i_qp_#rtvFG>
0

> <i_qp_CNS>
-1

> <r_qp_mol_MW>
   335.448

> <r_qp_dipole>
     7.991

> <r_qp_SASA>
   665.276

> <r_qp_FOSA>
   401.238

> <r_qp_FISA>
    57.055

> <r_qp_PISA>
   206.983

> <r_qp_WPSA>
     0.000

> <r_qp_volume>
  1157.264

> <r_qp_donorHB>
     3.000

> <r_qp_accptHB>
     2.500

> <r_qp_dip^2/V>
   0.0551729

> <r_qp_ACxDN^.5/SA>
   0.0065088

> <r_qp_glob>
   0.8012807

> <r_qp_QPpolrz>
    40.852

> <r_qp_QPlogPC16>
    11.516

> <r_qp_QPlogPoct>
    19.505

> <r_qp_QPlogPw>
     9.532

> <r_qp_QPlogPo/w>
     4.864

> <r_qp_QPlogS>
    -6.598

> <r_qp_CIQPlogS>
    -5.546

> <r_qp_QPlogHERG>
    -5.735

> <r_qp_QPPCaco>
  2850.030

> <r_qp_QPlogBB>
    -0.149

> <r_qp_QPPMDCK>
  1534.576

> <r_qp_QPlogKp>
    -1.650

> <r_qp_IP(eV)>
     7.926

> <r_qp_EA(eV)>
     0.502

> <i_qp_#metab>
3

> <r_qp_QPlogKhsa>
     0.952

> <i_qp_HumanOralAbsorption>
1

> <r_qp_PercentHumanOralAbsorption>
   100.000

> <r_qp_SAfluorine>
     0.000

> <r_qp_SAamideO>
     0.000

> <r_qp_PSA>
    59.510

> <i_qp_#NandO>
4

> <i_qp_RuleOfFive>
0

> <i_qp_RuleOfThree>
1

> <i_qp_#ringatoms>
20

> <i_qp_#in34>
0

> <i_qp_#in56>
20

> <i_qp_#noncon>
6

> <i_qp_#nonHatm>
25

> <r_qp_Jm>
0.00173926207954805

> <s_m_subgroupid>
100str_copy1

> <s_m_subgroup_title>
100str

> <b_m_subgroup_collapsed>
0

$$$$
ind_1,505957
                    3D
 Structure written by MMmdl.
 52 54  0  0  1  0            999 V2000
   -3.3599   -1.6975   -0.7336 C   0  0  0  0  0  0
   -2.3258   -0.7719   -0.5547 C   0  0  0  0  0  0
   -0.9846   -1.1676   -0.2818 C   0  0  0  0  0  0
   -0.6976   -2.5396   -0.1761 C   0  0  0  0  0  0
   -1.7267   -3.4632   -0.3517 C   0  0  0  0  0  0
   -3.0268   -3.0479   -0.6263 C   0  0  0  0  0  0
   -0.2088    0.0403   -0.1751 C   0  0  0  0  0  0
   -1.0725    1.1202   -0.3409 C   0  0  0  0  0  0
   -2.3295    0.6054   -0.5894 N   0  0  0  0  0  0
   -0.7524    2.5315   -0.3380 C   0  0  0  0  0  0
   -1.8154    3.3615   -0.3403 N   0  0  0  0  0  0
    0.4161    2.9217   -0.3417 O   0  0  0  0  0  0
   -1.7557    4.8247   -0.3200 C   0  0  0  0  0  0
   -3.0611    5.4892   -0.8205 C   0  0  0  0  0  0
   -3.0253    7.0298   -0.7836 C   0  0  0  0  0  0
   -2.5958    7.5688    0.5906 C   0  0  0  0  0  0
   -1.2422    6.9807    1.0207 C   0  0  0  0  0  0
   -1.2437    5.4393    1.0107 C   0  0  0  0  0  0
   -4.3737   -1.3901   -0.9436 H   0  0  0  0  0  0
    0.3034   -2.8813    0.0407 H   0  0  0  0  0  0
   -1.5124   -4.5191   -0.2729 H   0  0  0  0  0  0
   -3.7990   -3.7919   -0.7570 H   0  0  0  0  0  0
   -3.1243    1.2020   -0.7671 H   0  0  0  0  0  0
   -2.7350    2.9586   -0.2399 H   0  0  0  0  0  0
   -1.0118    5.1077   -1.0698 H   0  0  0  0  0  0
   -3.2875    5.1592   -1.8357 H   0  0  0  0  0  0
   -3.8886    5.1601   -0.1895 H   0  0  0  0  0  0
   -2.3349    7.3931   -1.5466 H   0  0  0  0  0  0
   -4.0050    7.4296   -1.0487 H   0  0  0  0  0  0
   -2.5353    8.6574    0.5612 H   0  0  0  0  0  0
   -3.3558    7.3244    1.3346 H   0  0  0  0  0  0
   -0.4612    7.3444    0.3510 H   0  0  0  0  0  0
   -0.9797    7.3434    2.0154 H   0  0  0  0  0  0
   -1.8857    5.0990    1.8248 H   0  0  0  0  0  0
   -0.2370    5.0834    1.2344 H   0  0  0  0  0  0
    3.5818    1.5252   -0.7773 C   0  0  0  0  0  0
    3.4317   -0.0135   -0.7783 C   0  0  0  0  0  0
    4.2663   -0.5990   -1.9397 C   0  0  0  0  0  0
    3.9580   -0.5847    0.5585 C   0  0  0  0  0  0
    1.9449   -0.4048   -0.9775 C   0  0  0  0  0  0
    1.1364    0.1266    0.0704 O   0  0  0  0  0  0
    4.6269    1.8263   -0.6926 H   0  0  0  0  0  0
    3.0477    1.9811    0.0575 H   0  0  0  0  0  0
    3.1881    1.9666   -1.6941 H   0  0  0  0  0  0
    3.9357   -0.2130   -2.9052 H   0  0  0  0  0  0
    4.1884   -1.6864   -1.9811 H   0  0  0  0  0  0
    5.3244   -0.3532   -1.8377 H   0  0  0  0  0  0
    5.0124   -0.3475    0.7080 H   0  0  0  0  0  0
    3.8601   -1.6706    0.5961 H   0  0  0  0  0  0
    3.4126   -0.1800    1.4123 H   0  0  0  0  0  0
    1.5957   -0.0388   -1.9467 H   0  0  0  0  0  0
    1.8487   -1.4912   -1.0031 H   0  0  0  0  0  0
  1  2  2  0  0  0
  1  6  1  0  0  0
  1 19  1  0  0  0
  2  3  1  0  0  0
  2  9  1  0  0  0
  3  4  2  0  0  0
  3  7  1  0  0  0
  4  5  1  0  0  0
  4 20  1  0  0  0
  5  6  2  0  0  0
  5 21  1  0  0  0
  6 22  1  0  0  0
  7  8  2  0  0  0
  7 41  1  0  0  0
  8  9  1  0  0  0
  8 10  1  0  0  0
  9 23  1  0  0  0
 10 11  1  0  0  0
 10 12  2  0  0  0
 11 13  1  0  0  0
 11 24  1  0  0  0
 13 18  1  0  0  0
 13 14  1  0  0  0
 13 25  1  0  0  0
 14 15  1  0  0  0
 14 26  1  0  0  0
 14 27  1  0  0  0
 15 16  1  0  0  0
 15 28  1  0  0  0
 15 29  1  0  0  0
 16 17  1  0  0  0
 16 30  1  0  0  0
 16 31  1  0  0  0
 17 18  1  0  0  0
 17 32  1  0  0  0
 17 33  1  0  0  0
 18 34  1  0  0  0
 18 35  1  0  0  0
 36 37  1  0  0  0
 36 42  1  0  0  0
 36 43  1  0  0  0
 36 44  1  0  0  0
 37 38  1  0  0  0
 37 39  1  0  0  0
 37 40  1  0  0  0
 38 45  1  0  0  0
 38 46  1  0  0  0
 38 47  1  0  0  0
 39 48  1  0  0  0
 39 49  1  0  0  0
 39 50  1  0  0  0
 40 41  1  0  0  0
 40 51  1  0  0  0
 40 52  1  0  0  0
M  END
> <s_m_entry_id>
8127

> <s_m_entry_name>
entry

> <i_f3d_flags>
0

> <s_m_job_name>
adme_1000

> <r_psp_Prime_Energy>
-34113.0355042818

> <r_psp_Prime_Solv_GB>
-5188.57766854976

> <r_psp_Prime_Coulomb>
-26463.1057129782

> <r_psp_Prime_vdW>
-4056.21637847196

> <r_psp_Prime_Covalent>
4419.35347572924

> <i_psp_model_num>
0

> <r_psp_Prime_Lipo>
-2178.10477991105

> <s_psp_Prime_Energy_Force_Field>
S-OPLS

> <s_psp_Prime_Energy_Solvent_Model>
VSGB2.1

> <r_psp_Prime_Hbond>
-550.131906112574

> <r_psp_Prime_Packing>
-55.8446424272089

> <r_psp_Prime_SelfCont>
-40.4078915603482

> <r_psp_Memb1_x>
103.457542316003

> <r_psp_Memb1_y>
39.4731108300965

> <r_psp_Memb1_z>
48.7987221124676

> <r_psp_Memb2_x>
99.8134167309003

> <r_psp_Memb2_y>
2.81176945184187

> <r_psp_Memb2_z>
23.8404289603493

> <r_psp_MembDummyRadius>
4.45

> <r_psp_Prime_Bond_Covalent>
467.851722253155

> <r_psp_Prime_Bond_SGB>
49970.7314419288

> <r_psp_Prime_Angle_Covalent>
2223.70581106162

> <r_psp_Prime_Angle_SGB>
-21652.1860214382

> <r_psp_Prime_Torsion_Covalent>
1727.79594241447

> <r_psp_Prime_NB14_LJ>
4241.81333394227

> <r_psp_Prime_NB14_Lipo>
0

> <r_psp_Prime_NB14_Elec>
25564.4556053046

> <r_psp_Prime_NB14_SGB>
-15624.1266567888

> <r_psp_Prime_NBShort_LJ>
-7883.24897062167

> <r_psp_Prime_NBShort_Lipo>
-2178.10477991105

> <r_psp_Prime_NBShort_Elec>
-53044.1533914053

> <r_psp_Prime_NBShort_SGB>
18022.5010545208

> <r_psp_Prime_NBLong_LJ>
-414.780741792547

> <r_psp_Prime_NBLong_Lipo>
0

> <r_psp_Prime_NBLong_Elec>
1016.59207312249

> <r_psp_Prime_NBLong_SGB>
-1164.5473296383

> <r_psp_Prime_Self_SGB>
-34740.9501571341

> <s_m_Source_Path>
F:\Dekstop_files\DAC4,5\Molecular Systems Desgn and Engineering\supplementary_str

> <s_m_Source_File>
1000_str.mae

> <i_m_Source_File_Index>
927

> <i_lp_mmshare_version>
53156

> <s_epik_input>
W2NIXTFbY0hdW2NIXVtjSF1jKGMxMiljKE9bQ0gyXUMoW0NIM10pKFtDSDNdKVtDSDNdKWMoW25IXTIpQyg9TylbTkhdW0NIXTNbQ0gyXVtDSDJdW0NIMl1bQ0gyXVtDSDJdMw==

> <s_epik_cmdline>
J2VwaWtfcHl0aG9uJywgJy1waHQnLCAnMC4wJywgJy1waCcsICc3LjAnLCAnLXRuJywgJzgnLCAnLW1hJywgJzUwMCcsICctaW1hZScsICc8aW5maWxlLm1hZT4nLCAnLW9tYWUnLCAnPG91dGZpbGUubWFlPic=

> <r_lp_tautomer_probability>
1

> <r_epik_Ionization_Penalty>
  0.0000

> <r_epik_Ionization_Penalty_Charging>
  0.0000

> <r_epik_Ionization_Penalty_Neutral>
  0.0000

> <r_epik_State_Penalty>
  0.0000

> <r_epik_Charging_Adjusted_Penalty>
0

> <i_epik_Tot_Q>
0

> <i_epik_Tot_abs_Q>
0

> <s_lp_Force_Field>
S-OPLS

> <r_lp_Energy>
36.036262

> <b_lp_Chiralities_Consistent>
1

> <s_lp_Variant>
ind_1,505957-1

> <s_i_glide_gridfile>
glide-grid_mmpl3

> <i_i_glide_lignum>
2344

> <i_i_glide_rotatable_bonds>
6

> <r_i_docking_score>
-7.87429208941449

> <r_i_glide_ligand_efficiency>
-0.328095503725604

> <r_i_glide_ligand_efficiency_sa>
-0.946391197533529

> <r_i_glide_ligand_efficiency_ln>
-1.88467942471644

> <r_i_glide_gscore>
-7.87429208941449

> <r_i_glide_evdw>
-37.5748405456543

> <r_i_glide_ecoul>
-1.06293916702271

> <r_i_glide_energy>
-38.637779712677

> <r_i_glide_einternal>
3.48946762084961

> <r_i_glide_emodel>
-53.8683840616607

> <i_i_glide_confnum>
90

> <i_i_glide_posenum>
307

> <r_i_glide_eff_state_penalty>
0

> <i_rge_num_r_groups>
1

> <r_rge_occupation_R1>
1

> <s_rge_R1>
505957

> <s_rge_R1_s_m_title>
505957

> <s_rge_R1_s_m_entry_id>
17912

> <s_rge_R1_s_m_entry_name>
eMol_BB_r-groups.963

> <s_rge_R1_s_m_smiles>
[*]OCC(C)(C)C

> <b_rge_R1_b_sd_chiral_flag>
0

> <i_rge_R1_i_sd_version>
0

> <s_rge_R1_s_m_Source_File>
eMol_BB_r-groups-dedup.mae

> <i_rge_R1_i_m_Source_File_Index>
797

> <s_rge_R1_s_m_Source_Path>
/Users/konze/projects/pathfinder/r-groups

> <s_rge_R1_s_sd_Source_Path>
/Users/konze/projects/pathfinder/reactant sets/eMolecules

> <s_rge_R1_s_sd_Source_File>
eMol BB r-groups.mae

> <i_rge_R1_i_sd_Source_File_Index>
963

> <r_rge_R1_r_sd_MW>
88.1482

> <i_rge_R1_i_sd_RB>
1

> <i_rge_R1_i_sd_HeavyAtomCount>
6

> <i_rge_R1_i_sd_HBA>
1

> <i_rge_R1_i_sd_HBD>
1

> <r_rge_R1_r_sd_PSA>
20.23

> <i_rge_R1_i_sd_ChiralCenterCount>
0

> <i_rge_R1_i_sd_ChiralCenterCountAllPossible>
0

> <i_rge_R1_i_sd_RingCount>
0

> <r_rge_R1_r_sd_AlogP>
1.1075

> <s_rge_R1_s_sd_subgroup_title>
eMol BB r-groups

> <s_rge_R1_s_sd_subgroupid>
eMol BB r-groups

> <i_rge_R1_i_sd_subgroup_collapsed>
0

> <s_rge_R1_s_sd_Unique_SMILES_Stereo>
CC(C)(C)CO

> <i_rge_R1_i_sd_canvasUID>
904

> <s_rge_R1_s_canvas_Unique_SMILES_Stereo>
CC(C)(C)CO

> <s_psp_Prime_MMGBSA_Input_Structure_Hash>
95b2c9cb351ed605e63602e411c331da4763252bdea44668a66d5807

> <i_psp_number_heavy_atoms>
24

> <r_psp_MMGBSA_dG_Bind>
-43.7737640821579

> <r_psp_MMGBSA_dG_Bind_Coulomb>
-4.31361436695079

> <r_psp_MMGBSA_dG_Bind_Covalent>
3.39444567008195

> <r_psp_MMGBSA_dG_Bind_Hbond>
-0.0343010293935322

> <r_psp_MMGBSA_dG_Bind_Lipo>
-25.7916684100219

> <r_psp_MMGBSA_dG_Bind_Packing>
4.9737991503207e-014

> <r_psp_MMGBSA_dG_Bind_SelfCont>
7.105427357601e-015

> <r_psp_MMGBSA_dG_Bind_Solv_GB>
27.3595234546838

> <r_psp_MMGBSA_dG_Bind_vdW>
-44.3881494004722

> <r_psp_Lig_Strain_Energy>
8.82202334254215

> <r_psp_Lig_Strain_Coulomb>
1.57138987767607

> <r_psp_Lig_Strain_Covalent>
3.39464653819495

> <r_psp_Lig_Strain_Hbond>
0

> <r_psp_Lig_Strain_Lipo>
-0.306000858841178

> <r_psp_Lig_Strain_Packing>
0

> <r_psp_Lig_Strain_SelfCont>
0

> <r_psp_Lig_Strain_Solv_GB>
-1.63044695068406

> <r_psp_Lig_Strain_vdW>
5.79243473619636

> <r_psp_Ligand_Energy>
25.9893005341147

> <r_psp_Ligand_Coulomb>
0.123715331763545

> <r_psp_Ligand_Covalent>
25.5525042377478

> <r_psp_Ligand_Hbond>
0

> <r_psp_Ligand_Lipo>
-1.78847916354727

> <r_psp_Ligand_Packing>
0

> <r_psp_Ligand_SelfCont>
0

> <r_psp_Ligand_Solv_GB>
-9.38541164185635

> <r_psp_Ligand_vdW>
11.486971770007

> <r_psp_Complex_Energy>
-34113.0355042818

> <r_psp_Complex_Coulomb>
-26463.1057129782

> <r_psp_Complex_Covalent>
4419.35347572924

> <r_psp_Complex_Hbond>
-550.131906112574

> <r_psp_Complex_Lipo>
-2178.10477991105

> <r_psp_Complex_Packing>
-55.8446424272089

> <r_psp_Complex_SelfCont>
-40.4078915603482

> <r_psp_Complex_Solv_GB>
-5188.57766854976

> <r_psp_Complex_vdW>
-4056.21637847196

> <r_psp_Receptor_Energy>
-34095.2510407338

> <r_psp_Receptor_Coulomb>
-26458.915813943

> <r_psp_Receptor_Covalent>
4390.40652582141

> <r_psp_Receptor_Hbond>
-550.097605083181

> <r_psp_Receptor_Lipo>
-2150.52463233748

> <r_psp_Receptor_Packing>
-55.8446424272089

> <r_psp_Receptor_SelfCont>
-40.4078915603482

> <r_psp_Receptor_Solv_GB>
-5206.55178036259

> <r_psp_Receptor_vdW>
-4023.31520084149

> <r_psp_MMGBSA_dG_Bind(NS)>
-52.5957874246524

> <r_psp_MMGBSA_dG_Bind(NS)_Coulomb>
-5.88500424466838

> <r_psp_MMGBSA_dG_Bind(NS)_Covalent>
-0.000200868112187891

> <r_psp_MMGBSA_dG_Bind(NS)_Hbond>
-0.0343010293933048

> <r_psp_MMGBSA_dG_Bind(NS)_Lipo>
-25.485667551176

> <r_psp_MMGBSA_dG_Bind(NS)_Packing>
0

> <r_psp_MMGBSA_dG_Bind(NS)_SelfCont>
0

> <r_psp_MMGBSA_dG_Bind(NS)_Solv_GB>
28.9899704053696

> <r_psp_MMGBSA_dG_Bind(NS)_vdW>
-50.1805841366731

> <r_psp_Rec_Strain_Energy>
-5.0931703299284e-011

> <r_psp_Rec_Strain_Coulomb>
4.00177668780088e-011

> <r_psp_Rec_Strain_Covalent>
-9.09494701772928e-013

> <r_psp_Rec_Strain_Hbond>
-2.27373675443232e-013

> <r_psp_Rec_Strain_Lipo>
-5.00222085975111e-012

> <r_psp_Rec_Strain_Packing>
4.9737991503207e-014

> <r_psp_Rec_Strain_SelfCont>
7.105427357601e-015

> <r_psp_Rec_Strain_Solv_GB>
-1.81898940354586e-012

> <r_psp_Rec_Strain_vdW>
4.54747350886464e-012

> <r_psp_Prime_MMGBSA_ligand_efficiency>
-1.82390683675658

> <r_psp_Prime_MMGBSA_ligand_efficiency_sa>
-2.73586025513487

> <r_psp_Prime_MMGBSA_ligand_efficiency_ln>
-10.4770703920089

> <r_i_glide_lipo>
-4.86248567392417

> <r_i_glide_hbond>
0

> <r_i_glide_metal>
0

> <r_i_glide_rewards>
-1.84412623314754

> <r_i_glide_erotb>
0.87050271999333

> <r_i_glide_esite>
0

> <i_psp_ExecuteFunction_Internal_Entry_Index>
1983

> <i_qp_#stars>
0

> <i_qp_#amine>
0

> <i_qp_#amidine>
0

> <i_qp_#acid>
0

> <i_qp_#amide>
0

> <i_qp_#rotor>
5

> <i_qp_#rtvFG>
0

> <i_qp_CNS>
0

> <r_qp_mol_MW>
   328.453

> <r_qp_dipole>
     6.613

> <r_qp_SASA>
   658.233

> <r_qp_FOSA>
   446.400

> <r_qp_FISA>
    39.863

> <r_qp_PISA>
   171.969

> <r_qp_WPSA>
     0.000

> <r_qp_volume>
  1159.616

> <r_qp_donorHB>
     2.000

> <r_qp_accptHB>
     3.250

> <r_qp_dip^2/V>
   0.0377151

> <r_qp_ACxDN^.5/SA>
   0.0069826

> <r_qp_glob>
   0.8109517

> <r_qp_QPpolrz>
    38.686

> <r_qp_QPlogPC16>
    10.936

> <r_qp_QPlogPoct>
    17.256

> <r_qp_QPlogPw>
     7.772

> <r_qp_QPlogPo/w>
     4.913

> <r_qp_QPlogS>
    -6.070

> <r_qp_CIQPlogS>
    -4.982

> <r_qp_QPlogHERG>
    -5.411

> <r_qp_QPPCaco>
  4148.358

> <r_qp_QPlogBB>
    -0.142

> <r_qp_QPPMDCK>
  2302.507

> <r_qp_QPlogKp>
    -1.168

> <r_qp_IP(eV)>
     8.378

> <r_qp_EA(eV)>
     0.464

> <i_qp_#metab>
1

> <r_qp_QPlogKhsa>
     0.836

> <i_qp_HumanOralAbsorption>
3

> <r_qp_PercentHumanOralAbsorption>
   100.000

> <r_qp_SAfluorine>
     0.000

> <r_qp_SAamideO>
     0.000

> <r_qp_PSA>
    56.241

> <i_qp_#NandO>
4

> <i_qp_RuleOfFive>
0

> <i_qp_RuleOfThree>
1

> <i_qp_#ringatoms>
15

> <i_qp_#in34>
0

> <i_qp_#in56>
15

> <i_qp_#noncon>
6

> <i_qp_#nonHatm>
24

> <r_qp_Jm>
0.0189822091790161

> <s_m_subgroupid>
100str_copy1

> <s_m_subgroup_title>
100str

> <b_m_subgroup_collapsed>
0

$$$$
ind_1,537068
                    3D
 Structure written by MMmdl.
 50 53  0  0  1  0            999 V2000
   -3.2855    1.7277   -0.3133 C   0  0  0  0  0  0
   -2.2328    0.8130   -0.1979 C   0  0  0  0  0  0
   -0.8679    1.2155   -0.1537 C   0  0  0  0  0  0
   -0.5744    2.5884   -0.2383 C   0  0  0  0  0  0
   -1.6197    3.5026   -0.3557 C   0  0  0  0  0  0
   -2.9448    3.0779   -0.3916 C   0  0  0  0  0  0
   -0.0702    0.0217   -0.0270 C   0  0  0  0  0  0
   -0.9549   -1.0653   -0.0226 C   0  0  0  0  0  0
   -2.2364   -0.5589   -0.1035 N   0  0  0  0  0  0
   -0.6737   -2.4774    0.1480 C   0  0  0  0  0  0
   -1.6453   -3.3062   -0.2856 N   0  0  0  0  0  0
    0.3870   -2.8692    0.6364 O   0  0  0  0  0  0
   -1.6120   -4.7691   -0.2296 C   0  0  0  0  0  0
   -1.6793   -5.3754    1.1979 C   0  0  0  0  0  0
   -1.6928   -6.9167    1.2153 C   0  0  0  0  0  0
   -2.7638   -7.5026    0.2812 C   0  0  0  0  0  0
   -2.6014   -6.9731   -1.1526 C   0  0  0  0  0  0
   -2.6089   -5.4329   -1.2101 C   0  0  0  0  0  0
   -4.3180    1.4122   -0.3430 H   0  0  0  0  0  0
    0.4475    2.9366   -0.2143 H   0  0  0  0  0  0
   -1.3986    4.5580   -0.4205 H   0  0  0  0  0  0
   -3.7300    3.8139   -0.4838 H   0  0  0  0  0  0
   -3.0476   -1.1597   -0.0877 H   0  0  0  0  0  0
   -2.5100   -2.8991   -0.6090 H   0  0  0  0  0  0
   -0.6307   -5.0613   -0.6127 H   0  0  0  0  0  0
   -0.8436   -5.0229    1.8034 H   0  0  0  0  0  0
   -2.5906   -5.0260    1.6855 H   0  0  0  0  0  0
   -0.7113   -7.2885    0.9167 H   0  0  0  0  0  0
   -1.8528   -7.2737    2.2334 H   0  0  0  0  0  0
   -2.7044   -8.5916    0.2845 H   0  0  0  0  0  0
   -3.7566   -7.2492    0.6561 H   0  0  0  0  0  0
   -1.6646   -7.3448   -1.5708 H   0  0  0  0  0  0
   -3.3942   -7.3711   -1.7874 H   0  0  0  0  0  0
   -3.6185   -5.0954   -0.9688 H   0  0  0  0  0  0
   -2.4037   -5.1103   -2.2321 H   0  0  0  0  0  0
    1.8807    1.6536    2.0824 C   0  0  0  0  0  0
    2.1959    0.6955    0.9559 C   0  0  0  0  0  0
    1.3880   -0.0071    0.0619 C   0  0  0  0  0  0
    2.2461   -0.7563   -0.7574 C   0  0  0  0  0  0
    3.5586   -0.5243   -0.3789 C   0  0  0  0  0  0
    4.8743   -1.0557   -0.8939 C   0  0  0  0  0  0
    3.4955    0.3638    0.6632 N   0  0  0  0  0  0
    4.3006    0.7220    1.1564 H   0  0  0  0  0  0
    0.8150    1.6813    2.3101 H   0  0  0  0  0  0
    2.1850    2.6718    1.8397 H   0  0  0  0  0  0
    2.3922    1.3756    3.0042 H   0  0  0  0  0  0
    1.9328   -1.4131   -1.5557 H   0  0  0  0  0  0
    4.7358   -1.7192   -1.7478 H   0  0  0  0  0  0
    5.4051   -1.6234   -0.1292 H   0  0  0  0  0  0
    5.5364   -0.2516   -1.2160 H   0  0  0  0  0  0
  1  2  2  0  0  0
  1  6  1  0  0  0
  1 19  1  0  0  0
  2  3  1  0  0  0
  2  9  1  0  0  0
  3  4  2  0  0  0
  3  7  1  0  0  0
  4  5  1  0  0  0
  4 20  1  0  0  0
  5  6  2  0  0  0
  5 21  1  0  0  0
  6 22  1  0  0  0
  7  8  2  0  0  0
  7 38  1  0  0  0
  8  9  1  0  0  0
  8 10  1  0  0  0
  9 23  1  0  0  0
 10 11  1  0  0  0
 10 12  2  0  0  0
 11 13  1  0  0  0
 11 24  1  0  0  0
 13 18  1  0  0  0
 13 14  1  0  0  0
 13 25  1  0  0  0
 14 15  1  0  0  0
 14 26  1  0  0  0
 14 27  1  0  0  0
 15 16  1  0  0  0
 15 28  1  0  0  0
 15 29  1  0  0  0
 16 17  1  0  0  0
 16 30  1  0  0  0
 16 31  1  0  0  0
 17 18  1  0  0  0
 17 32  1  0  0  0
 17 33  1  0  0  0
 18 34  1  0  0  0
 18 35  1  0  0  0
 36 37  1  0  0  0
 36 44  1  0  0  0
 36 45  1  0  0  0
 36 46  1  0  0  0
 37 42  1  0  0  0
 37 38  2  0  0  0
 38 39  1  0  0  0
 39 40  2  0  0  0
 39 47  1  0  0  0
 40 41  1  0  0  0
 40 42  1  0  0  0
 41 48  1  0  0  0
 41 49  1  0  0  0
 41 50  1  0  0  0
 42 43  1  0  0  0
M  END
> <s_m_entry_id>
8161

> <s_m_entry_name>
entry

> <i_f3d_flags>
0

> <s_m_job_name>
adme_1000

> <r_psp_Prime_Energy>
-34131.6806518118

> <r_psp_Prime_Solv_GB>
-5185.41403757213

> <r_psp_Prime_Coulomb>
-26478.9490612011

> <r_psp_Prime_vdW>
-4065.18367051909

> <r_psp_Prime_Covalent>
4422.81950067072

> <i_psp_model_num>
0

> <r_psp_Prime_Lipo>
-2178.58819187199

> <s_psp_Prime_Energy_Force_Field>
S-OPLS

> <s_psp_Prime_Energy_Solvent_Model>
VSGB2.1

> <r_psp_Prime_Hbond>
-550.112657330601

> <r_psp_Prime_Packing>
-55.8446424272089

> <r_psp_Prime_SelfCont>
-40.4078915603482

> <r_psp_Memb1_x>
103.457542316003

> <r_psp_Memb1_y>
39.4731108300965

> <r_psp_Memb1_z>
48.7987221124676

> <r_psp_Memb2_x>
99.8134167309003

> <r_psp_Memb2_y>
2.81176945184187

> <r_psp_Memb2_z>
23.8404289603493

> <r_psp_MembDummyRadius>
4.45

> <r_psp_Prime_Bond_Covalent>
467.267272467835

> <r_psp_Prime_Bond_SGB>
49973.0682539346

> <r_psp_Prime_Angle_Covalent>
2224.02260845981

> <r_psp_Prime_Angle_SGB>
-21652.4677777501

> <r_psp_Prime_Torsion_Covalent>
1731.52961974308

> <r_psp_Prime_NB14_LJ>
4236.84166406939

> <r_psp_Prime_NB14_Lipo>
0

> <r_psp_Prime_NB14_Elec>
25556.6806970676

> <r_psp_Prime_NB14_SGB>
-15623.3622823637

> <r_psp_Prime_NBShort_LJ>
-7886.70719561708

> <r_psp_Prime_NBShort_Lipo>
-2178.58819187199

> <r_psp_Prime_NBShort_Elec>
-53053.5996534213

> <r_psp_Prime_NBShort_SGB>
18023.351412791

> <r_psp_Prime_NBLong_LJ>
-415.3181389714

> <r_psp_Prime_NBLong_Lipo>
0

> <r_psp_Prime_NBLong_Elec>
1017.96989515248

> <r_psp_Prime_NBLong_SGB>
-1160.65819465106

> <r_psp_Prime_Self_SGB>
-34745.3454495328

> <s_m_Source_Path>
F:\Dekstop_files\DAC4,5\Molecular Systems Desgn and Engineering\supplementary_str

> <s_m_Source_File>
1000_str.mae

> <i_m_Source_File_Index>
893

> <i_lp_mmshare_version>
53156

> <s_epik_input>
W2NIXTFbY0hdW2NIXVtjSF1jKGMxMiljKC1jKGMzW0NIM10pW2NIXWMoW0NIM10pW25IXTMpYyhbbkhdMilDKD1PKVtOSF1bQ0hdNFtDSDJdW0NIMl1bQ0gyXVtDSDJdW0NIMl00

> <s_epik_cmdline>
J2VwaWtfcHl0aG9uJywgJy1waHQnLCAnMC4wJywgJy1waCcsICc3LjAnLCAnLXRuJywgJzgnLCAnLW1hJywgJzUwMCcsICctaW1hZScsICc8aW5maWxlLm1hZT4nLCAnLW9tYWUnLCAnPG91dGZpbGUubWFlPic=

> <r_lp_tautomer_probability>
1

> <r_epik_Ionization_Penalty>
  0.0000

> <r_epik_Ionization_Penalty_Charging>
  0.0000

> <r_epik_Ionization_Penalty_Neutral>
  0.0000

> <r_epik_State_Penalty>
  0.0000

> <r_epik_Charging_Adjusted_Penalty>
0

> <i_epik_Tot_Q>
0

> <i_epik_Tot_abs_Q>
0

> <s_lp_Force_Field>
S-OPLS

> <r_lp_Energy>
33.448203

> <b_lp_Chiralities_Consistent>
1

> <s_lp_Variant>
ind_1,537068-1

> <s_i_glide_gridfile>
glide-grid_mmpl3

> <i_i_glide_lignum>
1149

> <i_i_glide_rotatable_bonds>
4

> <r_i_docking_score>
-8.55142481901666

> <r_i_glide_ligand_efficiency>
-0.342056992760667

> <r_i_glide_ligand_efficiency_sa>
-1.00018071323879

> <r_i_glide_ligand_efficiency_ln>
-2.02694394762942

> <r_i_glide_gscore>
-8.55142481901666

> <r_i_glide_evdw>
-42.8244438171387

> <r_i_glide_ecoul>
-1.44241857528687

> <r_i_glide_energy>
-44.2668623924255

> <r_i_glide_einternal>
2.44095635414124

> <r_i_glide_emodel>
-63.0370486738415

> <i_i_glide_confnum>
57

> <i_i_glide_posenum>
184

> <r_i_glide_eff_state_penalty>
0

> <i_rge_num_r_groups>
1

> <r_rge_occupation_R1>
1

> <s_rge_R1>
537068

> <s_rge_R1_s_m_title>
537068

> <s_rge_R1_s_m_entry_id>
16912

> <s_rge_R1_s_m_entry_name>
eMol_BB_r-groups.494

> <s_rge_R1_s_m_smiles>
[*]c1c(C)[nH]c(C)c1

> <b_rge_R1_b_sd_chiral_flag>
0

> <i_rge_R1_i_sd_version>
0

> <s_rge_R1_s_m_Source_File>
eMol_BB_r-groups-dedup.mae

> <i_rge_R1_i_m_Source_File_Index>
380

> <s_rge_R1_s_m_Source_Path>
/Users/konze/projects/pathfinder/r-groups

> <s_rge_R1_s_sd_Source_Path>
/Users/konze/projects/pathfinder/reactant sets/eMolecules

> <s_rge_R1_s_sd_Source_File>
eMol BB r-groups.mae

> <i_rge_R1_i_sd_Source_File_Index>
494

> <r_rge_R1_r_sd_MW>
95.1424

> <i_rge_R1_i_sd_RB>
0

> <i_rge_R1_i_sd_HeavyAtomCount>
7

> <i_rge_R1_i_sd_HBA>
0

> <i_rge_R1_i_sd_HBD>
1

> <r_rge_R1_r_sd_PSA>
15.79

> <i_rge_R1_i_sd_ChiralCenterCount>
0

> <i_rge_R1_i_sd_ChiralCenterCountAllPossible>
0

> <i_rge_R1_i_sd_RingCount>
1

> <r_rge_R1_r_sd_AlogP>
0.836

> <s_rge_R1_s_sd_subgroup_title>
eMol BB r-groups

> <s_rge_R1_s_sd_subgroupid>
eMol BB r-groups

> <i_rge_R1_i_sd_subgroup_collapsed>
0

> <s_rge_R1_s_sd_Unique_SMILES_Stereo>
Cc1ccc(C)[nH]1

> <i_rge_R1_i_sd_canvasUID>
438

> <s_rge_R1_s_canvas_Unique_SMILES_Stereo>
Cc1ccc(C)[nH]1

> <s_psp_Prime_MMGBSA_Input_Structure_Hash>
147b4990d30c8d60f0fa92bf0f77d7b17ebc919b637e7888c82c543a

> <i_psp_number_heavy_atoms>
25

> <r_psp_MMGBSA_dG_Bind>
-45.037950569953

> <r_psp_MMGBSA_dG_Bind_Coulomb>
-4.18939710525228

> <r_psp_MMGBSA_dG_Bind_Covalent>
5.21793270596572

> <r_psp_MMGBSA_dG_Bind_Hbond>
-0.0150522474197032

> <r_psp_MMGBSA_dG_Bind_Lipo>
-25.9069640855332

> <r_psp_MMGBSA_dG_Bind_Packing>
4.9737991503207e-014

> <r_psp_MMGBSA_dG_Bind_SelfCont>
7.105427357601e-015

> <r_psp_MMGBSA_dG_Bind_Solv_GB>
31.1120909301799

> <r_psp_MMGBSA_dG_Bind_vdW>
-51.2565607677934

> <r_psp_Lig_Strain_Energy>
6.68579360569345

> <r_psp_Lig_Strain_Coulomb>
1.42980523459779

> <r_psp_Lig_Strain_Covalent>
5.21813357407941

> <r_psp_Lig_Strain_Hbond>
0

> <r_psp_Lig_Strain_Lipo>
0.111152249826881

> <r_psp_Lig_Strain_Packing>
0

> <r_psp_Lig_Strain_SelfCont>
0

> <r_psp_Lig_Strain_Solv_GB>
-0.555261249313006

> <r_psp_Lig_Strain_vdW>
0.481963796502352

> <r_psp_Ligand_Energy>
8.60833949196997

> <r_psp_Ligand_Coulomb>
-15.8438501528859

> <r_psp_Ligand_Covalent>
27.1950421433497

> <r_psp_Ligand_Hbond>
0

> <r_psp_Ligand_Lipo>
-2.1565954489721

> <r_psp_Ligand_Packing>
0

> <r_psp_Ligand_SelfCont>
0

> <r_psp_Ligand_Solv_GB>
-9.97434813971508

> <r_psp_Ligand_vdW>
9.38809109019334

> <r_psp_Complex_Energy>
-34131.6806518118

> <r_psp_Complex_Coulomb>
-26478.9490612011

> <r_psp_Complex_Covalent>
4422.81950067072

> <r_psp_Complex_Hbond>
-550.112657330601

> <r_psp_Complex_Lipo>
-2178.58819187199

> <r_psp_Complex_Packing>
-55.8446424272089

> <r_psp_Complex_SelfCont>
-40.4078915603482

> <r_psp_Complex_Solv_GB>
-5185.41403757213

> <r_psp_Complex_vdW>
-4065.18367051909

> <r_psp_Receptor_Energy>
-34095.2510407338

> <r_psp_Receptor_Coulomb>
-26458.915813943

> <r_psp_Receptor_Covalent>
4390.40652582141

> <r_psp_Receptor_Hbond>
-550.097605083181

> <r_psp_Receptor_Lipo>
-2150.52463233748

> <r_psp_Receptor_Packing>
-55.8446424272089

> <r_psp_Receptor_SelfCont>
-40.4078915603482

> <r_psp_Receptor_Solv_GB>
-5206.55178036259

> <r_psp_Receptor_vdW>
-4023.31520084149

> <r_psp_MMGBSA_dG_Bind(NS)>
-51.7237441755933

> <r_psp_MMGBSA_dG_Bind(NS)_Coulomb>
-5.61920233989076

> <r_psp_MMGBSA_dG_Bind(NS)_Covalent>
-0.000200868113097386

> <r_psp_MMGBSA_dG_Bind(NS)_Hbond>
-0.0150522474194759

> <r_psp_MMGBSA_dG_Bind(NS)_Lipo>
-26.018116335355

> <r_psp_MMGBSA_dG_Bind(NS)_Packing>
0

> <r_psp_MMGBSA_dG_Bind(NS)_SelfCont>
0

> <r_psp_MMGBSA_dG_Bind(NS)_Solv_GB>
31.6673521794946

> <r_psp_MMGBSA_dG_Bind(NS)_vdW>
-51.7385245643

> <r_psp_Rec_Strain_Energy>
-5.0931703299284e-011

> <r_psp_Rec_Strain_Coulomb>
4.00177668780088e-011

> <r_psp_Rec_Strain_Covalent>
-9.09494701772928e-013

> <r_psp_Rec_Strain_Hbond>
-2.27373675443232e-013

> <r_psp_Rec_Strain_Lipo>
-5.00222085975111e-012

> <r_psp_Rec_Strain_Packing>
4.9737991503207e-014

> <r_psp_Rec_Strain_SelfCont>
7.105427357601e-015

> <r_psp_Rec_Strain_Solv_GB>
-1.81898940354586e-012

> <r_psp_Rec_Strain_vdW>
4.54747350886464e-012

> <r_psp_Prime_MMGBSA_ligand_efficiency>
-1.80151802279812

> <r_psp_Prime_MMGBSA_ligand_efficiency_sa>
-2.70227703419718

> <r_psp_Prime_MMGBSA_ligand_efficiency_ln>
-10.6753439635451

> <r_i_glide_lipo>
-4.69326863509998

> <r_i_glide_hbond>
0

> <r_i_glide_metal>
0

> <r_i_glide_rewards>
-2.17150044212278

> <r_i_glide_erotb>
0.670929235356062

> <r_i_glide_esite>
0

> <i_psp_ExecuteFunction_Internal_Entry_Index>
987

> <i_qp_#stars>
1

> <i_qp_#amine>
0

> <i_qp_#amidine>
0

> <i_qp_#acid>
0

> <i_qp_#amide>
0

> <i_qp_#rotor>
2

> <i_qp_#rtvFG>
0

> <i_qp_CNS>
-1

> <r_qp_mol_MW>
   335.448

> <r_qp_dipole>
     2.779

> <r_qp_SASA>
   669.978

> <r_qp_FOSA>
   408.515

> <r_qp_FISA>
    66.186

> <r_qp_PISA>
   195.277

> <r_qp_WPSA>
     0.000

> <r_qp_volume>
  1159.304

> <r_qp_donorHB>
     3.000

> <r_qp_accptHB>
     2.500

> <r_qp_dip^2/V>
   0.0066624

> <r_qp_ACxDN^.5/SA>
   0.0064631

> <r_qp_glob>
   0.7965915

> <r_qp_QPpolrz>
    40.822

> <r_qp_QPlogPC16>
    11.523

> <r_qp_QPlogPoct>
    18.837

> <r_qp_QPlogPw>
     9.525

> <r_qp_QPlogPo/w>
     4.798

> <r_qp_QPlogS>
    -6.656

> <r_qp_CIQPlogS>
    -5.546

> <r_qp_QPlogHERG>
    -5.755

> <r_qp_QPPCaco>
  2334.846

> <r_qp_QPlogBB>
    -0.252

> <r_qp_QPPMDCK>
  1237.068

> <r_qp_QPlogKp>
    -1.859

> <r_qp_IP(eV)>
     7.914

> <r_qp_EA(eV)>
     0.233

> <i_qp_#metab>
3

> <r_qp_QPlogKhsa>
     0.956

> <i_qp_HumanOralAbsorption>
1

> <r_qp_PercentHumanOralAbsorption>
   100.000

> <r_qp_SAfluorine>
     0.000

> <r_qp_SAamideO>
     0.000

> <r_qp_PSA>
    60.950

> <i_qp_#NandO>
4

> <i_qp_RuleOfFive>
0

> <i_qp_RuleOfThree>
1

> <i_qp_#ringatoms>
20

> <i_qp_#in34>
0

> <i_qp_#in56>
20

> <i_qp_#noncon>
6

> <i_qp_#nonHatm>
25

> <r_qp_Jm>
0.000883688972381228

> <s_m_subgroupid>
100str_copy1

> <s_m_subgroup_title>
100str

> <b_m_subgroup_collapsed>
0

$$$$
ind_1,591893
                    3D
 Structure written by MMmdl.
 53 56  0  0  1  0            999 V2000
   -3.3935   -1.6867    0.0946 C   0  0  0  0  0  0
   -2.3143   -0.7963    0.0722 C   0  0  0  0  0  0
   -0.9612   -1.2355   -0.0079 C   0  0  0  0  0  0
   -0.7063   -2.6175   -0.0334 C   0  0  0  0  0  0
   -1.7791   -3.5068   -0.0083 C   0  0  0  0  0  0
   -3.0921   -3.0479    0.0494 C   0  0  0  0  0  0
   -0.1403   -0.0546   -0.0355 C   0  0  0  0  0  0
   -0.9813    1.0511    0.0958 C   0  0  0  0  0  0
   -2.2775    0.5788    0.1386 N   0  0  0  0  0  0
   -0.6193    2.4449    0.2363 C   0  0  0  0  0  0
   -1.6270    3.3192    0.0405 N   0  0  0  0  0  0
    0.5385    2.7823    0.4884 O   0  0  0  0  0  0
   -1.5209    4.7773    0.1205 C   0  0  0  0  0  0
   -2.6490    5.5092   -0.6462 C   0  0  0  0  0  0
   -2.5630    7.0454   -0.5542 C   0  0  0  0  0  0
   -2.4413    7.5346    0.8981 C   0  0  0  0  0  0
   -1.2459    6.8793    1.6077 C   0  0  0  0  0  0
   -1.3026    5.3398    1.5506 C   0  0  0  0  0  0
   -4.4165   -1.3456    0.1542 H   0  0  0  0  0  0
    0.3054   -2.9934   -0.0702 H   0  0  0  0  0  0
   -1.5893   -4.5701   -0.0321 H   0  0  0  0  0  0
   -3.8986   -3.7664    0.0689 H   0  0  0  0  0  0
   -3.0682    1.1992    0.2338 H   0  0  0  0  0  0
   -2.5574    2.9531   -0.0947 H   0  0  0  0  0  0
   -0.6147    5.0448   -0.4291 H   0  0  0  0  0  0
   -2.6448    5.2118   -1.6960 H   0  0  0  0  0  0
   -3.6126    5.2038   -0.2348 H   0  0  0  0  0  0
   -1.7011    7.3932   -1.1258 H   0  0  0  0  0  0
   -3.4384    7.4947   -1.0248 H   0  0  0  0  0  0
   -2.3355    8.6200    0.9176 H   0  0  0  0  0  0
   -3.3602    7.3067    1.4405 H   0  0  0  0  0  0
   -0.3193    7.2224    1.1449 H   0  0  0  0  0  0
   -1.2048    7.2100    2.6462 H   0  0  0  0  0  0
   -2.1244    5.0102    2.1882 H   0  0  0  0  0  0
   -0.3868    4.9357    1.9839 H   0  0  0  0  0  0
    3.2764    0.5253   -0.9413 C   0  0  0  0  0  0
    1.8574    0.0895   -1.3761 C   0  0  0  0  0  0
    1.2312   -0.0303   -0.0847 O   0  0  0  0  0  0
    1.9156   -1.2318   -2.1798 C   0  0  0  0  0  0
    1.7433   -0.8649   -3.6648 C   0  0  0  0  0  0
    1.7647    0.6638   -3.7418 C   0  0  0  0  0  0
    1.2784    1.1287   -2.3684 C   0  0  0  0  0  0
    3.9469    0.6434   -1.7932 H   0  0  0  0  0  0
    3.7302   -0.2066   -0.2714 H   0  0  0  0  0  0
    3.2542    1.4761   -0.4062 H   0  0  0  0  0  0
    2.8358   -1.7899   -2.0014 H   0  0  0  0  0  0
    1.0977   -1.8928   -1.9053 H   0  0  0  0  0  0
    2.5217   -1.3084   -4.2871 H   0  0  0  0  0  0
    0.7868   -1.2397   -4.0327 H   0  0  0  0  0  0
    2.7820    1.0162   -3.9188 H   0  0  0  0  0  0
    1.1426    1.0463   -4.5517 H   0  0  0  0  0  0
    0.1892    1.1376   -2.3598 H   0  0  0  0  0  0
    1.6036    2.1477   -2.1543 H   0  0  0  0  0  0
  1  2  2  0  0  0
  1  6  1  0  0  0
  1 19  1  0  0  0
  2  3  1  0  0  0
  2  9  1  0  0  0
  3  4  2  0  0  0
  3  7  1  0  0  0
  4  5  1  0  0  0
  4 20  1  0  0  0
  5  6  2  0  0  0
  5 21  1  0  0  0
  6 22  1  0  0  0
  7  8  2  0  0  0
  7 38  1  0  0  0
  8  9  1  0  0  0
  8 10  1  0  0  0
  9 23  1  0  0  0
 10 11  1  0  0  0
 10 12  2  0  0  0
 11 13  1  0  0  0
 11 24  1  0  0  0
 13 18  1  0  0  0
 13 14  1  0  0  0
 13 25  1  0  0  0
 14 15  1  0  0  0
 14 26  1  0  0  0
 14 27  1  0  0  0
 15 16  1  0  0  0
 15 28  1  0  0  0
 15 29  1  0  0  0
 16 17  1  0  0  0
 16 30  1  0  0  0
 16 31  1  0  0  0
 17 18  1  0  0  0
 17 32  1  0  0  0
 17 33  1  0  0  0
 18 34  1  0  0  0
 18 35  1  0  0  0
 36 37  1  0  0  0
 36 43  1  0  0  0
 36 44  1  0  0  0
 36 45  1  0  0  0
 37 42  1  0  0  0
 37 38  1  0  0  0
 37 39  1  0  0  0
 39 40  1  0  0  0
 39 46  1  0  0  0
 39 47  1  0  0  0
 40 41  1  0  0  0
 40 48  1  0  0  0
 40 49  1  0  0  0
 41 42  1  0  0  0
 41 50  1  0  0  0
 41 51  1  0  0  0
 42 52  1  0  0  0
 42 53  1  0  0  0
M  END
> <s_m_entry_id>
8169

> <s_m_entry_name>
entry

> <i_f3d_flags>
0

> <s_m_job_name>
adme_1000

> <r_psp_Prime_Energy>
-34126.7769244775

> <r_psp_Prime_Solv_GB>
-5192.92229648877

> <r_psp_Prime_Coulomb>
-26489.1547324808

> <r_psp_Prime_vdW>
-4054.81833980631

> <r_psp_Prime_Covalent>
4434.55748861756

> <i_psp_model_num>
0

> <r_psp_Prime_Lipo>
-2178.06253961832

> <s_psp_Prime_Energy_Force_Field>
S-OPLS

> <s_psp_Prime_Energy_Solvent_Model>
VSGB2.1

> <r_psp_Prime_Hbond>
-550.123970713292

> <r_psp_Prime_Packing>
-55.8446424272089

> <r_psp_Prime_SelfCont>
-40.4078915603482

> <r_psp_Memb1_x>
103.457542316003

> <r_psp_Memb1_y>
39.4731108300965

> <r_psp_Memb1_z>
48.7987221124676

> <r_psp_Memb2_x>
99.8134167309003

> <r_psp_Memb2_y>
2.81176945184187

> <r_psp_Memb2_z>
23.8404289603493

> <r_psp_MembDummyRadius>
4.45

> <r_psp_Prime_Bond_Covalent>
467.37371329858

> <r_psp_Prime_Bond_SGB>
49978.7053013735

> <r_psp_Prime_Angle_Covalent>
2232.40417074727

> <r_psp_Prime_Angle_SGB>
-21663.2898290228

> <r_psp_Prime_Torsion_Covalent>
1734.77960457171

> <r_psp_Prime_NB14_LJ>
4238.99592144265

> <r_psp_Prime_NB14_Lipo>
0

> <r_psp_Prime_NB14_Elec>
25537.850737007

> <r_psp_Prime_NB14_SGB>
-15617.9045129942

> <r_psp_Prime_NBShort_LJ>
-7878.31575126538

> <r_psp_Prime_NBShort_Lipo>
-2178.06253961832

> <r_psp_Prime_NBShort_Elec>
-53043.846146255

> <r_psp_Prime_NBShort_SGB>
18021.0272311919

> <r_psp_Prime_NBLong_LJ>
-415.498509983588

> <r_psp_Prime_NBLong_Lipo>
0

> <r_psp_Prime_NBLong_Elec>
1016.84067676716

> <r_psp_Prime_NBLong_SGB>
-1167.27851985946

> <r_psp_Prime_Self_SGB>
-34744.1819671777

> <s_m_Source_Path>
F:\Dekstop_files\DAC4,5\Molecular Systems Desgn and Engineering\supplementary_str

> <s_m_Source_File>
1000_str.mae

> <i_m_Source_File_Index>
915

> <i_lp_mmshare_version>
53156

> <s_epik_input>
W0NIMl0xW0NIMl1bQ0gyXVtDSDJdQzEoW0NIM10pT2MoYyhjMjMpW2NIXVtjSF1bY0hdW2NIXTIpYyhbbkhdMylDKD1PKVtOSF1bQ0hdNFtDSDJdW0NIMl1bQ0gyXVtDSDJdW0NIMl00

> <s_epik_cmdline>
J2VwaWtfcHl0aG9uJywgJy1waHQnLCAnMC4wJywgJy1waCcsICc3LjAnLCAnLXRuJywgJzgnLCAnLW1hJywgJzUwMCcsICctaW1hZScsICc8aW5maWxlLm1hZT4nLCAnLW9tYWUnLCAnPG91dGZpbGUubWFlPic=

> <r_lp_tautomer_probability>
1

> <r_epik_Ionization_Penalty>
  0.0000

> <r_epik_Ionization_Penalty_Charging>
  0.0000

> <r_epik_Ionization_Penalty_Neutral>
  0.0000

> <r_epik_State_Penalty>
  0.0000

> <r_epik_Charging_Adjusted_Penalty>
0

> <i_epik_Tot_Q>
0

> <i_epik_Tot_abs_Q>
0

> <s_lp_Force_Field>
S-OPLS

> <r_lp_Energy>
46.573255

> <b_lp_Chiralities_Consistent>
1

> <s_lp_Variant>
ind_1,591893-1

> <s_i_glide_gridfile>
glide-grid_mmpl3

> <i_i_glide_lignum>
1155

> <i_i_glide_rotatable_bonds>
5

> <r_i_docking_score>
-8.449920400484

> <r_i_glide_ligand_efficiency>
-0.33799681601936

> <r_i_glide_ligand_efficiency_sa>
-0.988308684439665

> <r_i_glide_ligand_efficiency_ln>
-2.00288435859521

> <r_i_glide_gscore>
-8.449920400484

> <r_i_glide_evdw>
-43.0217933654785

> <r_i_glide_ecoul>
-0.798575699329376

> <r_i_glide_energy>
-43.8203690648079

> <r_i_glide_einternal>
6.98864889144897

> <r_i_glide_emodel>
-63.0477629560509

> <i_i_glide_confnum>
365

> <i_i_glide_posenum>
131

> <r_i_glide_eff_state_penalty>
0

> <i_rge_num_r_groups>
1

> <r_rge_occupation_R1>
1

> <s_rge_R1>
591893

> <s_rge_R1_s_m_title>
591893

> <s_rge_R1_s_m_entry_id>
16918

> <s_rge_R1_s_m_entry_name>
eMol_BB_r-groups.496

> <s_rge_R1_s_m_smiles>
[*]OC1(C)CCCC1

> <b_rge_R1_b_sd_chiral_flag>
0

> <i_rge_R1_i_sd_version>
0

> <s_rge_R1_s_m_Source_File>
eMol_BB_r-groups-dedup.mae

> <i_rge_R1_i_m_Source_File_Index>
382

> <s_rge_R1_s_m_Source_Path>
/Users/konze/projects/pathfinder/r-groups

> <s_rge_R1_s_sd_Source_Path>
/Users/konze/projects/pathfinder/reactant sets/eMolecules

> <s_rge_R1_s_sd_Source_File>
eMol BB r-groups.mae

> <i_rge_R1_i_sd_Source_File_Index>
496

> <r_rge_R1_r_sd_MW>
100.1589

> <i_rge_R1_i_sd_RB>
0

> <i_rge_R1_i_sd_HeavyAtomCount>
7

> <i_rge_R1_i_sd_HBA>
1

> <i_rge_R1_i_sd_HBD>
1

> <r_rge_R1_r_sd_PSA>
20.23

> <i_rge_R1_i_sd_ChiralCenterCount>
0

> <i_rge_R1_i_sd_ChiralCenterCountAllPossible>
0

> <i_rge_R1_i_sd_RingCount>
1

> <r_rge_R1_r_sd_AlogP>
1.2491

> <s_rge_R1_s_sd_subgroup_title>
eMol BB r-groups

> <s_rge_R1_s_sd_subgroupid>
eMol BB r-groups

> <i_rge_R1_i_sd_subgroup_collapsed>
0

> <s_rge_R1_s_sd_Unique_SMILES_Stereo>
CC1(O)CCCC1

> <i_rge_R1_i_sd_canvasUID>
440

> <s_rge_R1_s_canvas_Unique_SMILES_Stereo>
CC1(O)CCCC1

> <s_psp_Prime_MMGBSA_Input_Structure_Hash>
ee17f900095149de4b1843371579fd8f08bd8ae723930dbfc1b29fa5

> <i_psp_number_heavy_atoms>
25

> <r_psp_MMGBSA_dG_Bind>
-45.3027755134026

> <r_psp_MMGBSA_dG_Bind_Coulomb>
-5.1108651359973

> <r_psp_MMGBSA_dG_Bind_Covalent>
5.71451393105963

> <r_psp_MMGBSA_dG_Bind_Hbond>
-0.0263656301107176

> <r_psp_MMGBSA_dG_Bind_Lipo>
-25.3360224098919

> <r_psp_MMGBSA_dG_Bind_Packing>
4.9737991503207e-014

> <r_psp_MMGBSA_dG_Bind_SelfCont>
7.105427357601e-015

> <r_psp_MMGBSA_dG_Bind_Solv_GB>
22.830531904473

> <r_psp_MMGBSA_dG_Bind_vdW>
-43.3745681728383

> <r_psp_Lig_Strain_Energy>
8.08887953306382

> <r_psp_Lig_Strain_Coulomb>
0.864590541065539

> <r_psp_Lig_Strain_Covalent>
5.71471479917473

> <r_psp_Lig_Strain_Hbond>
0

> <r_psp_Lig_Strain_Lipo>
-0.0654309601469372

> <r_psp_Lig_Strain_Packing>
0

> <r_psp_Lig_Strain_SelfCont>
0

> <r_psp_Lig_Strain_Solv_GB>
-1.34200811851544

> <r_psp_Lig_Strain_vdW>
2.91701327148597

> <r_psp_Ligand_Energy>
13.7768917697086

> <r_psp_Ligand_Coulomb>
-25.1280534018038

> <r_psp_Ligand_Covalent>
38.4364488650923

> <r_psp_Ligand_Hbond>
0

> <r_psp_Ligand_Lipo>
-2.20188487094513

> <r_psp_Ligand_Packing>
0

> <r_psp_Ligand_SelfCont>
0

> <r_psp_Ligand_Solv_GB>
-9.20104803065392

> <r_psp_Ligand_vdW>
11.8714292080191

> <r_psp_Complex_Energy>
-34126.7769244775

> <r_psp_Complex_Coulomb>
-26489.1547324808

> <r_psp_Complex_Covalent>
4434.55748861756

> <r_psp_Complex_Hbond>
-550.123970713292

> <r_psp_Complex_Lipo>
-2178.06253961832

> <r_psp_Complex_Packing>
-55.8446424272089

> <r_psp_Complex_SelfCont>
-40.4078915603482

> <r_psp_Complex_Solv_GB>
-5192.92229648877

> <r_psp_Complex_vdW>
-4054.81833980631

> <r_psp_Receptor_Energy>
-34095.2510407338

> <r_psp_Receptor_Coulomb>
-26458.915813943

> <r_psp_Receptor_Covalent>
4390.40652582141

> <r_psp_Receptor_Hbond>
-550.097605083181

> <r_psp_Receptor_Lipo>
-2150.52463233748

> <r_psp_Receptor_Packing>
-55.8446424272089

> <r_psp_Receptor_SelfCont>
-40.4078915603482

> <r_psp_Receptor_Solv_GB>
-5206.55178036259

> <r_psp_Receptor_vdW>
-4023.31520084149

> <r_psp_MMGBSA_dG_Bind(NS)>
-53.3916550464128

> <r_psp_MMGBSA_dG_Bind(NS)_Coulomb>
-5.97545567710404

> <r_psp_MMGBSA_dG_Bind(NS)_Covalent>
-0.00020086811400688

> <r_psp_MMGBSA_dG_Bind(NS)_Hbond>
-0.0263656301104902

> <r_psp_MMGBSA_dG_Bind(NS)_Lipo>
-25.2705914497396

> <r_psp_MMGBSA_dG_Bind(NS)_Packing>
0

> <r_psp_MMGBSA_dG_Bind(NS)_SelfCont>
0

> <r_psp_MMGBSA_dG_Bind(NS)_Solv_GB>
24.1725400229907

> <r_psp_MMGBSA_dG_Bind(NS)_vdW>
-46.291581444329

> <r_psp_Rec_Strain_Energy>
-5.0931703299284e-011

> <r_psp_Rec_Strain_Coulomb>
4.00177668780088e-011

> <r_psp_Rec_Strain_Covalent>
-9.09494701772928e-013

> <r_psp_Rec_Strain_Hbond>
-2.27373675443232e-013

> <r_psp_Rec_Strain_Lipo>
-5.00222085975111e-012

> <r_psp_Rec_Strain_Packing>
4.9737991503207e-014

> <r_psp_Rec_Strain_SelfCont>
7.105427357601e-015

> <r_psp_Rec_Strain_Solv_GB>
-1.81898940354586e-012

> <r_psp_Rec_Strain_vdW>
4.54747350886464e-012

> <r_psp_Prime_MMGBSA_ligand_efficiency>
-1.8121110205361

> <r_psp_Prime_MMGBSA_ligand_efficiency_sa>
-2.71816653080416

> <r_psp_Prime_MMGBSA_ligand_efficiency_ln>
-10.7381154113058

> <r_i_glide_lipo>
-4.94698401325197

> <r_i_glide_hbond>
0

> <r_i_glide_metal>
0

> <r_i_glide_rewards>
-2.0489535689185

> <r_i_glide_erotb>
0.816893204859796

> <r_i_glide_esite>
0

> <i_psp_ExecuteFunction_Internal_Entry_Index>
1157

> <i_qp_#stars>
1

> <i_qp_#amine>
0

> <i_qp_#amidine>
0

> <i_qp_#acid>
0

> <i_qp_#amide>
0

> <i_qp_#rotor>
4

> <i_qp_#rtvFG>
0

> <i_qp_CNS>
0

> <r_qp_mol_MW>
   340.464

> <r_qp_dipole>
     6.873

> <r_qp_SASA>
   646.206

> <r_qp_FOSA>
   437.420

> <r_qp_FISA>
    39.591

> <r_qp_PISA>
   169.196

> <r_qp_WPSA>
     0.000

> <r_qp_volume>
  1152.018

> <r_qp_donorHB>
     2.000

> <r_qp_accptHB>
     3.250

> <r_qp_dip^2/V>
   0.0410077

> <r_qp_ACxDN^.5/SA>
   0.0071126

> <r_qp_glob>
   0.8224321

> <r_qp_QPpolrz>
    38.997

> <r_qp_QPlogPC16>
    10.840

> <r_qp_QPlogPoct>
    17.481

> <r_qp_QPlogPw>
     7.943

> <r_qp_QPlogPo/w>
     4.868

> <r_qp_QPlogS>
    -6.018

> <r_qp_CIQPlogS>
    -5.201

> <r_qp_QPlogHERG>
    -5.212

> <r_qp_QPPCaco>
  4173.130

> <r_qp_QPlogBB>
    -0.068

> <r_qp_QPPMDCK>
  2317.373

> <r_qp_QPlogKp>
    -1.269

> <r_qp_IP(eV)>
     8.370

> <r_qp_EA(eV)>
     0.447

> <i_qp_#metab>
0

> <r_qp_QPlogKhsa>
     0.862

> <i_qp_HumanOralAbsorption>
3

> <r_qp_PercentHumanOralAbsorption>
   100.000

> <r_qp_SAfluorine>
     0.000

> <r_qp_SAamideO>
     0.000

> <r_qp_PSA>
    54.141

> <i_qp_#NandO>
4

> <i_qp_RuleOfFive>
0

> <i_qp_RuleOfThree>
1

> <i_qp_#ringatoms>
20

> <i_qp_#in34>
0

> <i_qp_#in56>
20

> <i_qp_#noncon>
11

> <i_qp_#nonHatm>
25

> <r_qp_Jm>
0.0175914393273647

> <s_m_subgroupid>
100str_copy1

> <s_m_subgroup_title>
100str

> <b_m_subgroup_collapsed>
0

$$$$
ind_1,721016
                    3D
 Structure written by MMmdl.
 48 51  0  0  1  0            999 V2000
   -3.4573   -1.6826    0.2077 C   0  0  0  0  0  0
   -2.3589   -0.8165    0.1698 C   0  0  0  0  0  0
   -1.0125   -1.2807    0.1154 C   0  0  0  0  0  0
   -0.7948   -2.6714    0.0699 C   0  0  0  0  0  0
   -1.8858   -3.5372    0.1053 C   0  0  0  0  0  0
   -3.1870   -3.0499    0.1762 C   0  0  0  0  0  0
   -0.1604   -0.1103    0.1093 C   0  0  0  0  0  0
   -0.9981    1.0104    0.1010 C   0  0  0  0  0  0
   -2.3001    0.5569    0.1639 N   0  0  0  0  0  0
   -0.6363    2.4173    0.0738 C   0  0  0  0  0  0
   -1.6734    3.2781    0.0085 N   0  0  0  0  0  0
    0.5422    2.7769    0.0937 O   0  0  0  0  0  0
   -1.5752    4.7390   -0.0124 C   0  0  0  0  0  0
   -2.8496    5.4214   -0.5668 C   0  0  0  0  0  0
   -2.7807    6.9615   -0.5667 C   0  0  0  0  0  0
   -2.3710    7.5264    0.8029 C   0  0  0  0  0  0
   -1.0410    6.9201    1.2777 C   0  0  0  0  0  0
   -1.0792    5.3797    1.3117 C   0  0  0  0  0  0
   -4.4729   -1.3176    0.2523 H   0  0  0  0  0  0
    0.2040   -3.0755    0.0046 H   0  0  0  0  0  0
   -1.7193   -4.6041    0.0755 H   0  0  0  0  0  0
   -4.0094   -3.7498    0.2001 H   0  0  0  0  0  0
   -3.0845    1.1917    0.1883 H   0  0  0  0  0  0
   -2.6083    2.9043    0.0741 H   0  0  0  0  0  0
   -0.8049    4.9804   -0.7497 H   0  0  0  0  0  0
   -3.0546    5.0716   -1.5798 H   0  0  0  0  0  0
   -3.7022    5.1280    0.0481 H   0  0  0  0  0  0
   -2.0653    7.2912   -1.3218 H   0  0  0  0  0  0
   -3.7455    7.3747   -0.8641 H   0  0  0  0  0  0
   -2.2859    8.6124    0.7474 H   0  0  0  0  0  0
   -3.1522    7.3174    1.5355 H   0  0  0  0  0  0
   -0.2388    7.2453    0.6133 H   0  0  0  0  0  0
   -0.7894    7.3056    2.2665 H   0  0  0  0  0  0
   -1.7478    5.0787    2.1198 H   0  0  0  0  0  0
   -0.0869    5.0071    1.5692 H   0  0  0  0  0  0
    4.1249   -0.6076   -0.5995 C   0  0  0  0  0  0
    3.3503   -1.1985    0.4850 N   0  0  0  0  0  0
    3.9427   -2.1148    1.2674 N   0  0  0  0  0  0
    3.0100   -2.4910    2.1091 C   0  0  0  0  0  0
    1.7956   -1.8445    1.8728 C   0  0  0  0  0  0
    2.0170   -1.0122    0.7842 C   0  0  0  0  0  0
    1.2186   -0.1398    0.0812 N   0  0  0  0  0  0
    3.7849    0.4114   -0.7861 H   0  0  0  0  0  0
    3.9896   -1.2047   -1.5017 H   0  0  0  0  0  0
    5.1848   -0.5784   -0.3402 H   0  0  0  0  0  0
    3.2018   -3.2226    2.8802 H   0  0  0  0  0  0
    0.8729   -1.9733    2.4189 H   0  0  0  0  0  0
    1.6834    0.6351   -0.3705 H   0  0  0  0  0  0
  1  2  2  0  0  0
  1  6  1  0  0  0
  1 19  1  0  0  0
  2  3  1  0  0  0
  2  9  1  0  0  0
  3  4  2  0  0  0
  3  7  1  0  0  0
  4  5  1  0  0  0
  4 20  1  0  0  0
  5  6  2  0  0  0
  5 21  1  0  0  0
  6 22  1  0  0  0
  7  8  2  0  0  0
  7 42  1  0  0  0
  8  9  1  0  0  0
  8 10  1  0  0  0
  9 23  1  0  0  0
 10 11  1  0  0  0
 10 12  2  0  0  0
 11 13  1  0  0  0
 11 24  1  0  0  0
 13 18  1  0  0  0
 13 14  1  0  0  0
 13 25  1  0  0  0
 14 15  1  0  0  0
 14 26  1  0  0  0
 14 27  1  0  0  0
 15 16  1  0  0  0
 15 28  1  0  0  0
 15 29  1  0  0  0
 16 17  1  0  0  0
 16 30  1  0  0  0
 16 31  1  0  0  0
 17 18  1  0  0  0
 17 32  1  0  0  0
 17 33  1  0  0  0
 18 34  1  0  0  0
 18 35  1  0  0  0
 36 37  1  0  0  0
 36 43  1  0  0  0
 36 44  1  0  0  0
 36 45  1  0  0  0
 37 41  1  0  0  0
 37 38  1  0  0  0
 38 39  2  0  0  0
 39 40  1  0  0  0
 39 46  1  0  0  0
 40 41  2  0  0  0
 40 47  1  0  0  0
 41 42  1  0  0  0
 42 48  1  0  0  0
M  END
> <s_m_entry_id>
8136

> <s_m_entry_name>
entry

> <i_f3d_flags>
0

> <s_m_job_name>
adme_1000

> <r_psp_Prime_Energy>
-34122.8545904147

> <r_psp_Prime_Solv_GB>
-5190.73313171856

> <r_psp_Prime_Coulomb>
-26475.3825991981

> <r_psp_Prime_vdW>
-4056.24915391663

> <r_psp_Prime_Covalent>
4420.52980242317

> <i_psp_model_num>
0

> <r_psp_Prime_Lipo>
-2174.54019169328

> <s_psp_Prime_Energy_Force_Field>
S-OPLS

> <s_psp_Prime_Energy_Solvent_Model>
VSGB2.1

> <r_psp_Prime_Hbond>
-550.226782323679

> <r_psp_Prime_Packing>
-55.8446424272089

> <r_psp_Prime_SelfCont>
-40.4078915603482

> <r_psp_Memb1_x>
103.457542316003

> <r_psp_Memb1_y>
39.4731108300965

> <r_psp_Memb1_z>
48.7987221124676

> <r_psp_Memb2_x>
99.8134167309003

> <r_psp_Memb2_y>
2.81176945184187

> <r_psp_Memb2_z>
23.8404289603493

> <r_psp_MembDummyRadius>
4.45

> <r_psp_Prime_Bond_Covalent>
467.116984082412

> <r_psp_Prime_Bond_SGB>
49969.3580641132

> <r_psp_Prime_Angle_Covalent>
2224.14037367266

> <r_psp_Prime_Angle_SGB>
-21651.3607427172

> <r_psp_Prime_Torsion_Covalent>
1729.27244466811

> <r_psp_Prime_NB14_LJ>
4238.91788434918

> <r_psp_Prime_NB14_Lipo>
0

> <r_psp_Prime_NB14_Elec>
25571.5438937595

> <r_psp_Prime_NB14_SGB>
-15624.0793354942

> <r_psp_Prime_NBShort_LJ>
-7880.44904668099

> <r_psp_Prime_NBShort_Lipo>
-2174.54019169328

> <r_psp_Prime_NBShort_Elec>
-53066.7062168028

> <r_psp_Prime_NBShort_SGB>
18022.9160607216

> <r_psp_Prime_NBLong_LJ>
-414.717991584823

> <r_psp_Prime_NBLong_Lipo>
0

> <r_psp_Prime_NBLong_Elec>
1019.77972384525

> <r_psp_Prime_NBLong_SGB>
-1166.31034944327

> <r_psp_Prime_Self_SGB>
-34741.2568288987

> <s_m_Source_Path>
F:\Dekstop_files\DAC4,5\Molecular Systems Desgn and Engineering\supplementary_str

> <s_m_Source_File>
1000_str.mae

> <i_m_Source_File_Index>
829

> <i_lp_mmshare_version>
53156

> <s_epik_input>
W0NIM11uMW5bY0hdW2NIXWMxW05IXWMoYyhjMjMpW2NIXVtjSF1bY0hdW2NIXTIpYyhbbkhdMylDKD1PKVtOSF1bQ0hdNFtDSDJdW0NIMl1bQ0gyXVtDSDJdW0NIMl00

> <s_epik_cmdline>
J2VwaWtfcHl0aG9uJywgJy1waHQnLCAnMC4wJywgJy1waCcsICc3LjAnLCAnLXRuJywgJzgnLCAnLW1hJywgJzUwMCcsICctaW1hZScsICc8aW5maWxlLm1hZT4nLCAnLW9tYWUnLCAnPG91dGZpbGUubWFlPic=

> <r_lp_tautomer_probability>
1

> <r_epik_Ionization_Penalty>
  0.0002

> <r_epik_Ionization_Penalty_Charging>
  0.0000

> <r_epik_Ionization_Penalty_Neutral>
  0.0002

> <r_epik_State_Penalty>
  0.0000

> <r_epik_Charging_Adjusted_Penalty>
0

> <i_epik_Tot_Q>
0

> <i_epik_Tot_abs_Q>
0

> <s_lp_Force_Field>
S-OPLS

> <r_lp_Energy>
38.240159

> <b_lp_Chiralities_Consistent>
1

> <s_lp_Variant>
ind_1,721016-1

> <s_i_glide_gridfile>
glide-grid_mmpl3

> <i_i_glide_lignum>
1191

> <i_i_glide_rotatable_bonds>
5

> <r_i_docking_score>
-8.1530908052194

> <r_i_glide_ligand_efficiency>
-0.326123632208776

> <r_i_glide_ligand_efficiency_sa>
-0.953591284405705

> <r_i_glide_ligand_efficiency_ln>
-1.93252684925234

> <r_i_glide_gscore>
-8.1530908052194

> <r_i_glide_evdw>
-42.127025604248

> <r_i_glide_ecoul>
-0.812915086746216

> <r_i_glide_energy>
-42.9399406909943

> <r_i_glide_einternal>
5.70619869232178

> <r_i_glide_emodel>
-58.0705193590072

> <i_i_glide_confnum>
64

> <i_i_glide_posenum>
274

> <r_i_glide_eff_state_penalty>
0

> <i_rge_num_r_groups>
1

> <r_rge_occupation_R1>
1

> <s_rge_R1>
721016

> <s_rge_R1_s_m_title>
721016

> <s_rge_R1_s_m_entry_id>
16957

> <s_rge_R1_s_m_entry_name>
eMol_BB_r-groups.513

> <s_rge_R1_s_m_smiles>
[*]Nc1ccnn1C

> <b_rge_R1_b_sd_chiral_flag>
0

> <i_rge_R1_i_sd_version>
0

> <s_rge_R1_s_m_Source_File>
eMol_BB_r-groups-dedup.mae

> <i_rge_R1_i_m_Source_File_Index>
397

> <s_rge_R1_s_m_Source_Path>
/Users/konze/projects/pathfinder/r-groups

> <s_rge_R1_s_sd_Source_Path>
/Users/konze/projects/pathfinder/reactant sets/eMolecules

> <s_rge_R1_s_sd_Source_File>
eMol BB r-groups.mae

> <i_rge_R1_i_sd_Source_File_Index>
513

> <r_rge_R1_r_sd_MW>
97.1185

> <i_rge_R1_i_sd_RB>
0

> <i_rge_R1_i_sd_HeavyAtomCount>
7

> <i_rge_R1_i_sd_HBA>
1

> <i_rge_R1_i_sd_HBD>
1

> <r_rge_R1_r_sd_PSA>
43.84

> <i_rge_R1_i_sd_ChiralCenterCount>
0

> <i_rge_R1_i_sd_ChiralCenterCountAllPossible>
0

> <i_rge_R1_i_sd_RingCount>
1

> <r_rge_R1_r_sd_AlogP>
-0.1955

> <s_rge_R1_s_sd_subgroup_title>
eMol BB r-groups

> <s_rge_R1_s_sd_subgroupid>
eMol BB r-groups

> <i_rge_R1_i_sd_subgroup_collapsed>
0

> <s_rge_R1_s_sd_Unique_SMILES_Stereo>
Cn1nccc1N

> <i_rge_R1_i_sd_canvasUID>
457

> <s_rge_R1_s_canvas_Unique_SMILES_Stereo>
Cn1nccc1N

> <s_psp_Prime_MMGBSA_Input_Structure_Hash>
154e19eef22482eae4f7778d6a9956478e5f7fc18df6f18650268d71

> <i_psp_number_heavy_atoms>
25

> <r_psp_MMGBSA_dG_Bind>
-44.1197168289873

> <r_psp_MMGBSA_dG_Bind_Coulomb>
-4.79874935967018

> <r_psp_MMGBSA_dG_Bind_Covalent>
2.83766711884709

> <r_psp_MMGBSA_dG_Bind_Hbond>
-0.129177240497938

> <r_psp_MMGBSA_dG_Bind_Lipo>
-22.5422083424746

> <r_psp_MMGBSA_dG_Bind_Packing>
4.9737991503207e-014

> <r_psp_MMGBSA_dG_Bind_SelfCont>
7.105427357601e-015

> <r_psp_MMGBSA_dG_Bind_Solv_GB>
26.0009396793157

> <r_psp_MMGBSA_dG_Bind_vdW>
-45.4881886844246

> <r_psp_Lig_Strain_Energy>
5.07577571973846

> <r_psp_Lig_Strain_Coulomb>
-1.25284159843895

> <r_psp_Lig_Strain_Covalent>
2.83786798696019

> <r_psp_Lig_Strain_Hbond>
0

> <r_psp_Lig_Strain_Lipo>
-0.031599765165407

> <r_psp_Lig_Strain_Packing>
0

> <r_psp_Lig_Strain_SelfCont>
0

> <r_psp_Lig_Strain_Solv_GB>
0.305081481605725

> <r_psp_Lig_Strain_vdW>
3.21726761477691

> <r_psp_Ligand_Energy>
16.5161671481277

> <r_psp_Ligand_Coulomb>
-11.6680358954624

> <r_psp_Ligand_Covalent>
27.2856094829177

> <r_psp_Ligand_Hbond>
0

> <r_psp_Ligand_Lipo>
-1.47335101332518

> <r_psp_Ligand_Packing>
0

> <r_psp_Ligand_SelfCont>
0

> <r_psp_Ligand_Solv_GB>
-10.1822910352823

> <r_psp_Ligand_vdW>
12.5542356092799

> <r_psp_Complex_Energy>
-34122.8545904147

> <r_psp_Complex_Coulomb>
-26475.3825991981

> <r_psp_Complex_Covalent>
4420.52980242317

> <r_psp_Complex_Hbond>
-550.226782323679

> <r_psp_Complex_Lipo>
-2174.54019169328

> <r_psp_Complex_Packing>
-55.8446424272089

> <r_psp_Complex_SelfCont>
-40.4078915603482

> <r_psp_Complex_Solv_GB>
-5190.73313171856

> <r_psp_Complex_vdW>
-4056.24915391663

> <r_psp_Receptor_Energy>
-34095.2510407338

> <r_psp_Receptor_Coulomb>
-26458.915813943

> <r_psp_Receptor_Covalent>
4390.40652582141

> <r_psp_Receptor_Hbond>
-550.097605083181

> <r_psp_Receptor_Lipo>
-2150.52463233748

> <r_psp_Receptor_Packing>
-55.8446424272089

> <r_psp_Receptor_SelfCont>
-40.4078915603482

> <r_psp_Receptor_Solv_GB>
-5206.55178036259

> <r_psp_Receptor_vdW>
-4023.31520084149

> <r_psp_MMGBSA_dG_Bind(NS)>
-49.1954925486789

> <r_psp_MMGBSA_dG_Bind(NS)_Coulomb>
-3.54590776127225

> <r_psp_MMGBSA_dG_Bind(NS)_Covalent>
-0.000200868112187891

> <r_psp_MMGBSA_dG_Bind(NS)_Hbond>
-0.129177240497711

> <r_psp_MMGBSA_dG_Bind(NS)_Lipo>
-22.5106085773041

> <r_psp_MMGBSA_dG_Bind(NS)_Packing>
0

> <r_psp_MMGBSA_dG_Bind(NS)_SelfCont>
0

> <r_psp_MMGBSA_dG_Bind(NS)_Solv_GB>
25.6958581977124

> <r_psp_MMGBSA_dG_Bind(NS)_vdW>
-48.7054562992062

> <r_psp_Rec_Strain_Energy>
-5.0931703299284e-011

> <r_psp_Rec_Strain_Coulomb>
4.00177668780088e-011

> <r_psp_Rec_Strain_Covalent>
-9.09494701772928e-013

> <r_psp_Rec_Strain_Hbond>
-2.27373675443232e-013

> <r_psp_Rec_Strain_Lipo>
-5.00222085975111e-012

> <r_psp_Rec_Strain_Packing>
4.9737991503207e-014

> <r_psp_Rec_Strain_SelfCont>
7.105427357601e-015

> <r_psp_Rec_Strain_Solv_GB>
-1.81898940354586e-012

> <r_psp_Rec_Strain_vdW>
4.54747350886464e-012

> <r_psp_Prime_MMGBSA_ligand_efficiency>
-1.76478867315949

> <r_psp_Prime_MMGBSA_ligand_efficiency_sa>
-2.64718300973924

> <r_psp_Prime_MMGBSA_ligand_efficiency_ln>
-10.4576950496915

> <r_i_glide_lipo>
-4.4703489195824

> <r_i_glide_hbond>
0

> <r_i_glide_metal>
0

> <r_i_glide_rewards>
-2.28443658058028

> <r_i_glide_erotb>
0.829983238167626

> <r_i_glide_esite>
0

> <i_psp_ExecuteFunction_Internal_Entry_Index>
1662

> <i_qp_#stars>
1

> <i_qp_#amine>
0

> <i_qp_#amidine>
0

> <i_qp_#acid>
0

> <i_qp_#amide>
0

> <i_qp_#rotor>
4

> <i_qp_#rtvFG>
0

> <i_qp_CNS>
0

> <r_qp_mol_MW>
   337.424

> <r_qp_dipole>
     8.473

> <r_qp_SASA>
   656.377

> <r_qp_FOSA>
   323.285

> <r_qp_FISA>
    86.636

> <r_qp_PISA>
   246.456

> <r_qp_WPSA>
     0.000

> <r_qp_volume>
  1132.867

> <r_qp_donorHB>
     2.000

> <r_qp_accptHB>
     3.000

> <r_qp_dip^2/V>
   0.0633645

> <r_qp_ACxDN^.5/SA>
   0.0064637

> <r_qp_glob>
   0.8006898

> <r_qp_QPpolrz>
    38.969

> <r_qp_QPlogPC16>
    11.538

> <r_qp_QPlogPoct>
    17.909

> <r_qp_QPlogPw>
     8.566

> <r_qp_QPlogPo/w>
     4.601

> <r_qp_QPlogS>
    -6.276

> <r_qp_CIQPlogS>
    -5.554

> <r_qp_QPlogHERG>
    -5.932

> <r_qp_QPPCaco>
  1493.922

> <r_qp_QPlogBB>
    -0.579

> <r_qp_QPPMDCK>
   763.445

> <r_qp_QPlogKp>
    -1.864

> <r_qp_IP(eV)>
     7.672

> <r_qp_EA(eV)>
     0.567

> <i_qp_#metab>
1

> <r_qp_QPlogKhsa>
     0.845

> <i_qp_HumanOralAbsorption>
1

> <r_qp_PercentHumanOralAbsorption>
   100.000

> <r_qp_SAfluorine>
     0.000

> <r_qp_SAamideO>
     0.000

> <r_qp_PSA>
    76.981

> <i_qp_#NandO>
6

> <i_qp_RuleOfFive>
0

> <i_qp_RuleOfThree>
1

> <i_qp_#ringatoms>
20

> <i_qp_#in34>
0

> <i_qp_#in56>
20

> <i_qp_#noncon>
6

> <i_qp_#nonHatm>
25

> <r_qp_Jm>
0.00244198345401478

> <s_m_subgroupid>
100str_copy1

> <s_m_subgroup_title>
100str

> <b_m_subgroup_collapsed>
0

$$$$
ind_1,818218
                    3D
 Structure written by MMmdl.
 49 52  0  0  1  0            999 V2000
   -3.2629    1.6465   -0.0521 C   0  0  0  0  0  0
   -2.2043    0.7316   -0.0586 C   0  0  0  0  0  0
   -0.8422    1.1330    0.0213 C   0  0  0  0  0  0
   -0.5558    2.5064    0.1128 C   0  0  0  0  0  0
   -1.6065    3.4221    0.1226 C   0  0  0  0  0  0
   -2.9299    2.9978    0.0414 C   0  0  0  0  0  0
   -0.0288   -0.0560   -0.0140 C   0  0  0  0  0  0
   -0.9117   -1.1438   -0.0898 C   0  0  0  0  0  0
   -2.1965   -0.6396   -0.1341 N   0  0  0  0  0  0
   -0.6136   -2.5646   -0.1495 C   0  0  0  0  0  0
   -1.6837   -3.3808   -0.0506 N   0  0  0  0  0  0
    0.5399   -2.9800   -0.2617 O   0  0  0  0  0  0
   -1.6537   -4.8448   -0.0827 C   0  0  0  0  0  0
   -2.9283   -5.4867    0.5174 C   0  0  0  0  0  0
   -2.9268   -7.0276    0.4739 C   0  0  0  0  0  0
   -2.6133   -7.5692   -0.9301 C   0  0  0  0  0  0
   -1.2837   -7.0072   -1.4578 C   0  0  0  0  0  0
   -1.2561   -5.4659   -1.4490 C   0  0  0  0  0  0
   -4.2939    1.3301   -0.1132 H   0  0  0  0  0  0
    0.4647    2.8541    0.1769 H   0  0  0  0  0  0
   -1.3910    4.4782    0.1947 H   0  0  0  0  0  0
   -3.7195    3.7350    0.0521 H   0  0  0  0  0  0
   -3.0028   -1.2428   -0.2033 H   0  0  0  0  0  0
   -2.6019   -2.9631   -0.0329 H   0  0  0  0  0  0
   -0.8579   -5.1428    0.6050 H   0  0  0  0  0  0
   -3.0679   -5.1559    1.5477 H   0  0  0  0  0  0
   -3.7957   -5.1398   -0.0466 H   0  0  0  0  0  0
   -2.1877   -7.4077    1.1810 H   0  0  0  0  0  0
   -3.8915   -7.4086    0.8112 H   0  0  0  0  0  0
   -2.5742   -8.6588   -0.9080 H   0  0  0  0  0  0
   -3.4211   -7.3056   -1.6148 H   0  0  0  0  0  0
   -0.4639   -7.3855   -0.8448 H   0  0  0  0  0  0
   -1.0998   -7.3759   -2.4676 H   0  0  0  0  0  0
   -1.9523   -5.1131   -2.2116 H   0  0  0  0  0  0
   -0.2634   -5.1285   -1.7495 H   0  0  0  0  0  0
    2.4681   -1.4386    4.5919 C   0  0  0  0  0  0
    2.4092   -0.5155    3.3978 C   0  0  0  0  0  0
    2.8389    0.8150    3.2884 C   0  0  0  0  0  0
    2.5551    1.1976    1.9919 C   0  0  0  0  0  0
    1.9755    0.0977    1.4171 N   0  0  0  0  0  0
    1.8979   -0.9418    2.2622 N   0  0  0  0  0  0
    1.4920   -0.0454    0.0505 C   0  0  0  0  0  0
    2.9138   -0.9531    5.4604 H   0  0  0  0  0  0
    3.0618   -2.3294    4.3845 H   0  0  0  0  0  0
    1.4746   -1.7756    4.8897 H   0  0  0  0  0  0
    3.2980    1.4165    4.0589 H   0  0  0  0  0  0
    2.7006    2.1168    1.4436 H   0  0  0  0  0  0
    1.9460   -0.9419   -0.3703 H   0  0  0  0  0  0
    1.9008    0.7735   -0.5429 H   0  0  0  0  0  0
  1  2  2  0  0  0
  1  6  1  0  0  0
  1 19  1  0  0  0
  2  3  1  0  0  0
  2  9  1  0  0  0
  3  4  2  0  0  0
  3  7  1  0  0  0
  4  5  1  0  0  0
  4 20  1  0  0  0
  5  6  2  0  0  0
  5 21  1  0  0  0
  6 22  1  0  0  0
  7  8  2  0  0  0
  7 42  1  0  0  0
  8  9  1  0  0  0
  8 10  1  0  0  0
  9 23  1  0  0  0
 10 11  1  0  0  0
 10 12  2  0  0  0
 11 13  1  0  0  0
 11 24  1  0  0  0
 13 18  1  0  0  0
 13 14  1  0  0  0
 13 25  1  0  0  0
 14 15  1  0  0  0
 14 26  1  0  0  0
 14 27  1  0  0  0
 15 16  1  0  0  0
 15 28  1  0  0  0
 15 29  1  0  0  0
 16 17  1  0  0  0
 16 30  1  0  0  0
 16 31  1  0  0  0
 17 18  1  0  0  0
 17 32  1  0  0  0
 17 33  1  0  0  0
 18 34  1  0  0  0
 18 35  1  0  0  0
 36 37  1  0  0  0
 36 43  1  0  0  0
 36 44  1  0  0  0
 36 45  1  0  0  0
 37 41  2  0  0  0
 37 38  1  0  0  0
 38 39  2  0  0  0
 38 46  1  0  0  0
 39 40  1  0  0  0
 39 47  1  0  0  0
 40 41  1  0  0  0
 40 42  1  0  0  0
 42 48  1  0  0  0
 42 49  1  0  0  0
M  END
> <s_m_entry_id>
8152

> <s_m_entry_name>
entry

> <i_f3d_flags>
0

> <s_m_job_name>
adme_1000

> <r_psp_Prime_Energy>
-34133.5540429826

> <r_psp_Prime_Solv_GB>
-5194.1799158506

> <r_psp_Prime_Coulomb>
-26472.1378481643

> <r_psp_Prime_vdW>
-4063.9573801948

> <r_psp_Prime_Covalent>
4416.97446405368

> <i_psp_model_num>
0

> <r_psp_Prime_Lipo>
-2173.9011838093

> <s_psp_Prime_Energy_Force_Field>
S-OPLS

> <s_psp_Prime_Energy_Solvent_Model>
VSGB2.1

> <r_psp_Prime_Hbond>
-550.099645029719

> <r_psp_Prime_Packing>
-55.8446424272089

> <r_psp_Prime_SelfCont>
-40.4078915603482

> <r_psp_Memb1_x>
103.457542316003

> <r_psp_Memb1_y>
39.4731108300965

> <r_psp_Memb1_z>
48.7987221124676

> <r_psp_Memb2_x>
99.8134167309003

> <r_psp_Memb2_y>
2.81176945184187

> <r_psp_Memb2_z>
23.8404289603493

> <r_psp_MembDummyRadius>
4.45

> <r_psp_Prime_Bond_Covalent>
467.327660817664

> <r_psp_Prime_Bond_SGB>
49973.1850606815

> <r_psp_Prime_Angle_Covalent>
2224.75440847986

> <r_psp_Prime_Angle_SGB>
-21656.2072016365

> <r_psp_Prime_Torsion_Covalent>
1724.89239475615

> <r_psp_Prime_NB14_LJ>
4236.80620729985

> <r_psp_Prime_NB14_Lipo>
0

> <r_psp_Prime_NB14_Elec>
25570.1213357921

> <r_psp_Prime_NB14_SGB>
-15624.9329976481

> <r_psp_Prime_NBShort_LJ>
-7885.5022958679

> <r_psp_Prime_NBShort_Lipo>
-2173.9011838093

> <r_psp_Prime_NBShort_Elec>
-53062.3894241074

> <r_psp_Prime_NBShort_SGB>
18023.4005384805

> <r_psp_Prime_NBLong_LJ>
-415.261291626753

> <r_psp_Prime_NBLong_Lipo>
0

> <r_psp_Prime_NBLong_Elec>
1020.13024015105

> <r_psp_Prime_NBLong_SGB>
-1167.1824106363

> <r_psp_Prime_Self_SGB>
-34742.4429050917

> <s_m_Source_Path>
F:\Dekstop_files\DAC4,5\Molecular Systems Desgn and Engineering\supplementary_str

> <s_m_Source_File>
1000_str.mae

> <i_m_Source_File_Index>
823

> <i_lp_mmshare_version>
53156

> <s_epik_input>
W0NIM11jMVtjSF1bY0hdbihuMSlbQ0gyXWMoYyhjMjMpW2NIXVtjSF1bY0hdW2NIXTIpYyhbbkhdMylDKD1PKVtOSF1bQ0hdNFtDSDJdW0NIMl1bQ0gyXVtDSDJdW0NIMl00

> <s_epik_cmdline>
J2VwaWtfcHl0aG9uJywgJy1waHQnLCAnMC4wJywgJy1waCcsICc3LjAnLCAnLXRuJywgJzgnLCAnLW1hJywgJzUwMCcsICctaW1hZScsICc8aW5maWxlLm1hZT4nLCAnLW9tYWUnLCAnPG91dGZpbGUubWFlPic=

> <r_lp_tautomer_probability>
1

> <r_epik_Ionization_Penalty>
  0.0006

> <r_epik_Ionization_Penalty_Charging>
  0.0000

> <r_epik_Ionization_Penalty_Neutral>
  0.0006

> <r_epik_State_Penalty>
  0.0000

> <r_epik_Charging_Adjusted_Penalty>
0

> <i_epik_Tot_Q>
0

> <i_epik_Tot_abs_Q>
0

> <s_lp_Force_Field>
S-OPLS

> <r_lp_Energy>
32.454699

> <b_lp_Chiralities_Consistent>
1

> <s_lp_Variant>
ind_1,818218-1

> <s_i_glide_gridfile>
glide-grid_mmpl3

> <i_i_glide_lignum>
1202

> <i_i_glide_rotatable_bonds>
5

> <r_i_docking_score>
-8.35083632240699

> <r_i_glide_ligand_efficiency>
-0.33403345289628

> <r_i_glide_ligand_efficiency_sa>
-0.976719740377234

> <r_i_glide_ligand_efficiency_ln>
-1.97939846278075

> <r_i_glide_gscore>
-8.35083632240699

> <r_i_glide_evdw>
-42.8262786865234

> <r_i_glide_ecoul>
-0.49014139175415

> <r_i_glide_energy>
-43.3164200782776

> <r_i_glide_einternal>
2.09680438041687

> <r_i_glide_emodel>
-63.6745962727469

> <i_i_glide_confnum>
32

> <i_i_glide_posenum>
271

> <r_i_glide_eff_state_penalty>
0

> <i_rge_num_r_groups>
1

> <r_rge_occupation_R1>
1

> <s_rge_R1>
818218

> <s_rge_R1_s_m_title>
818218

> <s_rge_R1_s_m_entry_id>
16968

> <s_rge_R1_s_m_entry_name>
eMol_BB_r-groups.516

> <s_rge_R1_s_m_smiles>
[*]Cn(n1)ccc1C

> <b_rge_R1_b_sd_chiral_flag>
0

> <i_rge_R1_i_sd_version>
0

> <s_rge_R1_s_m_Source_File>
eMol_BB_r-groups-dedup.mae

> <i_rge_R1_i_m_Source_File_Index>
400

> <s_rge_R1_s_m_Source_Path>
/Users/konze/projects/pathfinder/r-groups

> <s_rge_R1_s_sd_Source_Path>
/Users/konze/projects/pathfinder/reactant sets/eMolecules

> <s_rge_R1_s_sd_Source_File>
eMol BB r-groups.mae

> <i_rge_R1_i_sd_Source_File_Index>
516

> <r_rge_R1_r_sd_MW>
96.1304

> <i_rge_R1_i_sd_RB>
0

> <i_rge_R1_i_sd_HeavyAtomCount>
7

> <i_rge_R1_i_sd_HBA>
1

> <i_rge_R1_i_sd_HBD>
0

> <r_rge_R1_r_sd_PSA>
17.82

> <i_rge_R1_i_sd_ChiralCenterCount>
0

> <i_rge_R1_i_sd_ChiralCenterCountAllPossible>
0

> <i_rge_R1_i_sd_RingCount>
1

> <r_rge_R1_r_sd_AlogP>
0.2919

> <s_rge_R1_s_sd_subgroup_title>
eMol BB r-groups

> <s_rge_R1_s_sd_subgroupid>
eMol BB r-groups

> <i_rge_R1_i_sd_subgroup_collapsed>
0

> <s_rge_R1_s_sd_Unique_SMILES_Stereo>
Cc1ccn(n1)C

> <i_rge_R1_i_sd_canvasUID>
460

> <s_rge_R1_s_canvas_Unique_SMILES_Stereo>
Cc1ccn(n1)C

> <s_psp_Prime_MMGBSA_Input_Structure_Hash>
a796f2670858c8cca1869abcd3d5d227839220d71d2d1cbd0cdbd34e

> <i_psp_number_heavy_atoms>
25

> <r_psp_MMGBSA_dG_Bind>
-44.6499118440624

> <r_psp_MMGBSA_dG_Bind_Coulomb>
4.48573257033422

> <r_psp_MMGBSA_dG_Bind_Covalent>
1.93119932135778

> <r_psp_MMGBSA_dG_Bind_Hbond>
-0.00203994653804784

> <r_psp_MMGBSA_dG_Bind_Lipo>
-22.0993566739639

> <r_psp_MMGBSA_dG_Bind_Packing>
4.9737991503207e-014

> <r_psp_MMGBSA_dG_Bind_SelfCont>
7.105427357601e-015

> <r_psp_MMGBSA_dG_Bind_Solv_GB>
21.0703970677305

> <r_psp_MMGBSA_dG_Bind_vdW>
-50.0358441829017

> <r_psp_Lig_Strain_Energy>
3.7057598680524

> <r_psp_Lig_Strain_Coulomb>
-0.0612648703337797

> <r_psp_Lig_Strain_Covalent>
1.93140018947028

> <r_psp_Lig_Strain_Hbond>
0

> <r_psp_Lig_Strain_Lipo>
-0.119546134705497

> <r_psp_Lig_Strain_Packing>
0

> <r_psp_Lig_Strain_SelfCont>
0

> <r_psp_Lig_Strain_Solv_GB>
-0.124447652953933

> <r_psp_Lig_Strain_vdW>
2.07961833657532

> <r_psp_Ligand_Energy>
6.34690959527074

> <r_psp_Ligand_Coulomb>
-17.7077667916354

> <r_psp_Ligand_Covalent>
24.6367389109084

> <r_psp_Ligand_Hbond>
0

> <r_psp_Ligand_Lipo>
-1.27719479785733

> <r_psp_Ligand_Packing>
0

> <r_psp_Ligand_SelfCont>
0

> <r_psp_Ligand_Solv_GB>
-8.69853255574102

> <r_psp_Ligand_vdW>
9.39366482959615

> <r_psp_Complex_Energy>
-34133.5540429826

> <r_psp_Complex_Coulomb>
-26472.1378481643

> <r_psp_Complex_Covalent>
4416.97446405368

> <r_psp_Complex_Hbond>
-550.099645029719

> <r_psp_Complex_Lipo>
-2173.9011838093

> <r_psp_Complex_Packing>
-55.8446424272089

> <r_psp_Complex_SelfCont>
-40.4078915603482

> <r_psp_Complex_Solv_GB>
-5194.1799158506

> <r_psp_Complex_vdW>
-4063.9573801948

> <r_psp_Receptor_Energy>
-34095.2510407338

> <r_psp_Receptor_Coulomb>
-26458.915813943

> <r_psp_Receptor_Covalent>
4390.40652582141

> <r_psp_Receptor_Hbond>
-550.097605083181

> <r_psp_Receptor_Lipo>
-2150.52463233748

> <r_psp_Receptor_Packing>
-55.8446424272089

> <r_psp_Receptor_SelfCont>
-40.4078915603482

> <r_psp_Receptor_Solv_GB>
-5206.55178036259

> <r_psp_Receptor_vdW>
-4023.31520084149

> <r_psp_MMGBSA_dG_Bind(NS)>
-48.3556717120664

> <r_psp_MMGBSA_dG_Bind(NS)_Coulomb>
4.54699744062964

> <r_psp_MMGBSA_dG_Bind(NS)_Covalent>
-0.000200868112187891

> <r_psp_MMGBSA_dG_Bind(NS)_Hbond>
-0.00203994653782047

> <r_psp_MMGBSA_dG_Bind(NS)_Lipo>
-21.9798105392533

> <r_psp_MMGBSA_dG_Bind(NS)_Packing>
0

> <r_psp_MMGBSA_dG_Bind(NS)_SelfCont>
0

> <r_psp_MMGBSA_dG_Bind(NS)_Solv_GB>
21.1948447206869

> <r_psp_MMGBSA_dG_Bind(NS)_vdW>
-52.1154625194813

> <r_psp_Rec_Strain_Energy>
-5.0931703299284e-011

> <r_psp_Rec_Strain_Coulomb>
4.00177668780088e-011

> <r_psp_Rec_Strain_Covalent>
-9.09494701772928e-013

> <r_psp_Rec_Strain_Hbond>
-2.27373675443232e-013

> <r_psp_Rec_Strain_Lipo>
-5.00222085975111e-012

> <r_psp_Rec_Strain_Packing>
4.9737991503207e-014

> <r_psp_Rec_Strain_SelfCont>
7.105427357601e-015

> <r_psp_Rec_Strain_Solv_GB>
-1.81898940354586e-012

> <r_psp_Rec_Strain_vdW>
4.54747350886464e-012

> <r_psp_Prime_MMGBSA_ligand_efficiency>
-1.7859964737625

> <r_psp_Prime_MMGBSA_ligand_efficiency_sa>
-2.67899471064375

> <r_psp_Prime_MMGBSA_ligand_efficiency_ln>
-10.5833671569268

> <r_i_glide_lipo>
-4.55329902379363

> <r_i_glide_hbond>
0

> <r_i_glide_metal>
0

> <r_i_glide_rewards>
-2.41700752684099

> <r_i_glide_erotb>
0.834305371316917

> <r_i_glide_esite>
0

> <i_psp_ExecuteFunction_Internal_Entry_Index>
1306

> <i_qp_#stars>
0

> <i_qp_#amine>
0

> <i_qp_#amidine>
0

> <i_qp_#acid>
0

> <i_qp_#amide>
0

> <i_qp_#rotor>
4

> <i_qp_#rtvFG>
0

> <i_qp_CNS>
0

> <r_qp_mol_MW>
   336.436

> <r_qp_dipole>
     6.737

> <r_qp_SASA>
   663.387

> <r_qp_FOSA>
   365.994

> <r_qp_FISA>
    53.017

> <r_qp_PISA>
   244.375

> <r_qp_WPSA>
     0.000

> <r_qp_volume>
  1153.338

> <r_qp_donorHB>
     2.000

> <r_qp_accptHB>
     4.000

> <r_qp_dip^2/V>
   0.0393508

> <r_qp_ACxDN^.5/SA>
   0.0085272

> <r_qp_glob>
   0.8017444

> <r_qp_QPpolrz>
    39.768

> <r_qp_QPlogPC16>
    11.486

> <r_qp_QPlogPoct>
    18.239

> <r_qp_QPlogPw>
     9.325

> <r_qp_QPlogPo/w>
     4.569

> <r_qp_QPlogS>
    -6.092

> <r_qp_CIQPlogS>
    -5.173

> <r_qp_QPlogHERG>
    -5.905

> <r_qp_QPPCaco>
  3112.721

> <r_qp_QPlogBB>
    -0.227

> <r_qp_QPPMDCK>
  1688.014

> <r_qp_QPlogKp>
    -1.252
[truncated: 906,558 more chars]
