# Supplementary material for: Molecular insights into Mmpl3 lead to the development of novel indole-2-carboxamides as antitubercular agents
Source: Royal Society of Chemistry journal article supplement (doi:10.1039/d1me00122a), 2022-01-01
Supplement: d1me00122a6.csv [file d1me00122a6.csv]

Sl No	Title	MMGBSA dG Bind (kcal/mol)	SMILES
1	ind_1,7334276	-45.087	c1cccc(c12)[nH]c(c2CNC(=O)CO)C(=O)NC3CCCCC3
2	ind_1,2864760	-45.348	C[NH2+]CC(=O)NCc1c([nH]c(c12)cccc2)C(=O)NC3CCCCC3
3	ind_1,480036	-26.97	C1CCCCC1NC(=O)c(c2CNCC[NH3+])[nH]c(c23)cccc3
4	ind_1,96364848	-27.686	C1CCCCC1NC(=O)c(c2C[C@@H](C[NH3+])NC)[nH]c(c23)cccc3
5	ind_1,476541	-34.981	C1CCCCC1NC(=O)c(c2C[C@@H](O)C[NH3+])[nH]c(c23)cccc3
6	ind_1,480036	-39.247	C1CCCCC1NC(=O)c(c2N(C)CC[NH3+])[nH]c(c23)cccc3
7	ind_1,96364848	-23.265	C1CCCCC1NC(=O)c(c2C[C@H](C[NH3+])NC)[nH]c(c23)cccc3
8	ind_1,477640	-39.816	OCCNC(=O)Cc1c([nH]c(c12)cccc2)C(=O)NC3CCCCC3
9	ind_1,96370904	-38.042	CNC(=O)[C@@H](O)Cc1c([nH]c(c12)cccc2)C(=O)NC3CCCCC3
10	ind_1,7334276	-44.16	c1cccc(c12)[nH]c(c2N(C)C(=O)CO)C(=O)NC3CCCCC3
11	ind_1,96370904	-42.167	CNC(=O)[C@H](O)Cc1c([nH]c(c12)cccc2)C(=O)NC3CCCCC3
12	ind_1,70145454	-43.015	c1cccc(c12)[nH]c(c2C[C@H](F)C(=O)N)C(=O)NC3CCCCC3
13	ind_1,96370904	-43.9	C[C@H](O)C(=O)NCc1c([nH]c(c12)cccc2)C(=O)NC3CCCCC3
14	ind_1,7334276	-43.077	CNC(=O)COc1c([nH]c(c12)cccc2)C(=O)NC3CCCCC3
15	ind_1,2864760	-39.608	CNC(=O)CN(C)c1c([nH]c(c12)cccc2)C(=O)NC3CCCCC3
16	ind_1,43618162	-32.55	C1CCCCC1NC(=O)c(c2C[C@H](C[NH3+])CO)[nH]c(c23)cccc3
17	ind_1,299958899	-44.574	C1CCCCC1NC(=O)c(c2N3C[C@@H](O)CC3=O)[nH]c(c24)cccc4
18	ind_1,96364848	-40.402	C1CCCCC1NC(=O)c(c2CN[C@H](C)C[NH3+])[nH]c(c23)cccc3
19	ind_1,53841667	-44.643	C1CCCCC1NC(=O)c(c2O[C@@H](C3=O)CCN3)[nH]c(c24)cccc4
20	ind_1,53841667	-44.935	C1CCCCC1NC(=O)c(c2N3CC[C@H](C3=O)O)[nH]c(c24)cccc4
21	ind_1,44834977	-44.894	C1CCCCC1NC(=O)c([nH]c(c23)cccc3)c2-c4c(=O)cn[nH]c4
22	ind_1,37686306	-19.45	c1cccc(c12)[nH]c(c2C[C@@](C)(C[NH3+])NC)C(=O)NC3CCCCC3
23	ind_1,889864	-44.559	c1cccc(c12)[nH]c(c2C[C@@](C)(C[NH3+])CO)C(=O)NC3CCCCC3
24	ind_1,37686306	-11.571	c1cccc(c12)[nH]c(c2C[C@](C)(C[NH3+])NC)C(=O)NC3CCCCC3
25	ind_1,299986297	-41.734	C1CCCCC1NC(=O)c([nH]c(c23)cccc3)c2N4CCC[C@@H]4C[NH3+]
26	ind_1,96370904	-41.425	c1cccc(c12)[nH]c(c2N(C)C(=O)[C@H](C)O)C(=O)NC3CCCCC3
27	ind_1,49638575	-41.073	C1CCCCC1NC(=O)c(c2C[C@@H](C[NH3+])N(C)C)[nH]c(c23)cccc3
28	ind_1,481883	-42.609	c1cccc(c12)[nH]c(c2C[C@@H](C)C(=O)N)C(=O)NC3CCCCC3
29	ind_1,43550978	-2.617	C1CCCCC1NC(=O)c(c2-c3cc(=O)[n-]o3)[nH]c(c24)cccc4
30	ind_1,483993	-41.862	C1CCCCC1NC(=O)c(c2N(C)CCO)[nH]c(c23)cccc3
31	ind_1,2737158	-43.987	C1CCCCC1NC(=O)c(c2C[C@H]([NH3+])CCO)[nH]c(c23)cccc3
32	ind_1,29939201	-42.156	C1CCCCC1NC(=O)c(c2CC3([NH3+])COC3)[nH]c(c24)cccc4
33	ind_1,43550978	1.503	C1CCCCC1NC(=O)c(c2-c3c(=O)[n-]oc3)[nH]c(c24)cccc4
34	ind_1,37686306	-42.083	C1CCCCC1NC(=O)c(c2CNC(C)(C)C[NH3+])[nH]c(c23)cccc3
35	ind_1,37717655	-36.133	c1cccc(c12)[nH]c(c2N(CC)C(=O)CO)C(=O)NC3CCCCC3
36	ind_1,96370904	-42.746	c1cccc(c12)[nH]c(c2N(C)C(=O)[C@@H](C)O)C(=O)NC3CCCCC3
37	ind_1,24632082	-43.696	c1cccc(c12)[nH]c(c2CC3(C(=O)N)CC3)C(=O)NC4CCCCC4
38	ind_1,313728376	-40.372	C1CCCCC1NC(=O)c(c2-c3c[nH]c(=O)o3)[nH]c(c24)cccc4
39	ind_1,3725474	-43.134	C1CCCCC1NC(=O)c([nH]c(c23)cccc3)c2-c4cncc(=O)[nH]4
40	ind_1,46014186	-35.738	C1CCCCC1NC(=O)c(c2Cn([nH]3)ccc3=O)[nH]c(c24)cccc4
41	ind_1,477640	-32.064	c1cccc(c12)[nH]c(c2N(C(=O)C)CCO)C(=O)NC3CCCCC3
42	ind_1,476541	-38.632	C1CCCCC1NC(=O)c(c2O[C@H](C)C[NH3+])[nH]c(c23)cccc3
43	ind_1,299961465	-43.295	C1CCCCC1NC(=O)c([nH]c(c23)cccc3)c2-c4cnc(=O)[nH]c4
44	ind_1,49638575	-32.067	C1CCCCC1NC(=O)c(c2C[C@H](C[NH3+])N(C)C)[nH]c(c23)cccc3
45	ind_1,313728376	-38.059	C1CCCCC1NC(=O)c(c2-c3coc(=O)[nH]3)[nH]c(c24)cccc4
46	ind_1,313498040	-39.667	C1CCCCC1NC(=O)c(c2C3=NCC(=O)O3)[nH]c(c24)cccc4
47	ind_1,6207827	-43.29	C1CCCCC1NC(=O)c([nH]c(c23)cccc3)c2-c4c(=O)[nH]cnc4
48	ind_1,46014186	-42.034	C1CCCCC1NC(=O)c([nH]c(c23)cccc3)c2-c4cc(=O)[nH]n4C
49	ind_1,46014186	-41.806	C1CCCCC1NC(=O)c(c2-c3c(=O)[nH]n(C)c3)[nH]c(c24)cccc4
50	ind_1,96487233	-42.871	C1CCCCC1NC(=O)c(c2CNC3(C[NH3+])CC3)[nH]c(c24)cccc4
51	ind_1,44471171	-41.367	C1CCCCC1NC(=O)c(c2-c3c(N)c[nH]c3)[nH]c(c24)cccc4
52	ind_1,299961721	-39.757	C1CCCCC1NC(=O)c(c2N(C3)CC[C@H]3O)[nH]c(c24)cccc4
53	ind_1,299961721	-39.327	C1CCCCC1NC(=O)c(c2N(C3)CC[C@@H]3O)[nH]c(c24)cccc4
54	ind_1,49638575	-45.163	C1CCCCC1NC(=O)c(c2CN(C)[C@H](C)C[NH3+])[nH]c(c23)cccc3
55	ind_1,300129592	-42.631	c1cccc(c12)[nH]c(c2C[C@]([NH3+])(CC)CO)C(=O)NC3CCCCC3
56	ind_1,498456	-32.767	C1CCCCC1NC(=O)c(c2-c3c[nH]nn3)[nH]c(c24)cccc4
57	ind_1,48577334	-43.028	C1CCCCC1NC(=O)c(c2-c3ccnnn3)[nH]c(c24)cccc4
58	ind_1,532575	-39.073	C1CCCCC1NC(=O)c(c2-c3nc[nH]n3)[nH]c(c24)cccc4
59	ind_1,49638575	-31.645	C1CCCCC1NC(=O)c(c2CN(C)[C@@H](C)C[NH3+])[nH]c(c23)cccc3
60	ind_1,96364848	-29.13	C1CCCCC1NC(=O)c(c2N(C)[C@@H](C)C[NH3+])[nH]c(c23)cccc3
61	ind_1,498456	-32.771	C1CCCCC1NC(=O)c(c2-c3c[nH]nn3)[nH]c(c24)cccc4
62	ind_1,44834977	-42.175	C1CCCCC1NC(=O)c(c2-c3c(=O)cc[nH]n3)[nH]c(c24)cccc4
63	ind_1,725480	-31.573	c1cccc(c12)[nH]c(c2C[C@H](C)CC(=O)N)C(=O)NC3CCCCC3
64	ind_1,6202259	-44.252	C1CCCCC1NC(=O)c(c2-c3cnncn3)[nH]c(c24)cccc4
65	ind_1,44826500	-39.203	C1CCCCC1NC(=O)c(c2-c3c[nH]c(=O)[nH]3)[nH]c(c24)cccc4
66	ind_1,44826500	-39.203	C1CCCCC1NC(=O)c(c2-c3c[nH]c(=O)[nH]3)[nH]c(c24)cccc4
67	ind_1,299986297	-38.512	C1CCCCC1NC(=O)c([nH]c(c23)cccc3)c2N4CCC[C@H]4C[NH3+]
68	ind_1,6202259	-44.773	C1CCCCC1NC(=O)c(c2-c3cncnn3)[nH]c(c24)cccc4
69	ind_1,32216461	-45.489	C1CCCCC1NC(=O)c(c2-c(c3CO)n[nH]c3)[nH]c(c24)cccc4
70	ind_1,96370904	-43.077	CNC(=O)[C@@H](C)Oc1c([nH]c(c12)cccc2)C(=O)NC3CCCCC3
71	ind_1,6207827	-41.41	C1CCCCC1NC(=O)c(c2-c3cc(=O)[nH]cn3)[nH]c(c24)cccc4
72	ind_1,2722737	-42.94	C1CCCCC1NC(=O)c(c2-c3c(CO)[nH]nc3)[nH]c(c24)cccc4
73	ind_1,300129592	-33.531	c1cccc(c12)[nH]c(c2C[C@@]([NH3+])(CC)CO)C(=O)NC3CCCCC3
74	ind_1,46342821	-41.852	C1CCCCC1NC(=O)c(c2-c3c(O)c[nH]n3)[nH]c(c24)cccc4
75	ind_1,299961465	-42.472	C1CCCCC1NC(=O)c([nH]c(c23)cccc3)c2-c4ccnc(=O)[nH]4
76	ind_1,299986284	-35.72	C1CCCCC1NC(=O)c(c2-c(c3CO)nc[nH]3)[nH]c(c24)cccc4
77	ind_1,533262	-45.033	C1CCCCC1NC(=O)c(c2-c3coc(=O)o3)[nH]c(c24)cccc4
78	ind_1,300578378	-39.535	C1CCCCC1NC(=O)c(c2-c3c(c[nH]n3)NC)[nH]c(c24)cccc4
79	ind_1,44750322	-41.006	C1CCCCC1NC(=O)c(c2C[C@@](C)([NH3+])[C@H](C)O)[nH]c(c23)cccc3
80	ind_1,40902155	-42.008	C1CCCCC1NC(=O)c([nH]c(c23)cccc3)c2C[C@]4([NH3+])CCOC4
81	ind_1,36009143	-39.417	C1CCCCC1NC(=O)c(c2-c(ocn3)c3CO)[nH]c(c24)cccc4
82	ind_1,49262649	-39.992	C1CCCCC1NC(=O)c(c2C[C@H](C3=O)CCN3)[nH]c(c24)cccc4
83	ind_1,37686306	-30.952	c1cccc(c12)[nH]c(c2N(C)C(C)(C)C[NH3+])C(=O)NC3CCCCC3
84	ind_1,11644167	-35.87	C1CCCCC1NC(=O)c(c2-c(nco3)c3CO)[nH]c(c24)cccc4
85	ind_1,64093046	-45.382	C1CCCCC1NC(=O)c(c2[C@H]3OC=CC3=O)[nH]c(c24)cccc4
86	ind_1,89939958	-23.332	C1CCCCC1NC(=O)c(c2C[C@@]3(C[NH3+])CCO3)[nH]c(c24)cccc4
87	ind_1,816564	-32.654	C1CCCCC1NC(=O)c([nH]c(c23)cccc3)c2Cn(c4)ncc4N
88	ind_1,532575	-38.205	C1CCCCC1NC(=O)c(c2-c3ncn[nH]3)[nH]c(c24)cccc4
89	ind_1,44471171	-40.96	C1CCCCC1NC(=O)c(c2-c3cc(N)c[nH]3)[nH]c(c24)cccc4
90	ind_1,44750322	-25.396	C1CCCCC1NC(=O)c(c2C[C@H](O)C(C)(C)[NH3+])[nH]c(c23)cccc3
91	ind_1,40331672	-40.571	C1CCCCC1NC(=O)c(c2-c(c3C[NH3+])c[nH]c3)[nH]c(c24)cccc4
92	ind_1,32216461	-42.661	C1CCCCC1NC(=O)c(c2-c(c3CO)[nH]nc3)[nH]c(c24)cccc4
93	ind_1,36251638	-44.359	N#Cc1ncc(o1)-c2c([nH]c(c23)cccc3)C(=O)NC4CCCCC4
94	ind_1,299972045	-44.974	c1cccc(c12)[nH]c(c2CC[C@@H](C)C(=O)N)C(=O)NC3CCCCC3
95	ind_1,48552522	-43.021	c1cccc(c12)[nH]c(c2-c(c3C#N)cno3)C(=O)NC4CCCCC4
96	ind_1,299972045	-34.719	c1cccc(c12)[nH]c(c2C[C@H](C(=O)N)CC)C(=O)NC3CCCCC3
97	ind_1,35860266	-43.339	c1cccc(c12)[nH]c(c2-c(c3C#N)con3)C(=O)NC4CCCCC4
98	ind_1,299972045	-38.401	c1cccc(c12)[nH]c(c2CC[C@H](C)C(=O)N)C(=O)NC3CCCCC3
99	ind_1,37905017	-38.63	C1CCCCC1NC(=O)c(c2-c(c3CO)onc3)[nH]c(c24)cccc4
100	ind_1,300548931	-44.505	C1CCCCC1NC(=O)c(c2C[C@H]([NH3+])COC)[nH]c(c23)cccc3
101	ind_1,299966580	-41.028	C1CCCCC1NC(=O)c([nH]c(c23)cccc3)c2N(C4)CCC[C@@H]4O
102	ind_1,299966580	-42.887	C1CCCCC1NC(=O)c([nH]c(c23)cccc3)c2N(C4)CCC[C@H]4O
103	ind_1,7345228	-41.412	C1CCCCC1NC(=O)c([nH]c(c23)cccc3)c2-c4cc(=O)[nH]nc4
104	ind_1,24757104	-35.32	C1CCCCC1NC(=O)c(c2-c3c(O)n[nH]c3)[nH]c(c24)cccc4
105	ind_1,29916045	-40.618	C1CCCCC1NC(=O)c([nH]c(c23)cccc3)c2C[NH2+]C4COC4
106	ind_1,25606960	-43.809	c1cccc(c12)[nH]c(c2-c(c3C#N)ocn3)C(=O)NC4CCCCC4
107	ind_1,299972045	-41.08	c1cccc(c12)[nH]c(c2C[C@@H](C(=O)N)CC)C(=O)NC3CCCCC3
108	ind_1,300055770	-44.438	C1CCCCC1NC(=O)c(c2C[C@H](C[NH3+])OC)[nH]c(c23)cccc3
109	ind_1,6207827	-37.283	C1CCCCC1NC(=O)c([nH]c(c23)cccc3)c2-c4nccc(=O)[nH]4
110	ind_1,300578378	-37.634	C1CCCCC1NC(=O)c([nH]c(c23)cccc3)c2N(C)c4cn[nH]c4
111	ind_1,45988855	-37.189	C1CCCCC1NC(=O)c(c2O[C@H](CC)C[NH3+])[nH]c(c23)cccc3
112	ind_1,50081037	-43.236	C1CCCCC1NC(=O)c([nH]c(c23)cccc3)c2CCNC(=O)NC
113	ind_1,2722146	-37.742	C1CCCCC1NC(=O)c([nH]c(c23)cccc3)c2-c4nnnn4C
114	ind_1,207613278	-41.833	C1CCCCC1NC(=O)c(c2[C@H](C(=O)O3)N=C3C)[nH]c(c24)cccc4
115	ind_1,37905017	-44.607	C1CCCCC1NC(=O)c(c2-c(c3CO)noc3)[nH]c(c24)cccc4
116	ind_1,43340698	-41.207	c1cccc(c12)[nH]c(c2-c(c3C#N)nco3)C(=O)NC4CCCCC4
117	ind_1,486536	-39.391	C1CCCCC1NC(=O)c([nH]c(c23)cccc3)c2N4CCC[C@@H]4CO
118	ind_1,207613278	-42.176	C1CCCCC1NC(=O)c(c2[C@@H](C(=O)O3)N=C3C)[nH]c(c24)cccc4
119	ind_1,49262649	-39.345	C1CCCCC1NC(=O)c(c2C[C@@H](C3=O)CCN3)[nH]c(c24)cccc4
120	ind_1,50090622	-43.95	C1CCCCC1NC(=O)c(c2-c3cc(co3)N)[nH]c(c24)cccc4
121	ind_1,64093046	-43.497	C1CCCCC1NC(=O)c(c2C3=COCC3=O)[nH]c(c24)cccc4
122	ind_1,2722737	-44.777	C1CCCCC1NC(=O)c(c2-c(n[nH]3)cc3CO)[nH]c(c24)cccc4
123	ind_1,3763299	-34.206	C1CCCCC1NC(=O)c(c2-n([nH]3)c(=O)cc3C)[nH]c(c24)cccc4
124	ind_1,44471171	-40.668	C1CCCCC1NC(=O)c(c2-c3c(N)cc[nH]3)[nH]c(c24)cccc4
125	ind_1,816564	-40.691	C1CCCCC1NC(=O)c(c2-c3c(N)cn(n3)C)[nH]c(c24)cccc4
126	ind_1,50090622	-45.326	C1CCCCC1NC(=O)c(c2-c3c(N)coc3)[nH]c(c24)cccc4
127	ind_1,195122630	-35.433	C1CCCCC1NC(=O)c([nH]c(c23)cccc3)c2N[C@@H]4CC[NH2+]C4
128	ind_1,299958645	-35.433	C1CCCCC1NC(=O)c([nH]c(c23)cccc3)c2N[C@@H]4CC[NH2+]C4
129	ind_1,89944458	-45.46	C1CCCCC1NC(=O)c(c2C[C@@H](N3)CCC3=O)[nH]c(c24)cccc4
130	ind_1,3801196	-43.187	C1CCCCC1NC(=O)c([nH]c(c23)cccc3)c2Cc4c[nH]c(=O)[nH]4
131	ind_1,299986284	-38.169	C1CCCCC1NC(=O)c([nH]c(c23)cccc3)c2-c(n4)[nH]cc4CO
132	ind_1,46342821	-36.763	C1CCCCC1NC(=O)c(c2-c3c(O)cn[nH]3)[nH]c(c24)cccc4
133	ind_1,816564	-44.562	C1CCCCC1NC(=O)c([nH]c(c23)cccc3)c2-c4c(N)cnn4C
134	ind_1,300055770	-39.966	C1CCCCC1NC(=O)c(c2CO[C@@H](C)C[NH3+])[nH]c(c23)cccc3
135	ind_1,301149300	-38.465	C1CCCCC1NC(=O)c(c2N(C)[C@H]3C[C@@H](C3)O)[nH]c(c24)cccc4
136	ind_1,6202259	-41.008	C1CCCCC1NC(=O)c(c2-c3nccnn3)[nH]c(c24)cccc4
137	ind_1,53993028	-42.921	C1CCCCC1NC(=O)c(c2C3=CC(=O)NC3)[nH]c(c24)cccc4
138	ind_1,33510681	-45.141	c1cccc(c12)[nH]c(c2-c(c3C#N)onc3)C(=O)NC4CCCCC4
139	ind_1,39587887	-38.316	C1CCCCC1NC(=O)c(c2-c3c(con3)NC)[nH]c(c24)cccc4
140	ind_1,33510681	-44.372	c1cccc(c12)[nH]c(c2-c(c3C#N)noc3)C(=O)NC4CCCCC4
141	ind_1,44834977	-42.481	C1CCCCC1NC(=O)c(c2-n(nc3)ccc3=O)[nH]c(c24)cccc4
142	ind_1,56750753	0.067	C1CCCCC1NC(=O)c(c2C[C@H]([NH3+])C3(O)CC3)[nH]c(c24)cccc4
143	ind_1,3801196	-33.854	C1CCCCC1NC(=O)c(c2-c(c3C)[nH]c(=O)[nH]3)[nH]c(c24)cccc4
144	ind_1,532571	-41.801	C1CCCCC1NC(=O)c(c2-c3ncncn3)[nH]c(c24)cccc4
145	ind_1,46021609	-45.299	C1CCCCC1NC(=O)c(c2[C@H](O3)C=CC3=O)[nH]c(c24)cccc4
146	ind_1,483514	-44.985	C1CCCCC1NC(=O)c(c2N(C)C(=O)NC)[nH]c(c23)cccc3
147	ind_1,300548931	-41.946	C1CCCCC1NC(=O)c(c2COC[C@H](C)[NH3+])[nH]c(c23)cccc3
148	ind_1,485608	-44.082	C1CCCCC1NC(=O)c([nH]c(c23)cccc3)c2N4CCOCC4
149	ind_1,50414663	-41.972	C1CCCCC1NC(=O)c(c2C[N@H+](C)[C@H](C)CO)[nH]c(c23)cccc3
150	ind_1,96093646	-43.625	C1CC1(C#N)NCc2c([nH]c(c23)cccc3)C(=O)NC4CCCCC4
151	ind_1,50090622	-38.962	C1CCCCC1NC(=O)c(c2-c3c(N)cco3)[nH]c(c24)cccc4
152	ind_1,50414663	-31.365	C1CCCCC1NC(=O)c(c2C[C@H](CO)[NH+](C)C)[nH]c(c23)cccc3
153	ind_1,39587887	-42.23	C1CCCCC1NC(=O)c(c2-c3c(cno3)NC)[nH]c(c24)cccc4
154	ind_1,44600313	-42.954	C1CCCCC1NC(=O)c(c2N(C)[C@H](C)CO)[nH]c(c23)cccc3
155	ind_1,3791844	-45.124	C1CCCCC1NC(=O)c([nH]c(c23)cccc3)c2N(C4)CC[C@H]4CO
156	ind_1,302112519	-41.164	C1CCCCC1NC(=O)c(c2CNC3(CO)CC3)[nH]c(c24)cccc4
157	ind_1,44600313	-29.551	C1CCCCC1NC(=O)c(c2N(C)[C@@H](C)CO)[nH]c(c23)cccc3
158	ind_1,32441755	-42.237	C1CCCCC1NC(=O)c(c2O[C@H](C[NH3+])C3CC3)[nH]c(c24)cccc4
159	ind_1,476090	-44.082	C1CCCCC1NC(=O)c(c2N[C@@H](C)CO)[nH]c(c23)cccc3
160	ind_1,31416273	-21.388	c1cccc(c12)[nH]c(c2C[C@@](O)(CC)C[NH3+])C(=O)NC3CCCCC3
161	ind_1,300052745	-43.886	N#C[C@@H]1CCCN1c2c([nH]c(c23)cccc3)C(=O)NC4CCCCC4
162	ind_1,28202185	-42.873	C1CCCCC1NC(=O)c(c2-c3c(C[NH3+])[nH]cc3)[nH]c(c24)cccc4
163	ind_1,31416273	-37.006	c1cccc(c12)[nH]c(c2C[C@](O)(CC)C[NH3+])C(=O)NC3CCCCC3
164	ind_1,3725411	-40.85	C1CCCCC1NC(=O)c(c2-c3nnco3)[nH]c(c24)cccc4
165	ind_1,53989571	-23.645	C1CCCCC1NC(=O)c(c2-c3c([O-])[nH]c[nH+]3)[nH]c(c24)cccc4
166	ind_1,107021763	46.579	C1CCCCC1NC(=O)c(c2-c3c([O-])onc3)[nH]c(c24)cccc4
167	ind_1,53989571	-25.749	C1CCCCC1NC(=O)c(c2Oc3c[nH]cn3)[nH]c(c24)cccc4
168	ind_1,46014186	-32.73	C1CCCCC1NC(=O)c(c2-n3n(C)ccc3=O)[nH]c(c24)cccc4
169	ind_1,3791844	-21.295	C1CCCCC1NC(=O)c([nH]c(c23)cccc3)c2N(C4)CC[C@@H]4CO
170	ind_1,46342821	-42.466	C1CCCCC1NC(=O)c([nH]c(c23)cccc3)c2Oc4cn[nH]c4
171	ind_1,39587887	-45.456	C1CCCCC1NC(=O)c([nH]c(c23)cccc3)c2N(C)c4cnoc4
172	ind_1,24757104	-45.37	C1CCCCC1NC(=O)c(c2-c3cc(O)n[nH]3)[nH]c(c24)cccc4
173	ind_1,53993028	-41.141	C1CCCCC1NC(=O)c(c2C3=CCNC3=O)[nH]c(c24)cccc4
174	ind_1,49839942	-23.567	C1CCCCC1NC(=O)c(c2C[C@]3(CO)CCO3)[nH]c(c24)cccc4
175	ind_1,30153356	-40.18	c1cccc(c12)[nH]c(c2N(C)C(=O)CCO)C(=O)NC3CCCCC3
176	ind_1,107021763	36.611	C1CCCCC1NC(=O)c(c2-c3cc([O-])on3)[nH]c(c24)cccc4
177	ind_1,476541	-39.686	C1CCCCC1NC(=O)c(c2NC[C@H](C)O)[nH]c(c23)cccc3
178	ind_1,53989571	-7.342	C1CCCCC1NC(=O)c(c2-c3[nH]c([O-])c[nH+]3)[nH]c(c24)cccc4
179	ind_1,96093646	-45.186	c1cccc(c12)[nH]c(c2N(C)C3(C#N)CC3)C(=O)NC4CCCCC4
180	ind_1,64093048	-41.646	C1CCCCC1NC(=O)c(c2Cc3c(O)c[nH]n3)[nH]c(c24)cccc4
181	ind_1,13312451	-44.87	C1CCCCC1NC(=O)c(c2NC3COC3)[nH]c(c24)cccc4
182	ind_1,92490803	-40.227	C1CCCCC1NC(=O)c(c2-c(c3C)nn[nH]3)[nH]c(c24)cccc4
183	ind_1,46021609	-41.453	C1CCCCC1NC(=O)c(c2C3=CCOC3=O)[nH]c(c24)cccc4
184	ind_1,36251933	-44.03	C1CCCCC1NC(=O)c([nH]c(c23)cccc3)c2N4CC[C@H]4C[NH3+]
185	ind_1,482286	-43.36	CCNC(=O)Cc1c([nH]c(c12)cccc2)C(=O)NC3CCCCC3
186	ind_1,71009266	-30.625	C1CCCCC1NC(=O)c([nH]c(c23)cccc3)c2N[C@@]4(C)CC[NH2+]C4
187	ind_1,56973401	-28.897	C1CCCCC1NC(=O)c(c2C[C@]3(C)[C@H]([NH3+])CN3)[nH]c(c24)cccc4
188	ind_1,881802	-43.617	C1CCCCC1NC(=O)c(c2CN(C)C(=O)NC)[nH]c(c23)cccc3
189	ind_1,48605068	-38.708	C1CCCCC1NC(=O)c(c2C[C@H]([NH3+])C(C)(C)O)[nH]c(c23)cccc3
190	ind_1,28145178	-33.907	C1CCCCC1NC(=O)c(c2CC3(C[NH3+])COC3)[nH]c(c24)cccc4
191	ind_1,96217728	-35.409	C1CCCCC1NC(=O)c(c2[C@@H](C3=O)OC=C3C)[nH]c(c24)cccc4
192	ind_1,480331	-39.573	C1CCCCC1NC(=O)c(c2N(CC3)CCC3O)[nH]c(c24)cccc4
193	ind_1,475715	-43.422	C1CCCCC1NC(=O)c(c2N(C3=O)CCN3)[nH]c(c24)cccc4
194	ind_1,43618162	-31.208	C1CCCCC1NC(=O)c(c2OC[C@H](C)C[NH3+])[nH]c(c23)cccc3
195	ind_1,916455	-34.773	C1CCCCC1NC(=O)c(c2CC(F)(F)C[NH3+])[nH]c(c23)cccc3
196	ind_1,32239203	-42.506	C1CCCCC1NC(=O)c(c2C[C@@H](CN3)NC3=O)[nH]c(c24)cccc4
197	ind_1,39913652	-37.825	C1CCCCC1NC(=O)c(c2N(CC)C3COC3)[nH]c(c24)cccc4
198	GR-16	-42.696	C1CCCCC1NC(=O)c([nH]c(c23)cccc3)c2C[N@@H+](CC4)CC[C@@H]4O
199	ind_1,49839942	-35.684	C1CCCCC1NC(=O)c(c2C[C@@]3(CO)CCO3)[nH]c(c24)cccc4
200	ind_1,275047307	-40.739	C1CCCCC1NC(=O)c(c2C3=C(O)CN=C3)[nH]c(c24)cccc4
201	ind_1,49862210	-43.842	C1CCCCC1NC(=O)c(c2C[N@@H+](C)C[C@@H](C)O)[nH]c(c23)cccc3
202	ind_1,33508558	-38.429	C1CCCCC1NC(=O)c(c2Cc3cc(co3)N)[nH]c(c24)cccc4
203	ind_1,299980931	-42.548	c1cccc(c12)[nH]c(c2N(C)C(C)(C)CO)C(=O)NC3CCCCC3
204	ind_1,4927271	-41.792	C1CCCCC1NC(=O)c(c2N(C)C[C@@H](C)O)[nH]c(c23)cccc3
205	ind_1,43550978	-41.782	C1CCCCC1NC(=O)c(c2-n3occc3=O)[nH]c(c24)cccc4
206	ind_1,44826500	-39.687	C1CCCCC1NC(=O)c(c2-n(c3=O)cc[nH]3)[nH]c(c24)cccc4
207	ind_1,56973401	-43.52	C1CCCCC1NC(=O)c(c2C[C@]3(C)[C@@H]([NH3+])CN3)[nH]c(c24)cccc4
208	ind_1,521835	-43.808	C1CCCCC1NC(=O)c([nH]c(c23)cccc3)c2-c4ccc(=O)[nH]c4
209	ind_1,33508558	-43.273	C1CCCCC1NC(=O)c([nH]c(c23)cccc3)c2-c4c(C)occ4N
210	ind_1,275047307	-44.205	C1CCCCC1NC(=O)c([nH]c(c23)cccc3)c2[C@@H]4N=CC=C4O
211	ind_1,521835	-40.274	C1CCCCC1NC(=O)c([nH]c(c23)cccc3)c2-c4cc(=O)[nH]cc4
212	ind_1,2726601	-43.802	C1CCCCC1NC(=O)c(c2-c([nH]n3)nc3C)[nH]c(c24)cccc4
213	ind_1,44471171	-40.616	C1CCCCC1NC(=O)c(c2-n(c3)ccc3N)[nH]c(c24)cccc4
214	ind_1,53993028	-32.799	C1CCCCC1NC(=O)c(c2N3CC=CC3=O)[nH]c(c24)cccc4
215	ind_1,49781622	-42.348	C1CCCCC1NC(=O)c(c2-c3cc(N)[nH]c3)[nH]c(c24)cccc4
216	ind_1,513823	-41.835	C1CCCCC1NC(=O)c([nH]c(c23)cccc3)c2-c(o4)ccc4C[NH3+]
217	ind_1,44826537	-45.392	C1CCCCC1NC(=O)c([nH]c(c23)cccc3)c2-c4cnnc(n4)C
218	ind_1,303954565	-44.246	C1CCCCC1NC(=O)c([nH]c(c23)cccc3)c2CNc4c[nH]cn4
219	ind_1,918631	-42.851	c1cccc(c12)[nH]c(c2-c3cn(C#N)cn3)C(=O)NC4CCCCC4
220	ind_1,7476628	-41.77	C1CCCCC1NC(=O)c([nH]c(c23)cccc3)c2N4CCOC[C@@H]4C
221	ind_1,7476628	-31.386	C1CCCCC1NC(=O)c([nH]c(c23)cccc3)c2N4CCOC[C@H]4C
222	ind_1,300078428	-45.038	c1cccc(c12)[nH]c(c2NC3(C#N)CC3)C(=O)NC4CCCCC4
223	ind_1,531205	-33.752	C1CCCCC1NC(=O)c(c2-c3cn[nH]c3)[nH]c(c24)cccc4
224	ind_1,10872246	-36.788	C1CCCCC1NC(=O)c(c2-c3ncc(cn3)O)[nH]c(c24)cccc4
225	ind_1,168893720	-44.942	C1CCCCC1NC(=O)c(c2C[C@@]3(C)[C@@H](CO3)O)[nH]c(c24)cccc4
226	ind_1,49862210	-35.182	C1CCCCC1NC(=O)c(c2C[C@H](O)C[NH+](C)C)[nH]c(c23)cccc3
227	ind_1,275047307	-42.084	C1CCCCC1NC(=O)c([nH]c(c23)cccc3)c2[C@H]4N=CC=C4O
228	ind_1,514577	-35.388	C1CCCCC1NC(=O)c(c2-c3c[nH]cn3)[nH]c(c24)cccc4
229	ind_1,50081037	-40.322	C1CCCCC1NC(=O)c(c2N(CC)C(=O)NC)[nH]c(c23)cccc3
230	ind_1,514577	-35.361	C1CCCCC1NC(=O)c(c2-c3c[nH]cn3)[nH]c(c24)cccc4
231	ind_1,194444379	-45.212	C1CCCCC1NC(=O)c([nH]c(c23)cccc3)c2[C@H]4OC(=O)C=C4C
232	ind_1,194444379	-41.653	C1CCCCC1NC(=O)c([nH]c(c23)cccc3)c2[C@@H]4OC(=O)C=C4C
233	ind_1,44151683	-41.666	C1CCCCC1NC(=O)c(c2-c(o3)nnc3C)[nH]c(c24)cccc4
234	ind_1,537499	-34.83	CC(=O)NC(=O)Cc1c([nH]c(c12)cccc2)C(=O)NC3CCCCC3
235	ind_1,49834125	-44.347	C1CCCCC1NC(=O)c([nH]c(c23)cccc3)c2N(C)[C@H]4CCOC4
236	ind_1,299986367	-42.667	C1CCCCC1NC(=O)c([nH]c(c23)cccc3)c2N4CCCOCC4
237	ind_1,275047307	-44.511	C1CCCCC1NC(=O)c(c2C3=NCC(=C3)O)[nH]c(c24)cccc4
238	ind_1,265081377	-41.715	C1CCCCC1NC(=O)c([nH]c(c23)cccc3)c2C[C@H]4OC=CC4=O
239	ind_1,36835163	-34.933	C1CCCCC1NC(=O)c(c2-c(c3CO)c[nH]c3)[nH]c(c24)cccc4
240	ind_1,265081377	-42.813	C1CCCCC1NC(=O)c(c2C3=CO[C@H](C)C3=O)[nH]c(c24)cccc4
241	ind_1,194829019	-42.669	C1CCCCC1NC(=O)c([nH]c(c23)cccc3)c2C[NH2+]C[C@@H]4CCO4
242	ind_1,32441755	-37.756	C1CCCCC1NC(=O)c(c2O[C@@H](C[NH3+])C3CC3)[nH]c(c24)cccc4
243	ind_1,32447503	-44.959	C1CCCCC1NC(=O)c([nH]c(c23)cccc3)c2-c4nc(N)cn4C
244	ind_1,32239203	-43.094	C1CCCCC1NC(=O)c(c2N(C3=O)[C@H](C)CN3)[nH]c(c24)cccc4
245	ind_1,486394	-15.871	C1CCCCC1NC(=O)c(c2OC[C@@H]([NH3+])C(C)C)[nH]c(c23)cccc3
246	ind_1,6237769	-42.979	C1CC1C(=O)NCc2c([nH]c(c23)cccc3)C(=O)NC4CCCCC4
247	ind_1,44826500	-36.218	C1CCCCC1NC(=O)c([nH]c(c23)cccc3)c2Oc4ncc[nH]4
248	ind_1,64093048	-44.424	C1CCCCC1NC(=O)c(c2-c([nH]n3)c(O)c3C)[nH]c(c24)cccc4
249	ind_1,44817196	-43.876	C1CCCCC1NC(=O)c(c2N3CCCC3=O)[nH]c(c24)cccc4
250	ind_1,486536	-37.587	C1CCCCC1NC(=O)c([nH]c(c23)cccc3)c2N4CCC[C@H]4CO
251	ind_1,37350772	-34.504	CNC(=O)[C@H](C)Cc1c([nH]c(c12)cccc2)C(=O)NC3CCCCC3
252	ind_1,195292628	-42.358	C1CCCCC1NC(=O)c([nH]c(c23)cccc3)c2-c4nnn(n4)CC
253	ind_1,265081377	-44.041	C1CCCCC1NC(=O)c([nH]c(c23)cccc3)c2C[C@@H]4OC=CC4=O
254	ind_1,728153	-41.987	C1CCCCC1NC(=O)c(c2-c3ccncn3)[nH]c(c24)cccc4
255	ind_1,300657948	-42.257	C1CCCCC1NC(=O)c(c2N(C)C3(C)COC3)[nH]c(c24)cccc4
256	ind_1,37196068	-31.996	CNC(=O)CCCc1c([nH]c(c12)cccc2)C(=O)NC3CCCCC3
257	ind_1,44689002	-28.614	C1CCCCC1NC(=O)c([nH]c(c23)cccc3)c2Cn(c4)ccc4N
258	ind_1,45978243	26.111	C1CCCCC1NC(=O)c(c2Cc3cc([O-])on3)[nH]c(c24)cccc4
259	ind_1,36726544	-43.085	C1CCCCC1NC(=O)c([nH]c(c23)cccc3)c2-c4ncc(N)n4C
260	ind_1,2871917	-44.067	C1CCCCC1NC(=O)c(c2N(CCO3)C[C@@H]3C)[nH]c(c24)cccc4
261	ind_1,33508558	-40.576	C1CCCCC1NC(=O)c(c2-c3c(N)cc(o3)C)[nH]c(c24)cccc4
262	ind_1,3763299	-39.096	C1CCCCC1NC(=O)c([nH]c(c23)cccc3)c2-c4c(C)[nH]nc4O
263	ind_1,49781622	-38.154	C1CCCCC1NC(=O)c(c2-c3c(N)[nH]cc3)[nH]c(c24)cccc4
264	ind_1,107021763	-39.86	C1CCCCC1NC(=O)c(c2Oc3ccno3)[nH]c(c24)cccc4
265	ind_1,483509	-33.603	C1CCCCC1NC(=O)c(c2OCC[NH+](C)C)[nH]c(c23)cccc3
266	ind_1,29391722	-42.22	C1CCCCC1NC(=O)c(c2-c3cc(N)oc3)[nH]c(c24)cccc4
267	ind_1,96198513	-43.922	C1CCCCC1NC(=O)c(c2-c(c3C)[nH]nc3O)[nH]c(c24)cccc4
268	ind_1,275047307	-45.149	C1CCCCC1NC(=O)c(c2N(C3)C=CC3=O)[nH]c(c24)cccc4
269	ind_1,889061	-39.122	CC(=O)NCCCc1c([nH]c(c12)cccc2)C(=O)NC3CCCCC3
270	ind_1,479284	-42.755	C1CCCCC1NC(=O)c([nH]c(c23)cccc3)c2-c4cc(=O)cc[nH]4
271	ind_1,11488405	-42.839	c1cccc(c12)[nH]c(c2C[C@](C)(C[NH3+])OC)C(=O)NC3CCCCC3
272	ind_1,31416273	-38.659	c1cccc(c12)[nH]c(c2O[C@@](C)(CC)C[NH3+])C(=O)NC3CCCCC3
273	ind_1,313496242	-43.977	C1CCCCC1NC(=O)c(c2[C@H](OC3=O)C=C3C)[nH]c(c24)cccc4
274	ind_1,498456	-43.054	C1CCCCC1NC(=O)c(c2-n3ccnn3)[nH]c(c24)cccc4
275	ind_1,107021846	17.743	C1CCCCC1NC(=O)c([nH]c(c23)cccc3)c2Cc4c([O-])onc4
276	ind_1,45978243	28.44	C1CCCCC1NC(=O)c(c2-c3c(C)noc3[O-])[nH]c(c24)cccc4
277	ind_1,107021846	26.921	C1CCCCC1NC(=O)c(c2-c(c3C)noc3[O-])[nH]c(c24)cccc4
278	ind_1,521835	-41.313	C1CCCCC1NC(=O)c([nH]c(c23)cccc3)c2-c4cccc(=O)[nH]4
279	ind_1,29939201	0.921	C1CCCCC1NC(=O)c(c2NC3(C)COC3)[nH]c(c24)cccc4
280	ind_1,106963900	-28.616	C1CCCCC1NC(=O)c(c2-c3cc(=O)n(o3)C)[nH]c(c24)cccc4
281	ind_1,89944458	-41.53	C1CCCCC1NC(=O)c(c2N3[C@H](C)CCC3=O)[nH]c(c24)cccc4
282	ind_1,32239203	-33.538	C1CCCCC1NC(=O)c(c2N(C3=O)[C@@H](C)CN3)[nH]c(c24)cccc4
283	ind_1,49781622	-35.297	C1CCCCC1NC(=O)c(c2-c3ccc(N)[nH]3)[nH]c(c24)cccc4
284	ind_1,301002361	-41.182	C1CCCCC1NC(=O)c(c2N[C@@]3(C)C[C@@H](C3)O)[nH]c(c24)cccc4
285	ind_1,301002361	-38.66	C1CCCCC1NC(=O)c(c2N[C@]3(C)C[C@@H](C3)O)[nH]c(c24)cccc4
286	ind_1,64093048	-40.407	C1CCCCC1NC(=O)c(c2Oc(c3C)c[nH]n3)[nH]c(c24)cccc4
287	ind_1,479284	-41.213	C1CCCCC1NC(=O)c([nH]c(c23)cccc3)c2-c4c(=O)cc[nH]c4
288	ind_1,194829019	-38.954	C1CCCCC1NC(=O)c(c2N(C)C[C@@H]3CCO3)[nH]c(c24)cccc4
289	ind_1,4326338	-38.515	c1cccc(c12)[nH]c(c2-c(c3C#N)c[nH]c3)C(=O)NC4CCCCC4
290	ind_1,539088	-39.018	C1CCCCC1NC(=O)c([nH]c(c23)cccc3)c2-c4c(C)onc4O
291	ind_1,531205	-39.991	C1CCCCC1NC(=O)c(c2-c3cc[nH]n3)[nH]c(c24)cccc4
292	ind_1,46306641	-41.601	C1CCCCC1NC(=O)c(c2-c3c(NC)n[nH]c3)[nH]c(c24)cccc4
293	ind_1,266611315	-41.446	C1CCCCC1NC(=O)c([nH]c(c23)cccc3)c2Cn(n4)ccc4N
294	ind_1,521853	-36.743	C1CCCCC1NC(=O)c([nH]c(c23)cccc3)c2-c4cc([O-])c[nH+]c4
295	ind_1,521835	-44.399	C1CCCCC1NC(=O)c([nH]c(c23)cccc3)c2-c4c(=O)[nH]ccc4
296	ind_1,266611315	-43.848	C1CCCCC1NC(=O)c([nH]c(c23)cccc3)c2-c4cc(N)nn4C
297	ind_1,303923385	-38.387	C1CCCCC1NC(=O)c(c2O[C@H](C(C)C)C[NH3+])[nH]c(c23)cccc3
298	ind_1,482286	-43.306	c1cccc(c12)[nH]c(c2N(C(=O)C)CC)C(=O)NC3CCCCC3
299	ind_1,17986826	-45.301	C1CCCCC1NC(=O)c(c2OCC3(C[NH3+])CC3)[nH]c(c24)cccc4
300	ind_1,303923385	-36.991	C1CCCCC1NC(=O)c(c2O[C@@H](C(C)C)C[NH3+])[nH]c(c23)cccc3
301	ind_1,299964534	-39.658	C1CCCCC1NC(=O)c(c2C[C@@H](O)COC)[nH]c(c23)cccc3
302	ind_1,43618162	-37.904	C1CCCCC1NC(=O)c(c2NC[C@H](C)CO)[nH]c(c23)cccc3
303	ind_1,511198	-43.591	C1CCCCC1NC(=O)c([nH]c(c23)cccc3)c2-c4cc(=O)occ4
304	ind_1,300721385	-31.981	C1CCCCC1NC(=O)c(c2NC3(CC3)CCO)[nH]c(c24)cccc4
305	ind_1,494759	-43.679	c1cccc(c12)[nH]c(c2-c(cc3C#N)cnc3)C(=O)NC4CCCCC4
306	ind_1,313486714	-31.89	C1CCCCC1NC(=O)c([nH]c(c23)cccc3)c2OCCc4c(=O)c4
307	ind_1,106520066	-31.473	C1CCCCC1NC(=O)c(c2-c3c([O-])[nH]c(C)[nH+]3)[nH]c(c24)cccc4
308	ind_1,313728376	-36.361	C1CCCCC1NC(=O)c(c2Oc3ncco3)[nH]c(c24)cccc4
309	ind_1,43618162	-42.998	C1CCCCC1NC(=O)c(c2NC[C@@H](C)CO)[nH]c(c23)cccc3
310	ind_1,4358593	-37.689	C1CCCCC1NC(=O)c(c2-c3c(CO)[nH]cc3)[nH]c(c24)cccc4
311	ind_1,37350772	-38.632	CNC(=O)[C@@H](C)Cc1c([nH]c(c12)cccc2)C(=O)NC3CCCCC3
312	ind_1,477183	-39.858	C1CCCCC1NC(=O)c([nH]c(c23)cccc3)c2-c4cc(N)ncc4
313	ind_1,492874	-44.848	C1CCCCC1NC(=O)c(c2NC(=O)N(C)C)[nH]c(c23)cccc3
314	ind_1,299964534	-44.742	C1CCCCC1NC(=O)c(c2C[C@H](O)COC)[nH]c(c23)cccc3
315	ind_1,533170	-40.034	C1CCCCC1NC(=O)c([nH]c(c23)cccc3)c2N4CCCCC4=O
316	ind_1,300618397	-42.457	C1CCCCC1NC(=O)c(c2CC[C@H](F)C[NH3+])[nH]c(c23)cccc3
317	ind_1,2722737	-45.067	C1CCCCC1NC(=O)c([nH]c(c23)cccc3)c2OCc4ccn[nH]4
318	ind_1,2740488	-43.736	C1CCCCC1NC(=O)c(c2NC(C)(C)CCO)[nH]c(c23)cccc3
319	ind_1,32239203	-43.929	C1CCCCC1NC(=O)c(c2N(C3=O)C[C@@H](C)N3)[nH]c(c24)cccc4
320	ind_1,313574914	-42.319	C1CCCCC1NC(=O)c(c2C[C@@H](C(F)F)N)[nH]c(c23)cccc3
321	ind_1,2722737	-41.249	C1CCCCC1NC(=O)c([nH]c(c23)cccc3)c2-n4nccc4CO
322	ind_1,194829019	-39.925	C1CCCCC1NC(=O)c(c2N(C)C[C@H]3CCO3)[nH]c(c24)cccc4
323	ind_1,313574914	-32.655	C1CCCCC1NC(=O)c(c2C[C@H](C(F)F)N)[nH]c(c23)cccc3
324	ind_1,3924743	-43.034	CC(C)NC(=O)Cc1c([nH]c(c12)cccc2)C(=O)NC3CCCCC3
325	ind_1,29391722	-44.214	C1CCCCC1NC(=O)c(c2-c3c(N)occ3)[nH]c(c24)cccc4
326	ind_1,97176613	-40.205	C1CCCCC1NC(=O)c(c2Cn(c3=O)cc[nH]3)[nH]c(c24)cccc4
327	ind_1,532847	-44.691	C1CCCCC1NC(=O)c(c2N(C3=O)CCCN3)[nH]c(c24)cccc4
328	ind_1,106520066	-29.045	C1CCCCC1NC(=O)c([nH]c(c23)cccc3)c2Cc4[nH]c([O-])c[nH+]4
329	ind_1,40902021	-35.38	C1CCCCC1NC(=O)c(c2C[C@@]3(C)C[C@@H](C3)[NH3+])[nH]c(c24)cccc4
330	ind_1,53843553	-44.683	C1CCCCC1NC(=O)c([nH]c(c23)cccc3)c2CO[C@@H]4C[C@@H](C4)O
331	ind_1,881802	-18.072	C1CCCCC1NC(=O)c(c2N(C)C(=O)N(C)C)[nH]c(c23)cccc3
332	ind_1,525916	-41.9	C1CCCCC1NC(=O)c(c2-c3cnco3)[nH]c(c24)cccc4
333	ind_1,46014652	-45.054	C1CCCCC1NC(=O)c(c2N3C[C@@H](C)CC3=O)[nH]c(c24)cccc4
334	ind_1,44689002	-44.738	C1CCCCC1NC(=O)c([nH]c(c23)cccc3)c2-c4cc(N)cn4C
335	ind_1,29391722	-35.918	C1CCCCC1NC(=O)c(c2-c3ccc(o3)N)[nH]c(c24)cccc4
336	ind_1,537499	-33.142	c1cccc(c12)[nH]c(c2N(C(=O)C)C(=O)C)C(=O)NC3CCCCC3
337	ind_1,300129592	-11.305	c1cccc(c12)[nH]c(c2N[C@](C)(CC)CO)C(=O)NC3CCCCC3
338	ind_1,4358593	-40.932	C1CCCCC1NC(=O)c(c2-c3cc(CO)[nH]c3)[nH]c(c24)cccc4
339	ind_1,491019	-45.48	C1CCCCC1NC(=O)c(c2C[C@H](CC)C[NH3+])[nH]c(c23)cccc3
340	ind_1,881802	-41.596	C1CCCCC1NC(=O)c(c2CNC(=O)N(C)C)[nH]c(c23)cccc3
341	ind_1,49862210	-43.085	C1CCCCC1NC(=O)c(c2O[C@H](C)C[NH+](C)C)[nH]c(c23)cccc3
342	ind_1,300129592	-37.372	c1cccc(c12)[nH]c(c2N[C@@](C)(CC)CO)C(=O)NC3CCCCC3
343	ind_1,89944458	-44.217	C1CCCCC1NC(=O)c(c2N3[C@@H](C)CCC3=O)[nH]c(c24)cccc4
344	ind_1,301201546	-44.564	C1CCCCC1NC(=O)c(c2CC3(CO)C[NH2+]C3)[nH]c(c24)cccc4
345	ind_1,49862210	-43.86	C1CCCCC1NC(=O)c(c2O[C@@H](C)C[NH+](C)C)[nH]c(c23)cccc3
346	ind_1,539088	-43.68	C1CCCCC1NC(=O)c(c2Cc3cc(no3)O)[nH]c(c24)cccc4
347	ind_1,11488405	-41.746	C1CCCCC1NC(=O)c(c2COC(C)(C)C[NH3+])[nH]c(c23)cccc3
348	ind_1,495173	-32.879	c1cccc(c12)[nH]c(c2N(C)C(=O)CC)C(=O)NC3CCCCC3
349	ind_1,525916	-41.377	C1CCCCC1NC(=O)c(c2-c3cocn3)[nH]c(c24)cccc4
350	ind_1,97176613	-42.405	C1CCCCC1NC(=O)c(c2-c3cn(C)c(=O)[nH]3)[nH]c(c24)cccc4
351	ind_1,45774173	-35.42	C1CCCCC1NC(=O)c(c2C[C@@]3(F)C[C@@H](C3)[NH3+])[nH]c(c24)cccc4
352	ind_1,168893632	-45.196	C1CCCCC1NC(=O)c(c2N3CC[C@H](F)C3=O)[nH]c(c24)cccc4
353	ind_1,46306641	-34.771	C1CCCCC1NC(=O)c(c2N(C)c3cc[nH]n3)[nH]c(c24)cccc4
354	ind_1,194494400	-40.218	C1CCCCC1NC(=O)c(c2[C@H](O3)C(=O)C=C3C)[nH]c(c24)cccc4
355	ind_1,194494400	-40.413	C1CCCCC1NC(=O)c(c2[C@@H](O3)C(=O)C=C3C)[nH]c(c24)cccc4
356	ind_1,27335838	-39.643	C1CC1(C#N)COc2c([nH]c(c23)cccc3)C(=O)NC4CCCCC4
357	ind_1,44826305	-42.225	C1CCCCC1NC(=O)c(c2-c3cn(C)nn3)[nH]c(c24)cccc4
358	ind_1,891553	-35.01	C1CCCCC1NC(=O)c(c2-c3ncn(n3)C)[nH]c(c24)cccc4
359	ind_1,44474418	-31.016	C1CCCCC1NC(=O)c(c2-c3c(c[nH]n3)OC)[nH]c(c24)cccc4
360	ind_1,31505905	-43.039	C1CCCCC1NC(=O)c([nH]c(c23)cccc3)c2OCC4COC4
361	ind_1,44826305	-35.265	C1CCCCC1NC(=O)c([nH]c(c23)cccc3)c2-c4cnnn4C
362	ind_1,300504273	17.489	C1CCCCC1NC(=O)c(c2N[C@@H](CO)C3CC3)[nH]c(c24)cccc4
363	ind_1,300491492	-45.046	C1CCCCC1NC(=O)c([nH]c(c23)cccc3)c2NC[C@H]4C[C@@H](C4)O
364	ind_1,301257773	-42.169	C1CCCCC1NC(=O)c(c2-c3cnccn3)[nH]c(c24)cccc4
365	ind_1,194494400	-43.746	C1CCCCC1NC(=O)c(c2C3=C(C)OCC3=O)[nH]c(c24)cccc4
366	ind_1,521853	-34.103	C1CCCCC1NC(=O)c([nH]c(c23)cccc3)c2-c4c([O-])c[nH+]cc4
367	ind_1,46014652	-36.916	C1CCCCC1NC(=O)c(c2N3C[C@H](C)CC3=O)[nH]c(c24)cccc4
368	ind_1,715188	-45.217	C1CCCCC1NC(=O)c(c2CN(C3=O)CCN3)[nH]c(c24)cccc4
369	ind_1,41013466	-37.464	C1CCCCC1NC(=O)c([nH]c(c23)cccc3)c2Cn(c4)ncc4O
370	ind_1,29542286	-42.885	C1CCCCC1NC(=O)c(c2N(C3)CC3CO)[nH]c(c24)cccc4
371	ind_1,50075000	-41.584	C1CCCCC1NC(=O)c(c2-c3c(C)[nH]c(c3)N)[nH]c(c24)cccc4
372	ind_1,718825	-38.53	c1cccc(c12)[nH]c(c2-c(c[nH]3)cc3C#N)C(=O)NC4CCCCC4
373	ind_1,26943168	-45.177	C1CCCCC1NC(=O)c([nH]c(c23)cccc3)c2N[C@H]4CCOC4
374	ind_1,26943168	-20.309	C1CCCCC1NC(=O)c([nH]c(c23)cccc3)c2N[C@@H]4CCOC4
375	ind_1,491019	-44.035	C1CCCCC1NC(=O)c(c2C[C@@H](CC)C[NH3+])[nH]c(c23)cccc3
376	ind_1,43451322	-37.242	C1CCCCC1NC(=O)c(c2-c3c(F)c[nH]n3)[nH]c(c24)cccc4
377	ind_1,36835163	-40.187	C1CCCCC1NC(=O)c(c2-c(c3CO)[nH]cc3)[nH]c(c24)cccc4
378	ind_1,487473	-43.104	C1CCCCC1NC(=O)c(c2-c(c3CO)coc3)[nH]c(c24)cccc4
379	ind_1,494098	-37.389	C1CCCCC1NC(=O)c(c2CC3(CO)COC3)[nH]c(c24)cccc4
380	ind_1,13335879	-41.931	C1CCC1(C#N)Nc2c([nH]c(c23)cccc3)C(=O)NC4CCCCC4
381	ind_1,300625067	-44.339	C1CCCCC1NC(=O)c([nH]c(c23)cccc3)c2N4CC[C@H]4CO
382	ind_1,592198	-39.197	C1CCCCC1NC(=O)c(c2-c3c(C)n[nH]c3)[nH]c(c24)cccc4
383	ind_1,89942934	-39.351	C1CCCCC1NC(=O)c(c2NC[C@H]3CCO3)[nH]c(c24)cccc4
384	ind_1,44750322	-39.769	c1cccc(c12)[nH]c(c2NC(C)(C)[C@H](C)O)C(=O)NC3CCCCC3
385	ind_1,531205	-28.632	C1CCCCC1NC(=O)c(c2-c3ccn[nH]3)[nH]c(c24)cccc4
386	ind_1,64093050	-43.36	C1CCCCC1NC(=O)c(c2C3=CC(=O)N(C)C3)[nH]c(c24)cccc4
387	ind_1,514577	-42.793	C1CCCCC1NC(=O)c(c2-c3ncc[nH]3)[nH]c(c24)cccc4
388	ind_1,289954427	-42.108	C1CCCCC1NC(=O)c(c2OC3=NCC3)[nH]c(c24)cccc4
389	ind_1,44689002	-41.581	C1CCCCC1NC(=O)c([nH]c(c23)cccc3)c2-c4c(N)ccn4C
390	ind_1,300049678	-44.391	C1CCCCC1NC(=O)c([nH]c(c23)cccc3)c2C[C@@H]4CCC[NH2+]4
391	ind_1,265081377	-40.339	C1CCCCC1NC(=O)c(c2C3=CC(=O)[C@@H](O3)C)[nH]c(c24)cccc4
392	ind_1,36553249	-18.576	C1CCCCC1NC(=O)c(c2CC3(C[NH3+])CCC3)[nH]c(c24)cccc4
393	ind_1,53752591	-41.345	C1CCCCC1NC(=O)c(c2-c(n[nH]3)nc3CC)[nH]c(c24)cccc4
394	ind_1,93429663	-43.562	C1CCCCC1NC(=O)c(c2-c(c3C)ocn3)[nH]c(c24)cccc4
395	ind_1,12601277	-44.144	C1CCCCC1NC(=O)c([nH]c(c23)cccc3)c2N(C4)CC[C@@H]4OC
396	ind_1,718825	-39.56	c1cccc(c12)[nH]c(c2-c(c3C#N)cc[nH]3)C(=O)NC4CCCCC4
397	ind_1,41557356	-28.525	C1CCCCC1NC(=O)c(c2C[C@]3(N)C[N@H+](C)C3)[nH]c(c24)cccc4
398	ind_1,44827487	-45.495	C1CCCCC1NC(=O)c([nH]c(c23)cccc3)c2-c4nncn4C
399	ind_1,106520066	-37.843	C1CCCCC1NC(=O)c(c2Oc(c[nH]3)nc3C)[nH]c(c24)cccc4
400	ind_1,41013466	-32.706	C1CCCCC1NC(=O)c(c2-c3c(O)cn(n3)C)[nH]c(c24)cccc4
401	ind_1,300715418	-44.192	C1CCCCC1NC(=O)c(c2N(C)c3cnco3)[nH]c(c24)cccc4
402	ind_1,39587889	-42.261	C1CCCCC1NC(=O)c(c2-c3c(NC)noc3)[nH]c(c24)cccc4
403	ind_1,491019	-36.877	C1CCCCC1NC(=O)c(c2CC[C@@H](C)C[NH3+])[nH]c(c23)cccc3
404	ind_1,300068773	-42.587	C1CCCCC1NC(=O)c(c2OC3C[NH2+]C3)[nH]c(c24)cccc4
405	ind_1,491019	-41.824	C1CCCCC1NC(=O)c(c2CC[C@H](C)C[NH3+])[nH]c(c23)cccc3
406	ind_1,525916	-40.87	C1CCCCC1NC(=O)c(c2-c3ncco3)[nH]c(c24)cccc4
407	ind_1,89942584	-43.294	C1CCCCC1NC(=O)c([nH]c(c23)cccc3)c2C[C@]4(F)CC[NH2+]C4
408	ind_1,487473	-29.82	C1CCCCC1NC(=O)c(c2-c(c3CO)occ3)[nH]c(c24)cccc4
409	ind_1,300715418	-40.065	C1CCCCC1NC(=O)c(c2-c3c(NC)ocn3)[nH]c(c24)cccc4
410	ind_1,511198	-43.763	C1CCCCC1NC(=O)c([nH]c(c23)cccc3)c2-c4c(=O)occc4
411	ind_1,50075000	-39.307	C1CCCCC1NC(=O)c([nH]c(c23)cccc3)c2Cc4ccc(N)[nH]4
412	ind_1,713748	-40.672	c1cccc(c12)[nH]c(c2-c(c3C#N)coc3)C(=O)NC4CCCCC4
413	ind_1,728153	-34.691	C1CCCCC1NC(=O)c(c2-c3ncccn3)[nH]c(c24)cccc4
414	ind_1,4358593	-39.138	C1CCCCC1NC(=O)c([nH]c(c23)cccc3)c2-c([nH]4)ccc4CO
415	ind_1,494754	-41.91	c1cccc(c12)[nH]c(c2-c(ccn3)cc3C#N)C(=O)NC4CCCCC4
416	ind_1,300625067	-17.561	C1CCCCC1NC(=O)c([nH]c(c23)cccc3)c2N4CC[C@@H]4CO
417	ind_1,28288680	-45.409	C1CCCCC1NC(=O)c(c2-c3c(C)oc(c3)N)[nH]c(c24)cccc4
418	ind_1,6885230	-39.912	C1CCCCC1NC(=O)c(c2C[C@H](C)CO)[nH]c(c23)cccc3
419	ind_1,46306641	-41.829	C1CCCCC1NC(=O)c(c2-c3cc(NC)n[nH]3)[nH]c(c24)cccc4
420	ind_1,4326338	-45.172	c1cccc(c12)[nH]c(c2-c([nH]c3)cc3C#N)C(=O)NC4CCCCC4
421	ind_1,41557356	-39.198	C1CCCCC1NC(=O)c(c2C[C@@]3(N)C[N@H+](C)C3)[nH]c(c24)cccc4
422	ind_1,39754297	-44.046	C1CCCCC1NC(=O)c([nH]c(c23)cccc3)c2C[C@@]4(O)CCOC4
423	ind_1,484146	-41.577	c1cccc(c12)[nH]c(c2-c(c3C#N)cco3)C(=O)NC4CCCCC4
424	GR-14	-52.315	C1CCCCC1NC(=O)c(c2C[NH2+]CC=C)[nH]c(c23)cccc3
425	ind_1,3763299	-44.768	C1CCCCC1NC(=O)c(c2Oc(n[nH]3)cc3C)[nH]c(c24)cccc4
426	ind_1,300507601	-44.857	C1CC1(C#N)CNc2c([nH]c(c23)cccc3)C(=O)NC4CCCCC4
427	ind_1,486394	-45.216	C1CCCCC1NC(=O)c(c2N[C@@H](C(C)C)CO)[nH]c(c23)cccc3
428	ind_1,49838971	-42.792	N#C[C@H]1CCN1c2c([nH]c(c23)cccc3)C(=O)NC4CCCCC4
429	ind_1,4326338	-41.406	c1cccc(c12)[nH]c(c2-c(c3C#N)[nH]cc3)C(=O)NC4CCCCC4
430	ind_1,25685652	-32.127	c1cccc(c12)[nH]c(c2CC(C)(C)[C@@H](C)[NH3+])C(=O)NC3CCCCC3
431	ind_1,44456517	-42.288	C1CCCCC1NC(=O)c([nH]c(c23)cccc3)c2NCCC4COC4
432	ind_1,6237769	-33.198	C1CC1C(=O)N(C)c2c([nH]c(c23)cccc3)C(=O)NC4CCCCC4
433	ind_1,28288688	-35.317	C1CCCCC1NC(=O)c([nH]c(c23)cccc3)c2Cc4cc(N)oc4
434	ind_1,300615913	-40.92	C1CCCCC1NC(=O)c(c2NC3(CC)COC3)[nH]c(c24)cccc4
435	ind_1,6885230	-44.333	C1CCCCC1NC(=O)c(c2C[C@@H](C)CO)[nH]c(c23)cccc3
436	ind_1,44690022	-42.359	C1CCCCC1NC(=O)c(c2-c3cnc(o3)C)[nH]c(c24)cccc4
437	ind_1,504152	-41.635	C1CCCCC1NC(=O)c(c2N[C@@H](C)C[NH+](C)C)[nH]c(c23)cccc3
438	ind_1,56973437	-38.502	C1CCCCC1NC(=O)c([nH]c(c23)cccc3)c2N4CC[C@]4(C)CO
439	ind_1,39587889	-37.31	C1CCCCC1NC(=O)c(c2-c3cc(no3)NC)[nH]c(c24)cccc4
440	ind_1,64093050	-41.644	C1CCCCC1NC(=O)c(c2C3=CCN(C)C3=O)[nH]c(c24)cccc4
441	ind_1,44297249	-39.458	C1CCCCC1NC(=O)c(c2N(C)c3ncco3)[nH]c(c24)cccc4
442	ind_1,592198	-43.333	C1CCCCC1NC(=O)c(c2Cc3cc[nH]n3)[nH]c(c24)cccc4
443	ind_1,45978243	-41.346	C1CCCCC1NC(=O)c(c2Oc(on3)cc3C)[nH]c(c24)cccc4
444	ind_1,41557356	-41.333	C1CCCCC1NC(=O)c(c2C[N@H+](C3)C[C@@]3(C)N)[nH]c(c24)cccc4
445	ind_1,24757104	19.316	C1CCCCC1NC(=O)c(c2-n3nccc3[O-])[nH]c(c24)cccc4
446	ind_1,25685792	-34.894	C1CCCCC1NC(=O)c(c2C[C@H]([NH3+])C(C)C)[nH]c(c23)cccc3
447	ind_1,50870929	-38.812	C1CCCCC1NC(=O)c(c2-c3c(OC)n[nH]c3)[nH]c(c24)cccc4
448	ind_1,39587889	-37.376	C1CCCCC1NC(=O)c(c2N(C)c3ccon3)[nH]c(c24)cccc4
449	ind_1,28288688	-42.202	C1CCCCC1NC(=O)c(c2-c(c3C)oc(c3)N)[nH]c(c24)cccc4
450	ind_1,6871865	-27.155	C1CCCCC1NC(=O)c(c2-c(c3C)nc[nH]3)[nH]c(c24)cccc4
451	ind_1,521853	-38.467	C1CCCCC1NC(=O)c([nH]c(c23)cccc3)c2-c4ccc([O-])c[nH+]4
452	ind_1,6884959	-43.523	C1CCCCC1NC(=O)c(c2CCCCO)[nH]c(c23)cccc3
453	ind_1,486394	-43.108	C1CCCCC1NC(=O)c(c2N[C@H](C(C)C)CO)[nH]c(c23)cccc3
454	ind_1,11472453	-32.875	C1CCCCC1NC(=O)c(c2CC(F)(F)CO)[nH]c(c23)cccc3
455	ind_1,713748	-40.008	c1cccc(c12)[nH]c(c2-c(c3C#N)occ3)C(=O)NC4CCCCC4
456	ind_1,56973437	-35.789	C1CCCCC1NC(=O)c([nH]c(c23)cccc3)c2N4CC[C@@]4(C)CO
457	ind_1,494754	-45.289	c1cccc(c12)[nH]c(c2-c(c3C#N)cccn3)C(=O)NC4CCCCC4
458	ind_1,484146	-42.235	N#Cc1ccc(o1)-c2c([nH]c(c23)cccc3)C(=O)NC4CCCCC4
459	ind_1,37350772	-25.214	c1cccc(c12)[nH]c(c2N(C)C(=O)C(C)C)C(=O)NC3CCCCC3
460	ind_1,193228525	-28.931	C1CCCCC1NC(=O)c(c2N3CCC[C@@H]3F)[nH]c(c24)cccc4
461	ind_1,495757	-44.289	C1CCCCC1NC(=O)c(c2-c(c3C)nncc3)[nH]c(c24)cccc4
462	ind_1,715188	-43.065	C1CCCCC1NC(=O)c(c2N3CCN(C)C3=O)[nH]c(c24)cccc4
463	ind_1,500492	-40.878	C1CCCCC1NC(=O)c(c2N(C)C(C)C)[nH]c(c23)cccc3
464	ind_1,43011901	-33.712	c1cccc(c12)[nH]c(c2C[C@@](C)(CO)OC)C(=O)NC3CCCCC3
465	ind_1,17986826	-42.327	C1CCCCC1NC(=O)c(c2NCC3(CO)CC3)[nH]c(c24)cccc4
466	ind_1,44690022	-40.584	C1CCCCC1NC(=O)c(c2-c3coc(n3)C)[nH]c(c24)cccc4
467	ind_1,487703	-44.538	C1CCCCC1NC(=O)c([nH]c(c23)cccc3)c2OC4CCOCC4
468	ind_1,43550310	-39.535	C1CCCCC1NC(=O)c(c2C[C@](F)(C)CO)[nH]c(c23)cccc3
469	ind_1,43451322	-37.235	C1CCCCC1NC(=O)c(c2-c3c(F)cn[nH]3)[nH]c(c24)cccc4
470	ind_1,114324614	-37.889	C1CCCCC1NC(=O)c(c2-c3n(C)c([O-])c[nH+]3)[nH]c(c24)cccc4
471	ind_1,299964534	-43.336	C1CCCCC1NC(=O)c(c2O[C@@H](C)COC)[nH]c(c23)cccc3
472	ind_1,721016	-40.523	C1CCCCC1NC(=O)c([nH]c(c23)cccc3)c2Cn4nccc4N
473	ind_1,1972048	-43.159	C1CCCCC1NC(=O)c(c2-c3c(C)onc3)[nH]c(c24)cccc4
474	ind_1,481804	-34.279	c1cccc(c12)[nH]c(c2NC(=O)CC)C(=O)NC3CCCCC3
475	ind_1,39280610	-14.944	c1cccc(c12)[nH]c(c2C[C@](C)(CC)C[NH3+])C(=O)NC3CCCCC3
476	ind_1,44471171	-44.73	C1CCCCC1NC(=O)c([nH]c(c23)cccc3)c2Nc4cc[nH]c4
477	ind_1,64093048	-40.098	C1CCCCC1NC(=O)c(c2-n(n3)cc(O)c3C)[nH]c(c24)cccc4
478	GR-20	-40.44	C1CCCCC1NC(=O)c(c2C[NH2+]C(C)C)[nH]c(c23)cccc3
479	ind_1,114324614	-36.413	C1CCCCC1NC(=O)c([nH]c(c23)cccc3)c2Cn4c[nH+]cc4[O-]
480	ind_1,889864	-33.752	c1cccc(c12)[nH]c(c2NCC(C)(C)CO)C(=O)NC3CCCCC3
481	ind_1,43214446	-35.819	C1CCCCC1NC(=O)c([nH]c(c23)cccc3)c2OCCC4COC4
482	ind_1,42180167	-23.763	C1CCCCC1NC(=O)c([nH]c(c23)cccc3)c2C[NH2+]CC4COC4
483	ind_1,89942722	-43.67	C1CCCCC1NC(=O)c([nH]c(c23)cccc3)c2C[C@H](O)C4COC4
484	ind_1,40295153	-41.528	C1CCCCC1NC(=O)c(c2-c3c(C)noc3)[nH]c(c24)cccc4
485	ind_1,504679	-30.095	C1CCCCC1NC(=O)c(c2C[N@H+](C)CC)[nH]c(c23)cccc3
486	ind_1,36726021	-41.814	C1CCCCC1NC(=O)c(c2C[C@@H](C(C)C)C[NH3+])[nH]c(c23)cccc3
487	ind_1,838034	-45.269	C1CCCCC1NC(=O)c(c2-c3c(Cl)c[nH]n3)[nH]c(c24)cccc4
488	ind_1,40902155	-29.806	C1CCCCC1NC(=O)c([nH]c(c23)cccc3)c2N[C@@]4(C)CCOC4
489	ind_1,275047307	-34.622	C1CCCCC1NC(=O)c([nH]c(c23)cccc3)c2Oc4cc[nH]c4
490	ind_1,494754	-45.137	N#Cc1cccc(n1)-c2c([nH]c(c23)cccc3)C(=O)NC4CCCCC4
491	ind_1,44845864	-38.94	C1CCCCC1NC(=O)c(c2C[C@@H]3C[C@@H](C3)O)[nH]c(c24)cccc4
492	ind_1,514577	-40.413	C1CCCCC1NC(=O)c(c2-n3ccnc3)[nH]c(c24)cccc4
493	ind_1,490752	-45.154	C1CCCCC1NC(=O)c(c2CC3(CO)CC3)[nH]c(c24)cccc4
494	ind_1,489528	-43.646	C1CCCCC1NC(=O)c(c2-c(c3C)[nH]nc3)[nH]c(c24)cccc4
495	ind_1,89936468	-45.235	N#C[C@@H]1C[C@@H](C1)Nc2c([nH]c(c23)cccc3)C(=O)NC4CCCCC4
496	ind_1,49638575	-45.342	C1CCCCC1NC(=O)c(c2NC[C@@H](C)[NH+](C)C)[nH]c(c23)cccc3
497	ind_1,44845864	-38.995	C1CCCCC1NC(=O)c(c2C[C@H]3C[C@@H](C3)O)[nH]c(c24)cccc4
498	ind_1,915666	-40.015	c1cccc(c12)[nH]c(c2NC(=O)C(F)F)C(=O)NC3CCCCC3
499	ind_1,36087356	-43.862	c1cccc(c12)[nH]c(c2N(C)CC(C)(C)O)C(=O)NC3CCCCC3
500	ind_1,494759	-39.114	c1cccc(c12)[nH]c(c2-c(c3C#N)nccc3)C(=O)NC4CCCCC4
501	ind_1,97176676	-36.236	C1CCCCC1NC(=O)c(c2Oc3cn(C)cn3)[nH]c(c24)cccc4
502	ind_1,233172950	-30.659	C1CCCCC1NC(=O)c(c2C[C@@]3(C)[C@@H](C3)O)[nH]c(c24)cccc4
503	ind_1,20755438	-43.436	C1CCCCC1NC(=O)c([nH]c(c23)cccc3)c2O[C@H]4CCCOC4
504	ind_1,96462825	-41.875	C1CCCCC1NC(=O)c([nH]c(c23)cccc3)c2CC[C@@H]([NH3+])C4CC4
505	ind_1,49839942	-36.658	C1CCCCC1NC(=O)c(c2OC[C@]3(C)CCO3)[nH]c(c24)cccc4
506	ind_1,476050	-41.552	C1CCCCC1NC(=O)c([nH]c(c23)cccc3)c2-c4c(C)n[nH]c4C
507	ind_1,505957	-33.113	c1cccc(c12)[nH]c(c2CC(C)(C)CO)C(=O)NC3CCCCC3
508	ind_1,49839936	-41.42	C1CCCCC1NC(=O)c(c2C[C@H]3CCO3)[nH]c(c24)cccc4
509	ind_1,89942722	-40.424	C1CCCCC1NC(=O)c([nH]c(c23)cccc3)c2C[C@@H](O)C4COC4
510	ind_1,4357356	-37.184	C1CCCCC1NC(=O)c(c2-c(c3C)onc3)[nH]c(c24)cccc4
511	ind_1,4357356	-44.264	C1CCCCC1NC(=O)c(c2-c(c3C)noc3)[nH]c(c24)cccc4
512	ind_1,3924743	8.049	c1cccc(c12)[nH]c(c2N(C(=O)C)C(C)C)C(=O)NC3CCCCC3
513	ind_1,1972048	-41.743	C1CCCCC1NC(=O)c(c2Cc3ccno3)[nH]c(c24)cccc4
514	ind_1,265081213	-39.768	c1cccc(c12)[nH]c(c2C[C@@H](C(=O)F)C)C(=O)NC3CCCCC3
515	ind_1,49253459	-41.301	C1CCCCC1NC(=O)c(c2Cc3cn(C)nn3)[nH]c(c24)cccc4
516	ind_1,28145178	-33.888	C1CCCCC1NC(=O)c([nH]c(c23)cccc3)c2NCC4(C)COC4
517	ind_1,521853	-37.287	C1CCCCC1NC(=O)c([nH]c(c23)cccc3)c2-c4c([O-])ccc[nH+]4
518	ind_1,49781622	-31.649	C1CCCCC1NC(=O)c([nH]c(c23)cccc3)c2-n4cccc4N
519	ind_1,93429663	-45.164	C1CCCCC1NC(=O)c(c2-c(n3)occ3C)[nH]c(c24)cccc4
520	ind_1,44473107	-7.146	C1CCCCC1NC(=O)c(c2OC3(CC)COC3)[nH]c(c24)cccc4
521	ind_1,299974782	-24.364	C1CCCCC1NC(=O)c(c2N(C3)CC[C@@H]3F)[nH]c(c24)cccc4
522	ind_1,30423578	-34.842	C1CCCCC1NC(=O)c([nH]c(c23)cccc3)c2CC[C@H]4CC[NH2+]C4
523	ind_1,300049678	-2.225	C1CCCCC1NC(=O)c([nH]c(c23)cccc3)c2N4CCC[C@H]4C
524	ind_1,96388422	-40.135	C1CCCCC1NC(=O)c(c2N(C)C3(C)CC3)[nH]c(c24)cccc4
525	ind_1,107141179	-43.837	C1CCCCC1NC(=O)c(c2-c3c(Cl)onc3)[nH]c(c24)cccc4
526	ind_1,300432995	-41.794	C1CCCCC1NC(=O)c(c2C[C@@H](C)C(C)(C)[NH3+])[nH]c(c23)cccc3
527	ind_1,6745905	-36.351	C1CCCCC1NC(=O)c([nH]c(c23)cccc3)c2-n4c(C)nnc4C
528	ind_1,49253459	-28.861	C1CCCCC1NC(=O)c(c2Cn(nn3)cc3C)[nH]c(c24)cccc4
529	ind_1,31409013	-44.495	C1CCCCC1NC(=O)c([nH]c(c23)cccc3)c2Cn4cnnc4C
530	ind_1,300632615	-44.647	C1CCCCC1NC(=O)c([nH]c(c23)cccc3)c2NCC4C[NH2+]C4
531	ind_1,300474033	-42.299	C1CCCCC1NC(=O)c(c2N(C)CC(F)F)[nH]c(c23)cccc3
532	ind_1,36726021	-12.032	C1CCCCC1NC(=O)c(c2C[C@H](C(C)C)C[NH3+])[nH]c(c23)cccc3
533	ind_1,300463969	-18.326	C1CCCCC1NC(=O)c(c2N(C)C3CCC3)[nH]c(c24)cccc4
534	ind_1,53989943	-38.832	C1CCCCC1NC(=O)c([nH]c(c23)cccc3)c2-c4c[nH]c(n4)OC
535	ind_1,2727334	-42.177	C1CCCCC1NC(=O)c([nH]c(c23)cccc3)c2-c4ncnn4CC
536	ind_1,114324614	-33.774	C1CCCCC1NC(=O)c(c2-c3c([O-])n(C)c[nH+]3)[nH]c(c24)cccc4
537	ind_1,2727334	-42.192	C1CCCCC1NC(=O)c([nH]c(c23)cccc3)c2-c4ncn(n4)CC
538	ind_1,96387665	-30.35	C1CCCCC1NC(=O)c(c2C[C@@H](CC)[NH2+]C)[nH]c(c23)cccc3
539	ind_1,53989945	-43.341	C1CCCCC1NC(=O)c([nH]c(c23)cccc3)c2COc4c[nH]cn4
540	ind_1,75509457	-45.495	C1CCCCC1NC(=O)c(c2C[C@@]3(C)[C@H](O)CC3)[nH]c(c24)cccc4
541	ind_1,75509457	-19.292	C1CCCCC1NC(=O)c(c2C[C@@]3(C)[C@@H](O)CC3)[nH]c(c24)cccc4
542	ind_1,300548931	-27.97	C1CCCCC1NC(=O)c(c2N[C@H](C)COC)[nH]c(c23)cccc3
543	ind_1,302585703	-37.352	C1CCCCC1NC(=O)c([nH]c(c23)cccc3)c2N4CC[C@@H]4CCO
544	ind_1,40295153	-45.123	C1CCCCC1NC(=O)c(c2Cc3ccon3)[nH]c(c24)cccc4
545	ind_1,53989943	-39.289	C1CCCCC1NC(=O)c([nH]c(c23)cccc3)c2-c4cnc([nH]4)OC
546	ind_1,114324581	-38.264	C1CCCCC1NC(=O)c([nH]c(c23)cccc3)c2-c4nncn4CC
547	GR-21	-59.658	C1CCCCC1NC(=O)c(c2C[NH2+]C(C)(C)C)[nH]c(c23)cccc3
548	ind_1,301221422	-44.509	C1CCCCC1NC(=O)c(c2C[C@@H](C)C[C@@H](C)[NH3+])[nH]c(c23)cccc3
549	ind_1,53752591	-39.264	C1CCCCC1NC(=O)c([nH]c(c23)cccc3)c2-n4cnnc4CC
550	ind_1,592196	-43.981	C1CCCCC1NC(=O)c([nH]c(c23)cccc3)c2-c(n4)cncc4C
551	ind_1,1972048	-44.511	C1CCCCC1NC(=O)c(c2-c(no3)cc3C)[nH]c(c24)cccc4
552	ind_1,49839936	-45.109	C1CCCCC1NC(=O)c(c2C[C@@H]3CCO3)[nH]c(c24)cccc4
553	ind_1,11482901	-39.104	C1CCCCC1NC(=O)c([nH]c(c23)cccc3)c2NC[C@@H]4CCOC4
554	ind_1,44465907	-41.618	C1CCCCC1NC(=O)c(c2N[C@H](C3)C[C@@]3(C)O)[nH]c(c24)cccc4
555	ind_1,42804276	-41.528	C1CCCCC1NC(=O)c([nH]c(c23)cccc3)c2-c4cnnn4CC
556	ind_1,838034	-42.54	C1CCCCC1NC(=O)c(c2-c3c(Cl)cn[nH]3)[nH]c(c24)cccc4
557	ind_1,40295153	-43.015	C1CCCCC1NC(=O)c(c2-c(on3)cc3C)[nH]c(c24)cccc4
558	ind_1,49269177	-41.606	C1CCCCC1NC(=O)c(c2C[C@H](C(F)F)O)[nH]c(c23)cccc3
559	ind_1,2800665	-43.377	C1CCCCC1NC(=O)c([nH]c(c23)cccc3)c2OC[C@@H]4CCCO4
560	ind_1,49269177	-41.171	C1CCCCC1NC(=O)c(c2C[C@@H](C(F)F)O)[nH]c(c23)cccc3
561	ind_1,49823427	-34.973	C1CCCCC1NC(=O)c([nH]c(c23)cccc3)c2-c4ccncc4
562	ind_1,49823427	-45.486	C1CCCCC1NC(=O)c([nH]c(c23)cccc3)c2-c4cccnc4
563	ind_1,313607647	-39.203	C1CCCCC1NC(=O)c([nH]c(c23)cccc3)c2NCCC4(O)CC4
564	ind_1,24201972	-43.83	C1CCCCC1NC(=O)c([nH]c(c23)cccc3)c2NCC4(O)CCC4
565	ind_1,36551430	-41.311	C1CCCCC1NC(=O)c(c2-c(c3CC)n[nH]c3)[nH]c(c24)cccc4
566	ind_1,64092061	-34.787	C1CCCCC1NC(=O)c(c2-c3c(Cl)cno3)[nH]c(c24)cccc4
567	ind_1,33509449	-29.686	C1CCCCC1NC(=O)c(c2C[C@]3(C)C[C@@H](C3)O)[nH]c(c24)cccc4
568	ind_1,89942722	-42.235	C1CCCCC1NC(=O)c([nH]c(c23)cccc3)c2O[C@H](C)C4COC4
569	ind_1,96388285	-19.766	C1CCCCC1NC(=O)c(c2N(C)C[C@@H](F)C)[nH]c(c23)cccc3
570	ind_1,265081213	-40.809	c1cccc(c12)[nH]c(c2C[C@H](C(=O)F)C)C(=O)NC3CCCCC3
571	ind_1,42852325	-41.752	C1CCCCC1NC(=O)c(c2N(CC)CC)[nH]c(c23)cccc3
572	ind_1,37994392	-43.155	C\C=C(\N)OCc1c([nH]c(c12)cccc2)C(=O)NC3CCCCC3
573	ind_1,53989943	-45.401	C1CCCCC1NC(=O)c([nH]c(c23)cccc3)c2COc4ncc[nH]4
574	ind_1,44690158	-42.115	C1CCCCC1NC(=O)c(c2-c3cc(O)n(n3)C)[nH]c(c24)cccc4
575	ind_1,95734998	-41.395	C1CCCCC1NC(=O)c([nH]c(c23)cccc3)c2OCC[C@@H]4CCO4
576	ind_1,193255295	-43.332	C1CCCCC1NC(=O)c([nH]c(c23)cccc3)c2N4CCCC[C@H]4F
577	ind_1,96388285	-41.247	C1CCCCC1NC(=O)c(c2N(C)C[C@H](F)C)[nH]c(c23)cccc3
578	ind_1,193230464	-35.44	C1CCCCC1NC(=O)c([nH]c(c23)cccc3)c2CN4CCC[C@H]4F
579	ind_1,97176613	-41.014	C1CCCCC1NC(=O)c([nH]c(c23)cccc3)c2Oc4nccn4C
580	ind_1,193255295	-39.846	C1CCCCC1NC(=O)c([nH]c(c23)cccc3)c2N4CCCC[C@@H]4F
581	ind_1,33509449	-41.495	C1CCCCC1NC(=O)c(c2C[C@@]3(C)C[C@@H](C3)O)[nH]c(c24)cccc4
582	ind_1,486095	-44.302	C1CCCCC1NC(=O)c([nH]c(c23)cccc3)c2NC[C@@H]4CCCO4
583	ind_1,301184707	-44.916	C1CCCCC1NC(=O)c(c2N(C3)CC3[C@H](C)O)[nH]c(c24)cccc4
584	ind_1,494098	-42.237	C1CCCCC1NC(=O)c([nH]c(c23)cccc3)c2OCC4(C)COC4
585	ind_1,193230464	-35.877	C1CCCCC1NC(=O)c([nH]c(c23)cccc3)c2CN4CCC[C@@H]4F
586	ind_1,50158336	-38.222	C1CCCCC1NC(=O)c(c2C[C@H](CC)CO)[nH]c(c23)cccc3
587	ind_1,4326338	-41.357	N#Cc1ccn(c1)-c2c([nH]c(c23)cccc3)C(=O)NC4CCCCC4
588	ind_1,7419875	-38.775	C1CCCCC1NC(=O)c(c2CCCC(C)(C)[NH3+])[nH]c(c23)cccc3
589	ind_1,481883	-36.688	c1cccc(c12)[nH]c(c2NC(=O)C(C)C)C(=O)NC3CCCCC3
590	ind_1,76745230	-44.539	C1CCCCC1NC(=O)c([nH]c(c23)cccc3)c2Cc4c(C)[nH]nc4
591	ind_1,32176285	-41.506	c1cccc(c12)[nH]c(c2CC(C)(C)[NH2+]C)C(=O)NC3CCCCC3
592	ind_1,84834002	-44.947	C1CCCCC1NC(=O)c(c2C[C@]3(C)[C@@H](C3)CO)[nH]c(c24)cccc4
593	ind_1,39754297	-40.808	C1CCCCC1NC(=O)c([nH]c(c23)cccc3)c2O[C@@]4(C)CCOC4
594	ind_1,39754297	-27.15	C1CCCCC1NC(=O)c([nH]c(c23)cccc3)c2O[C@]4(C)CCOC4
595	ind_1,50158336	-40.873	C1CCCCC1NC(=O)c(c2CC[C@@H](C)CO)[nH]c(c23)cccc3
596	ind_1,6208953	-36.99	c1cccc(c12)[nH]c(c2N(CC)C(=O)CC)C(=O)NC3CCCCC3
597	ind_1,37196068	-35.586	CCCC(=O)N(C)c1c([nH]c(c12)cccc2)C(=O)NC3CCCCC3
598	GR-5	-40.939	C1CCC[C@H]([C@@H]1C)NC(=O)c(c2C)[nH]c(c23)cccc3
599	ind_1,53989945	-38.444	C1CCCCC1NC(=O)c(c2-c3nc(c[nH]3)OC)[nH]c(c24)cccc4
600	ind_1,476462	-45.096	C1CCCCC1NC(=O)c([nH]c(c23)cccc3)c2-c4cncn4C
601	ind_1,222568019	-37.21	C1CCCCC1NC(=O)c(c2-c(n[nH]3)c(F)c3C)[nH]c(c24)cccc4
602	ind_1,718825	-42.172	N#Cc1cccn1-c2c([nH]c(c23)cccc3)C(=O)NC4CCCCC4
603	ind_1,40897159	0.624	C1CCCCC1NC(=O)c(c2CC3(CO)CCC3)[nH]c(c24)cccc4
604	ind_1,300062428	-43.91	C1CCCCC1NC(=O)c(c2N(C3)CCC[C@@H]3F)[nH]c(c24)cccc4
605	ind_1,301221422	-43.899	C1CCCCC1NC(=O)c(c2C[C@H]([NH3+])CC(C)C)[nH]c(c23)cccc3
606	ind_1,40331672	-42.101	C1CCCCC1NC(=O)c([nH]c(c23)cccc3)c2NCc4cc[nH]c4
607	ind_1,50158336	-39.087	C1CCCCC1NC(=O)c(c2C[C@@H](CC)CO)[nH]c(c23)cccc3
608	ind_1,53993028	-38.309	C1CCCCC1NC(=O)c([nH]c(c23)cccc3)c2Oc4ccc[nH]4
609	ind_1,50870929	-37.12	C1CCCCC1NC(=O)c(c2-c3cc(n[nH]3)OC)[nH]c(c24)cccc4
610	GR-6	-42.431	C[C@H]1CC[C@H](CC1)NC(=O)c(c2C)[nH]c(c23)cccc3
611	ind_1,300625067	-41.926	C1CCCCC1NC(=O)c([nH]c(c23)cccc3)c2OC[C@@H]4CC[NH2+]4
612	ind_1,300553490	-39.128	C1CCCCC1NC(=O)c(c2N(C)[C@H]3C[N@H+](C)C3)[nH]c(c24)cccc4
613	ind_1,44840429	-15.092	C1CCCCC1NC(=O)c([nH]c(c23)cccc3)c2N[C@@H]4C[C@@H](C4)OC
614	ind_1,49180806	-37.062	C1CCCCC1NC(=O)c(c2CC3(CC3)CCO)[nH]c(c24)cccc4
615	ind_1,49839942	-44.146	C1CCCCC1NC(=O)c(c2OC[C@@]3(C)CCO3)[nH]c(c24)cccc4
616	ind_1,64093046	-39.961	C1CCCCC1NC(=O)c([nH]c(c23)cccc3)c2Oc4ccoc4
617	ind_1,95439182	-26.627	C1CCCCC1NC(=O)c(c2CC(C)(C)O)[nH]c(c23)cccc3
618	ind_1,96387665	-31.733	C1CCCCC1NC(=O)c(c2C[NH2+][C@H](C)CC)[nH]c(c23)cccc3
619	ind_1,299986529	-36.589	c1cccc(c12)[nH]c(c2\N=C(\C)OC)C(=O)NC3CCCCC3
620	ind_1,261786334	-43.624	C1CC1C(=O)Nc2c([nH]c(c23)cccc3)C(=O)NC4CCCCC4
621	ind_1,48605068	-44.087	c1cccc(c12)[nH]c(c2N[C@H](C)C(C)(C)O)C(=O)NC3CCCCC3
622	ind_1,531205	-43.792	C1CCCCC1NC(=O)c(c2-n3cccn3)[nH]c(c24)cccc4
623	ind_1,222568019	-44.712	C1CCCCC1NC(=O)c([nH]c(c23)cccc3)c2Cc4c(F)cn[nH]4
624	ind_1,10501119	-43.049	C1CCCCC1NC(=O)c([nH]c(c23)cccc3)c2C[C@H](O)C4CCC4
625	ind_1,49824095	-40.439	C1CCCCC1NC(=O)c(c2-c(c3CC)nc[nH]3)[nH]c(c24)cccc4
626	ind_1,2725829	-41.618	c1cccc(c12)[nH]c(c2C[C@@]3(C)[C@@H](C#N)C3)C(=O)NC4CCCCC4
627	ind_1,194624973	-34.016	C1CCCCC1NC(=O)c(c2N(C)[C@@H]3C[C@H](F)C3)[nH]c(c24)cccc4
628	ind_1,107847225	-41.273	C1CCCCC1NC(=O)c(c2Cc(c3C)onc3)[nH]c(c24)cccc4
629	ind_1,96093622	-4.899	C1CCCCC1NC(=O)c(c2N(C)C3(CC)CC3)[nH]c(c24)cccc4
630	ind_1,194624973	-44.727	C1CCCCC1NC(=O)c(c2N(C)[C@H]3C[C@H](F)C3)[nH]c(c24)cccc4
631	ind_1,44690158	-43.692	C1CCCCC1NC(=O)c([nH]c(c23)cccc3)c2Cn4nccc4O
632	ind_1,89936792	-43.177	C1CCCCC1NC(=O)c(c2-c3c(CC)[nH]nc3)[nH]c(c24)cccc4
633	ind_1,44152996	-15.436	C1CCCCC1NC(=O)c(c2C[C@H](CO)C3CC3)[nH]c(c24)cccc4
634	ind_1,31416273	-30.797	CC[C@](C)(O)CNc1c([nH]c(c12)cccc2)C(=O)NC3CCCCC3
635	ind_1,48885471	-43.311	C1CCCCC1NC(=O)c(c2-c3nccs3)[nH]c(c24)cccc4
636	ind_1,70145454	-44.533	c1cccc(c12)[nH]c(c2NC(=O)[C@@H](F)C)C(=O)NC3CCCCC3
637	ind_1,93432619	-43.892	C1CCCCC1NC(=O)c(c2-c(ocn3)c3CC)[nH]c(c24)cccc4
638	ind_1,44152996	-33.507	C1CCCCC1NC(=O)c(c2C[C@@H](CO)C3CC3)[nH]c(c24)cccc4
639	ind_1,6190785	-42.482	c1cccc(c12)[nH]c(c2C[C@@](C)(CC)CO)C(=O)NC3CCCCC3
640	ind_1,300417093	-31.717	C1CCCCC1NC(=O)c(c2NC3(C)CC3)[nH]c(c24)cccc4
641	ind_1,39272465	-44.679	C1CCCCC1NC(=O)c(c2CCC3(O)CC3)[nH]c(c24)cccc4
642	ind_1,36854071	-43.29	C1CCCCC1NC(=O)c(c2N(C)CC3(C)CC3)[nH]c(c24)cccc4
643	ind_1,1011894	-38.578	C1CCCCC1NC(=O)c([nH]c(c23)cccc3)c2C[NH2+]C4CCCC4
644	GR-17	-54.201	C1CCCCC1NC(=O)c([nH]c(c23)cccc3)c2C[NH+]4CCCCC4
645	GR-19	-52.843	C1CCCCC1NC(=O)c(c2C[NH+](CC)CC)[nH]c(c23)cccc3
646	ind_1,301200613	-43.861	C1CCCCC1NC(=O)c(c2NC3(CC)C[NH2+]C3)[nH]c(c24)cccc4
647	ind_1,46306641	-24.869	C1CCCCC1NC(=O)c([nH]c(c23)cccc3)c2-n4nccc4NC
648	ind_1,36551430	-41.5	C1CCCCC1NC(=O)c(c2-c(c3CC)[nH]nc3)[nH]c(c24)cccc4
649	ind_1,43618786	-42.943	C1CCCCC1NC(=O)c([nH]c(c23)cccc3)c2C[C@@H]4C[C@@H](C4)CO
650	ind_1,10434588	-41.918	C1CCCCC1NC(=O)c([nH]c(c23)cccc3)c2-c4ccnc(n4)C
651	ind_1,34694	-35.788	C1CCCCC1NC(=O)c(c2CC3(O)CCC3)[nH]c(c24)cccc4
652	ind_1,2735831	-44.194	C1CCCCC1NC(=O)c(c2-c3ncc(F)cn3)[nH]c(c24)cccc4
653	ind_1,476462	-43.473	C1CCCCC1NC(=O)c([nH]c(c23)cccc3)c2-c4nccn4C
654	ind_1,522377	-39.919	C1CCCCC1NC(=O)c(c2COCC(C)(C)O)[nH]c(c23)cccc3
655	ind_1,300935557	-36.216	C1CCCCC1NC(=O)c([nH]c(c23)cccc3)c2C[NH2+][C@H](C4)C[C@@H]4C
656	ind_1,48885471	-45.126	C1CCCCC1NC(=O)c(c2-c3cscn3)[nH]c(c24)cccc4
657	ind_1,2721018	-40.871	C1CCCCC1NC(=O)c(c2-c3ccns3)[nH]c(c24)cccc4
658	ind_1,31416273	-45.331	CC[C@@](C)(O)CNc1c([nH]c(c12)cccc2)C(=O)NC3CCCCC3
659	ind_1,1011894	-34.94	C1CCCCC1NC(=O)c([nH]c(c23)cccc3)c2N(C)C4CCCC4
660	ind_1,28304598	-31.349	C1CCCCC1NC(=O)c(c2-c3c(O)ccs3)[nH]c(c24)cccc4
661	ind_1,44474418	-43.644	C1CCCCC1NC(=O)c([nH]c(c23)cccc3)c2-n(c4)ncc4OC
662	ind_1,300935557	-38.929	C1CCCCC1NC(=O)c(c2N(C)[C@H](C3)C[C@@H]3C)[nH]c(c24)cccc4
663	ind_1,300576789	-13.857	C1CCCCC1NC(=O)c(c2N(CC)C3CCC3)[nH]c(c24)cccc4
664	ind_1,95492457	-44.542	c1cccc(c12)[nH]c(c2C[C@@H](C)CC(=O)F)C(=O)NC3CCCCC3
665	ind_1,32176285	-22.858	c1cccc(c12)[nH]c(c2N(C)C(C)(C)C)C(=O)NC3CCCCC3
666	ind_1,13753670	-32.82	C1CCCCC1NC(=O)c(c2C[C@@H](C(C)C)[NH2+]C)[nH]c(c23)cccc3
667	ind_1,530525	-40.15	C1CCCCC1NC(=O)c(c2CC[C@H](O)CC)[nH]c(c23)cccc3
668	ind_1,6190785	-32.549	c1cccc(c12)[nH]c(c2C[C@](C)(CC)CO)C(=O)NC3CCCCC3
669	ind_1,11472329	-38.566	C1CCCCC1NC(=O)c(c2OC[C@@H](F)C)[nH]c(c23)cccc3
670	ind_1,43618786	-45.388	C1CCCCC1NC(=O)c([nH]c(c23)cccc3)c2C[C@H]4C[C@@H](C4)CO
671	ind_1,513823	-42.902	C1CCCCC1NC(=O)c([nH]c(c23)cccc3)c2NCc4ccco4
672	ind_1,190380363	-40.411	C1CCCCC1NC(=O)c(c2C[C@H](C)[C@H](C)CO)[nH]c(c23)cccc3
673	ind_1,190380363	-40.044	C1CCCCC1NC(=O)c(c2C[C@H](C)[C@@H](C)CO)[nH]c(c23)cccc3
674	ind_1,31539	-45.189	COC(/N)=C(C)\Cc1c([nH]c(c12)cccc2)C(=O)NC3CCCCC3
675	ind_1,892017	-42.218	C1CCCCC1NC(=O)c(c2-c(nc3)ncc3C)[nH]c(c24)cccc4
676	ind_1,41641592	-36.8	C1CCCCC1NC(=O)c(c2CCC3(CO)CC3)[nH]c(c24)cccc4
677	ind_1,522377	-29.591	COCC(C)(C)Oc1c([nH]c(c12)cccc2)C(=O)NC3CCCCC3
678	ind_1,299972045	-15.952	CC[C@@H](C)C(=O)Nc1c([nH]c(c12)cccc2)C(=O)NC3CCCCC3
679	ind_1,49269177	-45.334	C1CCCCC1NC(=O)c(c2O[C@H](C(F)F)C)[nH]c(c23)cccc3
680	ind_1,592012	-34.017	C1CCCCC1NC(=O)c(c2-c(c3C)c[nH]c3)[nH]c(c24)cccc4
681	ind_1,506101	-43.661	C1CCCCC1NC(=O)c(c2-c3ccoc3)[nH]c(c24)cccc4
682	ind_1,29939305	-37.114	C1CCCCC1NC(=O)c([nH]c(c23)cccc3)c2CC[C@H](O)C4CC4
683	ind_1,49269177	-44.102	C1CCCCC1NC(=O)c(c2O[C@@H](C(F)F)C)[nH]c(c23)cccc3
684	ind_1,96387665	43.809	C1CCCCC1NC(=O)c(c2N(C)[C@@H](C)CC)[nH]c(c23)cccc3
685	ind_1,45774025	-38.991	C1CCCCC1NC(=O)c([nH]c(c23)cccc3)c2OCCC4C[NH2+]C4
686	ind_1,532676	-38.183	C1CCCCC1NC(=O)c(c2-c3ccn(n3)C)[nH]c(c24)cccc4
687	ind_1,190380363	-45.392	C1CCCCC1NC(=O)c(c2C[C@@H](C)[C@@H](C)CO)[nH]c(c23)cccc3
688	ind_1,190380363	-43.895	C1CCCCC1NC(=O)c(c2C[C@@H](C)[C@H](C)CO)[nH]c(c23)cccc3
689	ind_1,48883245	-40.922	C1CCCCC1NC(=O)c(c2C[C@@H](C)OC)[nH]c(c23)cccc3
690	ind_1,851326	-39.975	C1CCCCC1NC(=O)c(c2OCC(F)F)[nH]c(c23)cccc3
691	ind_1,487115	-44.099	CCCC(=O)Nc1c([nH]c(c12)cccc2)C(=O)NC3CCCCC3
692	ind_1,44841037	-37.224	C1CCCCC1NC(=O)c([nH]c(c23)cccc3)c2N4CC[C@H]4COC
693	ind_1,31422650	-44.556	C1CCCCC1NC(=O)c(c2N[C@H](C3(F)F)C3)[nH]c(c24)cccc4
694	ind_1,595053	29.569	c1cccc(c12)[nH]c(c2NC(=O)C(C)(C)C)C(=O)NC3CCCCC3
695	ind_1,89936792	-43.131	C1CCCCC1NC(=O)c(c2-c(n[nH]3)cc3CC)[nH]c(c24)cccc4
696	ind_1,480133	-43.173	c1cccc(c12)[nH]c(c2-c(cc3C#N)ccc3)C(=O)NC4CCCCC4
697	ind_1,299972045	-40.983	CC[C@H](C)C(=O)Nc1c([nH]c(c12)cccc2)C(=O)NC3CCCCC3
698	ind_1,476050	-34.973	C1CCCCC1NC(=O)c(c2Cc3cc(C)[nH]n3)[nH]c(c24)cccc4
699	ind_1,480155	-39.952	C1CCCCC1NC(=O)c([nH]c(c23)cccc3)c2-c(n4)nccc4C
700	ind_1,96387665	-0.424	C1CCCCC1NC(=O)c(c2N(C)[C@H](C)CC)[nH]c(c23)cccc3
701	ind_1,46013797	-43.472	C1CCCCC1NC(=O)c(c2-c(n3)oc(C)c3C)[nH]c(c24)cccc4
702	ind_1,50081196	-40.734	C1CCCCC1NC(=O)c(c2NC[C@@H](F)C)[nH]c(c23)cccc3
703	ind_1,592012	-41.267	C1CCCCC1NC(=O)c([nH]c(c23)cccc3)c2Cc4cc[nH]c4
704	ind_1,28202185	-41.018	C1CCCCC1NC(=O)c([nH]c(c23)cccc3)c2NCc4ccc[nH]4
705	ind_1,2721018	-41.958	C1CCCCC1NC(=O)c(c2-c3ccsn3)[nH]c(c24)cccc4
706	ind_1,53989945	-41.435	C1CCCCC1NC(=O)c(c2-n(cn3)cc3OC)[nH]c(c24)cccc4
707	ind_1,44841037	-39.852	C1CCCCC1NC(=O)c([nH]c(c23)cccc3)c2N4CC[C@@H]4COC
708	ind_1,44826886	-43.293	C1CCCCC1NC(=O)c([nH]c(c23)cccc3)c2Cc(o4)ncc4C
709	ind_1,513894	-21.012	C1CCCCC1NC(=O)c(c2OCC3CC3)[nH]c(c24)cccc4
710	ind_1,49263101	-39.058	C1CCCCC1NC(=O)c([nH]c(c23)cccc3)c2-c(o4)ncc4CC
711	ind_1,476145	-26.545	C1CCCCC1NC(=O)c(c2O[C@@H](C)CC)[nH]c(c23)cccc3
712	ind_1,50418945	-16.705	C1CCCCC1NC(=O)c([nH]c(c23)cccc3)c2-c4c(O)cccc4
713	ind_1,300935557	-30.807	C1CCCCC1NC(=O)c(c2N(C)[C@H](C3)C[C@H]3C)[nH]c(c24)cccc4
714	ind_1,476145	-27.031	C1CCCCC1NC(=O)c(c2O[C@H](C)CC)[nH]c(c23)cccc3
715	ind_1,6885230	-16.564	C1CCCCC1NC(=O)c(c2OCC(C)C)[nH]c(c23)cccc3
716	ind_1,45983158	-38.88	C1CCCCC1NC(=O)c([nH]c(c23)cccc3)c2N4CCC[C@@H]4CC
717	ind_1,487310	-30.272	C1CCCCC1NC(=O)c(c2N[C@H](C)CC)[nH]c(c23)cccc3
718	ind_1,110786860	-42.426	C1CCCCC1NC(=O)c(c2OCC3(CC3)OC)[nH]c(c24)cccc4
719	ind_1,53989943	-43.139	C1CCCCC1NC(=O)c([nH]c(c23)cccc3)c2-n4ccnc4OC
720	ind_1,6190785	-34.372	c1cccc(c12)[nH]c(c2CCC(C)(C)CO)C(=O)NC3CCCCC3
721	ind_1,96217728	-44.073	C1CCCCC1NC(=O)c(c2Oc(c3C)coc3)[nH]c(c24)cccc4
722	ind_1,190380363	-32.368	C1CCCCC1NC(=O)c(c2C[C@@H](C(C)C)CO)[nH]c(c23)cccc3
723	ind_1,107142142	-43.743	C1CCCCC1NC(=O)c(c2C[C@H](O)C3(C)CC3)[nH]c(c24)cccc4
724	ind_1,34694	-40.633	C1CCCCC1NC(=O)c(c2OC3(C)CCC3)[nH]c(c24)cccc4
725	ind_1,15799667	-45.465	C1CCCCC1NC(=O)c([nH]c(c23)cccc3)c2-c4cc(F)cnc4
726	ind_1,190380363	-11.348	C1CCCCC1NC(=O)c(c2C[C@H](C(C)C)CO)[nH]c(c23)cccc3
727	ind_1,300576062	-41.679	C1CCCCC1NC(=O)c(c2C[N@@H+](C)CC(C)C)[nH]c(c23)cccc3
728	ind_1,300576062	-36.87	C1CCCCC1NC(=O)c(c2C[N@H+](C)CC(C)C)[nH]c(c23)cccc3
729	ind_1,883760	-44.548	C1CCCCC1NC(=O)c(c2N(C)CC(C)C)[nH]c(c23)cccc3
730	ind_1,93432619	-37.902	C1CCCCC1NC(=O)c([nH]c(c23)cccc3)c2-c(n4)occ4CC
731	ind_1,96450990	-45.291	C1CCCCC1NC(=O)c(c2N(C)C3(C)CCC3)[nH]c(c24)cccc4
732	ind_1,2735851	-38.89	C1CCCCC1NC(=O)c(c2-c3cn(cn3)CC)[nH]c(c24)cccc4
733	ind_1,31422650	-44.307	C1CCCCC1NC(=O)c(c2N[C@@H](C3(F)F)C3)[nH]c(c24)cccc4
734	ind_1,107142142	-36.319	C1CCCCC1NC(=O)c(c2C[C@@H](O)C3(C)CC3)[nH]c(c24)cccc4
735	ind_1,506101	-42.425	C1CCCCC1NC(=O)c(c2-c3ccco3)[nH]c(c24)cccc4
736	ind_1,483767	-44.344	C1CCCCC1NC(=O)c(c2C[C@H]3CCCO3)[nH]c(c24)cccc4
737	ind_1,972576	-23.3	C1CCCCC1NC(=O)c([nH]c(c23)cccc3)c2N4CCCC4(C)C
738	ind_1,11472453	-45.177	C1CCCCC1NC(=O)c(c2OCC(F)(F)C)[nH]c(c23)cccc3
739	ind_1,8814116	-44.507	C1CCC1C(=O)Nc2c([nH]c(c23)cccc3)C(=O)NC4CCCCC4
740	ind_1,43550310	6.004	C1CCCCC1NC(=O)c(c2OCC(F)(C)C)[nH]c(c23)cccc3
741	ind_1,483767	-40.995	C1CCCCC1NC(=O)c(c2C[C@@H]3CCCO3)[nH]c(c24)cccc4
742	ind_1,89938679	-45.374	C1CCCCC1NC(=O)c(c2O[C@@H](C3(F)F)C3)[nH]c(c24)cccc4
743	ind_1,478540	-44.125	C1CCCCC1NC(=O)c(c2C[C@@H](C)C[C@@H](C)O)[nH]c(c23)cccc3
744	ind_1,46306679	-24.957	C1CCCCC1NC(=O)c(c2N[C@@H]3C[C@H](F)C3)[nH]c(c24)cccc4
745	ind_1,2735851	-39.003	C1CCCCC1NC(=O)c([nH]c(c23)cccc3)c2-c4cncn4CC
746	ind_1,480423	-44.39	C1CCCCC1NC(=O)c(c2C[C@@H](C)[C@H](O)CC)[nH]c(c23)cccc3
747	ind_1,313123881	-41.036	C1CCCCC1NC(=O)c(c2OCCC(F)F)[nH]c(c23)cccc3
748	ind_1,490699	-40.74	C1CCCCC1NC(=O)c(c2-c(cc3C)cnc3)[nH]c(c24)cccc4
749	ind_1,478540	-24.447	C1CCCCC1NC(=O)c(c2C[C@@H](O)CC(C)C)[nH]c(c23)cccc3
750	ind_1,49824095	-37.055	C1CCCCC1NC(=O)c([nH]c(c23)cccc3)c2-n4cncc4CC
751	ind_1,478540	-45.225	C1CCCCC1NC(=O)c(c2C[C@H](C)C[C@H](C)O)[nH]c(c23)cccc3
752	ind_1,5769760	-43.756	C1CCCCC1NC(=O)c(c2NC3(C)CCC3)[nH]c(c24)cccc4
753	ind_1,95439182	-39.12	c1cccc(c12)[nH]c(c2OC(C)(C)C)C(=O)NC3CCCCC3
754	ind_1,31422255	-43.441	C1CCCCC1NC(=O)c(c2O[C@@H](C)C3CC3)[nH]c(c24)cccc4
755	ind_1,480423	-26.156	C1CCCCC1NC(=O)c(c2C[C@H](C)[C@@H](O)CC)[nH]c(c23)cccc3
756	ind_1,68830724	-44.123	C1CCCCC1NC(=O)c(c2-c3c(C)snc3)[nH]c(c24)cccc4
757	ind_1,300573513	-13.931	C1CCCCC1NC(=O)c(c2[N@H+](C3)C[C@]3(O)CC)[nH]c(c24)cccc4
758	ind_1,486652	-16.568	C1CCCCC1NC(=O)c([nH]c(c23)cccc3)c2OCC4CCC4
759	ind_1,24632082	-39.32	C1CC1(C)C(=O)Nc2c([nH]c(c23)cccc3)C(=O)NC4CCCCC4
760	ind_1,29915383	-42.943	c1cccc(c12)[nH]c(c2C[C@@](C)(O)CC)C(=O)NC3CCCCC3
761	ind_1,49823427	-35.81	C1CCCCC1NC(=O)c(c2-c3ccccn3)[nH]c(c24)cccc4
762	ind_1,49834243	-20.483	C1CCCCC1NC(=O)c(c2[N@@H+](CC)C3(C)CC3)[nH]c(c24)cccc4
763	ind_1,49781622	-36.824	C1CCCCC1NC(=O)c([nH]c(c23)cccc3)c2Nc4ccc[nH]4
764	ind_1,194444379	-40.457	C1CCCCC1NC(=O)c(c2Oc(oc3)cc3C)[nH]c(c24)cccc4
765	ind_1,478540	-40.383	C1CCCCC1NC(=O)c(c2C[C@H](C)C[C@@H](C)O)[nH]c(c23)cccc3
766	ind_1,300016480	-38.949	CCOC(\C)=N/c1c([nH]c(c12)cccc2)C(=O)NC3CCCCC3
767	ind_1,29915383	-19.005	c1cccc(c12)[nH]c(c2C[C@](C)(O)CC)C(=O)NC3CCCCC3
768	ind_1,31422255	-37.443	C1CCCCC1NC(=O)c(c2O[C@H](C)C3CC3)[nH]c(c24)cccc4
769	ind_1,194351444	-43.422	C1CCCCC1NC(=O)c(c2NCC(F)(F)F)[nH]c(c23)cccc3
770	ind_1,96289383	-34.601	C1CCCCC1NC(=O)c(c2NCC3(CC3)OC)[nH]c(c24)cccc4
771	ind_1,592198	-37.106	C1CCCCC1NC(=O)c(c2-n(n3)ccc3C)[nH]c(c24)cccc4
772	ind_1,25270	-32.57	C1CCCCC1NC(=O)c(c2-c3c(C)[nH]cc3)[nH]c(c24)cccc4
773	ind_1,303203871	-19.79	C1CCCCC1NC(=O)c(c2N3CC[C@@H]3C)[nH]c(c24)cccc4
774	ind_1,37994411	-37.25	C1CC1/C(OC)=N\c2c([nH]c(c23)cccc3)C(=O)NC4CCCCC4
775	ind_1,13753670	-23.983	C1CCCCC1NC(=O)c(c2N(C)[C@H](C)C(C)C)[nH]c(c23)cccc3
776	ind_1,44150303	-44.769	C1CCCCC1NC(=O)c(c2-c3c(cco3)OC)[nH]c(c24)cccc4
777	ind_1,107153614	-19.85	C1CCCCC1NC(=O)c(c2C[C@H](C3)C[C@@]3(C)O)[nH]c(c24)cccc4
778	ind_1,48553872	-41.249	C1CCCCC1NC(=O)c([nH]c(c23)cccc3)c2N=C4CCCC4
779	ind_1,41558558	-44.049	C1CCCCC1NC(=O)c(c2O[C@]3(C)C[N@H+](C)C3)[nH]c(c24)cccc4
780	ind_1,2735851	-43.1	C1CCCCC1NC(=O)c([nH]c(c23)cccc3)c2-c4nccn4CC
781	ind_1,303203871	-25.603	C1CCCCC1NC(=O)c(c2N3CC[C@H]3C)[nH]c(c24)cccc4
782	ind_1,25270	-44.341	C1CCCCC1NC(=O)c(c2-c3cc(C)[nH]c3)[nH]c(c24)cccc4
783	ind_1,31745289	-37.336	C1CCCCC1NC(=O)c(c2-c(c3C)nn(C)c3)[nH]c(c24)cccc4
784	ind_1,490931	-36.837	C1CCCCC1NC(=O)c([nH]c(c23)cccc3)c2-n4ccnc4CC
785	ind_1,13747863	-32.571	C1CCCCC1NC(=O)c(c2N(C)[C@H](C)C3CC3)[nH]c(c24)cccc4
786	ind_1,110047197	-28.935	C1CCCCC1NC(=O)c(c2N[C@H](C3)C[C@H]3C)[nH]c(c24)cccc4
787	ind_1,38654784	-36.548	C1CCCCC1NC(=O)c(c2N(C)[C@H](C3)C3(C)C)[nH]c(c24)cccc4
788	ind_1,36366693	-45.083	C1CCCCC1NC(=O)c([nH]c(c23)cccc3)c2CC4CCOCC4
789	ind_1,107846941	-43.394	C1CCCCC1NC(=O)c([nH]c(c23)cccc3)c2C[C@H]4CCCOC4
790	ind_1,107846941	-37.102	C1CCCCC1NC(=O)c([nH]c(c23)cccc3)c2C[C@@H]4CCCOC4
791	ind_1,44386357	-35.192	C1CCCCC1NC(=O)c(c2COCC(F)F)[nH]c(c23)cccc3
792	ind_1,44788992	-39.418	C1CCCCC1NC(=O)c(c2-c3csc(n3)C)[nH]c(c24)cccc4
793	ind_1,1012211	-36.702	C1CCCCC1NC(=O)c(c2[N@H+](C(C)(C)C)CC)[nH]c(c23)cccc3
794	ind_1,50870929	-39.991	C1CCCCC1NC(=O)c([nH]c(c23)cccc3)c2-n4nccc4OC
795	ind_1,107153614	-45.114	C1CCCCC1NC(=O)c(c2C[C@H](C3)C[C@]3(C)O)[nH]c(c24)cccc4
796	ind_1,39272467	-39.414	C1CCCCC1NC(=O)c(c2C[C@H](C)C3(O)CC3)[nH]c(c24)cccc4
797	ind_1,592012	-41.75	C1CCCCC1NC(=O)c(c2-c(c3C)[nH]cc3)[nH]c(c24)cccc4
798	ind_1,818220	-44.853	C1CCCCC1NC(=O)c(c2-c3c(C)n(C)nc3)[nH]c(c24)cccc4
799	ind_1,233172950	-22.396	C1CCCCC1NC(=O)c(c2O[C@H](C3)C3(C)C)[nH]c(c24)cccc4
800	ind_1,39272467	-45.201	C1CCCCC1NC(=O)c(c2C[C@@H](C)C3(O)CC3)[nH]c(c24)cccc4
801	ind_1,11467680	-38.402	C1CCCCC1NC(=O)c(c2-c3c(C)occ3)[nH]c(c24)cccc4
802	ind_1,300090988	-39.749	C1CCCCC1NC(=O)c(c2[N@H+](C(C)C)C3CC3)[nH]c(c24)cccc4
803	ind_1,25274	-36.664	C1CCCCC1NC(=O)c([nH]c(c23)cccc3)c2Cc4c(C)c[nH]c4
804	ind_1,7496738	-39.65	C1CCCCC1NC(=O)c(c2C[C@@](C)(O)C3CC3)[nH]c(c24)cccc4
805	ind_1,93431270	-37.159	C1CCCCC1NC(=O)c(c2-c(c3CC)c[nH]c3)[nH]c(c24)cccc4
806	ind_1,591893	-35.827	C1CCCCC1NC(=O)c([nH]c(c23)cccc3)c2CC4(O)CCCC4
807	ind_1,39272465	-43.613	C1CCCCC1NC(=O)c(c2OC3(CC)CC3)[nH]c(c24)cccc4
808	ind_1,7347467	-45.244	C1CCCCC1NC(=O)c([nH]c(c23)cccc3)c2NCC4CCC4
809	ind_1,44689002	-41.113	C1CCCCC1NC(=O)c([nH]c(c23)cccc3)c2Nc4ccn(C)c4
810	ind_1,25717425	-45.252	C1CCCCC1NC(=O)c(c2N[C@H](C)C3CC3)[nH]c(c24)cccc4
811	ind_1,25717425	-17.77	C1CCCCC1NC(=O)c(c2N[C@@H](C)C3CC3)[nH]c(c24)cccc4
812	ind_1,49433369	-43.593	C1CCCCC1NC(=O)c([nH]c(c23)cccc3)c2OC[C@H]4C[C@H](F)C4
813	ind_1,13732187	-35.43	c1cccc(c12)[nH]c(c2N(C)CC(C)(C)C)C(=O)NC3CCCCC3
814	ind_1,478031	-43.581	C1CCCCC1NC(=O)c([nH]c(c23)cccc3)c2OC4CCCCC4
815	ind_1,6188268	-45.096	C1CCCCC1NC(=O)c([nH]c(c23)cccc3)c2C[C@@H]4CCCCO4
816	ind_1,13753670	-44.07	C1CCCCC1NC(=O)c(c2N(C)[C@@H](C)C(C)C)[nH]c(c23)cccc3
817	ind_1,266611315	-43.474	C1CCCCC1NC(=O)c([nH]c(c23)cccc3)c2Nc4ccn(n4)C
818	ind_1,107153614	-25.011	C1CCCCC1NC(=O)c(c2C[C@]3(O)C[C@H](C)C3)[nH]c(c24)cccc4
819	ind_1,300471900	-23.786	C1CCCCC1NC(=O)c(c2NCC3(C)CC3)[nH]c(c24)cccc4
820	ind_1,716391	-39.149	C1CCCCC1NC(=O)c(c2-c(c3C)occ3)[nH]c(c24)cccc4
821	ind_1,592012	-44.538	C1CCCCC1NC(=O)c(c2-c([nH]c3)cc3C)[nH]c(c24)cccc4
822	ind_1,300952494	-39.675	C1CCCCC1NC(=O)c(c2NCC(F)(C)C)[nH]c(c23)cccc3
823	ind_1,818218	-44.65	C1CCCCC1NC(=O)c([nH]c(c23)cccc3)c2Cn(n4)ccc4C
824	ind_1,818278	-35.045	C1CCCCC1NC(=O)c([nH]c(c23)cccc3)c2-c4ccn(n4)CC
825	ind_1,50158336	-44.299	C1CCCCC1NC(=O)c(c2OC[C@H](C)CC)[nH]c(c23)cccc3
826	ind_1,477183	-45.514	C1CCCCC1NC(=O)c([nH]c(c23)cccc3)c2Nc4ccccn4
827	ind_1,6206528	-35.861	C1CCCCC1NC(=O)c([nH]c(c23)cccc3)c2NC4(C)CCCC4
828	ind_1,480335	-40.396	C1CCCCC1NC(=O)c(c2C[C@H](C)C(C)(C)O)[nH]c(c23)cccc3
829	ind_1,721016	-44.12	C1CCCCC1NC(=O)c([nH]c(c23)cccc3)c2Nc4ccnn4C
830	ind_1,6188268	-43.14	C1CCCCC1NC(=O)c([nH]c(c23)cccc3)c2C[C@H]4CCCCO4
831	ind_1,31539	-36.95	c1cccc(c12)[nH]c(c2/N=C(\C(C)C)OC)C(=O)NC3CCCCC3
832	ind_1,818218	-38.113	C1CCCCC1NC(=O)c([nH]c(c23)cccc3)c2Cc4ccn(n4)C
833	ind_1,107153614	-45.066	C1CCCCC1NC(=O)c(c2C[C@@]3(O)C[C@H](C)C3)[nH]c(c24)cccc4
834	ind_1,25270	-44.886	C1CCCCC1NC(=O)c(c2-c([nH]3)ccc3C)[nH]c(c24)cccc4
835	ind_1,76745230	-43.392	C1CCCCC1NC(=O)c(c2-n(nc3)c(C)c3C)[nH]c(c24)cccc4
836	ind_1,4352203	-39.463	C1CCCCC1NC(=O)c(c2-c(c3F)[nH]cc3F)[nH]c(c24)cccc4
837	ind_1,39272369	-35.487	C1CCCCC1NC(=O)c([nH]c(c23)cccc3)c2CCCC4(O)CC4
838	ind_1,299968638	-44.282	C1CCCCC1NC(=O)c(c2O[C@H](C)CCC)[nH]c(c23)cccc3
839	ind_1,911169	-41.316	C1CCCCC1NC(=O)c(c2CC(F)(F)F)[nH]c(c23)cccc3
840	ind_1,30485508	-39.398	C1CCCCC1NC(=O)c(c2OCC[C@@H](F)C)[nH]c(c23)cccc3
841	ind_1,15799669	-44.73	C1CCCCC1NC(=O)c(c2-c3cc(F)ccn3)[nH]c(c24)cccc4
842	ind_1,25685792	-15.413	C1CCCCC1NC(=O)c(c2N[C@@H](C)C(C)C)[nH]c(c23)cccc3
843	ind_1,40897159	-45.407	C1CCCCC1NC(=O)c([nH]c(c23)cccc3)c2OCC4(C)CCC4
844	ind_1,107153614	-41.174	C1CCCCC1NC(=O)c(c2O[C@]3(C)C[C@H](C)C3)[nH]c(c24)cccc4
845	ind_1,818278	-43.843	C1CCCCC1NC(=O)c([nH]c(c23)cccc3)c2-c4ccnn4CC
846	ind_1,89936792	-33.084	C1CCCCC1NC(=O)c([nH]c(c23)cccc3)c2-n4nccc4CC
847	ind_1,64092051	-44.142	C1CCCCC1NC(=O)c(c2-c3c(Cl)occ3)[nH]c(c24)cccc4
848	ind_1,25685792	-6.974	C1CCCCC1NC(=O)c(c2N[C@H](C)C(C)C)[nH]c(c23)cccc3
849	GR-15	-58.156	C1CCCCC1NC(=O)c([nH]c(c23)cccc3)c2C[NH2+]Cc4ccc(cc4)OC
850	ind_1,299970931	-44.546	C1CC1C(C)(C)Nc2c([nH]c(c23)cccc3)C(=O)NC4CCCCC4
851	ind_1,260220769	-39.926	C1CCCCC1NC(=O)c(c2[N@@H+](C)c3ccco3)[nH]c(c24)cccc4
852	ind_1,56973797	-21.145	C1CCCCC1NC(=O)c([nH]c(c23)cccc3)c2OC[C@H](F)C4CC4
853	ind_1,93431270	-44.116	C1CCCCC1NC(=O)c([nH]c(c23)cccc3)c2CCc4cc[nH]c4
854	ind_1,43011901	-37.278	COC(C)(C)COc1c([nH]c(c12)cccc2)C(=O)NC3CCCCC3
855	ind_1,11467680	-40.856	C1CCCCC1NC(=O)c(c2-c(o3)ccc3C)[nH]c(c24)cccc4
856	ind_1,480335	-44.426	C1CCCCC1NC(=O)c(c2C[C@@](C)(O)C(C)C)[nH]c(c23)cccc3
857	ind_1,41477527	-32.489	C1CCCCC1NC(=O)c([nH]c(c23)cccc3)c2N4CC[C@@H]4CC
858	ind_1,480091	-39.118	C1CCCCC1NC(=O)c(c2-c(cc3C)ncc3)[nH]c(c24)cccc4
859	ind_1,480335	-44.346	C1CCCCC1NC(=O)c(c2C[C@](C)(O)C(C)C)[nH]c(c23)cccc3
860	ind_1,476050	-28.402	C1CCCCC1NC(=O)c(c2-n(n3)c(C)cc3C)[nH]c(c24)cccc4
861	ind_1,41641592	-44.018	C1CCCCC1NC(=O)c(c2OCC3(CC)CC3)[nH]c(c24)cccc4
862	GR-13	-53.067	C1CCCCC1NC(=O)c([nH]c(c23)cccc3)c2C[NH2+]Cc4ccccc4
863	ind_1,64093050	-42.583	C1CCCCC1NC(=O)c([nH]c(c23)cccc3)c2Oc4cccn4C
864	ind_1,36551430	-45.373	C1CCCCC1NC(=O)c([nH]c(c23)cccc3)c2-n(c4)ncc4CC
865	ind_1,49180806	-37.632	C1CCCCC1NC(=O)c([nH]c(c23)cccc3)c2OCCC4(C)CC4
866	ind_1,29939305	-30.893	C1CCCCC1NC(=O)c(c2O[C@H](CC)C3CC3)[nH]c(c24)cccc4
867	ind_1,490699	-40.855	C1CCCCC1NC(=O)c(c2-c(c3C)nccc3)[nH]c(c24)cccc4
868	ind_1,45983777	-44.89	C1CCCCC1NC(=O)c([nH]c(c23)cccc3)c2O[C@@H](C)CC4CC4
869	ind_1,300637868	-40.651	c1cccc(c12)[nH]c(c2NCC(C)(C)C)C(=O)NC3CCCCC3
870	ind_1,64092059	-40.113	C1CCCCC1NC(=O)c(c2-c3c(Cl)cco3)[nH]c(c24)cccc4
871	ind_1,301189088	-45.029	C1CCCCC1NC(=O)c([nH]c(c23)cccc3)c2NC[C@@H]4C[C@H](F)C4
872	ind_1,300951726	11.291	C1CCCCC1NC(=O)c([nH]c(c23)cccc3)c2NCC4(F)CCC4
873	ind_1,32329348	-43.222	C1CCCCC1NC(=O)c([nH]c(c23)cccc3)c2N[C@@H](C)C4CCC4
874	ind_1,25272	-25.895	C1CCCCC1NC(=O)c([nH]c(c23)cccc3)c2Cc4c(C)[nH]cc4
875	ind_1,30156461	-39.332	C1CCCCC1NC(=O)c([nH]c(c23)cccc3)c2-c(n4)cccc4C
876	ind_1,5759047	-38.392	C1CCCCC1NC(=O)c([nH]c(c23)cccc3)c2Cn4cccc4
877	ind_1,31411515	-32.093	C1CCCCC1NC(=O)c(c2N(C3)CC3(C)C)[nH]c(c24)cccc4
878	ind_1,491019	-41.846	C1CCCCC1NC(=O)c(c2NC[C@H](C)CC)[nH]c(c23)cccc3
879	ind_1,491019	-15.652	C1CCCCC1NC(=O)c(c2NC[C@@H](C)CC)[nH]c(c23)cccc3
880	ind_1,478646	-32.681	CCC[C@](C)(O)Cc1c([nH]c(c12)cccc2)C(=O)NC3CCCCC3
881	ind_1,5759047	-40.934	C1CCCCC1NC(=O)c(c2-c3ccn(C)c3)[nH]c(c24)cccc4
882	ind_1,41612700	-43.819	C1CCCCC1NC(=O)c([nH]c(c23)cccc3)c2OC[C@@H]4C[N@H+](C)C4
883	ind_1,96093379	-39.06	C1CCCCC1NC(=O)c([nH]c(c23)cccc3)c2NC[C@H](F)C4CC4
884	ind_1,303223694	-37.806	C1CCCCC1NC(=O)c(c2N[C@](C)(C3)C3(C)C)[nH]c(c24)cccc4
885	ind_1,29915383	-8.445	c1cccc(c12)[nH]c(c2OC(C)(C)CC)C(=O)NC3CCCCC3
886	ind_1,33509449	-33.098	C1CCCCC1NC(=O)c(c2OC(C3)CC3(C)C)[nH]c(c24)cccc4
887	ind_1,25274	-38.489	C1CCCCC1NC(=O)c([nH]c(c23)cccc3)c2-c4[nH]cc(C)c4C
888	ind_1,50075000	-44.448	C1CCCCC1NC(=O)c([nH]c(c23)cccc3)c2Nc([nH]4)ccc4C
889	ind_1,301189088	-44.723	C1CCCCC1NC(=O)c([nH]c(c23)cccc3)c2NC[C@H]4C[C@H](F)C4
890	ind_1,302057499	-44.388	C1CCCCC1NC(=O)c(c2N[C@H](C3(C)C)CC3)[nH]c(c24)cccc4
891	ind_1,45983777	-41.159	C1CCCCC1NC(=O)c([nH]c(c23)cccc3)c2O[C@H](C)CC4CC4
892	ind_1,478646	-26.577	C1CCCCC1NC(=O)c(c2CCCC(C)(C)O)[nH]c(c23)cccc3
893	ind_1,537068	-45.038	C1CCCCC1NC(=O)c(c2-c(c3C)cc(C)[nH]3)[nH]c(c24)cccc4
894	ind_1,818220	-44.147	C1CCCCC1NC(=O)c([nH]c(c23)cccc3)c2Cn4nccc4C
895	ind_1,41477527	19.604	C1CCCCC1NC(=O)c([nH]c(c23)cccc3)c2N4CC[C@H]4CC
896	ind_1,32329348	-44.934	C1CCCCC1NC(=O)c([nH]c(c23)cccc3)c2N[C@H](C)C4CCC4
897	ind_1,503848	-34.681	C1CCCCC1NC(=O)c([nH]c(c23)cccc3)c2Cc4cc(C)[nH]c4
898	ind_1,490752	-42.955	C1CCCCC1NC(=O)c(c2OCC3(C)CC3)[nH]c(c24)cccc4
899	ind_1,529091	-13.069	CC[C@](C)(O)CCc1c([nH]c(c12)cccc2)C(=O)NC3CCCCC3
900	ind_1,486250	-26.269	CC(C)(C)CCOc1c([nH]c(c12)cccc2)C(=O)NC3CCCCC3
901	ind_1,503848	-33.187	C1CCCCC1NC(=O)c(c2Cc([nH]c3)cc3C)[nH]c(c24)cccc4
902	ind_1,30474322	19.952	c1cccc(c12)[nH]c(c2NC(C)(CC)CC)C(=O)NC3CCCCC3
903	ind_1,50418945	-42.82	C1CCCCC1NC(=O)c([nH]c(c23)cccc3)c2Oc4ccccc4
904	ind_1,28288688	-40.908	C1CCCCC1NC(=O)c(c2Nc(oc3)cc3C)[nH]c(c24)cccc4
905	ind_1,31505909	-5.249	C1CCCCC1NC(=O)c(c2[N@H+](C3)C[C@@]3(C)OC)[nH]c(c24)cccc4
906	ind_1,500549	-39.678	C1CCCCC1NC(=O)c(c2-c3c(CC)[nH]cc3)[nH]c(c24)cccc4
907	ind_1,64092051	-44.75	C1CCCCC1NC(=O)c(c2-c3ccc(o3)Cl)[nH]c(c24)cccc4
908	ind_1,41997772	-37.706	C1CCCCC1NC(=O)c(c2OC3(CC)CCC3)[nH]c(c24)cccc4
909	ind_1,190380363	-44.262	C1CCCCC1NC(=O)c(c2OC[C@@H](C)C(C)C)[nH]c(c23)cccc3
910	ind_1,107153614	-38.113	C1CCCCC1NC(=O)c(c2O[C@@]3(C)C[C@H](C)C3)[nH]c(c24)cccc4
911	ind_1,24179700	-41.883	C1CCCCC1NC(=O)c(c2-c3cccs3)[nH]c(c24)cccc4
912	ind_1,93431270	-43.747	C1CCCCC1NC(=O)c(c2-c(c3CC)[nH]cc3)[nH]c(c24)cccc4
913	ind_1,25272	-39.18	C1CCCCC1NC(=O)c(c2Cc(c3C)[nH]cc3)[nH]c(c24)cccc4
914	ind_1,503848	-41.973	C1CCCCC1NC(=O)c(c2-c(c3C)[nH]c(C)c3)[nH]c(c24)cccc4
915	ind_1,591893	-45.303	C1CCCCC1NC(=O)c([nH]c(c23)cccc3)c2OC4(C)CCCC4
916	ind_1,96462825	-40.155	C1CCCCC1NC(=O)c(c2N[C@H](CC)C3CC3)[nH]c(c24)cccc4
917	ind_1,36092664	-45.35	C1CCCCC1NC(=O)c([nH]c(c23)cccc3)c2NCCC4CCC4
918	ind_1,32345160	-42.979	C1CCCCC1NC(=O)c(c2CCC(F)F)[nH]c(c23)cccc3
919	ind_1,24179700	-36.272	C1CCCCC1NC(=O)c(c2-c3ccsc3)[nH]c(c24)cccc4
920	ind_1,478540	-43.064	C1CCCCC1NC(=O)c(c2O[C@@H](C)CC(C)C)[nH]c(c23)cccc3
921	ind_1,300547801	-40.984	C1CCCCC1NC(=O)c(c2[N@H+]3CCC3(C)C)[nH]c(c24)cccc4
922	ind_1,300470449	-38.425	C1CCCCC1NC(=O)c([nH]c(c23)cccc3)c2NC[C@@H](C)C4CC4
923	ind_1,37178025	-31.456	C1CCCCC1NC(=O)c(c2C[C@H](F)CC)[nH]c(c23)cccc3
924	ind_1,478540	-34.343	C1CCCCC1NC(=O)c(c2O[C@H](C)CC(C)C)[nH]c(c23)cccc3
925	ind_1,970002	-42.27	C1CCCCC1NC(=O)c([nH]c(c23)cccc3)c2CCn4cccc4
926	ind_1,43618786	-40.265	C1CCCCC1NC(=O)c([nH]c(c23)cccc3)c2OC[C@H]4C[C@H](C)C4
927	ind_1,505957	-43.774	c1cccc(c12)[nH]c(c2OCC(C)(C)C)C(=O)NC3CCCCC3
928	ind_1,25272	-40.563	C1CCCCC1NC(=O)c(c2-c(c3)[nH]c(C)c3C)[nH]c(c24)cccc4
929	ind_1,110054751	-31.663	C1CCCCC1NC(=O)c(c2CCC3CC3)[nH]c(c24)cccc4
930	ind_1,300432995	-1.062	c1cccc(c12)[nH]c(c2NC(C)(C)C(C)C)C(=O)NC3CCCCC3
931	ind_1,96487693	-40.774	C1CCCCC1NC(=O)c([nH]c(c23)cccc3)c2N[C@@H](C)CC4CC4
932	ind_1,106287920	-35.879	C1CCCCC1NC(=O)c([nH]c(c23)cccc3)c2-c4ccccc4
933	ind_1,25685652	-45.155	c1cccc(c12)[nH]c(c2N[C@@H](C)C(C)(C)C)C(=O)NC3CCCCC3
934	ind_1,37178025	-15.592	C1CCCCC1NC(=O)c(c2CC[C@@H](F)C)[nH]c(c23)cccc3
935	ind_1,300419942	-45.55	C1CCCCC1NC(=O)c(c2C[C@H]([NH2+]3)CC3(C)C)[nH]c(c24)cccc4
936	ind_1,190380363	-29.308	C1CCCCC1NC(=O)c(c2OC[C@H](C)C(C)C)[nH]c(c23)cccc3
937	ind_1,529091	-35.067	c1cccc(c12)[nH]c(c2OC(C)(CC)CC)C(=O)NC3CCCCC3
938	ind_1,10501119	-44.151	C1CCCCC1NC(=O)c([nH]c(c23)cccc3)c2O[C@H](C)C4CCC4
939	ind_1,39272467	-43.089	C1CCCCC1NC(=O)c(c2OC3(C(C)C)CC3)[nH]c(c24)cccc4
940	ind_1,37178025	-29.216	C1CCCCC1NC(=O)c(c2CC[C@H](F)C)[nH]c(c23)cccc3
941	ind_1,96093785	-39.193	C1CCCCC1NC(=O)c(c2N(C3)[C@H](C)C3(C)C)[nH]c(c24)cccc4
942	ind_1,592012	-25.403	C1CCCCC1NC(=O)c(c2-n(c3)ccc3C)[nH]c(c24)cccc4
943	ind_1,300461411	-3.83	C1CCCCC1NC(=O)c(c2N[C@H](C(C)C)CC)[nH]c(c23)cccc3
944	ind_1,500549	-44.048	C1CCCCC1NC(=O)c([nH]c(c23)cccc3)c2CCc4ccc[nH]4
945	ind_1,7496738	-42.849	C1CC1C(C)(C)Oc2c([nH]c(c23)cccc3)C(=O)NC4CCCCC4
946	ind_1,31214600	-34.895	C1CCCCC1NC(=O)c(c2-c3c(F)ccs3)[nH]c(c24)cccc4
947	ind_1,39280610	-36.966	CCC(C)(C)CNc1c([nH]c(c12)cccc2)C(=O)NC3CCCCC3
948	ind_1,36726021	-18.249	C1CCCCC1NC(=O)c(c2NC[C@H](C)C(C)C)[nH]c(c23)cccc3
949	ind_1,40295810	-41.879	C1CCCCC1NC(=O)c([nH]c(c23)cccc3)c2N4CC[C@@H]4CCC
950	ind_1,301221422	-41.197	C1CCCCC1NC(=O)c(c2N[C@H](C)CC(C)C)[nH]c(c23)cccc3
951	ind_1,107073313	-43.59	C1CCCCC1NC(=O)c(c2-c(c3C)cn(C)c3)[nH]c(c24)cccc4
952	ind_1,40295808	-39.016	C1CCCCC1NC(=O)c([nH]c(c23)cccc3)c2N4CC[C@@H]4C(C)C
953	ind_1,40336145	-39.782	C1CCCCC1NC(=O)c([nH]c(c23)cccc3)c2CC[C@]4(C)CC[NH2+]4
954	ind_1,252396482	-43.429	c1cccc(c12)[nH]c(c2C[C@](F)(C)CC)C(=O)NC3CCCCC3
955	ind_1,500549	-37.242	C1CCCCC1NC(=O)c([nH]c(c23)cccc3)c2-c([nH]4)ccc4CC
956	ind_1,252396482	-28.257	c1cccc(c12)[nH]c(c2C[C@@](F)(C)CC)C(=O)NC3CCCCC3
957	ind_1,31214600	-43.498	C1CCCCC1NC(=O)c(c2-c3c(F)csc3)[nH]c(c24)cccc4
958	ind_1,31745281	-30.962	C1CCCCC1NC(=O)c(c2-c3c(F)scc3)[nH]c(c24)cccc4
959	ind_1,96751764	-44.007	C1CCCCC1NC(=O)c(c2N(C3)CC3[C@H](F)C)[nH]c(c24)cccc4
960	ind_1,107142142	-39.079	C1CCCCC1NC(=O)c(c2O[C@H](C)C3(C)CC3)[nH]c(c24)cccc4
961	ind_1,912148	-37.563	C1CCCCC1NC(=O)c(c2CCC(F)(F)F)[nH]c(c23)cccc3
962	ind_1,107073313	-42.367	C1CCCCC1NC(=O)c([nH]c(c23)cccc3)c2Cn(c4)ccc4C
963	ind_1,480335	-45.381	c1cccc(c12)[nH]c(c2OC(C)(C)C(C)C)C(=O)NC3CCCCC3
964	ind_1,30485516	-42.885	C1CCCCC1NC(=O)c(c2CCC(F)(F)C)[nH]c(c23)cccc3
965	ind_1,72974254	-5.241	C1CCCCC1NC(=O)c([nH]c(c23)cccc3)c2CC4CCCC4
966	ind_1,107073313	-40.699	C1CCCCC1NC(=O)c([nH]c(c23)cccc3)c2Cc4ccn(C)c4
967	ind_1,11467682	-37.528	C1CCCCC1NC(=O)c(c2-c(c3C)scc3)[nH]c(c24)cccc4
968	ind_1,4352203	-39.878	C1CCCCC1NC(=O)c(c2-n(c3)cc(F)c3F)[nH]c(c24)cccc4
969	ind_1,44152996	-44.457	C1CCCCC1NC(=O)c([nH]c(c23)cccc3)c2OC[C@@H](C)C4CC4
970	ind_1,40295808	-30.347	C1CCCCC1NC(=O)c([nH]c(c23)cccc3)c2N4CC[C@H]4C(C)C
971	ind_1,480423	-35.092	C1CCCCC1NC(=O)c(c2O[C@@H](C(C)C)CC)[nH]c(c23)cccc3
972	ind_1,11467682	-44.633	C1CCCCC1NC(=O)c(c2-c(sc3)cc3C)[nH]c(c24)cccc4
973	ind_1,42289313	-36.633	C1CCCCC1NC(=O)c(c2N(C3)CC3(C)CC)[nH]c(c24)cccc4
974	ind_1,107073313	-40.95	C1CCCCC1NC(=O)c(c2-c(c3C)n(C)cc3)[nH]c(c24)cccc4
975	ind_1,6190785	-41.287	CCC(C)(C)COc1c([nH]c(c12)cccc2)C(=O)NC3CCCCC3
976	ind_1,25272	-42.915	C1CCCCC1NC(=O)c(c2-n(cc3)c(C)c3C)[nH]c(c24)cccc4
977	ind_1,252396482	-44.168	C1CCCCC1NC(=O)c(c2CCC(F)(C)C)[nH]c(c23)cccc3
978	ind_1,40295810	-43.661	C1CCCCC1NC(=O)c([nH]c(c23)cccc3)c2N4CC[C@H]4CCC
979	ind_1,503848	-38.431	C1CCCCC1NC(=O)c(c2-n(c3)c(C)cc3C)[nH]c(c24)cccc4
980	ind_1,300419942	-28.459	C1CCCCC1NC(=O)c(c2[N@H+]3[C@H](C)CC3(C)C)[nH]c(c24)cccc4
981	ind_1,477532	-43.88	C1CCCCC1NC(=O)c([nH]c(c23)cccc3)c2Nc4ccccc4
982	ind_1,500549	-35.393	C1CCCCC1NC(=O)c([nH]c(c23)cccc3)c2-n4cccc4CC
983	ind_1,114324472	-43.096	C1CCCCC1NC(=O)c([nH]c(c23)cccc3)c2Cc4cccn4C
984	ind_1,970002	-35.76	C1CCCCC1NC(=O)c([nH]c(c23)cccc3)c2-c4cccn4CC
985	ind_1,93431270	-39.187	C1CCCCC1NC(=O)c([nH]c(c23)cccc3)c2-n(c4)ccc4CC
986	ind_1,37178023	-35.985	C1CCCCC1NC(=O)c(c2CCC[C@H](F)C)[nH]c(c23)cccc3
987	ind_1,37178023	-42.304	C1CCCCC1NC(=O)c(c2CCC[C@@H](F)C)[nH]c(c23)cccc3
988	ind_1,44151409	-0.886	C1CCCCC1NC(=O)c(c2C[C@H](C)CCC)[nH]c(c23)cccc3
989	ind_1,300473336	-42.125	C1CCCCC1NC(=O)c([nH]c(c23)cccc3)c2CCC4CCCC4
990	ind_1,53989571	-2.699	C1CCCCC1NC(=O)c(c2N(CN3)C=C3O)[nH]c(c24)cccc4
991	ind_1,97176676	-15.626	C1CCCCC1NC(=O)c(c2CN(CN3)C=C3O)[nH]c(c24)cccc4
992	ind_1,97176676	-17.29	C1CCCCC1NC(=O)c(c2[C@H](N3)N(C)C=C3O)[nH]c(c24)cccc4
993	ind_1,97176676	-30.679	C1CCCCC1NC(=O)c([nH]c(c23)cccc3)c2C4=C(O)NCN4C
994	ind_1,106520066	-28.136	C1CCCCC1NC(=O)c(c2N([C@H](C)N3)C=C3O)[nH]c(c24)cccc4
995	ind_1,195122630	-4.598	C1CCCCC1NC(=O)c(c2N(C3)CC[C@H]3N)[nH]c(c24)cccc4
996	ind_1,195122630	-13.918	C1CCCCC1NC(=O)c(c2N(C3)CC[C@@H]3N)[nH]c(c24)cccc4
997	ind_1,266611315	-43.248	C1CCCCC1NC(=O)c([nH]c(c23)cccc3)c2N4N(C)CC=C4N
998	ind_1,303914592	-39.603	C1CCCCC1NC(=O)c(c2CNCCN)[nH]c(c23)cccc3
999	ind_1,303914592	-39.801	C1CCCCC1NC(=O)c(c2N(C)CCN)[nH]c(c23)cccc3
1000	ind_1,303914592	-44.839	C1CCCCC1NC(=O)c(c2N(C)CCN)[nH]c(c23)cccc3
